# Supplementary material for: Bt-modified transgenic rice shifted the composition and diversity of rhizosphere microbiota
Source: Preprints.org preprint supplement (doi:10.20944/preprints202402.1379.v1), 2024-02-23
Supplement: Supplementary file 1 [file Table S1.xlsx]

## Sheet: S1
Table S1 Detail information of each sample.
Samples	Treatments	Developing_stages	Barcode	LinkerPrimerSequence	ReversePrimer	raw_sequences	clean_sequences	HQ_sequences	HQseqs_in_TIC	HQseqs_in_ACM	Description
S1F1	NonGM	StageI	ACGAGTG	TGCAACGCGAAGAACCTTACC	GCCCGGGAACGTATTCACCG	5836	5027	2373	1600	903	F20111228-1_NonGM_rice
S1F2	NonGM	StageI	AGACGCA	TGCAACGCGAAGAACCTTACC	GCCCGGGAACGTATTCACCG	7236	6286	3286	1600	913	F20111228-2_NonGM_rice
S1F3	NonGM	StageI	AGCACTG	TGCAACGCGAAGAACCTTACC	GCCCGGGAACGTATTCACCG	6105	5243	2660	1600	896	F20111228-3_NonGM_rice
S1F4	NonGM	StageI	ATCAGAC	TGCAACGCGAAGAACCTTACC	GCCCGGGAACGTATTCACCG	5257	4489	2240	1600	868	F20111228-4_NonGM_rice
S1K1	CK	StageI	ATATCGC	TGCAACGCGAAGAACCTTACC	GCCCGGGAACGTATTCACCG	13530	11835	7001	1600	845	K20111228-1_Control
S1K2	CK	StageI	ATATCGC	TGCAACGCGAAGAACCTTACC	GCCCGGGAACGTATTCACCG	669	N/A	N/A	N/A	N/A	K20111228-2_Control
S1K3	CK	StageI	CGTGTCT	TGCAACGCGAAGAACCTTACC	GCCCGGGAACGTATTCACCG	8382	7132	3384	1600	906	K20111228-3_Control
S1K4	CK	StageI	CTCGCGT	TGCAACGCGAAGAACCTTACC	GCCCGGGAACGTATTCACCG	6536	5550	2793	1600	859	K20111228-4_Control
S1T1	GM	StageI	TAGTATC	TGCAACGCGAAGAACCTTACC	GCCCGGGAACGTATTCACCG	7628	6590	3044	1600	865	T20111228-1_GM_rice
S1T2	GM	StageI	TCTCTAT	TGCAACGCGAAGAACCTTACC	GCCCGGGAACGTATTCACCG	6173	5369	2443	1600	861	T20111228-2_GM_rice
S1T3	GM	StageI	TGATACG	TGCAACGCGAAGAACCTTACC	GCCCGGGAACGTATTCACCG	5137	4448	1966	1600	841	T20111228-3_GM_rice
S1T4	GM	StageI	TACTGAG	TGCAACGCGAAGAACCTTACC	GCCCGGGAACGTATTCACCG	5691	4973	2278	1600	878	T20111228-4_GM_rice
S1T5	GM	StageI	TCACGTG	TGCAACGCGAAGAACCTTACC	GCCCGGGAACGTATTCACCG	3477	3050	1638	1600	940	T20111228-5_GM_rice
S2F1	NonGM	StageII	TGCATCT	TGCAACGCGAAGAACCTTACC	GCCCGGGAACGTATTCACCG	6065	5270	2785	1600	931	F20120209-1_NonGM_rice
S2F2	NonGM	StageII	TAGCACA	TGCAACGCGAAGAACCTTACC	GCCCGGGAACGTATTCACCG	6788	5831	3263	1600	954	F20120209-2_NonGM_rice
S2F3	NonGM	StageII	TCGTCGA	TGCAACGCGAAGAACCTTACC	GCCCGGGAACGTATTCACCG	7568	6643	3687	1600	915	F20120209-3_NonGM_rice
S2F4	NonGM	StageII	TGTACTG	TGCAACGCGAAGAACCTTACC	GCCCGGGAACGTATTCACCG	4661	4095	2296	1600	870	F20120209-4_NonGM_rice
S2F5	NonGM	StageII	TCAGTAC	TGCAACGCGAAGAACCTTACC	GCCCGGGAACGTATTCACCG	5519	4813	2588	1600	927	F20120209-5_NonGM_rice
S2K1	CK	StageII	TATAGCA	TGCAACGCGAAGAACCTTACC	GCCCGGGAACGTATTCACCG	6244	5378	3283	1600	979	K20120209-1_Control
S2K2	CK	StageII	TGCTATG	TGCAACGCGAAGAACCTTACC	GCCCGGGAACGTATTCACCG	6517	5640	3252	1600	933	K20120209-2_Control
S2K3	CK	StageII	TCTAGTC	TGCAACGCGAAGAACCTTACC	GCCCGGGAACGTATTCACCG	4398	3868	2140	1600	967	K20120209-3_Control
S2K4	CK	StageII	TACGACA	TGCAACGCGAAGAACCTTACC	GCCCGGGAACGTATTCACCG	5034	4412	2405	1600	945	K20120209-4_Control
S2K5	CK	StageII	TGTGCTA	TGCAACGCGAAGAACCTTACC	GCCCGGGAACGTATTCACCG	4821	4222	2285	1600	909	K20120209-5_Control
S2T1	GM	StageII	TCACTCG	TGCAACGCGAAGAACCTTACC	GCCCGGGAACGTATTCACCG	3999	3501	1864	1600	954	T20120209-1_GM_rice
S2T2	GM	StageII	TACTCTG	TGCAACGCGAAGAACCTTACC	GCCCGGGAACGTATTCACCG	5582	4826	2766	1600	896	T20120209-2_GM_rice
S2T3	GM	StageII	TGGACTC	TGCAACGCGAAGAACCTTACC	GCCCGGGAACGTATTCACCG	4797	3298	1719	1600	986	T20120209-3_GM_rice
S2T4	GM	StageII	TCTGTAG	TGCAACGCGAAGAACCTTACC	GCCCGGGAACGTATTCACCG	5392	4724	2459	1600	920	T20120209-4_GM_rice
S2T5	GM	StageII	TACACTC	TGCAACGCGAAGAACCTTACC	GCCCGGGAACGTATTCACCG	7387	6486	3571	1600	909	T20120209-5_GM_rice
S3F1	NonGM	StageIII	TGATCGC	TGCAACGCGAAGAACCTTACC	GCCCGGGAACGTATTCACCG	5022	4366	2346	1600	955	F20120319-1_NonGM_rice
S3F2	NonGM	StageIII	TCGTCAT	TGCAACGCGAAGAACCTTACC	GCCCGGGAACGTATTCACCG	8780	7594	4889	1600	871	F20120319-2_NonGM_rice
S3F3	NonGM	StageIII	TATCAGC	TGCAACGCGAAGAACCTTACC	GCCCGGGAACGTATTCACCG	5391	4779	2605	1600	913	F20120319-3_NonGM_rice
S3F4	NonGM	StageIII	TGCGACG	TGCAACGCGAAGAACCTTACC	GCCCGGGAACGTATTCACCG	5019	4350	2555	1600	914	F20120319-4_NonGM_rice
S3F5	NonGM	StageIII	ATACAGA	TGCAACGCGAAGAACCTTACC	GCCCGGGAACGTATTCACCG	5190	4463	2448	1600	907	F20120319-5_NonGM_rice
S3K1	CK	StageIII	ATGTCTC	TGCAACGCGAAGAACCTTACC	GCCCGGGAACGTATTCACCG	6381	5578	2984	1600	966	K20120319-1_Control
S3K2	CK	StageIII	ATCTGCA	TGCAACGCGAAGAACCTTACC	GCCCGGGAACGTATTCACCG	5407	4668	2751	1600	927	K20120319-2_Control
S3K3	CK	StageIII	ATGCTAG	TGCAACGCGAAGAACCTTACC	GCCCGGGAACGTATTCACCG	3599	3063	1696	1600	987	K20120319-3_Control
S3K4	CK	StageIII	ATCGCAC	TGCAACGCGAAGAACCTTACC	GCCCGGGAACGTATTCACCG	6600	5799	3328	1600	925	K20120319-4_Control
S3K5	CK	StageIII	ATAGAGT	TGCAACGCGAAGAACCTTACC	GCCCGGGAACGTATTCACCG	5519	4805	2500	1600	911	K20120319-5_Control
S3T1	GM	StageIII	AGATAGT	TGCAACGCGAAGAACCTTACC	GCCCGGGAACGTATTCACCG	6595	5692	3158	1600	884	T20120319-1_GM_rice
S3T2	GM	StageIII	AGCATCG	TGCAACGCGAAGAACCTTACC	GCCCGGGAACGTATTCACCG	6595	4978	2786	1600	849	T20120319-2_GM_rice
S3T3	GM	StageIII	AGTCGTC	TGCAACGCGAAGAACCTTACC	GCCCGGGAACGTATTCACCG	5134	4515	2136	1600	886	T20120319-3_GM_rice
S3T4	GM	StageIII	AGAGCAG	TGCAACGCGAAGAACCTTACC	GCCCGGGAACGTATTCACCG	4952	4302	2401	1600	827	T20120319-4_GM_rice
S3T5	GM	StageIII	AGCTCTA	TGCAACGCGAAGAACCTTACC	GCCCGGGAACGTATTCACCG	5281	4558	2459	1600	860	T20120319-5_GM_rice
S4F1	NonGM	StageIV	AGTATAC	TGCAACGCGAAGAACCTTACC	GCCCGGGAACGTATTCACCG	6397	5636	3121	1600	931	F20120416-1_NonGM_rice
S4F2	NonGM	StageIV	AGTGCGA	TGCAACGCGAAGAACCTTACC	GCCCGGGAACGTATTCACCG	6982	6093	3685	1600	874	F20120416-2_NonGM_rice
S4F3	NonGM	StageIV	ACACACG	TGCAACGCGAAGAACCTTACC	GCCCGGGAACGTATTCACCG	8407	7442	4278	1600	880	F20120416-3_NonGM_rice
S4F4	NonGM	StageIV	ACAGCGA	TGCAACGCGAAGAACCTTACC	GCCCGGGAACGTATTCACCG	10399	9039	5169	1600	859	F20120416-4_NonGM_rice
S4F5	NonGM	StageIV	ACATACT	TGCAACGCGAAGAACCTTACC	GCCCGGGAACGTATTCACCG	7599	6592	3784	1600	812	F20120416-5_NonGM_rice
S4K1	CK	StageIV	ACTCTCA	TGCAACGCGAAGAACCTTACC	GCCCGGGAACGTATTCACCG	7110	6193	3498	1600	906	K20120416-1_Control
S4K2	CK	StageIV	ACTGAGC	TGCAACGCGAAGAACCTTACC	GCCCGGGAACGTATTCACCG	5094	4463	2402	1600	881	K20120416-2_Control
S4K3	CK	StageIV	ACTATAC	TGCAACGCGAAGAACCTTACC	GCCCGGGAACGTATTCACCG	6458	5556	3334	1600	886	K20120416-3_Control
S4K4	CK	StageIV	ACGACGA	TGCAACGCGAAGAACCTTACC	GCCCGGGAACGTATTCACCG	6043	5139	2758	1600	888	K20120416-4_Control
S4T1	GM	StageIV	CATGCAG	TGCAACGCGAAGAACCTTACC	GCCCGGGAACGTATTCACCG	6017	5175	3142	1600	845	T20120416-1_GM_rice
S4T2	GM	StageIV	CACGTAC	TGCAACGCGAAGAACCTTACC	GCCCGGGAACGTATTCACCG	7800	6818	3836	1600	839	T20120416-2_GM_rice
S4T3	GM	StageIV	CAGAGAG	TGCAACGCGAAGAACCTTACC	GCCCGGGAACGTATTCACCG	11628	10052	5960	1600	805	T20120416-3_GM_rice
S4T4	GM	StageIV	CACATGA	TGCAACGCGAAGAACCTTACC	GCCCGGGAACGTATTCACCG	8453	6773	3982	1600	806	T20120416-4_GM_rice
S4T5	GM	StageIV	CAGCGTA	TGCAACGCGAAGAACCTTACC	GCCCGGGAACGTATTCACCG	9629	8241	4554	1600	827	T20120416-5_GM_rice
S5F1	NonGM	StageV	CATAGAC	TGCAACGCGAAGAACCTTACC	GCCCGGGAACGTATTCACCG	4104	3503	1816	1600	910	F20120512-1_NonGM_rice
S5F2	NonGM	StageV	CACGAGA	TGCAACGCGAAGAACCTTACC	GCCCGGGAACGTATTCACCG	9008	7394	4380	1600	919	F20120512-2_NonGM_rice
S5F3	NonGM	StageV	CTCAGTA	TGCAACGCGAAGAACCTTACC	GCCCGGGAACGTATTCACCG	8551	7437	4389	1600	859	F20120512-3_NonGM_rice
S5F4	NonGM	StageV	CTGCAGT	TGCAACGCGAAGAACCTTACC	GCCCGGGAACGTATTCACCG	7339	6247	3514	1600	880	F20120512-4_NonGM_rice
S5F5	NonGM	StageV	CTATACG	TGCAACGCGAAGAACCTTACC	GCCCGGGAACGTATTCACCG	9112	7672	4559	1600	902	F20120512-5_NonGM_rice
S5K1	CK	StageV	CTCGCGA	TGCAACGCGAAGAACCTTACC	GCCCGGGAACGTATTCACCG	8136	6923	3677	1600	931	K20120512-1_Control
S5K2	CK	StageV	CTGTATA	TGCAACGCGAAGAACCTTACC	GCCCGGGAACGTATTCACCG	3971	3345	1723	1600	880	K20120512-2_Control
S5K3	CK	StageV	CTACACA	TGCAACGCGAAGAACCTTACC	GCCCGGGAACGTATTCACCG	8199	7057	3829	1600	864	K20120512-3_Control
S5K4	CK	StageV	CGCAGTC	TGCAACGCGAAGAACCTTACC	GCCCGGGAACGTATTCACCG	10210	8767	5144	1600	855	K20120512-4_Control
S5K5	CK	StageV	CGATCAG	TGCAACGCGAAGAACCTTACC	GCCCGGGAACGTATTCACCG	8965	7807	4310	1600	889	K20120512-5_Control
S5T1	GM	StageV	CGTATAG	TGCAACGCGAAGAACCTTACC	GCCCGGGAACGTATTCACCG	9412	8105	4829	1600	876	T20120512-1_GM_rice
S5T2	GM	StageV	CGTATAG	TGCAACGCGAAGAACCTTACC	GCCCGGGAACGTATTCACCG	1943	N/A	N/A	N/A	N/A	T20120512-2_GM_rice
S5T3	GM	StageV	CGCACAT	TGCAACGCGAAGAACCTTACC	GCCCGGGAACGTATTCACCG	7348	6276	3422	1600	828	T20120512-3_GM_rice
S5T4	GM	StageV	CGCTGTC	TGCAACGCGAAGAACCTTACC	GCCCGGGAACGTATTCACCG	6047	5151	2724	1600	835	T20120512-4_GM_rice
S5T5	GM	StageV	CGTACGC	TGCAACGCGAAGAACCTTACC	GCCCGGGAACGTATTCACCG	4668	3759	2292	1600	857	T20120512-5_GM_rice
