# Supplementary material for: Bt-modified transgenic rice shifted the composition and diversity of rhizosphere microbiota
Source: Preprints.org preprint supplement (doi:10.20944/preprints202402.1379.v1), 2024-02-23
Supplement: Supplementary file 2 [file Table S10.xlsx]

## Sheet: S10
Table S10 BLAST results to RDP database of cloned sequences selected from DDGE experiment.
DGGE_band_code	Seq_No.	Seq_length(bp)	Phylum	Class	Order	Family	Genus	Speciese	RDP locus No.	RDP S_ab score	Sequences
1	9.27XDG122-1-M13-	433	Proteobacteria	Gammaproteobacteria	Pseudomonadales	Pseudomonadaceae	Pseudomonas	Pseudomonas lurida	S000143918	0.762	AACGCGAAGAACCTTACCAGGGCTTGACATCCCTCTGATCCTCCTAGAGATAGGAGCTCCCTTCGGGGCAGAGGTGACAGGTGGTGCATGGTTGTCGTCAGCTCGTGTCGTGAGATGTTGGGTTAAGTCCCGCAACGAGCGCAACCCTTGTCCTTAGTTGCCAGCATTCAGTTGGGCACTCTAGGGAGACTGCCGTCGACAAACCGGAGGAAGGTGGGGATGACGTCAAGTCATCATGGCCCTTACGGCCTGGGCTACACACGTGCTACAATGGTCGGTACAGAGGGTTGCCAAGCCGCGAGGTGGAGCTAATCCCATAAAACCGATCGTAGTCCGGATCGCAGTCTGCAACTCGACTGCGTGAAGTCGGAATCGCTAGTAATCGCGAATCAGAATGTC…
2	10.25XDG122-2-M13-	433	Firmicutes	Clostridia	Clostridiales	Lachnospiraceae	Cellulosilyticum	uncultured Cellulosilyticum sp	S003601351	0.837	AACGCGAAGAACCTTACCAGGCCTTGACATCCAATGAACTTTCTAGAGATAGATTGGTGCCTTCGGGAACATTGAGACAGGTGGTGCATGGTTGTCGTCAGCTCGTGTCGTGAGATGTTGGGTTAAGTCCCGCAACGAGCGCAACCCCTATTCTTAGTAGCCATCATTCAGTTGGGCACTCTAGGGAGACTGCCAGGGATAACCTGGAGGAAGGTGGGGATGACGTCAAATCATCATGCCCCTTATGTTTAGGGCTACACACGTGCTACAATGGCTGCTACAAAGGGAAGCGATCTAGTGATAGTCAGCAAACCTCAAAAAAGCAGTCCCAGTTCGGATTGTAGTCTGCAACTCGACTACATGAAGTTGGAATCGCTAGTAATCGCGAATCAGAATGTC…
3	10.25XDG122-3-M13-	435	Proteobacteria	Gammaproteobacteria				Legionella feeleii	S000000143	0.641	AACGCGAAGAACCTTACCTACCCTTGACATACTCAGAATTCTGCAGAGATGCGGAAGTGCCGAAAGGAACTGGGATACAGGTGCTGCATGGCTGTCGTCAGCTCGTGTCGTGAGATGTTGGGTTAAGTCCCGTAACGAGCGCAACCCTTGTCTCTAGTTGCCAGCATGTGATGATGGGAACTCTAGAGAGACTGCCGGTGACAAACCGGAGGAAGGCGGGGACGACGTCAAGTCATCATGGCCTTTATGGGTAGGGCTACACACGTGCTACAATGGGCCGTACAAAGGGTTGCCAAACGGTGACGTGGGGCCAATCCCAGAAAACGGCTCGTAGTCCAGATTGGAGTCTGCAACTCGACTCCATGAAGTCGGAATCGCTAGTAATCGCAGATCAGAATG…
4	10.22XDG122-4-M13-	435	Proteobacteria	Gammaproteobacteria				Pseudomonas fluorescens	S000003261	0.953	AACGCGAAGAACCTTACCAGGCCTTGACATCCAATGAACTTTCTAGAGATAGATTGGTGCCTTCGGGAACATTGAGACAGGTGCTGCATGGCTGTCGTCAGCTCGTGTCGTGAGATGTTGGGTTAAGTCCCGTAACGAGCGCAACCCTTGTCCTTAGTTACCAGCACGTAATGGTGGGCACTCTAAGGAGACTGCCGGTGACAAACCGGAGGAAGGTGGGGATGACGTCAAGTCATCATGGCCCTTACGGCCTGGGCTACACACGTGCTACAATGGTCGGCACAGAGGGTTGCCAAGCCGCGAGGTGGAGCTAATCCCATAAAACCGATCGTAGTCCGGATCGCAGTCTGCAACTCGACTGCGTGAAGTCGGAATCGCTAGTAATCGCGAATCAGAATG…
5	10.22XDG122-5-M13-	435	Proteobacteria	Gammaproteobacteria				Pseudomonas sp	S000003261	0.953	AACGCGAAGAACCTTACCAGGCCTTGACATCCAATGAACTTTCTAGAGATAGGTTGGTGCCTTCGGGAACATTGAGACAGGTGCTGCATGGCTGTCGTCAGCTCGTGTCGTGAGATGTTGGGTTAAGTCCCGTAACGAGCGCAACCCTTGTCCTTAGTTACCAGCACGTAATGGTGGGCACTCTAAGGAGACTGCCGGTGACAAACCGGAGGAAGGTGGGGATGACGTCAAGTCATCATGGCCCTTACGGCCTGGGCTACACACGTGCTACAATGGTCGGCACAGAGGGTTGCCAAGCCGCGAGGTGGAGCTAATCCCATAAAACCGATCGTAGTCCGGATCGCAGTCTGCAACTCGACTGCGTGAAGTCGGAATCGCTAGTAATCGCGAATCAGAATG…
6	9.11XDG122-6-M13-	430	Proteobacteria	Betaproteobacteria				Burkholderiales bacterium	S000964299	0.957	AACGCGAAGAACCTTACCTACCCTTGACATGCTAGGAATCTTGCAGAGATGTGAGAGTGCTCGAAAGAGAACCTAGACACAGGTGCTGCATGGCCGTCGTCAGCTCGTGTCGTGAGATGTTGGGTTAAGTCCCGCAACGAGCGCAACCCTTGTCATTAGTTGCTACGAAAGGGCACACTAATGAGACTGCCGGTGACAAACCGGAGGAAGGTGGGGATGACGTCAGGTCCTCATGGCCCTTATGGGTAGGGCTACACACGTCATGCAATGGCCGGTACAGAGGGCTGCCAACCCGCGAGGGGGAGCCAATCCCAGAAAACCGGTCGTAGTCCGGATCGCAGTCTGCAACTCGACTGCGTGAAGTCGGAATCGCTAGTAATCGCGGATCAGCTTGCCGCG…
7	9.27XDG122-7-M13-	430	Proteobacteria	Betaproteobacteria				Burkholderiales bacterium	S000964299	0.971	AACGCGAAGAACCTTACCTACCCTTGACATGCTAGGAATCTTGCAGAGATGTGAGAGTGCTCGAAAGAGAACCTAGACACAGGTGCTGCATGGCCGTCGTCAGCTCATGTCGTGAGATGTTGGGTTAAGTCCCGCAACGAGCGCAACCCTTGTCATTAGTTGCTACGAAAGGGCACTCTAATGAGACTGCCGGTGACAAACCGGAGGAAGGTGGGGATGACGTCAGGTCCTCATGGCCCTTATGGGTAGGGCTACACACGTCATACAATGGCCGGTACAGAGGGCTGCCAACCCGCGAGGGGGAGCCAATCCCAGAAAACCGGTCGTAGTCCGGATCGCAGTCTGCAACTCGACTGCGTGAAGTCGGAATCGCTAGTAATCGCGGATCAGCTTGCCGCG…
8	10.11XDG122-8-M13-	431	Proteobacteria	Betaproteobacteria				uncultured soil bacterium	S000140303	0.864	AACGCGAAGAACCTTACCTACCCTTGACATGTCCGGAACCCGGCCGAGAGGTCGGGGTGCCCGAAAGGGAATCGGAACACAGGTGCTGCATGGCTGTCGTCAGCTCGTGTCGTGAGATGTTGGGTTAAGTCCCGCAACGAGCGCAACCCTTGTCCCTAGTTGCTACGCAAGGGCACCCTAGGGAGACTGCCGGTGACAAACCGGAGGAAGGTGGGGATGACGTCAAGTCCTCATGGCCCTTATGGGTAGGGCTTCACACGTCATACAATGGCCGGTACAGAGGGTTGCCAAGGCGCGAGCTGGAGCCAATCCCTGCAAAGCCGGTCGTAGTCCGGATTGCAGTCTGCAACTCGACTGCATGAAGTCGGAATCGCTAGTAATCGCGGATCAGCATGTCGC…
9	9.11XDG122-9-M13-	435	Proteobacteria	Gammaproteobacteria				Pseudomonas rhodesiae	S000013342	0.932	AACGCGAAGAACCTTACCAGGCCTTGACATCCAATGAACTTTCTAGAGATAGATTGGTGCCTTCGGGAACATTGAGACAGGTGCTGCATGGCTGTCGTCAGCTCGTGTCGTGAGATGTTGGGTTAAGTCCCGTAACGAGCGCAACCCTTGTCCTTAGTTACCAGCACGTAATGGTGGGCACTCTAAGGAGACTGCCGGTGACAAACCGGAGGAAGGTGGGGATGACGTCAAGTCATCATGGCCCTTACGGCCTGGGCTACACACGTGCTACAATGGTCGGCACAGAGGGTTGCCAAGCCGCGAGGTGGAGCTAATCCCATAAAACCGATCGTAGTCCGGATCGCAGTATGCAACTCGACTGCGTGAAGTAGGAATCGCTAGTAATCGCGAATCAGAATG…
10	10.21XDG122-10-M13-	430	Proteobacteria	Betaproteobacteria				uncultured bacterium	S000340714	0.903	AACGCGAAGAACCTTACCTACCCTTGACATGTACGGAAGCCCGCTGAGAGGCGGGTGTGCCCGAAAGGGAGCCGTAACACAGGTGCTGCATGGCTGTCGTCAGCTCGTGTCGTGAGATGTTGGGTTAAGTCCCGCAACGAGCGCAACCCTTGTCACTAGTTGCTACGCAAGGGCACTCTAGTGAGACTGCCGGTGACAAACCGGAGGAAGGTGGGGATGACGTCAAGTCCTCATGGCCCTTATGGGTAGGGCTTCACACGTCATACAATGGCGCATACAGAGGGCTGCCAACCCGCGAGGGGGAGCCAATCCCAGAAAGTGCGTCGTAGTCCGGATTGTTCTCTGCAACTCGAGAGCATGAAGTCGGAATCGCTAGTAATCGCGGATCAGCATGTCGCG…
11	10.15XDG122-11-M13-	434	Proteobacteria	Betaproteobacteria				uncultured bacterium	S003694170	0.828	AACGCGAAGAACCTTACCTGGTCTTGACATCCCGGGAACCTCGCAGAGATGTGAGGGTGCCTTCGGGAACCCGGAGACAGGTGCTGCATGGCTGTCGTCAGCTCGTGTCGTGAGATGTTGGGTTAAGTCCCGCAACGAGCGCAACCCTTGTCCGTAGTTGCCATCATTCAGTTGGGCACTCTACGGAGACCGCCGGTGACAAATCGGAGGAAGGTGGGGACGACGTCAAGTCATCATGGCCCTTATGACCAGGGCTACACACGTGCTACAATGGCCAGTACAGAGGGTTGCCAACCCGCGAGGGGGATCTAATCCCAGAAAGCTGGTCGTAGTCCAGATCGGAGTCTGCAACTCGACTCCATGAAGTCGGAATCGCTAGTAATCGCGGATCAGCAATGC…
12	10.25XDG122-12-M13-	432	Actinobacteria	Actinobacteria				Nocardioides sp	S000100676	0.857	AACGCGAAGAACCTTACCTGGGTTTGACATACACCGGAAAGCATCAGAGATGGTGCCCCTTTTCGTCGGTGTACAGGTGGTGCATGGCTGTCGTCAGCTCGTGTCGTGAGATGTTGGGTTAAGTCCCGCAACGAGCGCAACCCTCGTCCTATGTTGCCAGCGGGTAATGCCGGGGACTCATAGGAGACTGCCGGGGTCAACTCGGAGGAAGGTGGGGATGAGGTCAAGTCATCATGCCCCTTATGTCCAGGGCTTCACGCATGCTACAATGGCCGGTACAAAGGGGTGCGATCCCGTAAGGGGGAGCGAATCCCAAAAAGCCGGTCTCAGTTCGGATTGGGGTCTGCAACTCGACCCCATGAAGTCGGAGTCGCTAGTAATCGCAGATCAGCAACGCTG…
13	10.11XDG122-13-M13-	435	Actinobacteria	Actinobacteria				uncultured bacterium	S000976324	0.866	AACGCGAAGAACCTTACCAGGGCTTGACATGGTCGGGAAAACCGTAGAAATACGGTCCTCCTTCGGGACTCGATCACAGGTGGTGCATGGCTGTCGTCAGCTCGTGTCGTGAGATGTCGGGTTAAGTCCCGCAACGAGCGCAACCCCTGTCCCATGTTGCCAGCGAGTCATGTCGGGGACTCATGGGAGACTGCCGGTGACAAATCGGAGGAAGGTGGGGATGATGTCAAGTCATCATGCCCCTTATGTCCTGGGCTACACACGTGCTACATTGGCCGGTACAAAGGGCTGCAAACCCGCGAGGGTGAGCGAATCCCAAAAAGCCGGTCCCGGTTCGGATTGAAGGCTGAAACTCGCCTTCATGAAGGCGGAGTTGCTAGTAATCGCGGATCAGCAACG…
14	9.27XDG122-14-M13-	433	Acidobacteria	Acidobacteria				uncultured Acidobacteriales bacterium	S001174372	0.933	AACGCGAAGAACCTTACCCAGGCTTGAACAGCGAGTCACATCCGGCGAAAGTCGGCTCCCGCAAGGGGACTCGTAGAGGTGCTGCATGGCTGTCGTCAGCTCGTGTCGTGAGATGTTGGGTTAAGTCCCGCAACGAGCGCAACCCTTGTCCTCTGTTGCCATCAGGTTATGCTGGGCACTCTGAGGAGACTGCCGGTGATAAACCGGAGGAAGGTGGGGATGACGTCAAGTCAGCATGGCCTTTATGTCTGGGGCTACACACGTGCTACAATGGCCGGTACAAACCGTCGCGATGCCGTAAGGTGGAGCTAATCGGAGAAAGCCGGTCTCAGTTCGGATTGCAGGCTGCAACTCGCCTGCATGAAGTTGGAATCGCTAGTAATCGCGGATCAGCACGCC…
15	10.11XDG122-15-M13-	435	Proteobacteria	Gammaproteobacteria				Pseudomonas fluorescens	S000002169	0.967	AACGCGAAGAACCTTACCAGGCCTTGACATCCAATGAACTTTCTAGAGATAGATTGGTGCCTTCGGGAACATTGAGACAGGTGCTGCATGGCTGTCGTCAGCTCGTGTCGTGAGATGTTGGGTTAAGTCCCGTAACGAGCGCAACCCTTGTCCTTAGTTACCAGCACGTAATGGTGGGCACTCTAAGGAGACTGCCGGTGACAAACCGGAGGAAGGTGGGAATGACGTCAAGTCATCATGGCCCTTACGGCCTGGGCTACACACGTGCTACAATGGTCGGTACAGAGGGTTGCCAAGCCGCGAGGTGGAGCTAATCCCACAAAACCGATCGTAGTCCGGATCGCAGTCTGCAACTCGACTGCGTGAAGTCGGAATCGCTAGTAATCGCGAATCAGAATG…
16	10.15XDG122-16-M13-	436	Proteobacteria	Deltaproteobacteria				uncultured bacterium	S000377233	0.972	AACGCGAAGAACCTTACCAGGGCTTGACATGGTAGGAAGCTTTCGGAAACGAGAGTGTGCCCGCAAGGGAGCCTACACACAGGTGGTGCATGGCTGTCGTCAGCTCGTGTCGTGAGATGTTGGGTTAAGTCCCGCAACGAGCGCAACCCCCGTTGTTAGTTGCCATCAGGTAAAGCTGGGCACTCTAGCGAGACTGCCGGTGACAAACCGGAGGAAGGTGGGGACGACGTCAAGTCATCATGCCCCTTATGCCCTGGGCTACACACGTGTTACAATGGCTGGGACAATGTGATGCAATCCCGTGAGGGGGAGCGAACCACGAAACCCAGTCTCAGTTCAGATCGCAGGCTGCAACTCGCCTGCGTGAAGTCGGAATCGCTAGTAACCGCCGATCAGCAC…

## Sheet: Sheet2
DGGE_band_code	Taxonomy
1	Pseudomonas lurida
2	uncultured Cellulosilyticum sp
3	Legionella feeleii
4	Pseudomonas fluorescens
5	Pseudomonas sp
6	Burkholderiales bacterium
7	Burkholderiales bacterium
8	uncultured soil bacterium
9	Pseudomonas rhodesiae
10	uncultured bacterium
11	uncultured bacterium
12	Nocardioides sp
13	uncultured bacterium
14	uncultured Acidobacteriales bacterium
15	Pseudomonas fluorescens
16	uncultured bacterium
