# Supplementary material for: Bt-modified transgenic rice shifted the composition and diversity of rhizosphere microbiota
Source: Preprints.org preprint supplement (doi:10.20944/preprints202402.1379.v1), 2024-02-23
Supplement: Supplementary file 3 [file Table S11.xlsx]

## Sheet: S11
Table S11 Soil chemical properties measured in different treatments and different sampling stages.
Treatment	Stage	pH	C.org.(g/kg)	TN (%)	TP (mg/kg)	TK (%)	AN (mg/100g)	AK (mg/kg)	AP (mg/kg)
CK	StageI	6.23±0.04d	18.55±15.86a	0.09±0.01b	247.56±5.68d	0.18±0.02b	6.69±0.66a	47.37±1.70c	129.55±2.76d
	StageV	6.57±0.06b	9.93±0.31a	0.14±0.01a	277.52±11.05c	0.30±0.01a	6.93±0.14a	49.90±1.64bc	182.83±6.64c
GM	StageI	6.82±0.02a	10.59±0.99a	0.07±0.01c	266.46±5.20c	0.19±0.03b	6.73±0.24a	47.03±2.40c	133.66±2.84d
	StageV	6.80±0.10a	10.52±0.26a	0.13±0.01a	329.27±4.82a	0.31±0.11a	6.60±0.15a	50.80±1.08b	232.07±8.19a
NonGM	StageI	6.36±0.01c	8.82±0.36a	0.06±0.01c	237.49±4.14d	0.18±0.01b	7.20±0.25a	35.27±1.80d	117.68±1.40e
	StageV	6.37±0.06c	9.53±0.26a	0.14±0.01a	294.67±4.38b	0.26±0.01ab	6.67±0.63a	55.87±2.15a	205.33±7.06b
Note:Within column the numbers followed by the same letter are not significantly different( Duncan's multiple range test, at 5% level). C.org., organic carbon; TN, total nitrogen; TP,total phosphorus; TK, total Potassium; AN, available nitrogen; AK, available potassium; AP, available phosphorus.
