# Supplementary material for: Bt-modified transgenic rice shifted the composition and diversity of rhizosphere microbiota
Source: Preprints.org preprint supplement (doi:10.20944/preprints202402.1379.v1), 2024-02-23
Supplement: Supplementary file 5 [file Table S2.xlsx]

## Sheet: S2
Table S2 Sequencing counts and description of all predicted OTUs.
OTU ID	S5T4	S1K1	S5K4	S4F4	S3F4	S5T3	S3T4	S1K3	S5F5	S2T4	S3F3	S4T4	S4K3	S5F2	S5F1	S5K5	S4K1	S2F5	S5K2	S3K5	S3K1	S5K1	S1K4	S2T2	S4F3	S4T3	S4K2	S5F3	S2F1	S1F3	S3K2	S1F4	S2K4	S1T2	S4K4	S2F3	S4F2	S4T2	S2F2	S5F4	S2K2	S1T4	S2K3	S2T5	S4F1	S3F5	S2T1	S3K4	S5K3
OTU_335	1	0	0	3	0	0	4	0	2	2	2	6	2	1	0	2	1	1	1	1	0	1	0	0	2	9	1	3	5	0	2	1	1	0	2	4	0	3	2	2	0	0	1	2	1	1	0	5	1
OTU_30	8	25	13	13	3	18	12	14	7	15	9	8	6	8	2	5	5	17	5	4	2	5	17	13	13	18	2	9	8	15	1	10	0	14	2	14	9	13	12	5	3	18	5	29	10	4	14	7	4
OTU_257	6	12	4	5	5	7	3	12	5	2	6	3	3	2	1	11	5	6	4	3	6	5	12	9	2	8	3	11	5	3	6	3	2	5	3	7	5	8	3	1	9	2	5	13	7	5	4	6	6
OTU_52	5	29	12	8	6	5	3	7	15	2	5	9	4	14	5	6	7	4	1	3	3	8	9	9	3	19	3	5	6	10	6	8	2	11	2	6	9	11	4	6	7	2	4	3	7	2	4	10	10
OTU_441	2	1	1	2	1	0	1	0	1	5	0	0	0	0	0	1	1	2	0	0	0	0	0	0	0	5	2	2	2	0	0	2	0	0	0	4	0	1	0	0	0	0	1	1	0	1	0	0	0
OTU_28	8	30	9	55	18	17	22	14	20	8	17	12	7	18	8	13	5	16	3	5	8	6	0	9	40	43	10	37	7	3	6	0	8	1	9	18	21	25	9	34	7	3	6	18	43	25	5	6	8
OTU_154	2	8	2	5	5	6	8	2	3	3	2	21	1	5	0	3	2	9	0	2	3	3	2	2	2	19	3	1	3	2	3	0	3	7	4	13	5	12	5	1	3	5	4	10	3	1	8	1	2
OTU_1026	0	0	0	0	1	0	1	1	1	0	0	0	0	0	0	0	0	0	0	0	0	0	0	0	0	11	0	0	0	0	0	0	0	0	0	0	0	0	0	0	0	0	0	0	0	0	0	0	0
OTU_11	9	40	16	25	16	14	13	19	26	10	12	26	16	23	13	9	30	19	6	12	20	14	10	21	27	23	6	22	15	13	14	4	22	0	10	23	7	18	26	24	24	1	14	34	25	11	15	19	18
OTU_29	20	40	15	42	13	25	15	12	14	16	9	13	8	15	14	20	11	16	6	6	9	6	14	21	31	29	10	38	15	14	11	11	5	14	17	21	26	15	18	16	9	23	9	29	22	6	18	6	12
OTU_59	22	21	14	17	16	13	10	15	15	9	12	18	25	9	7	10	18	14	7	7	5	6	12	14	12	29	11	20	34	17	20	16	6	6	17	14	6	13	27	9	5	6	7	22	23	10	12	10	15
OTU_9	24	46	55	41	26	22	10	26	59	17	27	16	29	53	26	52	32	25	23	59	56	28	20	26	43	38	20	50	64	25	30	20	23	35	23	31	35	35	92	41	41	35	40	38	20	23	23	30	15
OTU_199	7	18	11	8	10	11	8	17	13	9	8	13	7	19	5	7	12	6	5	6	8	9	6	4	12	13	5	14	10	5	3	11	3	5	5	7	8	6	8	11	2	4	12	6	8	5	4	14	12
OTU_326	5	5	2	2	1	4	4	0	1	0	7	2	0	1	1	2	1	3	0	0	1	0	0	3	6	13	0	2	1	0	0	0	1	0	0	3	3	12	1	0	1	0	0	1	1	7	0	4	1
OTU_1	104	215	181	161	123	160	103	185	218	123	187	97	104	186	70	144	145	180	62	106	182	95	164	111	175	265	108	162	146	130	110	102	138	139	109	167	119	163	165	170	195	126	89	194	143	141	109	159	133
OTU_279	2	13	8	9	1	5	1	1	2	1	1	0	6	1	1	7	6	0	2	0	7	3	2	1	2	5	3	4	0	2	0	1	1	1	3	3	3	2	1	0	2	3	1	2	0	0	0	4	2
OTU_3	44	70	62	160	35	53	30	4	91	16	32	54	19	56	32	60	24	21	13	15	18	14	17	12	122	74	13	124	11	8	4	8	7	20	27	46	69	116	21	53	13	22	11	30	55	38	7	29	19
OTU_372	2	2	3	4	0	5	1	2	1	0	1	1	0	1	0	8	1	0	0	0	0	5	0	0	2	2	0	0	0	1	1	3	1	0	0	1	3	0	1	1	0	0	0	0	0	0	0	0	1
OTU_1556	0	0	0	1	0	0	0	0	0	0	0	0	0	0	0	1	0	1	2	0	0	0	0	0	0	0	0	1	0	0	0	0	0	0	0	0	0	0	0	1	0	0	0	0	0	0	0	0	0
OTU_4	45	99	80	98	42	51	45	47	103	46	92	22	44	91	37	60	61	58	17	36	68	45	62	65	51	80	30	73	39	51	45	32	42	39	29	71	71	58	73	61	90	32	49	99	46	34	49	55	30
OTU_25	5	37	8	31	16	3	11	19	19	6	13	25	10	12	3	14	10	11	6	8	9	12	7	7	23	25	12	10	13	8	11	5	11	3	4	26	27	10	18	19	20	1	7	16	14	14	9	18	9
OTU_54	7	14	15	0	6	6	2	1	5	2	2	7	4	1	2	8	3	0	4	3	4	7	5	7	4	8	3	5	3	13	2	11	0	4	4	5	4	0	3	2	7	8	4	2	0	7	0	1	4
OTU_210	1	7	2	2	1	2	2	4	1	1	0	3	8	2	0	1	4	0	2	2	3	0	1	2	0	1	0	1	7	3	1	1	3	0	6	4	1	0	0	0	0	0	2	0	6	2	0	1	3
OTU_636	4	4	1	5	2	0	0	6	0	1	0	5	7	0	1	3	2	1	4	1	1	0	5	3	0	6	3	3	0	1	1	0	3	1	2	1	2	2	0	1	3	0	1	6	2	1	1	1	4
OTU_164	0	10	5	9	3	1	0	1	4	0	1	3	6	6	0	16	7	0	0	7	3	17	0	0	4	1	3	0	1	1	3	0	2	0	4	1	0	1	1	3	4	1	1	0	0	5	0	6	28
OTU_937	2	1	1	1	1	0	0	0	2	4	1	1	0	3	2	1	0	6	0	1	1	2	2	1	0	4	0	2	1	1	0	0	0	1	0	0	2	0	1	0	0	0	2	1	2	1	0	0	2
OTU_885	0	1	0	1	1	2	0	0	0	1	1	0	0	0	0	0	0	1	0	0	0	0	0	7	0	0	0	2	0	0	1	0	0	0	1	0	0	1	0	0	0	0	0	1	2	1	0	0	1
OTU_1859	0	0	2	1	0	1	0	0	1	0	0	0	1	0	0	0	0	0	0	0	1	1	0	0	2	1	2	0	1	0	0	0	0	0	1	0	0	2	0	0	0	0	0	1	0	1	0	0	1
OTU_22	8	9	9	18	14	14	2	3	24	4	14	3	19	20	3	9	13	2	3	11	26	15	2	2	9	9	13	20	5	1	9	1	7	0	4	9	10	8	5	9	7	0	2	2	12	21	1	20	13
OTU_177	2	7	7	4	3	4	0	6	12	2	1	13	17	13	3	25	10	2	0	6	2	6	7	7	6	11	9	9	0	11	4	6	17	0	6	0	0	4	0	7	10	2	20	2	1	3	0	6	10
OTU_103	17	67	59	38	24	29	27	43	51	22	31	34	40	73	27	33	33	37	20	25	39	39	43	36	47	44	23	37	53	27	22	32	55	9	13	65	41	33	70	35	36	17	23	42	24	24	34	62	32
OTU_398	5	6	8	6	4	0	2	6	1	3	2	1	1	4	2	6	1	3	0	2	0	6	2	0	6	3	0	8	1	0	3	3	2	2	6	0	1	5	4	2	1	1	1	2	5	1	1	0	1
OTU_303	6	20	0	14	18	2	5	19	2	9	7	7	5	7	1	5	9	18	6	8	9	5	21	13	11	10	2	12	35	9	9	8	5	2	5	7	8	12	9	3	5	5	3	7	4	6	5	7	2
OTU_757	1	1	0	0	0	0	0	1	1	0	0	1	0	1	0	1	0	0	0	1	1	1	0	0	1	1	1	1	0	4	2	2	2	0	0	0	0	1	0	2	2	0	4	0	0	0	0	4	0
OTU_312	7	24	11	6	15	3	8	19	14	4	4	2	7	13	7	5	12	2	5	8	8	9	8	7	12	8	18	6	9	14	5	9	11	4	4	20	14	5	9	17	14	1	11	7	0	9	2	10	4
OTU_94	22	15	22	22	6	11	7	6	15	9	4	10	3	13	7	13	6	5	4	2	1	12	0	6	22	21	8	20	5	6	5	4	2	0	2	8	23	10	1	20	2	2	5	3	10	4	3	9	7
OTU_264	1	6	5	5	0	2	3	1	2	0	0	3	1	3	1	1	0	1	0	2	0	0	1	0	2	4	2	0	2	3	3	1	0	0	0	0	3	3	1	1	1	0	1	0	0	1	0	2	2
OTU_37	10	16	11	11	5	16	4	25	3	4	9	15	10	10	2	7	1	10	4	7	10	5	12	29	8	8	7	15	11	11	3	6	2	0	2	13	11	3	10	13	6	2	6	14	8	2	6	1	9
OTU_683	1	1	0	0	3	1	1	0	2	0	1	0	0	0	0	4	1	0	0	2	0	1	0	0	1	1	0	2	0	9	1	4	1	0	0	0	0	0	0	0	2	0	0	0	0	0	0	1	1
OTU_2127	1	0	0	0	0	0	0	0	0	0	0	0	0	1	0	0	0	0	0	0	0	0	0	1	0	0	0	0	0	0	0	0	0	1	0	0	0	0	0	0	0	0	0	0	0	0	0	0	0
OTU_42	3	117	38	10	3	6	3	0	7	2	1	22	2	2	2	4	10	0	0	0	2	2	0	10	14	9	0	2	3	0	5	0	2	1	1	9	17	6	0	3	2	0	4	4	0	2	0	5	2
OTU_986	0	0	0	0	0	0	0	0	0	0	0	0	0	0	0	0	0	0	0	0	0	1	0	0	0	0	1	0	0	0	0	0	0	0	5	0	0	0	0	0	0	0	0	0	0	0	0	0	3
OTU_57	10	10	7	3	4	7	3	4	5	9	3	5	6	5	3	10	7	10	3	4	2	11	9	6	7	7	7	13	1	7	12	10	2	4	4	6	2	5	11	7	3	4	5	4	3	3	0	2	12
OTU_51	12	39	15	11	34	9	5	11	28	84	11	20	9	11	5	20	10	10	2	7	19	9	14	7	17	40	14	7	8	8	6	11	5	22	2	21	13	14	8	13	14	12	4	26	11	27	5	5	8
OTU_36	21	73	37	24	17	27	24	29	37	17	24	34	29	39	19	27	20	20	9	23	23	30	39	33	26	28	22	35	20	27	34	33	19	20	28	31	16	25	34	25	30	42	10	41	20	17	14	22	39
OTU_44	8	12	6	43	9	16	20	3	15	11	7	21	6	14	7	3	10	12	2	12	2	3	6	6	32	24	3	13	6	5	2	4	2	6	6	17	31	28	5	16	8	5	1	14	16	7	9	7	9
OTU_87	9	24	24	7	10	2	7	13	5	8	4	19	14	12	10	12	7	9	4	15	9	12	20	5	7	10	21	13	8	7	6	5	8	7	13	7	4	14	8	8	8	10	17	3	5	9	3	6	28
OTU_728	0	0	0	1	0	2	1	2	0	0	0	1	0	1	1	0	0	0	0	0	0	0	1	2	0	1	0	1	1	1	0	1	0	5	0	1	1	0	0	2	0	2	0	1	2	0	1	1	1
OTU_332	1	4	8	3	3	1	1	5	1	1	3	3	5	3	1	3	1	1	1	0	5	2	1	0	1	7	3	0	2	0	6	1	0	0	2	0	3	3	3	1	0	0	2	1	5	3	0	7	3
OTU_952	3	7	8	2	1	0	0	0	6	1	2	4	3	4	1	5	5	0	1	1	0	4	5	0	2	3	6	1	4	3	3	0	0	1	3	2	4	3	1	4	2	0	2	2	1	0	0	4	2
OTU_106	5	20	2	26	5	6	15	4	6	7	12	16	5	14	2	6	4	6	4	9	8	0	2	4	12	19	3	20	7	5	6	1	0	12	0	20	17	22	6	5	5	2	2	22	7	5	3	3	3
OTU_1100	0	0	0	0	0	0	0	1	0	0	0	0	0	0	0	0	0	0	1	0	0	0	0	0	0	0	0	1	0	0	1	1	0	0	0	2	1	0	0	0	5	0	0	1	0	0	0	0	0
OTU_647	0	2	0	2	1	3	0	0	1	0	0	2	0	0	1	1	0	1	0	1	0	0	1	0	3	0	1	4	2	0	0	0	0	0	0	0	10	1	0	3	1	0	0	1	0	0	0	0	0
OTU_512	20	67	108	34	23	25	24	45	84	26	23	18	78	64	40	92	65	28	27	49	62	45	43	27	31	49	30	51	33	21	65	30	40	40	53	38	26	36	59	42	53	28	55	36	11	20	25	53	63
OTU_308	5	2	2	3	1	0	2	0	0	3	2	3	0	1	1	1	0	1	0	0	0	0	2	1	1	0	0	4	0	4	0	0	3	1	1	1	0	3	0	1	1	4	0	1	1	0	0	2	0
OTU_643	0	1	0	0	0	0	0	1	18	0	0	0	0	0	0	0	0	0	0	0	0	0	0	0	0	0	1	0	0	0	0	0	0	0	0	0	0	0	0	1	0	0	0	0	0	0	0	0	1
OTU_299	10	9	15	6	1	16	4	0	20	2	10	12	3	12	5	3	1	2	3	1	2	4	2	1	4	6	3	13	1	0	1	1	0	1	3	4	5	7	6	8	3	1	2	2	4	1	3	2	15
OTU_217	1	12	1	3	1	1	4	6	1	6	5	6	2	2	1	0	1	2	2	0	3	3	4	9	1	2	1	3	6	3	0	4	1	2	4	5	4	4	5	1	1	4	1	5	8	1	2	6	0
OTU_66	14	22	12	28	19	24	11	9	8	20	12	28	10	8	8	8	16	17	6	6	13	8	6	13	19	45	7	12	13	5	7	9	6	12	13	35	14	26	12	13	13	9	6	21	23	15	13	8	12
OTU_2282	0	6	2	0	0	0	0	0	0	0	0	2	1	2	0	0	0	0	0	1	0	0	1	0	0	0	2	0	1	0	1	1	0	2	1	0	0	0	0	0	0	0	1	0	0	0	0	0	1
OTU_2	57	137	182	61	45	48	30	84	78	54	39	49	66	104	43	133	78	39	61	47	76	138	59	94	46	86	38	66	54	87	52	76	48	50	70	53	56	49	45	67	67	49	45	65	50	40	34	68	90
OTU_170	7	26	16	11	6	12	6	5	15	11	7	14	34	11	5	19	21	9	5	17	14	29	8	7	6	29	19	7	6	10	17	8	22	5	25	17	7	8	8	8	19	4	13	10	12	8	9	22	28
OTU_2157	2	1	0	0	1	0	0	0	0	0	0	0	0	1	0	1	0	0	0	0	1	0	1	0	1	4	0	0	0	0	0	0	1	2	0	1	0	2	1	1	0	1	1	1	0	1	0	0	0
OTU_527	2	4	8	4	0	1	1	2	2	2	1	5	11	2	1	1	0	0	1	2	2	1	3	1	4	5	0	1	0	2	6	0	1	0	1	4	1	0	1	1	2	0	1	4	2	0	0	0	3
OTU_1625	0	0	0	0	1	0	0	0	1	0	0	0	0	0	0	0	0	1	0	0	0	0	0	1	1	1	0	0	0	0	1	0	0	1	0	0	1	0	0	0	0	1	0	0	0	0	2	0	0
OTU_1409	0	0	0	0	0	0	0	0	0	0	0	0	0	0	0	0	0	0	0	0	0	0	0	0	0	0	0	0	0	0	0	0	0	0	0	0	0	0	0	0	0	0	0	0	0	0	6	0	0
OTU_1555	0	1	1	1	0	0	0	1	0	0	0	0	1	1	0	2	2	0	0	0	0	2	0	0	1	0	0	1	0	0	2	1	0	0	0	1	2	0	0	1	1	1	1	0	0	0	0	0	0
OTU_649	1	5	0	1	1	1	0	1	2	1	0	0	2	1	0	0	0	2	0	1	0	0	2	4	1	0	1	2	0	6	2	5	2	5	0	2	0	1	0	0	2	1	1	1	0	2	0	1	1
OTU_301	1	4	8	2	0	5	1	1	0	1	1	1	1	1	0	0	2	0	0	0	1	1	1	0	3	2	0	1	0	1	0	2	0	1	0	0	4	4	0	0	0	2	0	0	1	6	0	3	0
OTU_503	1	8	5	6	3	2	0	1	3	0	0	4	0	10	3	5	1	2	0	0	3	3	1	1	4	2	5	9	0	1	0	1	0	0	4	0	3	0	1	3	3	1	0	0	5	2	0	2	5
OTU_38	46	78	79	61	50	44	46	53	90	30	41	43	43	74	24	58	47	25	22	29	52	48	38	37	43	86	26	71	41	36	47	23	31	41	19	66	42	35	71	69	71	48	42	61	39	53	30	50	36
OTU_13	6	18	28	11	4	5	6	17	16	1	10	6	17	18	11	20	17	8	6	18	19	11	8	5	10	13	6	9	6	8	23	7	11	5	14	6	12	4	6	10	17	0	19	5	10	5	2	15	19
OTU_229	0	10	8	0	0	0	0	13	0	1	1	0	4	1	0	9	2	0	5	3	0	7	2	0	0	0	3	1	0	0	4	0	1	0	1	0	0	0	1	1	1	0	1	0	1	1	1	1	10
OTU_5	14	101	163	14	22	24	7	84	75	15	17	9	86	94	32	143	60	19	46	50	48	142	28	15	5	22	31	23	35	48	36	28	41	6	69	32	13	8	24	27	65	21	43	11	6	22	4	67	116
OTU_1442	0	0	1	0	0	0	1	0	0	0	0	0	0	0	0	0	0	0	0	0	0	0	0	0	0	0	0	0	0	0	0	0	0	0	0	1	0	0	0	0	0	0	0	0	0	1	0	0	0
OTU_104	0	8	5	5	2	4	0	4	8	1	2	0	9	6	5	3	2	0	1	3	2	0	1	1	1	2	2	12	0	0	7	0	1	0	3	3	6	1	2	11	9	0	2	3	1	2	0	5	5
OTU_80	4	9	18	2	0	6	2	9	5	5	2	4	9	8	1	14	9	10	4	8	5	8	6	3	7	10	3	5	7	7	6	6	7	0	1	6	6	3	5	5	6	6	7	5	6	2	3	9	5
OTU_499	1	0	10	0	0	0	0	0	1	1	0	2	0	0	0	0	0	0	1	1	0	0	0	0	1	0	2	0	0	0	0	0	0	0	4	2	1	0	1	1	0	0	0	0	0	0	0	1	0
OTU_50	11	59	9	14	11	22	12	16	14	15	17	23	9	13	10	8	10	14	0	10	15	13	20	17	24	22	5	14	4	17	11	15	11	21	8	15	9	21	10	10	8	13	6	10	17	9	5	19	14
OTU_162	2	8	4	6	2	3	0	6	8	2	6	2	8	7	1	9	3	2	4	2	6	7	4	3	3	8	0	4	4	5	5	3	5	1	9	8	2	8	5	5	11	0	3	2	9	4	0	4	11
OTU_536	3	2	1	4	0	3	2	2	1	2	2	3	1	2	3	3	0	1	1	0	1	0	2	0	2	3	0	4	0	0	1	0	0	2	0	3	2	4	1	3	3	0	1	1	2	1	0	0	2
OTU_407	0	0	1	4	0	0	0	0	0	0	0	1	0	9	0	0	0	0	0	0	0	0	1	2	5	4	1	1	0	0	0	1	0	1	0	1	2	0	0	2	0	0	0	0	0	0	0	0	0
OTU_8	49	75	30	71	26	45	23	35	40	50	48	41	35	38	22	30	34	34	19	30	28	46	48	44	50	77	21	58	23	43	23	32	22	37	18	64	38	56	38	36	25	53	13	44	47	25	58	25	30
OTU_2338	0	0	0	0	0	0	0	0	0	0	0	0	0	0	0	0	0	0	0	0	0	0	0	0	0	0	0	0	0	0	0	0	0	0	0	0	0	0	0	0	0	0	0	0	0	0	0	0	0
OTU_311	3	6	3	4	4	2	4	2	2	9	3	6	2	6	2	6	1	0	0	2	2	3	3	12	12	4	3	4	2	6	4	4	3	2	6	4	3	2	2	1	3	2	2	10	4	1	2	7	4
OTU_253	4	6	3	4	0	3	0	0	0	0	2	0	0	2	0	0	0	2	0	0	0	0	3	4	1	10	0	5	0	0	0	0	0	0	3	0	4	1	0	2	1	0	0	1	1	1	0	0	2
OTU_238	0	2	2	0	0	1	0	3	2	0	0	1	2	2	0	3	1	3	1	2	1	1	2	5	1	2	1	0	0	0	0	3	1	0	0	1	1	0	1	1	6	1	2	0	0	0	0	2	0
OTU_147	1	3	2	9	4	6	4	3	5	2	4	14	6	3	2	3	4	1	5	5	6	5	0	0	5	7	4	4	0	2	3	0	2	3	1	1	1	5	6	4	6	1	2	4	5	2	3	3	5
OTU_15	17	28	46	15	8	20	6	20	16	16	16	24	22	44	14	34	19	16	23	13	10	38	27	23	10	27	10	26	16	33	9	41	4	27	21	14	14	16	11	16	17	11	15	21	11	8	15	17	31
OTU_551	4	17	7	8	7	1	2	6	9	0	7	3	11	9	2	19	11	3	4	8	10	14	5	1	5	4	5	5	11	2	12	2	5	0	10	18	17	1	35	4	10	0	6	0	3	5	3	18	7
OTU_136	5	19	6	6	4	4	1	8	14	1	4	13	8	8	3	12	10	5	1	5	6	8	1	5	3	10	6	3	6	7	8	3	7	1	8	11	7	10	8	5	7	6	2	3	3	8	7	7	11
OTU_79	9	10	1	12	4	13	5	1	8	1	3	7	0	4	2	2	4	1	1	1	0	3	3	2	16	13	2	12	2	3	0	1	0	5	2	3	10	8	2	21	4	5	1	2	13	4	2	4	6
OTU_298	1	1	0	0	0	0	0	9	1	0	0	1	1	1	0	3	0	0	0	1	1	2	0	0	0	0	0	13	1	1	0	0	3	0	2	2	0	0	0	0	0	0	2	0	0	0	0	3	4
OTU_724	1	25	14	2	5	6	4	5	2	4	2	11	3	5	0	3	5	4	3	1	4	7	5	12	5	5	11	5	6	4	6	2	4	0	5	4	12	2	2	0	5	1	13	8	3	4	3	0	8
OTU_567	1	2	6	1	2	2	4	3	2	0	0	1	1	2	0	0	0	0	0	0	2	3	2	4	0	4	2	2	3	0	0	0	3	7	1	6	0	8	1	0	0	1	0	5	0	0	3	1	1
OTU_549	0	0	2	1	0	0	0	0	1	1	0	1	2	2	1	0	0	1	0	0	0	3	1	0	0	2	1	0	2	0	1	0	3	0	0	1	0	0	0	1	1	0	0	0	0	1	0	0	2
OTU_274	2	21	5	7	7	1	7	4	5	3	2	6	6	6	2	2	2	3	0	3	3	0	1	5	20	9	2	4	6	4	3	5	1	0	4	6	3	1	5	1	8	1	5	4	3	3	2	4	0
OTU_70	26	26	27	29	13	14	12	18	17	4	6	31	10	15	14	12	8	5	11	10	8	15	6	12	13	24	15	15	17	7	10	2	1	4	19	13	30	11	14	14	9	4	20	5	10	9	6	6	10
OTU_212	0	4	2	2	0	0	1	1	0	0	1	5	1	2	2	3	0	0	2	2	0	4	1	0	10	4	3	0	3	0	1	0	0	0	2	1	1	0	1	3	0	0	1	0	1	2	0	1	1
OTU_798	0	3	1	0	0	0	0	4	0	0	0	0	1	0	0	3	0	0	0	1	1	1	0	0	0	0	1	0	0	0	0	0	0	0	0	1	0	0	1	0	0	0	0	0	0	0	0	1	3
OTU_1071	0	1	0	0	0	0	0	0	0	0	0	0	0	1	0	2	0	0	0	0	0	0	0	0	0	1	0	1	0	2	0	0	0	0	0	0	0	1	2	1	0	0	0	0	0	0	0	0	0
OTU_129	0	4	4	6	8	2	1	3	5	5	4	0	3	3	1	4	10	7	1	2	5	4	0	3	2	5	5	5	5	3	2	3	3	0	2	4	4	0	6	0	14	0	4	2	1	10	0	9	1
OTU_1325	0	2	0	2	0	3	0	0	0	0	0	0	0	0	1	0	0	0	0	0	0	0	1	0	0	2	3	0	0	0	0	0	0	0	2	0	0	0	0	0	0	0	0	0	0	0	0	0	0
OTU_351	7	6	8	3	0	1	2	0	2	1	1	7	0	1	2	1	0	1	0	2	1	4	1	2	9	5	4	5	1	2	1	2	0	2	1	2	5	2	0	3	1	0	0	2	0	3	1	1	0
OTU_455	1	3	4	11	2	0	0	1	2	0	2	3	0	6	3	2	4	0	1	1	1	3	0	0	0	3	2	5	4	0	0	1	2	0	1	1	7	0	2	2	0	0	0	1	3	0	0	3	2
OTU_349	3	5	2	1	0	2	0	2	4	3	1	2	2	4	1	3	2	1	1	1	2	4	0	5	0	2	1	3	1	0	0	0	1	0	3	2	0	5	0	1	3	2	1	0	0	2	1	1	1
OTU_127	3	8	2	6	1	7	2	3	6	1	4	5	0	1	1	0	2	4	1	2	1	3	0	0	2	15	5	4	9	2	4	0	2	1	5	3	4	5	5	4	2	1	1	16	4	1	11	1	1
OTU_23	2	14	43	2	0	2	1	8	6	3	8	1	16	13	4	37	9	2	14	14	11	26	9	6	2	2	6	4	1	4	20	9	6	9	13	3	3	4	4	6	4	14	15	4	5	1	0	12	32
OTU_58	10	61	28	43	3	11	12	25	22	9	6	17	20	20	4	26	42	15	7	16	17	16	0	7	14	13	4	19	33	3	11	6	4	0	19	17	26	16	25	20	16	10	2	6	22	10	11	14	15
OTU_208	2	3	1	13	1	3	2	2	2	2	2	3	1	4	0	3	1	2	1	1	1	0	2	6	4	6	0	1	2	4	2	2	1	5	0	1	2	5	1	2	2	1	0	4	2	0	1	2	1
OTU_6	10	45	42	100	21	33	25	16	45	5	21	22	30	33	11	45	37	12	19	24	25	22	2	2	66	38	23	62	17	6	14	1	11	5	23	48	43	38	25	50	16	6	14	5	36	36	3	40	26
OTU_1544	0	0	0	2	0	2	0	0	0	0	0	0	1	0	0	0	0	0	0	0	0	0	0	0	1	1	0	1	0	0	0	0	0	0	0	0	1	0	0	0	0	0	0	0	0	0	0	0	0
OTU_211	2	2	1	3	0	3	0	0	3	0	1	5	1	3	0	2	4	1	0	2	4	8	0	0	3	4	2	0	1	0	2	0	1	2	4	6	2	2	3	2	6	4	3	0	0	2	0	5	5
OTU_1814	0	0	0	0	0	0	0	0	0	0	0	0	0	0	0	0	1	0	0	0	0	0	0	0	0	0	0	0	0	0	0	0	0	0	0	0	0	0	0	0	0	0	0	0	0	1	0	1	0
OTU_315	2	4	1	5	0	2	2	7	2	5	3	1	6	3	2	0	0	3	1	7	1	2	1	1	4	3	0	3	0	0	3	0	9	0	1	2	1	3	1	4	1	1	3	5	3	2	1	2	3
OTU_405	0	3	0	2	2	0	2	0	1	0	0	5	3	1	0	0	2	0	2	0	4	0	1	1	4	6	1	1	0	1	2	0	0	1	1	3	2	3	1	0	2	0	1	0	1	1	0	1	1
OTU_107	5	6	6	6	2	4	3	4	11	3	1	8	1	7	3	5	0	2	1	1	2	3	0	2	4	9	4	8	2	2	0	0	0	0	0	2	6	6	4	3	2	1	0	5	1	2	1	1	2
OTU_16	9	47	20	53	20	29	13	5	22	14	6	26	7	20	5	12	22	15	7	14	16	10	11	34	47	33	24	29	10	9	11	2	3	7	13	30	34	39	16	24	16	9	10	25	20	28	4	31	12
OTU_951	1	0	5	0	1	3	0	0	0	0	0	0	0	0	0	2	0	0	0	0	0	1	0	0	0	0	0	0	0	0	0	0	0	0	0	0	0	1	0	0	0	0	0	0	0	2	0	0	1
OTU_76	1	12	6	16	1	13	1	9	6	4	1	3	3	5	2	1	1	11	2	4	3	3	1	7	7	4	4	10	6	3	4	6	0	0	0	7	13	8	3	2	11	6	4	5	12	2	3	6	5
OTU_263	4	20	17	25	32	15	8	14	22	36	8	13	10	16	10	19	18	7	2	11	18	6	12	11	17	32	7	20	15	8	6	8	4	24	1	31	9	17	12	9	20	24	10	18	4	27	6	10	16
OTU_61	7	12	19	2	4	3	2	7	1	4	1	1	8	6	7	9	8	0	6	3	3	19	5	3	4	6	9	3	1	16	8	4	7	31	18	6	4	3	2	4	10	21	10	1	1	4	9	9	9
OTU_1081	0	2	4	2	2	3	2	2	1	1	0	1	1	5	0	2	5	1	0	3	3	4	0	0	1	1	2	0	2	1	2	0	0	3	3	2	0	1	4	1	1	0	0	0	4	0	2	0	0
OTU_1893	0	1	1	0	0	0	0	0	0	1	0	0	0	0	0	1	0	0	0	0	0	0	0	0	0	2	0	0	0	0	0	0	0	0	0	1	0	0	0	0	0	1	0	0	0	0	0	0	2
OTU_126	0	5	4	3	3	0	0	4	4	4	1	0	4	4	3	7	5	0	0	4	7	1	1	0	3	1	10	3	2	1	6	1	1	0	7	4	7	0	10	2	10	0	7	0	0	1	0	4	9
OTU_74	7	21	13	21	7	2	5	9	13	1	2	10	11	8	3	13	29	2	5	10	14	11	2	1	16	25	22	9	9	3	9	0	6	6	12	9	15	7	21	16	22	5	4	2	28	4	0	18	9
OTU_396	2	1	3	2	2	0	3	0	1	0	3	4	1	1	1	2	2	2	0	3	3	1	3	1	1	4	1	1	0	1	1	2	1	0	1	6	1	1	3	0	1	1	0	3	2	2	0	2	0
OTU_729	0	1	0	1	1	0	0	0	0	0	0	2	1	0	0	0	1	1	0	0	1	0	0	0	3	0	0	0	0	0	2	0	0	0	0	0	0	0	0	0	0	0	0	0	0	0	0	0	0
OTU_258	2	11	5	3	1	4	0	7	4	2	0	10	3	3	6	11	0	1	8	1	2	9	4	2	1	8	5	5	1	2	3	0	3	3	2	1	2	3	0	11	8	4	5	1	2	4	1	1	14
OTU_2124	0	0	0	0	0	0	0	0	0	1	0	0	0	1	0	0	0	0	0	0	0	0	0	0	0	0	0	0	0	0	0	0	0	0	0	0	1	0	0	0	0	0	0	0	1	0	0	0	0
OTU_848	0	1	0	0	1	1	0	0	0	0	1	2	1	3	1	1	0	0	0	1	0	0	0	0	1	2	2	3	3	0	0	0	0	0	0	0	0	0	0	0	0	0	0	0	1	2	1	0	0
OTU_24	3	28	10	11	2	9	9	12	10	1	4	10	6	9	4	16	9	4	8	4	12	18	17	4	21	18	5	14	12	3	14	8	9	8	3	9	7	8	13	6	4	11	12	5	11	7	14	12	4
OTU_414	2	5	1	3	1	3	0	1	1	1	2	1	1	1	0	1	2	1	1	0	0	0	0	0	3	3	2	1	0	0	0	0	1	1	1	1	4	0	0	0	0	0	0	2	1	5	0	0	0
OTU_419	0	2	1	0	7	0	0	2	2	3	1	0	1	2	2	1	2	4	1	3	3	2	2	1	3	2	0	0	1	1	2	1	4	0	2	2	3	0	2	3	0	0	4	1	2	4	3	3	6
OTU_10	16	21	41	23	11	21	20	18	24	12	24	10	11	29	15	21	20	18	13	18	46	27	25	17	18	22	11	26	13	11	32	11	15	22	23	14	18	20	23	26	42	17	13	18	15	12	16	23	36
OTU_93	23	28	29	29	39	16	26	22	43	31	20	27	17	38	16	21	17	32	10	19	22	14	37	25	27	51	7	43	28	28	28	20	17	24	11	42	21	26	59	28	28	9	17	22	25	9	22	12	20
OTU_82	3	13	4	6	2	4	5	11	3	3	5	1	3	5	1	2	4	0	1	3	3	4	10	1	8	11	1	7	2	4	1	2	5	7	4	1	8	15	2	1	1	1	9	5	1	3	3	5	5
OTU_266	4	2	1	6	0	3	2	2	4	1	1	6	1	1	0	2	4	0	1	0	0	0	3	0	8	4	0	7	0	1	3	1	1	2	0	2	6	6	2	1	0	6	0	3	4	0	2	1	0
OTU_778	1	2	2	2	2	0	0	0	0	0	1	0	2	0	0	1	1	2	0	0	5	2	0	2	1	1	0	0	4	2	0	0	0	3	0	1	0	2	1	1	0	2	1	0	2	2	0	0	1
OTU_502	2	1	2	1	0	7	1	0	0	2	0	3	0	0	0	1	0	0	0	0	0	0	0	1	3	10	0	1	0	0	1	0	0	3	0	0	1	5	0	0	0	0	0	2	0	0	0	1	0
OTU_1774	0	0	0	0	0	0	0	0	0	0	0	0	0	0	0	0	0	0	0	0	0	0	0	0	0	0	0	0	0	0	0	0	0	0	0	0	0	0	0	0	0	0	0	0	0	0	0	0	0
OTU_931	0	3	3	5	1	1	1	0	3	0	0	1	0	1	0	0	1	2	0	0	1	0	0	0	4	2	0	0	1	0	0	0	0	0	0	0	1	2	0	4	1	0	1	0	0	2	0	0	2
OTU_1938	0	0	0	0	0	0	0	0	0	0	0	1	0	0	0	0	0	4	0	0	0	0	0	0	0	0	0	0	0	0	0	1	0	0	1	0	0	1	0	0	0	0	0	0	0	1	1	1	0
OTU_545	2	3	3	4	3	8	1	3	7	4	6	6	5	3	1	5	2	6	1	2	3	0	3	8	5	9	1	5	6	4	2	6	1	6	3	6	1	2	3	2	0	2	0	8	8	2	3	4	3
OTU_97	0	15	6	6	1	5	2	7	3	5	3	16	2	6	2	3	4	3	0	5	1	6	3	5	2	4	1	3	14	2	1	9	2	8	1	5	4	3	8	5	3	8	1	2	6	2	6	0	0
OTU_794	0	3	0	0	0	0	0	2	0	0	0	0	1	0	0	1	1	0	0	0	1	0	0	0	0	0	0	0	0	1	0	0	3	0	1	0	0	0	0	0	0	0	1	0	1	0	0	0	2
OTU_98	6	4	3	8	3	4	1	10	6	3	3	32	5	2	1	2	0	2	0	0	0	1	3	5	2	5	0	15	0	3	1	3	0	0	1	2	1	2	3	2	4	1	0	9	4	1	4	2	8
OTU_406	0	4	5	0	0	1	0	0	2	1	0	0	3	1	0	1	0	1	2	0	0	3	4	6	3	6	0	1	0	1	0	3	0	11	1	8	3	3	0	1	1	2	0	1	1	4	3	1	1
OTU_386	6	4	1	4	3	3	2	2	5	2	1	4	1	2	1	2	3	1	1	2	2	5	1	1	5	3	1	1	0	0	1	0	2	7	5	3	2	5	3	3	3	0	1	1	1	1	0	1	2
OTU_845	0	1	1	1	0	0	0	0	3	1	1	2	1	0	0	0	1	0	0	1	1	0	0	1	0	0	0	1	0	0	1	0	0	0	1	0	0	2	1	0	0	1	0	0	1	9	0	0	1
OTU_155	8	6	7	7	2	14	4	4	18	0	4	7	8	10	1	7	3	10	4	2	1	7	2	0	9	19	5	8	11	7	0	0	2	2	3	3	4	14	6	10	3	2	3	4	1	3	0	9	15
OTU_27	5	17	3	8	2	8	4	4	7	10	1	3	6	7	3	6	2	14	0	3	3	3	18	18	21	12	5	7	5	10	5	7	3	14	3	6	4	9	1	4	6	18	2	18	5	6	8	3	2
OTU_2260	1	0	13	1	0	0	0	0	6	0	0	0	1	0	0	4	0	0	4	0	0	0	0	0	0	2	1	0	0	0	1	0	0	0	1	1	1	0	0	1	0	0	0	0	0	0	0	0	9
OTU_965	0	0	0	0	0	1	0	0	0	0	0	0	0	3	0	2	0	0	0	3	0	0	0	0	0	0	0	0	0	2	1	1	3	0	0	0	0	0	0	0	0	0	5	2	0	0	0	1	0
OTU_130	5	10	7	4	2	6	6	2	9	0	2	6	7	6	4	6	3	1	3	1	2	4	8	4	2	7	1	6	6	4	1	7	1	11	6	4	4	6	5	4	2	4	5	4	3	1	1	5	3
OTU_19	15	14	12	21	6	17	20	6	21	5	11	15	9	13	5	9	7	15	8	4	1	16	21	31	21	21	8	13	12	22	6	19	2	29	5	12	14	11	6	9	6	14	2	27	10	2	14	9	10
OTU_204	1	5	1	4	4	3	4	2	4	0	1	0	0	5	1	2	1	0	0	1	2	3	0	0	2	2	2	3	2	1	2	1	0	0	5	2	1	1	3	0	1	0	2	2	1	3	1	3	1
OTU_382	1	3	1	3	1	2	1	2	0	4	3	1	0	3	2	0	3	3	3	1	1	2	1	2	0	5	3	0	1	1	4	4	1	4	0	2	0	4	2	2	0	2	0	2	0	0	5	2	4
OTU_411	1	3	1	1	0	1	4	0	1	0	0	0	0	1	1	3	2	0	0	0	0	0	0	0	10	2	0	2	0	0	0	0	0	0	1	0	0	4	0	0	0	2	0	0	0	0	0	0	0
OTU_1475	0	0	0	0	0	0	0	6	0	0	0	0	0	0	0	0	0	0	0	0	0	0	0	0	0	0	0	0	0	0	0	0	0	0	0	0	0	0	0	0	0	0	0	0	0	0	0	0	0
OTU_174	5	12	7	5	0	1	2	0	2	3	0	1	1	5	2	15	2	0	2	2	0	17	4	4	1	8	1	6	0	3	2	2	5	1	3	1	1	3	1	0	1	3	2	3	2	5	0	2	5
OTU_704	4	5	4	3	0	0	0	2	0	1	0	1	0	1	0	1	0	1	0	0	0	0	0	1	0	7	0	1	0	1	0	2	1	0	0	2	1	3	0	0	4	0	2	1	0	0	1	0	0
OTU_677	1	5	6	2	0	0	1	2	5	1	1	0	1	2	0	2	3	1	0	0	1	4	0	2	1	3	1	0	2	1	2	2	1	3	0	3	2	2	4	3	3	8	3	1	0	1	0	0	2
OTU_801	0	0	0	6	0	0	3	1	0	0	0	3	0	2	0	1	1	1	1	0	0	0	0	0	2	0	0	0	2	0	0	0	0	0	0	0	1	0	1	0	0	0	0	1	1	0	0	0	0
OTU_111	11	20	8	9	7	15	10	12	9	6	4	5	5	14	17	15	7	4	5	8	8	3	12	15	11	11	9	9	5	14	11	7	2	8	9	10	9	12	1	5	3	2	7	16	6	6	1	12	7
OTU_1038	1	2	4	1	1	0	0	1	0	0	1	1	0	0	1	5	1	0	0	0	0	0	0	0	0	0	0	0	0	0	0	0	0	1	1	2	0	0	0	0	0	0	0	1	0	1	0	1	0
OTU_63	0	13	6	4	2	2	2	4	5	6	0	6	2	6	0	6	2	11	3	2	1	4	1	2	4	9	4	3	2	2	1	0	5	1	3	7	15	0	0	5	7	0	1	2	7	13	1	5	5
OTU_1441	0	2	1	2	3	1	0	0	0	1	0	1	0	2	0	0	1	0	0	1	0	0	0	1	1	2	0	0	0	0	0	0	0	1	1	1	0	6	0	0	0	1	0	0	0	1	1	0	0
OTU_71	10	27	51	18	11	10	5	8	15	10	8	4	4	42	12	26	21	7	11	6	6	45	5	17	6	15	7	19	3	6	7	4	15	3	8	8	12	11	5	8	8	24	21	8	9	9	9	6	28
OTU_510	1	0	3	1	0	0	0	0	0	1	0	0	0	0	0	1	1	0	1	0	0	1	0	1	0	1	1	1	0	0	1	0	1	0	0	2	3	0	0	1	1	0	0	0	1	0	0	0	0
OTU_558	0	5	5	7	0	1	1	0	3	0	0	5	0	8	5	3	0	0	4	0	0	1	0	0	0	1	3	2	1	0	0	0	0	0	2	0	3	1	0	0	0	0	3	0	0	1	0	0	2
OTU_197	6	4	3	3	2	6	3	6	3	6	2	24	1	2	0	0	4	15	1	9	2	2	6	9	10	32	2	3	1	4	2	0	1	2	2	16	5	15	0	0	0	1	2	95	0	4	9	3	2
OTU_1523	0	0	0	0	0	0	0	0	2	0	0	0	0	0	0	0	0	0	0	0	0	0	0	0	0	1	1	1	0	0	0	0	0	0	0	0	0	1	0	0	0	2	0	1	0	0	0	0	0
OTU_55	7	31	5	10	5	14	9	7	11	13	5	19	5	6	7	6	7	5	4	3	7	14	11	9	11	4	7	11	4	12	6	19	5	2	7	6	11	8	11	5	7	4	2	9	11	2	4	6	9
OTU_1894	0	2	0	0	0	0	0	0	1	0	0	2	0	0	0	0	1	0	0	0	0	0	0	0	0	1	0	0	0	0	0	0	0	0	0	0	0	0	0	0	0	0	0	0	0	0	0	0	1
OTU_200	7	14	16	22	4	6	12	4	18	13	8	11	0	7	5	5	9	11	3	6	5	7	7	7	23	17	2	11	11	4	2	5	1	9	3	10	19	9	8	7	2	8	0	12	16	5	12	7	3
OTU_166	1	3	5	7	2	2	5	1	6	5	3	5	1	1	6	4	3	4	4	0	1	2	0	1	6	8	1	5	2	1	1	2	1	2	4	2	5	10	1	7	0	4	2	6	5	0	6	5	5
OTU_65	3	24	11	17	7	11	7	20	19	9	8	16	8	4	4	9	12	13	4	8	8	6	5	12	15	21	7	6	13	14	8	13	5	6	8	18	11	12	11	16	11	2	3	18	18	7	6	14	5
OTU_1018	2	1	2	0	0	0	3	1	0	1	0	0	0	0	0	0	0	4	1	1	0	0	2	3	1	1	2	1	0	1	0	1	0	3	0	2	0	3	3	2	0	5	0	2	1	0	0	0	1
OTU_85	12	35	11	14	2	7	2	7	10	1	4	10	6	12	2	16	6	1	3	4	5	11	10	3	16	15	5	20	2	6	7	10	7	5	6	7	8	7	9	10	11	6	4	3	5	7	2	8	12
OTU_800	3	2	0	2	2	0	0	0	1	0	0	2	0	0	0	1	0	2	0	1	0	2	0	1	0	1	3	2	1	0	2	0	0	0	0	2	1	1	0	1	0	0	2	2	1	1	0	3	2
OTU_1332	0	0	0	0	0	0	0	0	0	0	0	0	4	0	0	2	1	0	0	0	1	0	0	0	0	0	0	0	2	0	1	0	0	0	0	1	0	0	1	0	0	0	0	0	0	0	0	0	0
OTU_149	13	15	11	5	9	7	6	4	10	1	3	17	7	19	0	12	8	3	9	11	7	7	0	2	6	8	9	10	11	4	2	0	4	5	14	4	6	4	7	6	6	2	4	1	6	4	1	5	14
OTU_163	1	13	14	1	0	1	0	5	8	3	1	7	39	8	7	17	8	0	4	7	4	8	3	3	3	4	12	4	0	3	2	1	82	1	9	4	3	4	1	3	11	1	28	1	1	2	0	10	12
OTU_362	5	9	9	10	7	4	2	11	9	5	7	9	2	7	0	8	4	8	2	3	8	2	5	3	5	7	3	9	10	5	3	4	4	5	2	5	5	4	5	10	10	3	2	10	2	9	2	6	2
OTU_2351	1	2	1	6	0	3	1	0	4	0	2	3	1	9	2	6	4	1	5	3	1	2	0	0	4	5	4	6	0	2	0	0	4	5	1	1	6	0	0	4	0	4	2	0	1	4	0	3	3
OTU_156	0	6	2	0	3	1	0	6	2	0	0	0	8	2	0	2	4	0	2	4	5	4	0	0	1	0	9	0	0	0	7	0	1	0	4	2	0	0	2	2	2	0	0	0	4	0	0	4	12
OTU_67	4	9	6	3	1	6	1	15	8	4	2	13	5	6	0	7	7	0	1	4	13	15	5	2	3	3	4	1	5	6	9	4	7	4	5	4	11	3	1	4	3	2	4	1	6	7	1	21	11
OTU_750	2	2	0	1	0	0	0	0	1	0	0	2	1	1	0	0	0	0	0	0	0	1	0	0	1	1	0	4	2	0	0	0	0	0	0	0	2	1	1	1	0	0	0	1	4	0	3	0	0
OTU_221	3	6	1	3	3	0	3	0	6	0	0	4	0	3	0	2	4	2	2	3	1	4	0	1	4	7	5	3	2	1	4	2	4	5	0	4	3	3	3	5	3	2	1	3	4	0	4	5	4
OTU_342	2	4	1	1	1	1	0	0	2	0	0	2	0	1	0	0	0	1	0	1	0	0	3	1	2	1	0	0	0	0	1	1	0	2	0	0	3	1	0	2	0	0	0	3	0	0	1	0	0
OTU_2080	0	0	0	0	0	2	1	2	0	0	0	0	0	0	0	0	0	1	0	0	0	0	3	0	3	0	0	1	0	0	0	0	0	0	1	1	1	1	0	0	0	0	0	2	0	2	0	0	0
OTU_2443	0	0	0	1	0	1	0	0	0	0	0	3	0	1	0	0	0	0	0	0	0	0	0	1	0	0	0	0	0	0	0	0	2	0	1	0	0	0	1	0	0	0	2	0	0	0	0	0	0
OTU_206	3	11	6	1	1	0	0	1	4	0	2	7	2	4	2	8	2	1	1	1	2	10	1	1	5	7	8	3	1	2	0	0	3	0	4	0	1	5	0	3	2	2	2	0	1	1	0	1	7
OTU_1359	0	3	1	0	0	2	0	1	0	0	0	2	0	0	0	0	0	0	0	1	2	0	3	0	0	3	1	0	0	1	0	1	3	0	3	0	1	2	0	3	0	0	0	0	0	0	1	1	3
OTU_602	8	11	11	13	12	5	9	17	15	3	10	8	8	15	3	13	13	9	4	5	2	17	25	3	12	6	6	9	16	6	11	3	11	5	6	17	15	19	15	11	21	4	9	17	9	13	12	8	15
OTU_2401	0	0	0	0	0	1	0	0	0	1	0	0	0	0	0	0	0	0	0	0	0	0	1	0	0	0	0	0	0	0	0	0	0	0	0	1	0	1	0	1	1	0	0	0	0	0	0	0	0
OTU_1022	3	2	1	2	0	0	2	0	2	0	0	2	0	0	1	0	0	0	0	0	0	0	0	0	0	2	0	0	1	1	2	0	0	0	0	1	0	0	1	4	0	1	0	1	1	1	0	0	1
OTU_377	3	2	1	0	0	1	0	2	0	2	2	2	0	5	2	1	3	0	0	0	0	0	1	0	1	3	0	2	0	3	2	1	1	2	0	1	1	1	1	1	0	1	0	1	0	0	0	0	0
OTU_7	28	64	39	65	20	44	14	32	51	22	56	47	43	41	20	48	43	27	14	21	24	21	11	24	45	59	50	34	35	13	23	16	40	15	27	42	65	59	56	40	42	15	34	36	47	25	16	32	22
OTU_391	1	2	1	4	5	3	2	5	6	4	0	8	0	2	0	1	2	5	0	0	1	0	5	1	4	4	1	3	4	3	1	0	1	2	0	14	4	5	1	2	2	0	0	6	3	1	1	0	0
OTU_139	1	8	6	3	2	5	4	4	3	6	1	3	8	4	2	5	4	2	5	5	4	3	4	2	4	4	0	3	1	9	2	4	2	4	6	5	2	2	1	3	3	6	0	3	5	5	1	7	5
OTU_915	1	2	6	0	0	0	0	0	1	0	2	1	0	0	1	2	1	0	0	0	0	0	1	0	0	2	0	3	1	1	0	0	0	2	0	0	0	1	0	1	0	0	0	0	2	1	0	0	2
OTU_18	11	23	28	25	17	9	5	15	27	13	21	15	16	28	10	15	24	17	5	18	39	32	13	18	12	14	7	12	16	12	16	14	16	5	16	28	43	14	18	28	33	4	15	22	17	20	12	18	16
OTU_651	1	3	0	2	1	0	0	0	0	0	1	1	1	0	1	0	1	0	0	0	0	0	2	0	3	1	1	0	1	0	0	0	1	2	0	0	0	1	1	8	3	0	1	2	0	2	2	0	0
OTU_17	10	10	6	15	11	17	9	1	31	3	5	12	16	24	3	9	13	3	5	3	1	3	4	3	16	11	18	18	6	4	9	0	7	9	2	11	9	17	7	23	5	9	1	8	8	11	3	8	5
OTU_1539	0	0	0	1	0	0	0	0	0	0	0	0	0	0	0	0	0	0	0	0	0	0	0	0	0	0	0	0	0	0	0	0	0	0	0	0	0	0	0	0	0	1	0	0	0	0	0	0	0
OTU_178	2	3	2	10	2	4	2	2	2	2	0	1	0	1	1	1	2	3	0	0	0	0	3	2	8	5	1	4	1	1	0	0	1	1	4	0	2	2	0	1	1	0	0	5	3	2	3	0	1
OTU_90	4	12	13	2	2	2	8	2	6	4	1	6	2	7	3	4	3	4	2	2	4	6	10	6	4	12	4	2	3	7	2	9	7	14	0	20	3	6	2	3	5	6	6	1	0	4	1	2	37
OTU_134	5	8	3	2	2	11	7	0	2	4	1	5	0	1	0	0	2	3	4	0	0	0	1	3	3	14	1	2	2	1	1	4	5	2	0	9	7	9	0	5	4	0	1	7	1	5	3	0	1
OTU_269	5	22	30	8	11	11	6	27	10	7	9	3	14	12	8	31	20	13	5	28	25	27	10	12	8	17	14	8	12	10	28	9	14	7	8	13	12	11	17	16	48	11	26	14	10	18	13	27	22
OTU_46	6	33	16	7	3	5	1	20	5	0	5	6	8	13	4	9	6	5	8	8	4	18	4	18	1	9	7	5	9	4	10	7	2	1	12	15	3	3	7	4	4	1	5	1	2	3	3	10	15
OTU_434	2	7	10	3	3	3	0	4	5	2	4	3	5	4	4	6	2	7	4	5	4	4	11	2	2	1	0	1	3	3	2	4	6	6	4	5	2	3	8	7	6	11	7	7	1	2	3	8	1
OTU_33	6	14	4	11	7	10	2	6	7	6	10	6	2	10	4	4	4	9	2	6	6	4	5	8	16	9	6	22	4	5	4	6	3	0	5	6	7	5	3	8	3	3	2	5	11	1	7	6	5
OTU_227	0	1	2	1	14	1	0	2	3	1	1	0	7	0	1	8	5	1	0	6	2	15	6	1	3	2	3	0	0	7	2	2	5	4	8	13	1	0	1	4	5	6	0	0	0	13	0	2	34
OTU_254	3	16	6	4	3	0	0	4	4	0	0	1	5	7	1	17	7	0	1	3	2	15	4	0	0	0	3	0	1	1	4	1	2	0	9	4	3	0	6	4	6	0	2	0	0	1	0	4	9
OTU_2347	1	1	1	2	1	2	0	1	1	2	1	2	1	2	0	1	6	0	1	1	0	1	1	3	0	1	1	0	3	1	3	0	0	5	1	0	4	0	0	0	0	0	0	0	1	2	2	1	2
OTU_138	1	6	2	1	1	1	0	0	2	0	9	3	2	4	1	0	3	0	3	0	0	1	0	0	1	13	4	4	3	0	1	0	3	0	0	0	1	2	2	2	2	0	0	0	1	1	1	1	2
OTU_283	2	3	0	2	0	2	2	1	1	4	2	2	3	1	0	1	1	0	1	0	0	2	1	8	3	4	1	5	2	3	0	1	0	5	1	2	2	1	1	0	1	5	1	2	0	2	2	1	2
OTU_56	5	25	9	14	2	10	7	13	18	14	3	6	9	17	7	6	7	4	2	2	6	8	10	6	9	11	4	25	6	5	8	6	3	17	6	4	7	15	7	9	4	14	4	9	13	3	5	8	4
OTU_1140	1	0	0	0	0	1	0	0	0	0	0	0	0	0	0	0	2	0	0	0	0	0	0	0	0	1	0	0	0	0	0	0	0	0	1	0	1	0	0	1	0	0	0	1	0	0	0	0	0
OTU_116	2	5	7	1	2	1	1	2	20	0	2	4	9	11	2	17	8	1	2	9	4	4	2	0	5	3	8	4	9	2	4	0	6	0	3	0	3	0	4	7	5	1	1	1	4	0	2	10	7
OTU_1051	0	0	2	2	0	0	0	0	2	0	0	0	0	3	0	1	1	0	0	0	0	0	0	1	0	0	0	2	0	0	0	1	0	0	1	0	1	0	0	1	1	0	0	0	0	0	0	0	0
OTU_215	2	6	3	5	0	6	2	0	1	0	5	3	1	1	0	0	0	3	0	0	2	0	0	3	6	21	3	11	0	0	0	1	0	1	1	1	6	7	1	1	0	2	0	2	2	0	2	0	0
OTU_868	0	3	8	0	0	0	0	3	0	3	0	0	2	1	0	1	0	2	2	0	1	1	3	1	1	4	0	2	3	0	1	2	3	3	1	6	2	1	0	1	2	0	0	0	0	2	1	1	1
OTU_21	13	44	33	13	9	13	6	14	26	8	8	19	19	19	6	10	7	10	8	27	8	11	7	24	35	12	11	28	23	9	10	6	10	1	16	7	14	19	9	15	14	8	12	8	11	4	3	17	16
OTU_244	3	10	3	9	6	3	2	9	1	3	8	3	2	7	1	11	7	2	7	1	8	4	5	2	7	10	2	9	5	12	4	2	2	7	0	6	11	2	7	5	4	1	3	11	2	4	4	7	2
OTU_1156	2	4	1	4	3	6	0	0	3	1	1	1	4	1	0	0	1	1	2	0	0	0	1	1	11	6	3	1	0	1	0	0	3	0	2	4	1	1	5	0	1	0	0	3	1	0	1	0	1
OTU_746	0	0	0	0	1	1	0	3	3	0	1	2	1	0	0	0	3	1	0	0	0	0	0	0	4	5	1	3	1	0	0	0	1	0	0	1	1	1	1	0	0	1	0	0	0	0	0	1	1
OTU_32	17	74	39	19	11	16	0	21	18	10	11	12	24	32	22	28	23	18	9	13	8	43	10	15	14	10	15	10	21	5	15	15	7	7	16	10	11	9	6	27	12	6	8	2	14	15	9	13	28
OTU_291	3	9	3	8	1	6	4	3	8	0	0	2	3	1	0	3	1	2	4	4	0	2	1	2	1	3	1	6	2	6	2	0	0	11	1	2	9	2	2	6	16	1	1	1	5	0	1	1	3
OTU_440	3	7	11	4	3	7	0	4	0	0	1	1	0	1	0	4	1	0	3	0	2	4	0	0	0	3	1	2	0	2	0	1	0	0	0	2	2	3	0	3	1	0	2	0	0	1	0	4	1
OTU_2073	1	1	2	8	1	1	1	1	1	3	2	0	0	1	0	0	0	1	0	1	0	0	2	4	6	5	1	2	3	0	0	2	0	1	0	3	1	1	3	1	0	3	0	3	7	0	2	0	2
OTU_196	0	2	4	0	1	3	0	2	3	1	1	0	2	2	1	4	0	0	1	0	12	0	4	1	1	2	3	4	1	2	2	2	2	6	3	1	1	1	0	1	3	12	0	0	0	1	0	0	3
OTU_500	0	2	0	0	1	0	0	3	0	0	0	0	0	3	1	1	2	1	1	0	0	0	0	0	1	2	1	3	1	1	1	0	0	3	0	1	0	0	0	0	1	0	0	6	0	0	0	0	3
OTU_788	0	1	0	1	0	0	0	0	1	0	0	0	0	0	0	1	0	0	0	0	0	0	2	1	1	0	0	0	0	0	1	1	0	1	1	0	0	0	0	0	0	0	0	0	0	0	0	1	0
OTU_88	5	6	1	19	3	8	8	3	2	10	7	12	13	1	0	3	4	11	1	3	1	3	5	4	7	11	1	3	0	4	5	1	4	1	5	2	7	7	2	2	3	1	3	4	7	3	7	6	6
OTU_1047	0	0	0	1	0	1	1	0	0	0	0	0	2	0	0	0	0	0	0	0	0	1	0	1	0	0	0	1	0	0	0	0	0	0	0	0	2	0	0	0	0	0	0	1	0	0	0	0	0
OTU_305	6	7	3	6	1	4	1	10	1	3	1	6	4	2	2	7	7	2	2	5	0	5	0	5	7	13	7	3	7	6	14	0	3	0	2	2	5	2	11	3	2	1	4	1	0	1	3	2	7
OTU_2428	1	5	0	0	0	1	2	1	0	1	1	3	1	0	0	5	2	0	0	1	1	0	0	2	0	3	0	0	2	0	2	1	0	2	0	3	0	1	2	1	2	0	4	1	2	1	4	1	0
OTU_445	3	4	10	4	1	2	4	1	7	0	1	4	1	2	1	5	6	1	1	0	0	5	0	0	1	4	0	5	2	1	1	1	1	1	0	2	4	3	4	4	3	2	1	4	2	1	0	0	3
OTU_150	13	21	11	6	4	9	5	9	9	10	9	8	12	13	7	3	14	11	3	7	5	7	14	9	9	9	3	6	9	12	7	12	1	8	7	9	6	8	10	18	6	9	4	9	7	3	1	3	5
OTU_34	5	27	14	18	13	12	8	7	19	14	8	8	6	10	5	11	9	8	4	8	11	12	6	4	17	22	14	12	12	4	9	2	12	3	9	14	10	9	12	10	7	1	1	17	16	10	1	4	8
OTU_374	0	4	2	6	0	4	1	2	3	3	5	2	0	0	0	1	0	3	0	0	0	0	1	0	5	1	1	3	1	0	0	0	0	8	0	1	0	1	0	0	0	4	0	7	1	0	0	0	0
OTU_461	5	4	3	4	2	3	0	1	1	1	3	2	3	2	1	4	1	4	3	2	2	0	0	2	5	4	0	0	2	0	0	1	1	1	2	5	1	1	2	3	5	0	3	1	2	6	1	4	3
OTU_225	1	9	4	11	1	0	5	2	10	14	4	9	1	7	0	3	10	2	0	2	6	3	1	6	6	16	4	5	2	4	2	4	5	2	3	3	4	2	3	5	6	1	4	5	9	5	1	4	1
OTU_140	8	23	10	8	3	14	9	9	12	3	4	13	9	19	0	8	5	18	4	4	5	18	7	1	6	12	8	15	5	9	4	3	9	4	8	14	4	9	1	9	5	9	5	13	10	4	5	9	13
OTU_694	0	5	3	2	0	1	0	1	3	1	0	0	6	0	0	1	3	0	0	0	0	1	1	0	0	0	0	0	1	1	6	0	0	0	3	0	0	0	3	0	1	0	1	0	1	0	0	1	3
OTU_43	9	7	9	6	3	2	2	4	8	2	1	7	14	8	3	7	9	5	2	5	10	6	1	1	16	8	11	17	9	6	5	2	21	0	8	2	9	5	12	7	8	0	3	7	10	5	2	9	3
OTU_83	6	11	6	12	6	5	7	2	7	5	3	2	1	4	1	3	3	5	0	2	3	1	1	3	5	25	1	9	1	2	2	4	2	12	1	4	7	7	2	4	6	1	0	3	1	3	5	4	4
OTU_45	5	10	3	26	3	6	0	0	4	7	6	3	3	5	5	3	0	0	2	2	3	2	1	3	13	13	2	15	0	1	1	0	0	18	1	6	11	6	6	6	2	19	1	7	11	4	3	2	7
OTU_2224	0	1	3	3	3	0	1	0	0	0	0	1	0	0	0	0	0	1	0	1	4	1	0	0	2	0	1	0	0	0	1	0	0	2	0	1	0	2	0	1	1	1	1	0	3	2	0	1	0
OTU_255	0	5	3	3	0	0	0	4	2	0	0	0	6	3	0	2	3	0	0	2	2	3	0	0	0	1	1	0	4	0	3	0	0	0	11	0	1	0	2	0	3	0	0	0	3	1	0	3	7
OTU_680	1	7	3	0	0	0	0	1	0	1	0	1	0	0	1	0	4	1	0	0	1	1	0	0	0	5	0	0	0	0	0	1	1	0	1	1	1	0	0	0	3	2	0	6	0	1	0	0	2
OTU_81	1	13	3	1	2	3	3	3	3	5	1	4	3	3	3	13	2	4	4	4	1	12	8	7	1	7	2	1	8	10	5	8	3	5	0	4	2	2	1	3	3	4	2	3	2	1	4	3	7
OTU_117	7	7	13	4	3	2	1	0	7	1	1	4	3	11	6	18	2	1	3	1	2	9	4	1	3	5	1	6	2	1	1	1	0	1	0	1	7	1	1	1	6	0	0	0	0	1	1	4	13
OTU_124	4	6	5	9	5	6	3	10	7	9	2	9	6	11	0	11	0	4	1	3	4	16	2	3	2	22	2	9	5	9	7	2	0	5	4	2	9	7	14	3	8	7	2	9	3	2	2	8	11
OTU_102	9	12	2	36	21	14	10	4	20	1	17	19	1	19	5	1	4	2	6	8	2	3	0	7	35	52	8	19	2	0	4	0	2	0	2	13	15	22	4	10	3	0	2	6	19	6	3	9	4
OTU_295	1	4	10	2	0	4	0	0	3	0	2	2	1	0	0	4	1	0	2	1	2	0	0	1	1	1	1	1	0	0	1	0	2	0	7	2	1	2	1	2	1	1	2	0	0	0	1	0	3
OTU_456	1	5	1	4	3	1	2	3	0	4	7	0	4	2	0	2	5	2	1	0	1	3	0	3	5	5	1	6	1	1	2	1	0	3	0	1	2	4	1	2	5	3	1	5	2	3	2	0	6
OTU_41	2	32	7	18	3	2	2	20	5	1	2	3	23	11	6	27	18	0	5	19	34	21	2	3	8	7	15	3	5	11	24	2	21	0	19	4	6	1	8	8	24	0	5	2	0	6	2	25	12
OTU_815	1	9	3	4	5	6	4	0	6	7	0	4	0	1	1	2	1	11	0	2	2	4	13	14	2	10	0	5	5	14	0	7	2	2	3	9	0	7	4	2	2	0	0	16	1	1	6	3	1
OTU_182	7	4	2	8	2	4	4	2	12	4	5	17	5	2	1	3	2	8	1	4	3	4	7	8	5	8	4	7	7	10	3	3	2	4	0	2	2	0	5	3	4	0	1	7	1	2	0	3	2
OTU_40	13	33	32	52	19	17	16	37	53	23	20	20	23	41	13	27	10	20	6	16	16	10	26	31	25	45	3	36	28	25	20	22	23	22	15	19	27	35	22	41	33	18	29	48	21	14	16	27	18
OTU_1838	0	0	0	0	0	1	0	0	0	1	0	0	0	0	0	0	0	0	0	0	2	0	0	0	1	2	0	1	1	0	0	1	0	0	1	1	0	0	0	1	0	0	0	0	0	0	1	3	0
OTU_251	0	2	4	0	0	0	9	1	1	0	0	1	3	0	1	9	0	4	1	2	0	10	1	1	0	3	1	3	0	1	2	6	2	5	1	0	0	2	0	0	2	0	0	0	0	0	0	2	2
OTU_84	9	15	8	14	10	9	11	3	1	4	3	17	2	7	2	2	5	4	0	0	2	3	3	0	8	44	2	1	2	1	1	2	4	0	1	7	10	17	1	1	5	2	0	17	3	4	1	6	2
OTU_619	5	8	4	5	7	7	3	10	9	2	3	3	3	6	0	6	3	8	2	3	3	11	5	9	10	5	2	12	6	11	7	15	3	11	2	17	7	12	7	7	3	4	4	13	7	10	13	6	6
OTU_31	20	31	19	19	13	29	20	17	23	12	14	40	16	27	6	18	23	24	7	9	17	26	13	9	25	35	11	25	19	11	31	8	6	17	19	25	24	17	28	10	23	16	13	40	18	16	7	29	15
OTU_92	3	9	20	5	5	3	8	3	6	9	5	8	7	10	7	11	3	5	6	4	3	11	13	11	3	11	2	6	4	17	2	11	2	5	4	2	21	5	3	8	8	6	5	4	3	6	6	6	7
OTU_237	1	2	0	3	0	0	0	4	1	1	0	2	0	0	15	0	0	0	0	0	0	1	0	0	0	0	0	0	0	0	40	0	0	0	0	1	0	0	0	0	0	0	0	0	0	0	1	0	0
OTU_343	2	2	2	5	2	5	1	2	4	21	2	7	1	9	1	4	2	0	1	1	4	1	2	2	5	14	2	6	1	5	0	1	2	2	0	3	2	7	3	1	3	7	1	7	2	3	2	1	2
OTU_472	2	4	4	2	0	0	0	0	1	2	1	3	3	11	1	2	1	0	4	1	1	2	0	0	0	2	1	1	0	2	1	2	0	1	2	1	1	0	2	1	9	1	1	0	2	2	0	0	2
OTU_526	1	2	1	1	1	0	0	1	1	1	0	0	0	0	0	0	1	0	0	0	1	0	0	0	5	0	0	1	0	0	0	0	0	0	0	2	0	2	0	2	0	0	0	0	3	2	2	1	1
OTU_49	28	42	24	38	14	9	12	14	34	13	12	18	15	18	5	25	7	22	11	10	8	10	17	39	28	25	10	30	20	23	12	46	10	22	16	28	19	33	16	21	11	33	9	28	23	10	19	15	11
OTU_346	0	4	0	9	1	1	1	2	1	1	1	7	0	1	0	4	1	2	0	1	0	0	0	0	0	4	0	2	5	0	2	2	0	0	0	0	1	7	6	2	2	0	0	1	0	0	0	3	0
OTU_812	0	1	0	1	1	1	0	0	0	0	0	2	0	0	0	0	0	1	0	0	0	0	0	3	0	2	0	6	0	0	0	0	0	0	0	2	0	0	0	0	0	0	0	4	2	0	0	0	0
OTU_782	0	1	2	1	1	0	0	2	0	0	0	0	3	0	0	3	3	0	0	0	1	0	1	0	3	1	2	1	2	0	3	1	5	0	0	3	4	1	1	2	5	0	1	1	1	0	1	3	2
OTU_460	0	5	3	1	2	1	0	1	0	0	2	0	6	1	0	4	2	0	2	2	3	2	1	0	0	7	3	1	4	0	2	0	0	0	0	3	2	0	4	0	2	1	0	0	2	1	0	2	4
OTU_325	4	15	21	6	8	12	7	4	12	7	3	5	4	13	10	10	9	12	5	4	3	21	10	13	11	22	0	7	3	4	2	0	7	6	3	3	9	6	3	7	6	1	6	8	2	2	11	5	6
OTU_1576	0	0	0	0	0	0	0	0	0	0	0	0	0	0	0	0	0	0	0	0	0	0	6	0	0	0	0	0	0	0	0	0	0	0	0	0	0	0	0	0	0	0	0	0	0	0	0	0	0
OTU_160	6	1	3	12	0	7	4	4	4	2	1	3	2	4	0	0	0	4	1	1	2	1	0	4	6	8	0	10	0	3	0	3	1	2	0	4	3	13	2	4	3	1	0	14	6	4	1	0	2
OTU_260	4	7	6	5	2	7	0	2	2	4	2	3	1	2	0	3	0	7	0	2	2	1	1	7	9	4	3	7	3	1	2	2	1	3	1	3	5	2	0	3	0	4	2	2	1	3	2	1	1
OTU_1521	4	2	0	1	0	0	0	0	2	0	0	0	4	1	0	4	2	0	0	5	1	0	0	0	2	0	0	0	0	0	8	0	0	2	1	1	0	1	0	1	2	0	1	1	2	0	0	1	5
OTU_132	2	4	1	4	1	3	3	5	3	1	2	7	5	6	4	8	7	2	3	3	8	3	2	1	6	8	2	1	3	2	1	0	4	2	6	5	15	3	4	9	4	0	1	5	3	5	4	5	2
OTU_1395	1	0	0	0	0	0	0	0	1	0	0	1	0	0	0	0	0	0	0	0	1	0	0	0	0	1	0	0	0	0	0	0	0	0	0	0	0	0	0	1	0	0	0	1	0	0	1	0	0
OTU_893	0	2	1	0	1	2	0	0	0	1	1	1	0	1	0	0	0	0	0	0	0	0	0	1	1	2	0	2	0	0	0	0	0	0	0	0	2	0	0	0	1	0	0	0	0	1	0	0	0
OTU_2460	1	0	0	0	1	0	0	0	0	0	0	0	0	0	0	0	0	0	0	0	0	0	0	4	0	0	0	1	0	0	0	0	0	0	0	0	0	0	0	0	0	0	2	0	0	0	0	0	0
OTU_493	1	6	4	1	0	0	2	2	1	0	1	0	1	0	0	7	4	0	4	3	3	2	1	0	0	0	2	2	0	1	0	0	3	0	2	0	0	1	0	2	0	0	2	0	0	0	0	2	7
OTU_1252	4	6	0	5	4	0	3	1	2	3	0	4	0	3	1	0	1	3	0	1	0	1	0	0	3	2	0	3	3	0	3	4	3	0	0	4	6	1	4	8	1	0	0	2	1	2	7	0	0
OTU_1494	0	1	1	1	0	0	1	0	0	1	1	2	0	0	0	0	0	1	0	0	0	0	0	0	0	0	0	0	0	2	1	0	0	0	0	0	1	0	7	0	0	0	0	0	0	0	0	0	0
OTU_356	1	5	3	2	1	1	1	12	5	0	0	4	0	1	0	5	0	1	2	0	0	0	0	5	3	3	0	0	0	1	0	1	0	1	0	1	0	2	1	2	0	2	0	2	2	1	2	0	1
OTU_348	2	3	4	6	4	6	4	6	9	6	0	0	0	7	1	2	0	4	2	1	0	4	7	2	2	9	0	7	6	2	2	4	1	4	2	9	0	7	7	5	1	2	3	5	3	5	3	1	4
OTU_423	0	8	13	0	1	0	0	4	4	0	1	0	9	2	1	11	11	0	4	14	17	14	0	0	0	0	10	0	0	0	9	0	9	0	10	0	0	0	3	1	8	0	6	0	0	1	0	14	17
OTU_47	6	5	7	18	7	9	10	3	13	5	12	10	2	4	7	2	0	6	2	4	3	2	10	2	20	22	2	9	1	1	1	5	4	7	1	21	11	19	5	15	6	9	0	23	5	10	0	5	3
OTU_444	0	1	1	2	0	1	1	0	3	0	2	1	0	0	0	0	2	1	0	0	1	0	0	0	1	0	1	1	0	0	0	1	0	1	2	0	0	0	1	1	0	0	4	0	1	0	2	0	2
OTU_112	5	10	17	13	10	11	9	5	12	15	4	6	3	12	8	14	12	10	4	5	8	11	9	7	8	22	7	12	7	7	3	10	17	25	9	21	10	18	12	6	8	15	6	5	12	10	5	10	8
OTU_896	3	6	1	12	1	1	0	0	0	2	2	3	0	1	0	2	0	1	0	4	0	0	1	0	7	7	0	2	0	2	1	1	1	0	1	2	1	3	1	1	0	0	1	3	3	6	2	1	2
OTU_891	1	2	0	6	2	0	0	1	0	0	4	4	4	0	1	1	0	1	1	0	0	1	0	1	2	4	1	0	0	0	0	2	2	0	1	4	4	0	1	0	0	2	1	4	0	1	0	0	0
OTU_1145	1	13	6	4	1	1	1	8	0	1	3	3	8	4	1	3	3	3	1	5	1	6	2	2	2	3	2	2	2	9	4	2	2	2	5	1	0	2	5	3	0	1	0	0	1	4	2	4	5
OTU_1265	0	1	0	2	0	0	0	1	1	0	0	0	0	0	0	0	0	0	0	0	1	0	0	0	1	1	0	0	0	1	0	0	0	0	1	0	0	1	0	0	0	1	0	3	2	4	0	1	0
OTU_64	2	16	36	7	13	3	2	25	9	1	4	1	21	21	7	25	33	2	9	16	24	19	7	2	3	8	8	17	16	11	31	4	17	0	29	9	12	6	8	9	26	5	17	4	8	6	2	7	16
OTU_365	1	11	2	7	2	1	3	3	1	0	1	5	1	1	1	0	1	1	0	1	3	1	1	1	11	3	0	5	5	1	1	2	1	6	0	3	3	2	1	2	1	0	2	1	1	0	0	1	1
OTU_2298	0	0	0	0	0	0	0	0	0	0	0	0	0	0	0	0	0	0	0	0	0	3	0	0	0	0	1	0	0	0	3	0	0	0	0	0	0	0	0	1	0	0	0	0	0	0	0	0	0
OTU_464	0	4	1	2	1	1	0	1	2	0	0	0	3	4	1	0	2	0	5	2	0	2	0	0	2	4	5	2	1	3	0	0	0	0	2	2	2	0	0	1	3	0	0	0	0	0	0	3	2
OTU_194	6	10	4	10	1	3	8	6	5	6	4	6	7	7	2	3	5	4	2	6	4	5	4	3	7	14	4	3	3	2	6	5	3	5	6	6	8	2	8	8	4	10	2	1	2	7	2	8	0
OTU_281	3	2	12	0	1	0	1	2	4	0	4	0	18	2	2	8	1	0	3	4	17	13	2	0	0	0	1	1	0	5	2	0	2	4	2	1	1	2	0	1	1	0	0	10	3	0	0	6	11
OTU_187	1	2	0	6	0	8	6	0	0	3	1	1	0	0	0	0	1	2	0	0	1	1	0	1	6	2	0	6	0	0	0	2	0	1	0	6	1	2	0	1	0	1	1	3	2	0	0	0	1
OTU_243	1	3	1	1	2	0	1	1	0	4	0	8	0	1	0	0	0	1	0	0	0	1	1	1	0	6	0	0	1	2	0	1	0	0	0	0	1	5	1	0	0	0	0	5	1	2	4	2	0
OTU_1855	0	1	0	0	0	0	0	0	0	0	0	0	0	0	0	0	0	0	0	0	0	0	1	0	0	0	0	0	0	0	0	1	0	0	0	0	0	0	4	0	0	0	0	0	0	0	0	0	0
OTU_125	8	16	8	8	3	11	22	5	5	8	2	8	8	6	5	6	11	9	0	2	2	2	2	4	8	7	4	14	6	1	9	4	2	7	14	6	6	9	5	5	3	19	2	3	1	3	1	1	8
OTU_153	5	14	11	9	5	8	7	2	5	4	1	9	19	7	7	7	1	2	0	4	5	14	5	1	10	6	3	4	3	2	4	0	5	2	4	8	10	19	3	4	4	9	5	8	9	2	1	8	18
OTU_165	6	5	1	9	4	1	5	1	7	5	4	7	0	10	2	4	6	1	0	4	1	4	0	3	6	13	4	8	0	1	1	2	0	0	3	6	4	7	3	2	2	0	3	3	3	3	2	2	4
OTU_469	0	0	0	0	0	5	0	1	1	0	9	0	0	0	0	0	0	0	1	0	0	1	0	3	2	3	2	3	2	3	1	0	1	0	0	1	1	4	2	2	1	0	0	1	0	0	0	1	3
OTU_185	4	17	6	8	0	3	5	7	3	3	0	5	2	2	2	6	0	4	3	2	2	3	5	5	6	9	1	4	2	4	0	0	0	3	1	2	5	10	0	1	10	2	2	4	3	3	3	3	4
OTU_682	0	0	0	0	1	0	0	0	2	0	0	1	1	1	1	1	1	0	0	0	1	0	1	0	0	0	1	1	0	0	1	0	0	0	0	0	0	0	0	0	0	1	0	0	0	0	0	1	1
OTU_241	2	8	6	7	1	1	2	0	6	0	0	1	2	5	3	4	0	1	2	2	1	1	1	1	0	2	2	4	0	0	0	0	0	0	2	2	7	4	3	4	2	0	1	0	3	2	2	1	0
OTU_616	1	0	0	1	0	1	0	0	1	0	0	1	0	1	0	0	0	0	0	1	0	0	0	0	0	3	2	1	0	0	0	0	0	0	1	1	1	0	0	0	0	1	0	1	0	0	0	0	1
OTU_2039	1	2	1	2	0	1	0	0	1	9	2	4	1	0	2	1	1	0	0	1	1	1	0	3	1	1	0	2	2	0	2	0	0	0	0	0	1	8	1	1	1	1	0	2	1	1	2	0	0
OTU_101	0	4	3	17	3	1	2	9	3	0	1	12	1	1	1	3	5	3	2	3	1	1	0	2	3	12	7	2	0	1	3	1	4	0	3	1	11	4	4	3	1	0	3	2	6	3	0	8	2
OTU_702	1	3	0	2	0	0	0	0	0	0	1	2	1	5	1	1	0	0	0	1	0	0	0	3	1	6	2	2	2	0	1	1	0	0	0	1	0	2	0	2	0	0	0	4	0	0	0	0	2
OTU_119	4	7	6	10	5	8	2	2	9	5	5	6	3	12	5	9	5	5	2	1	2	8	6	10	8	7	1	10	1	0	8	4	4	2	2	23	4	9	6	5	5	2	7	14	4	11	1	1	2
OTU_304	5	22	11	9	5	8	2	10	8	6	4	8	5	7	4	14	8	4	2	1	4	8	4	10	3	9	3	7	5	5	15	1	6	0	9	9	9	6	9	6	10	1	8	12	8	10	6	4	10
OTU_776	0	4	1	1	0	0	0	0	1	0	1	3	3	4	2	3	3	0	1	8	3	3	6	0	3	2	4	0	3	4	2	0	2	0	1	3	1	1	2	2	0	0	2	1	1	1	0	1	2
OTU_131	2	5	7	11	4	6	4	2	5	3	2	7	3	7	6	4	5	3	0	2	2	2	1	3	10	6	1	11	1	1	7	1	3	3	3	8	6	4	0	9	4	2	2	1	8	2	5	4	5
OTU_1578	0	0	0	0	0	0	0	0	2	0	0	0	0	1	0	0	0	0	0	0	0	0	0	0	0	0	0	2	0	0	2	0	0	0	0	0	0	0	0	0	0	0	0	0	0	1	0	0	1
OTU_842	2	4	5	0	1	0	0	11	1	0	1	0	7	5	1	6	6	2	3	6	8	11	5	0	0	0	3	1	2	5	6	1	2	0	4	3	2	1	9	5	2	1	8	0	1	1	1	7	10
OTU_205	2	0	0	6	4	0	2	0	0	3	2	5	3	1	0	1	3	1	1	3	0	0	1	0	1	4	2	1	0	1	1	0	0	1	2	1	3	1	6	2	0	1	1	6	2	2	0	2	1
OTU_392	0	2	5	2	1	3	0	1	1	1	2	0	3	0	0	5	3	0	0	1	5	1	1	1	1	2	0	1	5	1	6	0	3	0	1	2	1	0	6	1	3	0	10	1	2	2	1	4	2
OTU_168	8	14	3	9	2	5	5	1	4	4	4	9	6	5	0	4	5	4	3	0	4	3	3	7	5	3	1	11	3	1	4	0	1	5	0	11	6	3	8	7	0	3	0	9	4	0	4	0	2
OTU_68	12	23	27	9	14	9	8	15	8	11	10	19	3	16	8	12	12	20	9	10	9	12	21	22	9	15	5	12	8	26	11	19	8	19	9	11	6	19	4	15	10	25	6	9	3	15	4	12	15
OTU_137	3	4	11	3	2	0	0	2	1	0	1	4	5	7	0	8	4	1	0	10	9	15	2	1	1	8	7	2	2	5	2	2	1	3	10	6	2	2	4	6	2	3	0	2	3	1	0	6	7
OTU_113	8	16	9	2	4	1	2	9	9	2	7	5	3	9	6	2	10	4	2	4	4	6	2	2	4	2	11	7	3	1	2	0	5	0	14	2	5	4	4	6	2	2	8	0	5	2	0	0	8
OTU_246	7	10	7	13	3	20	10	4	4	17	5	12	4	4	2	6	11	9	2	3	0	4	7	10	9	18	4	11	4	2	6	6	1	9	4	16	6	23	14	3	7	2	2	28	14	3	21	12	2
OTU_245	3	5	1	11	5	6	2	2	5	25	0	5	1	4	1	5	3	5	0	3	3	7	0	0	2	7	0	8	2	0	1	1	3	2	2	0	9	2	4	6	0	2	0	1	5	2	0	2	2
OTU_415	2	5	1	4	5	2	3	1	2	1	3	3	0	4	0	2	0	4	1	0	1	0	1	1	5	2	7	1	3	1	2	5	0	3	2	4	3	7	1	2	1	0	0	0	5	0	0	0	1
OTU_2178	0	1	0	0	0	0	1	0	0	0	0	1	0	0	0	1	0	0	0	0	0	0	0	1	0	0	0	0	0	0	0	0	0	0	0	0	0	0	0	0	0	0	0	0	0	0	0	0	0
OTU_1594	0	0	1	0	0	0	0	0	0	0	0	0	0	1	0	0	0	0	0	0	0	0	0	0	0	0	0	0	0	0	0	0	0	1	0	0	0	0	0	0	0	0	0	0	0	0	0	0	0
OTU_123	4	8	10	17	2	7	0	2	15	1	4	4	10	12	2	2	6	1	2	7	5	13	0	0	6	3	5	12	3	2	4	1	1	0	6	6	5	3	5	6	3	0	1	0	6	12	0	1	5
OTU_1231	0	2	0	0	0	0	0	1	0	0	0	0	0	0	1	0	0	0	0	0	0	0	0	0	0	1	1	0	0	0	0	1	0	0	1	1	0	0	0	1	0	0	0	0	0	0	0	1	0
OTU_560	0	3	6	0	0	0	1	2	0	0	0	0	2	0	1	1	1	0	1	0	1	3	0	0	0	1	1	0	0	0	1	0	0	0	2	3	0	0	0	1	0	0	0	0	1	0	0	1	2
OTU_752	0	4	4	0	0	1	0	2	0	0	0	0	1	2	0	1	2	1	0	0	0	1	0	0	1	12	1	2	0	0	1	0	0	0	0	0	1	0	0	1	1	0	0	0	2	0	0	0	3
OTU_72	4	13	10	14	11	4	3	7	15	14	6	7	5	18	4	11	15	7	5	7	11	1	3	5	4	9	6	6	14	0	10	0	2	4	1	7	9	5	10	6	5	3	2	3	5	6	3	14	10
OTU_2102	4	0	5	8	0	1	4	1	6	1	4	5	4	4	0	2	2	3	2	0	2	4	5	5	3	4	1	0	1	2	12	1	2	1	1	0	1	6	0	1	6	6	5	2	1	1	4	2	3
OTU_833	0	3	0	2	0	4	0	0	0	1	0	1	0	0	0	0	0	1	1	0	0	0	0	0	1	1	0	0	0	0	0	1	0	0	0	0	1	3	0	0	0	0	0	0	1	0	0	0	0
OTU_959	0	0	0	0	0	0	0	0	0	0	0	0	0	9	0	0	0	0	0	0	0	0	0	0	0	0	0	0	0	0	0	0	0	0	0	0	0	0	0	0	0	0	0	0	0	0	0	0	0
OTU_133	3	8	8	1	5	1	4	6	7	1	0	5	4	9	5	2	6	0	2	1	8	6	6	5	2	1	1	2	6	3	7	3	5	2	1	6	4	2	3	3	2	3	4	1	1	3	7	4	9
OTU_14	18	28	9	28	11	31	14	2	32	9	11	10	7	25	2	9	12	17	4	3	8	9	10	5	23	16	3	34	7	3	6	9	2	15	5	12	15	14	3	15	7	14	3	12	35	6	14	10	10
OTU_2140	0	0	0	0	1	0	0	0	0	0	0	0	0	0	0	0	0	0	0	0	0	0	0	0	1	0	1	0	0	0	0	0	0	0	0	0	0	2	0	0	0	0	0	3	0	1	0	0	0
OTU_743	1	0	1	5	0	2	0	1	2	1	2	1	0	0	0	0	0	0	0	4	0	0	0	1	5	1	0	0	0	0	0	0	1	3	0	0	0	3	0	0	0	0	0	0	0	0	1	5	1
OTU_1573	2	1	1	0	1	2	1	0	0	0	0	0	1	0	0	0	0	1	0	0	0	0	0	0	0	0	0	0	0	0	0	0	0	0	0	0	1	0	0	0	0	1	0	1	0	0	0	0	0
OTU_1580	0	0	0	1	0	0	0	0	1	0	0	0	0	0	0	0	0	0	0	0	0	0	0	0	0	0	0	1	0	0	0	0	0	0	0	0	2	0	0	0	0	0	0	0	1	0	0	0	0
OTU_142	1	6	3	7	5	1	0	1	11	0	1	1	4	10	0	4	8	1	3	3	5	3	1	0	3	3	5	0	1	1	9	0	2	0	0	6	3	1	1	2	4	0	1	0	2	1	0	10	1
OTU_192	2	5	5	7	8	6	2	4	8	3	3	3	1	3	0	5	4	4	3	1	3	5	5	8	3	16	1	3	5	6	4	1	6	3	7	4	6	7	2	2	2	0	2	1	5	1	4	3	8
OTU_128	19	19	15	12	9	7	1	12	19	0	6	8	9	10	3	11	21	3	11	13	14	10	1	0	2	7	11	8	11	1	13	2	7	1	4	10	9	0	16	6	7	1	8	1	4	0	8	22	8
OTU_96	17	16	12	14	2	13	12	7	5	8	11	19	9	15	3	13	7	7	13	6	2	7	3	9	23	17	3	10	8	2	14	3	6	4	7	16	17	14	8	11	4	4	2	7	14	2	2	3	6
OTU_2188	0	0	0	0	0	0	0	0	0	0	0	0	0	0	0	0	0	0	0	0	2	0	0	1	0	0	0	0	0	0	0	0	0	0	0	0	0	0	0	1	0	0	0	0	0	0	0	0	0
OTU_1564	0	0	0	0	1	0	0	0	0	0	0	0	1	0	0	0	0	0	0	0	0	0	0	0	1	0	0	2	2	0	0	0	0	0	0	0	0	0	0	1	0	0	0	0	1	0	0	0	0
OTU_1199	0	2	0	0	1	0	0	2	3	1	0	1	0	0	0	0	1	1	0	0	0	1	1	1	0	0	0	1	0	0	0	0	0	1	0	0	0	1	0	0	1	0	0	1	0	0	0	0	1
OTU_468	1	0	2	2	0	0	0	0	6	1	1	1	0	4	1	0	0	0	2	0	0	0	0	0	0	6	0	1	0	0	0	0	0	0	0	0	11	0	1	3	0	0	0	0	1	0	0	0	2
OTU_1647	0	3	1	0	0	0	0	1	1	0	0	0	0	2	0	2	0	0	0	2	0	0	1	2	0	1	1	0	0	0	0	0	0	0	0	0	0	0	2	0	0	0	0	0	0	0	0	0	1
OTU_426	2	4	6	10	1	0	4	3	3	0	3	7	6	4	5	9	2	1	2	4	3	4	0	1	2	5	1	3	0	1	3	2	2	2	0	0	1	4	4	8	5	2	2	5	1	3	0	4	8
OTU_95	5	8	1	4	3	6	4	4	9	5	3	2	4	4	1	2	2	0	1	1	1	6	4	3	2	2	3	5	6	3	3	1	1	2	3	2	3	0	3	5	4	0	0	4	5	1	1	1	0
OTU_660	0	0	0	0	0	0	0	0	0	0	0	0	0	0	0	0	0	0	0	1	2	0	2	0	0	0	2	0	0	1	1	1	2	0	1	0	0	0	0	0	0	0	0	0	0	0	0	2	0
OTU_276	5	3	1	1	0	3	0	5	0	1	2	6	1	8	0	4	0	1	0	0	3	0	2	1	4	0	4	0	0	3	0	7	0	6	0	5	6	0	2	0	2	2	0	0	2	1	1	1	3
OTU_271	5	10	7	1	2	2	0	3	2	2	1	5	1	6	1	5	2	2	0	4	2	6	6	1	1	12	9	2	1	1	5	0	2	0	3	0	4	2	8	3	3	4	7	2	2	3	2	7	4
OTU_86	1	0	2	4	0	15	1	0	0	4	1	5	0	0	0	0	0	2	0	0	0	1	6	11	6	5	0	5	2	3	0	2	1	6	0	5	0	13	1	2	0	3	0	7	0	0	3	0	0
OTU_193	6	11	11	1	6	4	1	7	5	1	1	15	1	10	2	12	9	1	1	3	6	2	0	3	2	15	4	6	6	6	2	0	1	1	11	8	2	4	11	5	9	1	0	0	3	5	7	8	4
OTU_219	3	7	5	2	1	5	2	7	4	1	0	3	5	5	1	2	1	1	1	6	4	2	4	2	1	2	8	3	2	2	3	11	2	5	3	1	2	0	5	3	0	2	0	2	2	1	2	4	8
OTU_188	0	1	0	1	0	0	0	0	0	0	1	0	0	0	0	60	0	0	0	0	0	0	0	0	0	0	0	0	0	0	0	0	0	0	0	0	0	0	0	0	0	0	0	0	0	0	0	0	0
OTU_333	3	2	2	1	3	0	0	0	0	0	1	0	1	3	0	2	8	2	0	0	0	0	0	0	4	2	1	1	1	0	0	1	0	1	0	0	1	1	0	6	1	0	0	1	1	2	0	1	0
OTU_60	13	18	11	9	7	17	17	5	14	11	6	14	3	19	5	6	7	4	2	11	1	20	12	10	16	11	2	8	1	8	4	11	13	4	13	1	7	3	14	5	3	3	7	4	1	4	2	7	20
OTU_2315	0	1	0	16	2	1	3	0	0	0	0	1	0	0	0	0	1	0	0	0	0	2	0	3	0	0	1	1	0	0	1	0	0	0	0	0	1	1	3	0	0	0	0	0	2	1	0	0	1
OTU_838	1	5	6	4	1	2	0	3	0	0	2	1	3	4	2	2	2	0	0	3	0	1	2	3	2	3	0	4	2	2	0	1	3	2	0	2	0	2	0	1	2	0	3	0	2	3	0	3	0
OTU_2105	0	0	0	0	1	1	0	0	1	0	0	1	1	0	0	1	0	1	0	1	0	0	0	0	0	0	0	0	0	0	0	0	0	0	0	0	0	0	0	0	0	0	0	0	0	0	0	0	0
OTU_1008	5	3	1	0	0	2	1	1	2	1	0	0	1	1	0	0	2	0	1	1	0	3	0	0	2	3	1	4	0	0	3	0	0	3	2	0	0	1	7	0	3	0	2	1	0	0	0	0	0
OTU_2477	0	0	0	0	0	0	0	0	0	0	0	0	0	0	0	0	0	0	0	0	0	0	0	0	0	0	0	0	0	1	0	0	0	0	0	0	0	1	0	0	0	0	0	0	0	0	0	0	0
OTU_520	0	3	2	0	1	0	0	2	1	0	1	3	3	2	0	2	3	0	1	3	3	6	2	0	0	5	2	2	2	2	2	0	1	1	1	4	0	1	1	2	0	1	4	1	0	2	0	0	3
OTU_12	13	24	9	13	9	12	6	13	14	6	8	11	16	23	5	13	16	4	5	10	10	15	9	3	20	12	9	9	19	4	15	10	11	9	12	18	9	8	17	14	14	5	12	4	11	4	5	24	17
OTU_20	15	8	3	33	12	16	8	0	9	8	6	8	11	9	2	3	7	4	5	3	6	7	4	2	14	17	22	27	3	2	1	1	3	3	9	16	29	13	7	11	3	1	1	10	27	12	2	27	3
OTU_321	1	2	1	5	0	1	5	0	2	2	2	2	1	2	0	1	5	0	0	1	0	3	1	0	3	2	4	1	0	0	1	0	1	3	4	2	1	6	1	1	1	0	0	1	6	1	0	2	2
OTU_1407	0	0	0	0	0	0	0	1	0	0	0	0	2	0	0	2	3	0	0	1	0	0	0	0	0	0	0	0	2	0	1	0	0	0	0	0	0	0	0	1	2	0	0	0	0	0	0	1	1
OTU_2513	2	0	0	1	0	0	0	0	0	0	0	0	0	0	0	1	1	0	0	0	1	0	0	1	0	0	0	0	1	0	0	0	0	0	0	0	0	2	0	1	0	0	0	1	0	0	0	0	1
OTU_644	0	0	0	0	0	2	0	0	2	0	1	3	0	0	0	1	1	1	0	1	0	2	0	0	0	0	0	2	2	0	2	1	0	0	1	0	1	0	1	0	0	0	0	0	2	0	0	2	0
OTU_1363	0	0	1	0	0	3	0	0	0	0	1	0	0	0	2	3	0	0	0	0	0	0	0	0	0	0	0	0	0	0	0	0	0	0	0	0	0	0	0	0	0	0	0	0	0	0	0	0	0
OTU_2240	0	0	0	0	0	0	0	3	0	0	0	0	0	0	0	0	0	0	0	0	0	0	0	0	0	0	0	0	0	0	0	0	0	0	0	0	0	0	0	0	0	0	0	0	0	0	0	0	0
OTU_268	3	12	4	6	4	3	2	1	5	2	1	3	1	6	3	6	1	4	0	2	0	3	2	6	2	6	0	3	2	1	5	5	1	0	2	10	4	5	2	4	4	2	3	3	2	1	0	1	3
OTU_1514	0	0	1	0	0	0	0	1	0	0	0	0	0	0	0	0	0	0	0	0	0	0	0	0	0	1	0	0	0	0	0	0	1	0	0	1	0	0	0	0	0	0	0	0	0	0	0	0	0
OTU_543	0	6	3	0	2	1	1	5	4	0	2	5	1	1	0	1	2	0	1	2	0	2	1	0	4	3	3	1	4	6	1	1	2	1	3	4	1	2	3	2	3	2	3	2	0	1	0	1	1
OTU_855	0	1	0	2	0	0	0	2	0	1	0	3	0	1	2	0	1	0	1	0	0	2	0	2	0	3	0	0	1	0	0	0	0	0	0	3	0	2	2	0	3	0	0	1	0	0	1	0	0
OTU_91	4	7	2	2	1	4	1	7	4	5	5	0	5	0	1	0	3	1	1	0	0	2	3	1	4	4	4	2	2	6	0	3	1	8	0	1	2	4	0	2	0	1	0	4	0	2	1	1	1
OTU_1790	0	0	0	2	0	1	1	0	0	1	0	0	1	0	0	0	1	0	0	0	0	0	2	0	2	1	0	0	0	1	0	0	0	2	0	0	0	0	0	0	1	0	3	1	0	3	0	0	0
OTU_1770	0	2	0	0	1	1	0	0	0	0	0	0	1	3	0	0	1	0	0	1	0	1	0	0	0	0	1	1	0	0	1	0	0	0	0	0	0	0	1	0	0	0	0	1	2	1	0	1	0
OTU_1362	0	0	0	0	0	0	0	0	0	0	0	0	0	0	0	1	0	0	0	0	0	0	0	1	0	0	0	0	0	0	0	0	0	0	0	0	0	0	1	0	0	0	0	0	0	0	0	0	0
OTU_181	1	6	4	18	1	1	0	0	10	0	1	2	12	6	3	4	4	0	1	0	5	4	0	0	10	6	2	3	0	1	3	0	0	0	14	0	1	14	1	1	0	0	1	0	3	0	0	0	5
OTU_302	10	1	4	7	2	4	2	7	0	2	1	3	3	3	0	1	6	4	4	2	4	0	4	8	5	7	0	4	4	7	1	5	1	2	3	5	1	3	5	2	3	0	1	2	0	2	1	2	3
OTU_1955	0	0	0	0	0	0	0	1	0	0	0	1	0	0	1	0	0	1	0	0	0	0	0	0	0	0	0	1	0	0	0	0	0	0	2	0	1	0	1	0	0	0	0	0	0	0	0	0	0
OTU_471	0	2	3	0	2	1	0	2	0	3	0	1	1	3	1	3	1	1	0	0	1	1	1	7	0	4	1	1	2	5	0	1	5	1	2	0	0	0	0	5	1	3	1	1	1	0	0	5	0
OTU_236	3	8	1	4	1	2	2	2	10	0	6	3	12	5	1	10	8	5	5	7	0	3	1	2	2	4	7	6	5	4	9	0	1	7	4	2	3	4	0	2	3	2	0	5	2	3	0	3	13
OTU_2570	3	8	7	1	2	1	2	2	4	4	1	2	3	5	0	6	7	0	0	1	1	3	2	1	8	6	0	4	1	2	1	6	4	10	1	4	1	5	2	2	2	2	1	5	5	2	0	2	7
OTU_698	2	0	1	0	0	0	0	0	0	0	0	0	0	0	0	0	0	0	1	0	0	0	0	0	1	1	1	0	1	0	1	1	1	0	0	0	0	1	0	3	0	0	1	0	2	0	0	1	2
OTU_412	0	2	0	2	0	0	0	1	1	0	0	0	1	2	1	0	0	0	0	1	1	2	0	1	0	3	0	1	4	0	1	0	1	5	2	0	2	0	0	0	1	5	0	0	0	2	2	1	1
OTU_938	1	0	5	0	2	0	0	3	1	2	1	0	2	1	0	4	10	1	1	2	2	4	1	0	3	4	0	4	2	0	3	1	4	2	4	1	2	2	6	5	2	1	1	0	2	0	0	7	1
OTU_233	1	8	0	3	1	0	2	2	2	0	1	2	0	1	0	1	1	0	1	2	1	3	0	1	0	5	0	0	3	2	1	0	0	0	2	0	1	1	3	1	1	0	0	1	1	0	0	2	3
OTU_437	2	1	4	10	6	3	0	5	2	3	6	5	2	4	1	1	1	2	2	2	9	0	4	2	8	3	0	9	5	3	3	1	3	3	3	6	2	7	1	3	0	0	2	7	1	1	5	3	2
OTU_726	3	5	0	2	1	2	2	2	0	1	0	3	6	1	0	1	6	2	0	3	3	0	3	3	3	1	5	1	2	0	0	0	0	0	2	3	3	3	1	0	5	0	0	2	1	2	1	2	2
OTU_956	0	3	0	1	1	4	0	0	0	0	1	0	0	1	0	0	1	1	1	0	2	1	2	1	2	3	0	1	0	2	0	0	0	3	0	0	1	3	1	0	1	5	0	10	0	1	0	1	2
OTU_1620	0	4	2	3	0	0	0	0	0	0	0	2	0	0	0	1	0	0	0	0	1	0	2	0	3	2	0	0	0	0	0	0	0	0	0	0	2	2	1	0	0	0	1	3	2	0	0	0	0
OTU_2250	0	0	0	0	0	0	0	0	0	0	0	0	0	0	0	0	0	0	0	0	0	0	0	0	0	0	0	0	0	0	0	0	0	0	0	0	0	0	0	0	0	0	0	0	0	0	0	0	0
OTU_2579	1	0	0	1	0	0	0	0	0	0	0	0	0	0	0	1	0	1	0	0	0	0	0	0	1	1	0	0	0	0	0	0	0	1	0	0	0	0	0	0	0	0	0	0	0	0	0	0	0
OTU_525	0	6	1	6	2	3	1	1	3	4	1	7	1	1	2	3	0	0	1	0	0	1	4	1	2	3	0	1	1	1	1	1	1	1	0	1	2	4	0	2	1	2	0	2	1	3	0	0	0
OTU_341	1	4	1	0	1	2	1	3	0	0	0	2	2	0	2	0	1	1	2	0	1	0	2	4	0	0	2	4	3	3	0	4	2	0	0	0	1	0	4	0	2	1	1	1	2	0	0	0	2
OTU_2386	0	0	0	1	1	0	0	0	0	0	0	0	0	0	0	0	0	0	0	0	0	0	0	0	0	0	0	0	0	0	0	0	0	0	0	0	0	0	0	0	0	0	0	0	0	0	0	0	0
OTU_980	0	1	0	0	0	0	2	1	1	0	0	0	0	0	0	0	0	0	0	0	1	1	0	0	0	1	0	1	0	1	0	0	1	3	0	2	0	0	0	0	0	0	1	0	0	0	0	1	2
OTU_596	3	2	1	1	1	2	1	1	1	3	2	0	0	3	2	0	3	0	0	0	1	2	0	1	3	1	1	2	0	2	0	0	0	1	4	2	0	1	0	1	0	2	1	2	0	0	2	1	2
OTU_443	2	1	1	1	0	0	0	1	0	0	2	0	2	1	0	2	2	0	0	8	2	0	0	0	0	0	2	1	0	1	0	0	0	0	0	1	0	0	0	2	2	0	1	0	1	0	0	2	2
OTU_189	3	24	17	17	3	9	9	10	5	5	4	6	11	10	5	10	5	0	9	16	3	11	8	3	10	8	17	16	2	2	6	1	8	3	15	4	9	7	6	0	5	5	8	4	3	5	1	10	15
OTU_783	3	0	0	0	0	0	3	0	0	0	0	0	0	0	1	0	0	0	0	0	0	0	0	1	1	0	1	1	0	0	0	0	0	0	0	0	0	5	0	0	2	0	0	2	1	2	0	0	0
OTU_239	4	15	2	2	2	6	1	10	7	1	5	4	6	5	1	7	8	3	2	3	5	4	5	1	11	6	4	3	5	4	6	4	5	2	4	6	2	4	1	3	4	5	2	4	1	0	2	4	4
OTU_883	0	0	2	3	0	0	1	0	1	1	4	0	0	2	1	0	1	0	0	0	0	0	1	0	4	1	0	0	0	0	0	0	0	1	1	0	0	1	1	2	0	3	0	0	2	1	0	0	0
OTU_2247	0	1	0	0	0	0	0	0	0	2	1	0	0	0	0	0	0	0	0	0	0	0	0	0	1	0	0	0	0	0	0	0	0	0	0	0	0	0	0	0	0	0	0	0	0	0	0	0	0
OTU_621	2	8	5	3	0	3	2	1	4	0	1	2	0	3	0	1	1	3	0	0	0	0	3	3	1	7	0	3	1	2	0	3	2	5	5	0	1	1	2	4	1	5	0	3	2	0	1	2	1
OTU_2234	0	0	0	1	0	0	0	0	0	0	0	0	0	0	0	0	0	0	0	0	0	0	0	0	0	0	0	0	0	0	0	0	0	0	0	0	0	0	0	0	0	0	0	0	0	0	0	0	0
OTU_186	3	10	3	5	2	3	1	4	2	1	1	3	2	2	6	2	2	4	1	2	6	1	1	2	9	7	8	6	5	1	1	0	7	2	3	5	3	5	4	4	7	0	3	3	3	4	0	3	3
OTU_143	3	0	1	3	3	2	0	1	3	2	1	0	3	1	2	1	1	4	0	3	3	2	1	1	4	5	1	5	2	0	9	1	5	0	2	1	1	5	1	2	1	0	2	1	0	2	1	2	2
OTU_287	1	10	11	8	4	1	0	13	2	0	2	5	7	8	4	15	14	2	8	7	13	4	1	0	9	4	11	3	3	3	3	0	0	0	6	7	9	3	4	8	7	0	1	1	6	9	0	18	13
OTU_477	1	6	9	1	1	0	0	4	1	0	0	0	2	2	1	5	2	1	0	1	1	4	1	1	0	0	5	2	0	1	1	2	0	1	2	0	0	0	0	2	0	0	1	0	0	3	0	0	7
OTU_120	15	37	15	10	5	7	4	17	11	9	9	9	14	11	13	14	8	5	12	13	10	23	6	12	9	9	11	9	9	10	10	7	30	4	11	10	10	10	10	17	13	3	7	6	9	9	5	19	20
OTU_1880	0	3	0	0	0	1	0	4	0	0	0	0	0	0	0	0	0	0	0	0	0	1	0	0	0	0	0	0	0	0	2	0	1	0	0	1	0	0	0	0	0	0	1	0	0	0	0	0	0
OTU_306	0	2	4	1	4	0	0	4	4	0	2	14	4	3	1	3	3	0	0	0	6	14	0	0	0	0	3	0	4	1	2	0	6	0	2	3	1	1	13	1	3	0	1	0	2	13	0	8	0
OTU_353	1	5	1	3	1	2	3	0	3	0	0	5	0	3	4	1	1	0	0	0	0	1	1	0	0	2	1	6	0	2	2	1	2	0	3	0	0	8	1	1	4	0	0	2	0	1	0	5	3
OTU_721	0	3	0	1	0	0	0	0	1	0	0	0	0	0	0	1	0	0	0	0	0	0	0	0	1	0	0	0	0	1	0	0	0	0	0	0	0	0	0	0	0	0	1	0	0	0	0	0	0
OTU_288	2	5	0	2	1	2	0	2	3	2	1	0	1	1	0	1	3	2	1	1	3	6	4	4	3	0	4	0	0	2	4	5	4	1	0	3	2	5	0	0	4	2	2	0	0	0	1	1	7
OTU_384	8	10	30	9	5	5	6	7	5	0	1	7	10	3	6	7	8	2	4	4	4	2	3	2	2	3	6	5	5	6	8	0	11	0	3	3	3	6	7	2	7	1	2	6	7	3	9	6	2
OTU_146	2	8	7	1	1	7	3	9	6	12	4	6	2	2	8	7	3	6	4	4	7	2	7	4	6	12	0	3	2	9	2	4	1	2	3	5	3	2	10	5	13	1	2	17	4	4	3	7	3
OTU_661	0	3	5	0	0	1	1	2	2	0	1	4	1	0	0	1	0	0	0	3	7	2	3	2	0	3	1	0	0	10	1	2	0	1	1	0	1	1	3	0	1	3	0	0	1	2	2	4	3
OTU_2135	0	0	0	0	0	0	0	0	0	0	0	0	0	0	0	0	0	0	0	0	0	0	0	0	0	0	0	0	0	0	3	0	0	0	0	0	0	0	0	0	0	0	0	0	0	0	0	0	0
OTU_618	2	4	3	3	0	2	0	1	1	4	0	0	0	6	5	1	3	0	0	1	0	2	1	0	4	1	1	2	0	2	0	1	0	3	2	1	2	3	1	1	1	6	0	1	2	1	2	1	5
OTU_1415	0	2	0	4	1	2	0	0	2	0	0	1	0	2	2	0	0	0	0	0	0	0	0	0	0	0	0	0	0	0	0	0	1	0	0	5	0	1	2	3	2	3	0	2	1	2	2	0	1
OTU_114	15	32	26	33	21	19	10	20	34	25	30	9	24	29	2	29	18	12	9	8	21	9	14	13	23	34	8	24	15	52	16	12	14	5	19	21	28	12	37	24	34	2	7	21	29	11	14	18	14
OTU_105	4	2	6	2	3	4	2	0	8	5	1	6	0	1	1	1	2	2	0	2	1	0	1	4	2	15	2	13	1	2	1	2	5	1	0	0	5	13	1	1	0	0	0	9	0	2	4	1	2
OTU_599	1	3	21	2	1	0	2	1	0	5	0	7	2	3	1	2	4	0	1	3	3	0	0	2	1	4	4	2	0	0	1	0	1	2	5	2	0	2	2	2	0	1	1	2	0	0	0	7	2
OTU_1763	0	2	1	0	0	1	0	0	0	0	0	0	0	0	0	1	0	0	0	1	0	1	0	0	1	0	0	1	0	0	0	0	0	0	0	0	0	0	1	0	0	1	0	1	0	0	0	0	0
OTU_557	0	2	0	2	0	4	4	0	0	8	1	2	0	1	0	0	0	2	0	0	0	0	1	0	4	5	0	2	0	0	0	0	0	0	1	0	1	0	0	0	0	0	0	7	0	0	2	0	0
OTU_673	1	1	3	4	3	1	2	3	1	0	1	0	4	1	0	3	0	3	2	4	4	2	1	1	13	2	2	8	1	3	3	2	2	8	1	6	1	5	1	0	2	8	4	5	4	1	1	1	1
OTU_389	3	3	0	0	1	3	3	0	2	0	0	4	0	2	0	0	1	1	0	0	3	3	1	2	1	5	0	2	3	0	2	1	1	0	1	8	2	3	1	2	1	1	1	4	1	2	0	5	0
OTU_793	1	0	1	2	0	0	0	0	1	0	1	4	0	0	0	2	0	1	0	0	0	0	0	1	2	1	0	0	0	1	0	1	0	0	0	0	0	0	0	2	1	0	1	0	4	0	1	0	1
OTU_383	2	6	4	0	0	0	1	1	2	2	0	2	1	2	2	2	3	1	2	4	0	3	1	0	1	3	0	1	1	1	1	1	1	0	0	0	1	1	1	1	3	1	2	3	0	0	0	3	2
OTU_2480	0	1	2	2	0	0	0	0	0	1	0	5	0	1	0	2	0	0	0	0	1	0	0	1	0	1	0	2	0	0	0	0	0	0	0	0	2	1	1	0	0	0	0	0	1	0	0	0	0
OTU_1317	2	2	0	6	2	9	1	1	2	7	1	2	0	0	2	0	0	0	0	1	3	0	1	0	7	5	2	7	0	2	1	1	1	1	0	8	4	1	3	4	1	1	1	1	1	0	1	0	1
OTU_770	2	2	8	2	0	1	1	2	0	0	0	9	0	1	1	0	0	1	1	0	0	0	1	0	4	1	0	1	1	0	0	0	0	0	0	1	1	1	0	0	0	1	0	1	0	0	0	0	0
OTU_642	1	0	0	1	0	0	2	0	0	2	3	1	0	0	0	1	0	1	0	0	0	0	0	2	0	2	0	1	0	0	2	0	0	1	0	1	0	1	0	0	0	2	0	4	0	0	4	0	0
OTU_603	0	7	2	0	0	1	2	1	0	1	0	0	9	1	0	3	2	1	0	2	2	2	2	1	0	0	1	4	0	1	1	2	6	0	2	4	0	0	0	0	5	0	4	0	0	5	0	1	3
OTU_982	0	2	1	0	0	0	0	0	2	0	0	0	1	1	0	1	3	0	0	1	1	0	0	1	1	0	0	0	0	0	0	0	0	0	0	0	0	0	0	1	3	0	0	0	1	1	0	1	1
OTU_1653	0	3	0	0	0	0	0	0	0	0	0	0	3	0	0	0	0	0	0	0	0	0	0	0	0	0	1	0	0	0	0	0	2	0	0	0	0	0	0	0	1	0	0	0	0	0	0	1	0
OTU_629	5	9	11	12	5	9	13	3	10	0	7	10	4	6	2	3	9	6	6	4	6	8	3	6	4	9	4	5	8	2	9	4	1	0	6	7	11	5	4	7	6	5	3	6	8	0	1	6	7
OTU_478	2	1	3	1	1	0	0	5	1	0	0	1	4	0	0	4	1	1	2	1	6	5	0	0	0	0	1	1	0	0	4	1	1	0	1	2	0	0	1	0	3	0	0	0	0	0	0	5	4
OTU_993	3	0	2	1	0	1	0	1	4	2	2	2	1	2	1	2	1	0	0	0	0	2	0	0	0	2	1	2	0	1	0	1	0	1	0	1	0	2	1	0	1	0	0	1	2	0	0	1	0
OTU_364	1	2	2	0	1	0	1	4	1	0	0	3	6	1	0	0	1	0	2	0	0	3	0	0	1	0	2	0	2	0	1	0	0	0	2	0	1	0	1	1	0	0	0	0	1	0	0	1	2
OTU_148	1	2	4	5	6	4	4	1	4	1	1	4	0	6	0	2	4	0	0	1	2	1	0	3	3	14	0	3	2	0	3	1	3	1	2	4	1	2	0	2	2	0	0	10	4	1	1	1	0
OTU_678	1	1	0	0	0	0	2	0	1	0	0	1	0	0	0	0	0	6	0	0	0	0	0	0	0	0	0	0	0	0	0	0	0	1	0	1	0	1	0	0	0	0	0	0	0	0	1	0	0
OTU_363	0	2	1	8	0	0	1	0	3	1	0	0	0	1	0	6	0	0	0	0	1	0	0	1	0	3	0	1	0	0	1	0	0	0	0	0	5	0	1	1	0	0	1	0	0	1	0	0	0
OTU_109	5	8	1	14	1	8	6	1	5	2	3	9	8	8	3	9	2	7	3	9	4	3	8	1	1	11	8	10	2	4	2	3	2	5	8	4	1	9	3	1	3	5	3	10	5	0	2	8	3
OTU_447	3	3	7	10	2	8	1	2	3	1	4	8	2	5	1	4	4	2	7	2	2	1	6	2	1	9	2	2	1	1	1	7	1	0	0	10	4	12	3	6	4	2	1	5	2	2	1	2	7
OTU_473	1	6	4	2	1	2	1	1	2	1	2	2	1	7	0	3	1	0	1	2	2	1	4	5	1	3	2	4	3	4	0	4	0	1	3	2	1	2	5	0	1	4	0	19	0	2	0	3	10
OTU_538	0	3	0	0	0	3	1	0	0	0	0	0	0	0	0	0	0	2	0	0	0	0	0	1	1	3	0	7	0	0	0	3	0	5	0	0	0	0	0	2	0	3	0	3	0	0	1	0	1
OTU_309	0	5	1	0	0	0	0	3	0	0	1	0	3	1	0	4	1	0	0	1	1	1	0	0	0	0	4	0	4	0	0	0	0	0	1	3	0	0	2	1	3	0	1	0	0	2	0	6	1
OTU_1821	0	4	0	1	2	2	0	1	4	1	0	0	1	3	2	1	1	3	0	1	0	0	1	1	1	2	0	5	1	0	1	2	0	4	2	2	1	1	2	2	2	0	1	9	1	1	0	1	1
OTU_1086	0	0	0	0	0	0	0	0	0	0	0	0	0	0	0	0	0	0	0	0	0	0	0	0	0	0	0	0	0	0	0	0	0	0	0	0	0	0	0	0	0	0	0	0	8	0	0	0	0
OTU_1316	0	0	0	0	1	1	1	1	0	1	1	2	0	0	0	0	0	1	0	0	2	0	3	2	1	1	0	2	0	0	0	0	1	0	0	2	0	0	1	1	0	0	0	2	1	1	1	0	0
OTU_145	2	4	2	1	0	1	0	5	12	0	1	1	7	4	1	12	6	2	1	1	3	7	1	0	1	1	4	11	1	2	3	3	5	0	4	1	5	0	4	12	3	0	0	1	0	1	2	8	7
OTU_772	0	2	2	0	0	0	0	0	0	0	0	0	0	0	0	5	0	0	0	2	0	2	0	0	0	0	0	0	0	3	1	0	0	0	0	0	0	0	0	0	0	0	0	0	0	0	0	0	4
OTU_983	0	1	0	5	0	0	1	1	0	0	0	1	0	0	0	0	0	0	0	0	1	0	1	0	2	0	0	0	2	0	0	1	2	0	1	0	1	1	0	0	1	0	0	0	0	0	0	1	0
OTU_350	1	12	5	4	1	5	5	1	0	1	2	2	0	1	0	2	1	1	1	1	1	4	3	0	2	3	1	1	1	3	3	4	1	0	0	0	0	3	5	1	0	0	0	0	1	0	1	1	1
OTU_169	0	2	1	2	2	2	0	0	1	1	0	0	4	1	2	1	5	5	2	2	3	3	12	1	0	6	1	5	4	1	1	3	4	1	1	9	1	1	2	3	4	0	4	1	3	0	1	1	0
OTU_1422	0	1	2	0	1	0	1	1	0	1	0	1	1	0	0	0	0	1	0	0	0	4	0	0	0	2	0	1	0	2	0	0	0	0	0	2	0	2	2	0	10	0	1	0	2	0	0	0	1
OTU_284	0	0	3	0	4	0	0	7	1	0	0	0	9	1	1	10	1	0	0	2	1	4	0	0	0	0	3	2	0	2	2	1	2	0	2	2	2	0	5	0	2	0	1	0	0	1	0	1	6
OTU_339	0	2	7	0	1	0	0	1	3	0	1	1	5	3	0	5	3	2	3	1	0	4	2	0	2	3	3	0	1	0	0	3	2	10	1	0	2	0	3	1	2	7	4	0	4	1	2	2	1
OTU_955	0	1	0	0	0	1	0	0	0	0	1	0	0	0	0	0	0	2	0	0	0	0	0	0	1	0	0	0	0	0	0	0	0	0	0	0	0	0	0	1	0	0	0	0	0	0	0	0	0
OTU_2214	1	1	1	0	1	1	0	1	3	0	1	0	1	0	1	0	0	1	0	0	0	0	1	2	0	1	0	1	1	0	3	1	3	2	0	3	0	1	0	0	0	0	0	0	0	1	0	2	0
OTU_1686	0	0	0	0	0	0	0	0	0	0	0	0	0	0	0	0	0	0	0	0	0	0	0	0	0	2	0	0	0	0	0	0	0	0	0	0	0	0	0	0	0	0	0	0	0	0	1	0	0
OTU_453	3	8	2	3	2	2	2	8	3	2	1	2	0	7	1	8	2	6	2	3	2	1	1	2	3	4	2	2	2	0	2	2	2	8	4	2	2	1	1	4	4	0	2	2	2	0	3	4	2
OTU_1768	0	0	0	0	0	0	1	0	0	0	0	1	0	0	0	1	0	1	0	0	0	0	0	0	1	0	0	1	0	0	0	0	0	0	0	0	0	0	0	0	0	0	0	1	1	0	0	0	0
OTU_745	2	8	2	1	1	1	1	2	5	1	1	0	0	3	0	2	1	1	0	1	2	1	0	0	3	5	0	2	3	0	0	1	1	0	0	1	6	3	2	0	2	1	1	1	0	0	2	3	2
OTU_1771	0	0	0	0	0	0	0	0	0	0	0	0	0	0	0	0	0	0	0	0	0	2	0	0	0	1	0	0	0	1	0	0	0	0	0	0	0	0	0	0	0	0	0	0	0	0	0	0	0
OTU_161	0	13	6	9	10	0	1	3	3	7	4	4	6	5	1	3	11	7	3	8	5	11	1	0	6	9	0	0	5	1	4	0	7	0	1	7	8	4	16	3	0	0	1	2	4	5	0	2	5
OTU_1171	1	3	1	1	1	1	1	0	0	0	2	0	2	1	0	2	4	2	0	1	0	3	1	2	2	1	1	4	2	1	4	1	4	0	6	2	3	2	2	1	10	0	2	2	2	0	0	3	8
OTU_157	6	10	2	11	3	0	3	4	5	2	7	5	3	8	0	5	3	6	1	3	6	1	3	4	16	14	2	10	3	0	1	5	3	6	2	7	4	14	4	3	5	2	2	10	3	1	5	4	2
OTU_201	1	7	5	13	6	2	5	2	9	0	5	3	1	4	3	1	5	4	1	2	8	1	0	1	10	10	1	12	2	0	2	0	0	0	1	4	6	6	0	6	3	0	3	1	6	5	0	4	0
OTU_522	0	3	0	1	0	2	1	1	0	1	0	0	1	0	0	0	0	0	0	0	0	1	0	3	1	1	0	0	0	2	2	0	1	3	0	2	0	1	0	0	0	3	0	0	0	0	0	0	2
OTU_949	1	0	0	0	0	0	0	0	0	0	1	0	0	0	0	2	0	0	0	0	0	0	0	1	0	0	0	1	1	0	0	1	0	0	0	0	0	0	0	1	0	0	0	0	0	0	0	0	0
OTU_39	6	16	4	10	3	6	5	5	11	1	4	11	7	11	1	9	3	3	6	3	2	9	2	1	6	9	3	15	5	5	3	2	7	1	5	2	13	9	6	4	4	0	0	3	8	2	2	6	7
OTU_1398	0	0	0	0	0	0	0	0	0	0	0	0	0	0	0	5	0	0	0	0	1	1	0	0	0	0	0	0	0	0	0	0	0	0	0	0	1	0	0	0	0	0	0	0	0	0	0	0	0
OTU_1505	0	0	0	0	0	0	0	0	0	0	0	0	0	0	0	0	0	0	0	0	0	0	0	0	0	6	0	0	0	0	0	0	0	0	0	0	0	0	0	0	0	0	0	0	0	0	0	0	0
OTU_252	1	4	4	0	0	4	1	2	8	0	0	0	1	3	2	3	4	0	1	1	0	4	0	1	1	5	2	2	0	5	7	1	7	0	4	0	2	2	0	0	1	2	1	1	9	1	1	1	7
OTU_158	6	4	2	2	4	3	6	25	3	2	1	5	2	2	1	0	1	4	0	0	1	1	4	4	5	6	0	9	2	2	2	4	0	3	1	3	2	6	1	3	1	1	1	9	0	1	3	1	0
OTU_561	1	0	1	1	1	1	0	0	0	0	2	2	0	0	1	0	1	1	0	0	0	0	0	0	0	3	0	2	0	1	2	0	1	0	0	0	0	1	0	0	0	1	0	1	1	0	0	0	1
OTU_261	0	1	2	2	0	0	2	0	1	0	0	4	0	5	0	1	0	0	0	7	1	0	0	1	2	6	0	6	0	0	0	0	0	1	0	0	0	2	0	2	0	2	0	5	0	0	0	1	0
OTU_511	0	1	1	2	1	1	0	0	0	1	0	1	2	0	0	1	0	2	1	0	0	1	0	4	1	1	1	1	1	0	0	2	0	0	0	1	0	1	0	1	0	1	0	3	2	0	1	0	0
OTU_329	1	6	5	7	2	2	2	1	3	0	2	5	0	2	0	3	1	0	2	2	3	0	1	0	6	1	2	13	1	0	2	0	0	0	1	1	0	2	2	0	0	4	0	1	9	7	0	2	2
OTU_69	5	28	18	13	4	7	1	26	22	3	19	9	16	10	6	14	22	10	2	8	12	18	11	9	13	13	12	33	12	30	5	20	12	4	20	14	19	4	9	23	8	5	12	8	20	7	2	17	10
OTU_672	3	9	3	3	2	10	3	6	6	1	2	5	5	5	0	4	4	2	1	1	5	2	5	9	5	5	2	5	2	4	2	1	6	15	1	5	9	2	9	4	3	10	3	1	2	1	1	1	4
OTU_684	1	1	0	3	2	1	1	0	0	0	0	0	0	0	1	1	0	0	0	1	0	0	2	0	0	3	0	3	0	0	0	0	0	2	0	0	2	0	1	0	0	4	0	1	0	4	0	0	1
OTU_368	0	7	1	14	1	0	1	2	0	0	1	3	18	0	1	0	4	3	0	7	7	1	11	0	7	3	9	1	0	9	5	6	7	5	7	1	4	13	1	0	2	3	3	2	2	0	2	4	2
OTU_498	0	0	1	2	0	2	0	1	0	0	1	0	1	0	1	0	2	0	0	0	2	0	1	0	2	2	0	2	1	4	0	1	1	1	0	0	0	0	2	1	0	0	0	0	0	0	1	2	0
OTU_944	0	4	0	1	0	0	0	1	2	0	0	1	0	1	0	1	1	2	0	1	0	2	2	1	0	0	0	0	0	0	0	3	1	1	0	0	1	0	1	0	0	0	3	0	1	0	0	1	2
OTU_1097	3	12	5	11	1	9	4	5	2	3	6	4	4	12	1	3	2	5	0	4	2	6	3	8	3	6	3	6	2	5	5	1	2	6	3	6	8	7	3	5	9	1	1	7	3	0	2	3	1
OTU_581	1	2	1	5	0	0	0	0	0	2	1	1	0	2	0	0	0	1	2	0	0	1	0	0	1	4	0	3	0	0	0	0	0	0	1	0	0	2	0	2	1	0	0	0	0	0	0	0	0
OTU_865	0	0	3	1	0	2	1	1	1	0	0	1	7	0	1	0	1	0	0	2	0	2	0	0	0	0	1	1	0	0	0	0	1	0	0	0	0	0	0	1	1	0	0	0	0	1	0	1	0
OTU_1014	0	16	2	1	1	0	0	0	1	2	0	1	1	0	0	3	3	0	1	1	1	2	0	1	0	0	1	0	3	0	1	0	1	0	4	1	1	1	0	1	0	0	0	0	1	0	1	0	4
OTU_1172	1	0	1	1	0	0	0	0	0	1	1	3	0	0	0	0	0	0	0	0	0	0	0	0	2	0	0	0	0	0	0	0	0	0	0	1	0	1	0	1	0	0	0	2	0	0	0	0	0
OTU_623	0	3	2	4	0	5	0	0	0	2	1	6	0	1	0	1	0	2	1	0	0	0	0	3	1	4	0	4	0	1	1	1	0	2	2	4	6	1	0	1	0	1	1	1	2	0	1	0	2
OTU_521	0	0	0	0	0	1	0	0	0	1	3	1	1	2	0	0	0	2	0	3	0	0	1	1	0	2	0	2	0	1	3	1	0	1	0	0	2	1	1	0	0	1	0	0	1	0	0	0	1
OTU_275	7	4	5	10	1	2	6	9	2	4	1	14	6	7	5	3	10	6	1	2	4	3	10	3	8	11	2	6	6	8	3	3	4	0	2	1	7	11	10	6	4	2	2	11	3	4	7	6	8
OTU_859	0	0	0	0	0	0	0	0	1	0	0	5	0	0	0	0	0	0	0	0	2	0	0	0	3	0	0	0	0	0	0	0	1	0	0	0	0	2	0	1	0	0	0	0	0	2	0	0	1
OTU_700	1	1	3	0	0	2	0	0	2	2	0	0	1	2	0	4	0	1	2	2	0	3	0	0	0	1	1	1	0	3	2	0	2	1	4	0	0	0	0	0	5	1	1	0	0	0	0	7	2
OTU_720	0	0	1	0	0	0	0	2	0	0	0	0	0	1	1	0	1	0	0	0	1	0	0	0	0	0	0	0	0	0	0	0	1	0	0	0	0	0	2	0	0	0	1	0	0	0	0	1	3
OTU_1548	1	4	7	3	3	0	1	4	1	2	3	2	1	4	1	1	1	2	3	0	1	0	3	2	1	5	0	1	1	2	0	1	0	3	2	1	0	2	0	2	0	3	1	2	1	0	1	3	1
OTU_397	5	7	6	2	0	2	0	4	6	0	1	3	2	3	2	4	1	1	2	1	0	3	1	5	2	5	1	1	4	2	0	2	0	0	3	2	3	3	3	3	2	1	1	1	0	5	1	3	3
OTU_633	2	0	2	0	0	0	0	1	0	0	0	0	2	0	0	0	0	3	0	2	0	2	0	0	0	0	0	1	0	1	0	0	0	0	2	0	0	1	0	0	0	0	0	0	0	0	0	2	0
OTU_481	0	5	4	0	0	0	2	1	0	1	0	2	0	0	0	0	0	2	2	0	0	0	0	0	4	2	0	0	1	0	0	1	0	0	0	0	0	0	2	0	1	0	3	1	0	1	0	0	0
OTU_1499	2	4	3	2	0	5	0	0	2	0	2	3	1	4	0	3	1	5	1	1	2	0	2	1	2	6	0	4	5	3	0	1	1	3	0	6	3	5	2	3	1	6	2	4	1	2	1	1	0
OTU_987	1	3	0	0	0	2	0	0	2	0	0	0	2	1	0	2	1	0	1	1	0	0	0	0	0	6	0	2	1	0	0	0	1	0	0	3	0	1	0	2	0	1	1	3	0	1	1	1	0
OTU_504	0	6	8	2	0	2	2	5	1	1	0	1	0	4	0	2	2	1	3	2	1	3	0	5	1	4	1	10	2	4	2	2	0	0	0	1	1	4	3	5	2	2	4	1	0	2	2	3	2
OTU_1857	0	0	0	1	0	0	1	0	0	0	0	0	0	0	0	0	0	0	0	1	0	0	0	0	0	1	1	0	0	0	4	0	0	0	0	0	0	0	0	0	0	0	4	0	0	0	0	0	0
OTU_540	0	2	3	1	0	1	5	0	1	0	3	0	1	2	0	1	0	0	1	0	0	0	0	1	1	0	2	1	1	1	1	3	0	2	1	0	0	0	0	1	0	3	1	3	2	1	2	0	2
OTU_652	0	0	2	2	0	1	0	0	0	1	0	1	0	0	0	0	1	0	0	0	0	0	0	0	1	1	0	0	0	0	1	0	0	0	0	0	0	0	0	1	0	1	0	0	1	0	0	1	0
OTU_886	0	2	0	0	2	0	0	0	2	2	1	0	0	0	0	1	2	1	0	0	1	1	1	1	0	1	0	0	1	2	1	2	1	2	0	1	0	1	2	1	0	2	0	3	0	1	0	0	1
OTU_948	1	0	0	1	0	0	0	0	0	0	0	6	0	0	0	0	0	1	0	0	0	0	0	0	0	0	0	0	0	0	0	0	0	0	0	0	1	0	0	0	0	0	0	0	3	0	0	0	0
OTU_262	1	6	3	1	1	0	0	2	4	1	1	2	1	1	1	2	2	1	1	0	2	7	2	3	3	2	3	2	1	1	2	1	1	1	2	2	1	0	5	3	2	0	1	3	3	0	1	4	1
OTU_446	0	8	1	0	0	0	0	0	0	0	4	0	1	0	1	0	1	0	0	1	0	0	0	0	0	3	0	0	2	0	1	0	0	0	2	1	4	0	1	0	1	1	0	0	0	0	0	0	0
OTU_2164	0	0	0	1	0	1	1	0	0	0	1	0	1	1	0	2	0	0	0	0	0	1	0	0	1	0	0	0	0	0	0	0	0	0	0	0	0	0	1	1	0	0	11	0	0	1	0	1	1
OTU_1902	0	0	1	0	1	1	0	0	0	0	0	0	0	1	0	2	1	0	0	1	0	1	0	0	0	1	0	0	0	1	0	0	1	3	0	0	0	1	0	0	0	0	0	1	0	0	0	0	1
OTU_1538	2	0	2	7	0	1	0	1	1	1	0	1	0	0	0	0	0	0	1	0	4	0	1	0	0	1	0	3	1	0	1	1	1	0	1	0	0	2	0	0	1	1	0	5	1	1	0	0	1
OTU_797	0	0	1	1	0	0	0	1	0	0	0	0	1	0	0	1	0	0	0	0	0	1	4	0	0	0	1	0	0	1	0	0	0	0	0	0	0	0	0	0	0	0	0	0	1	0	0	0	0
OTU_436	1	12	5	3	3	5	0	2	4	3	6	5	5	7	2	5	6	2	2	1	5	5	3	2	5	7	0	5	6	0	1	4	1	2	3	6	2	5	6	3	8	4	3	10	3	5	2	6	5
OTU_2523	0	0	0	0	0	0	0	0	0	0	0	0	0	1	0	0	2	0	0	0	0	0	0	0	0	0	0	0	1	0	0	0	0	0	0	0	1	0	0	0	1	0	0	0	0	0	0	0	0
OTU_249	4	1	0	18	11	13	1	1	5	2	1	8	0	4	1	0	2	3	0	0	0	1	0	1	12	14	3	17	0	0	1	0	0	4	0	3	4	17	1	7	0	4	0	0	1	5	1	6	1
OTU_1387	0	0	0	0	1	0	0	1	2	0	0	0	0	0	0	0	0	1	0	0	0	0	0	0	1	0	0	0	0	0	1	0	2	1	1	1	0	0	0	0	1	0	0	0	0	1	0	0	0
OTU_1089	2	2	1	0	1	0	5	0	1	2	4	1	0	4	0	0	1	2	0	0	1	0	2	0	2	2	0	0	0	1	0	0	0	2	0	2	0	3	3	0	1	1	2	0	1	2	1	0	2
OTU_2185	0	0	0	0	0	0	0	0	0	0	0	0	0	0	0	0	0	0	0	0	0	0	0	0	0	0	0	0	0	0	0	0	0	0	1	3	0	1	0	0	0	0	0	0	0	0	0	0	0
OTU_2245	0	0	0	0	0	0	0	0	0	0	0	0	0	0	0	0	0	0	0	0	0	0	0	0	0	0	0	0	0	0	2	0	0	0	0	0	0	0	0	0	0	0	0	0	0	0	0	1	0
OTU_1102	1	1	2	1	0	0	1	0	2	3	0	0	0	0	0	0	0	0	1	0	0	1	0	0	0	10	0	0	0	1	0	0	0	0	0	1	1	0	0	0	0	0	0	0	0	1	3	0	0
OTU_1935	0	0	0	1	0	0	2	0	0	1	0	1	0	0	0	0	0	0	0	0	0	0	0	0	0	2	0	2	0	1	0	0	0	0	0	0	1	0	0	0	0	0	0	0	0	0	0	0	0
OTU_1734	0	2	0	0	1	1	1	1	2	0	2	2	0	0	1	1	1	2	1	2	0	0	1	1	1	1	0	2	1	0	0	0	0	0	0	1	3	2	5	1	0	0	0	2	2	1	1	0	1
OTU_1057	1	1	1	1	1	0	1	0	2	0	0	1	0	1	0	1	0	0	1	0	0	0	0	0	0	2	0	0	1	0	0	0	1	0	0	0	0	0	0	1	0	0	1	3	0	0	0	0	0
OTU_747	2	1	0	1	0	2	0	1	2	0	0	3	2	4	2	3	0	1	1	3	2	0	3	0	1	4	2	0	3	0	3	1	0	0	2	1	0	1	1	4	1	0	2	0	0	0	0	1	5
OTU_319	1	8	1	1	3	4	4	2	2	5	5	4	3	7	1	2	2	4	1	1	0	1	0	1	4	10	3	2	4	1	5	4	4	0	1	13	3	7	3	5	0	0	1	12	10	3	0	9	1
OTU_1676	0	1	0	1	0	0	0	0	0	0	0	0	0	1	0	0	0	0	0	0	0	0	0	0	0	1	0	0	0	0	0	1	0	0	1	2	0	1	1	0	0	0	0	1	0	0	0	0	0
OTU_35	6	12	15	18	3	15	4	4	15	3	11	52	2	12	4	2	3	4	3	1	5	2	4	5	11	32	1	11	8	3	5	3	6	12	1	9	6	15	12	15	3	4	0	14	6	2	10	4	2
OTU_171	4	4	4	6	0	12	0	2	1	0	1	2	0	4	2	1	4	4	3	0	0	2	2	2	6	3	3	6	0	1	1	5	0	4	1	2	7	1	1	2	1	1	0	3	1	1	1	1	5
OTU_501	1	1	2	1	1	0	0	1	3	0	2	4	3	0	0	0	0	0	0	2	0	0	0	0	2	3	1	3	0	0	1	0	0	0	0	2	1	6	3	2	1	1	1	1	0	0	0	0	1
OTU_1065	0	2	0	0	2	0	0	0	0	0	0	0	0	0	0	1	1	0	0	0	0	0	0	0	0	0	0	0	0	0	2	0	0	0	0	0	0	0	1	0	1	0	1	0	0	0	0	0	2
OTU_449	2	1	0	0	1	0	5	0	0	2	0	1	0	1	2	0	0	3	0	0	1	1	0	3	6	3	0	1	1	1	1	1	0	1	0	1	1	5	0	0	2	3	0	2	0	0	0	0	0
OTU_853	0	3	0	0	1	1	0	1	0	0	0	1	1	0	1	1	0	0	1	0	2	1	0	0	0	0	2	0	1	0	6	0	0	0	1	0	0	0	1	1	0	0	2	0	0	1	1	1	3
OTU_379	0	3	0	3	5	1	2	0	3	1	0	3	6	4	2	2	3	0	0	2	3	4	1	1	2	0	0	1	2	4	1	0	2	0	3	2	3	3	4	2	1	0	2	1	2	0	1	3	1
OTU_697	3	8	4	2	2	4	0	4	2	3	0	1	2	3	1	3	1	6	0	1	2	5	0	6	3	3	2	1	1	0	0	0	1	0	0	0	1	4	1	1	1	0	4	0	1	1	0	0	2
OTU_457	0	3	3	2	1	0	1	1	3	5	0	6	2	2	0	2	7	2	0	0	3	0	1	1	2	1	1	0	2	0	4	3	1	7	0	0	1	2	0	1	5	2	1	1	2	0	0	0	0
OTU_494	1	1	0	0	0	3	4	1	3	3	3	3	0	3	0	0	1	0	0	1	1	2	3	1	2	5	0	0	0	1	1	1	0	0	1	0	2	0	0	2	0	1	1	1	0	0	2	1	1
OTU_1179	0	1	0	0	0	0	0	0	0	0	0	0	0	0	0	0	0	0	0	1	0	0	0	0	0	0	0	0	0	0	0	0	0	0	0	1	0	0	0	0	0	0	0	1	0	6	0	0	0
OTU_535	0	3	0	2	2	0	1	1	2	0	2	0	6	0	0	1	2	1	3	1	0	2	2	5	0	0	0	1	2	0	3	0	2	0	2	1	1	0	1	0	1	1	2	2	0	0	1	0	0
OTU_78	0	5	4	15	2	4	7	2	6	0	2	8	2	6	7	3	6	3	0	3	1	2	3	4	10	8	1	6	3	0	2	1	2	0	2	2	9	7	4	2	2	0	0	8	4	6	1	1	4
OTU_75	5	31	20	17	4	4	7	5	18	3	7	28	17	15	7	21	13	1	7	21	13	14	4	4	13	8	9	15	11	7	7	1	7	0	24	6	18	5	26	6	8	0	12	0	11	10	3	14	8
OTU_62	2	8	3	4	3	6	1	9	7	2	4	0	0	9	2	4	4	6	1	1	4	6	3	1	7	6	4	3	3	6	3	0	1	0	1	1	1	3	0	10	3	3	1	7	4	2	6	1	3
OTU_604	6	27	27	4	10	11	5	16	16	6	5	4	10	12	4	22	8	9	8	10	11	16	12	5	13	13	8	8	17	9	6	5	4	11	7	9	13	7	5	15	5	7	12	8	7	3	2	9	21
OTU_2137	0	0	0	0	0	0	0	0	0	0	0	0	0	0	0	0	0	0	0	3	0	0	0	0	0	0	0	0	0	0	0	0	0	0	0	0	0	0	0	0	0	0	0	0	0	0	0	0	0
OTU_1248	0	0	0	1	0	1	0	0	1	0	0	0	1	0	0	0	0	0	0	1	0	1	0	1	0	0	1	0	0	0	1	0	0	0	0	0	0	0	0	0	0	0	0	0	2	1	0	0	2
OTU_334	5	11	5	5	0	3	0	4	2	1	2	4	0	3	1	3	9	3	1	0	0	1	12	4	3	2	2	2	3	6	0	2	0	0	0	4	0	0	4	3	1	2	1	2	6	1	0	4	2
OTU_1960	0	0	0	0	0	0	0	0	0	0	0	0	0	0	0	3	1	0	0	0	0	0	0	0	0	0	2	0	0	0	0	0	0	0	0	1	0	0	0	0	0	0	0	0	0	0	0	0	0
OTU_1373	0	3	0	0	1	1	0	0	1	0	0	0	0	1	1	0	2	1	0	0	0	0	3	2	0	0	0	1	0	1	0	0	0	0	0	0	2	1	0	0	1	2	1	2	1	0	0	0	0
OTU_1853	1	0	0	0	0	0	0	0	0	0	0	0	0	1	0	0	0	0	0	0	0	0	0	0	0	0	0	0	0	0	0	0	0	0	0	0	0	0	0	0	0	0	0	0	0	0	0	0	0
OTU_1271	0	0	0	0	0	0	0	0	0	0	0	0	0	0	0	0	0	0	0	0	0	0	0	0	0	0	0	0	0	0	0	1	0	6	0	0	0	0	0	0	0	0	0	0	0	0	0	0	0
OTU_508	4	2	0	0	3	1	0	0	4	0	0	1	0	0	0	0	0	0	0	0	1	0	0	1	0	0	0	11	0	2	0	0	0	0	0	0	0	0	0	2	0	0	0	0	0	0	0	0	0
OTU_2121	0	0	0	0	1	0	0	0	0	0	0	0	0	1	0	0	0	0	0	0	0	0	0	0	0	0	0	0	0	0	0	2	0	0	0	0	0	1	0	0	0	0	0	1	0	0	0	0	0
OTU_159	3	8	1	17	12	4	6	0	4	0	6	11	0	11	2	1	0	6	0	0	0	0	0	0	8	13	0	4	0	0	0	0	0	0	0	1	10	8	1	8	0	0	0	1	16	5	0	1	3
OTU_950	0	3	1	0	0	0	0	0	0	0	1	0	0	0	0	2	2	0	0	0	0	2	0	0	0	1	1	2	1	0	1	0	0	0	1	0	0	1	0	0	1	3	0	0	0	0	0	0	1
OTU_597	0	0	2	0	0	0	0	0	0	0	0	0	0	0	1	0	0	0	0	2	1	1	2	0	1	0	1	1	0	1	4	0	0	0	1	0	1	0	0	1	0	0	0	0	3	0	0	0	1
OTU_1651	0	0	0	0	0	1	0	0	0	0	1	0	0	0	0	0	0	0	0	0	0	0	0	0	0	0	0	0	0	0	0	0	0	0	0	0	0	1	0	0	0	0	0	0	1	0	0	0	1
OTU_486	5	6	4	2	6	3	0	3	2	4	2	0	1	0	0	3	0	2	1	0	0	0	1	2	2	8	0	1	4	0	1	1	2	4	2	2	1	2	2	3	1	1	0	3	1	4	2	2	1
OTU_592	0	0	0	0	0	0	0	0	0	0	0	0	0	0	0	0	0	0	0	0	0	0	0	0	0	0	0	0	0	0	0	0	0	0	0	0	0	0	0	0	0	0	0	0	0	0	0	0	0
OTU_338	2	3	3	3	0	1	4	4	0	1	0	0	2	2	3	4	0	2	3	1	1	3	2	2	2	3	2	3	4	0	3	1	0	0	1	3	2	3	2	0	2	2	3	5	5	2	1	5	4
OTU_641	1	1	0	1	0	2	1	1	1	2	1	0	0	0	0	0	1	1	1	0	0	0	2	0	1	4	1	0	0	1	1	1	1	1	1	1	1	1	1	1	0	0	0	3	0	0	0	0	0
OTU_1221	0	0	0	0	0	0	0	0	0	0	0	0	1	2	0	1	0	1	1	0	0	0	0	0	0	1	0	1	0	0	0	0	0	0	1	0	1	0	0	1	0	0	0	0	0	0	0	0	0
OTU_2526	0	0	0	0	0	0	0	0	0	0	0	0	1	0	0	0	0	0	0	0	0	0	0	0	0	0	0	0	0	1	0	2	0	0	0	0	0	2	0	0	0	0	0	1	0	0	0	0	1
OTU_247	3	3	4	7	2	4	0	2	2	2	2	2	3	1	2	4	1	0	2	1	0	2	1	6	6	8	2	5	2	2	3	1	0	7	0	0	1	6	2	1	3	6	0	3	3	2	5	1	1
OTU_1015	0	0	0	1	0	0	1	0	2	0	0	0	0	0	0	7	0	0	0	0	0	0	0	0	0	0	0	0	1	0	0	0	0	0	0	0	0	0	0	0	0	0	0	1	1	1	0	1	0
OTU_1279	0	0	1	0	0	0	0	0	0	0	0	1	1	1	1	3	0	0	0	0	0	1	0	0	0	0	1	0	0	0	0	0	0	0	1	0	0	0	0	0	0	0	0	0	0	0	0	0	2
OTU_717	0	0	0	0	1	0	0	0	0	0	0	0	0	1	0	1	1	0	0	0	0	0	0	0	0	0	0	0	0	0	0	0	16	0	0	1	0	0	0	0	0	0	0	0	1	0	0	0	0
OTU_420	1	14	10	1	3	3	0	0	2	0	2	5	3	3	0	4	0	2	0	2	1	4	0	1	7	7	1	3	1	0	0	0	0	0	1	1	4	4	0	4	1	0	1	1	5	4	1	3	3
OTU_248	0	0	0	21	0	1	2	0	1	1	3	0	0	0	0	0	0	0	0	0	0	0	0	1	1	1	0	1	0	0	2	0	0	1	0	0	0	3	0	1	0	1	0	3	0	0	1	0	0
OTU_574	0	1	0	2	0	5	2	1	2	1	1	0	0	1	0	1	0	1	0	0	0	1	0	1	0	0	0	1	4	4	0	0	0	0	0	0	0	0	1	0	1	0	0	1	0	0	1	0	3
OTU_492	1	1	1	1	1	0	0	0	1	0	0	0	0	0	1	0	0	0	0	0	0	0	1	2	0	1	0	2	0	1	1	3	0	0	2	1	3	0	0	1	2	0	1	0	0	1	0	0	3
OTU_805	1	1	1	1	0	4	1	1	1	1	0	0	1	1	1	1	0	0	0	0	0	0	4	0	0	1	1	0	0	0	0	0	0	0	0	1	2	0	0	1	0	0	0	0	1	0	0	0	0
OTU_2348	0	1	3	0	0	0	0	1	1	0	0	0	3	0	2	0	1	0	0	0	0	6	1	2	5	0	0	0	0	6	0	1	0	1	0	0	0	0	0	1	1	4	0	0	0	0	0	0	0
OTU_410	0	1	1	1	1	4	2	0	3	3	3	3	1	4	0	1	3	4	0	0	3	1	2	1	6	2	0	6	0	1	3	2	0	2	0	6	0	1	0	2	1	4	0	11	3	0	3	0	0
OTU_810	0	0	1	1	0	1	1	1	0	1	1	0	1	0	0	0	1	1	0	0	1	2	3	0	1	1	1	1	1	1	2	5	1	1	2	1	0	2	0	1	1	0	4	0	1	0	0	3	3
OTU_1012	3	5	2	3	1	2	0	0	1	1	0	3	0	4	1	3	0	1	1	1	0	0	0	1	3	2	0	3	0	2	0	0	1	0	0	4	0	1	0	0	0	0	0	0	3	1	0	0	0
OTU_2041	0	2	0	0	0	1	0	0	0	0	0	0	0	1	1	1	0	0	0	0	0	0	0	0	0	0	0	0	0	0	0	0	0	0	0	0	0	0	0	0	0	0	0	0	0	0	0	0	0
OTU_1367	0	2	1	0	0	0	0	3	0	0	0	0	0	1	0	3	0	0	1	0	0	0	0	0	0	0	2	0	0	0	0	1	0	0	0	0	0	0	0	0	1	0	0	0	0	1	0	0	0
OTU_1083	3	6	2	9	13	5	4	0	3	2	4	7	1	5	0	0	1	3	1	2	2	4	1	6	6	9	3	9	0	0	1	0	0	3	0	6	5	5	0	6	2	2	1	8	2	5	4	0	0
OTU_609	0	12	5	3	1	0	0	2	2	2	2	4	5	1	0	3	0	0	0	2	1	2	0	1	2	2	1	2	3	1	2	0	3	2	1	1	5	1	2	4	0	2	1	2	0	0	0	1	4
OTU_961	0	3	1	0	0	1	0	0	4	0	0	3	0	0	0	0	1	0	0	1	1	0	0	1	0	0	0	0	1	1	7	3	0	0	1	2	0	0	1	1	1	0	0	0	0	0	1	1	2
OTU_385	0	1	1	1	2	2	0	0	2	0	0	1	0	2	0	0	1	2	0	1	1	1	0	1	1	0	0	0	0	1	2	2	1	1	0	0	0	1	0	0	1	1	0	1	0	1	0	0	0
OTU_2356	0	0	0	0	0	0	0	0	0	0	0	0	0	0	0	0	0	0	0	0	0	0	0	0	0	0	0	0	0	0	0	0	0	0	0	0	0	0	0	0	0	0	0	0	0	0	0	0	0
OTU_846	0	2	0	0	0	0	1	0	0	1	0	0	0	0	0	0	0	0	1	0	0	0	0	0	0	2	0	2	0	1	0	0	0	1	0	0	0	1	0	0	0	0	0	0	0	0	0	0	0
OTU_366	3	0	0	8	0	0	0	0	2	0	1	2	0	2	2	1	0	1	0	2	0	0	0	0	1	2	0	3	0	0	0	0	0	0	0	2	3	0	1	0	2	0	2	0	0	1	0	0	0
OTU_390	0	5	0	2	0	0	1	1	0	1	0	2	0	0	0	1	1	2	1	0	0	1	1	1	39	6	0	2	3	1	0	0	0	0	0	0	3	2	2	0	3	0	0	0	2	2	0	3	0
OTU_1961	0	0	0	1	0	2	0	1	0	0	0	3	0	0	0	0	0	0	0	0	0	4	0	0	0	0	0	1	0	0	0	2	0	0	0	0	0	1	0	0	0	1	1	2	0	0	0	1	1
OTU_710	0	0	1	0	0	0	0	0	1	0	0	0	1	1	0	1	2	0	0	0	2	0	0	0	0	0	3	0	0	0	5	0	1	0	2	0	0	0	0	1	3	0	0	0	0	0	0	0	2
OTU_141	1	5	4	1	0	1	6	2	1	1	5	1	3	1	0	9	1	2	3	0	1	6	9	1	0	6	2	3	0	9	0	12	6	1	1	2	0	3	0	1	3	3	0	0	0	0	0	0	3
OTU_1895	0	0	0	0	0	0	1	2	0	0	0	0	0	0	0	0	0	0	0	0	1	0	0	0	0	1	0	0	0	0	0	0	0	0	0	0	0	0	0	0	0	0	0	0	0	1	0	0	0
OTU_240	1	7	7	3	2	2	0	0	3	2	2	10	5	3	1	2	3	2	1	4	1	2	1	4	3	2	6	2	0	3	4	1	1	4	2	5	4	2	6	4	0	2	2	2	2	1	1	3	4
OTU_836	1	0	3	0	0	0	0	1	3	0	1	1	0	0	0	1	1	1	0	0	0	0	0	1	0	2	0	0	0	0	0	1	0	0	1	0	0	1	0	0	1	1	0	0	0	0	0	2	0
OTU_408	1	3	0	2	1	1	2	0	1	4	1	1	1	1	0	1	0	0	1	1	0	1	2	2	0	2	2	3	0	1	1	1	0	1	2	1	1	0	1	4	0	0	0	1	0	2	0	2	1
OTU_195	4	1	3	1	1	2	3	1	3	2	2	4	0	4	2	1	1	1	1	1	2	2	5	3	1	6	3	2	0	1	3	1	0	6	2	0	3	2	0	2	0	1	1	2	2	0	2	1	2
OTU_231	0	13	4	1	0	0	0	7	1	0	2	1	13	4	0	2	2	0	1	2	2	3	0	1	1	0	0	0	0	0	1	0	5	0	6	1	0	0	6	0	3	0	0	0	0	1	0	5	2
OTU_448	1	11	9	6	4	8	1	3	9	2	4	2	8	4	1	9	24	2	0	3	4	5	2	1	7	9	4	11	6	4	24	6	5	3	10	0	7	5	9	5	2	1	6	1	2	5	2	10	9
OTU_190	3	3	1	7	1	2	0	0	0	0	2	3	1	2	0	1	0	3	0	2	1	0	1	2	2	2	0	1	1	2	0	3	0	3	0	3	1	2	1	0	3	5	0	5	0	0	0	0	1
OTU_2368	0	0	0	0	0	0	0	0	0	0	0	0	0	0	0	0	0	0	0	0	0	0	0	0	0	0	0	0	0	0	0	0	0	1	0	0	0	0	0	0	0	0	1	0	0	0	0	0	3
OTU_272	3	9	9	4	3	3	1	3	9	2	1	3	4	5	1	5	4	1	2	1	3	1	6	2	4	2	0	5	4	4	1	3	2	2	1	7	0	1	1	1	2	4	1	2	0	2	0	1	4
OTU_278	1	5	1	7	1	3	5	1	4	1	1	4	2	1	2	1	0	1	2	1	0	0	7	2	4	7	0	4	1	1	0	4	0	1	0	5	5	8	1	0	1	1	1	0	0	3	2	0	2
OTU_895	1	2	0	1	1	0	0	0	0	1	1	3	0	1	5	0	0	0	0	1	0	0	1	0	4	2	1	2	2	3	0	0	0	0	0	0	0	2	0	0	0	0	0	2	1	1	0	0	0
OTU_882	0	0	0	3	1	0	0	0	0	0	0	0	0	0	0	0	10	0	1	0	7	0	1	0	0	1	0	0	0	1	0	0	1	0	0	0	2	1	0	1	0	0	0	0	0	0	0	0	0
OTU_831	0	0	0	0	0	1	0	0	4	0	0	0	0	1	1	0	0	0	2	0	0	0	0	0	0	0	0	0	0	0	0	0	0	0	0	0	0	0	0	3	0	0	0	0	0	0	0	1	1
OTU_580	3	7	0	4	6	3	4	1	2	4	1	8	2	4	2	0	0	1	1	2	1	1	7	7	11	8	1	9	3	3	2	0	1	2	0	13	6	7	3	4	3	0	1	3	6	3	1	0	1
OTU_763	0	1	0	0	0	0	0	1	1	0	0	1	1	0	0	0	0	1	0	0	0	0	0	0	0	0	0	0	0	0	2	0	0	0	0	6	0	0	1	1	0	0	0	2	0	1	0	0	0
OTU_2556	0	0	0	0	1	2	2	0	0	0	1	2	0	1	0	0	0	0	0	1	0	0	0	1	1	1	0	0	0	1	0	0	0	0	0	0	0	4	0	0	0	1	1	1	1	0	1	0	0
OTU_2014	0	2	0	0	1	1	0	1	1	0	0	0	0	1	0	3	0	1	2	1	0	0	0	0	2	1	0	1	0	0	0	3	0	0	0	0	2	0	0	0	0	1	1	0	0	1	0	1	0
OTU_2465	0	0	0	0	0	0	0	0	0	0	0	0	0	0	0	0	0	0	0	0	0	0	0	0	0	1	0	0	0	0	0	0	0	0	0	0	0	0	0	0	0	0	0	1	0	0	1	0	0
OTU_655	0	5	2	0	1	0	1	0	4	0	0	0	0	0	0	1	1	0	0	1	0	0	0	0	0	0	1	1	1	1	1	0	0	0	2	0	1	0	0	1	1	3	0	0	0	0	1	0	1
OTU_1560	0	1	0	0	0	0	0	0	0	0	0	1	0	0	0	0	0	0	0	0	0	0	0	0	0	0	0	2	0	0	0	0	0	0	0	0	1	0	0	0	0	0	0	0	0	0	0	0	0
OTU_2412	0	0	1	0	0	0	0	0	0	0	0	0	1	0	0	0	0	0	0	0	0	0	0	0	0	0	0	1	0	0	1	0	0	0	0	0	0	0	0	0	0	0	0	1	0	0	0	0	0
OTU_2359	0	0	0	1	0	0	0	0	0	0	0	0	0	0	0	0	0	1	0	0	0	1	0	0	0	0	0	0	0	1	0	0	0	0	0	0	0	0	0	0	0	1	0	0	0	0	0	0	0
OTU_294	1	8	19	5	0	1	0	2	5	0	3	2	4	4	2	9	4	1	0	3	2	6	0	0	1	0	0	0	2	0	7	1	0	0	3	0	5	0	0	1	2	0	1	0	1	1	0	8	9
OTU_722	0	5	2	2	0	3	1	0	1	1	0	1	1	0	0	1	5	1	0	0	2	1	1	1	2	7	0	3	1	1	1	1	2	0	1	1	2	1	0	4	0	1	2	0	0	0	0	0	1
OTU_151	3	11	9	11	6	6	4	2	13	3	6	8	1	9	1	4	3	1	1	0	4	4	5	1	8	18	1	8	1	2	0	3	1	1	0	4	11	14	1	6	4	2	0	10	6	2	3	0	4
OTU_1852	0	0	1	0	0	0	0	0	2	0	0	1	0	0	0	0	0	0	0	0	0	0	0	0	0	0	0	0	0	0	0	0	0	0	0	0	0	0	0	0	0	0	0	0	0	0	0	0	0
OTU_438	2	5	3	3	0	4	2	1	5	2	8	2	5	2	4	4	2	3	0	3	4	2	3	5	3	7	0	4	0	2	1	4	2	2	0	2	1	3	0	1	1	0	1	1	1	1	3	7	1
OTU_835	0	0	0	1	0	0	0	0	0	0	1	1	0	1	0	0	0	1	0	0	0	1	4	0	0	0	0	0	0	0	0	0	0	0	0	0	4	0	0	2	0	0	0	1	2	0	0	0	4
OTU_2089	0	0	0	0	0	0	0	0	0	0	0	0	0	0	0	0	0	0	0	3	0	0	0	0	0	0	0	0	0	0	0	0	0	0	0	0	0	0	0	0	0	1	1	0	0	0	0	0	0
OTU_918	0	1	0	0	0	0	0	0	0	0	1	0	0	0	0	0	0	0	0	0	0	0	1	1	1	0	0	0	0	0	0	2	0	0	1	1	2	0	0	0	0	0	0	0	0	1	0	0	0
OTU_1693	0	0	0	0	0	0	0	0	0	0	0	0	0	1	0	0	1	0	0	0	0	0	0	0	0	0	0	0	0	0	0	0	0	0	0	0	0	0	2	0	0	0	0	0	0	0	0	0	0
OTU_2376	0	0	0	1	0	1	0	1	0	0	0	0	0	2	1	3	0	0	0	0	0	0	0	0	0	0	0	0	1	0	0	1	0	1	0	0	0	1	0	0	0	0	0	0	0	1	0	0	0
OTU_1200	0	0	0	0	1	0	0	0	0	0	0	0	0	0	0	0	0	0	0	0	1	0	0	1	5	0	0	0	0	0	0	0	0	1	0	0	0	0	0	0	1	0	0	0	0	0	0	0	0
OTU_553	0	0	0	0	1	0	0	0	2	2	0	0	3	1	0	0	0	1	1	0	0	1	0	0	2	0	0	0	0	0	0	1	1	0	1	1	1	2	2	0	1	0	0	0	0	0	0	6	2
OTU_914	0	0	0	0	0	1	0	0	0	0	1	0	0	0	0	0	1	0	0	0	0	0	1	0	0	1	0	0	0	0	0	1	0	0	0	0	1	0	2	0	0	1	0	1	0	0	0	0	0
OTU_701	2	1	1	1	0	4	0	0	0	1	1	5	0	1	0	1	0	1	0	0	0	1	1	1	2	1	0	1	0	0	1	0	0	0	0	0	0	6	0	0	0	1	0	0	0	0	0	1	0
OTU_1388	0	8	1	0	0	0	0	0	0	2	1	2	0	2	1	1	0	0	0	0	0	0	2	0	0	1	1	0	9	0	1	0	0	0	0	0	1	1	1	0	1	0	0	1	3	0	0	5	2
OTU_1914	0	0	0	1	0	1	2	2	0	0	0	0	2	0	2	0	0	0	0	0	0	0	0	0	0	0	0	1	2	0	0	0	1	0	0	0	0	2	1	0	1	0	0	0	1	0	1	4	0
OTU_562	2	6	3	2	0	0	0	0	0	3	0	0	8	2	1	4	2	0	1	1	2	3	0	2	0	3	1	0	0	4	1	2	4	2	2	1	4	1	0	1	1	3	0	0	1	0	1	2	5
OTU_121	5	2	3	4	0	4	2	2	4	1	5	5	3	1	1	1	0	4	2	1	0	1	3	3	5	6	3	6	1	2	1	3	1	3	1	1	3	2	1	3	1	2	0	5	4	1	1	1	2
OTU_637	2	2	1	1	1	1	0	1	0	0	0	0	0	3	0	2	1	1	1	0	1	0	0	0	0	1	5	0	0	0	1	0	0	1	1	0	1	0	3	1	1	1	1	0	1	0	0	2	1
OTU_1219	1	2	3	3	0	1	0	1	1	0	0	0	0	0	0	0	1	0	0	1	1	1	0	0	1	1	0	1	0	1	0	0	0	0	0	0	3	0	0	2	3	0	0	0	1	0	0	1	0
OTU_1088	0	0	1	0	1	0	0	0	1	0	0	0	3	0	0	0	1	0	1	2	0	0	0	0	0	1	0	0	0	0	1	1	2	0	0	1	0	0	2	2	0	0	0	0	0	0	0	0	0
OTU_631	0	4	0	2	1	1	1	3	0	1	3	3	0	0	0	1	1	1	1	0	0	1	0	0	0	4	0	1	1	1	4	1	0	1	0	2	1	0	0	1	1	1	0	4	1	1	0	5	2
OTU_100	7	33	13	6	6	4	0	6	16	0	0	2	16	22	8	27	6	0	8	10	8	10	0	0	8	1	7	10	1	2	1	1	1	0	12	4	17	4	4	11	12	2	1	0	2	5	0	6	18
OTU_1278	0	0	0	0	0	0	0	0	0	0	0	0	0	0	0	0	0	0	0	0	0	0	0	0	0	0	0	0	0	0	0	0	0	0	0	0	0	0	0	0	0	0	0	0	0	0	0	0	0
OTU_421	0	4	0	7	0	4	3	0	3	1	1	1	0	0	0	0	0	1	1	0	1	2	0	0	4	1	3	2	0	0	0	1	0	1	0	0	2	2	0	0	1	4	0	1	0	3	0	0	1
OTU_152	6	5	7	10	4	9	3	4	8	1	5	8	8	5	7	7	4	2	2	3	1	2	3	1	13	20	3	11	4	1	2	0	4	2	48	7	4	6	3	8	3	2	2	3	6	3	5	1	2
OTU_524	0	2	0	0	0	1	3	2	1	0	0	1	0	0	0	1	0	0	0	0	0	0	0	0	0	0	2	1	0	2	0	1	2	4	0	0	0	1	2	1	0	3	1	0	2	0	0	2	2
OTU_532	1	2	4	0	0	0	0	1	0	0	1	0	0	3	0	0	1	1	0	0	2	1	0	0	0	3	0	1	0	2	2	1	0	3	2	1	0	0	0	0	2	0	4	0	0	2	4	3	3
OTU_1897	0	0	0	0	0	0	0	0	0	0	0	0	0	0	0	0	1	0	0	0	0	2	0	1	0	0	0	0	0	0	0	0	1	0	0	0	0	0	0	0	0	0	0	0	0	0	0	0	0
OTU_328	3	2	0	0	1	1	1	0	0	0	0	2	0	0	0	0	0	0	2	0	1	1	0	0	0	1	1	2	1	1	2	0	0	1	0	1	1	2	7	1	0	1	0	0	2	1	0	1	1
OTU_1329	0	1	0	0	0	0	0	0	0	0	0	0	1	1	1	0	0	0	0	1	0	0	0	0	0	0	0	0	0	0	0	0	0	0	0	0	0	0	0	1	0	0	0	0	0	1	0	0	0
OTU_331	1	0	0	4	0	2	1	0	1	0	5	0	0	1	0	0	1	1	1	0	1	0	0	0	4	1	0	4	0	0	0	0	0	0	0	0	1	1	0	0	1	0	0	0	0	0	1	0	2
OTU_322	0	3	0	0	2	2	1	2	0	1	1	3	0	1	0	0	0	0	1	0	1	1	0	0	2	8	0	0	0	1	0	0	0	0	0	1	8	1	0	0	0	0	0	2	0	0	0	0	4
OTU_1117	0	7	8	2	1	0	0	8	3	0	1	0	1	2	1	5	2	0	1	2	3	3	1	2	1	4	1	0	0	1	2	1	3	0	2	0	3	0	4	3	1	1	1	1	1	0	0	1	2
OTU_395	2	3	0	4	0	3	0	1	2	0	2	5	1	0	0	5	1	2	0	1	1	0	1	2	4	1	0	2	0	0	2	0	0	0	1	0	10	2	2	1	1	0	0	1	2	0	0	0	2
OTU_506	0	0	0	0	0	1	2	0	5	0	0	0	0	0	0	1	2	0	0	1	2	0	1	1	0	1	0	1	0	0	0	0	0	0	2	5	1	1	0	0	1	1	0	1	1	1	0	1	0
OTU_1607	0	0	0	0	0	0	0	0	0	0	0	1	0	0	0	0	0	0	0	0	0	0	0	0	1	1	0	0	0	0	0	0	0	0	0	0	0	0	0	0	0	0	0	3	0	0	0	0	0
OTU_858	2	0	0	0	2	0	0	0	0	2	0	0	0	1	0	0	0	0	0	0	0	0	0	0	0	0	0	1	3	0	0	0	0	0	0	0	3	1	0	0	1	0	0	1	0	1	0	0	0
OTU_99	3	9	3	6	5	3	2	11	5	2	2	4	2	3	3	3	4	0	0	2	3	4	3	0	5	6	7	4	11	2	3	4	5	4	7	6	2	1	4	4	4	0	1	4	3	2	1	7	7
OTU_77	3	6	0	15	3	5	8	3	4	2	1	3	1	5	4	2	3	1	0	0	0	3	3	2	10	7	1	3	2	2	1	4	1	2	0	3	4	8	2	3	0	0	1	5	4	2	2	0	2
OTU_307	6	4	1	2	0	2	2	2	2	4	1	9	3	2	0	2	2	0	1	2	2	2	2	4	0	4	0	2	2	7	1	1	3	0	0	0	1	5	4	1	1	0	2	1	0	1	3	2	0
OTU_1108	0	1	0	0	1	0	0	0	0	2	1	3	0	0	0	1	1	1	1	5	0	0	1	0	1	0	2	0	1	0	0	0	0	1	0	0	0	1	0	0	0	0	0	0	1	0	0	0	0
OTU_1508	0	0	0	0	1	1	0	0	0	0	0	0	0	0	0	0	0	0	0	0	0	0	0	0	0	0	0	1	0	0	0	2	0	0	0	0	0	0	0	1	0	0	0	0	0	0	0	0	0
OTU_2361	0	0	0	0	0	0	0	0	0	0	0	0	0	0	0	0	0	0	0	0	0	0	0	0	0	0	0	0	0	0	0	0	0	0	0	0	3	0	0	0	0	0	0	0	0	0	0	0	0
OTU_1188	0	0	0	1	0	0	1	0	1	0	0	0	0	0	1	0	0	0	0	0	0	4	0	0	1	0	0	0	0	1	0	2	1	1	1	0	1	0	0	1	0	0	0	0	0	0	0	1	2
OTU_1093	0	0	1	0	0	2	1	0	0	2	0	1	0	0	0	0	0	1	1	0	0	1	2	2	3	1	0	1	1	0	0	1	0	2	0	0	0	0	0	0	1	1	0	2	0	0	0	0	1
OTU_630	0	1	3	0	0	0	0	1	0	0	1	0	1	0	0	0	0	0	0	0	0	0	1	0	0	0	0	1	1	2	0	0	5	2	0	0	0	0	0	0	0	0	1	0	0	0	0	0	0
OTU_26	2	10	5	10	15	3	7	7	5	8	19	8	9	4	1	2	10	11	5	4	8	1	0	5	9	26	4	7	24	2	1	1	2	0	2	10	12	5	5	9	4	0	2	1	17	8	7	25	1
OTU_2081	0	0	0	0	0	0	0	0	0	0	0	0	0	0	0	0	0	0	0	0	0	0	0	0	0	1	0	1	0	0	0	0	0	0	0	0	0	0	0	0	0	0	0	0	0	0	0	0	0
OTU_1898	0	0	0	0	0	0	0	0	0	0	0	0	0	0	0	0	0	0	0	0	0	0	0	0	0	0	0	0	0	0	0	0	0	0	0	0	0	0	0	0	0	4	0	0	0	0	0	0	0
OTU_496	2	0	0	0	0	0	1	1	4	0	0	0	0	0	0	1	0	0	0	0	0	1	0	1	1	2	0	5	3	1	1	1	0	0	1	0	0	2	0	0	0	0	0	2	0	1	0	0	0
OTU_617	0	1	0	0	1	1	0	1	1	2	1	1	1	1	1	2	0	0	0	2	1	2	2	0	0	0	0	3	1	1	2	0	3	0	3	0	0	2	0	1	3	1	3	1	0	0	0	0	3
OTU_901	0	1	0	0	0	0	0	0	0	0	0	2	1	0	2	1	1	0	0	0	0	0	0	0	0	0	0	0	2	0	0	0	0	0	0	1	2	0	0	2	1	0	0	0	0	0	0	1	1
OTU_968	1	0	0	1	0	2	0	2	1	0	2	1	0	0	1	1	0	0	0	0	2	0	2	0	2	2	0	0	2	3	0	0	1	4	0	2	2	1	7	0	1	2	10	4	3	1	0	2	0
OTU_336	1	4	0	3	1	1	1	0	1	0	1	1	1	2	0	4	18	0	0	0	0	2	0	0	2	6	1	2	0	0	0	0	0	0	0	0	3	0	0	4	0	1	0	1	2	1	2	0	2
OTU_563	1	2	3	7	1	1	0	0	0	0	0	0	0	3	0	8	1	0	1	5	2	0	0	10	0	0	3	1	0	0	0	0	1	0	0	0	3	0	0	0	0	1	1	0	1	0	0	1	0
OTU_529	0	4	0	3	1	1	0	0	0	0	0	1	3	0	0	3	0	0	0	1	0	1	1	2	1	1	1	8	1	0	0	1	3	0	0	2	2	0	1	0	0	0	0	1	3	1	0	1	0
OTU_671	0	0	0	1	0	1	1	0	4	1	0	0	0	0	0	1	3	0	0	0	4	0	0	0	0	1	1	3	0	1	0	0	0	3	1	0	1	1	0	1	0	1	0	0	10	1	0	0	0
OTU_1107	1	0	0	1	0	0	1	0	0	0	0	0	0	0	0	0	1	0	0	0	0	0	0	1	0	2	0	1	0	0	0	0	0	0	0	0	0	0	0	0	0	1	0	3	0	1	0	0	0
OTU_517	2	1	2	2	1	0	1	0	1	0	1	1	1	2	0	3	0	3	0	0	2	0	1	2	2	1	1	0	3	2	1	0	0	1	1	0	1	0	3	1	0	0	1	0	0	0	2	2	2
OTU_218	2	1	0	3	0	1	4	0	3	0	0	1	0	0	0	0	0	0	0	0	0	0	1	2	19	2	0	7	1	0	0	0	0	3	0	0	0	7	0	1	0	1	0	2	1	1	1	0	0
OTU_232	11	13	9	30	2	7	5	12	12	3	7	13	16	25	6	25	14	3	4	10	12	11	4	0	5	11	6	7	4	4	14	2	2	2	9	3	13	4	13	5	14	2	0	6	7	10	4	15	11
OTU_2353	0	3	1	0	0	0	0	0	2	0	0	1	1	0	0	1	1	0	0	0	1	1	0	0	0	0	0	0	1	0	1	1	0	0	0	1	1	0	0	0	1	1	0	0	1	1	0	0	0
OTU_289	2	8	5	0	2	1	1	0	1	1	2	2	0	2	0	7	3	1	1	3	0	2	1	1	3	3	4	1	2	1	0	0	0	0	3	1	7	1	1	1	5	0	3	0	2	0	0	1	3
OTU_1195	1	4	2	0	0	0	0	0	0	0	0	0	0	0	0	0	0	0	0	0	2	0	0	0	0	0	1	1	0	1	0	0	0	0	0	1	1	0	0	0	1	0	0	2	1	0	0	2	0
OTU_1416	0	4	0	2	1	1	0	2	1	0	0	1	3	0	0	0	0	1	1	2	0	1	0	0	0	1	2	1	1	0	25	0	0	1	2	0	2	0	0	0	0	0	2	0	1	1	1	1	1
OTU_318	0	4	15	0	1	2	2	1	9	0	1	0	5	3	3	8	1	0	2	3	1	13	2	0	1	1	0	1	0	3	0	2	1	1	2	0	0	2	1	0	1	1	1	0	1	0	1	1	12
OTU_1144	0	6	6	2	2	0	0	2	5	3	1	1	0	4	1	3	0	2	7	1	0	2	3	1	3	3	0	2	1	2	1	0	6	0	1	0	2	0	1	4	4	2	1	0	0	0	0	2	9
OTU_1283	0	0	1	0	0	0	0	0	0	0	0	0	0	1	0	0	1	0	0	0	0	0	0	0	0	0	0	0	0	0	0	0	0	0	8	0	0	0	0	0	0	0	0	0	0	0	0	2	0
OTU_290	1	1	0	0	0	3	2	0	0	6	2	2	0	2	0	1	1	0	0	0	0	0	4	1	2	10	1	3	0	1	0	0	1	1	1	0	0	3	1	1	2	4	0	0	1	4	0	2	0
OTU_544	1	0	1	1	0	0	1	2	0	0	0	1	2	1	1	0	0	2	0	0	0	2	2	1	0	1	0	2	0	0	0	0	0	0	1	0	1	0	4	0	5	0	1	1	0	1	1	1	0
OTU_1439	0	7	0	0	0	0	0	0	0	0	0	0	0	1	0	0	0	0	0	0	0	0	0	1	0	0	0	0	0	2	0	0	0	0	0	0	0	0	0	1	0	0	0	0	0	0	0	0	0
OTU_707	0	0	1	1	0	0	0	0	0	0	1	0	2	0	0	1	6	0	0	0	0	1	0	0	0	0	0	0	1	0	0	0	1	0	4	2	0	0	0	0	1	0	1	0	0	2	1	4	1
OTU_1412	0	0	0	2	0	0	0	0	0	0	0	1	0	1	0	0	0	0	0	0	0	0	0	1	1	0	0	0	1	0	0	0	0	0	0	1	0	1	0	1	2	1	0	0	1	0	0	0	1
OTU_2372	3	5	4	5	1	6	5	2	3	2	1	9	1	4	1	5	0	3	0	0	0	1	2	3	5	11	0	4	1	1	1	1	2	3	0	1	5	1	0	1	0	7	0	6	2	2	3	0	0
OTU_361	0	5	0	0	2	1	1	1	3	0	3	1	2	2	0	0	4	1	1	0	1	0	2	0	0	1	0	0	4	0	2	1	2	0	0	1	1	0	0	2	1	0	1	0	0	1	0	3	2
OTU_89	2	5	2	12	1	4	3	0	4	2	1	7	1	0	2	2	0	5	0	0	4	1	3	0	11	21	1	5	0	0	0	0	0	1	0	2	5	7	5	5	1	0	0	2	5	4	3	1	3
OTU_108	4	14	5	9	2	6	8	7	7	8	1	9	10	10	3	5	10	9	1	0	9	1	2	9	4	16	6	7	9	10	6	3	2	4	4	4	9	7	13	7	4	5	4	9	9	5	6	4	3
OTU_394	0	2	0	3	0	2	1	0	1	0	0	0	0	0	1	0	2	3	0	0	1	0	0	1	0	3	0	2	0	0	0	0	0	0	1	0	3	3	0	4	1	5	0	1	1	1	1	0	2
OTU_235	2	1	3	1	2	3	0	2	3	2	3	2	0	2	2	2	2	2	1	1	2	6	1	0	0	7	3	0	0	0	1	0	1	0	2	1	0	0	3	3	1	2	1	0	1	0	1	5	1
OTU_167	3	2	2	7	1	2	6	2	1	0	2	1	2	2	1	2	4	1	1	2	1	3	1	1	5	4	1	2	1	1	3	1	0	4	5	2	2	8	1	0	0	1	0	0	2	1	2	1	4
OTU_1214	0	1	1	0	0	0	0	2	0	0	0	0	0	0	0	0	0	0	0	0	0	2	1	0	1	0	0	0	1	0	0	0	0	0	0	0	0	0	0	0	1	0	0	0	0	0	0	0	0
OTU_829	0	0	1	1	0	0	0	0	2	0	0	1	1	0	0	3	0	0	0	0	2	1	0	0	0	1	1	11	0	1	0	0	0	0	1	0	0	0	0	1	1	0	0	1	0	1	0	2	0
OTU_754	2	1	0	1	5	0	1	1	3	2	7	0	2	3	0	0	1	1	0	2	1	1	0	0	0	2	4	0	0	0	1	0	1	0	0	1	3	1	0	3	1	0	0	0	1	1	1	2	0
OTU_427	1	7	7	1	0	0	0	5	0	0	0	1	0	0	2	5	0	0	0	2	0	1	1	0	0	1	1	0	0	0	0	0	0	0	0	2	3	0	0	0	0	0	8	0	0	0	0	0	1
OTU_222	3	5	2	3	3	1	1	2	1	0	0	2	1	4	1	6	1	4	1	2	1	3	1	2	0	6	0	1	2	3	4	3	3	2	2	3	1	8	0	6	4	1	2	1	1	1	3	2	4
OTU_653	0	1	0	0	0	0	0	3	0	0	1	0	3	0	0	2	0	0	0	0	1	0	0	0	0	0	2	0	1	0	0	0	1	0	3	0	0	0	0	2	0	0	2	0	0	0	0	1	4
OTU_135	2	3	3	6	3	4	1	0	4	1	2	6	1	4	1	3	0	1	0	0	0	0	1	0	5	9	0	18	1	0	0	0	1	0	3	1	4	3	0	5	1	1	0	0	3	1	1	0	1
OTU_691	0	0	0	0	0	0	0	0	2	1	0	0	0	0	1	0	0	0	0	0	0	4	0	0	0	2	1	0	0	0	0	0	1	0	1	0	0	0	1	0	1	1	0	0	0	0	0	0	1
OTU_569	1	3	0	0	2	0	3	0	0	1	0	1	0	1	0	1	1	1	0	1	1	2	0	0	4	3	0	2	0	1	0	0	1	3	0	1	1	1	0	2	1	1	1	0	1	1	1	1	0
OTU_1342	0	0	0	0	0	0	0	0	0	0	0	0	0	0	0	0	2	0	0	0	0	0	0	0	0	1	1	0	0	0	0	0	0	0	0	0	0	0	0	0	0	0	0	0	0	0	0	0	0
OTU_110	5	12	9	4	2	4	9	4	2	7	3	8	8	9	4	2	3	1	5	2	3	3	9	3	6	3	0	5	2	11	1	4	5	8	0	4	9	4	4	17	2	12	0	4	7	3	2	4	1
OTU_573	1	0	0	1	0	2	0	0	2	0	1	0	0	2	0	0	0	0	1	0	1	0	0	0	1	5	0	0	0	1	0	2	2	2	2	4	2	6	1	1	1	1	1	0	1	2	0	0	0
OTU_1131	1	0	0	0	0	0	0	0	0	0	0	2	0	0	0	0	0	0	0	0	0	0	0	2	0	1	0	2	0	0	0	0	0	0	0	3	0	0	0	0	0	0	0	0	0	0	0	0	0
OTU_566	0	2	2	1	1	1	1	0	2	0	0	4	0	1	0	1	2	0	0	1	2	0	1	1	0	3	0	2	2	2	0	0	0	3	0	0	1	1	1	0	1	3	1	2	2	0	0	2	0
OTU_736	0	1	1	0	1	0	0	0	0	0	1	0	1	0	0	1	1	0	2	2	0	0	0	0	0	1	0	0	0	0	0	0	0	0	4	0	2	0	0	0	0	0	0	2	0	0	0	1	0
OTU_936	1	1	0	2	0	0	1	0	0	0	0	0	0	1	0	0	0	0	0	0	0	0	0	0	1	2	0	0	0	0	0	2	0	0	0	0	0	2	0	0	0	0	0	0	0	0	0	0	0
OTU_1930	0	0	0	0	0	0	0	0	0	0	0	0	0	1	0	0	1	0	0	0	0	0	0	0	1	0	0	0	0	0	0	0	0	0	0	0	0	0	0	0	0	0	0	0	0	0	0	0	1
OTU_173	5	15	9	12	6	2	2	2	3	3	1	5	2	5	2	3	2	0	5	4	1	2	1	5	2	4	1	7	3	0	2	2	0	3	0	0	5	1	1	1	3	1	0	1	6	4	0	1	2
OTU_115	2	4	3	7	2	3	4	0	4	0	0	6	5	4	1	4	2	1	1	2	5	5	2	2	5	1	4	2	1	0	3	2	1	2	2	0	3	4	0	4	4	1	0	3	3	1	1	6	4
OTU_1586	0	0	1	0	1	0	0	0	0	0	0	0	0	0	0	0	0	0	0	0	0	0	0	0	0	0	0	0	2	0	0	0	1	0	0	0	0	0	0	0	1	0	0	0	0	0	0	0	0
OTU_1322	0	0	0	0	0	0	0	0	0	0	0	0	0	0	0	0	0	0	0	0	0	0	0	0	0	0	0	0	0	0	0	0	0	0	0	0	3	0	0	0	0	0	0	0	0	0	0	0	0
OTU_1888	0	0	2	0	0	0	0	1	2	2	0	1	1	0	0	0	0	0	0	0	0	0	0	0	0	0	0	0	1	0	0	1	0	0	0	0	0	0	0	0	0	0	0	0	0	0	0	0	1
OTU_73	1	6	6	8	3	6	6	1	6	1	2	3	4	9	2	1	5	11	2	0	2	4	3	4	6	12	1	3	1	6	3	3	2	2	0	5	7	13	5	7	6	2	2	8	4	2	1	1	1
OTU_1682	0	0	0	0	0	0	0	1	0	0	0	1	0	0	0	0	0	0	0	0	0	0	0	4	1	1	0	0	0	0	0	0	0	0	0	0	0	0	0	0	0	0	0	0	0	0	0	0	0
OTU_2179	0	0	0	0	0	0	2	0	0	0	0	0	0	1	1	0	0	0	0	1	0	0	0	1	0	0	0	1	0	0	1	0	0	0	0	0	0	0	0	0	0	0	0	3	0	0	1	0	0
OTU_1490	0	0	1	0	0	0	0	0	0	0	0	0	2	0	0	0	0	0	0	2	0	0	1	0	0	0	1	0	0	0	1	0	1	0	0	0	0	0	0	0	0	0	1	0	0	0	0	1	1
OTU_1186	0	1	1	0	0	1	0	0	1	0	0	1	0	1	0	1	1	0	0	1	0	5	1	1	0	0	0	0	0	0	0	0	1	0	0	1	1	2	0	2	0	0	0	0	0	0	0	0	1
OTU_2538	0	1	0	1	2	1	0	0	2	0	1	0	0	1	0	1	0	0	0	0	0	3	0	0	0	2	1	1	0	1	0	0	0	0	1	0	0	0	0	0	0	1	0	0	0	0	0	0	1
OTU_431	2	3	1	2	0	0	0	0	0	0	3	3	2	0	0	1	0	0	0	0	3	1	1	1	1	5	0	0	0	0	1	0	1	2	0	1	4	7	1	1	1	1	0	0	1	1	2	2	0
OTU_2060	0	0	0	0	0	0	1	0	0	0	3	1	0	0	0	0	0	0	0	0	0	0	0	1	0	0	1	1	0	0	0	0	0	0	0	0	0	0	0	0	0	0	0	0	0	0	0	0	0
OTU_1264	0	1	0	0	0	2	1	0	0	0	1	0	0	0	0	0	1	0	0	0	0	0	0	0	0	0	0	1	0	1	0	0	1	0	0	1	0	0	0	0	1	0	0	0	0	0	0	0	0
OTU_1431	0	1	1	0	0	0	0	1	1	0	0	1	1	1	1	1	0	0	0	4	2	1	0	0	0	0	2	0	1	1	0	0	0	0	1	1	1	0	2	0	1	0	1	0	0	0	0	11	1
OTU_507	2	5	2	5	2	5	0	0	2	1	1	6	3	4	1	0	0	3	0	0	4	5	0	0	4	7	1	6	1	0	0	1	0	0	1	1	3	3	1	4	0	0	0	5	2	2	1	0	0
OTU_118	2	8	11	0	1	2	1	5	3	0	3	1	7	5	1	11	0	2	2	5	2	10	4	1	1	3	1	0	0	1	5	1	6	0	1	4	2	0	1	2	4	0	9	1	0	2	0	9	2
OTU_1970	4	0	0	1	0	0	0	0	2	0	0	0	0	1	0	0	0	0	0	0	0	0	0	0	2	0	0	0	0	0	0	0	0	0	0	0	0	0	0	2	0	0	0	0	1	0	0	0	0
OTU_714	0	3	1	1	0	1	0	2	2	6	1	1	1	4	1	0	0	1	1	0	0	0	1	0	0	0	2	2	0	1	0	4	0	2	0	0	2	1	0	2	0	0	0	4	0	0	0	0	0
OTU_2248	0	1	0	0	0	0	1	0	0	0	0	0	0	0	0	1	0	0	0	0	0	0	0	0	1	0	0	0	0	0	0	0	0	1	0	0	0	1	0	0	1	0	0	0	0	0	0	0	0
OTU_1141	0	0	1	3	0	0	0	0	0	0	0	0	0	0	0	0	1	0	0	0	2	0	0	0	0	0	0	0	0	0	0	0	0	0	0	0	0	0	0	0	0	0	0	0	0	0	0	1	0
OTU_932	1	2	2	2	0	1	1	2	3	0	1	3	1	4	1	2	1	1	1	2	0	2	1	2	2	4	0	1	0	1	1	0	1	3	2	1	0	3	0	2	2	3	0	0	0	0	1	1	1
OTU_1850	0	1	0	0	0	0	0	0	0	0	0	0	0	0	0	2	0	0	0	0	0	0	0	0	0	0	0	0	0	0	0	0	0	0	0	0	0	0	0	0	0	0	0	0	0	0	0	0	0
OTU_2321	0	0	0	1	0	0	0	0	0	0	0	0	1	0	0	0	0	0	0	0	0	0	0	0	0	0	0	0	0	0	0	0	1	0	0	0	0	0	0	0	0	0	0	0	0	0	0	1	0
OTU_1540	0	1	1	0	0	1	0	1	0	0	1	0	0	0	0	0	0	2	0	0	0	0	0	0	0	0	0	0	0	0	0	2	0	0	0	0	0	0	0	0	0	0	0	2	0	0	0	0	0
OTU_1896	0	0	0	0	0	0	0	0	1	0	0	0	0	0	0	0	0	0	0	0	0	0	0	1	0	0	0	0	0	0	0	0	0	0	0	0	0	0	0	0	0	0	0	0	0	0	0	1	0
OTU_964	0	0	0	0	0	0	1	0	0	0	0	0	0	0	1	0	0	0	0	0	0	0	1	0	0	0	0	0	0	0	0	1	1	0	0	0	1	0	0	1	0	0	0	0	0	0	0	0	1
OTU_737	0	1	0	2	1	1	0	0	0	2	0	3	0	0	0	0	0	0	0	0	0	0	0	5	0	2	0	0	0	0	0	0	0	0	0	0	0	2	0	0	0	1	0	3	1	1	1	0	0
OTU_1856	1	0	1	1	0	6	4	0	2	1	3	0	1	2	1	0	0	1	0	0	0	1	0	1	0	0	0	1	0	0	0	1	0	1	0	0	1	0	1	1	2	3	0	1	0	2	0	0	1
OTU_1654	0	0	1	0	0	0	0	0	0	0	0	5	0	0	0	0	0	0	0	0	0	0	0	1	0	0	0	0	0	0	0	0	0	0	0	0	0	0	1	0	0	0	0	0	0	0	0	0	0
OTU_48	1	11	9	14	3	5	4	3	2	6	2	25	0	4	1	5	5	4	3	6	1	4	1	5	5	12	12	16	13	1	1	0	10	0	2	1	8	5	2	4	1	0	1	5	7	3	1	3	8
OTU_849	0	0	0	1	0	0	0	0	0	0	0	1	0	0	0	1	0	0	0	0	0	0	0	0	0	0	0	1	0	0	1	0	0	0	0	0	0	0	0	1	0	0	9	1	0	0	0	0	0
OTU_2079	0	0	0	0	0	0	1	0	1	0	1	2	0	1	0	0	0	1	0	0	0	0	0	1	1	1	0	0	0	0	0	0	0	1	0	0	0	0	0	1	0	0	0	0	1	0	0	0	0
OTU_1683	0	0	0	0	0	0	0	0	0	0	1	3	0	0	0	0	0	0	0	0	0	0	0	0	0	0	0	0	0	0	0	0	0	0	0	0	0	0	0	0	0	0	0	0	1	0	0	0	0
OTU_531	0	3	3	0	0	1	0	6	1	1	1	4	2	4	1	2	3	4	1	0	1	1	1	2	1	3	1	4	1	1	0	0	1	2	0	3	2	3	4	1	1	2	2	1	1	1	1	2	2
OTU_662	0	2	2	0	0	0	0	0	0	0	0	0	0	1	0	1	0	0	0	0	1	1	0	0	0	0	0	2	1	0	0	0	0	0	6	0	1	0	0	0	0	0	1	0	0	0	0	0	2
OTU_541	0	2	0	1	0	1	0	0	0	1	0	0	0	1	0	0	0	1	0	0	0	0	0	0	0	1	1	0	1	0	0	0	0	4	0	0	0	0	1	0	1	0	0	0	0	0	3	0	1
OTU_2309	0	1	0	0	0	1	1	0	0	0	0	0	0	0	0	0	0	1	0	0	0	0	0	0	0	1	0	0	0	0	0	0	0	0	0	0	0	0	0	0	0	0	0	0	0	0	0	0	0
OTU_582	0	5	1	0	0	0	0	2	3	0	0	2	4	2	0	1	1	0	0	2	2	1	0	0	1	2	1	0	0	0	0	1	0	0	0	2	1	0	1	2	1	0	1	0	1	0	0	0	2
OTU_564	1	3	2	0	0	0	0	2	1	0	1	0	4	0	0	1	2	0	0	0	2	4	0	0	0	0	0	0	0	0	0	0	1	0	2	1	0	0	1	1	1	0	0	0	0	0	0	4	1
OTU_230	1	9	1	11	0	1	1	1	5	0	1	1	0	1	0	1	1	1	0	0	2	1	0	0	1	2	0	5	4	0	0	1	0	3	3	0	0	0	6	1	0	0	0	1	2	0	0	0	1
OTU_612	0	3	0	2	1	0	0	1	2	0	0	1	0	0	0	0	0	0	0	1	1	0	0	0	2	0	0	4	1	0	0	0	0	0	0	1	0	0	0	1	0	0	0	0	0	0	0	2	0
OTU_216	1	6	2	3	3	5	2	0	8	1	3	1	2	2	3	9	5	1	1	1	2	1	2	4	7	8	2	2	1	5	0	2	0	0	4	3	4	2	3	3	1	1	2	3	2	3	1	1	6
OTU_53	1	23	8	5	3	1	0	7	13	0	3	8	4	6	0	7	5	0	5	4	2	4	1	0	5	3	1	4	9	2	6	0	5	0	6	8	9	1	20	9	7	0	2	0	2	0	1	7	9
OTU_497	0	4	1	0	0	0	0	0	0	0	8	0	0	1	0	0	0	0	0	0	1	1	0	2	0	1	1	0	0	6	1	0	1	3	0	0	0	0	0	0	1	0	0	0	0	1	0	1	1
OTU_2444	0	0	0	0	2	2	0	0	0	0	0	2	0	0	1	0	0	0	0	0	0	0	0	1	0	1	0	0	0	0	0	0	0	0	0	2	0	0	0	1	0	1	0	1	0	1	0	0	0
OTU_2423	1	3	1	1	0	3	0	1	2	0	1	0	0	0	3	0	2	0	0	0	2	0	1	2	0	1	0	0	0	0	1	3	0	0	0	0	0	3	0	0	0	0	0	0	0	1	1	1	1
OTU_2201	0	0	0	0	0	0	0	0	0	0	0	0	0	0	0	0	0	0	0	0	2	0	0	0	0	0	0	0	0	0	0	0	2	0	0	0	0	0	0	0	1	0	0	0	0	0	0	1	1
OTU_2507	1	4	1	0	0	0	0	1	0	0	0	1	0	0	0	0	0	4	0	0	0	0	0	0	0	0	0	0	0	0	0	0	0	1	2	1	1	0	1	0	1	0	0	0	0	0	0	0	0
OTU_1452	0	0	0	0	0	0	0	0	1	0	0	0	0	4	0	0	0	1	1	0	0	0	0	0	2	2	0	0	0	0	1	1	1	0	0	0	1	0	0	0	0	1	0	0	0	0	0	0	0
OTU_1899	0	0	0	0	0	0	0	0	0	0	0	0	0	0	0	0	0	0	0	0	4	0	0	0	0	0	0	0	0	0	0	0	0	0	0	0	0	0	0	0	0	0	0	0	0	0	0	0	0
OTU_286	2	1	1	0	0	0	0	0	1	0	0	1	1	2	2	0	4	0	0	5	0	8	0	1	0	1	8	1	0	2	5	0	2	0	2	1	0	0	0	0	3	0	1	0	1	1	0	1	3
OTU_2049	0	0	0	0	0	0	0	0	0	0	0	0	0	0	0	0	0	0	0	0	0	0	0	0	2	0	0	0	0	0	0	0	0	0	0	0	1	0	0	0	1	0	0	0	0	0	0	0	1
OTU_2189	0	0	0	0	0	0	0	0	0	0	0	0	0	0	0	1	0	0	1	0	0	1	0	0	0	0	0	0	0	0	0	0	0	0	0	0	0	0	0	0	0	0	0	0	0	0	0	0	1
OTU_1802	0	1	1	1	2	1	0	0	1	0	0	1	0	1	0	1	0	2	0	0	0	0	1	1	0	1	1	1	0	0	0	0	0	0	1	0	0	0	0	0	0	0	1	0	1	0	0	4	0
OTU_1937	0	0	0	0	0	0	0	1	0	0	0	1	0	0	1	0	0	1	0	0	0	1	0	0	0	1	0	0	0	2	1	1	0	0	1	0	0	0	0	1	1	0	0	1	0	0	0	0	0
OTU_906	1	0	0	0	0	0	0	0	0	0	0	4	0	0	0	0	0	3	0	0	0	0	0	0	0	4	0	4	0	0	0	0	1	0	0	0	0	0	0	0	1	0	0	0	0	0	0	0	0
OTU_1113	0	1	2	1	0	1	0	0	2	1	0	1	0	2	0	0	0	0	0	0	0	0	0	0	0	0	0	2	0	0	0	0	0	0	1	0	0	1	0	0	0	0	0	0	0	0	0	0	1
OTU_870	0	0	1	0	0	0	0	0	0	0	0	0	1	3	0	2	3	0	0	0	0	0	0	0	2	0	0	1	0	0	0	0	0	0	2	0	0	0	0	0	0	0	0	0	0	1	1	1	2
OTU_191	2	2	1	3	1	2	1	3	3	3	2	8	4	1	2	1	5	3	2	2	0	4	2	2	2	7	0	3	3	6	3	3	4	2	1	2	0	0	3	2	4	6	3	3	0	2	0	3	3
OTU_834	0	1	0	0	0	2	0	0	1	0	0	0	0	0	0	0	0	0	0	0	0	0	0	0	0	0	0	0	0	0	0	0	1	1	0	3	0	0	0	0	0	0	0	0	0	0	0	2	0
OTU_297	1	1	2	1	3	7	3	3	1	2	0	10	0	1	0	3	3	3	0	0	1	0	2	2	0	2	2	2	2	1	1	1	2	0	1	1	2	1	4	1	3	0	2	3	0	0	1	4	2
OTU_202	1	2	0	2	1	7	2	1	1	1	2	1	1	1	0	0	1	0	2	0	0	1	10	0	0	2	0	0	1	1	1	1	1	0	0	0	0	0	2	2	2	0	0	2	2	0	0	5	1
OTU_575	0	2	0	1	0	0	0	0	1	0	1	1	0	1	1	0	2	0	0	0	2	0	0	0	0	1	0	0	0	0	0	1	1	0	0	0	1	1	0	0	0	0	0	0	0	0	0	0	0
OTU_675	0	0	0	0	0	2	0	1	2	0	0	1	0	0	1	1	2	0	0	1	3	0	2	0	0	2	1	1	0	0	0	0	1	1	0	1	0	0	0	0	1	0	0	0	1	0	0	1	0
OTU_876	0	0	1	0	3	1	0	0	1	0	0	2	0	1	0	0	0	1	0	0	0	0	0	0	0	0	3	1	0	0	1	0	1	0	0	0	0	1	0	0	0	0	0	2	0	1	0	0	1
OTU_1066	1	5	2	1	0	0	0	0	3	0	0	1	3	2	0	0	1	0	1	0	1	5	2	2	1	3	1	2	2	0	2	0	0	1	1	2	2	2	1	0	1	0	0	0	0	1	0	0	1
OTU_740	0	0	1	0	0	0	0	1	0	0	1	1	0	0	0	3	0	0	0	0	0	0	0	0	0	0	0	0	0	0	0	1	0	0	0	0	0	1	1	0	0	0	1	0	0	0	0	0	1
OTU_513	0	1	2	5	1	0	0	0	3	0	1	1	1	1	0	1	1	0	1	0	0	2	0	0	0	3	0	2	1	0	0	0	0	0	0	0	0	1	0	3	1	0	0	0	1	1	1	0	1
OTU_433	4	4	1	3	0	3	1	1	6	1	2	1	1	2	1	1	0	1	0	7	0	0	1	1	2	2	2	0	2	1	2	0	0	3	3	0	4	2	2	1	0	0	0	3	0	1	1	0	6
OTU_1238	1	0	2	0	0	0	0	0	1	1	0	1	0	3	1	1	0	0	1	3	1	0	0	2	1	2	1	1	0	0	1	2	3	0	1	0	3	1	0	0	0	1	0	0	0	1	0	1	0
OTU_650	0	3	7	0	1	0	0	0	0	0	0	0	6	0	0	5	0	0	0	3	0	5	1	0	0	0	2	0	0	0	0	0	1	0	1	0	0	0	0	0	1	0	0	0	0	0	0	3	8
OTU_330	1	1	3	0	0	0	1	2	0	0	0	0	2	0	0	2	2	1	1	2	0	1	1	3	0	1	1	1	1	1	2	6	1	1	3	0	1	2	0	5	0	1	0	0	0	1	3	1	1
OTU_2263	0	0	1	0	1	1	0	0	1	0	0	0	0	0	0	2	0	1	0	0	1	0	1	0	0	0	0	2	1	1	0	1	0	0	0	1	2	0	0	0	0	0	0	0	0	0	0	0	0
OTU_360	4	1	6	3	1	3	1	2	5	1	1	1	1	4	2	8	4	4	1	1	1	3	0	8	4	2	1	6	3	0	1	0	1	1	5	0	6	1	0	2	1	2	4	0	1	1	1	0	6
OTU_401	4	6	0	3	0	3	5	4	5	4	3	1	7	5	1	4	9	1	1	3	7	4	1	1	1	3	7	2	2	4	8	3	4	0	4	5	0	4	2	3	7	2	3	1	9	9	1	9	7
OTU_568	2	0	0	0	0	0	1	0	1	0	1	1	0	0	0	0	0	0	0	0	0	0	0	0	0	0	3	2	0	0	0	0	0	0	0	0	0	0	0	0	0	0	0	0	1	0	0	0	0
OTU_1375	6	5	5	1	1	4	1	4	4	3	2	1	3	15	2	4	4	4	2	1	3	4	3	7	2	2	0	9	1	5	1	2	1	9	2	3	1	2	1	10	4	3	1	2	2	2	2	2	3
OTU_259	2	16	2	6	5	1	1	4	0	8	2	16	1	0	0	0	1	2	0	1	0	0	1	1	1	49	0	0	5	0	0	0	1	0	1	4	4	2	5	0	1	0	0	3	6	2	4	1	0
OTU_345	1	0	1	0	1	1	0	0	3	2	0	0	0	1	0	2	0	3	0	1	2	1	1	1	1	2	0	0	1	2	0	0	0	0	0	2	0	3	3	2	0	0	0	1	2	1	1	2	0
OTU_1942	1	0	0	1	4	0	0	0	0	0	0	2	0	0	0	0	0	0	0	0	0	1	0	0	1	0	0	0	0	0	0	0	0	0	0	0	1	0	1	0	0	0	0	0	0	0	1	0	0
OTU_370	0	1	1	1	0	0	0	0	0	0	0	1	1	2	0	5	3	0	0	3	0	0	0	0	3	3	3	0	2	0	1	1	2	1	0	1	1	1	5	0	1	1	0	0	0	2	0	2	0
OTU_934	0	4	4	1	0	1	1	1	0	0	2	1	0	2	0	0	0	1	1	0	0	0	0	0	0	2	0	1	2	0	0	0	2	2	1	0	0	1	0	0	1	0	1	3	1	0	0	1	1
OTU_850	1	2	1	2	0	3	0	0	3	0	0	1	0	0	0	0	2	0	0	0	0	0	0	0	0	5	0	3	0	0	0	0	0	0	0	1	0	0	0	0	0	0	0	0	0	1	0	0	0
OTU_998	2	2	0	0	0	1	1	6	0	0	1	2	0	0	0	1	2	1	0	0	0	1	0	2	0	2	0	0	0	0	1	0	0	0	1	0	0	1	1	0	2	0	0	1	0	0	1	0	0
OTU_927	0	1	0	1	1	1	1	0	1	1	2	4	2	1	0	0	2	1	0	1	1	0	1	1	2	2	0	1	2	0	1	0	1	0	0	1	0	0	0	1	1	0	2	0	0	2	2	1	0
OTU_670	0	2	0	2	0	5	6	0	1	4	0	2	0	1	0	0	0	0	0	0	0	0	6	2	2	4	0	1	1	2	0	3	0	1	0	6	1	4	0	1	1	6	0	2	1	1	2	1	0
OTU_693	0	5	0	1	0	0	0	1	0	2	0	0	0	1	0	0	0	0	0	0	0	1	0	0	1	2	1	4	0	1	0	0	1	0	0	0	0	0	0	0	4	0	0	0	1	0	0	0	2
OTU_903	0	0	1	0	1	0	0	0	0	0	0	1	1	1	0	1	0	0	0	0	0	0	0	0	0	1	0	0	0	0	0	0	0	0	0	0	0	0	0	8	0	0	0	0	0	0	0	1	1
OTU_2441	2	0	0	1	0	0	0	0	0	0	1	0	1	0	0	0	0	0	0	0	0	0	1	0	1	2	0	0	2	1	1	1	1	1	0	0	0	0	0	1	0	0	0	0	1	2	0	0	0
OTU_627	1	0	0	3	2	2	0	4	3	1	1	7	4	3	0	5	1	3	0	5	0	2	4	2	5	3	1	0	2	0	0	0	1	4	2	3	5	1	5	4	1	0	1	11	8	1	0	2	0
OTU_1245	2	9	1	0	0	1	0	3	0	1	2	1	0	0	0	3	3	0	1	0	0	0	4	0	1	5	0	0	1	3	0	0	0	0	0	0	2	1	0	0	3	0	1	2	0	2	0	1	0
OTU_1987	0	0	0	0	0	1	0	0	0	0	0	0	1	0	0	0	0	0	0	0	0	0	0	0	0	0	0	0	1	0	1	0	0	1	0	0	1	0	1	0	1	0	0	0	1	0	0	0	0
OTU_2281	0	0	0	0	0	0	0	0	0	0	0	3	0	0	0	0	0	0	0	0	0	0	0	0	0	0	0	0	0	0	0	0	0	0	0	0	0	0	0	0	0	0	0	0	0	0	0	0	0
OTU_1863	0	0	0	0	0	0	0	0	0	0	0	0	1	0	0	0	0	0	0	0	0	0	0	1	1	0	0	0	0	0	1	0	0	0	1	0	0	0	0	0	0	0	0	0	0	0	0	0	0
OTU_828	3	1	1	2	3	4	0	0	0	0	0	2	1	0	2	0	0	1	0	0	0	0	0	1	2	5	0	3	0	0	0	0	0	1	0	1	1	0	0	1	0	0	0	2	3	1	1	0	0
OTU_285	0	4	2	3	0	1	0	0	3	1	1	4	2	1	2	2	1	2	4	0	1	2	7	3	4	5	0	4	3	2	1	9	1	6	0	3	7	3	0	2	2	4	1	5	8	1	4	0	0
OTU_459	0	4	0	0	0	0	3	0	1	1	1	4	0	1	0	2	0	0	1	1	0	1	4	2	1	4	0	2	0	5	0	1	0	2	0	1	2	0	0	1	6	5	0	0	0	1	1	0	2
OTU_489	2	3	0	4	0	0	0	3	2	0	0	0	4	3	1	4	1	0	0	0	1	0	0	0	1	0	3	1	1	0	0	0	0	0	3	2	3	0	0	1	0	0	3	1	1	3	0	3	0
OTU_1632	1	0	0	0	0	2	0	0	0	0	0	2	0	0	0	0	1	0	0	0	0	0	1	1	0	0	0	0	0	0	0	0	0	0	0	0	0	0	0	0	0	0	0	0	0	0	1	0	0
OTU_2454	0	0	0	0	0	0	0	0	1	0	0	0	0	0	0	0	0	0	0	0	0	0	0	0	0	1	0	0	0	0	0	0	0	0	0	0	0	0	0	0	0	0	0	0	0	0	0	0	0
OTU_144	1	3	1	11	3	6	2	0	7	2	5	4	3	3	2	0	4	4	1	0	0	0	2	2	4	6	1	13	0	0	1	0	1	4	1	0	5	3	1	2	0	1	0	0	2	3	2	4	1
OTU_1261	0	0	0	0	0	2	0	1	1	0	0	0	0	0	0	0	1	0	0	0	0	1	2	1	0	7	0	0	1	1	2	0	0	0	0	2	0	0	0	0	0	0	0	1	0	1	0	1	0
OTU_1602	0	3	1	1	0	1	0	0	0	0	1	0	0	0	0	0	0	0	0	0	0	0	0	2	0	0	0	0	2	0	0	0	0	0	0	1	0	0	0	0	0	3	0	1	0	0	1	0	0
OTU_176	2	7	5	8	2	1	0	5	6	0	1	4	11	2	3	4	2	0	8	1	2	5	1	3	0	0	1	1	1	1	0	1	2	4	1	2	8	1	0	1	1	2	3	1	3	3	0	2	7
OTU_214	2	4	3	10	2	13	4	0	5	0	6	6	1	10	3	1	8	1	5	2	2	3	1	1	5	6	3	2	1	2	2	3	0	3	0	2	4	3	4	6	2	1	0	0	0	0	2	1	3
OTU_1119	0	0	0	0	0	0	0	0	0	0	0	6	0	0	0	0	0	0	0	0	0	0	0	1	1	0	0	0	0	0	0	0	0	0	0	0	0	1	0	0	0	0	0	0	0	0	1	0	1
OTU_476	0	0	1	0	0	2	5	1	0	0	0	3	1	0	1	4	0	0	0	0	0	0	0	1	0	7	0	0	0	1	0	1	0	0	1	0	1	3	1	0	2	0	0	3	2	1	0	1	0
OTU_926	0	0	0	1	0	1	0	0	1	1	1	0	0	0	0	0	0	0	0	0	0	0	1	1	0	0	0	1	0	0	0	0	0	0	0	1	0	0	0	1	0	0	0	2	0	0	0	0	1
OTU_1333	0	1	0	0	0	0	0	1	0	0	0	0	1	1	0	1	0	0	0	0	0	0	0	0	0	1	0	0	0	0	0	0	0	0	0	0	0	0	0	0	1	0	0	0	0	0	0	0	0
OTU_832	0	0	1	0	1	0	0	6	0	0	1	0	0	0	0	2	0	0	0	0	0	1	0	0	0	0	0	0	0	0	0	0	0	0	0	1	0	0	0	0	2	0	0	0	0	0	0	0	1
OTU_1135	1	0	1	1	0	0	0	0	0	0	0	0	0	0	1	2	0	0	1	0	2	0	0	0	0	0	0	0	0	1	1	0	0	0	0	0	2	0	1	1	0	0	0	0	0	0	0	0	2
OTU_539	5	4	0	6	1	6	6	0	2	2	3	2	0	1	2	1	0	0	0	2	7	0	3	0	5	2	0	1	0	0	0	1	0	0	4	1	1	3	0	4	0	0	1	1	0	5	1	1	3
OTU_2331	1	4	0	1	0	1	0	0	4	0	0	2	0	0	0	0	3	0	1	2	2	1	0	1	0	0	0	0	4	1	0	0	0	1	0	4	1	0	1	0	1	0	0	6	2	1	0	0	0
OTU_1027	0	0	0	0	0	0	0	0	0	0	0	2	1	1	0	3	3	0	1	1	0	0	0	0	0	0	1	0	1	1	0	0	0	0	1	0	0	2	0	1	0	0	0	0	0	1	0	0	0
OTU_1296	1	0	0	1	0	1	1	0	1	0	0	1	0	0	0	0	1	0	0	0	1	1	1	2	0	0	0	1	0	1	0	3	0	0	0	0	1	0	0	0	0	1	0	0	0	0	1	0	0
OTU_840	0	0	0	0	0	0	0	1	2	0	0	0	1	0	0	2	1	0	0	1	2	0	0	0	0	0	0	0	0	0	0	0	0	0	1	0	0	0	3	0	1	0	0	0	0	0	0	0	2
OTU_579	3	1	1	3	3	2	0	0	1	0	0	1	0	1	0	0	0	0	1	0	0	0	0	0	1	3	0	1	1	0	0	0	0	0	1	0	0	1	0	1	0	0	0	0	0	0	0	0	1
OTU_209	0	0	3	2	2	3	0	2	1	0	0	1	0	1	1	0	2	2	1	0	0	1	1	2	6	5	0	4	1	4	0	1	0	1	1	0	0	1	1	1	2	1	2	1	2	0	1	2	0
OTU_1664	0	2	0	0	0	0	1	1	0	0	0	0	1	1	0	1	1	0	0	0	0	0	1	0	0	1	0	1	0	2	0	0	0	0	0	0	0	0	0	0	1	0	0	0	1	0	0	0	2
OTU_1900	0	0	0	0	0	0	0	0	0	0	0	0	0	0	0	0	0	0	0	0	0	0	0	0	0	0	0	0	0	0	0	0	0	0	0	0	1	0	0	0	0	0	0	0	0	0	0	0	0
OTU_1295	0	0	0	0	1	0	0	0	0	0	0	0	1	0	0	0	1	0	1	0	0	0	0	0	0	1	1	0	0	0	0	0	0	0	0	0	1	0	1	0	0	0	0	0	1	1	0	1	0
OTU_2219	0	5	1	1	3	0	0	0	4	0	1	2	3	1	0	5	1	1	0	1	5	6	0	0	1	1	1	0	3	0	0	1	2	0	4	3	2	1	2	3	1	0	1	0	2	0	0	4	5
OTU_452	1	1	1	2	3	0	1	1	0	1	1	1	0	1	3	0	1	0	1	0	1	2	0	2	2	0	0	2	0	1	1	0	0	1	0	3	0	1	0	1	0	4	0	2	0	0	0	0	0
OTU_2436	0	0	0	0	0	0	0	0	0	0	0	0	0	0	0	0	0	0	0	0	0	0	0	0	0	1	1	0	0	0	0	0	0	0	0	2	0	1	0	0	0	0	0	0	1	0	0	0	1
OTU_555	0	2	1	0	1	2	0	0	1	3	1	0	1	1	0	0	1	1	0	1	0	2	0	7	1	3	0	1	0	1	0	5	2	2	2	0	0	4	0	1	0	3	0	0	0	1	1	1	2
OTU_1406	0	0	1	0	0	1	0	0	0	0	0	0	0	1	0	0	3	0	0	0	0	1	1	0	0	8	0	0	1	0	0	0	0	1	0	0	0	0	0	0	0	0	0	0	0	0	0	0	3
OTU_1617	1	13	4	0	3	0	0	2	4	0	1	0	5	6	1	1	5	0	3	7	2	3	2	0	2	0	4	3	3	2	4	0	1	0	2	3	1	2	3	8	1	1	1	0	1	1	1	14	6
OTU_1243	2	0	1	1	0	0	0	0	0	0	0	0	0	0	0	1	1	0	0	0	0	0	0	0	1	1	0	2	0	1	0	0	0	0	0	0	1	1	0	0	1	0	1	2	2	0	0	0	0
OTU_404	0	1	3	0	2	0	0	3	3	0	0	0	2	1	5	2	0	0	3	5	3	3	5	0	0	0	0	0	2	0	1	0	0	0	5	0	0	0	0	1	0	0	1	0	0	0	0	0	4
OTU_703	0	3	1	0	0	0	0	1	0	0	0	0	0	3	7	0	2	1	1	0	0	1	0	0	0	0	0	0	0	0	1	0	0	1	1	0	0	0	0	1	2	0	0	0	0	0	0	1	0
OTU_1208	0	0	0	0	0	1	0	0	0	0	0	2	0	0	1	0	0	1	0	0	0	0	0	0	0	0	0	0	0	0	0	0	0	0	0	1	0	0	0	0	1	1	0	0	1	0	0	0	0
OTU_2557	3	0	6	0	0	3	0	2	0	0	0	0	0	0	0	1	0	0	0	0	0	0	0	0	0	1	0	0	0	0	0	0	0	0	0	0	1	0	0	1	0	0	1	0	0	2	0	0	1
OTU_380	1	4	3	0	1	5	10	0	1	0	3	1	1	0	0	3	2	0	2	2	0	0	1	1	2	2	1	4	0	1	0	1	1	2	1	5	3	3	0	4	1	0	2	0	4	5	2	2	0
OTU_884	0	0	2	1	3	2	0	1	3	0	0	0	0	0	0	1	0	0	0	0	0	2	1	0	0	0	1	0	0	1	0	0	0	0	0	0	0	1	2	0	0	0	0	1	0	0	0	1	0
OTU_565	1	5	0	1	0	1	0	0	0	1	0	0	0	1	1	0	1	1	0	1	0	1	1	0	1	0	0	5	0	1	0	0	0	0	0	1	3	0	0	0	0	0	2	0	0	0	0	3	0
OTU_310	1	8	3	4	2	8	0	3	4	0	1	12	1	1	2	2	2	1	1	1	0	1	0	1	2	13	0	3	1	0	1	0	0	0	1	2	3	2	1	1	3	0	1	9	2	2	0	0	0
OTU_762	0	1	2	1	0	0	0	0	4	0	1	1	0	1	0	2	1	0	3	0	1	1	2	1	3	1	2	1	0	1	1	0	0	0	0	0	2	2	0	1	0	1	0	0	0	1	1	0	1
OTU_1048	0	0	0	0	0	0	1	0	0	0	0	0	0	0	0	0	0	0	0	0	0	0	0	0	0	1	0	0	0	0	0	0	0	0	2	0	0	0	0	0	1	1	0	7	0	0	0	0	0
OTU_371	2	9	3	6	2	14	2	6	4	3	7	5	1	2	3	1	1	3	4	4	0	2	8	12	5	10	5	1	2	1	3	4	4	6	0	2	6	2	2	5	1	8	2	7	4	1	1	3	2
OTU_1722	0	3	0	0	0	1	0	0	0	0	0	0	0	0	1	1	0	0	0	0	0	0	0	0	0	0	1	0	0	0	0	0	0	0	0	0	1	0	0	0	0	0	1	0	0	0	0	0	1
OTU_1209	0	3	0	0	1	1	2	0	2	0	1	1	0	0	0	0	1	1	0	1	2	0	1	0	0	0	1	0	0	3	0	0	0	1	0	0	2	1	0	1	0	0	0	0	2	1	0	0	0
OTU_2057	0	1	0	0	0	0	0	0	0	1	0	0	0	0	0	0	0	0	0	1	0	0	4	1	0	0	0	0	0	0	0	3	0	0	0	0	1	2	0	1	1	1	0	0	0	0	0	0	2
OTU_1236	0	2	0	1	1	0	1	2	2	0	0	5	2	1	0	0	0	1	1	1	0	0	0	3	0	1	1	0	0	1	0	1	0	0	1	2	0	1	1	0	1	1	1	0	0	1	0	0	1
OTU_393	0	9	9	4	0	1	0	2	6	0	0	1	0	4	2	1	1	2	6	1	2	2	0	0	2	1	1	0	0	4	0	0	0	0	1	0	5	2	5	8	2	0	0	1	0	0	0	1	1
OTU_314	2	6	3	3	1	2	1	1	9	3	1	0	0	7	3	10	2	1	2	0	3	2	2	0	4	6	1	6	1	2	0	1	1	0	2	1	2	3	2	6	1	2	1	0	0	1	0	0	3
OTU_624	1	2	1	1	0	1	0	0	0	0	0	1	0	5	1	1	0	0	0	0	0	0	3	1	5	0	0	0	0	1	0	0	0	0	0	0	1	1	0	0	0	1	0	0	0	0	0	2	2
OTU_183	3	7	6	0	3	3	1	9	3	5	2	4	2	4	1	3	4	7	5	2	0	1	2	3	0	2	2	3	2	1	0	0	6	1	7	1	2	1	1	4	4	5	1	2	1	2	1	3	2
OTU_519	1	3	1	3	0	2	2	0	1	0	0	4	4	5	0	1	2	1	0	1	2	0	2	3	0	2	0	0	3	2	2	0	3	0	0	2	0	0	1	1	2	0	0	2	3	1	2	0	1
OTU_265	3	6	1	15	1	8	5	0	10	1	1	10	2	3	0	0	2	2	0	0	2	1	0	1	5	4	1	5	0	3	1	0	1	0	3	0	4	8	4	1	0	1	0	6	12	4	1	1	4
OTU_466	1	5	1	2	1	3	1	1	1	2	0	3	1	6	2	2	0	0	3	1	1	1	1	2	2	0	0	2	1	1	1	0	0	0	1	2	5	3	0	4	5	0	0	2	3	1	1	0	4
OTU_220	0	0	0	4	2	3	0	0	1	1	4	0	2	4	0	0	3	3	0	0	0	2	0	2	7	8	0	4	1	3	0	0	0	8	3	3	0	3	0	2	2	3	2	5	3	2	0	2	1
OTU_2483	0	1	0	1	0	0	0	0	0	0	0	1	0	0	0	0	0	0	0	0	0	0	0	0	0	0	0	0	0	0	0	1	0	0	1	0	0	0	1	0	0	0	0	1	0	0	0	0	0
OTU_2505	0	2	1	1	0	2	0	0	0	1	0	1	0	0	0	0	0	0	0	0	0	0	0	0	2	0	0	1	0	0	1	0	0	0	0	0	0	0	0	1	0	0	0	1	0	0	0	0	4
OTU_213	1	2	3	8	1	0	0	1	3	1	2	3	0	1	1	0	1	0	0	0	1	0	1	1	2	4	1	2	2	0	0	0	1	0	1	3	3	0	6	1	0	0	0	2	2	1	1	1	2
OTU_1139	4	3	2	1	0	1	1	0	0	0	3	2	9	1	0	0	1	2	1	0	3	1	1	4	2	7	1	7	2	0	1	2	2	1	1	2	1	2	0	0	1	2	1	1	1	0	1	1	0
OTU_1892	0	0	1	0	0	0	0	0	0	0	0	0	0	0	0	0	1	0	0	0	1	0	0	0	0	0	3	0	0	0	0	0	0	0	0	0	0	0	0	0	0	0	1	0	0	0	0	0	0
OTU_925	2	1	0	0	0	0	0	0	1	0	0	1	0	0	0	0	0	0	0	0	0	0	0	0	1	0	0	0	0	0	0	4	0	0	0	0	0	1	1	0	0	0	0	8	0	0	0	0	0
OTU_823	1	0	1	0	1	0	0	1	1	0	1	0	0	1	0	0	0	1	1	0	1	0	2	0	0	0	0	2	0	0	0	0	0	0	0	1	1	0	0	0	0	0	0	0	0	0	0	0	0
OTU_988	0	0	0	0	0	0	0	2	2	1	0	0	0	0	0	0	0	0	0	0	0	0	0	0	0	0	0	0	0	1	1	1	0	0	0	0	0	0	0	0	0	0	0	0	0	0	0	0	0
OTU_656	2	0	0	0	3	0	0	0	0	0	2	1	0	0	0	0	0	1	0	0	0	0	0	6	2	2	0	1	0	0	0	0	0	0	0	0	0	1	0	0	0	1	0	2	0	0	1	0	0
OTU_179	2	13	10	4	1	2	4	2	6	4	5	1	5	7	1	5	6	0	1	1	3	4	0	12	6	6	4	1	9	0	5	2	4	4	2	4	3	1	2	7	3	0	1	2	3	3	1	6	4
OTU_2332	1	1	0	0	0	0	0	0	0	0	0	0	0	0	0	0	0	0	1	0	0	1	0	0	0	0	0	0	0	0	0	0	0	0	0	0	0	0	0	0	0	0	0	0	0	1	0	0	0
OTU_1587	0	1	0	0	0	0	1	0	0	0	0	0	1	0	0	0	0	1	0	0	0	0	0	0	1	0	0	0	0	0	0	0	0	0	0	0	1	3	2	0	1	0	0	0	0	1	1	0	0
OTU_2491	0	1	0	0	0	0	0	0	0	0	0	0	0	0	0	0	0	0	0	0	0	0	0	0	0	0	0	0	0	0	0	0	1	0	0	0	0	0	0	0	0	0	0	0	0	0	0	0	0
OTU_578	5	0	0	0	0	2	0	0	0	1	1	0	1	0	0	2	0	0	0	0	0	0	0	2	1	3	0	0	0	0	0	0	0	0	0	0	0	2	0	0	0	0	0	0	0	1	0	0	0
OTU_416	1	4	1	0	3	2	2	0	1	1	1	0	0	0	1	2	1	0	0	1	2	1	0	0	1	0	0	2	3	0	0	0	0	0	0	0	1	2	0	0	1	0	1	0	1	0	1	0	0
OTU_1813	0	1	0	0	0	0	0	0	1	0	1	0	0	0	0	0	1	0	0	0	0	0	0	0	1	2	0	1	0	0	0	1	0	0	0	0	0	0	0	0	0	0	0	0	1	2	0	0	0
OTU_470	0	8	3	1	0	0	0	1	1	0	3	0	0	1	2	3	3	0	1	0	0	7	0	2	0	11	1	3	0	0	1	2	0	0	2	0	0	0	0	1	1	0	0	1	0	0	0	2	7
OTU_999	0	1	2	1	0	0	0	1	1	0	0	3	2	0	1	1	0	0	0	0	0	1	0	0	2	0	0	0	1	1	1	0	1	0	2	0	0	0	1	2	3	0	0	0	0	0	0	0	0
OTU_317	2	1	4	5	5	4	7	0	2	1	3	3	1	4	2	4	2	2	0	3	2	0	6	1	3	5	2	9	1	3	2	2	0	8	1	3	6	7	1	4	0	2	2	3	3	2	2	1	2
OTU_1202	0	0	0	0	0	0	0	0	0	0	0	1	0	0	0	0	0	0	0	0	0	0	0	0	3	0	0	0	0	0	0	1	0	0	1	0	1	0	1	0	0	0	0	0	0	0	1	0	0
OTU_1104	0	2	2	1	0	1	1	1	1	0	0	1	1	1	0	1	0	1	0	0	0	0	0	0	1	2	0	0	1	1	1	1	1	0	0	2	4	2	0	0	1	0	0	1	0	0	1	0	1
OTU_429	1	3	16	10	0	2	0	0	0	12	0	2	0	1	0	4	0	0	4	0	0	3	1	2	0	0	0	1	0	0	0	0	0	0	0	0	0	0	0	0	0	0	0	0	0	0	1	0	1
OTU_1430	0	5	0	0	0	0	0	0	0	1	0	1	1	1	0	0	1	0	0	0	1	0	0	0	0	0	0	0	0	0	0	0	2	0	0	0	0	0	0	1	0	0	0	0	0	0	0	0	1
OTU_2197	0	1	0	0	0	0	0	0	0	0	0	0	0	1	0	0	0	0	0	0	0	1	0	2	0	1	1	0	0	0	1	1	0	0	0	0	1	0	0	0	0	0	0	0	0	0	0	0	0
OTU_505	0	0	1	2	0	0	0	0	7	0	1	2	1	2	1	1	0	0	0	0	0	0	0	2	1	0	0	0	2	0	0	0	0	0	0	1	1	2	0	2	0	0	1	1	2	0	0	0	0
OTU_534	2	5	2	1	1	1	0	0	2	1	1	0	0	2	2	0	1	2	0	1	1	0	0	3	4	10	0	3	1	1	0	0	1	0	0	0	3	2	0	3	1	0	0	0	0	4	0	3	1
OTU_207	4	6	2	4	3	1	0	0	3	1	3	1	1	2	1	2	2	0	1	0	1	2	0	1	0	3	6	4	0	0	1	6	1	0	0	1	3	0	2	1	1	0	0	1	4	0	4	1	2
OTU_424	0	10	4	3	2	2	0	5	0	1	1	4	0	2	1	2	0	1	0	1	1	4	6	2	3	2	1	4	1	2	3	4	0	1	3	0	0	3	0	1	6	1	0	1	0	2	14	0	8
OTU_674	0	0	0	0	0	0	0	2	2	0	0	0	0	0	1	4	0	1	0	1	0	1	1	0	0	1	0	0	1	0	0	0	0	0	0	2	3	1	1	1	0	0	0	0	1	1	0	0	0
OTU_1723	0	1	0	0	0	0	0	0	0	0	0	1	0	0	0	0	0	0	0	0	1	0	0	0	0	0	1	0	0	0	0	0	1	0	0	0	0	0	0	0	0	0	0	1	0	0	0	0	0
OTU_1953	1	1	1	1	1	1	1	0	0	1	0	1	0	0	0	0	0	4	0	0	1	0	0	0	0	0	0	0	1	0	0	2	0	1	1	2	1	1	0	1	0	0	0	1	1	0	3	0	4
OTU_463	6	2	3	10	4	1	1	0	2	2	2	1	4	2	0	1	1	4	1	0	0	0	1	1	5	5	2	1	1	1	0	0	0	1	0	0	1	1	0	2	5	3	2	0	1	2	2	0	2
OTU_1270	0	0	0	0	0	0	0	0	2	0	0	0	0	0	0	1	1	0	0	0	0	0	0	0	0	0	0	1	0	0	0	1	1	0	1	0	0	0	1	0	0	0	0	1	0	1	0	0	1
OTU_2085	0	0	0	0	0	0	1	0	0	0	1	0	0	0	0	0	0	0	0	0	0	0	0	0	0	6	0	0	0	0	0	0	0	0	0	0	0	0	1	2	0	0	0	0	0	0	0	0	0
OTU_2540	0	0	0	1	0	1	0	0	0	0	0	0	0	0	0	0	0	2	0	0	0	0	0	0	0	1	0	0	0	0	3	0	0	1	0	0	0	0	0	0	0	1	0	0	0	1	0	0	0
OTU_442	1	4	2	0	2	2	0	0	1	3	0	0	1	2	0	1	1	0	0	1	0	1	0	0	1	4	1	0	0	0	0	1	0	1	0	0	0	0	0	1	0	1	0	1	1	2	0	0	2
OTU_889	0	4	0	0	1	0	0	0	0	0	1	0	1	1	0	0	0	0	0	0	0	0	0	2	0	1	0	0	0	1	0	0	0	0	0	0	0	0	0	0	0	0	0	0	1	0	0	0	0
OTU_378	0	2	2	5	0	1	2	2	3	0	1	0	1	2	0	2	1	1	2	1	0	0	4	1	0	3	0	2	2	0	0	0	0	3	3	1	0	1	2	2	1	0	0	2	1	1	0	0	0
OTU_1267	3	3	0	1	0	1	0	3	5	1	0	2	1	2	5	0	1	2	0	0	2	1	1	0	1	5	1	1	2	4	1	2	0	2	0	0	2	2	1	0	1	0	2	1	2	0	0	0	2
OTU_267	0	3	1	1	1	1	0	1	2	1	0	1	0	1	2	0	2	0	1	0	0	3	1	0	1	0	1	1	2	1	1	3	1	7	1	2	2	1	3	1	0	3	0	3	3	2	1	0	2
OTU_1056	0	0	0	2	0	2	0	2	1	0	0	3	3	5	0	0	2	1	0	0	2	0	1	0	0	2	0	0	0	2	1	2	2	2	1	3	0	0	2	1	0	0	0	1	0	1	0	0	2
OTU_933	0	1	0	1	0	0	2	0	1	0	0	0	0	0	0	0	0	1	0	0	0	0	0	0	0	0	0	1	1	0	0	0	0	0	0	0	0	0	0	0	0	0	0	1	0	0	1	0	0
OTU_1352	0	1	0	0	0	0	0	0	0	1	0	0	1	0	0	0	0	0	0	0	0	0	0	0	0	0	0	0	0	0	0	1	0	0	0	0	1	0	0	0	0	0	0	0	0	0	0	0	0
OTU_888	1	0	2	0	0	3	0	1	1	1	0	1	2	3	0	1	1	0	0	1	1	0	0	0	0	1	0	2	1	0	2	2	2	0	1	1	1	2	0	1	0	0	0	0	1	0	0	0	11
OTU_611	1	1	1	0	0	0	0	0	0	1	0	1	0	0	1	0	0	0	0	0	1	1	1	0	1	2	0	1	0	0	0	0	0	1	1	1	0	0	0	3	1	1	0	0	0	0	0	2	1
OTU_695	0	0	1	0	0	0	0	0	0	0	0	0	0	0	0	0	1	0	0	0	0	0	2	0	0	2	0	0	0	1	2	1	0	0	0	0	0	0	0	0	0	0	0	0	0	0	0	0	0
OTU_613	0	2	3	1	0	0	0	1	0	0	0	0	0	0	0	2	1	0	0	0	0	1	0	0	0	1	0	0	2	1	1	0	0	0	0	1	2	0	2	4	0	0	0	0	0	1	0	0	0
OTU_1045	0	2	0	0	6	0	0	1	2	0	1	0	0	0	1	4	0	0	1	0	0	0	0	1	0	1	2	0	0	1	0	1	0	1	0	0	1	0	0	1	0	2	0	0	0	0	0	0	2
OTU_413	0	1	0	0	0	0	0	0	0	0	0	0	1	1	0	0	1	0	0	2	1	31	0	0	0	0	1	0	0	1	0	0	3	1	1	0	0	0	0	0	1	0	1	0	1	0	0	1	1
OTU_586	0	1	4	5	0	0	0	2	1	0	1	0	1	1	0	1	1	0	0	1	0	1	0	0	2	0	2	1	0	0	0	0	0	1	0	0	0	0	0	0	1	0	0	0	1	0	0	1	0
OTU_659	0	0	2	1	0	0	0	0	1	0	0	0	0	4	2	3	1	0	0	0	1	1	0	0	0	0	0	3	1	0	0	1	0	0	0	0	2	0	0	3	0	0	1	0	1	0	0	0	0
OTU_1450	0	0	0	0	1	1	0	1	1	1	0	0	0	0	0	1	1	0	0	1	1	0	0	0	0	0	1	0	0	0	0	0	0	0	1	0	1	0	0	0	1	0	0	0	0	0	1	1	1
OTU_1142	0	1	3	4	0	5	0	3	0	0	0	1	0	2	1	2	0	0	0	0	0	0	0	0	5	0	1	1	0	1	0	1	0	0	0	0	2	1	0	0	1	0	0	0	0	0	0	0	0
OTU_2471	0	0	0	0	0	0	0	1	0	0	0	0	0	0	0	0	0	0	0	0	5	0	0	0	0	0	0	0	0	0	0	0	0	0	0	0	0	0	0	0	0	0	0	0	0	0	0	0	0
OTU_1301	0	2	0	0	1	0	0	0	1	0	0	1	0	0	0	0	0	0	0	0	0	0	0	0	0	2	0	1	2	0	0	0	0	1	0	0	1	0	0	0	0	1	0	1	0	0	0	0	1
OTU_802	1	3	4	1	0	2	0	1	0	6	1	1	1	0	0	0	2	2	0	1	1	1	0	1	2	1	0	3	0	0	0	2	2	0	1	2	0	4	0	0	0	0	0	2	1	0	0	2	2
OTU_1351	0	0	1	1	1	0	0	0	1	0	0	1	0	0	0	0	0	0	0	0	1	1	0	0	0	1	0	1	0	0	0	0	1	0	0	0	1	0	0	0	0	0	0	2	0	1	0	0	0
OTU_577	2	2	3	0	2	2	0	1	1	2	0	0	0	5	1	0	1	1	0	0	0	2	0	1	1	3	0	1	0	0	0	1	1	2	0	1	0	2	0	1	2	1	0	6	2	0	1	0	1
OTU_548	0	2	0	3	3	2	0	0	1	0	0	0	0	0	0	0	0	1	0	0	0	0	0	0	2	0	0	1	0	1	0	0	1	0	0	1	0	1	0	1	0	0	0	0	1	1	0	0	0
OTU_1146	0	2	1	0	0	0	0	1	1	0	0	0	2	0	0	1	0	0	0	1	1	1	1	0	0	0	0	0	1	0	1	0	0	0	2	1	0	0	0	0	0	0	0	0	0	0	0	2	1
OTU_1030	0	3	1	1	0	0	0	2	0	0	0	1	0	1	0	1	0	0	0	1	0	0	0	0	0	0	0	0	2	0	0	0	0	0	0	0	0	0	0	0	0	0	1	0	0	0	0	1	2
OTU_1423	0	0	0	0	0	0	1	0	1	0	0	0	0	1	1	0	0	0	0	0	1	0	0	0	1	1	0	0	0	0	0	0	0	0	0	0	1	1	1	1	1	0	0	2	0	0	0	0	0
OTU_792	0	2	0	0	0	0	0	0	0	0	0	0	1	1	0	1	1	0	0	0	0	0	0	1	0	3	0	0	0	0	2	0	0	1	0	0	0	0	0	0	0	0	0	0	0	0	0	1	0
OTU_324	0	5	0	0	2	1	0	1	1	2	0	0	4	1	0	0	1	1	0	2	7	2	2	1	0	1	2	1	0	3	3	0	2	2	0	1	0	0	1	1	1	0	1	0	0	1	0	2	1
OTU_786	0	1	5	0	0	6	2	0	2	0	0	0	1	5	2	2	0	0	1	1	0	1	4	0	0	2	1	0	0	1	0	1	1	0	0	1	0	1	0	1	0	1	1	0	0	0	0	0	1
OTU_1109	0	0	0	0	0	0	0	0	0	1	0	1	0	0	0	0	0	0	0	0	0	0	2	0	1	3	0	0	0	0	0	0	0	0	0	0	0	1	0	0	0	0	0	0	0	0	0	0	0
OTU_1112	5	6	3	5	0	0	1	0	0	3	1	2	2	2	0	0	0	0	2	0	0	1	0	0	3	3	5	2	0	1	1	0	0	0	2	1	5	3	0	0	2	0	0	3	3	1	0	2	1
OTU_871	1	1	2	0	0	1	3	1	1	0	0	2	1	1	0	2	1	1	0	0	4	2	0	0	0	1	0	2	0	1	1	0	1	4	1	2	0	1	0	2	0	0	0	2	0	0	1	1	0
OTU_1618	0	0	0	0	0	0	0	5	0	0	0	0	0	0	0	0	0	0	0	0	0	0	0	0	0	0	0	0	0	0	0	0	0	0	0	0	0	0	0	0	0	0	0	0	0	0	0	0	0
OTU_852	0	2	4	0	0	0	0	0	0	0	0	0	0	2	0	0	0	0	1	0	0	5	0	0	0	0	0	0	0	0	0	0	1	0	0	0	0	0	0	0	0	0	0	0	0	0	0	0	3
OTU_1003	1	0	0	0	0	0	0	0	0	0	0	0	0	0	0	2	2	0	0	0	2	0	0	0	0	0	0	0	0	0	0	1	0	0	1	0	0	0	0	1	0	0	0	0	0	0	0	0	1
OTU_1349	0	1	0	1	0	0	1	0	0	1	0	1	0	0	0	0	1	0	1	0	0	2	0	0	0	3	0	1	0	0	1	0	0	0	0	0	0	0	1	1	0	0	0	0	0	0	1	0	1
OTU_590	1	5	2	6	2	1	0	0	1	1	2	1	3	1	1	0	0	1	1	1	1	1	2	0	1	0	1	0	1	0	3	1	1	0	2	4	1	2	1	2	3	0	3	0	3	2	0	0	1
OTU_628	2	3	0	0	2	0	0	0	0	0	3	0	2	0	1	0	2	1	1	2	4	0	0	0	0	4	2	0	1	1	1	1	1	0	3	0	0	2	1	1	2	0	1	2	0	1	0	1	0
OTU_373	2	4	2	1	2	2	2	1	3	2	5	2	0	1	5	0	0	5	0	1	0	0	2	1	4	3	1	7	2	0	0	1	0	0	0	1	2	1	1	3	1	3	0	8	1	0	1	0	0
OTU_760	0	2	1	2	0	0	0	0	0	1	0	0	0	0	0	1	0	3	0	0	3	1	1	1	2	2	1	0	0	0	1	0	0	0	0	1	1	0	1	0	0	0	1	0	0	0	0	0	0
OTU_546	1	3	1	1	2	0	3	0	2	0	0	1	0	0	0	1	0	0	0	1	0	0	0	2	2	6	0	2	0	0	2	0	0	1	1	1	1	4	1	2	0	1	0	0	1	2	0	0	0
OTU_1611	0	1	0	1	0	0	0	0	0	0	0	0	0	1	0	0	0	0	0	0	0	0	1	0	2	1	0	1	0	0	0	0	0	0	0	0	0	1	0	0	1	0	0	1	0	1	1	0	0
OTU_1478	0	1	0	0	0	0	0	0	0	6	0	0	0	1	0	0	0	0	0	0	0	0	2	0	0	5	0	0	0	0	1	0	1	0	0	0	0	1	0	0	0	0	0	0	0	0	0	0	0
OTU_1068	0	0	1	0	0	1	0	0	1	0	0	0	0	0	0	0	0	0	2	1	0	1	1	2	0	0	0	1	0	1	0	0	0	0	2	1	0	1	0	0	0	0	0	2	0	0	0	0	0
OTU_1590	0	1	0	0	0	0	0	0	1	0	1	0	0	1	3	0	1	0	0	0	2	0	0	0	0	1	0	0	0	0	1	0	0	1	0	1	0	0	0	6	0	1	0	0	0	0	0	0	1
OTU_928	0	1	0	0	0	0	0	0	0	0	0	0	0	0	0	1	0	0	0	0	0	0	0	0	2	0	0	0	0	0	0	0	0	1	0	0	0	0	0	0	0	0	0	0	0	1	0	0	4
OTU_2431	0	0	0	1	0	0	0	0	0	0	0	0	0	0	0	0	0	0	0	0	0	0	0	1	0	0	0	0	0	0	0	0	0	0	0	0	0	0	0	0	0	0	0	0	0	0	0	0	0
OTU_376	0	2	2	1	0	1	0	0	1	2	1	2	3	1	1	1	6	1	2	3	0	3	2	0	0	0	3	0	1	2	1	0	2	0	1	4	0	1	0	4	0	1	5	0	0	0	0	2	4
OTU_1969	0	1	0	0	0	0	0	0	0	0	0	0	0	0	0	0	0	0	0	0	0	0	0	0	0	0	0	0	0	0	0	0	0	0	0	0	0	0	0	0	0	0	0	0	0	0	0	0	0
OTU_554	3	5	2	0	1	1	0	5	1	1	0	2	2	2	0	1	1	0	0	0	0	3	0	0	1	4	1	1	3	1	1	0	2	0	0	4	3	0	1	1	2	2	1	0	3	1	0	2	1
OTU_600	0	0	3	0	0	0	0	1	0	0	1	0	2	0	0	3	2	0	0	0	0	1	0	0	0	0	0	0	0	0	0	0	0	0	0	0	0	0	3	1	3	0	0	0	0	0	0	0	4
OTU_1323	3	2	4	0	1	2	0	2	7	1	2	0	2	3	1	7	1	0	0	0	11	2	1	9	11	5	2	5	3	1	1	3	1	0	0	4	8	2	2	1	5	0	0	16	2	4	4	0	3
OTU_825	0	4	0	1	0	0	0	2	0	2	0	1	0	0	0	0	0	0	0	2	1	0	0	0	0	2	1	0	0	0	0	0	0	1	0	0	2	3	1	0	1	1	0	1	0	0	0	0	0
OTU_2220	1	1	0	1	0	0	0	0	0	0	0	0	0	1	2	0	0	0	0	0	0	0	0	0	0	0	1	0	0	4	0	0	0	0	0	0	0	0	0	2	0	0	0	1	0	0	1	0	0
OTU_1180	0	0	0	0	0	1	1	0	0	0	0	0	0	0	0	0	0	0	0	0	0	0	0	1	0	1	0	2	0	0	0	0	0	0	0	0	0	2	0	0	0	0	0	1	2	1	1	0	0
OTU_696	0	4	6	2	1	0	1	1	1	0	0	1	0	0	0	2	0	0	1	2	1	0	0	1	1	6	0	0	0	0	0	1	1	0	0	3	0	3	0	0	0	0	0	1	1	0	0	0	0
OTU_1114	0	3	0	0	0	0	0	0	0	4	0	1	0	0	0	1	0	0	0	2	0	1	2	0	0	2	0	0	0	0	0	1	0	2	0	1	0	0	0	2	0	0	0	1	1	0	0	1	1
OTU_2319	0	0	0	0	0	0	0	1	0	0	0	1	0	0	0	0	0	0	0	1	0	0	0	0	0	0	0	0	0	0	0	0	1	0	2	0	0	0	0	0	0	0	0	0	0	0	0	0	0
OTU_969	0	0	0	0	0	0	1	3	0	0	0	0	0	0	0	0	0	0	0	0	0	0	0	0	0	1	0	0	0	0	0	1	1	2	1	1	0	1	0	0	1	0	0	1	0	0	0	0	0
OTU_2434	0	0	0	0	0	0	0	0	0	0	0	0	0	0	0	0	0	0	0	0	0	0	0	0	0	0	0	0	0	0	0	1	0	0	0	0	0	0	0	0	0	0	0	0	0	0	0	0	0
OTU_1411	0	0	0	0	0	0	0	0	0	0	2	0	0	0	1	0	0	0	0	0	0	0	0	0	0	0	0	0	0	0	0	2	0	0	0	0	0	0	0	0	0	0	0	0	0	0	1	0	0
OTU_905	0	1	0	0	3	3	1	0	0	0	0	1	0	0	0	0	0	1	0	0	0	0	1	0	1	3	0	2	0	0	0	0	0	0	0	0	0	1	0	1	0	0	0	1	0	0	0	0	0
OTU_1297	0	1	1	2	0	0	0	2	0	0	0	0	1	1	0	0	0	0	0	0	0	1	0	0	0	0	0	0	0	0	3	0	0	0	1	0	0	0	0	0	0	0	0	0	1	0	0	0	0
OTU_2384	0	0	0	0	0	0	0	0	0	0	0	0	0	0	0	0	0	0	0	0	0	0	0	0	0	1	0	0	0	0	0	2	0	0	0	0	0	0	0	1	0	0	0	0	0	0	3	0	0
OTU_589	1	6	1	3	4	1	4	0	2	0	0	4	0	0	0	0	3	2	1	0	4	1	0	1	2	5	3	2	1	0	0	0	1	0	0	3	0	4	4	0	2	0	0	1	0	1	0	0	1
OTU_1616	1	0	0	0	0	0	1	0	0	0	0	0	0	0	0	0	1	0	0	1	1	0	0	0	0	0	0	1	0	0	0	0	0	1	0	0	0	0	1	0	0	2	0	0	0	0	0	0	0
OTU_1988	0	1	0	1	0	0	0	0	2	0	0	0	0	0	0	0	0	0	0	0	0	1	0	2	0	1	0	0	0	0	0	0	0	1	2	0	0	0	0	0	0	0	0	0	0	0	1	0	0
OTU_354	1	7	2	2	0	1	0	2	2	0	0	2	2	3	0	0	5	0	0	1	1	2	2	0	6	6	0	3	3	0	1	1	0	0	0	4	1	1	0	2	2	0	0	0	3	1	0	0	3
OTU_430	0	4	5	3	4	3	3	4	0	2	0	0	0	1	1	2	1	1	0	2	1	0	0	3	0	3	2	3	1	0	0	4	0	1	0	3	0	2	1	1	0	6	1	1	0	1	2	0	0
OTU_699	1	2	2	0	0	0	2	2	2	0	1	1	4	5	1	3	5	1	0	0	0	1	0	1	1	3	0	2	0	1	0	1	1	1	0	1	1	4	2	4	0	0	0	0	1	1	0	0	2
OTU_1250	0	0	0	0	0	0	0	1	0	1	0	0	0	3	0	0	0	0	0	0	0	0	0	0	0	0	0	0	0	0	0	0	1	0	0	1	0	1	0	5	0	0	0	0	0	0	0	0	0
OTU_234	0	0	6	0	1	4	1	0	4	0	0	0	1	0	1	4	0	0	8	0	0	0	0	0	1	5	2	0	1	2	0	0	0	2	0	3	1	0	2	0	0	14	0	2	1	0	0	1	4
OTU_690	0	0	0	2	0	2	0	0	2	1	0	1	0	2	0	0	0	0	0	0	1	0	1	1	2	3	1	2	0	0	1	0	0	0	1	0	1	0	0	0	3	0	0	0	0	0	1	5	1
OTU_2439	0	0	0	0	0	0	0	1	0	0	0	0	0	0	0	0	0	0	0	0	0	1	0	0	0	0	0	1	0	0	0	0	0	0	0	0	1	1	0	0	0	0	0	0	0	0	0	1	1
OTU_1929	1	1	0	3	0	0	0	0	0	1	0	0	0	1	0	0	0	0	0	0	1	0	0	0	1	2	0	0	0	0	0	0	0	0	0	1	0	1	0	2	1	1	1	2	0	0	0	0	0
OTU_919	0	1	2	0	0	0	2	2	1	0	0	0	0	0	0	0	0	1	0	0	0	0	0	0	7	0	1	0	1	1	0	1	0	0	0	0	0	1	0	0	0	0	0	0	0	10	0	0	1
OTU_1346	0	0	0	0	0	0	0	0	0	0	0	0	0	0	0	0	0	0	0	0	0	0	0	0	0	1	0	0	0	0	0	0	0	0	0	0	1	0	0	0	0	0	0	0	0	0	0	0	0
OTU_816	0	1	0	0	0	0	0	3	2	0	0	0	0	2	1	0	0	0	0	0	1	0	0	0	0	0	3	0	0	1	1	0	2	0	0	0	0	0	0	0	0	0	1	0	0	1	0	0	0
OTU_1466	0	0	0	0	0	0	5	0	0	0	0	0	0	0	0	0	0	0	0	0	0	0	0	0	0	0	0	0	0	0	0	0	1	0	0	0	0	0	1	0	0	0	0	0	0	0	0	0	1
OTU_869	0	1	0	3	0	2	0	0	3	0	0	0	0	1	0	3	0	0	0	0	1	0	0	0	0	1	1	1	1	0	0	0	0	0	2	0	0	0	0	1	0	0	0	0	1	0	0	0	2
OTU_518	0	3	0	3	0	3	3	0	0	1	3	1	0	0	0	0	0	1	0	1	0	0	0	0	0	0	1	4	1	0	0	0	0	0	0	0	0	1	1	0	0	0	0	0	1	0	2	0	1
OTU_585	1	1	7	2	1	2	2	1	0	0	3	1	2	2	1	3	3	0	4	2	3	5	2	1	1	0	1	4	1	2	0	0	3	2	0	2	2	7	0	4	1	6	6	0	2	0	0	2	2
OTU_2272	0	1	0	0	0	0	0	0	0	1	0	0	0	1	0	0	0	0	0	0	1	0	1	0	0	0	1	1	0	0	0	0	0	0	0	2	0	0	0	0	0	0	0	2	1	0	0	1	0
OTU_1041	0	3	2	0	1	1	1	1	0	0	1	0	4	0	2	3	4	1	1	2	1	0	0	0	0	0	0	0	0	0	3	0	0	0	4	3	0	4	0	0	0	0	1	0	0	1	0	1	0
OTU_467	1	6	1	4	0	0	1	4	1	4	1	0	3	1	2	0	1	3	0	1	8	2	9	0	1	1	0	3	1	7	2	5	6	0	0	3	5	2	1	4	2	0	1	0	11	1	1	1	4
OTU_972	0	1	0	0	1	0	0	0	1	0	2	0	1	2	1	0	1	0	0	0	0	2	0	0	0	0	0	0	0	0	1	0	0	0	0	0	0	0	0	0	1	0	0	0	0	0	0	2	0
OTU_625	0	0	9	0	0	0	0	0	0	0	0	0	0	1	0	0	0	1	1	0	0	0	0	0	2	1	0	0	0	3	0	0	1	0	0	1	1	0	1	2	0	1	0	1	0	0	1	0	1
OTU_1368	0	1	1	0	0	0	2	0	1	2	0	0	0	0	0	2	1	0	1	0	0	0	0	0	1	0	0	1	1	0	0	0	0	1	0	0	0	1	1	0	1	3	0	0	0	0	0	0	1
OTU_1928	0	0	0	0	0	0	0	0	0	0	0	0	0	0	0	0	1	0	0	0	0	0	0	0	0	0	0	0	0	0	0	0	0	0	0	0	0	0	0	0	0	0	0	0	0	0	0	0	0
OTU_685	0	7	5	0	1	1	2	5	4	1	0	0	6	2	1	8	2	0	0	7	5	8	2	1	1	0	1	1	2	1	6	2	4	0	1	1	0	0	1	3	6	0	5	0	0	0	0	4	10
OTU_824	0	0	1	2	0	2	0	0	0	0	0	3	1	0	0	0	1	0	0	0	0	0	0	0	0	3	0	0	1	0	0	0	0	1	1	0	0	0	1	3	0	1	0	1	0	0	1	2	0
OTU_320	0	2	5	3	0	2	1	1	14	0	0	2	3	2	1	5	1	0	2	0	0	4	3	1	2	6	1	2	0	2	0	1	2	2	0	1	1	2	1	2	0	0	4	0	0	0	0	1	10
OTU_1865	0	0	0	0	0	0	0	0	0	0	0	0	0	0	0	0	0	0	0	1	0	0	0	0	0	0	0	0	0	0	0	0	0	0	0	0	0	0	0	0	0	0	0	0	0	0	0	0	0
OTU_184	4	2	2	4	1	3	1	0	1	0	1	3	0	2	1	0	1	2	0	0	0	0	2	0	8	8	2	4	1	1	0	2	0	1	0	0	3	11	0	3	0	1	0	3	1	1	3	0	1
OTU_1485	0	0	0	0	0	0	0	0	0	0	0	0	0	0	0	0	0	0	0	0	0	0	0	0	1	1	0	0	0	0	0	1	0	0	0	0	0	1	0	0	0	0	0	1	0	1	0	0	0
OTU_606	13	1	0	0	0	1	0	1	0	1	0	1	0	1	1	2	0	0	0	0	0	2	0	1	1	1	1	1	0	0	0	0	1	1	2	0	0	0	0	0	0	1	0	2	0	0	1	0	0
OTU_296	3	18	11	8	4	2	0	11	5	2	1	2	6	10	0	9	6	1	1	2	3	24	0	0	4	3	1	4	3	2	2	1	6	3	4	0	7	2	3	6	3	0	2	4	1	1	0	1	10
OTU_2514	0	0	0	0	0	0	0	0	0	0	0	0	0	0	0	0	1	0	0	0	0	0	0	0	0	1	0	2	0	0	0	0	0	0	0	0	0	0	0	0	0	0	0	0	0	0	0	0	0
OTU_280	2	9	1	5	1	0	0	0	0	1	1	1	0	0	0	1	2	4	0	1	3	3	1	0	2	14	1	2	2	2	0	0	3	1	6	2	3	3	1	0	7	0	3	1	0	2	0	1	1
OTU_1272	0	3	0	1	1	0	0	0	0	1	0	1	0	0	0	0	0	1	0	0	3	0	0	1	0	2	0	0	0	1	0	1	1	0	0	1	1	1	2	1	1	0	1	1	0	2	0	0	0
OTU_1343	0	0	0	0	0	1	1	0	0	0	0	0	0	0	0	2	1	0	0	0	0	1	0	0	0	1	0	0	0	0	0	0	0	0	0	0	0	0	0	0	0	0	0	0	0	0	0	0	0
OTU_1501	0	0	0	0	0	0	0	0	0	0	0	1	0	0	0	0	0	1	0	0	1	0	1	0	0	0	0	0	0	0	0	0	0	0	0	0	0	0	0	1	0	0	0	0	0	1	0	0	0
OTU_1866	0	0	0	0	0	0	0	0	0	0	0	0	0	1	0	0	0	0	0	0	0	0	0	0	0	0	0	0	0	0	0	0	0	0	0	0	0	0	0	0	0	0	0	0	0	0	5	0	0
OTU_1877	0	2	1	0	2	4	0	1	1	1	0	0	0	1	0	0	2	1	1	0	1	0	1	0	0	2	0	0	0	2	2	0	2	0	1	0	0	1	0	0	1	0	0	5	3	0	0	0	0
OTU_787	0	2	1	2	2	0	0	1	2	0	0	1	0	2	2	2	9	0	2	0	0	0	1	0	2	0	1	0	0	0	1	0	0	0	3	0	1	0	0	1	5	1	0	0	0	0	0	2	1
OTU_910	0	1	0	0	0	0	4	0	0	0	1	3	1	0	0	0	0	0	0	0	0	1	4	1	0	3	1	2	0	2	0	2	0	1	0	0	0	1	0	0	0	1	0	0	0	0	0	1	2
OTU_2520	0	1	2	0	0	0	0	0	0	0	0	0	0	0	0	1	0	0	0	0	0	0	0	0	0	0	0	0	0	0	0	0	0	0	0	0	2	1	0	0	0	0	1	0	0	1	0	0	0
OTU_2323	1	0	0	0	0	0	0	0	0	0	0	0	0	0	0	0	0	0	0	0	0	0	0	0	1	0	0	0	0	0	0	0	0	0	0	0	0	0	0	0	0	0	0	0	1	0	0	0	0
OTU_367	0	0	0	6	1	1	0	1	2	1	0	1	2	2	2	0	2	1	2	0	1	2	4	0	0	1	0	4	1	0	0	0	0	0	0	1	2	0	1	0	0	0	0	0	1	2	1	0	1
OTU_645	2	0	1	1	1	3	1	0	3	1	0	2	0	1	0	0	0	0	0	0	0	1	1	0	1	0	1	4	0	0	0	0	0	0	0	0	1	0	0	3	0	0	0	1	2	0	0	0	0
OTU_1414	0	4	0	0	0	0	0	1	1	0	0	0	0	0	0	0	0	3	0	0	0	0	0	0	0	0	0	0	1	0	0	0	0	2	0	0	0	0	1	0	0	3	0	0	1	1	0	1	0
OTU_996	0	0	0	0	0	0	0	0	0	0	1	0	0	0	0	0	0	1	0	0	0	4	0	0	3	1	0	0	0	0	0	0	0	1	0	0	0	0	0	1	1	1	0	1	0	0	0	0	0
OTU_2343	0	0	0	0	0	0	0	2	0	0	0	3	0	0	0	0	0	0	0	0	0	1	0	0	0	1	0	0	0	0	0	0	0	0	0	0	0	1	1	0	0	0	0	0	0	0	0	0	0
OTU_769	0	2	1	0	0	0	0	0	1	0	0	1	0	2	0	2	0	1	1	0	0	0	0	0	0	0	0	0	0	1	1	0	0	0	0	0	0	0	0	0	0	1	0	0	1	0	0	0	3
OTU_1175	0	0	0	0	0	0	0	0	0	2	0	0	1	0	0	0	0	0	0	0	1	0	0	0	0	0	0	0	0	0	0	0	0	0	0	0	0	0	0	0	0	1	0	0	0	0	0	0	1
OTU_1201	0	0	0	0	0	0	0	0	0	0	1	0	0	0	0	0	0	1	0	0	0	0	0	0	0	0	0	7	0	0	0	0	0	0	0	0	0	0	0	0	0	0	0	0	0	0	0	0	0
OTU_422	3	0	1	0	0	6	2	0	4	0	0	1	1	0	0	0	0	0	0	0	0	0	2	0	2	0	0	1	1	1	0	0	0	0	0	0	0	3	0	2	0	1	0	0	0	1	0	0	2
OTU_667	0	0	3	0	0	1	0	0	0	0	1	0	1	0	0	1	0	0	1	1	0	3	0	1	0	1	2	0	1	0	5	0	1	0	1	0	0	0	0	0	0	0	1	0	1	1	0	1	2
OTU_679	2	2	1	1	1	0	0	1	3	1	0	3	0	3	0	0	0	0	0	0	0	0	2	3	1	4	0	0	0	0	1	1	2	1	0	4	1	1	1	2	1	1	0	2	0	0	1	0	1
OTU_681	0	2	2	1	0	4	0	0	3	4	0	0	0	3	2	1	0	0	0	1	1	0	0	0	1	7	0	0	1	0	0	0	0	0	0	0	5	2	3	2	0	0	0	0	0	0	0	0	1
OTU_359	1	1	0	0	0	1	2	0	0	1	0	1	0	0	1	0	0	3	0	0	0	0	0	0	3	0	1	6	0	1	0	0	0	1	0	1	0	2	0	0	1	0	0	1	0	0	0	0	0
OTU_640	0	7	1	0	0	0	0	0	0	0	0	1	0	0	0	3	0	0	0	0	1	0	0	0	1	0	0	0	0	0	0	0	1	0	0	1	1	0	0	0	1	0	0	0	0	3	0	0	0
OTU_490	0	1	0	2	0	0	3	0	0	0	1	1	1	1	0	0	0	0	0	1	0	1	0	0	2	8	0	1	1	0	0	0	1	0	0	0	1	0	0	0	1	0	0	1	1	1	1	2	1
OTU_242	0	7	4	2	0	2	0	2	1	1	5	0	5	1	1	7	5	0	0	3	5	5	1	0	9	5	0	1	0	0	1	1	3	1	0	1	3	0	4	2	1	0	1	0	1	0	0	2	2
OTU_516	0	0	3	1	0	0	3	1	0	0	0	0	9	0	0	1	0	0	0	2	1	2	0	0	0	0	0	0	0	0	5	0	0	0	2	0	0	0	0	1	1	0	2	0	0	1	0	1	2
OTU_1376	0	0	0	0	0	0	0	0	0	0	0	6	0	0	0	0	0	0	0	0	0	0	0	0	0	0	0	0	0	0	0	0	0	0	0	0	0	0	0	0	0	0	0	0	0	0	0	0	0
OTU_313	0	3	5	1	0	0	1	0	0	0	0	3	2	2	3	0	3	0	2	3	1	0	0	0	0	0	1	0	0	0	2	2	0	0	1	0	0	0	0	1	1	2	2	1	1	0	0	3	6
OTU_1147	0	0	1	2	0	1	0	0	0	0	0	0	0	0	0	0	0	0	0	0	0	0	0	0	2	0	0	1	0	0	0	0	0	0	0	0	0	2	0	1	0	0	0	2	1	0	0	0	0
OTU_2036	0	2	0	0	0	0	0	0	0	0	0	0	0	0	0	0	0	0	0	0	0	0	1	0	0	0	0	0	0	0	0	0	0	0	0	0	0	0	0	0	0	0	0	0	0	0	0	1	1
OTU_639	1	0	2	3	3	1	1	0	5	2	0	1	2	0	0	1	1	0	0	2	1	0	1	0	3	0	0	2	0	0	1	1	0	3	0	1	1	2	0	4	0	4	0	0	1	4	0	1	2
OTU_976	0	0	0	0	0	0	0	0	0	1	0	0	0	0	0	0	0	0	0	0	1	4	1	0	0	0	0	0	0	0	0	1	0	0	0	0	0	1	0	1	1	2	0	0	0	0	0	1	0
OTU_316	4	5	3	8	4	3	4	3	5	1	8	4	4	5	4	5	8	6	1	1	1	2	1	0	4	4	4	2	3	1	3	1	2	3	4	4	4	1	3	4	3	6	3	2	3	4	4	4	6
OTU_352	3	0	0	1	2	3	5	0	2	0	1	5	3	2	1	1	1	2	1	0	1	0	0	3	2	2	0	1	0	0	0	0	0	1	1	3	3	5	1	2	1	1	0	0	0	1	2	1	0
OTU_418	0	3	1	1	0	1	0	1	1	0	0	0	1	2	0	0	1	0	0	0	0	0	0	1	0	0	0	0	1	0	1	1	0	0	0	2	1	1	1	0	0	0	0	1	0	0	2	0	0
OTU_2569	0	1	0	0	1	0	0	3	0	0	0	0	0	0	0	0	0	0	0	0	0	0	1	0	0	0	0	0	0	0	0	0	0	0	0	0	0	0	0	0	0	0	0	0	0	0	0	0	0
OTU_2011	0	0	0	0	0	0	0	0	0	0	0	0	0	0	0	0	0	0	0	0	0	0	0	0	0	0	0	0	0	0	0	0	0	0	0	0	0	0	0	0	0	0	0	0	0	0	0	0	0
OTU_1570	0	0	0	0	0	0	0	0	0	0	0	0	2	0	0	0	0	0	0	0	2	1	0	0	0	0	0	0	0	0	0	2	0	0	0	0	0	0	0	0	0	0	0	0	0	0	0	0	0
OTU_2196	1	1	0	0	0	0	1	1	0	0	0	1	2	0	1	1	1	0	1	0	0	0	0	0	0	0	0	0	0	0	0	0	0	2	0	0	0	0	0	0	0	1	0	1	0	0	2	1	0
OTU_827	0	1	1	0	0	0	0	0	0	0	0	0	0	0	0	2	0	0	0	0	0	0	0	0	0	0	0	0	0	0	0	0	0	0	0	1	0	0	2	0	0	0	0	0	4	0	0	1	2
OTU_1864	1	0	3	0	0	1	0	1	0	0	0	1	0	1	0	1	0	0	1	0	0	0	0	0	1	1	1	0	0	0	0	0	0	0	0	0	0	0	0	2	0	0	2	0	0	0	0	0	0
OTU_1629	0	1	1	0	0	0	0	0	0	0	0	0	0	0	0	1	0	0	0	0	0	0	0	0	1	0	0	1	0	0	0	0	0	0	0	0	0	0	0	0	1	0	0	0	0	0	0	0	0
OTU_1672	1	0	5	0	0	0	0	0	2	0	0	0	0	5	0	1	0	0	0	1	0	0	0	0	0	0	0	0	0	0	0	0	0	0	0	0	1	0	0	1	0	0	0	0	1	0	0	0	0
OTU_1042	0	2	4	2	0	1	0	2	0	0	1	0	2	0	0	2	0	1	1	0	1	1	0	0	3	0	0	0	1	0	0	0	0	1	1	1	2	2	1	1	2	0	0	7	0	0	2	1	0
OTU_1680	0	1	0	0	0	0	0	0	0	0	0	1	0	0	0	0	0	0	0	0	0	0	0	0	0	1	0	0	0	0	0	0	0	0	2	0	0	0	0	0	1	0	0	0	0	0	0	0	0
OTU_224	0	5	2	3	0	2	1	0	1	1	0	0	0	2	0	3	3	2	1	1	2	2	2	1	1	3	1	2	2	2	0	1	2	0	0	0	1	0	3	3	1	1	0	0	1	3	1	5	2
OTU_542	1	4	1	0	0	1	0	3	2	0	0	3	0	0	0	0	0	1	0	0	0	3	1	0	0	0	0	2	0	2	0	0	1	2	2	1	0	0	2	1	0	11	0	1	0	0	3	1	0
OTU_1080	2	0	7	1	0	0	0	0	1	0	0	1	0	2	0	0	0	0	1	0	2	3	0	0	0	0	0	0	0	0	0	0	0	0	0	0	0	0	0	0	0	0	0	0	1	0	0	0	2
OTU_2453	0	3	0	0	0	0	0	2	0	0	0	0	0	2	0	2	0	0	0	0	1	0	0	0	1	0	0	0	0	0	1	0	0	3	0	0	0	0	0	0	1	1	0	0	0	0	0	1	0
OTU_495	0	1	1	2	1	1	1	0	1	1	3	0	0	1	0	2	0	0	0	0	1	0	1	1	0	2	1	0	1	2	1	2	0	0	1	1	2	2	2	0	1	0	1	0	0	1	0	0	0
OTU_228	1	1	0	3	2	1	1	3	2	0	2	4	0	1	1	1	2	4	0	1	0	0	3	4	0	1	2	6	1	7	2	4	2	1	1	3	0	2	4	5	1	6	0	1	2	1	2	1	1
OTU_1873	0	1	0	0	1	0	1	0	0	0	0	0	1	0	0	2	1	0	1	1	0	5	1	0	0	0	1	0	1	0	0	0	1	0	0	0	0	1	0	0	1	0	0	1	0	0	0	0	0
OTU_1230	0	2	0	0	0	0	0	0	0	0	0	0	0	1	0	1	0	0	1	0	0	0	0	0	0	1	0	0	0	0	0	0	0	0	0	0	0	1	0	1	0	0	0	0	0	0	0	0	1
OTU_1702	1	0	0	0	0	0	0	0	0	0	0	1	0	0	0	0	0	0	0	0	0	0	0	0	0	0	0	0	0	0	0	0	0	0	0	0	0	0	1	0	0	0	0	0	0	0	0	0	0
OTU_775	4	2	2	2	0	1	0	0	1	0	0	1	0	0	0	1	0	0	0	0	0	0	0	0	0	1	0	6	0	0	0	0	0	0	1	0	1	1	0	0	0	0	0	0	1	0	0	0	1
OTU_1640	0	0	0	3	0	0	0	0	0	0	0	0	0	0	0	0	0	0	0	0	0	0	0	0	0	1	0	1	0	0	0	0	0	1	0	0	0	0	0	0	0	0	0	1	1	0	0	0	0
OTU_1525	0	0	0	1	0	2	0	0	0	0	0	2	0	0	0	0	0	0	1	1	0	0	1	0	1	1	0	0	0	0	0	0	0	0	1	0	0	1	0	0	1	0	0	0	0	2	0	0	0
OTU_1697	0	2	1	0	0	0	0	0	0	1	3	0	0	0	0	0	0	1	0	0	0	0	0	0	1	2	0	0	0	0	0	2	0	0	0	0	0	0	0	0	0	0	0	0	0	0	0	0	0
OTU_277	1	4	2	3	10	1	1	2	1	1	2	4	1	2	1	2	0	1	0	2	2	1	3	2	6	5	0	2	0	1	1	0	0	0	0	3	3	0	1	3	2	0	1	2	1	1	0	1	1
OTU_1868	0	2	2	2	2	1	0	0	0	0	1	1	1	0	0	2	0	3	0	0	1	0	1	1	4	1	0	1	0	1	0	0	0	0	1	7	0	0	4	1	1	0	0	12	1	0	0	1	1
OTU_1217	0	1	0	0	0	1	0	1	1	0	0	0	2	1	0	0	0	0	0	0	0	0	2	0	1	2	1	1	0	1	0	0	0	1	0	2	1	1	0	0	1	1	1	0	0	0	0	2	0
OTU_1364	0	0	0	0	0	0	0	0	0	0	0	0	0	0	1	0	1	0	0	0	0	0	0	0	0	0	0	0	0	1	0	0	0	0	0	1	0	0	0	0	0	0	0	0	0	0	0	0	0
OTU_1506	0	0	1	0	1	1	0	0	0	1	2	0	0	0	0	0	0	0	0	0	1	0	0	0	0	6	0	0	0	0	0	0	0	0	0	0	0	0	0	0	0	0	0	1	1	0	0	0	1
OTU_711	0	1	0	1	0	0	0	2	1	1	0	0	0	1	0	2	0	0	0	0	0	1	0	0	0	1	0	2	1	0	0	0	1	0	0	0	0	0	4	1	1	0	0	2	0	1	1	0	0
OTU_388	3	0	1	8	4	3	0	0	3	2	2	5	3	4	0	0	1	1	0	3	1	1	0	0	4	3	1	5	0	0	0	0	0	0	0	5	3	1	0	3	1	0	0	0	5	1	1	2	0
OTU_1134	1	4	1	2	0	2	0	0	0	0	1	1	0	0	0	0	0	0	0	0	0	0	0	0	3	1	0	1	1	0	0	0	0	0	0	0	3	3	0	0	0	1	0	0	1	0	0	0	0
OTU_454	3	0	0	0	0	0	0	0	0	0	0	1	1	1	0	0	0	1	0	0	0	2	0	2	1	0	0	0	0	5	0	0	0	0	1	0	5	2	1	0	0	0	0	1	0	1	0	1	0
OTU_2106	1	3	0	4	2	1	1	0	2	0	0	2	0	1	0	1	1	1	0	1	2	0	0	0	3	4	4	0	1	0	0	0	3	2	0	2	0	8	1	0	1	2	0	0	1	0	0	2	2
OTU_2481	0	0	0	1	0	0	0	0	0	0	0	0	0	0	0	0	0	0	0	0	0	0	0	0	0	0	0	0	3	0	0	0	0	0	0	0	0	0	0	0	0	0	0	0	0	0	0	0	0
OTU_1173	0	3	0	0	0	0	0	0	0	0	0	0	0	0	0	0	0	0	0	0	0	0	0	0	0	0	0	0	0	2	0	2	0	7	0	0	0	0	0	0	0	1	0	0	0	0	0	0	0
OTU_250	0	7	0	1	0	0	0	6	0	0	2	1	1	1	0	3	1	0	1	1	2	2	1	0	3	0	0	9	2	0	1	3	3	0	3	0	0	0	1	2	2	0	0	0	0	0	2	2	4
OTU_293	0	0	1	1	0	2	1	0	0	1	1	0	2	3	1	1	0	2	0	0	0	2	0	0	0	4	1	1	2	1	0	0	1	1	0	0	0	4	1	0	0	1	0	0	1	0	2	0	1
OTU_273	2	5	2	3	2	2	1	0	5	0	0	1	0	3	3	2	0	0	1	1	0	1	1	0	2	3	0	3	1	1	0	0	0	0	0	0	2	0	2	3	0	0	1	1	0	2	2	2	1
OTU_2296	0	0	0	0	0	0	0	0	0	0	0	0	0	0	0	0	0	0	0	0	0	0	0	0	1	0	0	0	0	0	0	0	0	0	0	0	0	0	0	0	0	0	0	0	0	0	0	1	0
OTU_1354	0	0	2	0	0	0	0	0	1	0	0	0	0	0	0	0	0	0	0	0	0	1	0	0	0	0	2	0	1	0	0	0	0	0	2	0	0	0	0	0	0	0	1	0	0	0	0	0	2
OTU_226	5	2	5	3	1	0	0	2	0	2	1	0	1	1	1	1	5	3	0	4	5	0	5	1	1	3	3	2	8	0	1	0	1	1	3	4	3	2	5	1	2	0	2	2	2	5	1	5	4
OTU_451	5	2	0	0	0	0	3	0	0	4	0	5	0	0	0	0	1	0	0	0	1	0	1	0	1	0	0	3	0	0	1	0	0	0	0	0	0	1	1	0	0	0	0	0	0	0	0	1	0
OTU_1185	2	0	0	0	0	3	0	1	1	0	0	1	0	2	2	0	0	0	0	1	0	1	2	1	2	0	0	5	0	0	0	2	0	0	0	0	0	3	0	0	0	0	0	2	0	0	1	0	0
OTU_530	1	2	0	2	2	1	1	0	1	3	0	3	0	0	0	0	0	1	2	0	1	0	0	1	3	6	0	0	0	1	0	0	0	2	0	1	4	2	1	1	2	0	0	2	2	3	0	0	0
OTU_491	0	1	1	1	0	0	0	0	0	0	0	0	1	1	2	3	0	1	0	0	0	0	0	0	0	0	0	1	1	0	0	0	1	0	0	1	0	0	1	0	1	0	0	0	0	0	0	2	0
OTU_474	0	1	2	2	0	1	0	0	2	2	0	2	0	3	0	0	1	1	2	0	1	0	2	0	3	0	0	1	1	0	0	1	0	2	0	3	0	1	0	0	0	0	0	5	0	0	1	0	0
OTU_1129	0	0	0	2	0	0	1	0	0	0	0	0	0	0	2	0	0	0	0	0	0	0	0	0	0	0	0	0	0	0	0	0	0	0	0	0	2	1	0	0	0	0	0	0	2	0	0	0	0
OTU_515	3	15	1	3	2	4	1	6	4	0	1	2	1	1	0	0	1	1	2	1	0	4	2	2	1	4	1	5	2	3	1	2	3	0	2	2	0	2	1	2	2	0	1	2	3	1	1	0	5
OTU_1851	0	0	0	0	0	0	0	0	0	0	0	0	0	0	0	0	0	0	0	0	0	0	0	0	0	0	0	0	0	1	0	0	0	0	0	0	1	0	0	0	0	0	0	0	0	1	0	0	0
OTU_605	1	1	1	8	0	0	0	0	0	0	0	0	0	1	0	1	1	0	0	0	0	0	1	1	0	0	0	0	0	0	1	0	0	0	0	1	1	0	0	0	0	0	0	0	1	1	0	1	0
OTU_1382	0	0	0	0	0	0	0	0	0	0	0	2	0	0	0	0	0	0	0	0	0	0	0	0	0	0	0	1	0	0	0	0	0	0	0	2	0	1	0	0	1	1	0	0	0	0	0	0	0
OTU_1967	0	0	0	0	0	0	1	0	0	0	0	0	0	0	1	0	0	0	0	0	0	0	0	0	0	1	0	0	0	1	0	0	0	0	0	1	0	0	0	0	0	0	0	0	0	1	0	0	0
OTU_2141	0	1	0	0	0	0	0	0	0	0	0	0	0	0	0	0	0	0	0	0	0	0	0	0	1	1	0	0	0	0	1	0	0	0	0	0	0	0	0	0	0	0	0	0	0	0	0	0	0
OTU_1383	0	0	0	0	0	0	0	0	1	0	0	0	0	0	1	0	0	0	0	0	0	0	0	0	0	1	0	0	0	0	0	0	0	0	1	0	1	0	0	0	0	0	0	0	0	0	0	2	0
OTU_2048	0	0	0	1	0	0	0	0	0	0	0	0	0	0	0	0	0	0	0	0	0	0	0	0	0	0	1	0	0	0	0	1	0	0	0	0	0	0	0	0	0	0	0	0	0	0	0	0	0
OTU_2114	0	0	0	0	0	1	1	0	0	1	0	4	0	0	0	0	0	1	0	0	1	0	0	0	1	4	2	0	1	0	0	0	0	0	0	0	0	3	0	1	0	1	0	11	0	1	4	0	0
OTU_1706	0	2	1	0	0	1	0	1	0	0	0	2	0	0	0	2	0	0	0	0	0	0	0	0	0	0	4	2	0	0	1	0	0	1	1	0	0	0	0	2	0	1	0	0	0	0	0	0	2
OTU_1371	0	0	0	0	0	0	0	0	1	1	0	0	0	1	0	0	1	0	0	1	1	5	0	0	0	0	2	0	0	2	1	0	3	0	0	2	0	0	0	0	0	0	0	0	0	1	0	0	1
OTU_851	0	0	0	8	0	4	0	1	0	0	0	2	0	1	0	0	1	1	0	0	0	0	0	0	0	0	0	0	1	0	0	0	0	3	1	2	1	2	2	0	0	2	0	0	0	0	0	0	0
OTU_741	1	3	3	2	1	0	1	1	3	1	2	2	0	0	1	2	1	0	0	0	2	2	1	4	2	2	0	1	5	5	2	2	0	0	1	1	1	4	1	0	1	2	3	0	1	0	1	0	0
OTU_632	0	0	2	2	0	1	1	1	1	0	0	1	0	1	0	0	0	1	0	0	1	0	1	0	0	0	1	0	0	1	1	0	0	0	0	0	1	2	1	1	0	1	0	0	3	0	0	0	1
OTU_2077	1	0	1	0	1	0	0	0	0	1	0	0	0	0	2	0	0	0	0	0	0	0	0	0	1	1	0	0	0	0	0	0	0	0	0	0	1	0	0	0	1	0	0	0	0	0	0	0	0
OTU_1282	0	1	0	0	0	0	0	0	0	0	0	0	2	0	0	0	1	0	0	0	2	1	0	0	0	0	0	0	1	0	0	1	0	0	1	0	0	0	0	0	0	0	0	0	0	0	0	2	0
OTU_718	3	1	2	2	2	0	1	1	4	0	3	3	1	1	0	2	0	1	0	0	0	1	3	1	0	4	0	1	2	0	0	1	0	2	0	0	2	3	5	3	0	0	1	4	2	0	0	0	0
OTU_537	1	0	0	1	2	0	0	0	0	1	1	0	0	2	1	0	1	1	1	0	0	0	0	0	1	1	0	0	2	0	0	0	0	0	3	5	0	0	0	0	0	0	0	2	0	0	0	0	0
OTU_1822	0	0	0	0	0	0	1	0	0	0	0	0	0	0	0	0	0	1	0	0	0	0	0	0	0	1	0	0	0	0	0	0	0	0	0	0	0	1	0	0	0	0	0	0	0	0	0	0	0
OTU_523	0	0	0	3	0	4	0	0	1	1	0	2	0	0	0	0	0	1	0	0	0	1	0	0	0	1	1	1	0	0	0	0	1	0	1	0	1	1	0	0	0	0	0	2	1	0	0	0	1
OTU_1273	0	0	1	1	0	0	0	3	1	0	2	0	2	2	3	2	2	0	1	0	0	1	0	0	0	1	0	0	4	0	0	1	0	0	1	2	0	1	3	0	0	1	1	0	1	0	1	1	0
OTU_1169	1	0	0	1	0	0	1	0	2	0	0	0	0	0	0	0	0	0	0	0	1	0	0	2	2	2	0	0	0	0	0	0	0	0	0	0	0	0	2	0	1	0	0	0	0	0	1	0	0
OTU_1043	0	0	0	0	0	0	0	0	0	2	1	0	1	0	0	1	0	0	0	0	0	0	1	0	0	0	0	0	0	0	0	1	0	0	2	2	0	0	0	0	1	0	0	1	0	0	2	0	0
OTU_1426	0	1	1	0	0	0	0	0	1	0	0	0	0	1	0	0	0	0	0	0	0	1	0	1	0	0	0	0	0	0	1	0	0	0	0	0	0	0	0	0	0	0	1	0	0	0	0	1	1
OTU_648	0	1	0	1	9	0	0	0	1	0	0	0	0	1	1	0	1	1	0	1	1	1	0	0	2	0	0	2	0	0	1	0	0	1	2	0	1	6	2	1	0	0	0	0	0	0	1	0	1
OTU_487	3	3	2	1	1	1	3	1	3	0	4	3	0	2	0	0	0	2	1	0	1	0	5	1	2	2	0	4	0	1	0	0	0	0	1	1	1	2	1	1	1	0	0	2	1	0	1	2	0
OTU_1515	0	1	0	0	0	0	1	0	0	0	0	0	0	2	0	0	2	0	0	0	0	0	0	0	0	0	1	0	0	0	1	0	0	0	0	0	0	0	0	0	1	0	0	0	0	0	0	0	0
OTU_1280	0	0	0	0	0	0	0	1	0	0	0	0	1	0	0	0	0	0	0	0	0	0	0	0	0	0	0	0	1	0	0	0	0	0	1	0	0	0	1	0	1	0	0	0	0	0	0	0	0
OTU_1126	0	2	0	9	0	0	0	0	1	1	0	3	0	0	0	0	0	0	0	0	0	0	1	0	5	3	0	2	0	0	0	0	0	0	0	0	0	1	0	0	1	1	0	0	3	1	0	0	0
OTU_2237	0	1	0	0	1	0	0	0	0	0	0	0	1	2	0	0	0	0	0	0	0	0	0	0	0	0	0	0	0	1	0	0	0	0	1	1	0	0	0	0	0	0	0	0	0	0	0	1	0
OTU_588	2	0	5	1	0	1	1	0	1	1	0	1	6	0	2	1	2	1	0	1	2	1	1	0	3	3	1	2	0	0	0	0	1	6	3	0	1	1	1	0	5	0	0	1	0	0	1	1	2
OTU_1150	0	0	1	0	0	0	1	0	0	0	0	0	0	0	0	0	0	0	1	0	0	0	0	0	0	0	0	0	0	0	0	0	0	0	0	0	1	0	0	0	0	0	0	1	0	0	0	0	0
OTU_1247	0	0	0	1	1	1	1	0	1	0	0	0	0	0	0	0	0	0	0	0	0	0	0	0	0	0	0	0	0	0	0	0	0	0	0	1	0	0	0	0	0	0	0	0	0	0	0	0	0
OTU_610	2	0	0	2	0	0	0	1	1	3	0	5	0	0	1	0	0	0	0	0	0	0	1	2	1	0	1	0	2	1	0	0	0	0	0	4	0	1	0	0	0	0	1	0	0	0	1	0	0
OTU_1710	1	0	0	0	0	1	0	0	1	0	1	0	0	0	0	0	0	0	0	0	0	0	0	0	1	0	0	0	2	0	0	0	0	0	0	0	0	0	0	0	0	0	0	0	0	0	1	0	0
OTU_666	0	2	0	1	0	4	1	0	0	1	1	0	0	0	0	1	0	1	0	0	0	0	0	2	2	1	0	1	0	1	0	0	0	0	1	0	4	0	0	1	0	0	0	0	1	0	0	1	0
OTU_2407	1	2	2	0	1	1	1	3	3	1	1	1	0	2	0	1	0	0	1	2	2	3	4	2	0	1	2	0	0	3	2	2	1	0	0	0	1	1	0	3	1	4	1	0	1	0	0	1	1
OTU_327	1	3	2	0	1	1	0	0	1	0	0	2	3	2	1	1	2	1	1	3	2	1	0	0	1	0	4	1	4	0	5	0	1	0	1	1	2	0	6	0	4	0	1	0	0	1	0	2	2
OTU_2509	0	0	0	0	0	0	0	1	0	0	0	0	0	0	0	0	1	0	0	1	0	0	0	0	0	0	0	0	0	0	0	0	0	0	0	0	0	0	0	0	0	0	0	1	0	0	0	1	0
OTU_1816	1	0	0	0	0	0	0	0	0	0	0	0	0	0	0	0	0	1	1	0	0	0	0	0	0	0	0	1	0	0	0	0	0	0	0	0	2	0	0	0	0	0	0	2	0	0	0	0	0
OTU_2037	0	5	4	0	0	0	0	1	0	0	1	0	0	1	0	2	4	0	0	0	0	3	2	0	3	2	2	0	0	0	3	0	0	2	2	1	0	0	0	0	0	0	0	0	0	0	0	1	1
OTU_2256	0	0	0	0	0	0	0	0	0	0	0	0	0	0	0	0	0	0	0	0	0	0	0	0	0	0	0	0	0	0	0	0	0	1	0	0	0	0	0	0	0	1	0	0	0	0	0	0	0
OTU_1370	0	1	0	0	0	0	0	0	0	0	1	0	1	1	0	0	2	0	0	0	0	0	0	0	0	0	0	0	0	0	0	0	0	0	1	0	3	0	0	0	1	0	0	0	1	1	0	1	1
OTU_203	2	6	5	1	0	3	3	2	9	3	3	6	6	5	6	1	5	4	0	9	9	4	5	7	6	6	3	3	2	3	4	4	3	2	3	6	0	5	3	1	3	1	0	3	3	7	3	8	3
OTU_2173	0	0	0	0	0	0	0	0	0	0	0	0	0	0	0	1	0	0	0	0	0	0	0	0	0	0	0	0	1	0	1	0	0	0	0	0	0	0	0	0	0	0	0	0	0	0	0	0	0
OTU_1319	0	2	0	1	0	0	0	1	0	0	0	0	0	0	0	0	0	0	1	0	0	0	0	0	1	0	0	1	1	0	1	0	0	0	0	0	0	0	0	0	0	0	0	0	0	0	0	0	0
OTU_1733	0	3	0	0	0	0	0	0	0	0	0	2	0	1	0	0	1	1	0	0	0	0	0	1	1	0	0	0	0	0	0	0	0	3	0	3	1	1	0	0	0	1	0	0	0	0	0	1	0
OTU_991	0	0	0	4	0	0	0	0	0	0	0	0	0	0	0	0	0	0	0	0	2	0	0	0	1	0	2	2	0	0	0	0	2	0	1	0	0	1	0	0	0	0	0	0	0	0	0	2	0
OTU_1755	0	0	0	0	0	0	0	0	0	1	0	0	0	0	0	0	0	0	0	0	0	0	0	0	0	0	0	0	0	0	0	0	0	0	0	0	0	1	0	0	0	0	0	0	0	0	1	0	0
OTU_638	0	2	0	2	0	1	1	0	0	0	0	1	0	0	0	1	0	2	1	0	1	0	1	0	0	7	0	3	0	0	0	0	1	1	1	0	0	0	1	1	0	4	0	0	1	0	0	0	0
OTU_1819	0	2	1	1	2	0	1	0	2	0	2	2	0	1	0	1	1	4	0	0	1	0	1	1	3	11	3	1	1	2	0	3	0	4	0	0	0	8	0	1	0	3	0	2	0	5	1	1	0
OTU_1746	0	3	4	0	0	1	0	2	0	0	0	0	0	0	0	0	0	1	0	0	0	0	0	0	0	0	0	1	0	0	1	0	0	0	0	1	0	1	0	0	0	0	0	0	0	0	0	0	0
OTU_1130	2	1	0	1	0	0	0	1	1	0	0	1	2	0	1	0	0	0	0	0	0	1	0	1	1	0	0	0	1	0	0	0	1	0	0	2	0	0	0	0	0	0	0	0	0	0	0	1	0
OTU_1268	0	0	0	0	0	0	0	6	0	0	0	0	0	0	0	0	0	0	0	0	0	0	0	0	0	0	0	0	0	0	0	0	0	0	0	0	0	0	0	0	0	0	0	0	0	0	0	0	0
OTU_1500	0	0	1	1	0	1	0	2	0	0	0	0	0	0	3	2	3	0	0	0	0	1	0	0	0	1	0	0	0	1	0	1	0	0	1	0	0	0	0	1	0	0	0	0	0	0	0	1	0
OTU_2050	0	0	2	0	0	1	0	0	0	0	0	0	0	0	0	0	0	0	3	0	0	0	1	0	0	0	0	0	0	0	0	0	0	0	0	0	0	0	1	0	0	0	0	0	0	0	0	0	0
OTU_1599	1	1	1	0	0	1	1	0	1	0	0	4	0	0	2	0	0	0	0	1	0	0	0	1	1	0	0	0	0	0	0	0	0	0	0	0	0	0	0	0	0	0	0	0	0	0	0	1	0
OTU_2283	0	0	1	0	0	1	0	0	0	0	0	0	0	0	1	0	0	0	0	0	0	0	0	0	0	0	0	1	0	0	0	0	0	0	0	0	1	2	0	0	0	0	0	1	1	0	0	0	0
OTU_789	2	2	1	0	1	1	1	4	0	0	2	0	1	0	0	0	1	0	0	0	2	0	0	2	2	1	1	2	0	0	4	0	2	0	0	0	3	0	0	1	0	0	0	0	0	0	1	0	0
OTU_614	0	6	1	1	0	0	0	1	0	0	0	0	1	0	1	1	0	0	1	1	0	2	0	0	0	0	1	2	0	0	0	1	0	0	0	0	1	0	0	0	3	0	0	0	0	0	0	1	1
OTU_1061	0	0	2	0	1	1	0	0	0	0	1	0	0	1	0	0	0	0	2	0	0	0	0	0	0	2	0	1	0	0	1	0	0	0	0	1	1	0	0	0	0	0	0	0	1	0	0	1	0
OTU_1402	0	0	0	3	0	1	1	0	0	0	0	4	0	0	1	1	0	0	0	0	0	0	0	0	0	0	0	0	1	0	0	0	0	0	0	0	1	0	1	3	0	0	0	0	0	0	0	1	0
OTU_323	1	3	2	0	4	0	0	2	0	1	1	0	0	1	0	1	2	2	0	1	0	1	0	0	3	3	0	2	2	1	0	0	2	0	0	1	1	1	0	24	1	1	3	0	0	0	0	4	7
OTU_2142	0	0	0	0	1	0	0	1	0	0	1	0	0	0	0	0	1	0	0	0	0	0	0	0	0	0	0	0	0	0	0	1	0	0	0	0	0	0	0	0	0	0	0	0	0	0	1	0	0
OTU_1945	0	1	0	0	0	0	0	1	1	0	0	0	1	0	0	0	1	1	0	0	0	0	1	0	0	0	0	2	0	0	1	0	0	1	0	1	0	0	0	0	0	1	0	0	0	1	0	0	0
OTU_2104	0	0	0	0	0	1	0	0	0	0	0	0	3	0	0	0	0	0	0	0	0	0	0	0	0	0	3	0	0	0	0	0	0	0	0	0	0	0	0	0	0	0	0	0	0	1	0	0	1
OTU_180	1	5	8	2	0	6	1	0	7	2	1	4	1	2	1	2	4	4	2	1	0	2	1	2	4	4	2	4	3	1	4	2	0	0	3	1	0	4	0	4	1	2	0	2	1	0	1	4	1
OTU_355	7	2	0	1	1	1	0	0	2	1	6	1	2	1	2	0	1	1	1	0	0	0	2	0	2	1	0	1	0	0	0	0	0	0	0	0	1	1	0	0	2	1	1	0	3	0	3	0	1
OTU_877	0	0	1	0	0	1	0	1	0	0	1	0	0	0	0	0	0	0	0	1	2	2	0	0	0	0	0	0	0	1	1	1	2	1	0	0	0	0	1	0	0	0	0	0	0	1	0	0	1
OTU_2294	1	0	0	0	0	0	0	0	0	0	0	0	0	0	0	0	0	0	0	0	1	0	0	0	0	0	0	0	0	0	0	0	0	0	0	1	0	1	0	1	0	0	0	0	0	0	0	0	0
OTU_2084	0	0	0	0	0	0	0	0	0	0	0	0	0	0	0	0	0	0	0	0	0	0	0	0	0	0	0	0	0	0	2	0	0	0	0	0	0	0	0	0	0	0	0	0	0	0	0	0	0
OTU_1630	0	0	2	0	0	0	0	0	0	0	0	0	0	0	0	0	1	0	0	0	0	0	0	0	0	5	0	0	0	0	0	0	1	0	0	0	0	0	0	0	1	0	0	0	0	0	0	0	1
OTU_1436	1	0	1	3	1	0	0	1	0	1	0	1	0	0	0	0	0	1	0	0	0	0	0	1	1	1	0	1	1	1	1	0	0	0	0	1	0	1	0	0	0	0	0	2	1	1	0	0	2
OTU_1568	0	1	0	0	1	0	0	0	0	0	0	1	2	1	0	1	0	2	0	1	0	0	0	2	0	1	0	0	0	0	1	1	0	2	0	0	0	1	0	1	0	1	1	0	1	0	0	0	1
OTU_1344	0	0	0	0	0	1	0	0	0	0	0	0	0	2	0	0	0	0	0	0	1	1	0	0	0	0	0	0	0	0	0	0	1	0	0	0	0	0	0	0	1	0	0	0	0	0	0	0	0
OTU_172	2	6	3	3	0	2	4	1	4	2	4	7	1	1	0	1	0	1	2	1	0	0	0	2	1	12	0	1	2	1	0	2	0	0	1	5	3	5	3	1	0	0	0	4	6	2	0	2	0
OTU_1458	0	1	0	0	0	1	0	0	1	1	0	0	0	0	0	0	0	1	0	0	0	0	1	0	0	0	0	0	0	0	0	1	0	0	0	1	0	0	0	0	0	1	0	0	0	0	1	0	2
OTU_954	0	0	0	0	0	0	0	0	0	1	0	0	0	0	1	0	0	0	0	0	0	0	0	1	0	0	1	0	0	0	0	0	0	0	0	0	0	0	0	0	0	0	0	1	0	1	0	0	0
OTU_771	2	2	2	1	0	0	0	1	7	1	0	0	2	5	4	1	2	1	2	0	7	1	6	3	6	9	0	0	3	1	3	4	0	0	3	0	0	7	4	7	5	0	2	2	0	2	0	3	3
OTU_1738	1	1	1	1	0	1	0	0	2	0	0	3	0	1	0	0	0	0	0	0	0	0	0	1	2	1	0	0	0	0	0	1	1	0	0	0	2	1	1	1	0	1	0	0	0	0	3	0	0
OTU_924	0	0	0	0	0	0	1	0	0	1	0	0	0	0	0	2	0	0	0	0	0	0	0	0	0	0	0	1	0	0	0	0	0	0	0	0	0	6	0	1	0	0	0	0	1	0	0	0	1
OTU_902	0	3	1	0	1	0	1	0	1	1	2	2	0	0	0	0	1	0	0	0	1	1	1	0	0	1	0	0	0	2	0	0	0	6	0	1	0	0	0	0	0	1	0	2	0	0	0	0	0
OTU_1820	0	2	2	3	1	0	0	1	0	0	0	0	0	0	1	0	0	0	0	0	0	0	0	0	0	0	1	0	0	0	0	0	0	0	0	0	0	0	0	0	0	0	0	0	0	0	0	0	0
OTU_1241	0	0	0	0	1	0	0	0	1	0	0	1	0	0	0	1	0	0	0	0	0	0	0	0	0	1	0	0	0	0	0	1	1	0	0	1	1	1	0	0	0	0	0	0	0	0	0	0	0
OTU_2482	1	0	1	0	0	1	1	0	0	0	0	0	1	0	0	1	0	0	0	0	1	0	0	1	0	0	0	0	0	0	0	0	0	0	4	0	2	0	0	1	0	0	0	0	0	1	0	2	2
OTU_1741	0	0	1	1	0	2	0	0	2	1	0	1	0	0	0	0	1	1	0	0	0	0	0	0	1	2	0	1	0	0	0	1	1	1	0	0	2	1	0	0	0	0	0	1	1	0	0	1	0
OTU_1260	0	1	1	0	0	4	0	0	0	0	0	0	1	1	0	0	0	0	0	0	1	0	2	0	0	3	0	0	3	0	0	1	0	0	0	0	0	1	1	1	0	0	0	0	0	0	0	1	0
OTU_960	0	0	1	0	0	1	0	1	1	0	0	0	0	0	0	0	0	0	0	0	0	1	0	0	0	0	0	0	0	0	0	0	0	0	1	2	0	0	0	0	0	1	1	0	0	0	0	0	2
OTU_572	0	1	1	1	1	1	0	0	0	0	0	0	0	1	0	1	1	0	0	2	0	0	0	0	0	0	0	1	2	0	1	0	0	0	1	0	0	2	1	4	0	1	1	2	1	0	1	0	0
OTU_1808	0	0	0	0	0	0	0	0	0	0	0	0	0	0	0	0	2	0	0	0	0	0	0	0	0	0	0	0	0	0	0	0	0	0	0	0	1	0	0	0	0	0	0	0	0	0	0	0	0
OTU_1132	0	3	0	0	2	1	0	2	0	0	3	2	2	0	0	1	2	2	0	0	1	0	0	1	3	4	0	0	0	0	1	0	0	0	8	2	0	0	0	0	1	0	0	0	2	0	0	0	0
OTU_1002	0	0	0	0	0	0	0	0	2	0	0	0	0	0	0	2	2	0	0	0	2	1	0	0	0	0	0	2	0	0	0	1	0	0	0	0	0	1	0	0	0	0	0	0	0	0	0	0	0
OTU_256	0	4	14	0	1	0	4	3	1	0	0	0	2	2	2	3	4	0	1	6	4	5	1	0	0	1	1	0	0	0	3	0	2	0	2	0	1	0	0	2	6	0	6	0	0	1	1	3	8
OTU_1926	0	2	0	0	0	0	0	0	0	0	0	0	0	0	0	0	0	0	0	0	0	0	0	0	0	0	0	0	0	0	0	0	0	0	0	0	0	1	2	1	0	0	0	0	0	0	0	0	0
OTU_856	0	1	1	1	0	0	0	0	1	0	0	1	0	1	0	0	0	2	0	0	1	2	0	1	0	0	0	0	0	1	0	0	0	0	0	0	1	0	0	1	1	0	0	0	0	0	1	0	0
OTU_646	0	1	0	1	1	0	0	0	1	0	0	1	0	0	1	0	0	0	0	0	0	3	0	0	0	0	0	0	0	0	0	0	1	0	0	0	0	1	0	0	0	3	0	0	2	0	0	0	0
OTU_1266	0	0	0	1	1	0	0	0	0	0	0	0	0	0	0	0	0	1	0	0	0	0	0	0	2	0	0	0	0	0	0	0	0	0	0	1	0	0	1	0	0	0	0	0	0	0	0	0	0
OTU_990	2	5	1	2	1	0	2	3	0	0	0	2	5	0	0	3	0	4	0	5	3	2	3	1	2	2	0	0	7	3	0	3	0	1	0	0	1	0	2	0	0	4	2	2	3	0	1	0	0
OTU_2530	0	1	1	0	0	1	0	0	0	0	0	0	0	0	1	2	0	0	1	0	0	0	0	0	0	0	0	0	1	0	0	0	0	0	1	1	0	0	2	1	0	0	0	0	0	0	0	0	1
OTU_1206	0	0	0	0	0	0	0	0	0	0	0	0	0	1	0	0	0	0	0	0	0	0	0	0	1	5	0	0	0	0	0	0	0	0	0	0	0	0	0	0	0	0	0	0	0	0	0	0	0
OTU_1090	0	2	0	0	2	0	3	0	0	0	0	0	1	0	1	0	1	0	0	0	0	1	1	0	0	0	1	0	0	1	1	0	0	0	0	1	2	0	0	1	0	0	0	0	1	1	0	2	1
OTU_1782	0	0	0	1	0	0	2	0	0	0	0	1	0	0	0	0	0	0	0	0	0	0	0	0	1	1	0	1	0	0	0	0	0	0	0	1	0	0	0	0	1	0	0	0	0	0	0	0	0
OTU_375	1	0	0	3	1	0	0	1	0	0	1	0	0	0	0	0	1	0	1	0	0	0	1	0	1	2	1	2	1	1	0	4	0	4	0	0	1	0	0	1	0	1	0	0	0	1	1	0	0
OTU_715	0	0	0	0	0	0	0	0	0	0	0	2	0	0	0	0	0	0	0	0	0	0	0	4	0	0	0	0	0	0	0	0	0	1	0	0	0	2	1	0	0	0	0	0	4	0	0	0	0
OTU_1778	0	1	1	1	0	2	0	0	1	1	0	1	1	1	0	0	2	0	0	0	0	1	0	0	0	0	0	1	0	0	0	0	1	0	0	0	2	1	1	0	0	0	0	1	2	0	0	0	5
OTU_591	0	4	0	0	0	0	1	2	2	0	0	0	0	0	0	0	0	3	0	0	0	0	1	0	1	3	1	1	0	0	0	10	0	2	0	0	0	0	0	0	0	0	0	2	0	0	0	0	1
OTU_1509	0	5	2	0	2	0	0	0	0	0	1	0	1	0	0	1	0	0	0	0	0	0	1	1	0	0	1	0	0	0	1	0	1	0	0	0	0	0	0	0	0	1	0	1	0	0	0	0	0
OTU_1203	1	1	1	0	1	1	0	0	1	0	1	0	0	1	0	0	1	1	0	0	1	0	0	0	0	3	0	0	0	0	0	0	0	2	0	0	0	3	0	0	2	0	0	0	0	1	0	0	0
OTU_198	0	0	3	3	0	2	4	0	2	1	0	4	0	1	2	1	1	2	2	1	2	0	1	1	3	9	1	2	0	0	2	3	0	0	1	3	5	3	1	2	0	0	1	2	5	0	1	1	0
OTU_1425	0	4	0	1	0	3	1	0	1	0	1	0	3	0	1	5	2	0	3	2	0	2	0	0	0	1	1	0	1	0	0	0	1	0	1	0	0	0	1	1	0	0	0	0	0	0	0	0	4
OTU_2192	0	0	0	0	0	0	0	0	0	0	0	0	0	0	0	0	0	0	0	1	0	0	0	0	0	0	0	0	0	0	0	0	0	0	0	0	0	0	0	0	0	0	0	0	0	0	0	0	0
OTU_1492	0	1	0	0	0	0	0	0	2	0	0	0	0	0	0	0	2	0	0	0	0	0	0	0	0	0	0	0	1	0	0	0	1	0	0	0	0	0	0	1	0	0	0	0	0	0	0	0	0
OTU_465	0	2	2	1	0	1	0	1	2	0	1	2	0	1	1	2	1	0	0	0	1	0	2	1	0	3	0	0	0	0	0	1	2	3	2	1	0	1	5	1	1	2	0	1	0	0	0	0	0
OTU_758	0	6	0	1	1	0	0	1	3	3	0	3	4	0	1	2	1	2	0	1	1	0	2	3	0	1	1	0	3	3	1	2	1	0	1	0	1	2	0	2	1	0	0	1	2	0	0	0	0
OTU_358	2	2	0	1	1	7	1	0	2	0	0	1	0	1	1	0	0	0	0	1	1	0	1	7	3	4	0	2	0	0	1	0	0	0	0	1	0	0	0	3	1	0	0	2	0	3	1	1	0
OTU_175	2	3	4	4	3	1	0	3	4	0	2	0	7	8	1	5	8	1	1	2	1	5	1	1	2	1	1	4	2	0	3	2	1	0	1	2	0	2	2	2	2	0	0	1	3	3	0	1	1
OTU_1393	0	0	2	0	0	0	0	1	2	0	0	0	1	0	0	4	0	0	0	1	0	0	0	0	2	0	0	1	1	0	1	0	0	1	0	0	0	0	0	0	0	0	1	0	1	0	0	0	0
OTU_2033	0	0	0	0	0	0	0	0	0	0	0	0	0	0	0	0	0	0	0	0	0	0	0	0	0	0	1	0	0	0	0	0	0	0	0	0	0	0	0	3	0	0	0	0	0	0	0	0	0
OTU_1550	0	1	3	0	1	0	2	0	1	0	0	0	0	2	1	0	1	0	0	0	0	0	0	2	1	1	0	1	1	0	0	1	0	1	0	0	0	0	1	0	1	1	0	0	1	0	1	0	0
OTU_1917	0	0	0	0	0	0	0	0	0	0	0	0	0	0	0	0	1	0	0	0	0	4	0	0	0	0	0	0	0	0	0	0	0	0	0	0	0	0	0	0	0	0	0	0	0	0	0	0	0
OTU_2053	1	0	0	0	0	0	0	0	2	0	0	0	0	1	0	0	0	0	0	0	1	0	1	0	0	0	0	0	0	0	0	0	0	0	1	0	0	3	0	1	0	1	0	0	2	0	0	2	0
OTU_1966	1	1	1	0	0	2	0	0	1	1	0	0	0	0	0	1	0	0	0	0	0	0	1	1	0	0	0	0	0	0	0	0	0	0	0	0	0	0	0	0	0	0	0	0	0	0	0	0	0
OTU_1094	0	0	0	0	0	0	0	0	1	0	0	1	0	0	0	0	0	1	0	0	0	0	0	0	0	1	0	0	0	0	0	0	0	0	2	0	0	0	0	1	0	0	0	0	0	1	1	0	0
OTU_777	1	3	0	1	2	3	1	0	2	1	2	5	0	0	0	2	1	2	0	0	0	1	0	1	1	3	2	3	8	0	0	1	0	0	0	4	0	0	2	0	0	0	0	1	2	0	1	1	0
OTU_1912	0	1	0	1	0	0	0	0	0	0	0	0	1	0	0	0	0	0	0	0	0	0	0	0	0	0	1	0	0	0	0	0	0	0	0	1	1	0	1	0	0	0	0	0	0	0	0	0	0
OTU_1524	0	1	0	0	0	0	0	0	0	0	1	1	1	0	0	0	0	0	0	0	0	0	0	0	0	0	0	1	0	0	0	0	0	0	0	0	0	0	0	1	0	0	0	0	0	0	0	0	0
OTU_811	2	2	0	1	0	0	0	0	0	1	0	0	0	0	0	0	1	0	0	0	1	0	0	0	2	0	2	2	0	0	0	0	0	0	0	3	0	2	0	0	2	0	0	0	0	0	0	0	0
OTU_2241	0	0	0	0	0	0	0	0	0	0	0	0	0	0	0	0	0	0	0	0	0	1	4	0	0	0	0	0	0	0	0	0	0	1	0	0	0	0	0	0	0	0	0	0	0	0	0	1	0
OTU_1881	0	0	0	0	0	1	0	0	0	0	0	0	0	0	0	0	0	1	0	0	0	0	0	0	0	1	0	1	0	0	0	0	3	0	0	3	0	0	0	0	0	0	0	0	0	0	2	0	0
OTU_340	1	0	2	0	2	1	3	2	2	1	0	0	0	2	1	1	0	1	0	0	2	1	0	1	1	2	0	4	4	0	1	0	1	0	1	3	0	2	4	1	0	1	1	1	1	2	1	0	0
OTU_1889	0	0	0	0	0	0	0	0	0	2	1	0	0	0	0	0	0	0	0	0	0	0	0	0	0	1	0	1	0	0	0	0	0	0	0	0	0	0	0	0	0	0	0	1	0	0	0	0	0
OTU_1661	0	2	1	1	0	0	0	0	0	0	0	3	0	1	0	0	1	0	0	0	0	2	0	0	0	2	0	0	0	0	0	0	0	0	0	0	0	0	1	0	0	0	0	0	0	1	0	0	0
OTU_1673	1	1	0	0	0	0	0	0	0	0	0	0	0	0	0	0	0	0	0	0	0	0	5	0	0	1	0	0	0	0	0	1	0	0	0	0	0	0	0	0	0	0	0	0	0	0	0	0	0
OTU_1918	0	0	0	0	0	0	0	0	0	0	0	0	0	0	0	0	0	0	0	0	0	0	3	0	0	2	0	0	0	0	0	1	1	0	0	0	0	0	0	0	3	0	0	0	0	0	0	0	0
OTU_1809	0	1	1	0	0	0	0	2	2	1	0	0	0	0	0	0	0	0	0	0	0	0	0	0	0	0	0	2	2	0	0	0	0	0	0	2	0	1	0	2	0	0	0	0	0	0	0	0	0
OTU_2222	0	0	0	0	0	0	0	0	0	0	1	1	0	0	0	0	0	0	0	1	0	0	0	0	0	0	0	0	0	0	0	0	0	0	0	0	0	0	0	0	1	0	0	0	1	0	1	0	0
OTU_1036	0	0	0	2	0	1	0	0	0	1	0	0	1	0	0	0	0	0	0	1	0	2	0	0	3	0	0	0	0	0	1	0	1	0	0	1	0	0	8	0	0	0	0	3	0	0	0	1	0
OTU_1585	2	0	0	1	0	0	0	0	4	0	0	0	0	1	0	0	0	0	0	0	1	0	0	0	0	0	0	0	2	1	1	0	0	0	0	0	1	0	0	0	2	1	0	0	0	0	0	1	0
OTU_1315	0	0	0	1	0	0	1	0	2	0	0	0	0	0	0	0	0	0	0	0	0	0	0	0	0	0	0	0	0	0	0	0	0	0	0	1	0	0	0	0	0	0	0	1	0	0	0	0	0
OTU_1276	1	0	0	1	2	3	0	0	0	0	0	3	0	0	0	0	0	0	0	0	0	0	0	0	0	2	0	0	0	0	0	0	0	0	0	0	0	1	0	1	0	0	0	0	0	2	1	0	1
OTU_2216	0	0	1	1	0	0	0	0	0	0	0	0	0	0	0	3	0	0	0	0	1	0	1	0	0	0	0	0	0	0	0	0	0	0	0	0	0	0	2	0	0	0	0	0	0	0	0	0	0
OTU_635	0	1	0	0	2	0	0	1	0	0	1	0	1	0	0	0	0	0	0	0	0	2	2	0	0	1	0	0	0	2	0	5	1	0	0	0	0	0	0	0	1	0	0	0	0	0	0	1	2
OTU_808	1	1	0	0	0	0	1	0	0	0	0	0	0	0	0	2	1	0	0	0	0	0	0	0	0	0	0	0	0	0	0	0	0	0	9	0	0	0	0	0	0	0	0	0	0	0	0	0	0
OTU_1242	0	0	0	0	3	0	0	0	2	0	0	0	0	0	0	2	0	0	0	0	0	0	0	0	0	0	0	0	0	0	0	0	0	0	0	0	0	0	0	0	0	0	0	0	0	1	0	0	0
OTU_2093	0	0	0	0	0	0	0	0	0	0	0	0	0	0	0	0	0	0	0	0	0	0	0	0	0	0	0	0	0	0	0	0	1	0	0	0	0	0	0	3	0	0	0	0	0	0	0	0	0
OTU_1871	0	0	1	1	0	0	0	0	0	1	0	0	0	0	1	0	0	0	0	0	0	0	0	0	0	0	0	0	0	0	0	0	0	0	0	0	0	0	0	0	0	0	0	0	0	0	0	1	1
OTU_1483	0	0	3	0	0	0	0	0	0	0	0	1	0	0	0	1	0	0	7	0	0	0	0	0	0	0	0	2	1	0	1	0	0	1	0	0	0	0	0	0	0	0	0	1	0	0	0	1	0
OTU_122	2	5	3	4	5	3	8	1	1	2	5	2	0	1	0	0	0	1	0	0	1	0	6	1	6	5	0	4	1	1	0	1	1	0	2	1	5	4	1	3	0	0	0	2	3	0	2	0	0
OTU_1486	0	3	2	0	0	1	0	0	1	0	0	0	0	2	0	5	1	0	1	0	0	3	0	0	0	3	1	2	0	0	0	0	0	0	0	1	3	1	0	0	0	0	0	0	1	1	0	0	0
OTU_912	1	0	0	0	0	0	0	2	0	0	0	0	0	1	0	0	1	0	0	0	0	0	0	0	0	1	2	1	0	0	0	0	0	0	2	0	0	1	0	0	1	0	0	0	0	0	0	1	0
OTU_439	2	2	10	0	0	0	1	0	1	0	1	1	0	2	1	2	1	2	1	0	1	0	2	2	4	0	10	0	2	0	2	0	1	0	0	0	0	1	6	2	1	5	1	1	1	0	0	1	0
OTU_1016	0	0	2	0	0	0	0	0	1	0	0	0	0	0	0	5	0	0	3	0	0	1	0	0	0	0	1	0	0	0	0	0	0	0	0	0	0	0	0	1	0	0	0	0	0	0	0	0	2
OTU_1275	0	1	0	1	0	0	1	0	0	0	0	0	1	0	0	1	1	0	0	0	0	0	0	0	2	4	1	0	1	0	0	1	0	1	0	0	0	0	1	0	0	1	0	1	0	0	0	1	0
OTU_620	0	1	0	1	0	0	0	0	1	1	0	6	1	0	0	0	0	0	0	2	2	0	0	1	5	1	0	0	0	0	0	0	0	0	0	0	1	0	0	0	0	0	0	0	1	0	1	0	0
OTU_975	0	0	0	0	1	0	0	0	0	0	0	1	0	0	0	0	0	0	0	0	0	0	0	1	0	3	0	1	0	0	0	0	0	0	0	0	0	0	2	0	0	0	0	0	0	0	0	0	0
OTU_818	2	2	2	3	0	0	3	3	1	2	1	2	0	1	1	0	3	0	1	0	3	1	5	0	1	4	0	2	3	3	0	1	0	1	0	0	0	0	0	0	1	4	0	1	0	2	4	1	5
OTU_1633	0	0	0	0	0	0	0	0	0	0	0	0	0	0	0	0	0	0	0	0	0	0	0	0	0	0	0	0	0	0	0	0	0	0	0	0	4	0	1	1	0	0	0	0	0	0	0	0	0
OTU_1289	0	0	0	0	0	1	0	0	0	0	0	0	0	0	0	0	0	0	0	0	0	0	0	0	0	0	0	0	0	0	0	0	0	0	0	0	1	0	0	0	0	0	0	0	0	0	0	0	0
OTU_608	6	2	3	4	1	1	0	1	1	1	0	1	0	1	2	2	1	2	0	3	1	3	0	1	0	1	1	2	1	2	7	0	1	0	1	2	2	0	0	3	1	1	4	3	1	1	1	1	0
OTU_1110	0	5	0	0	0	0	0	2	0	0	0	0	0	2	1	0	0	2	0	0	0	0	2	0	0	0	0	0	1	0	0	0	1	1	0	1	0	0	0	0	2	1	0	1	0	0	0	0	0
OTU_854	2	5	4	4	0	2	1	4	6	4	1	3	5	2	4	2	2	6	1	1	0	2	5	2	4	9	4	2	1	5	1	7	1	1	1	4	4	3	3	2	3	3	0	2	0	1	2	1	2
OTU_2495	0	1	0	1	0	1	2	0	1	0	0	1	1	0	0	1	0	0	0	1	0	0	0	0	0	0	0	0	0	0	0	0	0	1	0	1	0	1	0	0	0	0	0	0	0	0	0	0	0
OTU_1429	0	0	0	2	0	0	0	0	0	0	0	0	0	1	0	2	1	0	0	0	0	0	0	0	0	0	0	1	0	0	0	0	0	0	0	0	0	0	1	0	1	0	0	0	1	0	0	0	1
OTU_1277	0	3	0	0	2	0	1	0	0	0	0	0	1	0	0	0	0	3	0	0	0	1	0	0	1	3	0	0	0	0	0	0	0	0	0	1	0	0	0	0	0	0	0	0	0	1	0	0	0
OTU_817	0	0	1	0	0	0	0	1	0	0	0	0	0	1	1	1	0	0	0	0	0	0	0	0	0	0	0	1	0	0	0	0	2	0	0	0	0	0	0	0	0	1	1	1	0	0	0	0	1
OTU_1968	0	0	2	0	0	0	0	0	0	0	0	0	0	0	0	0	0	0	0	0	0	0	0	0	0	0	0	0	0	0	0	0	0	0	0	0	0	0	0	0	0	0	0	0	0	0	0	0	0
OTU_1518	0	0	0	0	1	0	0	0	2	0	0	0	0	0	0	0	0	0	0	0	0	0	0	0	1	1	0	0	0	0	1	0	0	0	0	0	0	1	0	0	1	1	0	1	0	0	0	0	0
OTU_2016	0	0	0	0	0	0	0	0	0	0	0	1	0	0	0	3	0	0	0	0	0	0	0	0	0	1	0	0	2	1	0	0	0	0	0	0	0	0	0	0	3	0	0	2	0	0	0	0	0
OTU_1076	0	0	1	1	1	0	0	0	1	1	0	0	4	0	0	1	0	0	0	0	2	0	0	2	0	7	0	1	0	0	1	1	0	0	0	1	1	1	1	1	1	0	0	0	3	0	0	0	0
OTU_337	0	0	1	6	1	0	3	0	0	0	0	1	0	0	0	0	0	0	0	0	1	0	0	0	0	12	0	0	0	0	0	0	0	0	0	0	0	0	0	0	0	0	0	0	1	0	0	1	1
OTU_2074	0	0	0	0	0	0	0	0	0	0	0	0	0	0	0	0	0	0	0	0	0	0	0	0	0	0	0	0	0	0	0	0	0	0	0	0	0	0	0	0	0	0	0	0	0	0	0	0	0
OTU_664	0	0	1	0	1	0	0	1	0	0	0	1	0	3	0	1	0	0	0	0	0	1	0	0	0	0	0	1	0	1	0	1	0	0	2	0	0	0	0	1	1	0	0	2	0	0	0	1	0
OTU_634	0	0	1	0	0	0	0	0	0	0	0	0	0	0	0	0	0	0	0	0	0	1	0	0	0	0	0	0	0	0	0	0	0	1	0	0	0	0	14	2	0	1	1	0	0	0	0	0	0
OTU_958	0	0	0	1	0	0	0	0	0	0	0	1	0	0	0	1	0	1	0	0	1	1	0	0	1	1	0	1	0	0	1	1	0	1	0	0	0	2	1	1	1	0	0	0	0	0	0	0	0
OTU_1249	0	5	0	1	0	0	0	1	0	0	0	1	0	0	2	0	0	1	1	0	0	1	0	1	0	3	0	0	1	0	0	0	1	0	0	1	0	0	0	0	0	1	0	0	1	1	0	0	0
OTU_1545	0	0	3	0	1	0	1	0	0	0	0	0	1	0	0	0	0	0	0	0	0	1	0	0	0	0	0	0	0	0	0	0	0	0	0	0	0	0	0	0	0	0	0	0	0	0	0	0	0
OTU_403	0	7	1	1	0	1	0	6	2	1	1	0	1	1	1	1	1	1	0	0	3	3	3	0	4	2	0	0	1	1	3	1	2	0	3	1	0	0	0	2	0	0	1	0	2	1	0	2	1
OTU_1204	0	0	0	0	0	1	0	0	0	0	0	7	0	0	0	0	0	0	0	0	0	0	0	1	0	0	0	0	0	0	0	0	0	0	0	0	0	0	1	0	0	0	0	1	0	0	0	0	0
OTU_2086	0	0	0	0	0	0	0	0	0	0	0	0	0	0	0	0	0	0	0	0	0	0	0	0	0	0	0	0	0	0	0	0	0	0	0	0	0	0	0	0	0	0	0	0	0	0	0	0	0
OTU_483	1	8	4	2	0	0	0	4	6	0	0	1	1	0	0	2	0	0	0	1	2	2	0	0	0	0	0	0	2	0	0	2	0	0	0	0	1	0	0	0	0	0	0	0	0	1	0	0	3
OTU_2211	0	1	0	0	0	0	0	0	0	0	0	0	1	0	0	0	0	0	0	0	0	0	0	0	0	0	0	0	0	0	0	0	0	0	0	0	1	0	0	1	0	0	0	0	0	0	0	0	0
OTU_765	0	1	1	0	0	0	0	1	2	0	0	2	0	1	0	0	0	0	0	0	0	0	0	0	0	2	1	0	0	0	1	0	0	0	0	0	0	0	0	0	0	1	0	0	0	0	0	0	3
OTU_881	0	1	0	2	1	0	0	2	1	0	0	1	0	0	0	0	2	0	0	0	0	0	0	0	0	0	0	0	0	0	0	0	0	1	0	0	0	0	0	0	0	0	0	0	0	0	0	0	0
OTU_2119	0	0	0	0	0	0	0	1	0	0	0	0	0	0	0	1	0	0	0	0	0	1	0	0	0	0	0	0	0	0	0	0	0	0	0	0	1	0	0	0	0	0	0	0	0	0	0	0	0
OTU_1391	0	2	0	0	0	0	0	0	1	1	0	0	0	2	0	0	0	0	0	0	0	0	0	0	2	1	1	0	0	0	0	0	0	0	0	0	0	0	0	0	0	0	0	0	0	0	0	0	1
OTU_1427	0	0	0	0	0	0	0	2	3	0	0	0	0	1	0	0	6	0	0	1	0	0	0	0	1	0	0	0	0	0	0	0	0	0	1	0	0	0	0	0	0	0	1	0	1	0	0	0	0
OTU_1703	0	0	2	2	0	0	1	1	1	0	1	1	1	0	2	1	3	2	0	1	2	1	0	1	3	2	1	2	3	0	0	0	0	0	2	1	0	4	3	3	1	0	0	0	1	1	0	2	1
OTU_1428	0	1	1	0	0	0	0	0	2	0	0	0	0	2	1	5	0	0	2	1	0	8	0	0	3	0	1	0	0	0	0	2	0	1	0	3	0	0	1	3	3	1	0	0	3	0	0	0	0
OTU_1082	0	0	0	0	0	2	0	0	0	0	0	0	0	0	0	0	0	0	0	0	0	0	0	1	1	0	0	0	0	0	0	0	0	1	0	0	0	1	0	1	0	1	0	1	0	0	0	0	0
OTU_1229	0	1	2	5	0	0	2	0	1	0	0	0	0	0	0	0	1	0	0	1	0	1	0	0	2	4	0	0	1	2	1	0	0	2	0	0	1	0	4	0	0	0	0	1	1	0	1	0	0
OTU_1482	0	2	0	0	0	0	0	3	0	0	0	0	4	1	0	0	0	0	0	0	0	0	0	0	1	0	0	0	0	2	0	0	0	0	1	1	0	2	0	0	0	0	0	0	1	0	1	0	0
OTU_1995	0	0	0	0	0	0	0	0	0	0	0	0	0	1	0	2	3	0	1	0	0	0	0	0	1	0	0	0	0	0	0	0	0	0	1	0	0	0	0	1	0	0	0	0	0	0	0	0	1
OTU_1922	1	1	0	1	0	0	2	2	3	0	0	1	0	1	0	1	0	0	0	0	0	0	1	1	0	0	1	0	0	1	0	0	0	0	0	0	1	0	0	0	0	0	0	0	0	1	1	0	0
OTU_2364	3	7	0	1	0	2	1	1	1	1	0	3	0	1	2	1	0	0	1	2	2	0	1	0	3	11	0	1	0	0	0	2	0	2	0	0	0	0	0	1	1	1	1	1	0	0	1	0	0
OTU_282	0	0	0	0	2	0	1	0	1	2	0	1	0	0	0	0	0	0	0	0	0	0	0	0	1	0	0	0	2	0	0	0	0	0	0	0	1	0	0	0	0	0	0	1	0	1	0	0	0
OTU_1795	0	0	0	0	0	0	0	0	1	0	1	1	0	0	0	0	0	0	0	0	0	0	0	0	0	1	0	0	0	0	0	0	0	0	0	0	0	0	0	0	0	0	0	0	0	0	0	0	0
OTU_432	0	0	1	0	5	1	0	0	1	0	1	0	1	1	0	3	1	0	0	0	1	0	0	0	1	0	0	0	0	0	0	0	0	0	0	0	1	0	0	1	1	0	1	0	3	4	0	4	0
OTU_425	2	3	2	1	0	1	1	1	1	1	0	4	0	2	3	0	1	0	0	0	0	0	1	2	0	4	0	1	1	0	0	3	1	0	0	0	1	0	1	0	0	0	0	5	0	0	1	1	0
OTU_1663	0	0	1	2	0	0	1	3	0	0	4	0	0	1	0	2	0	0	0	0	3	0	2	1	2	5	0	2	0	0	0	1	0	0	1	0	0	3	1	1	1	0	0	1	0	1	0	1	0
OTU_2330	0	2	0	0	0	0	0	0	0	0	0	0	0	1	0	0	0	0	0	0	0	1	0	0	0	0	0	0	0	0	0	0	0	0	0	0	0	0	0	0	0	0	0	0	0	0	0	0	0
OTU_1337	1	1	2	0	0	0	0	0	0	0	0	0	0	0	0	0	0	0	0	0	0	0	0	2	0	0	0	0	0	0	0	0	0	0	0	1	0	0	0	0	0	0	0	0	0	0	0	2	0
OTU_922	0	1	0	0	0	0	0	0	0	0	0	0	0	0	0	10	1	0	0	0	1	0	2	0	1	0	0	0	0	0	0	2	0	0	0	0	0	2	1	0	0	0	0	0	6	0	0	0	0
OTU_897	2	0	0	1	0	0	0	3	1	0	0	6	0	0	1	0	0	2	0	0	0	0	0	1	1	1	0	0	0	0	0	0	0	0	0	1	0	0	1	1	0	0	0	0	0	0	1	0	0
OTU_1079	0	0	0	3	0	0	0	0	0	0	0	0	0	0	0	0	0	0	1	0	0	0	0	0	0	0	0	0	0	0	0	0	1	1	0	0	0	0	0	3	0	0	0	0	0	0	0	0	0
OTU_1589	0	1	2	0	3	0	1	0	0	0	0	2	0	1	0	0	0	1	1	0	1	0	1	0	0	1	0	0	0	0	6	0	4	0	0	0	0	0	0	0	0	0	0	0	0	0	0	0	0
OTU_1731	1	2	1	0	0	0	0	0	1	0	0	0	1	0	0	0	1	0	0	0	0	0	0	0	1	0	2	0	0	0	0	0	0	0	0	0	0	0	0	1	0	0	0	0	0	0	0	0	1
OTU_485	0	0	2	0	0	1	0	0	0	4	0	1	1	1	1	3	0	0	0	0	1	2	1	1	1	0	2	1	0	1	0	0	2	0	1	0	0	0	0	0	1	0	1	0	0	0	1	3	1
OTU_1699	1	0	0	0	0	0	0	0	0	0	0	0	0	0	0	0	0	0	0	0	0	0	0	0	1	0	0	0	0	0	0	0	0	0	0	0	0	0	0	0	0	0	0	0	0	0	0	0	0
OTU_450	0	2	4	1	0	0	0	0	2	0	0	1	11	1	0	5	2	1	1	5	1	3	1	0	0	0	3	0	0	0	3	0	0	0	6	1	1	0	2	0	1	0	0	0	1	1	0	3	6
OTU_2027	0	1	0	8	1	0	0	1	0	3	0	0	0	0	0	0	0	0	0	0	0	0	0	0	1	0	0	0	0	0	0	0	0	1	0	0	0	0	0	0	0	0	0	0	1	0	0	0	0
OTU_1921	0	0	0	3	0	0	0	0	0	0	0	1	0	0	0	0	0	0	0	0	0	0	0	0	1	3	0	0	0	0	0	0	0	0	0	1	0	0	0	0	0	0	0	0	0	0	0	0	0
OTU_2449	0	0	0	1	0	0	0	0	0	0	0	0	0	0	0	0	0	0	0	0	0	0	0	0	0	0	0	0	0	0	0	0	0	0	0	0	0	0	0	0	0	1	0	0	0	0	0	0	0
OTU_1656	0	2	4	0	0	0	1	0	0	2	0	0	0	0	0	0	0	1	0	1	0	0	1	0	0	0	0	0	0	2	0	0	0	0	1	0	1	1	0	1	0	0	0	0	0	1	0	0	1
OTU_654	1	1	0	1	2	1	1	0	0	1	0	0	0	1	0	0	0	0	1	0	0	0	1	0	1	5	0	0	0	1	0	1	0	0	0	0	0	1	0	1	0	0	0	1	1	0	0	0	0
OTU_1152	0	1	1	1	0	1	1	0	1	0	0	0	0	0	0	1	0	0	0	1	0	0	0	0	0	1	0	1	2	1	1	0	0	2	0	2	5	1	0	0	0	0	0	1	0	0	0	1	0
OTU_907	0	0	0	5	0	0	0	0	0	0	1	0	0	0	0	0	0	0	0	0	0	0	0	0	2	0	0	1	0	0	0	0	0	0	0	0	0	2	0	0	0	0	0	1	0	1	0	0	0
OTU_2558	0	1	0	1	0	0	0	0	0	0	0	1	0	0	0	0	0	0	0	0	0	0	0	0	0	1	0	0	0	0	0	0	0	0	0	0	0	0	0	0	0	0	0	0	0	0	0	0	0
OTU_583	1	1	0	0	0	0	0	1	0	0	0	0	0	0	0	1	1	0	0	0	0	1	0	0	0	1	0	0	10	0	0	0	0	0	0	0	0	0	0	1	0	0	2	1	0	0	5	1	0
OTU_1984	0	0	1	1	0	1	0	0	0	0	0	0	0	0	0	1	0	0	0	2	3	0	0	0	0	1	1	0	2	1	0	2	0	0	1	0	0	2	1	1	0	0	0	0	0	0	0	1	0
OTU_1709	0	4	1	0	0	0	9	0	4	0	2	2	0	2	1	1	4	3	0	1	0	2	1	3	4	4	3	1	1	2	0	4	0	0	1	3	5	1	0	2	1	0	0	2	1	1	0	0	0
OTU_2028	0	0	0	0	0	0	0	0	0	0	0	0	0	0	1	0	0	0	0	0	0	0	0	0	0	0	0	0	0	0	0	0	0	0	0	0	0	0	0	0	0	0	0	0	0	0	0	0	0
OTU_409	1	2	2	0	1	0	0	3	0	0	1	0	2	0	0	1	0	0	0	1	0	0	0	0	2	4	0	1	0	2	1	0	2	0	1	1	4	1	0	0	1	0	1	1	0	0	0	0	1
OTU_2017	0	0	0	0	0	0	0	0	0	0	0	0	0	0	0	0	0	0	0	0	0	0	0	0	0	3	0	0	0	0	0	0	0	0	0	0	0	0	0	0	0	0	0	0	0	0	0	0	0
OTU_1936	0	0	0	0	0	0	0	0	0	0	0	2	1	0	0	0	0	0	0	0	0	0	0	0	0	0	0	0	0	3	0	0	0	1	0	1	0	0	0	2	0	0	0	0	1	0	0	0	0
OTU_2151	0	0	0	0	0	1	0	0	1	0	0	0	0	0	0	0	0	0	1	0	0	0	0	0	0	0	0	0	0	0	0	0	0	0	0	0	0	0	0	0	0	0	0	0	0	1	0	0	0
OTU_2553	0	0	0	0	0	0	0	0	0	0	0	0	0	1	0	0	0	0	0	0	0	0	0	1	0	0	0	0	0	0	0	0	0	0	0	1	0	0	0	0	0	0	0	1	0	1	0	0	0
OTU_1901	1	0	1	0	0	0	0	0	0	2	4	0	0	0	0	1	0	0	0	0	0	0	1	0	0	1	0	0	0	0	0	0	0	1	0	0	0	0	0	0	0	0	0	0	0	0	1	0	0
OTU_1155	0	1	0	1	1	5	1	0	0	0	0	6	0	0	0	0	0	1	0	0	0	0	0	1	1	1	0	0	0	3	0	0	0	0	0	0	0	1	0	0	0	1	0	1	1	0	0	0	0
OTU_2286	0	1	0	3	0	0	0	0	0	0	0	0	0	0	0	0	0	0	0	0	0	0	0	1	1	0	0	0	0	1	0	0	0	0	0	1	0	1	0	0	0	0	0	0	0	0	0	0	0
OTU_1159	0	1	0	1	0	6	0	1	0	0	0	1	1	1	0	0	0	0	0	0	0	0	1	0	0	0	0	0	0	2	1	0	0	0	0	1	1	0	0	1	0	3	0	0	0	0	0	0	1
OTU_1017	0	0	1	0	0	0	0	1	0	0	0	1	2	0	0	0	0	0	0	0	0	1	0	0	0	0	0	0	0	1	0	0	0	0	1	0	1	0	1	0	0	0	0	0	0	2	1	0	1
OTU_1504	0	1	1	3	0	0	0	1	0	1	0	1	0	0	1	0	0	0	0	1	0	0	0	0	0	0	1	1	0	1	1	1	0	0	1	0	2	0	0	1	0	0	0	0	0	0	0	0	2
OTU_1503	0	0	1	0	0	0	0	0	0	0	0	0	0	0	0	0	0	1	0	0	0	0	0	0	0	1	0	0	2	0	0	0	0	0	0	0	0	0	0	0	1	0	0	0	0	0	0	0	1
OTU_2528	1	1	5	7	0	1	0	0	0	1	0	7	0	3	0	1	0	0	0	0	0	0	0	3	0	3	0	3	0	3	0	0	0	0	0	1	0	2	0	0	0	0	0	0	0	0	0	0	2
OTU_1943	0	1	1	0	0	0	0	0	0	0	1	1	0	0	0	1	2	0	0	0	0	5	0	0	0	0	0	0	0	1	2	0	0	0	0	0	0	0	0	1	1	0	2	1	0	0	0	0	0
OTU_1037	1	0	1	2	1	1	0	3	2	0	0	0	1	0	0	0	0	1	0	1	0	0	1	0	0	1	1	3	0	0	0	0	1	0	0	0	1	1	0	0	1	0	0	0	1	2	1	0	0
OTU_1019	0	2	0	5	0	0	0	0	7	0	0	0	0	0	1	2	0	0	0	0	0	0	0	0	0	0	0	0	0	0	0	0	0	0	0	0	1	0	1	1	0	0	0	0	0	0	0	0	0
OTU_1803	0	5	0	0	0	3	0	2	0	0	0	1	0	0	0	1	0	4	1	0	0	0	2	0	0	0	1	1	1	1	0	0	1	0	0	0	1	0	0	0	0	2	2	0	0	2	0	0	0
OTU_1181	0	0	0	0	0	0	0	0	0	0	0	0	0	0	0	0	0	0	0	0	0	0	0	0	0	0	0	0	0	0	0	0	0	0	0	0	0	0	0	1	1	1	0	0	0	0	7	0	0
OTU_1224	0	0	0	0	0	2	0	0	1	0	0	0	3	1	0	0	0	0	0	0	0	0	0	0	0	0	0	0	0	0	0	0	0	0	0	0	0	0	0	0	0	0	0	0	2	0	0	0	0
OTU_1233	0	0	1	2	0	0	0	0	0	1	0	0	0	2	0	1	0	0	0	0	0	1	0	2	0	3	0	0	0	0	0	0	0	0	0	0	0	1	2	0	0	0	0	2	1	0	0	0	0
OTU_1176	0	0	0	0	0	0	0	0	0	0	0	1	2	0	0	0	0	0	0	1	0	2	0	1	0	0	0	0	0	0	0	0	0	0	0	0	2	0	0	0	3	1	0	0	0	0	0	0	0
OTU_887	0	4	4	0	0	0	0	3	0	0	2	0	5	0	0	2	0	1	1	0	4	4	0	0	0	0	0	0	3	0	1	0	2	0	0	1	0	0	0	2	1	0	3	0	1	0	0	3	1
OTU_601	0	0	2	0	0	0	1	0	1	0	0	0	0	0	0	1	0	3	0	0	0	0	1	0	0	1	0	0	0	0	0	2	0	0	3	1	0	0	1	0	2	0	0	0	1	0	0	0	0
OTU_1330	0	1	0	5	0	1	0	0	0	0	0	0	0	1	0	0	0	0	1	0	0	0	0	0	0	0	1	0	0	0	0	0	0	0	0	0	0	0	1	0	0	0	0	0	0	0	0	0	0
OTU_665	0	0	0	0	4	0	0	0	1	0	0	0	1	0	0	0	2	0	0	0	0	0	0	3	0	1	0	0	0	1	3	0	1	0	0	0	1	0	0	0	2	0	0	0	4	0	0	0	1
OTU_400	0	0	1	2	2	2	1	0	0	0	0	3	1	0	0	2	0	0	2	3	0	0	0	0	1	5	0	3	1	0	0	0	2	0	2	0	1	4	0	0	0	1	0	0	1	0	0	1	0
OTU_1025	0	1	0	0	0	0	0	0	0	0	0	1	0	0	0	1	1	1	0	0	0	3	0	0	1	0	0	2	0	0	0	0	0	0	0	0	0	0	0	1	0	0	0	0	0	0	0	0	1
OTU_2424	0	0	0	1	0	0	1	0	1	0	1	0	0	0	0	2	0	1	0	0	1	1	0	2	2	0	0	0	0	0	0	2	1	0	0	5	0	0	0	1	0	0	0	2	1	0	0	3	0
OTU_2176	1	1	1	1	0	0	0	0	2	0	0	0	0	1	0	6	2	0	0	0	0	0	0	0	1	1	0	1	0	0	0	0	0	0	0	0	0	0	0	1	0	0	0	0	0	0	0	1	0
OTU_1700	0	1	0	0	1	0	0	1	0	0	0	0	0	0	0	0	1	0	0	0	0	0	1	0	0	0	0	0	1	0	0	0	0	2	0	2	0	0	1	1	0	0	0	0	0	1	0	0	0
OTU_2024	0	0	0	0	0	0	0	2	0	0	0	0	0	0	0	0	0	0	0	0	0	1	0	0	0	0	0	0	0	0	0	0	0	0	0	0	0	0	1	0	1	0	0	0	0	1	0	0	0
OTU_484	0	1	1	0	3	2	4	0	3	2	1	1	0	10	0	1	0	0	0	0	1	0	2	3	3	1	0	2	1	1	2	1	0	0	0	1	1	7	0	1	1	0	1	2	0	0	0	1	1
OTU_753	0	0	0	0	1	0	1	0	0	0	1	0	0	0	0	0	1	0	1	1	0	0	0	0	0	0	1	0	0	0	1	0	0	0	0	0	0	0	0	0	1	0	7	0	0	0	0	0	0
OTU_1210	0	0	0	0	0	1	2	0	0	0	1	2	0	2	0	0	0	0	0	0	0	0	0	0	0	0	0	1	0	0	0	0	0	1	0	0	0	1	0	0	0	0	0	0	0	1	0	0	0
OTU_402	1	1	4	5	0	1	1	2	4	2	0	4	3	5	1	1	0	0	1	5	5	3	0	0	2	1	4	2	5	0	3	0	1	0	3	1	1	4	2	3	1	0	0	0	0	1	0	1	1
OTU_1652	0	0	0	0	0	1	0	1	0	0	0	1	0	0	1	0	0	0	0	0	0	0	0	0	0	0	0	0	3	0	0	0	0	0	0	0	0	0	0	0	0	0	0	0	0	0	0	0	0
OTU_971	1	1	0	0	0	1	1	0	2	0	1	0	0	1	0	1	1	1	0	0	0	1	4	0	3	0	1	2	2	0	0	0	2	1	0	0	0	0	3	2	0	1	0	0	2	0	0	1	0
OTU_1875	0	0	2	1	0	0	1	0	0	0	0	1	0	0	0	0	4	0	0	0	0	0	0	1	0	2	0	1	1	0	0	0	0	0	0	1	0	1	0	1	0	3	0	0	0	0	0	0	0
OTU_2430	0	1	0	0	0	0	0	0	0	0	0	0	0	0	0	0	0	0	0	0	0	0	14	1	2	2	0	1	0	0	0	2	0	4	0	1	1	0	0	1	2	0	0	1	1	1	1	0	0
OTU_2380	0	0	0	0	0	0	0	0	0	0	0	0	2	0	0	0	0	0	0	3	1	0	0	0	0	0	0	0	0	0	0	0	0	0	0	0	0	0	0	0	0	0	0	0	0	0	0	0	0
OTU_1246	0	0	2	0	0	0	0	0	1	0	0	0	0	1	0	7	0	0	1	0	0	1	2	0	0	0	0	0	0	0	0	0	0	0	1	0	0	0	0	0	1	0	0	0	0	0	0	0	3
OTU_1116	1	0	1	0	0	0	0	0	1	0	0	0	0	2	0	0	0	0	0	0	0	0	1	0	0	1	0	1	0	4	0	1	0	0	0	1	1	2	1	0	0	0	0	1	0	0	0	0	0
OTU_2047	0	0	0	1	1	1	0	0	0	0	0	0	0	0	0	0	0	0	0	0	0	0	0	0	0	0	0	0	0	0	0	0	0	0	0	0	0	2	0	0	0	0	0	0	0	0	0	0	1
OTU_1927	0	1	0	0	0	0	0	0	0	0	0	0	0	0	0	0	0	1	0	0	0	0	0	0	1	0	1	0	0	0	0	0	0	0	0	0	0	0	0	0	0	0	0	0	0	0	0	0	0
OTU_1792	0	0	0	1	0	0	0	0	0	0	0	1	0	0	0	0	0	0	0	0	0	0	0	0	1	1	0	0	0	0	0	0	0	0	0	0	0	0	0	0	0	0	0	0	0	0	0	0	0
OTU_1178	0	0	0	0	0	0	0	0	0	0	0	0	0	0	0	0	1	0	0	0	0	1	0	0	0	0	0	0	1	1	0	0	0	0	0	4	0	0	4	0	0	0	0	0	0	0	0	0	0
OTU_1258	0	1	0	0	0	0	0	1	0	0	0	0	0	0	0	1	2	0	0	0	0	1	0	0	0	0	1	0	1	0	0	0	0	0	2	0	0	0	0	0	0	0	1	0	0	0	0	8	1
OTU_1844	0	0	0	3	0	1	0	0	0	0	0	0	0	0	0	0	0	0	0	0	0	0	0	0	0	1	0	0	0	1	0	0	0	0	0	0	0	0	0	0	0	0	0	0	0	0	0	0	1
OTU_2547	0	1	0	0	0	0	0	0	0	0	2	0	0	1	0	0	0	0	1	0	0	0	0	0	0	0	0	0	1	1	0	0	1	0	0	0	1	0	0	0	0	0	0	0	0	0	0	3	0
OTU_1985	1	0	2	1	1	0	0	0	1	0	1	2	0	2	0	0	0	1	0	0	0	0	0	0	3	0	0	0	0	0	0	0	0	0	0	0	1	2	2	0	0	0	0	0	1	0	0	0	0
OTU_945	0	0	0	0	0	1	1	0	2	1	0	0	1	0	0	0	0	0	0	0	0	0	0	0	2	0	0	0	0	0	0	0	0	1	0	0	0	0	0	1	0	2	0	1	0	0	0	0	0
OTU_1060	2	0	1	0	0	2	0	0	0	3	0	1	0	0	0	0	0	1	0	0	1	2	1	0	1	2	0	0	1	2	0	0	0	1	0	2	1	0	0	0	0	0	0	1	0	0	0	0	0
OTU_1075	0	0	0	0	0	0	0	0	1	1	0	0	1	0	0	0	0	0	0	0	0	0	0	1	0	1	0	1	0	1	1	0	0	0	0	0	0	2	0	0	0	0	0	2	0	0	0	0	0
OTU_773	1	0	1	0	0	0	0	0	2	0	0	0	0	2	0	2	1	0	0	0	0	0	0	0	0	1	0	0	0	0	0	0	2	0	1	1	1	0	0	2	0	0	0	0	0	0	0	0	0
OTU_1982	0	0	1	0	0	1	0	0	1	0	0	0	0	0	0	0	0	0	0	0	0	0	0	0	0	0	0	0	0	0	1	0	0	0	0	0	0	0	0	0	1	0	0	0	0	0	0	0	1
OTU_2562	0	0	1	0	0	0	0	0	0	0	1	0	0	0	0	0	0	1	0	0	0	0	0	0	0	2	0	0	0	0	0	0	1	0	0	0	0	0	0	0	0	0	1	0	0	0	0	0	0
OTU_1934	1	0	2	1	0	0	0	0	0	0	0	0	1	0	0	0	0	0	1	0	0	0	0	0	0	2	0	1	0	0	1	0	1	0	0	1	0	0	0	0	0	0	0	1	0	0	0	1	0
OTU_387	0	0	3	1	1	2	1	7	0	4	0	1	0	0	1	1	0	0	0	0	1	0	0	0	2	0	0	2	0	2	1	1	4	3	1	0	0	2	3	0	1	1	0	2	1	0	0	0	0
OTU_1903	0	0	0	0	0	0	0	0	4	0	0	0	0	0	0	1	0	0	0	0	1	0	0	0	0	0	0	0	0	0	0	1	0	0	0	0	0	0	0	0	0	0	2	0	0	0	0	0	0
OTU_1727	0	0	0	1	0	0	0	0	0	0	0	0	0	1	1	0	2	0	0	0	0	0	0	0	1	0	0	0	0	0	1	0	0	0	0	0	0	0	0	0	0	0	1	0	1	0	0	0	0
OTU_1287	0	1	0	1	0	0	0	0	1	0	0	0	0	0	0	0	0	0	1	1	0	0	0	0	1	1	0	0	0	0	1	1	0	0	0	0	0	0	0	0	0	0	1	0	0	0	0	0	0
OTU_749	1	0	0	0	0	0	0	0	0	0	0	0	0	1	0	1	2	0	0	0	0	2	0	0	0	0	0	0	0	1	2	0	1	1	0	0	0	0	0	0	2	0	0	0	0	0	0	3	0
OTU_344	1	2	0	0	0	0	0	8	2	0	0	1	3	1	0	0	2	0	0	0	1	2	1	1	0	0	0	1	0	0	0	0	0	0	2	1	0	2	2	0	0	1	1	0	0	0	0	0	5
OTU_1737	0	0	0	1	0	0	0	0	0	1	0	0	0	1	1	0	0	0	0	1	0	0	0	1	0	0	0	0	0	0	0	0	0	0	0	0	0	0	0	1	0	1	0	0	0	0	0	0	1
OTU_1642	0	1	0	0	0	0	0	0	0	0	1	0	0	0	0	0	0	0	0	0	0	0	0	0	0	0	0	0	0	0	0	0	0	0	0	0	1	0	0	0	0	0	0	1	0	0	0	0	0
OTU_462	0	1	0	0	0	0	5	0	0	0	0	0	0	0	0	0	0	0	0	1	0	0	0	0	0	3	0	0	0	0	0	4	1	2	0	0	0	0	0	0	0	3	0	0	0	1	0	0	0
OTU_676	0	1	1	1	0	0	0	0	1	0	0	0	1	0	0	1	0	0	0	0	1	0	0	0	0	0	0	1	0	0	0	0	0	0	2	1	0	1	1	0	2	0	0	0	0	0	0	1	0
OTU_1660	0	0	0	1	1	0	0	0	0	0	0	0	1	1	0	0	1	0	0	1	0	0	0	0	0	0	1	0	1	3	0	0	0	0	0	0	0	0	0	1	0	0	0	0	0	0	0	0	0
OTU_1223	0	1	0	0	0	0	1	0	0	0	0	1	0	0	0	0	0	1	0	0	0	0	1	3	0	0	0	0	0	0	0	0	0	0	0	1	2	1	0	0	2	0	0	2	0	0	1	0	0
OTU_480	1	1	0	0	0	1	0	2	2	0	0	0	0	2	0	0	1	1	1	0	0	2	3	1	1	1	1	0	0	0	0	0	0	0	0	1	1	0	0	5	0	0	0	0	0	1	0	0	0
OTU_2421	0	0	1	0	0	0	0	0	0	0	0	0	0	0	0	0	0	0	0	0	0	0	0	0	2	0	0	0	0	0	0	0	0	2	0	1	0	0	1	0	0	0	0	0	0	0	0	0	0
OTU_2251	0	0	0	0	0	0	0	0	0	0	0	0	0	0	0	0	0	0	0	2	0	0	1	0	0	0	0	0	0	0	0	1	0	0	0	0	1	0	0	0	0	1	0	0	0	0	0	0	0
OTU_2542	0	0	0	0	0	0	0	0	0	0	0	0	3	0	0	0	0	0	0	0	1	0	0	0	0	3	0	0	0	0	0	0	0	0	0	0	0	0	0	0	0	0	0	0	0	0	0	0	0
OTU_706	0	1	0	0	0	0	0	0	0	0	0	0	1	2	0	0	0	0	1	0	0	1	3	0	0	0	0	0	0	1	0	1	0	0	1	0	0	1	0	0	0	0	1	0	0	0	0	0	0
OTU_2515	0	0	0	0	0	0	0	0	0	0	0	0	0	0	0	0	0	1	0	0	0	0	0	0	0	1	0	1	0	0	0	1	0	0	0	0	0	0	0	0	0	0	0	0	1	0	0	0	0
OTU_1372	0	1	0	1	0	0	6	0	1	0	0	0	0	0	0	0	0	0	0	0	0	1	0	0	0	0	0	0	0	0	0	0	0	0	0	0	0	0	0	0	0	0	0	0	0	0	1	1	1
OTU_857	0	0	0	0	0	0	1	1	2	0	0	0	0	0	0	1	2	0	0	0	0	2	0	0	0	0	1	0	3	0	0	0	0	0	0	0	0	1	0	1	0	1	0	3	0	1	0	0	1
OTU_2087	0	0	0	0	0	0	0	0	0	0	0	0	0	0	0	0	0	0	0	0	0	0	0	0	0	0	0	0	1	0	0	0	0	0	0	0	0	0	0	0	0	1	0	1	0	0	0	0	0
OTU_270	1	6	5	0	0	2	1	5	3	2	2	0	2	1	0	0	1	4	1	2	0	4	5	3	2	1	1	4	0	4	3	3	0	3	0	1	4	0	1	1	3	3	3	0	0	0	0	3	2
OTU_1256	0	0	0	0	0	0	1	0	0	0	0	0	1	0	0	0	0	0	0	2	0	0	0	0	0	6	0	0	0	0	0	0	0	0	0	0	0	1	0	0	0	0	0	0	0	0	0	0	0
OTU_1005	0	1	2	2	1	4	0	0	0	0	0	0	0	2	0	0	0	0	1	1	2	0	0	0	2	0	0	1	0	0	1	0	0	0	1	0	0	0	0	0	0	3	1	0	0	0	0	3	0
OTU_1571	0	0	0	0	0	0	0	0	0	0	1	0	0	0	0	0	0	0	0	0	0	0	0	0	0	0	0	0	0	0	1	0	0	0	0	0	0	0	1	1	0	1	0	1	0	0	0	0	0
OTU_1983	0	0	0	0	0	1	0	0	0	0	0	0	1	0	0	0	0	0	0	0	0	0	0	0	0	0	1	1	0	0	0	0	0	0	0	0	0	0	0	0	0	0	0	0	0	0	1	0	0
OTU_595	0	0	2	1	0	0	1	0	3	0	0	0	2	5	0	1	3	1	0	0	1	1	0	2	1	2	0	0	0	1	0	1	1	0	0	1	0	0	1	0	1	0	0	0	0	1	0	1	0
OTU_1445	0	0	0	0	1	0	0	0	0	0	0	0	0	1	1	0	0	0	0	0	0	0	0	0	0	0	1	0	0	0	0	0	0	0	0	0	0	0	1	0	0	0	0	0	0	1	0	0	1
OTU_727	2	2	9	0	2	1	0	2	4	1	0	2	5	1	0	1	0	4	2	9	1	5	1	0	0	3	0	0	0	2	2	0	0	0	4	5	2	0	3	0	0	0	0	1	0	1	2	1	2
OTU_658	1	0	0	0	0	1	0	0	2	0	0	0	0	0	0	0	0	0	0	0	0	0	0	0	13	0	0	0	0	0	0	0	0	0	0	0	0	0	0	0	0	0	0	1	0	0	0	0	0
OTU_2242	0	0	0	1	0	2	0	0	0	0	0	0	0	0	1	0	0	0	0	0	0	0	0	0	0	0	0	0	0	1	0	1	0	0	0	0	1	0	0	0	1	1	0	0	0	0	0	0	0
OTU_1148	2	1	0	0	2	0	1	1	0	0	0	1	1	3	0	3	1	0	0	0	0	1	1	0	1	2	0	0	3	0	1	3	0	0	0	0	0	1	0	1	0	0	0	0	0	0	0	0	0
OTU_2510	3	0	0	0	0	0	0	2	0	1	0	0	0	1	0	0	0	0	0	0	0	0	0	0	0	0	0	0	0	0	0	0	0	0	0	0	0	1	0	0	0	0	0	0	0	0	0	0	0
OTU_1552	0	0	0	1	0	1	2	1	0	0	0	0	0	0	0	0	0	0	0	0	0	0	0	0	0	0	0	0	0	0	0	0	0	0	0	2	0	0	0	0	0	0	0	1	0	1	0	0	3
OTU_1572	0	0	2	2	0	0	0	1	1	0	0	0	0	1	0	4	0	0	1	0	0	2	0	0	0	0	0	2	0	2	0	0	0	0	0	0	0	2	0	0	0	0	0	0	0	0	0	0	4
OTU_879	0	0	0	0	0	2	0	0	0	0	0	0	0	0	0	0	0	2	0	0	0	2	1	0	0	5	0	0	0	0	0	0	0	0	0	1	0	1	0	0	0	0	0	0	0	1	1	0	0
OTU_807	0	2	0	1	1	1	1	0	1	0	0	0	0	1	0	1	0	0	1	0	0	1	0	0	2	0	0	1	0	0	0	0	0	0	1	0	0	1	0	0	1	1	1	1	0	1	0	0	0
OTU_2373	1	0	0	0	0	0	0	0	0	0	0	0	0	0	0	0	0	0	0	0	0	0	0	0	1	0	0	0	0	0	0	0	0	0	0	0	0	0	0	0	0	0	0	0	0	0	0	0	0
OTU_1557	0	0	0	0	0	0	0	0	0	0	0	0	0	1	0	0	1	0	0	1	0	0	0	0	0	4	0	0	0	0	0	1	0	0	0	0	0	0	0	0	0	0	0	1	0	0	0	0	0
OTU_1378	0	0	0	2	0	0	0	0	0	0	0	0	0	0	0	0	0	0	0	0	0	0	0	0	2	0	0	0	0	0	0	0	0	0	1	0	0	2	0	0	0	0	0	1	1	0	0	0	0
OTU_2168	0	1	0	2	0	0	1	0	0	0	1	0	1	0	3	1	1	0	0	0	2	2	3	1	0	0	0	0	0	0	1	1	1	1	0	0	0	0	0	0	1	0	1	0	1	0	1	1	0
OTU_898	0	0	1	1	0	2	0	0	0	0	3	1	0	0	1	0	0	1	0	0	0	0	0	0	2	0	0	1	0	0	0	0	0	0	0	0	0	0	1	0	0	1	0	0	0	0	0	0	0
OTU_1593	0	5	0	0	0	0	0	0	0	0	0	0	0	0	0	0	0	0	0	0	0	0	0	0	0	0	0	0	0	0	0	0	0	0	0	0	0	0	0	0	0	0	0	0	0	0	0	0	0
OTU_1212	0	1	0	2	1	0	1	0	0	0	1	0	0	1	0	0	0	1	0	0	0	0	0	0	1	0	0	1	0	0	0	0	0	1	0	1	1	0	0	0	1	1	0	0	0	1	0	0	2
OTU_713	0	5	2	0	0	6	0	0	0	1	0	2	1	1	1	1	0	0	0	0	0	0	1	0	1	1	1	2	0	0	0	0	0	0	0	0	3	3	0	1	0	1	0	2	1	0	0	0	1
OTU_2100	0	0	0	0	0	0	0	0	0	0	0	0	0	0	0	0	0	0	0	0	0	0	0	0	0	0	0	0	0	0	0	0	0	0	0	0	0	0	0	0	0	1	0	0	0	0	0	0	0
OTU_1309	0	0	0	1	0	1	0	0	0	0	0	0	0	0	0	0	0	0	0	0	0	0	0	0	1	0	0	0	0	0	0	0	0	0	0	0	0	0	0	1	0	0	0	0	0	0	0	0	0
OTU_830	0	0	0	1	2	0	1	0	0	0	1	0	0	0	0	0	0	2	0	0	0	0	0	0	1	0	0	0	1	0	0	0	0	1	0	0	2	0	0	0	1	2	0	1	0	0	0	0	0
OTU_873	1	0	0	2	0	0	0	1	2	0	0	0	0	3	0	0	1	2	1	0	2	2	1	0	1	2	0	0	1	1	0	0	0	1	0	1	1	0	1	0	1	2	0	0	0	2	0	0	2
OTU_1644	0	0	0	1	0	0	0	0	0	0	0	0	0	0	0	0	0	0	0	0	0	1	0	0	1	0	0	0	0	0	0	0	0	0	0	1	0	0	0	0	0	0	0	0	0	0	0	0	1
OTU_2534	0	0	0	1	0	0	0	0	0	0	0	0	0	0	0	0	0	0	0	0	0	0	0	0	0	0	0	0	0	0	0	0	0	0	0	0	0	0	0	0	0	0	0	0	0	0	0	0	0
OTU_607	0	1	0	0	2	0	0	0	0	0	0	1	1	0	0	0	0	0	0	1	1	0	1	2	1	2	0	0	2	0	0	1	0	0	0	0	0	0	0	0	0	0	0	1	0	0	0	0	0
OTU_1527	0	0	0	2	0	0	0	0	0	0	0	0	0	0	0	0	0	0	0	0	0	0	0	0	1	1	0	0	0	0	0	0	0	0	0	0	0	0	0	0	0	0	0	0	0	0	0	0	0
OTU_669	1	1	0	0	0	0	0	1	1	0	0	0	1	0	0	3	0	0	2	0	0	0	1	0	1	1	0	0	0	0	0	0	0	0	0	1	0	1	1	1	0	0	0	0	0	1	0	2	1
OTU_779	0	1	0	1	0	0	1	0	1	0	0	0	0	0	0	2	1	3	0	1	0	0	0	0	0	3	0	0	0	0	0	0	0	0	0	0	0	0	1	1	0	0	0	0	2	0	0	0	0
OTU_1381	0	0	0	0	0	0	0	1	1	0	0	0	0	0	0	0	0	0	0	0	0	0	0	0	0	0	0	1	0	0	0	0	0	0	0	0	1	0	1	0	2	0	0	0	0	0	0	0	0
OTU_1906	0	0	0	0	0	0	0	0	0	0	0	0	0	0	0	0	0	1	0	0	0	0	1	0	0	0	0	0	0	0	0	0	0	2	0	1	0	0	0	0	0	0	0	0	0	0	0	0	0
OTU_861	0	0	0	2	0	1	3	0	0	0	0	1	0	0	0	0	0	0	0	0	0	0	0	0	1	1	0	0	0	0	0	0	0	0	0	0	0	9	0	0	0	0	0	0	0	0	0	0	0
OTU_1386	1	1	1	2	0	0	2	2	0	1	0	0	0	0	0	1	0	1	0	0	0	1	0	0	1	0	1	1	0	1	0	1	0	0	0	0	0	0	1	0	2	0	0	1	0	0	0	1	0
OTU_985	0	0	0	1	0	0	0	0	0	0	1	0	0	0	0	0	0	0	0	0	0	0	0	0	0	1	0	0	0	0	0	0	0	0	0	0	0	0	0	0	0	0	0	0	0	0	0	0	0
OTU_1000	0	0	1	0	0	0	0	0	0	0	0	0	2	0	0	0	0	0	0	0	0	0	0	0	1	0	1	0	0	1	0	0	0	0	1	0	0	0	0	0	0	0	0	0	0	0	0	1	0
OTU_1211	1	0	1	0	1	0	0	2	0	0	0	0	1	0	0	0	0	0	0	0	0	0	0	0	0	1	0	2	0	3	0	0	0	2	0	0	1	1	0	1	1	0	1	1	0	0	0	0	1
OTU_2429	0	0	0	0	1	0	0	0	1	0	0	0	0	0	0	0	0	0	0	0	0	0	0	0	0	0	0	0	0	0	1	0	0	0	0	1	0	0	2	0	0	0	1	0	0	0	0	0	0
OTU_593	0	0	0	0	0	2	0	0	0	1	0	1	0	0	0	1	0	0	1	0	0	0	0	1	0	1	0	1	2	0	0	0	0	0	0	0	0	0	0	0	0	0	0	0	0	0	0	1	5
OTU_1876	0	0	0	0	0	2	0	0	0	0	0	0	0	0	0	0	0	0	0	0	1	0	2	1	0	1	0	2	0	0	0	0	0	0	0	0	0	1	0	0	0	0	0	0	0	0	0	0	0
OTU_2051	0	2	1	0	0	0	0	0	0	0	0	0	0	0	0	1	0	0	0	0	0	0	0	0	0	0	0	1	0	1	0	0	1	0	0	0	0	0	0	2	3	0	0	0	0	0	1	0	0
OTU_1972	0	0	1	0	0	0	0	0	0	0	0	1	2	1	4	0	1	0	0	0	0	0	2	0	0	2	0	1	0	1	0	1	0	3	0	0	0	0	0	0	0	3	1	0	1	0	0	0	0
OTU_1058	0	0	0	0	0	0	0	0	0	0	0	0	0	0	0	0	0	0	0	0	0	0	0	0	0	0	0	0	0	0	0	0	0	5	0	0	0	0	0	0	0	0	0	0	0	0	0	0	0
OTU_1797	0	0	2	0	0	0	0	0	0	0	0	1	3	0	0	0	0	0	0	1	0	0	0	0	0	0	0	0	0	0	0	0	0	0	2	0	0	0	0	1	0	0	0	0	0	0	0	0	2
OTU_689	0	1	0	0	0	0	0	0	2	0	0	2	0	1	0	0	0	0	0	0	0	1	0	0	0	0	1	1	0	0	0	0	0	0	0	1	3	0	0	0	0	0	0	0	0	0	1	0	0
OTU_2003	0	0	1	1	0	0	0	0	0	0	0	0	0	0	1	0	1	0	0	0	0	0	0	0	0	0	2	0	0	1	0	0	0	3	0	0	0	0	1	0	0	0	0	0	1	0	2	0	0
OTU_1674	4	0	2	0	1	0	0	0	1	0	0	0	0	1	0	0	0	0	0	0	0	0	0	0	0	0	0	0	0	0	1	0	1	0	0	0	0	1	0	0	0	0	0	0	1	0	0	1	1
OTU_1449	0	0	0	1	0	0	1	0	0	0	0	1	0	0	0	0	0	0	0	0	0	0	0	0	0	0	0	0	0	0	0	0	0	0	0	0	0	0	0	0	0	0	0	0	0	0	0	0	0
OTU_1031	1	0	0	0	1	0	0	0	0	0	0	0	0	0	0	0	0	0	0	0	0	2	0	0	0	3	0	0	0	0	0	0	0	0	0	0	0	0	1	0	1	0	0	0	1	0	0	0	0
OTU_2300	0	0	0	0	0	1	0	1	0	1	0	4	0	0	0	0	1	0	0	0	0	0	0	0	0	1	2	0	0	0	0	0	0	2	0	0	0	0	0	0	0	0	0	0	2	2	0	0	0
OTU_1294	0	0	0	0	0	0	0	0	0	0	0	0	0	0	0	0	0	0	0	0	0	0	0	0	0	0	1	0	0	0	0	0	0	0	0	0	0	0	0	0	0	0	0	0	0	0	0	0	0
OTU_1244	1	1	0	0	0	0	0	0	0	0	0	1	0	2	0	2	1	0	0	2	0	1	0	0	0	1	1	0	0	1	1	1	0	0	3	0	0	0	0	1	0	0	1	0	0	0	0	0	0
OTU_1234	0	0	0	0	0	0	2	1	0	0	0	0	0	3	0	0	0	0	0	1	0	0	0	0	1	1	2	0	0	1	0	0	0	0	0	0	0	0	0	0	0	0	0	0	1	1	0	0	0
OTU_1627	0	0	2	0	0	0	0	0	0	0	0	0	0	0	0	0	0	0	0	0	0	0	0	0	0	1	0	1	0	0	0	0	0	0	1	0	0	0	0	0	0	0	1	0	0	0	0	0	0
OTU_1812	0	0	0	0	0	0	0	0	0	0	0	0	0	1	0	0	0	0	0	0	0	0	1	0	0	0	0	1	0	0	0	0	0	0	0	0	0	0	0	2	5	0	0	0	0	0	0	0	0
OTU_1839	1	2	0	0	0	1	0	0	0	0	0	0	0	0	0	0	0	0	0	0	0	0	0	0	0	1	0	0	0	0	0	0	0	0	0	0	0	0	0	0	0	0	0	1	0	1	0	0	0
OTU_1095	0	1	1	0	1	1	0	1	1	1	1	2	0	0	0	0	0	0	0	0	0	0	0	1	0	2	0	1	1	0	0	0	1	0	0	2	0	0	0	0	0	0	1	2	0	1	0	0	0
OTU_716	5	2	0	0	0	0	0	0	2	0	0	0	0	1	0	0	0	0	0	0	0	1	0	2	0	0	0	0	0	0	0	1	0	0	0	0	0	0	1	0	0	1	0	2	0	0	0	0	0
OTU_594	0	0	0	2	0	1	0	0	1	0	0	0	0	0	1	0	0	2	0	0	0	0	0	0	0	0	0	5	0	0	1	0	0	0	1	0	3	0	0	0	1	0	0	0	0	0	0	0	1
OTU_2166	0	0	0	0	0	0	0	0	0	0	1	3	0	0	0	0	0	0	1	0	1	0	0	0	1	2	1	0	0	0	0	1	5	0	0	1	1	0	0	1	1	0	0	2	0	0	0	0	0
OTU_1767	0	1	0	3	0	0	0	0	0	0	0	1	0	0	0	0	0	0	0	0	0	0	0	1	0	0	0	0	0	0	0	1	0	0	0	0	0	2	0	0	0	0	0	0	0	1	0	0	0
OTU_1957	0	0	0	0	0	0	0	0	0	0	0	1	0	0	0	0	0	4	0	0	0	0	0	0	0	0	0	0	0	0	0	0	1	0	0	0	0	0	0	1	0	0	2	0	0	0	0	0	1
OTU_1190	0	0	0	0	0	0	0	0	0	0	0	0	0	3	0	1	0	0	0	0	0	0	0	0	0	7	0	0	0	1	0	0	0	0	0	0	0	0	0	0	2	0	0	0	0	1	0	1	0
OTU_784	0	1	0	3	0	2	0	0	0	0	0	1	0	0	0	1	0	1	0	0	0	0	0	0	1	0	0	0	0	0	0	0	0	0	0	0	0	1	2	0	0	0	0	1	0	0	0	0	0
OTU_1290	0	0	0	1	0	0	1	0	0	0	0	0	0	0	0	1	0	0	0	0	0	0	0	0	4	0	0	0	0	0	0	0	0	0	0	0	0	0	0	0	1	0	0	0	0	0	0	0	0
OTU_733	0	1	0	1	0	0	0	0	1	1	0	1	0	0	2	0	0	0	1	2	1	0	2	1	0	1	0	0	0	0	2	0	1	1	1	0	0	3	0	0	0	0	0	0	0	0	1	0	0
OTU_1253	0	0	0	0	0	0	0	0	0	0	1	0	0	0	1	2	0	0	0	0	0	0	0	0	1	0	0	0	0	0	0	0	0	1	0	0	0	1	0	0	0	0	0	0	0	0	1	0	0
OTU_2138	0	0	0	0	0	0	0	1	0	1	0	0	0	0	0	0	0	0	0	1	0	0	0	0	0	0	0	0	0	0	0	0	0	0	0	0	0	0	2	0	0	0	0	0	0	0	1	0	0
OTU_584	1	2	0	0	0	0	0	1	1	0	0	1	1	1	0	3	0	0	1	0	3	3	0	1	0	0	0	0	1	0	6	0	1	0	2	0	1	0	2	2	0	0	0	0	1	0	0	0	0
OTU_1993	0	0	0	0	0	0	1	0	0	1	0	0	0	0	0	0	0	0	0	0	0	0	0	0	0	1	0	0	0	0	0	0	0	0	0	0	0	0	0	0	0	0	0	0	1	0	0	0	0
OTU_813	1	0	0	0	0	0	1	0	0	0	0	3	0	1	0	0	0	0	1	0	0	0	1	0	0	1	0	1	0	0	0	1	0	1	0	0	0	0	0	0	0	0	0	0	0	0	0	0	0
OTU_1189	0	0	0	0	0	1	0	0	0	0	0	0	0	0	0	0	0	0	0	0	0	0	0	0	0	0	0	0	0	0	0	0	0	3	1	0	0	1	0	0	0	1	0	0	0	0	0	0	0
OTU_790	0	1	0	0	0	0	0	2	0	0	4	1	1	0	0	0	1	1	0	0	0	0	0	0	2	0	0	0	0	0	0	0	0	0	1	0	0	2	0	0	0	0	0	0	0	1	0	2	0
OTU_1603	1	1	0	1	0	0	0	0	0	0	0	1	0	2	1	0	2	0	0	0	0	0	0	0	0	0	1	1	0	0	1	0	0	1	0	2	2	0	0	1	0	0	0	0	1	0	0	0	2
OTU_1069	1	1	0	1	0	0	0	0	0	1	0	0	1	0	0	0	1	0	0	0	0	0	0	0	1	1	1	0	0	0	0	0	0	1	0	0	0	0	0	1	0	0	0	1	0	1	0	0	0
OTU_1787	0	1	1	0	0	0	0	0	0	0	0	0	0	0	0	0	0	0	0	0	0	0	0	0	0	1	1	0	0	0	2	0	1	0	0	0	0	0	1	0	0	0	1	0	0	0	1	2	0
OTU_1396	0	0	0	0	1	4	0	1	0	2	2	0	0	0	0	1	2	2	4	1	0	0	1	2	3	0	0	0	3	2	1	0	0	0	0	0	0	0	3	2	1	0	0	0	0	1	0	0	1
OTU_1444	0	0	0	0	1	3	0	0	0	0	0	0	1	0	0	0	0	0	0	0	0	0	0	0	0	0	0	0	0	0	0	0	0	0	0	0	1	0	0	0	0	0	0	0	0	0	0	0	0
OTU_1084	0	0	1	0	0	1	0	0	2	0	0	0	0	4	0	1	1	0	0	0	0	4	0	0	0	0	1	0	1	0	0	0	0	0	0	0	0	1	0	0	0	0	0	0	0	0	0	0	1
OTU_547	1	0	0	1	0	0	1	0	1	0	0	6	1	1	1	2	0	0	0	0	0	0	0	2	1	2	1	2	0	0	0	1	1	0	0	0	0	0	0	0	1	0	0	1	0	0	1	1	0
OTU_1059	0	0	1	0	0	1	0	1	0	1	0	3	1	1	0	1	0	0	0	0	0	0	0	0	0	0	1	1	3	0	3	0	1	0	2	3	0	0	0	0	1	0	5	0	1	2	0	0	0
OTU_1408	0	0	0	0	0	0	2	0	0	1	0	0	0	0	1	0	0	0	0	0	0	0	1	0	0	0	0	1	0	1	0	0	0	0	0	0	0	0	0	0	0	0	0	0	0	0	0	0	0
OTU_890	1	0	0	0	0	1	0	0	0	0	0	0	10	0	0	0	2	0	0	0	0	7	1	0	1	0	2	1	2	0	2	0	0	2	2	0	0	0	0	0	1	0	0	0	0	0	1	0	1
OTU_482	0	1	1	0	0	1	1	1	2	3	2	1	0	1	0	1	1	0	0	1	2	0	1	0	1	1	1	0	0	1	1	0	1	1	0	0	1	0	0	2	0	0	0	1	0	1	0	1	1
OTU_1649	1	1	2	0	0	0	0	1	0	2	0	0	0	0	0	1	0	0	0	0	1	1	0	1	0	0	1	0	0	0	0	0	1	0	0	1	0	0	0	0	0	1	0	0	0	0	1	0	0
OTU_994	1	0	4	0	0	1	0	0	0	0	0	0	0	0	0	0	0	1	1	1	0	0	0	0	1	0	0	1	0	0	0	0	0	0	0	0	1	0	0	0	0	1	0	0	0	0	0	0	1
OTU_791	0	2	0	2	0	0	0	1	0	0	0	1	1	0	0	0	0	0	1	0	0	0	0	1	2	3	0	0	1	0	0	0	1	1	0	0	4	4	0	0	1	1	0	2	5	1	0	0	8
OTU_1063	0	2	1	1	0	0	2	1	1	0	2	1	0	1	0	1	3	2	0	0	0	1	0	0	1	2	0	1	1	3	0	0	0	0	1	0	0	0	0	1	0	0	0	0	0	1	1	2	0
OTU_2107	0	0	0	0	0	2	0	0	0	0	0	0	0	0	0	0	1	0	1	0	0	2	0	0	0	0	0	0	0	0	0	0	1	0	0	0	0	0	0	0	0	0	0	0	0	0	0	0	0
OTU_1220	0	1	1	0	0	0	1	0	0	0	1	1	0	0	0	0	0	0	0	0	0	0	0	0	2	0	0	1	0	1	0	0	0	0	0	0	0	1	0	1	0	0	0	0	1	0	0	0	0
OTU_1600	0	2	1	0	0	0	0	0	0	0	0	0	1	0	0	0	0	0	0	0	0	0	0	0	0	0	0	0	1	0	0	0	0	0	0	0	0	0	0	0	0	0	1	0	0	0	0	0	0
OTU_731	0	2	1	0	0	1	1	0	1	2	0	1	0	1	0	3	0	1	0	1	0	0	0	0	0	2	0	2	0	0	2	0	1	0	1	0	2	1	0	1	0	0	0	1	0	0	0	1	4
OTU_2521	1	1	0	0	0	0	0	0	0	0	0	0	0	2	0	0	0	0	0	0	0	1	0	0	0	1	0	0	0	0	0	0	0	0	0	0	0	0	0	0	0	0	0	0	0	1	0	0	0
OTU_357	0	0	2	1	0	2	1	1	3	1	3	0	1	2	0	1	1	1	0	3	0	1	0	1	2	1	0	0	0	2	1	0	2	0	0	3	2	2	1	1	0	0	0	0	1	1	0	1	0
OTU_1087	0	0	0	0	1	0	0	0	0	0	0	0	0	2	0	1	0	0	1	0	0	0	0	0	0	3	2	0	0	0	0	0	0	0	0	0	0	0	0	0	0	0	0	0	0	1	0	1	0
OTU_1534	0	3	0	0	0	0	0	0	0	0	0	0	0	0	0	0	0	0	0	0	0	0	0	0	0	0	0	0	0	0	0	0	1	0	0	0	0	0	0	0	0	0	0	0	0	0	0	0	0
OTU_943	0	0	0	0	0	0	0	1	0	0	0	0	2	1	2	0	0	0	0	0	0	0	0	1	0	0	0	0	0	0	0	0	2	0	3	0	1	0	0	1	3	0	1	0	0	0	0	3	0
OTU_2226	0	0	0	0	0	0	0	0	0	0	0	0	0	0	0	0	0	0	0	1	0	0	0	0	0	0	0	0	0	0	0	0	0	0	0	0	0	0	0	0	0	0	0	0	0	0	0	2	0
OTU_1366	0	1	3	0	0	0	0	0	1	0	0	0	1	1	1	0	2	0	0	0	0	3	0	0	0	0	1	0	0	0	0	0	0	0	2	0	0	0	0	0	0	0	0	0	0	0	0	0	6
OTU_2466	0	0	0	0	0	0	0	0	0	0	0	1	0	1	0	0	0	0	0	0	0	0	0	0	0	0	0	0	0	0	0	0	0	0	0	0	0	0	0	0	0	0	0	0	0	0	0	0	0
OTU_1769	0	0	0	0	0	0	1	0	0	0	0	0	0	0	1	0	0	0	0	0	0	0	0	0	0	0	0	0	0	0	0	1	0	0	0	0	0	0	0	0	0	0	0	0	0	0	0	0	2
OTU_751	0	0	18	0	0	0	1	0	0	1	0	0	0	0	1	0	0	1	0	1	0	2	1	0	1	2	0	1	1	1	0	2	0	0	0	0	0	1	2	0	0	0	1	0	0	0	0	0	0
OTU_970	0	0	0	0	0	0	0	0	0	0	8	0	0	0	0	0	0	0	0	0	0	0	0	0	0	0	0	0	0	1	0	1	1	0	0	0	0	0	0	0	0	0	0	0	0	0	1	0	0
OTU_1292	4	0	0	1	2	1	0	0	0	1	1	0	4	1	1	0	1	0	0	0	0	0	0	0	2	1	0	3	0	0	0	0	3	2	1	2	0	0	1	0	3	0	0	1	3	0	0	0	0
OTU_1039	0	0	0	0	1	0	0	0	1	1	4	0	0	1	0	0	0	2	0	0	1	0	0	0	0	2	0	1	0	2	0	2	0	0	1	0	1	0	5	1	2	0	0	0	0	0	0	1	0
OTU_1198	0	2	0	7	0	0	0	0	0	0	0	1	0	0	0	0	0	0	0	0	0	0	0	0	2	2	0	0	0	0	1	0	0	0	0	0	0	1	0	0	1	1	0	0	1	0	0	0	0
OTU_1259	0	2	0	0	0	0	0	0	0	0	0	0	0	0	0	0	1	0	1	0	0	0	0	0	0	0	2	0	0	0	0	0	0	0	1	1	0	0	0	0	0	0	0	0	0	0	0	0	1
OTU_795	0	0	0	1	0	0	0	1	0	0	1	0	0	0	0	0	0	0	0	0	0	0	1	1	2	0	0	0	0	0	0	0	1	0	1	0	2	0	2	0	1	0	0	0	0	0	0	1	0
OTU_1615	0	0	1	0	0	0	0	2	0	0	0	0	1	0	0	0	0	0	0	0	0	0	0	0	0	0	1	0	0	0	0	1	0	0	1	0	0	0	0	0	0	0	0	0	0	0	0	0	0
OTU_2375	0	0	0	0	0	0	0	0	0	0	0	3	0	0	0	0	0	0	0	0	0	0	0	0	0	0	0	0	0	0	0	0	0	0	1	0	0	0	0	0	0	0	0	0	0	0	0	0	0
OTU_369	0	5	2	0	0	0	0	1	0	0	0	0	1	0	0	6	4	0	1	4	1	1	0	0	0	0	0	1	0	0	1	0	2	0	0	0	0	0	0	0	0	0	3	0	0	1	0	5	4
OTU_1205	0	0	0	1	0	0	0	0	0	0	0	1	0	0	0	0	0	0	0	0	0	0	0	0	1	0	0	0	0	0	0	0	0	0	0	0	0	0	0	0	0	0	0	0	0	0	0	0	0
OTU_880	0	0	2	1	0	2	0	1	0	1	1	3	0	1	0	0	0	1	1	1	0	0	1	0	0	4	0	1	2	0	0	0	0	2	0	0	0	3	0	0	1	0	1	1	1	0	1	0	0
OTU_1834	0	1	0	0	0	0	0	0	0	0	0	1	0	1	0	1	0	0	0	0	0	0	0	0	0	0	1	0	1	0	0	0	0	0	0	0	0	0	2	0	0	0	0	0	2	0	0	0	0
OTU_1537	0	1	0	0	0	0	0	0	0	0	0	0	2	0	0	0	0	0	0	0	0	1	0	0	0	0	1	0	0	0	0	0	0	0	0	0	0	0	0	0	1	0	1	0	0	0	0	0	0
OTU_2004	0	0	0	0	0	0	0	0	0	0	0	0	0	1	0	0	0	0	0	0	0	0	0	0	0	0	0	0	0	0	0	0	0	0	0	0	0	0	0	0	0	0	1	0	0	1	0	0	0
OTU_1269	0	2	1	0	0	0	1	1	0	0	0	0	0	1	0	1	0	0	0	0	0	0	0	0	0	1	0	0	0	0	0	0	0	0	0	1	0	0	0	0	0	0	1	0	4	0	0	0	1
OTU_1447	0	2	0	0	0	0	0	1	0	0	0	0	0	0	0	0	0	0	0	0	2	0	0	0	0	0	0	0	0	4	0	0	1	0	0	0	0	0	0	0	0	0	0	0	0	0	0	0	0
OTU_806	0	0	0	0	3	0	0	0	0	0	0	0	0	1	0	0	0	0	0	0	0	0	0	1	0	2	0	0	0	1	0	0	0	0	0	1	0	0	1	0	1	0	0	0	0	0	0	3	1
OTU_780	0	0	2	0	1	0	0	1	0	0	0	1	0	0	0	2	0	0	5	0	0	0	1	0	0	0	0	0	0	1	0	0	0	0	0	0	1	0	0	0	0	0	0	0	0	0	0	0	0
OTU_475	1	1	4	0	0	1	0	2	3	0	0	2	0	0	0	2	1	0	3	0	0	3	0	0	0	3	2	3	0	0	0	0	0	0	0	0	0	0	0	0	0	0	0	0	0	0	0	0	7
OTU_1194	0	0	1	0	1	0	0	0	0	0	0	0	0	0	0	2	0	0	0	0	0	0	0	0	1	0	0	1	0	0	0	0	0	0	0	0	0	0	2	1	0	0	0	0	0	0	0	1	0
OTU_1692	0	2	0	0	0	0	0	0	0	0	0	0	0	1	0	0	0	0	0	0	0	0	0	0	0	0	0	0	0	0	0	0	0	0	0	0	0	0	0	0	0	0	0	0	0	0	0	0	2
OTU_2334	1	2	8	0	0	1	0	1	0	0	0	0	2	0	0	8	3	0	11	2	2	10	0	0	0	1	0	0	0	2	2	0	1	0	3	0	0	0	0	0	2	1	2	0	0	1	0	2	10
OTU_2070	0	0	0	0	0	0	0	0	0	0	0	0	0	1	0	0	0	0	3	0	0	0	0	0	0	0	0	0	0	0	0	0	0	0	0	0	0	0	0	0	0	0	0	0	0	0	0	0	0
OTU_1800	0	0	0	0	0	0	0	0	2	0	0	0	0	0	0	0	0	0	0	1	0	0	0	0	0	0	0	0	0	0	0	0	1	0	1	0	0	0	0	0	0	0	0	0	0	0	0	0	0
OTU_723	0	1	2	0	0	0	1	1	0	0	0	0	1	0	0	2	1	0	0	0	3	0	1	0	0	2	3	1	0	1	1	0	1	0	0	0	2	0	0	0	0	0	0	2	1	0	0	0	0
OTU_2180	0	0	0	0	0	0	0	0	0	0	0	0	0	0	0	0	0	0	0	0	0	0	0	0	0	1	0	0	0	0	0	0	0	0	0	0	0	0	0	0	0	0	0	0	0	0	0	0	0
OTU_1804	0	2	0	0	0	0	0	2	3	0	0	0	1	0	0	0	0	0	0	0	0	0	0	0	0	0	0	0	0	0	1	0	1	0	2	0	0	0	1	0	0	0	0	0	0	0	0	1	0
OTU_1645	0	0	1	1	0	0	0	0	0	0	0	0	0	0	0	3	0	0	0	0	0	0	0	0	0	0	1	1	1	0	0	0	0	0	0	0	2	0	0	0	0	0	0	0	0	0	0	0	4
OTU_1516	0	1	0	0	0	0	0	0	0	0	0	1	0	0	0	0	0	0	0	0	0	0	0	0	0	0	0	1	0	0	0	0	0	0	0	0	0	0	0	0	0	0	0	0	0	0	0	0	0
OTU_1001	0	4	0	0	0	0	1	0	1	1	0	0	0	0	0	0	0	0	0	0	0	0	0	0	0	1	0	0	0	0	0	0	0	0	0	0	0	0	0	0	0	0	0	0	0	1	1	0	0
OTU_2492	0	0	0	0	1	0	3	0	0	0	0	0	0	0	0	1	0	0	0	0	0	0	0	0	0	0	0	0	0	1	0	0	2	0	0	0	0	0	1	0	1	0	0	0	0	0	0	1	0
OTU_1519	0	0	0	0	0	0	1	0	0	0	0	0	0	0	0	0	0	0	0	0	0	0	0	0	0	1	0	0	0	0	0	0	0	0	0	5	0	0	0	0	1	0	1	0	0	0	0	0	0
OTU_899	0	0	0	0	0	3	5	0	0	0	0	2	0	0	0	0	0	0	0	1	0	0	0	1	1	2	1	2	0	0	1	0	0	0	0	0	2	0	0	0	0	0	0	0	2	1	0	0	0
OTU_841	0	2	0	6	0	0	1	0	0	1	1	0	2	1	0	0	2	2	0	0	0	0	0	0	0	2	0	2	1	0	0	0	1	0	4	0	0	1	0	0	2	0	1	2	0	0	0	0	0
OTU_755	0	0	1	2	0	0	0	0	0	0	0	0	0	0	0	0	0	0	0	0	0	2	2	0	1	1	0	3	1	0	1	0	0	0	0	0	0	0	0	0	0	0	0	0	0	0	0	0	0
OTU_1597	0	0	0	0	2	0	0	0	0	0	0	0	0	0	1	0	0	0	0	0	0	0	0	2	0	1	1	0	0	0	1	0	0	1	0	0	0	1	0	0	0	2	0	0	0	0	1	0	0
OTU_1549	0	1	0	0	0	0	0	0	0	0	0	0	0	0	0	2	0	0	1	0	0	0	0	0	0	0	0	1	0	0	0	0	1	0	0	0	0	0	0	0	0	0	0	0	0	0	0	0	0
OTU_2488	0	0	1	0	0	1	0	0	0	0	1	1	1	1	0	1	0	0	0	0	0	1	0	1	0	1	0	0	0	0	1	1	1	0	1	0	0	0	0	0	0	2	1	1	1	0	1	1	0
OTU_2059	0	1	1	0	0	0	0	0	1	0	0	2	0	0	1	0	0	0	0	0	0	0	2	1	1	1	0	0	2	0	0	0	0	0	0	0	0	0	0	0	0	0	0	0	0	0	0	0	0
OTU_978	1	2	0	0	1	1	0	0	0	0	0	0	0	0	0	0	0	0	0	0	0	0	0	0	0	1	1	0	0	0	0	0	0	2	0	0	0	0	0	0	0	3	0	0	0	0	0	0	0
OTU_550	0	0	0	1	1	1	1	0	0	0	0	4	1	1	1	0	0	0	0	0	0	0	0	0	0	5	0	0	1	0	0	0	0	1	1	0	1	0	0	0	0	2	0	0	0	0	0	0	0
OTU_1183	1	0	0	0	0	0	0	0	0	0	0	0	0	0	0	0	0	0	0	0	0	1	4	1	0	2	0	2	0	0	0	0	0	0	0	0	0	0	0	0	0	0	0	0	0	0	2	0	0
OTU_1160	0	0	1	1	0	0	2	0	1	0	0	0	1	0	0	0	3	1	1	0	0	1	0	0	1	2	0	0	1	0	2	1	0	0	0	0	2	0	0	0	0	0	0	0	1	0	0	0	1
OTU_528	0	3	0	0	0	0	0	0	0	0	0	0	5	0	0	0	4	0	1	1	3	0	0	0	0	0	2	0	0	0	0	0	0	0	5	0	0	0	0	0	0	0	1	0	0	0	0	1	0
OTU_1547	0	1	2	0	0	0	0	0	0	0	0	2	0	0	0	0	0	0	0	0	0	0	0	0	0	1	0	0	0	1	0	0	0	1	0	0	0	0	0	0	0	1	0	2	0	0	0	0	0
OTU_1842	0	0	0	0	0	0	0	0	0	0	0	0	0	0	0	0	1	0	0	0	0	0	0	1	1	0	0	0	0	0	0	0	0	0	0	0	0	1	0	0	0	0	0	0	0	0	0	0	0
OTU_1196	1	0	0	0	0	1	0	0	7	1	0	3	0	2	2	0	1	0	0	0	0	0	0	1	0	0	0	1	0	0	0	0	0	0	0	1	0	1	1	1	0	0	0	0	0	0	0	0	0
OTU_598	0	1	0	0	1	0	0	0	1	0	0	0	0	0	0	1	0	0	0	0	0	1	0	0	1	7	0	0	0	1	3	0	1	0	0	0	0	1	0	0	1	0	0	0	1	0	0	1	1
OTU_2015	1	0	0	4	0	0	0	0	1	0	0	0	2	0	0	0	0	0	0	0	0	0	0	0	0	0	0	0	1	1	0	0	0	0	1	1	0	1	1	0	0	0	0	0	0	0	0	1	0
OTU_1390	0	0	0	0	0	0	0	0	2	0	0	0	0	3	2	0	0	0	0	0	0	0	0	0	0	0	0	0	0	0	0	0	0	0	0	0	0	0	1	0	0	0	0	0	0	0	0	0	0
OTU_1791	0	0	0	0	0	4	0	0	0	0	0	0	0	0	0	0	0	0	0	0	0	0	2	0	0	1	0	0	0	0	0	0	0	0	0	0	0	0	0	0	0	0	0	0	0	1	0	0	0
OTU_2203	0	0	1	0	0	0	0	0	0	0	2	0	0	0	0	0	0	0	0	0	0	1	0	0	0	0	0	0	0	0	0	0	0	0	0	0	0	1	0	0	0	0	0	0	0	0	0	0	0
OTU_1965	0	0	0	0	0	0	0	0	0	0	0	0	0	0	0	0	0	0	0	0	0	0	0	1	0	0	0	0	0	0	0	0	0	0	0	0	0	0	1	0	0	0	0	0	0	0	0	0	0
OTU_1424	0	0	0	3	1	0	0	0	0	0	0	1	1	0	0	0	0	0	0	0	0	0	0	0	0	1	0	2	0	0	0	0	0	0	0	0	0	0	0	0	0	0	0	0	0	0	0	0	0
OTU_1405	1	2	7	1	0	0	0	0	1	1	0	0	0	2	1	0	0	0	0	0	1	4	0	0	0	0	0	2	1	2	0	2	1	0	0	0	0	0	0	1	0	0	0	0	0	1	0	0	1
OTU_705	0	1	1	0	1	0	3	0	1	1	0	0	1	0	0	0	0	3	0	0	0	0	0	1	0	1	1	1	1	1	0	0	0	2	0	4	1	0	0	2	0	0	0	5	2	2	0	0	0
OTU_2269	0	0	0	0	0	0	0	0	0	0	0	0	0	0	0	0	0	0	0	0	0	0	1	0	0	0	0	0	0	0	0	0	0	0	0	1	0	1	0	0	0	0	0	0	0	0	0	0	0
OTU_1569	0	0	0	0	0	0	0	0	0	0	0	0	0	0	0	0	0	0	0	0	1	0	0	1	0	1	0	0	0	0	0	0	1	0	0	0	0	0	0	0	0	1	0	0	0	0	0	6	0
OTU_1064	0	2	3	0	0	0	0	1	0	0	0	0	0	0	0	0	0	0	0	0	0	0	0	0	0	0	0	0	1	1	0	1	0	0	0	1	0	0	0	1	0	0	1	0	0	0	0	0	0
OTU_1006	0	1	2	0	1	0	2	0	1	2	0	0	0	0	0	1	1	0	0	0	0	0	0	0	0	2	0	0	0	0	0	0	0	0	1	2	0	0	0	1	0	0	0	2	0	1	0	0	0
OTU_1348	0	2	0	0	0	1	0	0	0	0	0	0	1	0	0	0	0	0	0	2	1	0	0	0	1	0	0	0	0	0	0	0	0	0	0	0	0	0	0	2	1	0	0	0	0	0	0	0	0
OTU_940	0	0	0	0	0	0	0	0	0	0	0	0	0	0	0	0	0	0	0	0	0	0	0	1	0	2	0	0	0	0	0	2	0	0	0	0	0	0	0	0	0	0	0	0	0	0	0	1	0
OTU_2313	0	0	0	0	1	0	0	0	0	0	0	0	0	0	0	0	0	0	0	0	0	0	0	0	1	0	0	0	0	0	0	0	0	0	0	0	0	0	0	0	0	0	0	0	0	0	0	0	0
OTU_2209	0	1	0	0	0	0	0	0	0	0	0	0	0	0	0	1	0	0	1	0	0	1	0	0	0	0	0	0	0	0	0	0	2	0	0	0	0	0	0	0	0	0	0	0	0	0	0	0	0
OTU_2126	0	0	0	0	0	0	0	0	0	0	0	0	0	0	0	0	0	0	0	0	0	2	1	0	0	1	0	0	0	0	0	0	0	0	0	0	0	0	0	0	0	0	0	1	0	0	0	0	0
OTU_2311	0	0	0	0	0	1	0	0	0	0	0	0	0	2	0	0	0	0	0	0	0	0	0	1	0	2	0	1	0	0	0	0	0	0	0	0	0	1	0	0	0	0	0	0	0	0	0	1	0
OTU_1369	1	0	0	0	0	0	0	0	0	0	0	0	0	0	0	0	0	0	0	0	0	0	0	1	0	0	0	0	0	0	0	0	0	0	0	9	0	0	0	0	0	0	0	0	0	0	0	0	0
OTU_2469	1	0	0	1	0	0	0	0	4	0	0	0	0	0	0	1	0	0	0	0	0	0	0	0	0	0	0	0	0	0	0	0	0	0	0	0	0	0	0	0	0	0	1	0	0	0	0	0	0
OTU_1910	0	0	0	0	0	0	0	0	1	0	0	0	0	0	1	0	0	0	0	0	0	0	0	0	0	1	0	0	0	0	0	0	0	0	5	0	0	1	0	0	0	0	0	0	0	0	0	0	0
OTU_2153	0	0	0	0	0	0	0	1	0	0	1	0	0	0	0	0	0	0	0	0	0	0	0	0	0	0	0	0	0	0	0	0	0	0	0	0	0	0	0	0	0	0	0	0	0	0	0	0	0
OTU_1843	0	4	1	0	1	0	0	0	0	0	0	0	0	0	0	1	0	0	1	0	0	1	1	0	0	0	0	0	0	0	0	0	0	1	0	0	0	1	0	0	0	0	0	0	0	0	0	0	1
OTU_2066	0	0	0	0	0	0	0	0	0	0	0	0	0	0	0	0	0	0	0	0	0	0	0	0	0	0	0	0	0	0	0	0	0	0	0	0	0	0	0	0	0	0	0	0	0	0	0	0	0
OTU_1559	0	0	0	0	0	0	0	0	0	0	0	0	0	0	0	0	0	0	0	0	0	0	0	3	1	0	0	0	0	0	0	0	0	0	0	0	1	0	0	1	0	0	0	0	0	0	0	0	0
OTU_2340	0	1	0	0	0	0	0	2	0	0	0	0	0	0	0	1	0	0	0	0	0	0	0	0	0	0	0	0	0	1	0	0	0	0	0	0	0	0	1	0	0	0	0	0	0	0	0	0	0
OTU_2175	0	1	0	0	0	0	0	0	1	0	0	0	1	0	0	0	0	0	0	0	0	0	0	0	0	0	0	0	0	0	0	0	0	0	0	1	1	0	0	0	0	0	0	1	0	0	0	0	0
OTU_1911	0	0	0	0	0	0	0	0	0	1	0	1	0	0	0	0	0	0	0	0	0	0	0	0	0	0	0	0	0	0	0	0	0	0	0	0	4	0	0	0	0	0	0	1	0	0	0	0	0
OTU_552	0	3	0	0	1	1	2	0	7	0	0	2	0	1	0	2	0	0	0	2	0	0	1	0	1	3	2	0	1	0	0	0	0	1	0	0	2	3	0	0	0	0	0	1	2	2	0	0	2
OTU_1394	0	0	1	0	0	1	0	0	0	0	0	0	0	0	0	0	1	0	0	0	0	3	1	1	0	0	0	0	0	5	2	3	0	0	1	0	0	0	0	0	0	0	1	0	1	0	0	0	0
OTU_2390	0	0	0	0	0	2	0	0	0	0	0	0	0	0	0	0	0	0	0	0	0	0	0	0	0	0	0	0	0	0	0	0	0	0	0	0	0	0	0	1	0	0	0	0	0	0	0	0	0
OTU_2328	0	1	0	0	0	0	0	0	0	0	0	0	0	0	0	0	0	0	0	1	0	0	0	0	0	0	0	0	0	0	0	0	0	0	3	0	0	0	0	0	0	0	0	0	0	0	0	0	0
OTU_1806	0	0	0	0	0	0	0	0	1	0	0	1	0	0	0	0	0	0	0	0	0	0	0	1	0	0	0	0	0	0	0	0	0	0	0	1	0	0	0	0	1	0	0	0	0	0	0	0	0
OTU_764	0	1	1	0	0	1	0	0	2	0	0	1	0	1	0	2	1	1	1	0	1	0	2	0	0	1	0	1	0	1	0	0	0	0	0	1	1	3	0	3	0	0	0	0	0	1	0	0	2
OTU_1488	0	0	1	0	0	0	0	0	0	0	1	0	0	0	0	0	0	0	0	0	1	0	0	0	0	0	0	0	0	0	1	2	0	0	0	0	0	0	0	0	0	0	0	0	0	1	0	0	1
OTU_2098	0	0	0	0	0	0	0	0	0	1	0	0	0	0	0	0	0	0	0	0	0	0	0	0	0	1	0	0	0	1	0	1	0	0	0	0	0	0	0	0	0	0	0	0	0	1	0	0	0
OTU_2129	0	0	0	0	0	0	0	0	0	0	0	1	0	0	0	0	0	0	0	0	1	0	0	0	0	0	0	0	1	0	0	0	0	0	0	0	0	1	0	0	0	0	0	1	3	0	0	0	0
OTU_1658	0	0	0	0	1	5	0	3	1	0	0	2	0	0	0	2	2	1	0	0	0	0	0	0	0	0	1	0	0	0	0	0	1	0	1	0	1	0	0	0	0	1	0	0	2	0	0	0	0
OTU_1811	0	0	0	0	0	0	0	2	1	0	0	0	0	0	0	0	0	0	0	0	0	0	4	0	0	0	0	0	0	0	0	0	0	0	0	0	0	0	0	0	0	0	0	0	0	0	0	0	1
OTU_381	0	1	0	2	1	2	0	0	0	0	0	0	0	0	0	0	0	0	0	0	0	0	1	1	0	1	0	1	0	1	0	2	0	9	0	0	1	1	0	0	1	2	0	0	2	0	0	0	0
OTU_756	0	0	0	0	0	3	0	0	0	0	0	0	0	0	0	0	1	0	0	1	0	2	0	0	0	0	1	0	0	0	0	0	0	0	1	0	1	0	1	1	0	0	0	0	0	0	0	0	1
OTU_2167	0	1	0	0	0	0	0	0	0	0	0	0	0	0	0	0	0	0	0	0	0	0	0	0	0	1	0	0	0	0	0	0	0	0	0	2	3	0	0	0	0	0	0	1	0	0	0	0	0
OTU_2156	0	0	0	0	0	0	0	0	0	0	0	0	0	0	0	0	0	0	0	0	1	3	0	0	0	0	0	0	0	0	0	0	0	0	0	0	0	0	0	0	0	0	0	0	0	0	0	0	0
OTU_1255	0	4	0	1	2	0	0	1	1	0	1	0	2	1	1	1	1	1	1	0	0	0	0	0	1	3	0	1	0	0	2	1	0	0	1	1	0	1	0	1	1	2	3	1	0	0	2	0	2
OTU_1125	0	0	0	0	0	0	0	0	3	0	0	1	0	0	0	0	0	0	0	1	0	0	0	0	0	8	0	0	0	0	0	0	0	0	0	0	0	2	0	0	0	0	0	0	0	0	0	0	0
OTU_533	0	2	2	2	0	0	0	2	1	0	1	1	1	1	1	1	0	0	0	1	1	5	0	0	0	0	1	1	0	0	0	1	0	0	0	0	0	0	0	2	1	0	0	0	0	1	0	0	3
OTU_2143	0	0	0	0	0	0	0	0	0	0	0	0	0	0	0	0	0	0	0	0	0	0	0	0	0	0	0	1	0	0	0	0	0	0	0	0	0	0	0	0	0	0	0	1	0	0	0	0	0
OTU_2207	0	1	2	2	0	0	0	0	1	0	0	1	0	0	0	0	0	0	0	0	0	0	0	0	0	1	0	0	0	0	0	0	0	0	0	1	0	1	0	0	0	0	0	0	0	0	0	0	1
OTU_2184	1	0	0	1	0	0	0	0	0	1	0	1	2	0	0	1	0	0	0	1	1	0	0	0	0	1	0	0	0	0	0	0	0	0	0	0	1	0	0	1	2	0	0	0	0	0	1	0	0
OTU_1326	0	0	0	1	0	1	0	0	0	0	1	0	0	0	0	0	1	0	0	0	0	0	0	0	2	0	0	0	0	0	0	0	0	0	0	0	0	0	0	0	0	0	0	0	0	3	0	0	0
OTU_1306	0	0	3	1	0	0	0	0	1	0	0	0	2	0	0	0	1	0	0	0	0	2	1	0	0	1	0	0	1	0	1	0	0	0	1	0	1	0	1	0	0	0	0	0	1	0	0	0	1
OTU_781	0	1	1	0	0	0	0	1	0	0	0	0	0	0	2	0	0	0	0	0	0	0	0	1	0	0	0	0	1	0	1	0	0	0	0	1	0	0	1	0	0	0	0	0	0	0	0	0	1
OTU_1133	0	0	0	0	0	0	0	0	0	0	0	0	0	0	0	0	0	0	0	0	5	0	0	0	0	0	0	0	0	1	1	6	0	0	0	0	0	0	0	0	0	0	0	0	0	0	0	0	0
OTU_1670	0	0	1	1	0	0	0	1	0	0	0	0	0	1	0	1	0	0	0	0	0	0	0	0	0	0	0	0	1	0	0	1	0	0	0	0	0	0	2	0	0	0	0	0	0	0	0	0	0
OTU_292	0	1	0	7	1	3	1	0	3	1	0	1	0	0	0	0	0	2	0	0	0	0	0	1	5	1	0	4	1	0	0	2	0	0	0	0	1	5	0	1	0	1	0	2	0	1	0	0	0
OTU_2559	0	0	0	0	0	0	1	0	0	0	0	0	0	0	0	0	0	0	0	0	0	0	0	0	1	1	0	0	0	0	0	0	0	0	0	0	0	2	0	0	0	0	0	0	0	0	0	0	0
OTU_1072	0	0	0	1	0	0	0	0	0	0	0	0	1	0	0	1	2	0	0	1	0	0	0	0	2	0	0	0	1	0	0	0	0	0	0	0	0	0	0	0	0	0	0	0	0	0	0	1	1
OTU_1994	0	0	0	0	0	0	0	0	2	0	0	3	0	0	0	0	0	0	0	0	0	0	1	0	0	0	0	0	0	0	0	1	0	0	0	0	0	0	0	0	0	0	0	0	0	0	0	0	0
OTU_2063	0	0	0	0	0	0	0	0	0	0	1	0	0	0	0	1	0	0	0	0	0	0	0	0	0	0	0	0	0	0	0	0	0	0	0	0	0	0	2	0	0	0	0	0	1	1	0	0	1
OTU_913	1	4	0	0	1	0	0	0	0	1	1	0	1	1	0	1	0	0	1	0	1	0	0	0	1	0	0	0	0	0	1	2	0	1	0	1	0	1	0	0	1	0	0	0	0	1	0	1	1
OTU_1193	0	0	0	1	0	0	0	0	0	0	0	1	0	0	0	0	0	0	0	0	0	0	0	0	0	0	0	0	0	0	0	0	0	1	0	0	0	1	0	0	0	0	0	0	0	0	0	0	0
OTU_417	1	2	0	1	0	1	0	0	0	0	0	5	1	1	0	0	1	0	0	0	4	0	0	0	4	3	1	5	0	0	0	0	0	0	0	1	2	2	0	1	0	0	0	0	2	3	0	0	0
OTU_2068	2	0	1	1	0	0	0	0	1	0	0	0	0	0	0	1	1	1	0	0	1	0	2	0	0	1	0	0	0	0	0	0	0	0	0	0	1	1	0	0	0	0	2	0	0	2	1	1	0
OTU_1137	0	0	0	0	0	0	1	0	0	0	0	0	0	0	0	0	0	0	0	0	0	0	0	0	0	0	0	1	0	0	0	0	0	0	0	0	0	0	1	1	0	0	0	0	1	0	0	1	0
OTU_2131	0	0	0	3	0	1	0	0	0	0	0	0	0	0	0	1	1	0	0	0	0	1	0	0	0	0	0	0	0	0	0	0	0	0	0	1	0	1	0	0	0	0	0	0	0	0	0	0	0
OTU_1677	1	0	0	1	0	0	0	0	2	0	0	1	0	0	0	0	0	0	0	0	0	0	0	0	0	0	0	0	0	0	0	0	0	0	0	0	1	0	0	1	0	0	0	0	0	0	0	0	0
OTU_1417	0	0	0	0	0	0	0	0	0	0	0	0	0	1	1	0	0	0	0	0	0	0	0	0	2	0	0	0	0	0	0	0	1	0	0	0	0	0	0	0	0	1	0	0	0	0	0	0	1
OTU_1566	0	0	0	1	0	1	2	0	1	0	1	2	0	1	0	2	0	2	0	0	1	1	0	0	2	1	1	2	1	0	0	1	1	2	0	0	0	2	0	0	0	0	0	0	0	0	0	0	1
OTU_1358	0	0	0	0	0	2	0	0	1	2	0	0	0	0	0	1	0	0	0	0	0	0	0	0	1	1	0	1	0	0	0	0	0	0	0	0	0	0	0	0	0	0	0	0	0	0	0	0	2
OTU_1619	0	0	7	0	0	2	0	0	0	0	0	0	0	0	0	3	0	1	4	0	0	1	0	0	0	1	0	2	0	1	0	0	0	0	0	1	0	0	0	0	0	0	0	0	0	0	0	0	5
OTU_2442	0	0	0	0	0	0	0	0	0	0	0	0	0	0	0	0	2	0	0	0	0	0	1	0	0	0	0	0	0	0	1	0	0	0	0	0	0	0	0	0	0	0	0	0	0	0	0	0	0
OTU_917	1	1	0	0	3	2	0	0	1	0	0	0	0	1	0	0	0	0	0	1	0	0	0	1	1	2	0	4	0	0	0	0	0	0	0	0	0	0	1	1	0	0	0	0	1	1	0	0	1
OTU_1799	0	0	0	0	0	0	3	0	0	0	0	0	0	0	0	0	0	0	0	0	0	0	0	0	0	0	0	0	0	0	0	0	0	0	0	0	0	0	0	0	0	0	0	0	0	0	1	0	0
OTU_2148	0	0	0	0	0	0	0	0	0	0	0	0	0	0	0	0	0	0	0	0	0	0	0	0	0	0	0	0	0	0	0	0	0	0	0	0	0	0	0	0	0	0	0	0	0	0	0	0	0
OTU_759	0	0	0	0	0	0	0	0	0	0	0	0	0	0	0	0	14	0	0	0	0	0	0	0	0	0	0	0	0	0	0	0	0	0	0	0	0	0	0	0	0	0	0	0	0	0	0	0	0
OTU_2147	1	0	0	0	0	0	0	0	0	0	0	2	0	1	0	1	0	0	0	0	0	0	0	0	0	0	0	0	0	0	1	0	0	0	0	0	0	0	0	0	0	0	0	0	0	0	0	0	0
OTU_2369	0	0	1	0	0	0	1	0	0	1	0	0	0	0	0	0	0	0	0	0	0	0	0	0	0	0	0	0	0	0	0	3	0	0	0	0	2	0	0	0	0	0	0	0	1	0	0	1	0
OTU_1609	0	0	0	2	0	0	2	0	1	0	1	0	0	0	0	0	0	0	0	0	0	0	1	0	0	0	0	3	0	0	0	1	0	0	0	0	0	1	0	0	0	0	0	0	0	0	0	0	0
OTU_1389	0	0	1	0	0	0	0	0	0	0	0	0	0	0	0	0	0	0	0	1	2	0	0	0	0	0	0	2	2	0	0	0	1	0	0	0	0	0	0	0	0	0	6	0	0	0	0	0	0
OTU_1345	0	1	0	0	0	0	0	0	0	0	0	1	0	0	0	1	0	0	0	4	0	0	0	0	0	1	0	0	0	0	0	0	0	0	0	0	0	0	0	0	0	0	0	0	0	0	0	0	0
OTU_1239	0	1	0	1	0	2	1	0	0	2	1	0	0	1	0	0	0	0	0	0	0	0	0	0	1	0	0	1	0	0	1	0	0	0	0	0	0	1	0	1	0	0	0	0	0	1	0	0	0
OTU_1435	1	0	0	2	0	0	0	0	1	0	0	0	0	0	0	0	0	0	0	0	0	0	0	0	0	0	0	0	0	0	0	0	0	0	0	1	0	0	0	0	0	0	0	0	0	0	0	1	0
OTU_963	1	0	1	0	0	0	1	0	0	1	1	1	0	2	0	0	0	0	0	0	0	0	0	0	0	1	0	1	0	1	0	0	0	1	0	0	0	0	0	0	0	0	0	0	0	0	0	0	0
OTU_2276	0	1	0	0	2	1	1	1	0	0	0	0	0	0	0	0	0	1	1	0	1	0	0	0	0	0	0	0	0	0	0	0	0	0	0	0	0	0	0	0	0	2	0	0	0	0	0	0	0
OTU_2308	0	0	5	0	0	0	0	0	0	0	0	0	0	0	0	0	0	0	0	0	0	0	0	0	0	0	0	1	0	0	0	0	0	0	0	0	0	0	0	0	0	0	0	0	0	0	0	0	0
OTU_1845	1	0	1	0	0	0	0	0	1	2	1	5	0	1	0	0	0	2	0	0	0	0	0	1	1	2	0	1	1	0	0	0	0	1	0	0	0	0	3	1	0	0	1	1	0	1	0	0	0
OTU_1963	1	1	1	1	0	0	1	0	2	1	0	0	0	0	0	0	0	0	0	0	0	0	1	0	1	2	0	2	0	0	0	0	0	0	0	0	0	2	0	1	0	0	0	2	1	0	0	0	0
OTU_2284	0	0	0	0	0	0	0	1	0	0	3	0	0	0	0	0	0	0	0	0	0	0	1	2	2	0	0	0	0	0	1	0	0	0	0	2	1	0	0	1	4	0	1	1	1	1	0	0	0
OTU_587	0	0	0	2	0	1	0	0	1	1	0	0	0	1	0	2	0	0	1	0	0	2	0	1	0	0	0	1	0	1	0	0	0	3	0	0	1	1	0	0	0	0	0	1	5	0	0	0	2
OTU_974	0	0	0	0	0	0	0	0	0	0	0	0	0	0	0	0	0	0	0	0	0	0	0	0	1	0	0	0	0	0	0	0	0	0	0	0	0	0	0	0	0	0	0	0	0	0	1	0	0
OTU_908	0	0	0	0	0	0	0	0	0	0	1	0	0	0	0	1	1	0	4	0	0	1	0	0	0	0	0	0	0	0	1	0	0	0	0	0	0	0	0	0	0	0	0	0	0	0	0	1	3
OTU_1669	0	0	0	0	0	0	0	1	0	0	3	0	0	0	0	0	0	0	0	0	0	0	0	0	0	1	0	0	0	0	0	0	0	0	0	0	0	0	0	0	0	0	0	0	0	1	0	1	0
OTU_1747	0	0	1	0	0	0	0	0	0	0	0	1	0	0	0	0	0	0	0	1	0	1	0	0	0	0	1	1	1	0	0	0	0	0	0	0	0	0	0	0	0	0	0	0	0	0	0	2	0
OTU_1754	0	1	0	0	0	0	0	0	0	0	0	1	0	0	0	0	0	0	0	0	0	0	0	3	1	0	0	0	1	0	0	0	0	0	0	0	0	0	0	0	1	0	0	0	0	0	0	0	0
OTU_2473	0	0	0	0	0	0	0	0	0	0	0	1	0	0	0	0	0	0	0	0	0	0	0	0	0	0	0	1	0	0	1	0	0	0	0	0	0	0	0	0	3	0	0	0	0	0	0	0	0
OTU_1460	0	1	0	0	0	0	2	0	0	0	1	2	0	0	0	0	0	0	0	0	0	0	0	3	0	1	0	0	4	0	0	1	0	0	0	1	0	0	2	0	0	0	0	1	0	0	0	0	0
OTU_1621	0	0	0	0	0	0	0	0	0	0	0	0	0	0	0	0	0	0	0	1	0	0	0	0	1	0	0	0	0	0	0	0	0	0	0	1	0	0	0	0	0	0	0	0	1	0	0	0	0
OTU_1832	0	0	0	0	0	0	0	0	0	0	0	0	0	0	1	0	0	0	0	0	1	0	0	0	0	0	0	0	0	1	0	0	0	0	0	0	0	0	0	0	0	0	0	1	0	2	0	0	0
OTU_1033	0	0	4	0	0	0	0	0	0	0	0	3	0	1	0	1	1	0	0	0	0	0	0	1	0	0	0	1	0	0	0	0	0	0	1	1	1	0	0	3	0	2	0	0	0	0	0	0	3
OTU_2500	0	0	0	0	0	0	0	0	0	0	0	0	0	0	0	0	0	0	0	0	0	0	0	0	0	1	0	0	0	0	0	1	0	0	0	0	0	0	0	0	0	0	0	0	0	0	0	0	0
OTU_1136	0	0	0	0	0	2	0	1	0	1	0	0	1	0	0	3	4	0	0	0	0	0	1	0	0	0	0	2	0	0	0	0	0	0	0	0	1	5	0	0	1	0	0	1	0	0	0	0	0
OTU_1497	0	0	0	0	0	0	0	0	0	0	0	0	0	0	0	0	0	0	0	0	0	0	0	0	0	0	0	0	0	0	0	0	0	5	0	0	0	0	0	0	0	0	0	0	0	0	0	0	0
OTU_1854	0	1	0	0	3	0	0	0	2	0	0	0	0	0	0	0	0	0	0	0	1	0	0	0	0	0	0	0	0	0	0	0	0	0	0	1	0	0	0	0	0	0	0	0	0	0	0	0	3
OTU_725	0	0	0	3	0	1	0	1	1	0	0	0	0	0	0	0	0	0	0	0	0	1	0	0	1	1	0	0	0	0	1	0	0	0	0	0	0	0	1	1	0	0	0	0	0	1	0	0	3
OTU_1331	0	0	0	0	0	0	1	0	0	1	0	0	0	0	0	0	0	0	0	0	0	0	1	0	1	1	0	0	0	0	0	0	0	0	0	0	0	0	0	2	0	0	0	0	1	0	2	0	0
OTU_826	0	2	0	0	0	0	0	0	0	0	0	0	0	0	0	0	0	0	0	2	0	0	0	0	1	0	0	0	0	0	0	0	0	0	0	0	1	0	0	0	0	0	0	0	0	0	0	0	0
OTU_1846	0	0	1	0	0	0	0	0	0	0	0	0	0	1	0	0	0	0	0	0	0	0	0	0	0	0	0	0	0	0	0	0	0	0	0	0	0	0	0	0	0	0	0	0	0	0	0	0	0
OTU_2393	0	0	1	0	0	0	0	0	0	0	0	0	1	0	0	0	0	0	0	0	0	0	0	0	0	0	0	2	1	0	0	0	0	0	0	0	0	0	0	0	0	0	0	1	0	0	0	0	1
OTU_2345	0	1	0	0	1	0	0	0	1	0	0	0	0	0	0	0	0	0	0	0	0	0	0	0	0	0	0	0	0	0	0	0	0	0	0	0	0	0	0	1	0	0	0	0	0	0	0	0	0
OTU_1704	1	0	0	0	0	0	1	0	0	0	0	0	0	0	0	0	0	1	0	0	0	0	0	0	0	0	0	0	0	0	0	0	0	1	0	0	0	0	0	1	0	0	0	1	0	1	0	0	0
OTU_458	0	0	3	2	1	1	1	1	3	0	3	0	0	0	0	0	1	0	0	2	0	0	0	0	0	1	0	0	1	0	0	0	0	1	0	0	3	0	0	0	2	1	0	2	1	1	1	0	0
OTU_739	1	4	1	0	2	0	0	0	0	0	0	0	0	0	0	0	1	1	0	2	0	0	0	2	0	0	0	0	4	0	0	0	0	0	2	0	0	1	0	1	0	0	0	0	0	0	1	3	1
OTU_732	0	1	1	0	0	0	0	0	0	0	0	0	0	0	0	0	0	0	0	0	1	0	0	0	0	1	2	0	0	0	0	0	0	0	0	0	1	1	1	0	0	0	0	0	1	1	1	0	0
OTU_1377	0	0	0	0	0	0	0	1	0	1	0	0	0	0	0	0	0	0	0	0	0	0	0	0	0	0	0	0	1	1	1	0	0	0	0	0	0	0	0	0	1	0	0	0	0	0	0	0	0
OTU_1011	0	2	2	0	0	0	0	0	0	1	0	0	2	3	0	0	1	0	1	0	0	2	0	0	0	1	0	1	0	1	1	3	0	2	1	0	0	0	2	1	0	0	1	0	1	0	0	0	4
OTU_1498	0	1	0	5	0	1	0	0	0	0	0	0	0	0	0	0	0	0	0	0	1	0	0	0	0	0	0	0	0	0	0	0	0	0	0	0	0	1	2	0	0	0	0	1	0	0	0	0	0
OTU_2149	0	0	1	0	0	0	0	0	0	0	0	0	0	0	0	0	0	0	0	0	0	0	0	0	0	0	0	0	1	1	0	1	0	1	0	0	1	0	0	0	1	0	0	0	0	0	0	0	0
OTU_941	0	0	0	0	0	0	0	0	3	0	0	0	0	0	0	0	0	0	0	1	0	0	0	0	1	0	0	0	0	0	0	0	0	0	0	0	0	0	0	0	2	0	0	1	1	1	0	0	0
OTU_916	1	1	0	0	1	0	0	0	1	0	1	0	1	1	0	4	0	0	0	0	1	1	0	0	0	3	1	1	0	0	0	0	0	0	0	1	0	0	0	1	0	0	0	0	0	1	0	0	0
OTU_2075	0	0	0	0	1	0	0	0	0	0	0	1	0	1	0	0	0	0	0	0	0	0	0	1	0	1	0	0	0	0	0	0	0	0	0	0	0	0	0	0	2	0	0	0	0	0	0	0	0
OTU_1007	0	1	0	0	0	1	0	4	1	0	0	0	0	0	0	0	0	0	0	0	0	1	0	0	0	0	1	0	0	3	0	1	1	0	0	0	2	0	0	0	0	0	0	0	0	0	0	1	0
OTU_1665	0	2	0	0	0	1	0	0	0	0	1	0	0	0	0	1	1	0	0	0	0	1	0	0	0	0	1	0	0	0	2	0	1	1	0	0	0	0	1	1	0	0	0	1	0	0	0	0	0
OTU_657	1	2	1	1	0	1	0	0	0	0	0	1	0	0	0	0	0	1	0	0	0	1	0	1	1	0	0	3	0	0	0	0	0	0	0	0	0	1	0	1	0	0	0	0	0	0	0	1	0
OTU_1848	0	0	0	0	0	0	0	0	0	0	0	0	0	0	0	0	0	0	0	0	0	0	0	0	0	5	0	0	1	0	0	0	0	0	0	0	0	1	0	0	0	0	0	0	0	0	0	1	0
OTU_1705	0	1	0	0	0	0	0	0	0	0	0	0	1	0	0	0	0	0	1	0	0	1	0	0	0	0	1	0	0	1	1	0	0	0	0	0	0	0	0	0	0	0	0	0	0	0	0	1	0
OTU_1379	0	0	0	0	0	0	0	0	0	0	0	0	0	0	0	0	0	0	0	0	0	0	0	0	0	0	0	0	0	0	0	0	0	0	0	0	0	0	0	0	0	0	0	0	0	0	0	0	0
OTU_2206	0	0	0	0	0	0	0	1	0	1	0	0	0	0	0	0	0	0	0	0	0	0	0	0	0	0	0	0	0	1	0	0	0	2	0	0	0	0	0	0	0	0	0	0	0	0	0	0	0
OTU_878	0	1	0	3	0	1	0	0	1	0	0	0	0	0	0	0	0	0	0	0	0	0	1	0	1	1	0	0	0	0	0	0	0	1	0	0	1	0	0	1	0	1	0	3	1	0	0	0	0
OTU_2257	0	0	1	0	0	0	0	0	0	0	0	0	0	0	0	0	0	0	0	1	0	1	0	0	0	0	0	0	0	1	0	1	0	1	0	1	0	0	0	0	0	0	0	0	0	0	0	0	0
OTU_821	0	0	0	0	0	0	0	0	0	0	0	0	0	0	0	0	0	0	0	0	0	0	0	0	0	0	0	0	0	0	0	0	0	8	0	0	0	0	0	0	0	7	0	0	0	0	0	0	0
OTU_774	0	1	0	0	0	1	0	0	0	0	2	1	0	0	0	0	0	0	0	0	0	0	0	1	0	0	0	1	0	0	0	0	0	0	0	0	2	1	0	0	0	1	0	0	0	0	0	0	1
OTU_719	0	0	0	0	1	2	0	0	1	0	0	2	0	0	1	0	0	1	1	0	0	1	0	0	0	0	0	0	0	1	0	1	0	3	0	2	0	1	0	1	0	0	0	0	0	0	0	1	0
OTU_735	0	0	0	0	0	0	2	0	0	0	0	2	0	0	0	0	9	0	0	0	0	0	0	0	0	1	1	0	1	0	2	1	0	2	0	0	1	0	0	0	0	2	0	2	0	1	0	1	0
OTU_2357	0	0	0	0	1	1	0	0	0	0	0	0	0	1	0	0	0	0	0	0	0	0	2	2	0	0	0	0	0	0	0	2	0	0	1	0	1	0	0	0	0	0	1	1	0	0	0	0	0
OTU_738	2	0	0	0	1	0	0	0	0	0	0	0	0	0	0	1	1	0	1	0	0	3	0	0	1	0	0	0	0	0	0	0	0	0	0	0	1	0	0	0	0	0	0	0	0	0	1	0	0
OTU_1235	0	1	0	0	0	0	0	0	0	0	0	1	0	0	0	1	7	0	0	0	0	0	0	0	0	0	0	0	0	0	0	0	0	0	0	0	0	0	1	0	1	0	0	0	0	0	0	0	0
OTU_2013	1	0	0	0	0	0	0	0	0	0	0	1	0	0	0	0	0	0	0	0	0	0	0	0	0	0	0	0	0	0	0	0	1	0	0	0	2	0	0	0	0	0	0	0	0	0	0	0	0
OTU_804	0	0	0	0	2	0	0	0	1	0	1	0	0	0	0	0	1	0	0	0	1	0	0	0	10	0	0	0	1	0	0	0	1	1	0	0	0	0	0	0	0	0	0	0	0	1	0	0	0
OTU_559	1	0	2	3	0	0	0	1	2	0	0	0	1	1	0	0	0	0	0	2	0	3	0	0	0	0	3	0	0	0	0	0	0	0	0	0	2	1	0	0	2	0	0	0	0	1	0	0	0
OTU_796	0	0	2	0	1	1	0	2	5	0	2	0	2	4	0	1	9	1	3	0	0	1	0	3	1	1	0	0	1	2	2	1	1	1	3	3	0	1	1	3	1	0	0	0	1	1	0	0	0
OTU_2289	0	0	0	0	0	0	0	0	0	0	0	1	0	0	0	0	0	0	0	0	0	0	0	0	0	0	0	0	0	0	0	0	0	0	0	0	0	0	0	0	0	1	0	0	0	0	0	0	0
OTU_2146	0	0	0	2	0	1	0	0	0	0	2	0	0	0	0	0	0	0	0	0	0	0	0	0	0	0	0	0	0	0	0	0	0	0	0	0	0	0	0	0	0	0	0	0	0	0	0	0	0
OTU_1122	0	1	0	1	0	0	0	0	0	0	0	0	0	1	0	5	0	2	1	0	0	0	0	0	1	0	0	0	0	0	0	0	0	0	0	0	0	1	0	1	0	0	0	0	1	0	0	0	1
OTU_1628	0	0	0	0	0	0	0	0	0	0	0	0	0	0	0	0	0	0	0	0	1	0	0	0	0	0	0	0	0	0	1	0	0	0	1	0	0	0	0	0	2	0	1	0	0	0	0	0	0
OTU_847	0	0	0	0	0	0	1	0	1	0	0	0	2	0	0	1	0	0	0	1	0	0	0	2	0	2	0	0	0	1	4	0	1	0	0	0	0	1	0	1	0	0	1	1	0	0	0	0	2
OTU_2174	0	1	0	0	0	0	0	0	0	0	0	0	0	0	0	0	0	0	0	1	0	0	1	0	0	0	0	0	0	0	0	0	0	1	0	0	0	0	0	0	0	0	0	0	0	0	0	0	0
OTU_663	2	0	0	0	1	3	2	0	1	0	0	0	7	1	0	0	3	0	0	1	0	0	1	0	0	1	1	0	0	0	0	2	0	0	0	0	0	0	0	3	0	0	0	0	1	0	0	1	0
OTU_1365	0	0	0	0	0	0	0	0	0	0	1	0	0	0	0	0	1	0	0	0	0	0	0	0	0	0	0	0	0	0	0	0	0	1	0	1	0	0	0	0	0	0	0	0	0	0	0	0	0
OTU_1541	0	0	0	1	0	0	1	0	0	0	0	0	0	0	0	1	1	0	1	0	0	1	0	0	0	2	0	0	0	0	0	0	0	0	0	0	0	0	0	0	0	0	0	0	0	0	1	0	0
OTU_1467	0	0	0	1	0	0	0	0	0	0	0	6	0	0	0	0	0	0	0	0	0	0	0	0	0	0	0	0	0	0	0	0	0	0	0	0	0	0	0	0	0	0	0	0	0	0	0	0	0
OTU_1807	0	4	1	0	0	0	0	1	0	0	0	0	0	0	0	3	0	0	0	0	0	0	0	0	0	0	0	0	0	1	0	0	0	0	0	0	0	0	0	0	0	0	0	0	2	0	0	1	0
OTU_1579	0	0	0	0	0	0	0	0	1	0	0	0	0	0	0	0	0	0	0	0	0	0	1	1	0	2	0	0	0	0	0	0	0	0	0	0	0	1	0	0	0	0	0	0	0	0	0	0	0
OTU_2478	0	1	3	0	0	0	0	1	0	0	0	0	0	0	0	1	0	0	1	1	1	1	0	0	0	1	0	0	1	0	0	0	0	0	0	0	0	0	0	0	0	0	0	0	0	0	0	1	0
OTU_1612	0	1	1	0	0	0	0	0	1	0	0	0	0	4	0	0	1	0	1	0	3	3	0	2	0	1	0	0	0	1	0	0	0	0	0	0	0	0	0	0	0	0	0	0	0	0	0	0	0
OTU_864	1	0	0	2	1	0	0	0	0	0	0	3	0	0	0	0	0	0	0	0	0	0	0	0	0	1	0	0	0	0	0	0	0	0	0	3	0	0	0	0	0	0	0	1	0	0	0	0	0
OTU_2125	0	1	0	1	0	0	0	0	0	0	0	0	0	0	0	0	0	0	0	0	0	0	0	0	0	0	0	0	0	0	0	0	0	0	0	0	0	0	0	0	0	0	0	0	0	0	0	0	0
OTU_1690	0	1	1	0	0	0	0	1	0	0	0	0	0	0	0	0	0	0	1	0	0	0	0	0	0	0	0	1	0	0	0	0	0	0	0	0	0	0	1	0	0	0	0	0	0	1	0	0	0
OTU_1542	0	0	0	0	0	0	0	0	0	0	0	0	0	0	0	0	0	0	0	0	0	0	0	0	0	0	0	1	0	0	0	0	0	0	0	0	0	1	0	0	0	0	0	0	0	0	0	0	2
OTU_2448	0	0	0	1	0	0	0	0	0	0	0	0	0	0	0	0	0	0	1	0	0	0	0	0	0	0	0	0	0	0	0	0	0	0	1	0	0	0	0	0	0	0	0	0	0	0	0	0	0
OTU_1740	0	0	0	0	0	0	0	0	0	0	0	0	0	0	0	0	3	0	0	0	0	0	0	0	0	0	0	1	0	0	0	0	0	0	0	0	0	0	0	0	0	0	0	0	0	0	0	1	0
OTU_1106	0	0	0	0	0	0	0	0	0	0	0	0	0	0	0	0	0	0	1	0	0	0	0	0	0	0	0	0	2	0	0	0	8	0	0	0	0	0	0	0	0	0	0	0	0	0	0	0	0
OTU_1009	0	0	8	0	0	0	0	0	0	0	0	0	0	0	0	0	0	0	0	1	0	1	0	0	0	0	0	0	0	0	0	0	0	0	0	0	0	0	0	0	0	0	0	0	0	0	0	1	2
OTU_435	0	1	0	1	2	0	1	0	0	0	1	3	0	2	0	1	3	0	0	0	2	0	0	0	0	4	1	0	0	0	1	0	0	1	0	1	3	2	1	0	0	0	0	0	0	1	1	0	0
OTU_1646	0	0	0	0	0	0	0	0	0	0	0	0	0	0	0	0	0	0	0	0	0	0	0	0	0	0	0	0	0	0	0	0	0	1	0	0	0	0	0	0	0	0	0	0	0	0	0	0	0
OTU_2433	0	0	0	0	0	0	0	3	0	0	0	0	0	1	0	0	0	0	0	0	0	0	0	0	0	0	0	0	0	0	0	0	0	0	0	0	0	0	0	0	0	0	0	0	0	0	0	0	0
OTU_1691	0	1	2	1	0	0	0	0	0	1	1	0	2	0	0	0	2	0	0	0	0	1	1	0	1	0	1	0	0	1	1	1	2	0	0	1	0	0	0	0	1	0	0	0	0	0	0	0	0
OTU_1513	0	0	0	0	0	0	0	0	1	0	0	0	2	0	3	0	0	0	1	1	4	0	0	1	0	0	1	0	0	0	0	0	0	0	0	1	0	0	0	0	1	0	0	1	0	1	0	1	0
OTU_1626	0	0	0	0	0	0	0	0	0	0	0	0	0	0	0	0	0	0	0	0	0	0	0	0	0	0	0	0	0	0	0	0	0	0	0	0	0	0	0	5	0	0	0	0	0	0	0	0	0
OTU_768	2	0	2	1	2	1	0	2	0	0	0	1	3	0	0	2	0	0	1	1	1	1	1	5	1	2	0	2	0	1	0	0	1	0	1	1	0	1	1	0	1	1	5	2	0	0	0	0	2
OTU_1232	0	1	1	0	0	0	0	0	0	0	0	0	3	0	0	3	0	0	1	0	0	2	1	0	0	0	1	0	0	0	0	0	1	0	1	0	0	0	0	0	1	0	0	0	0	0	0	0	1
OTU_347	0	3	2	0	2	3	1	2	1	1	0	0	0	1	0	0	2	0	1	0	0	3	1	4	0	1	4	0	0	1	0	1	0	0	1	0	1	12	1	0	2	0	2	0	1	0	1	2	0
OTU_2139	0	0	0	0	0	0	0	0	0	0	0	0	0	0	0	0	0	0	0	0	0	0	0	0	0	0	0	0	0	0	0	0	1	0	0	0	0	0	0	0	0	0	0	0	1	0	0	0	0
OTU_2112	0	1	1	0	0	0	0	0	0	0	0	0	0	0	0	1	0	0	0	0	0	0	0	0	0	1	0	0	0	0	0	0	0	0	0	0	0	0	0	1	0	0	0	0	0	0	0	0	0
OTU_2435	1	0	1	0	0	1	0	0	0	0	2	4	0	0	1	0	0	1	0	0	0	0	1	1	0	0	0	1	0	0	0	0	0	0	0	0	1	2	0	0	0	0	1	0	0	0	0	1	0
OTU_1729	0	1	0	1	0	0	0	2	0	0	0	0	0	0	0	0	0	0	0	0	0	0	0	0	0	0	0	0	1	0	0	0	0	0	0	0	0	0	0	0	0	4	0	0	0	0	0	0	0
OTU_1530	0	0	5	1	0	0	0	1	1	0	0	0	0	0	0	0	0	1	0	0	0	0	0	1	0	0	0	1	0	0	0	3	1	1	2	1	0	0	1	0	0	0	0	0	0	0	0	0	0
OTU_668	1	1	0	2	1	0	0	5	1	0	0	6	3	0	0	1	3	0	0	1	0	0	2	0	0	1	1	0	2	1	1	0	1	1	0	3	1	0	0	1	2	0	2	0	0	0	0	1	1
OTU_1764	0	0	0	0	0	0	0	0	0	0	0	0	0	0	0	0	0	0	1	1	0	1	0	0	0	0	0	0	0	0	0	0	0	1	0	0	0	0	0	0	1	0	0	0	0	3	0	0	1
OTU_947	3	0	0	1	0	1	0	0	0	0	0	1	0	0	0	0	2	1	0	0	0	0	0	0	0	0	0	0	0	0	0	0	0	0	0	1	0	1	0	1	0	0	0	0	0	0	1	1	0
OTU_1341	0	0	0	0	0	0	0	2	0	0	1	0	0	3	0	1	0	0	0	0	0	0	0	0	0	0	0	0	0	0	0	0	0	0	0	0	1	1	0	0	0	0	0	0	0	0	0	0	0
OTU_571	0	0	0	0	0	1	0	0	2	0	0	0	1	1	2	0	0	0	0	0	0	0	0	0	1	2	0	1	1	0	0	0	1	1	0	0	2	0	0	2	0	0	0	0	0	1	0	0	1
OTU_1284	0	2	0	0	0	0	0	0	0	2	0	0	0	1	0	0	0	0	0	0	0	0	0	0	0	0	0	1	0	0	0	0	0	0	0	0	0	0	0	1	0	0	0	0	0	1	0	0	0
OTU_2341	0	0	0	0	0	0	0	0	0	0	0	0	0	0	0	0	0	0	0	0	0	0	0	0	0	0	0	0	0	0	0	0	0	0	1	0	0	0	0	0	0	0	0	0	0	0	0	0	0
OTU_894	2	5	1	0	1	0	1	2	0	0	0	1	1	5	0	2	0	0	0	0	1	1	1	0	0	1	0	0	1	2	2	0	1	0	2	1	0	0	1	0	2	0	0	1	3	1	0	3	1
OTU_2253	0	0	0	0	0	0	0	0	0	1	0	0	0	0	0	0	0	0	0	0	0	0	0	0	0	0	0	3	0	1	0	0	0	1	0	0	0	0	0	0	0	1	0	0	0	0	0	0	0
OTU_962	0	1	0	0	1	0	0	0	1	0	0	0	0	1	0	0	1	0	0	0	0	0	2	0	1	0	0	1	0	1	0	0	0	0	1	2	0	1	1	0	0	0	0	3	0	0	0	0	0
OTU_709	0	0	0	0	0	0	0	0	0	0	0	7	1	2	0	0	0	0	0	0	0	0	0	0	0	0	0	1	1	0	0	0	0	0	0	0	0	0	1	0	0	0	0	0	0	1	0	0	0
OTU_1905	0	0	3	0	0	0	0	0	0	0	0	0	0	1	0	0	0	0	0	0	0	0	0	0	0	0	0	0	0	0	0	0	0	0	0	0	0	0	0	0	0	0	0	0	0	0	0	0	1
OTU_2231	2	0	1	0	0	0	0	0	1	0	0	1	0	0	0	0	0	0	3	0	0	0	0	0	2	0	1	1	0	0	0	0	0	0	0	0	1	1	0	1	0	0	2	1	0	1	1	0	0
OTU_1870	0	0	0	0	0	0	0	4	0	0	0	0	0	0	0	0	0	0	0	0	0	0	1	0	0	0	0	0	0	1	0	0	0	0	0	0	0	0	0	0	0	0	0	0	0	0	0	0	0
OTU_570	3	0	0	5	0	2	9	0	3	0	0	1	0	0	4	0	0	0	0	0	0	0	0	0	1	6	0	2	0	0	0	0	0	4	0	1	1	10	0	0	0	0	0	1	1	0	0	0	0
OTU_1023	1	0	0	0	0	0	0	0	0	0	0	0	0	0	4	0	0	0	0	0	0	0	0	0	0	0	0	0	0	0	0	0	0	0	0	0	1	0	0	0	0	0	0	0	0	0	0	0	0
OTU_2408	0	0	0	0	0	0	0	0	0	0	0	0	0	0	0	1	0	0	1	0	1	2	0	0	0	0	0	0	0	0	0	0	1	0	0	0	0	0	0	0	1	0	0	0	0	0	0	0	0
OTU_2457	0	0	0	0	0	1	0	0	0	0	0	0	0	0	0	0	0	0	0	0	0	0	0	0	0	0	0	0	0	0	0	0	0	0	0	0	0	0	0	0	0	0	0	0	0	0	0	0	0
OTU_2318	0	0	0	3	0	1	2	0	0	0	1	0	0	1	0	0	0	0	0	0	2	0	0	0	3	0	0	0	0	0	0	0	1	0	0	1	1	1	0	0	0	0	0	0	5	0	0	0	0
OTU_615	1	1	0	2	0	0	0	0	0	1	1	0	0	1	1	0	0	2	0	0	0	0	1	2	2	4	0	0	2	0	0	1	0	0	2	0	1	0	0	0	0	0	0	3	1	0	0	0	3
OTU_1874	0	0	0	0	0	0	0	0	0	0	0	1	0	0	0	0	0	1	0	0	0	1	0	1	0	0	0	0	0	0	0	1	1	0	0	0	0	0	0	0	0	0	0	0	0	0	0	0	0
OTU_2064	0	0	0	0	0	0	0	0	1	0	0	0	0	0	0	0	0	0	0	0	0	0	0	0	2	0	0	0	0	0	0	0	0	0	0	0	2	0	0	0	0	0	0	0	1	0	0	0	0
OTU_1923	0	1	1	1	0	0	0	0	0	0	0	0	0	0	0	0	0	0	0	0	0	0	0	0	0	2	0	0	0	0	0	0	0	0	0	0	0	0	0	0	0	0	1	0	0	0	0	0	0
OTU_2097	1	0	0	1	1	0	1	2	1	0	1	0	0	0	0	3	0	0	0	2	0	0	2	0	0	5	0	1	0	1	0	0	0	0	0	0	1	0	1	0	0	0	0	0	1	0	0	0	1
OTU_1588	0	0	1	0	0	0	0	0	0	0	0	0	0	0	6	0	0	0	0	0	0	0	0	0	0	0	0	0	0	0	0	0	0	0	0	0	0	0	1	0	0	0	0	0	0	0	0	0	0
OTU_1124	1	0	0	0	0	0	0	0	0	0	1	0	2	1	0	1	0	0	0	0	0	0	0	1	1	0	0	2	0	0	0	1	0	0	0	1	0	0	1	0	1	0	0	0	0	0	0	0	0
OTU_1055	0	0	0	2	0	0	0	0	1	1	0	0	0	0	0	0	1	1	0	1	0	0	0	0	0	0	0	1	0	0	0	0	0	0	0	0	0	3	0	0	0	2	0	0	0	1	0	0	0
OTU_1793	0	0	0	2	1	0	1	0	0	0	0	1	0	0	0	0	0	0	0	0	0	0	0	0	1	0	0	1	0	0	0	0	0	0	0	0	1	1	0	3	1	0	0	2	0	1	0	0	0
OTU_1582	0	0	0	2	0	0	0	0	0	0	0	0	0	0	0	0	0	0	0	0	0	0	0	0	0	1	0	0	0	0	0	0	0	0	0	0	0	0	0	0	0	0	0	0	0	0	0	0	0
OTU_2043	0	1	0	0	0	1	0	0	0	0	0	0	0	0	0	0	0	0	0	0	1	0	0	1	0	0	1	0	0	0	0	1	0	0	0	0	0	0	0	0	1	1	0	0	0	0	0	2	0
OTU_2427	0	1	0	0	0	0	1	0	0	0	0	0	0	0	0	0	0	0	0	0	0	0	0	0	0	0	0	0	0	0	0	0	0	0	0	0	0	0	0	0	0	0	0	0	0	0	0	1	0
OTU_2555	0	0	0	0	0	0	0	0	0	0	0	0	0	0	0	0	0	0	0	0	0	0	0	0	0	0	0	0	0	0	0	0	0	0	0	0	0	0	0	0	0	0	0	0	0	0	0	0	0
OTU_1948	0	0	0	0	1	0	0	1	0	0	0	0	0	0	0	0	0	0	0	0	0	0	1	0	0	1	0	0	0	0	1	2	0	0	0	0	1	0	1	0	0	0	0	0	0	1	0	0	0
OTU_1304	0	0	0	5	0	0	0	1	0	0	0	0	2	1	0	0	0	0	0	0	0	0	0	0	3	0	0	0	0	0	0	0	1	0	0	0	1	0	1	0	0	0	0	0	1	0	0	0	1
OTU_1913	0	5	0	0	0	0	0	0	1	0	0	0	0	0	0	0	0	0	0	0	0	0	0	0	0	0	0	0	0	0	1	0	0	0	1	0	1	0	0	0	0	0	0	0	0	0	0	0	1
OTU_1765	1	1	0	5	0	0	0	0	0	0	0	1	0	1	0	2	0	0	0	1	0	0	0	0	1	0	0	0	0	0	0	0	0	0	0	0	0	0	0	0	0	0	0	0	0	0	2	0	0
OTU_809	0	1	0	0	1	0	0	0	0	0	0	0	0	0	0	0	6	0	0	0	0	0	0	2	0	0	0	0	0	1	0	0	1	0	0	1	0	0	0	0	0	3	0	0	0	0	0	0	0
OTU_1286	0	0	0	0	0	0	0	0	0	0	0	0	0	0	0	0	0	0	0	0	0	0	0	0	0	0	0	0	0	0	0	0	0	0	0	0	0	0	0	0	0	4	0	3	0	0	0	0	0
OTU_1479	0	0	1	0	0	0	0	0	0	0	1	0	0	3	0	0	0	0	0	0	0	0	0	0	0	0	1	0	0	0	0	0	0	0	0	0	0	0	0	0	0	0	0	0	0	0	0	0	0
OTU_2414	0	0	0	0	0	0	0	0	0	0	0	0	0	0	0	0	0	0	0	0	0	0	0	0	0	0	0	0	0	0	0	0	3	0	0	0	0	0	0	0	0	0	0	0	0	0	0	0	0
OTU_2009	0	0	0	0	0	0	0	2	0	0	0	0	0	0	0	0	0	0	0	0	0	0	0	0	0	0	0	0	0	0	0	0	0	0	0	0	0	0	0	0	0	0	0	0	0	0	1	0	0
OTU_1668	0	1	0	0	0	0	0	0	1	0	0	0	0	0	0	0	0	0	0	0	1	0	0	0	1	4	0	0	0	1	0	0	0	0	0	0	0	0	0	0	0	0	0	0	0	0	0	0	0
OTU_2210	0	0	0	0	0	0	0	0	0	0	1	0	0	0	0	0	0	0	0	0	0	0	0	0	0	0	0	0	0	0	0	0	0	0	0	0	0	0	0	0	0	0	0	0	0	0	0	0	0
OTU_1689	0	0	1	0	0	0	0	0	0	0	0	0	1	0	1	0	3	0	0	0	0	0	0	1	0	0	0	1	0	0	1	0	0	0	0	0	0	0	0	0	0	0	0	0	0	0	0	0	0
OTU_626	0	0	0	1	0	0	1	0	0	0	0	1	0	0	0	0	0	3	0	0	0	0	0	3	1	0	0	0	1	0	0	0	0	0	0	1	1	4	4	0	0	0	0	3	1	0	1	0	0
OTU_1434	0	0	0	0	0	0	0	0	0	0	0	0	0	0	0	0	0	0	0	0	0	1	0	0	0	0	0	0	0	0	0	0	0	1	0	0	1	0	0	0	0	0	0	0	0	0	0	0	0
OTU_1487	1	1	3	0	0	0	0	0	1	0	0	1	0	0	0	0	0	2	0	0	3	0	0	0	0	0	0	0	0	0	1	0	0	1	0	0	0	0	0	0	2	0	0	0	0	0	0	0	1
OTU_1168	0	1	0	0	0	0	0	0	0	0	1	0	0	0	0	0	0	0	1	1	0	0	0	1	0	0	0	0	0	0	0	0	0	0	1	0	0	0	0	0	0	0	0	0	0	0	0	1	0
OTU_2055	0	1	0	0	0	0	2	1	2	0	0	0	0	0	0	0	0	0	0	0	0	0	0	0	0	0	0	0	1	0	0	0	0	0	0	0	0	1	0	0	0	0	0	0	0	3	1	0	0
OTU_1634	0	4	0	0	0	1	0	0	0	0	3	1	0	1	0	0	0	0	0	0	0	0	0	0	0	1	0	0	0	0	0	0	0	0	0	0	0	0	2	0	0	0	0	0	0	2	0	0	0
OTU_1933	0	1	0	0	0	0	0	0	0	1	0	0	0	0	0	0	0	1	0	0	0	0	0	0	0	0	0	0	0	1	0	0	0	0	0	0	0	1	0	0	0	0	0	3	2	0	0	0	0
OTU_1828	0	1	0	0	1	0	0	0	0	0	0	1	0	1	0	1	0	0	1	0	0	0	0	1	0	1	1	0	0	1	0	0	0	1	0	0	0	0	0	0	0	0	0	0	1	1	0	0	0
OTU_1021	0	5	0	0	0	0	0	4	0	0	0	0	3	0	0	0	1	0	0	1	2	1	0	0	0	0	0	1	0	0	3	0	0	0	1	0	0	0	0	0	0	0	0	0	0	0	0	0	0
OTU_1604	0	1	3	0	0	0	0	0	0	0	0	0	1	0	0	1	1	0	0	0	0	2	0	0	1	1	0	0	0	1	0	1	0	0	0	0	1	0	0	2	0	0	1	1	1	0	0	0	1
OTU_2030	0	0	0	0	0	0	0	0	0	0	0	0	0	0	0	0	0	0	0	0	0	0	0	0	0	0	0	0	0	0	1	0	0	0	0	0	0	0	0	0	0	0	0	0	0	0	0	0	0
OTU_1153	1	0	1	4	0	0	0	1	0	1	0	0	1	2	0	2	0	0	0	0	0	1	2	0	1	0	0	1	0	0	0	0	0	0	0	0	2	0	8	0	0	0	3	1	1	0	1	1	0
OTU_900	1	0	0	0	0	0	2	1	0	0	3	0	0	1	0	1	0	0	0	0	0	0	0	0	1	0	0	0	0	0	0	0	0	0	0	0	1	0	2	0	0	2	1	0	1	0	0	1	1
OTU_1225	0	0	1	0	0	0	0	1	2	1	0	0	0	1	0	0	1	0	0	0	0	0	0	0	0	1	0	0	1	1	0	0	0	0	0	0	1	0	1	0	0	0	1	0	1	0	0	0	0
OTU_1535	0	0	0	0	0	1	0	0	0	0	0	1	0	0	0	0	0	0	0	0	0	0	0	0	2	1	0	0	0	0	0	0	0	0	0	0	0	0	0	0	2	0	0	0	0	0	0	0	0
OTU_2120	0	0	0	0	0	0	0	0	0	0	0	0	0	0	0	0	0	0	1	0	0	1	0	0	0	0	0	0	0	0	0	0	0	0	0	0	0	0	0	0	0	0	0	0	0	0	0	0	0
OTU_979	0	1	0	0	3	1	0	0	0	0	1	0	0	0	0	0	0	0	0	0	0	0	0	0	0	0	0	0	0	0	1	0	1	0	0	0	0	0	0	0	0	0	0	0	0	0	0	0	0
OTU_1732	0	1	0	0	0	0	0	0	0	0	0	0	2	0	0	0	0	0	0	1	0	0	0	0	0	0	0	0	0	0	0	0	0	0	0	0	0	0	0	0	0	0	0	0	0	0	0	0	0
OTU_973	7	0	0	1	0	1	1	1	1	0	2	0	0	0	0	0	2	0	0	2	2	0	0	0	2	0	0	1	0	0	0	1	1	0	2	1	0	0	0	0	1	0	1	1	0	0	0	0	2
OTU_785	1	0	0	0	0	0	0	0	0	1	0	0	0	0	0	0	0	0	0	0	0	0	0	0	1	0	0	0	1	0	0	0	1	0	0	0	2	1	0	1	0	0	0	0	0	0	0	0	0
OTU_509	1	1	0	0	0	1	0	0	2	1	0	0	0	0	0	0	0	1	0	0	0	0	0	0	0	0	0	3	0	0	0	0	0	4	0	0	1	0	0	0	0	6	0	0	0	0	1	0	0
OTU_1830	0	0	1	0	0	0	0	0	0	0	0	2	0	0	0	0	0	0	1	0	0	0	0	0	0	0	0	0	0	0	0	0	0	0	0	0	0	0	0	0	0	0	0	0	0	0	0	0	0
OTU_1302	1	0	1	0	0	0	0	0	0	0	0	0	0	0	0	0	1	0	0	0	0	1	0	0	1	0	0	0	1	0	0	0	0	0	0	1	0	0	0	0	0	0	0	0	1	0	0	0	1
OTU_820	0	0	0	0	0	0	0	0	0	0	0	0	0	0	0	0	0	0	0	0	0	0	0	0	0	1	0	1	0	0	0	0	0	0	0	1	0	0	0	0	0	0	0	0	5	0	1	0	0
OTU_748	0	0	1	0	0	0	0	0	0	0	0	0	2	1	0	2	4	0	0	1	0	1	0	0	0	0	7	1	0	0	1	0	0	0	7	0	0	0	0	0	1	0	0	0	0	0	0	3	8
OTU_1788	0	0	0	0	0	0	0	0	1	0	0	0	1	0	0	1	2	0	0	0	0	0	0	0	0	0	0	0	0	0	0	0	0	0	0	0	0	0	2	0	0	0	0	0	0	0	0	0	0
OTU_892	0	0	0	0	0	1	0	0	0	0	1	1	0	0	1	0	0	0	0	0	0	0	0	0	0	0	0	0	1	0	0	0	0	1	0	4	0	0	0	0	0	0	0	0	0	0	0	0	0
OTU_2118	0	0	0	1	0	0	0	0	1	0	0	0	1	1	0	0	0	0	0	0	1	0	1	0	0	0	0	0	0	0	0	0	0	0	0	0	0	0	0	0	0	1	0	0	0	0	0	1	0
OTU_1285	0	0	0	0	0	0	1	0	0	0	0	3	0	0	0	0	0	0	0	0	0	0	0	0	0	1	0	0	0	0	0	0	0	0	0	0	0	0	0	0	0	0	0	0	0	0	0	0	0
OTU_2194	0	0	2	0	0	0	0	0	0	0	0	0	0	0	0	1	0	0	0	0	0	2	0	0	0	0	0	0	0	0	0	0	0	0	1	0	0	0	0	0	0	0	3	0	0	0	0	0	2
OTU_2238	0	0	1	0	0	0	0	0	0	0	0	0	0	0	0	2	0	0	0	0	0	3	0	0	0	0	0	0	0	0	0	0	0	0	0	0	0	0	0	0	0	0	0	0	0	0	0	0	0
OTU_1073	0	4	4	2	2	1	0	1	1	0	1	0	1	0	0	0	1	0	0	0	0	1	0	2	0	1	1	1	1	0	0	0	0	1	1	3	0	0	0	0	1	2	0	1	1	0	0	0	1
OTU_2504	0	0	0	0	0	0	0	0	0	0	0	0	0	0	0	0	0	0	0	0	0	0	0	0	0	0	0	0	0	0	0	0	2	0	2	0	0	0	0	0	1	0	0	0	0	0	0	0	0
OTU_2123	0	0	0	0	0	0	0	1	0	0	0	0	0	0	0	0	1	0	0	0	0	0	0	0	0	0	0	0	0	0	0	0	1	0	0	1	0	0	0	0	0	0	0	0	0	0	0	0	0
OTU_1446	0	0	0	0	0	1	0	0	0	0	0	0	0	0	0	0	0	0	0	0	0	0	0	0	0	0	0	0	0	0	0	0	0	0	0	0	0	0	0	1	0	0	0	0	0	0	1	1	1
OTU_2417	0	0	0	0	0	0	0	0	1	0	0	0	0	0	0	0	0	0	0	0	0	0	0	0	0	0	0	0	0	0	0	0	0	0	0	0	0	0	0	0	0	0	0	0	0	0	0	0	0
OTU_2418	0	0	0	0	0	0	0	0	0	0	0	1	0	1	0	0	1	0	0	0	0	0	0	0	0	1	0	0	0	1	0	0	0	0	0	0	1	0	1	0	0	0	0	0	0	0	0	0	0
OTU_2447	0	0	0	0	1	0	0	0	0	3	0	1	0	0	0	0	0	0	0	0	0	0	0	0	0	1	0	0	0	0	0	0	0	0	1	0	0	0	1	0	1	0	1	1	0	0	0	0	0
OTU_479	0	1	5	0	0	0	0	1	2	1	1	0	0	1	0	4	0	1	0	0	0	0	0	0	1	0	0	0	0	0	0	1	0	0	0	0	0	1	0	1	0	1	1	0	0	0	0	0	4
OTU_2268	0	0	0	0	0	0	0	1	0	0	0	1	0	0	0	0	0	0	0	0	0	0	0	0	1	0	0	1	0	0	0	0	0	0	0	0	0	0	0	0	0	0	0	0	0	0	0	0	0
OTU_1096	0	1	0	0	0	0	0	0	0	1	0	3	0	1	0	1	0	0	0	1	0	0	0	1	0	1	0	0	1	0	0	0	0	0	1	1	4	1	0	0	0	0	0	0	0	0	0	0	1
OTU_2451	0	0	0	0	0	0	0	0	0	0	0	0	0	0	0	0	0	0	0	0	0	0	0	0	0	0	0	0	0	0	0	0	1	0	0	0	0	0	0	0	1	0	1	0	0	0	0	0	0
OTU_1554	0	0	1	1	0	0	0	0	0	2	0	1	0	0	0	0	0	0	2	0	0	0	0	0	0	0	0	0	0	0	0	1	0	0	0	0	0	0	0	0	0	0	0	0	0	0	0	0	0
OTU_1374	0	1	0	0	0	1	0	0	0	0	0	0	0	0	0	0	0	0	0	0	0	0	0	0	0	0	0	0	0	0	0	0	0	0	0	0	1	0	1	0	0	1	0	1	0	0	0	0	0
OTU_1558	0	0	0	0	0	0	0	0	0	0	0	0	0	2	0	0	0	0	0	0	1	0	0	0	0	0	0	1	0	1	1	0	2	0	0	1	0	1	0	0	0	0	0	0	0	1	0	1	0
OTU_1098	0	0	0	0	0	0	1	0	0	0	0	0	0	0	0	0	0	0	0	0	0	0	0	0	1	0	0	0	0	0	0	0	0	0	0	0	0	4	0	0	0	0	0	0	0	0	0	0	0
OTU_1944	0	1	0	0	1	0	0	0	0	0	0	0	0	0	0	0	0	0	0	0	0	0	0	0	0	0	0	0	0	0	0	0	0	0	0	0	3	0	0	1	0	0	0	0	0	0	0	0	0
OTU_2202	0	1	0	2	0	0	0	0	0	0	0	1	0	0	0	0	0	0	0	0	0	0	0	0	0	1	0	0	0	0	0	0	0	0	0	3	0	0	0	0	0	0	0	0	0	0	0	0	1
OTU_1361	0	0	0	0	0	0	0	0	0	0	0	0	0	0	0	0	0	0	0	0	0	0	0	0	0	0	0	0	0	0	0	0	0	0	0	0	0	0	0	0	0	1	0	0	0	0	0	0	0
OTU_1440	0	0	0	0	0	0	0	0	0	0	0	0	0	0	0	0	0	0	0	0	0	0	0	0	0	0	0	0	0	0	0	1	0	0	0	0	0	6	0	0	0	0	0	1	0	1	0	0	0
OTU_939	0	1	2	1	0	0	0	0	1	0	0	2	0	0	0	0	0	0	0	0	0	0	0	0	0	1	1	0	0	0	0	0	0	0	0	0	1	0	0	0	0	0	0	0	0	0	0	0	0
OTU_1648	0	1	1	0	1	0	0	0	0	0	0	0	0	0	0	0	0	0	0	0	0	0	0	0	0	0	0	0	0	0	1	0	0	0	0	0	0	1	0	0	0	0	0	0	0	0	0	0	0
OTU_1303	0	0	0	0	0	0	0	0	0	0	0	0	0	0	0	1	0	0	1	0	0	2	0	0	1	0	0	0	0	0	0	0	0	0	0	0	0	0	1	1	0	0	0	0	0	0	0	0	6
OTU_2551	0	1	1	0	0	0	0	1	1	0	0	0	0	0	0	0	0	0	0	0	0	0	0	0	0	1	0	0	0	1	0	0	0	0	0	0	1	0	0	0	0	1	0	0	0	0	0	0	0
OTU_872	0	0	0	4	0	0	0	0	0	0	2	0	0	0	0	0	1	0	0	0	0	1	0	0	1	2	1	1	0	0	2	0	0	0	0	0	0	0	0	0	0	0	0	0	1	1	0	0	0
OTU_1947	0	2	1	0	0	0	0	0	0	1	0	0	0	1	0	0	0	1	0	0	0	0	0	0	0	0	0	0	0	0	1	0	0	0	0	0	0	2	1	0	0	0	0	0	0	0	0	0	0
OTU_1111	0	0	1	0	0	0	1	0	0	0	1	0	0	0	1	0	0	1	0	0	0	0	0	1	0	3	0	1	1	0	0	0	0	0	0	0	0	0	0	0	0	0	0	0	0	1	0	0	0
OTU_1123	0	0	0	1	0	0	0	0	0	0	0	0	0	0	0	0	0	0	0	0	0	0	0	0	1	1	0	3	0	0	0	0	1	0	0	0	0	1	0	0	1	0	0	0	0	0	0	0	0
OTU_1099	0	1	1	0	2	3	0	0	1	1	0	3	0	3	1	0	0	0	2	3	0	0	2	3	1	1	0	0	0	1	0	0	1	1	0	0	0	0	0	2	0	0	1	1	0	0	0	1	1
OTU_1789	0	0	0	0	0	0	1	0	0	0	0	0	0	0	0	0	0	1	0	0	0	0	0	0	0	0	0	0	0	1	0	0	0	1	0	0	0	0	0	0	0	0	0	0	0	0	0	0	0
OTU_2437	0	0	0	0	0	0	0	1	1	0	0	1	0	0	0	0	1	0	0	0	1	0	0	0	0	1	0	0	0	0	0	0	0	1	0	0	0	0	0	2	1	0	0	2	1	0	0	0	0
OTU_2279	0	0	0	0	0	0	1	0	0	0	0	1	0	0	0	0	0	0	0	0	0	0	0	0	0	0	0	3	0	0	0	0	0	0	0	0	0	0	0	0	0	0	0	0	0	0	0	0	0
OTU_1776	0	0	0	0	1	0	0	0	2	0	0	2	0	0	0	1	1	0	0	1	0	0	0	0	0	1	0	0	1	0	0	0	0	0	0	0	0	1	0	0	0	0	0	0	0	1	0	0	0
OTU_2363	1	0	0	0	0	1	0	0	0	0	0	0	0	0	1	0	0	0	0	0	0	0	0	0	0	0	0	0	0	0	0	0	0	0	0	0	0	0	0	0	0	0	0	0	0	0	0	0	0
OTU_1533	1	0	0	0	0	0	0	0	0	0	1	0	0	0	0	1	2	0	0	0	0	4	0	0	0	0	0	1	0	0	0	0	0	0	0	0	0	0	0	1	0	0	1	0	0	0	0	0	0
OTU_622	0	1	0	0	2	0	0	0	0	1	0	2	0	0	0	0	0	0	1	1	0	0	0	0	1	2	2	1	1	0	0	2	0	0	0	1	1	0	1	0	0	0	0	0	1	2	1	1	0
OTU_1591	1	1	0	0	0	0	0	0	0	0	0	0	6	0	0	0	0	0	1	0	0	0	0	0	0	0	0	0	0	0	0	0	0	0	0	1	0	0	0	0	0	0	0	0	0	0	0	0	1
OTU_1575	1	0	0	0	0	0	0	0	0	0	0	0	0	0	0	0	0	1	0	0	0	0	0	0	0	0	0	1	0	0	0	0	0	1	0	0	0	0	0	0	0	0	0	0	0	0	0	0	0
OTU_2130	0	0	0	0	0	0	0	0	0	0	0	0	0	0	0	0	0	0	0	0	0	0	0	0	0	0	0	0	0	0	0	0	0	0	0	1	0	0	0	0	0	0	0	1	1	1	0	0	0
OTU_921	0	0	0	1	0	0	1	0	1	0	0	0	0	0	0	0	0	2	0	0	0	0	0	0	0	0	0	0	0	0	0	0	0	0	0	7	0	0	0	0	0	0	0	0	0	0	0	0	0
OTU_1529	0	0	0	0	0	0	0	0	0	0	0	0	0	0	0	0	0	0	0	2	1	0	0	0	0	0	0	0	0	0	0	0	0	0	0	0	0	0	0	0	1	0	3	0	0	0	0	1	0
OTU_1191	1	0	0	2	0	0	1	0	0	0	0	0	3	0	0	0	0	0	0	0	0	0	0	0	0	0	0	1	0	0	0	0	0	0	0	2	0	0	0	0	0	0	0	1	0	0	0	0	0
OTU_1562	0	0	0	2	0	0	0	0	0	0	0	0	0	0	0	0	0	0	0	0	0	0	0	1	0	1	0	1	0	1	0	0	0	0	0	0	0	1	0	0	0	0	0	0	0	0	0	1	0
OTU_1218	1	0	1	0	0	0	1	0	0	0	1	0	0	0	0	0	0	1	0	0	1	0	1	0	0	0	1	0	0	0	0	2	0	0	0	0	0	0	1	0	1	0	0	0	0	1	1	0	2
OTU_2008	0	0	1	0	0	0	0	0	0	0	0	0	0	0	0	0	0	0	0	0	0	1	0	1	0	0	0	0	0	1	0	1	1	0	0	0	0	0	0	0	0	0	0	0	0	0	0	0	0
OTU_967	0	0	0	0	0	0	0	0	0	0	0	1	0	0	0	0	0	1	0	0	0	0	0	0	10	0	0	0	1	0	0	0	0	0	0	0	3	0	0	0	0	0	0	0	0	0	0	0	2
OTU_1608	0	0	1	0	0	0	0	0	0	0	0	0	0	1	0	0	0	0	0	0	0	0	0	0	0	0	0	0	1	0	0	0	0	0	2	0	0	0	0	0	0	0	0	0	0	0	0	1	1
OTU_1067	0	0	0	0	0	0	0	0	0	0	0	0	0	0	0	0	1	0	0	0	0	0	0	0	0	1	0	0	0	0	0	0	0	0	0	0	0	0	0	0	0	0	0	0	0	1	0	0	0
OTU_1357	0	0	3	0	0	0	0	0	0	0	0	0	0	1	1	0	0	0	0	0	0	0	0	0	0	0	0	0	0	1	0	0	0	0	0	0	0	0	0	1	0	0	0	1	0	0	0	0	0
OTU_1980	0	0	0	1	0	0	0	0	0	0	0	0	0	0	0	0	0	0	0	1	0	0	0	0	2	0	0	0	0	0	0	0	0	0	0	0	0	1	0	1	0	0	0	1	1	1	1	1	0
OTU_1307	0	0	1	0	0	2	1	0	0	1	0	0	0	2	0	0	0	0	0	0	0	0	1	0	1	2	0	0	0	1	1	1	1	0	0	2	1	0	0	0	0	0	0	0	0	0	1	0	0
OTU_223	0	0	0	0	0	0	0	0	0	0	0	0	0	0	0	0	0	0	0	0	0	0	0	0	1	0	0	0	0	0	0	0	1	0	0	0	0	0	0	0	0	0	0	0	74	0	0	0	0
OTU_1118	0	0	1	0	1	0	0	0	0	0	0	0	1	3	0	0	0	0	0	0	0	0	0	0	1	1	0	0	0	0	0	0	0	0	0	0	1	1	0	0	0	0	0	0	0	1	0	0	0
OTU_2000	0	0	0	0	0	0	0	0	0	0	0	1	0	0	0	0	0	0	0	0	0	0	2	0	0	1	0	0	0	0	0	0	0	0	0	0	0	0	0	0	0	0	0	0	0	0	0	0	0
OTU_2275	0	0	0	0	0	0	4	0	0	0	0	0	0	0	0	0	0	1	0	0	0	0	0	0	0	0	0	0	0	0	0	0	0	1	0	0	0	0	0	0	0	0	0	0	0	0	0	0	0
OTU_556	0	2	0	0	0	1	0	0	1	0	0	0	0	1	0	0	0	6	0	0	0	0	0	1	0	0	0	0	1	1	0	0	0	0	0	0	0	0	0	2	0	0	1	0	1	0	0	0	3
OTU_1438	0	0	0	0	0	0	1	1	1	0	0	0	0	1	1	0	0	0	0	1	0	1	0	0	0	0	1	0	0	0	0	1	0	0	1	0	0	0	0	0	0	0	0	0	0	0	0	0	0
OTU_1468	0	0	2	0	0	0	0	0	8	0	0	0	0	0	0	0	0	0	0	0	0	0	0	0	0	0	0	0	0	0	0	0	0	0	0	0	0	0	0	0	0	0	0	0	0	1	0	0	0
OTU_1380	0	0	0	0	0	0	0	0	0	0	0	0	0	0	0	0	0	0	0	0	0	0	0	0	0	0	0	0	0	0	0	0	0	1	0	0	0	0	0	0	0	0	0	0	0	0	0	0	0
OTU_953	0	0	0	0	0	0	0	1	0	0	0	1	0	0	0	0	0	0	0	0	0	0	0	0	2	1	0	0	0	0	0	2	0	0	0	0	0	0	0	0	0	0	0	0	0	0	0	0	0
OTU_1471	0	1	0	0	0	0	0	0	0	0	1	0	0	0	0	0	0	0	0	0	0	0	0	0	0	0	0	0	0	0	0	0	0	0	0	0	0	0	0	0	0	1	0	0	1	0	0	0	1
OTU_1687	0	0	0	1	0	0	0	0	0	0	0	1	0	0	0	0	0	0	0	0	0	0	0	0	0	0	1	0	0	0	0	0	0	0	0	0	0	0	0	0	0	0	0	0	0	0	0	0	0
OTU_1801	0	1	0	0	0	0	0	0	0	0	0	0	0	1	0	0	0	0	0	0	1	0	0	0	0	1	1	0	0	0	0	0	0	0	0	1	0	0	0	0	1	0	0	0	0	0	0	0	0
OTU_1092	0	0	0	0	0	0	0	1	0	0	0	0	3	0	0	0	1	0	0	0	0	0	0	0	0	0	0	0	0	0	0	0	0	0	0	0	0	0	0	0	2	0	1	0	0	0	0	0	0
OTU_923	0	1	1	0	0	1	2	0	0	0	0	1	0	1	0	1	0	0	0	0	0	0	2	0	0	1	0	0	0	0	0	0	0	0	0	0	0	0	1	0	0	0	0	0	0	0	0	0	1
OTU_1101	0	0	0	0	0	0	0	0	0	0	0	0	0	0	0	0	0	0	0	1	0	0	1	0	0	1	1	0	0	0	0	0	0	1	0	0	0	0	0	0	0	0	0	0	0	0	0	0	0
OTU_692	0	0	1	0	0	0	0	0	0	0	0	0	0	0	0	0	0	0	0	0	5	0	0	0	0	0	1	0	0	0	0	0	1	1	0	1	0	0	0	0	0	1	1	0	0	3	0	0	0
OTU_1463	0	0	0	0	0	0	0	0	0	1	0	0	0	1	0	0	0	0	0	0	0	0	0	0	0	0	0	0	0	1	0	0	0	0	0	0	2	0	0	0	0	0	0	0	0	0	0	0	0
OTU_742	0	1	0	4	2	0	0	0	1	0	0	0	0	0	1	0	0	0	0	0	0	0	0	0	1	2	0	0	0	0	0	0	0	0	0	0	0	0	0	1	0	0	0	0	1	1	0	0	0
OTU_1121	0	0	1	0	0	0	0	1	0	0	0	0	0	0	0	2	0	0	1	0	1	0	0	0	0	0	0	0	0	0	0	0	1	0	0	0	0	0	4	0	0	0	0	0	0	0	0	0	1
OTU_909	0	0	1	1	0	0	1	0	0	0	1	0	0	0	0	0	0	0	0	0	0	0	0	0	0	2	0	0	1	0	0	0	0	0	0	0	0	1	0	0	0	0	0	0	0	1	0	0	0
OTU_1924	0	0	0	0	0	1	1	0	0	1	0	0	0	1	1	0	0	0	0	1	0	0	0	0	0	1	4	0	0	0	1	0	0	0	0	0	0	0	0	0	0	1	0	0	0	0	0	0	0
OTU_803	0	0	0	0	1	0	0	0	0	0	0	1	0	0	0	0	0	0	0	0	0	0	0	0	0	0	2	1	0	0	0	0	0	0	0	0	1	0	0	0	0	0	0	0	0	0	0	1	0
OTU_1978	0	1	2	2	0	0	0	0	0	0	0	0	0	0	0	0	0	0	0	1	0	0	0	0	0	0	0	0	0	0	2	0	0	0	1	0	0	0	0	0	1	2	0	1	0	0	0	0	0
OTU_1659	0	1	0	0	0	0	1	0	0	0	0	0	0	0	0	0	0	0	0	0	0	0	1	0	0	1	0	0	0	1	0	0	0	0	0	0	1	0	0	0	0	0	0	0	0	1	3	0	0
OTU_1773	0	0	1	0	0	0	1	0	0	0	0	0	0	0	0	0	0	0	0	0	0	3	0	0	0	0	0	0	0	0	0	0	1	0	0	0	0	1	0	0	0	0	0	0	0	0	0	0	2
OTU_1553	0	0	0	5	0	0	0	0	0	0	0	0	0	0	0	0	0	0	0	0	0	0	0	0	0	0	0	0	0	0	0	0	0	1	0	0	0	0	0	0	0	0	0	0	0	0	0	0	0
OTU_1318	0	0	0	0	0	0	0	0	0	0	0	0	0	0	0	0	0	0	0	0	0	0	0	0	0	4	0	0	0	0	0	0	0	0	0	0	0	1	0	0	0	0	0	1	3	0	0	0	0
OTU_1240	0	0	1	0	0	1	0	0	0	0	1	0	1	1	0	0	0	0	0	0	0	0	0	0	0	0	0	0	0	1	0	0	0	0	0	0	0	0	1	0	0	1	0	0	0	0	0	0	0
OTU_1720	0	0	0	0	0	0	0	0	0	0	0	0	0	0	0	0	0	0	0	0	0	0	0	0	0	0	0	0	0	0	0	0	0	0	0	0	0	0	0	4	0	0	0	0	0	0	0	0	0
OTU_2485	0	1	1	0	0	0	0	0	0	1	0	0	0	0	0	0	0	0	0	0	0	0	0	0	0	0	0	0	0	1	0	0	1	0	0	0	0	0	0	0	0	0	0	0	0	0	0	0	0
OTU_2396	0	0	1	0	0	1	0	0	0	0	0	0	0	0	0	0	1	0	0	0	0	0	3	0	0	2	0	0	0	0	1	0	0	0	0	0	0	0	0	0	0	0	0	0	0	0	0	0	0
OTU_1507	0	0	0	0	1	0	0	0	0	0	0	0	0	0	1	0	0	0	0	0	0	0	0	0	0	0	0	0	0	0	0	1	0	0	0	0	2	0	0	0	0	0	0	0	1	1	0	0	0
OTU_1671	1	0	0	0	0	0	0	0	0	2	0	0	0	0	0	0	0	0	0	0	0	1	0	0	0	0	0	0	0	0	0	0	0	0	0	0	0	0	0	0	0	0	0	1	0	0	0	0	1
OTU_2400	0	0	0	0	0	0	0	0	0	0	0	0	0	0	0	1	3	0	0	0	0	0	0	1	0	1	0	0	0	1	0	0	0	0	0	0	0	0	0	0	0	0	0	0	0	0	0	0	0
OTU_966	0	0	0	1	0	0	0	1	0	0	0	0	0	0	1	0	0	0	0	0	0	0	1	0	0	0	0	0	0	0	0	0	0	1	0	0	0	0	0	0	0	0	0	0	0	0	0	0	0
OTU_2215	0	0	0	0	0	0	0	0	0	0	0	0	0	0	0	0	0	0	0	0	0	0	0	0	0	0	0	0	0	0	0	0	0	0	0	0	0	0	0	0	0	0	0	1	0	0	0	0	0
OTU_1105	0	1	0	2	0	1	1	0	0	0	0	0	0	1	0	0	0	0	0	0	0	0	0	0	0	3	0	2	0	0	0	0	0	0	0	0	0	0	0	0	0	0	0	1	0	0	0	0	0
OTU_1288	0	0	1	0	0	0	0	0	0	0	0	0	0	0	0	0	0	0	0	1	0	1	1	0	0	0	0	0	0	0	0	0	0	0	1	0	0	0	1	0	0	0	0	0	0	0	0	1	0
OTU_2339	0	0	0	0	0	0	0	0	1	2	0	0	3	1	0	0	0	0	0	0	0	0	0	0	0	0	0	0	0	0	0	0	0	0	0	0	0	0	0	0	0	0	0	0	0	0	0	0	0
OTU_1543	0	0	1	0	0	0	0	1	0	0	0	0	0	0	0	0	0	0	0	0	0	0	0	0	1	0	0	0	0	0	0	0	0	0	2	0	0	0	1	0	0	0	0	0	0	0	0	0	0
OTU_1167	0	2	2	2	0	0	0	1	0	0	0	0	0	0	2	0	1	0	0	0	0	0	1	0	0	1	0	0	0	0	0	0	0	1	1	0	0	1	0	0	0	0	0	0	1	0	0	0	0
OTU_2327	0	1	0	0	0	0	0	0	0	0	0	0	0	0	0	0	0	0	0	0	0	0	0	0	0	1	0	0	0	0	0	0	0	0	0	0	0	0	0	1	0	0	0	0	0	0	0	0	0
OTU_1197	0	0	0	0	0	0	0	0	0	0	0	0	0	0	0	0	0	0	0	0	7	0	0	0	0	0	0	0	0	0	0	0	0	0	0	0	0	0	0	0	0	0	0	0	0	0	0	0	0
OTU_1222	7	0	0	0	0	0	0	0	0	0	0	0	0	0	0	0	0	0	0	0	0	0	0	0	0	0	0	0	0	0	0	0	0	1	0	0	0	0	0	0	0	1	0	0	0	0	0	0	0
OTU_1698	0	0	0	0	0	0	0	0	0	3	0	0	0	0	0	0	0	0	0	0	1	0	0	0	1	1	0	0	0	0	0	0	0	0	0	0	0	0	0	0	0	0	0	2	0	1	0	0	0
OTU_428	0	1	1	0	0	1	0	0	1	1	1	1	1	1	0	1	1	0	0	0	0	0	0	3	1	0	1	0	0	0	0	2	0	0	0	0	0	1	0	0	0	0	0	4	0	0	0	0	0
OTU_2432	0	2	0	0	0	0	0	1	1	0	0	0	0	0	0	0	0	0	0	0	0	0	0	0	0	0	0	0	0	0	0	0	0	0	0	0	0	0	0	0	0	0	0	0	0	0	0	0	0
OTU_1946	0	0	0	0	0	0	0	0	1	0	0	0	0	1	2	0	0	0	0	0	0	0	0	0	0	0	0	1	0	0	0	0	0	0	0	0	0	0	0	0	0	0	0	0	0	0	0	0	0
OTU_514	0	0	0	0	0	0	0	0	0	0	0	0	0	0	0	0	0	0	0	0	0	0	0	0	0	0	0	0	0	0	0	0	0	0	0	0	0	0	0	0	1	0	0	0	21	0	0	0	0
OTU_399	0	0	0	0	0	0	0	0	0	0	0	0	0	0	0	0	0	0	0	0	0	0	0	0	0	0	0	0	0	0	0	0	0	0	0	0	0	0	0	0	0	0	0	0	0	0	0	0	0
OTU_1313	0	0	1	3	0	0	1	0	0	0	1	0	0	0	0	0	0	0	0	0	1	1	0	0	1	0	0	5	0	0	0	1	0	0	0	0	1	4	0	1	0	0	0	0	2	0	0	0	0
OTU_929	0	1	0	1	1	0	1	0	0	1	0	0	0	0	0	0	0	0	0	0	1	0	3	1	0	1	0	0	0	1	0	0	0	0	0	0	0	0	2	0	0	0	0	0	0	0	0	0	0
OTU_1975	0	0	0	0	0	0	0	1	0	0	0	0	0	0	0	0	0	0	0	0	0	0	0	0	0	0	0	0	0	0	0	0	0	0	0	0	0	0	1	0	0	0	0	0	0	0	0	0	2
OTU_1077	0	0	1	0	0	0	0	0	0	0	0	0	1	0	1	2	3	0	0	0	0	0	0	0	0	0	0	0	0	0	0	0	0	1	0	2	0	0	0	0	2	1	0	0	0	0	0	1	0
OTU_1805	0	0	2	0	0	0	0	1	0	0	0	0	0	0	0	1	0	0	0	0	0	0	0	0	0	0	0	0	0	0	0	0	0	0	0	0	1	0	0	0	0	0	1	0	0	0	0	0	1
OTU_2468	0	1	0	0	0	0	0	0	0	0	0	1	0	0	0	0	0	0	0	0	0	0	1	1	1	0	0	0	0	0	0	0	0	0	0	0	0	0	0	0	1	0	0	0	2	0	0	0	0
OTU_1062	1	0	3	1	0	0	0	0	3	0	0	0	2	0	0	2	0	0	0	0	0	2	1	0	0	0	1	0	0	0	0	0	0	0	0	0	0	0	0	0	0	0	0	0	0	0	0	0	6
OTU_2496	0	0	0	1	0	0	0	0	0	0	0	0	0	0	0	0	0	0	0	0	0	0	0	0	0	0	0	0	0	0	0	0	0	0	0	0	0	0	0	0	0	0	0	0	0	0	0	0	2
OTU_1454	0	1	2	0	0	0	0	0	0	0	0	0	0	0	0	0	0	0	0	0	0	0	0	0	0	1	0	0	0	0	0	0	0	0	0	0	0	0	1	0	0	0	0	0	0	0	0	0	0
OTU_2489	0	0	0	0	0	0	0	0	0	0	0	0	0	0	0	0	0	0	0	0	0	0	0	0	0	0	0	0	0	0	0	0	0	0	0	0	0	0	0	1	0	0	0	0	0	2	0	0	0
OTU_1052	0	0	0	2	0	0	0	0	0	0	0	0	0	0	0	0	0	0	0	0	0	0	0	1	0	1	0	0	0	0	0	0	0	0	0	0	1	0	0	0	0	0	0	1	0	0	0	0	0
OTU_1833	1	0	0	0	0	1	0	0	0	0	0	0	0	0	0	0	0	0	0	0	0	0	0	0	0	0	0	0	0	0	0	0	0	0	0	1	1	0	0	0	0	0	1	0	0	0	0	0	0
OTU_2490	0	0	0	0	0	0	0	0	0	0	0	0	1	1	0	0	0	0	0	0	0	0	0	1	2	0	0	0	0	1	0	0	0	0	0	0	0	0	0	0	0	0	0	0	0	0	0	0	0
OTU_2181	0	0	0	0	0	1	0	0	0	0	0	0	0	0	0	0	0	0	0	3	0	0	0	0	0	0	0	0	0	0	0	0	0	0	0	0	1	0	0	1	0	0	0	0	0	0	0	0	0
OTU_1215	0	0	0	1	0	0	0	1	0	1	0	1	1	0	0	0	0	0	0	0	1	0	0	0	0	0	0	0	0	0	1	0	0	0	0	1	0	0	0	0	0	0	0	0	0	2	0	0	1
OTU_977	0	1	0	0	0	0	0	0	0	0	0	0	0	0	0	0	0	0	0	0	0	0	0	0	0	0	0	0	0	0	1	0	1	0	0	1	0	0	0	0	8	0	4	0	0	0	0	0	0
OTU_1164	0	0	0	0	0	0	0	0	1	1	0	1	0	0	0	0	1	0	0	0	0	1	0	1	0	1	0	0	0	0	0	0	0	0	0	0	0	1	0	0	0	0	0	1	0	0	0	0	0
OTU_1187	0	1	0	0	0	0	0	0	0	0	0	0	1	0	0	0	0	0	0	1	1	0	0	0	0	0	0	1	0	0	0	0	0	0	0	0	0	0	1	0	0	0	0	0	0	3	0	1	0
OTU_1166	0	1	0	0	0	0	0	0	0	0	1	0	0	0	1	0	0	0	0	5	0	1	0	0	0	0	0	0	0	1	0	0	0	0	1	1	0	0	1	0	0	0	1	1	0	0	0	0	0
OTU_1192	1	0	0	0	0	3	0	0	0	0	0	0	0	0	0	0	0	0	0	0	0	0	0	0	0	0	0	1	0	0	0	0	0	0	0	0	0	0	0	0	0	1	0	0	0	0	0	0	0
OTU_1054	0	0	0	0	0	0	0	0	1	0	0	0	0	0	0	0	0	0	0	0	0	1	0	1	0	3	0	0	0	1	0	0	1	1	0	2	1	1	0	0	0	0	0	0	0	0	0	0	1
OTU_2171	0	0	0	0	0	1	0	0	0	0	0	1	0	0	0	0	0	0	0	0	0	0	0	0	0	0	0	0	0	0	0	0	0	0	0	0	0	0	0	0	0	0	0	0	0	0	0	0	0
OTU_1760	0	0	0	0	0	0	0	0	0	0	0	1	0	0	0	0	0	0	0	0	0	0	0	0	0	0	0	0	0	0	0	0	0	0	0	0	0	0	0	0	0	1	0	0	0	0	0	0	0
OTU_2061	0	0	0	0	0	0	0	1	0	0	0	0	0	0	0	0	0	0	0	0	0	0	0	0	0	0	0	0	0	0	0	0	1	0	0	0	0	0	0	1	0	0	0	0	0	0	0	0	0
OTU_1971	0	0	4	0	0	0	0	1	0	0	0	0	0	0	0	0	0	0	0	0	0	0	0	0	0	0	0	0	0	0	1	0	0	0	0	0	1	0	0	0	0	0	0	0	1	0	0	0	0
OTU_2388	0	0	1	0	0	0	0	0	0	0	0	0	0	0	0	0	0	0	0	0	0	0	0	0	0	0	0	1	0	0	0	0	0	0	0	0	0	0	3	0	0	0	0	0	0	0	0	0	0
OTU_2005	0	0	0	0	0	0	0	0	0	0	0	3	0	0	0	0	0	0	0	0	0	0	0	0	0	1	0	0	0	0	0	0	0	0	0	0	0	0	0	0	0	0	0	0	0	0	0	0	0
OTU_997	0	2	3	1	1	0	0	0	0	0	0	0	2	0	0	0	1	0	1	2	0	2	0	0	0	0	1	1	3	0	1	0	0	0	1	0	0	0	0	0	1	0	0	0	0	0	0	2	0
OTU_1766	0	1	0	1	0	0	1	1	0	0	0	0	2	0	0	0	0	0	0	0	1	0	1	0	0	1	0	2	1	0	1	0	3	1	0	0	0	0	0	0	0	1	0	1	0	1	1	0	1
OTU_2134	0	0	0	0	0	0	0	0	2	0	0	0	0	0	0	0	0	0	0	0	0	0	0	0	0	0	0	0	0	0	1	0	0	0	0	0	0	0	0	0	1	0	0	0	0	0	0	0	0
OTU_2548	0	0	0	0	0	0	0	0	0	0	0	0	1	0	0	0	0	0	0	0	0	0	0	0	0	0	2	0	0	0	0	0	0	0	0	0	0	3	0	0	0	0	0	0	0	0	0	0	0
OTU_2111	0	2	0	1	1	0	0	0	0	1	0	0	1	0	0	0	0	0	0	0	0	0	3	0	0	0	0	1	0	0	0	0	1	0	0	1	0	0	0	0	0	0	1	0	0	3	0	0	0
OTU_2163	0	1	0	1	0	0	0	0	1	0	0	0	0	1	0	1	1	0	1	0	0	0	0	0	0	0	0	0	0	1	0	1	0	1	0	0	0	0	0	0	1	0	0	1	0	0	0	0	0
OTU_730	2	1	0	1	0	0	0	0	1	0	0	2	0	2	0	0	1	1	3	0	0	0	0	0	0	0	0	1	0	0	0	0	0	0	0	0	0	0	0	0	0	0	0	0	0	0	0	0	0
OTU_2325	0	1	0	0	2	0	0	0	0	0	1	0	0	0	0	0	0	0	0	0	0	0	0	0	0	1	0	0	0	0	0	0	0	0	1	0	0	0	0	0	0	0	1	0	1	0	0	0	0
OTU_2564	0	1	0	0	1	0	0	0	0	0	0	0	0	0	0	0	0	0	0	0	0	0	0	0	1	1	0	1	0	0	0	0	0	0	0	0	1	0	0	0	0	0	1	0	0	0	0	0	0
OTU_1308	0	1	0	0	0	2	0	0	1	0	0	0	0	0	0	1	0	0	0	0	0	1	1	0	0	1	0	0	0	2	1	0	0	0	0	0	0	0	0	0	0	0	0	0	0	0	0	1	1
OTU_1127	0	0	0	0	0	1	0	0	0	0	0	0	0	0	0	0	0	0	0	0	0	0	0	0	0	1	0	4	0	1	0	0	0	0	0	0	0	0	0	0	0	0	0	1	1	0	0	0	0
OTU_1639	0	0	0	0	0	0	0	0	0	0	0	0	0	1	0	0	0	0	0	0	0	0	0	0	0	0	0	0	0	0	0	0	0	0	0	0	0	1	0	0	0	0	0	0	0	0	0	0	0
OTU_1884	0	0	0	4	0	0	0	1	0	0	0	0	1	0	0	0	0	0	0	0	0	0	0	0	0	0	0	0	0	0	0	0	0	0	0	0	0	0	0	0	0	0	0	0	0	0	0	0	0
OTU_1777	0	0	0	0	0	0	0	0	0	1	0	0	0	0	0	0	0	0	0	0	0	0	0	0	0	0	0	0	0	3	0	0	0	0	0	0	0	0	0	0	0	0	0	0	0	0	1	0	0
OTU_2170	0	0	1	0	0	0	1	0	0	0	0	1	0	0	0	0	0	0	0	0	0	0	0	0	0	0	1	0	2	0	0	0	0	2	0	0	0	0	0	0	0	0	0	0	0	0	0	0	0
OTU_1655	0	0	3	0	0	0	0	0	0	0	0	0	1	0	0	0	0	0	0	2	0	0	0	0	0	0	0	0	0	0	0	0	0	0	0	0	0	0	0	0	0	0	0	0	0	0	0	3	0
OTU_1328	0	0	0	0	0	1	1	0	0	0	0	1	0	0	1	0	0	1	0	0	0	0	0	0	0	1	0	0	0	0	0	0	0	1	0	0	0	0	0	0	2	1	0	0	0	0	0	0	0
OTU_1707	0	3	0	0	2	0	0	0	0	0	0	0	0	0	0	1	0	0	0	1	0	0	0	0	0	0	0	2	1	0	0	0	0	0	0	0	1	0	0	0	1	0	0	0	0	0	0	0	1
OTU_1421	0	0	0	0	0	0	0	0	0	0	0	0	0	0	1	0	0	1	0	0	0	0	0	0	0	0	0	0	0	0	0	0	0	0	0	0	0	0	0	0	0	0	0	0	0	1	0	3	0
OTU_2470	0	0	0	0	0	0	0	0	0	0	0	0	0	0	0	1	0	0	0	1	0	0	0	0	0	0	0	0	1	0	0	0	0	0	0	0	0	0	0	0	0	0	0	0	0	0	0	1	0
OTU_2344	0	1	0	0	0	0	0	1	0	0	0	0	0	1	0	0	0	0	1	0	0	2	0	0	0	1	0	0	0	0	0	0	1	0	0	0	0	0	0	0	0	0	0	0	0	0	0	0	1
OTU_2402	0	0	0	0	0	0	0	0	0	0	12	0	0	0	0	1	0	0	0	0	0	0	0	0	1	0	0	1	0	0	0	0	0	0	0	0	0	0	0	0	0	0	3	0	3	0	0	0	1
OTU_2472	0	0	0	0	0	0	0	0	0	0	0	3	0	0	0	1	0	0	0	0	0	0	0	0	0	3	0	0	0	0	0	0	0	0	0	0	0	0	0	0	0	0	0	0	0	0	0	1	0
OTU_1725	0	0	0	1	0	2	0	0	0	1	0	0	0	0	0	0	1	1	0	0	0	0	1	1	0	2	0	0	0	0	0	0	0	0	0	0	0	1	0	0	0	1	0	1	0	2	1	0	1
OTU_984	0	0	0	0	0	0	0	0	0	0	1	0	0	0	0	0	0	0	0	0	0	0	0	1	0	0	0	0	0	0	0	0	0	0	0	0	0	0	0	1	0	1	0	0	0	2	0	5	0
OTU_1473	0	2	0	0	0	1	0	0	0	2	0	1	1	1	0	0	0	0	1	0	1	0	0	0	0	0	0	1	0	1	1	0	0	0	0	0	0	0	0	0	0	0	0	0	0	0	0	1	0
OTU_1115	0	0	2	1	1	0	0	0	0	0	0	0	0	0	0	1	0	0	0	0	0	0	1	0	0	1	1	1	0	0	0	0	0	0	0	0	0	1	0	0	0	0	1	0	0	0	0	0	0
OTU_1688	1	0	0	0	0	0	0	0	0	0	0	0	0	2	0	0	0	0	0	1	0	0	1	0	0	0	0	1	0	0	0	0	0	0	0	0	0	0	0	0	0	0	0	0	0	0	0	0	0
OTU_2554	0	0	1	0	0	0	0	1	0	0	0	0	0	0	0	0	0	0	0	0	1	0	0	0	0	0	0	0	0	0	0	0	0	0	1	0	0	0	0	1	0	0	0	0	0	0	0	0	0
OTU_1340	0	3	0	1	0	0	0	1	0	0	0	0	0	0	0	1	0	0	0	0	0	0	0	0	5	0	0	0	0	0	0	0	1	0	0	0	1	4	0	1	0	1	0	0	3	1	0	0	0
OTU_1314	0	0	0	0	0	0	0	1	0	0	0	0	0	0	0	0	0	0	0	0	0	0	0	0	0	0	0	0	0	0	0	0	0	0	0	0	0	1	0	0	0	0	0	0	0	0	0	0	1
OTU_1532	0	0	0	0	0	0	1	1	0	0	0	0	0	0	1	0	1	0	0	0	1	1	0	0	0	0	0	1	0	0	0	0	0	0	0	0	0	0	0	1	0	0	0	0	0	0	0	0	1
OTU_1347	0	0	1	0	0	0	0	1	0	0	0	0	0	0	0	1	0	0	0	0	1	0	0	0	0	0	0	0	0	0	0	0	0	0	4	0	0	0	0	0	0	0	0	0	0	0	0	0	1
OTU_2487	1	0	0	0	0	0	0	0	0	0	0	0	0	0	0	0	0	0	0	0	1	0	0	0	0	4	0	0	1	0	0	1	0	0	0	1	0	0	0	0	0	0	0	0	0	0	0	0	0
OTU_1004	2	1	0	0	0	1	1	0	0	0	0	0	0	0	0	0	0	0	0	0	0	0	0	0	1	1	2	0	0	1	0	0	0	0	0	0	1	0	1	0	5	0	0	2	0	0	0	0	0
OTU_935	0	2	1	1	0	0	0	1	0	0	0	0	0	0	0	0	0	0	0	0	0	0	0	0	0	0	0	2	1	1	0	0	0	0	0	0	1	0	0	0	0	0	0	0	0	0	0	0	0
OTU_2486	0	0	0	1	0	0	0	0	0	0	0	0	0	0	0	0	0	0	0	0	0	0	2	0	0	0	0	0	0	0	0	0	0	0	0	0	0	0	0	0	0	0	0	1	0	0	0	0	0
OTU_2002	0	0	0	0	0	0	0	1	0	0	0	0	0	0	0	1	0	0	0	0	0	0	0	3	0	1	0	0	1	0	0	0	0	0	0	0	0	1	0	0	0	0	0	0	0	0	0	0	0
OTU_712	0	1	2	0	1	1	0	0	0	0	0	0	0	1	0	0	0	0	0	1	0	1	0	0	0	0	1	1	0	0	0	0	0	0	0	1	1	0	0	0	0	0	0	0	0	0	0	0	1
OTU_1149	0	0	0	0	0	0	0	1	0	0	0	0	0	0	0	0	3	0	0	0	0	0	0	0	0	0	1	0	1	0	0	0	0	0	0	0	0	0	0	0	0	0	1	0	0	0	0	0	1
OTU_1824	0	0	1	0	0	0	0	0	0	0	0	0	0	1	0	0	1	0	1	0	0	0	0	0	0	0	0	0	0	0	0	0	0	0	0	0	0	0	0	0	0	0	0	0	0	0	0	0	0
OTU_2503	0	0	0	0	0	0	0	0	0	0	0	0	0	0	0	0	0	0	0	0	0	0	0	0	0	0	0	0	0	0	0	0	0	0	0	0	1	0	0	0	0	0	0	0	0	0	0	0	0
OTU_1831	0	1	0	0	0	0	0	2	0	0	0	0	0	0	1	0	4	0	0	0	0	0	0	0	0	0	1	0	0	0	0	0	0	0	0	0	0	0	1	0	0	0	0	0	0	0	0	0	0
OTU_1810	0	0	0	0	0	0	0	0	0	0	0	0	0	0	0	0	0	0	0	0	0	0	0	0	0	0	0	0	0	4	0	0	0	0	0	0	0	0	0	0	0	0	0	0	0	0	0	0	0
OTU_2398	0	0	0	3	0	0	0	0	0	0	0	0	0	0	0	0	0	0	0	0	0	0	0	0	0	0	0	0	0	0	0	0	0	0	0	0	0	0	0	0	0	0	0	0	0	0	0	0	0
OTU_1939	0	0	0	0	0	0	0	1	0	0	1	0	1	0	0	0	0	0	0	0	0	0	0	1	0	1	0	0	0	1	0	1	1	0	0	0	0	0	0	0	0	0	0	0	0	0	0	0	1
OTU_1291	0	0	0	0	0	0	0	0	0	0	0	0	0	1	0	1	0	0	0	0	1	0	0	0	0	0	0	0	0	0	0	0	0	0	0	0	0	1	1	1	0	0	0	0	0	0	1	0	1
OTU_2022	0	0	0	1	0	0	0	2	0	0	0	0	1	0	0	0	1	0	0	0	0	0	0	0	0	0	0	0	0	0	0	0	0	0	0	0	0	0	0	0	0	0	0	0	0	0	0	1	0
OTU_708	1	0	0	0	0	0	0	0	0	0	0	4	0	0	0	0	0	0	0	0	0	0	0	0	4	0	0	0	1	0	0	0	0	0	1	16	0	0	0	0	0	0	0	0	0	0	0	0	0
OTU_2409	0	0	0	0	0	0	0	0	0	0	0	0	0	0	0	0	0	0	0	0	2	0	0	0	0	0	0	0	0	0	0	0	0	0	0	0	0	0	0	0	0	0	0	0	0	0	0	0	0
OTU_2410	0	0	0	2	0	0	0	0	0	0	0	0	0	0	0	0	2	0	0	0	1	0	0	0	0	0	0	0	0	0	0	0	0	1	0	0	0	0	0	0	0	0	0	1	0	0	0	0	0
OTU_1456	0	0	0	0	0	0	0	1	0	0	0	0	1	0	0	0	0	0	0	0	0	0	0	0	0	0	0	0	0	0	0	0	0	0	1	0	0	0	1	0	1	0	1	0	0	0	0	0	0
OTU_874	1	4	1	0	1	0	0	0	2	0	0	0	3	1	0	4	2	0	0	0	1	4	0	0	0	1	0	0	2	0	1	0	1	0	0	3	0	0	3	0	1	0	1	0	1	0	0	1	0
OTU_981	0	0	0	0	0	0	0	0	0	0	0	0	0	0	0	0	0	0	0	0	0	0	0	0	0	0	0	0	0	0	0	0	0	0	0	0	0	0	0	0	0	1	0	0	0	0	0	0	1
OTU_1711	0	0	0	0	0	0	0	0	0	0	0	0	0	0	1	0	0	0	0	0	0	0	0	0	0	0	0	0	1	0	0	0	0	0	0	0	0	0	0	0	0	0	0	0	1	0	0	1	0
OTU_1583	0	0	0	0	0	0	0	0	1	0	0	0	0	0	0	0	0	0	0	0	0	0	0	0	0	0	0	0	0	1	0	0	0	1	0	1	0	0	0	0	0	0	0	0	0	5	0	0	1
OTU_1878	0	0	0	1	0	0	0	0	0	0	0	0	0	0	0	0	0	0	0	0	0	0	1	0	0	0	0	0	0	0	0	0	0	0	0	1	0	0	0	1	0	0	1	0	1	0	0	0	0
OTU_2133	0	1	0	0	0	0	0	0	0	0	0	0	0	0	0	0	0	0	0	0	0	1	0	0	0	0	0	0	0	0	0	0	1	0	0	0	0	0	0	0	0	0	0	0	0	0	0	0	0
OTU_1650	0	0	0	0	0	0	0	0	0	0	0	0	0	1	0	0	1	0	0	0	0	1	0	0	0	0	0	0	1	0	0	0	0	0	0	0	0	0	0	0	0	0	0	0	0	0	0	0	0
OTU_1694	0	0	0	0	0	0	0	0	0	0	0	0	0	0	0	0	0	4	0	0	0	0	0	0	0	0	0	0	0	0	0	0	0	0	0	0	0	0	0	0	0	0	0	0	0	0	0	0	0
OTU_2162	0	0	0	0	0	0	0	0	0	0	0	0	0	0	0	0	0	0	0	0	0	0	0	1	0	0	0	0	0	0	0	0	0	0	0	0	0	1	0	0	0	0	0	0	0	0	0	0	1
OTU_2187	0	0	0	0	0	0	0	0	0	0	0	0	0	0	0	0	0	0	0	0	0	0	0	0	0	0	0	0	0	0	0	0	0	0	0	0	0	0	0	0	0	0	0	0	0	0	0	0	0
OTU_734	0	0	0	0	0	0	0	0	0	0	1	0	0	0	0	0	0	0	0	0	0	0	0	0	0	0	0	0	0	0	0	0	0	0	0	0	0	0	0	0	0	0	0	0	0	0	0	0	0
OTU_866	0	0	0	0	0	0	0	0	0	0	0	0	0	3	0	0	0	0	0	0	0	0	0	0	0	0	0	0	0	0	1	0	0	0	0	0	0	0	0	0	0	0	0	0	0	0	0	0	0
OTU_1713	1	1	0	0	0	0	0	0	0	0	0	0	0	0	0	0	0	0	1	0	0	0	0	0	1	0	0	0	0	0	0	0	1	0	0	0	0	1	0	0	0	0	0	0	0	0	0	0	0
OTU_1714	0	1	0	0	0	0	0	0	0	0	0	0	0	0	0	0	0	1	0	0	0	0	0	0	0	0	0	0	0	0	0	0	0	0	0	0	1	1	0	2	0	0	0	0	0	0	0	0	0
OTU_1708	0	0	0	1	0	0	0	1	0	0	0	0	0	0	0	0	0	1	0	0	0	0	0	0	0	0	0	0	0	0	0	0	0	0	0	0	0	0	0	0	0	1	1	0	0	0	0	0	0
[truncated: 581 more rows]
[truncated: 30 more columns]
