# Supplementary material for: Bt-modified transgenic rice shifted the composition and diversity of rhizosphere microbiota
Source: Preprints.org preprint supplement (doi:10.20944/preprints202402.1379.v1), 2024-02-23
Supplement: Supplementary file 6 [file Table S3.xlsx]

## Sheet: S3
Table S3 Sequencing counts and description of 2,549 predicted OTUs in TIC dataset.
OTU ID	S5T4	S1K1	S5K4	S4F4	S3F4	S5T3	S3T4	S1K3	S5F5	S2T4	S3F3	S4T4	S4K3	S5F2	S5F1	S5K5	S4K1	S2F5	S5K2	S3K5	S3K1	S5K1	S1K4	S2T2	S4F3	S4T3	S4K2	S5F3	S2F1	S1F3	S3K2	S1F4	S2K4	S1T2	S4K4	S2F3	S4F2	S4T2	S2F2	S5F4	S2K2	S1T4	S2K3	S2T5	S4F1	S3F5	S2T1	S3K4	S5K3
OTU_335	0	0	0	0	0	0	2	0	2	0	2	3	1	0	0	1	0	1	1	1	0	1	0	0	0	3	0	2	3	0	1	1	1	0	1	2	0	2	2	1	0	0	1	2	0	1	0	3	1
OTU_30	3	5	3	5	1	10	8	7	4	9	4	5	5	2	2	2	2	10	4	2	1	2	11	10	7	4	1	5	6	10	0	9	0	6	1	4	5	6	3	1	0	12	5	14	5	2	14	3	1
OTU_257	5	4	0	2	4	4	1	8	2	2	5	0	2	0	0	4	2	5	3	2	6	4	8	6	1	2	0	5	2	2	3	3	2	4	1	2	1	4	1	1	3	0	5	5	1	4	3	5	4
OTU_52	3	5	5	2	6	2	1	1	6	2	4	4	1	5	5	1	3	2	1	2	2	2	6	7	1	7	2	3	3	7	2	4	2	5	2	3	3	2	1	6	3	1	3	2	5	2	3	4	4
OTU_441	0	0	1	0	0	0	1	0	0	4	0	0	0	0	0	1	0	0	0	0	0	0	0	0	0	3	2	0	2	0	0	2	0	0	0	2	0	0	0	0	0	0	1	1	0	1	0	0	0
OTU_28	3	5	2	13	13	8	15	7	4	5	10	5	4	7	6	1	2	11	3	4	3	3	0	5	14	15	5	15	3	2	1	0	6	1	6	9	7	9	3	18	4	3	5	8	18	20	4	2	1
OTU_154	1	1	1	1	2	3	6	1	1	3	1	11	1	1	0	1	1	5	0	0	1	1	0	0	1	4	2	0	2	2	1	0	2	5	2	5	2	5	4	1	2	3	4	3	1	1	6	0	0
OTU_1026	0	0	0	0	1	0	0	0	1	0	0	0	0	0	0	0	0	0	0	0	0	0	0	0	0	2	0	0	0	0	0	0	0	0	0	0	0	0	0	0	0	0	0	0	0	0	0	0	0
OTU_11	6	8	4	7	6	4	11	10	4	4	7	8	6	9	11	4	12	12	6	5	13	10	6	14	10	7	1	9	7	11	7	3	13	0	4	7	2	6	16	8	9	1	11	16	14	10	13	9	11
OTU_29	14	8	6	12	7	9	12	6	6	8	7	7	4	6	11	7	6	11	5	4	6	2	8	11	7	9	5	12	6	8	6	9	4	9	7	6	5	7	7	9	6	18	7	14	13	5	18	3	5
OTU_59	13	4	8	8	10	7	6	6	4	6	8	8	13	1	7	3	10	8	7	4	2	2	7	8	6	10	8	8	20	12	10	13	5	5	10	6	4	5	12	4	3	6	5	9	8	5	9	5	7
OTU_9	14	12	14	17	18	7	5	12	22	13	17	7	16	19	23	19	12	20	23	37	24	11	9	12	14	6	12	16	37	18	20	14	18	24	13	7	12	15	43	18	19	21	30	14	12	15	21	16	8
OTU_199	5	5	4	2	6	7	6	8	3	7	3	8	3	10	4	2	5	6	5	4	3	4	1	2	6	4	2	6	8	2	1	8	1	3	3	6	4	2	5	6	2	4	10	3	3	3	3	6	9
OTU_326	5	1	1	0	0	2	3	0	0	0	5	1	0	1	0	1	1	3	0	0	0	0	0	2	4	1	0	0	1	0	0	0	1	0	0	3	2	7	0	0	0	0	0	1	1	6	0	2	0
OTU_1	65	47	55	62	76	84	70	89	71	85	120	38	43	75	58	52	67	127	60	65	101	42	86	61	63	85	78	57	90	66	59	72	92	88	63	75	56	67	64	83	96	94	70	83	81	85	94	82	61
OTU_279	1	5	3	1	1	2	0	0	2	1	1	0	3	0	1	4	2	0	2	0	5	0	1	1	0	2	1	1	0	1	0	0	0	1	3	1	0	0	0	0	0	1	1	2	0	0	0	2	1
OTU_3	18	19	22	42	21	34	21	2	34	8	23	27	8	17	28	22	11	13	12	8	11	7	11	10	43	18	10	41	7	2	3	4	6	14	15	23	26	50	6	18	8	17	7	14	31	20	7	18	4
OTU_372	0	0	0	2	0	2	0	2	0	0	0	0	0	1	0	2	1	0	0	0	0	2	0	0	0	1	0	0	0	1	0	3	0	0	0	0	3	0	0	1	0	0	0	0	0	0	0	0	0
OTU_1556	0	0	0	1	0	0	0	0	0	0	0	0	0	0	0	1	0	0	2	0	0	0	0	0	0	0	0	1	0	0	0	0	0	0	0	0	0	0	0	0	0	0	0	0	0	0	0	0	0
OTU_4	27	30	30	23	24	31	28	19	33	22	55	10	21	28	29	21	28	33	16	21	33	21	40	34	19	13	17	29	24	33	23	23	34	29	20	35	24	20	35	25	39	27	40	46	21	19	36	24	19
OTU_25	1	9	4	8	11	0	9	8	8	2	6	10	4	4	2	4	3	5	6	6	6	7	5	3	12	7	7	5	7	8	5	3	7	2	0	11	13	3	11	5	10	0	4	7	9	9	9	4	1
OTU_54	4	4	5	0	4	4	1	1	0	2	2	1	1	0	1	5	1	0	4	3	2	2	4	4	2	3	2	2	2	7	1	5	0	3	1	0	3	0	3	1	4	3	3	0	0	5	0	0	0
OTU_210	1	0	1	0	1	2	2	0	1	1	0	1	1	0	0	0	1	0	2	2	1	0	1	1	0	1	0	0	2	3	1	1	2	0	5	1	1	0	0	0	0	0	1	0	2	1	0	1	1
OTU_636	3	1	1	3	2	0	0	3	0	1	0	1	5	0	1	2	1	1	4	0	0	0	2	1	0	0	3	3	0	0	0	0	2	1	2	1	2	0	0	0	3	0	1	2	0	1	1	0	2
OTU_164	0	4	1	2	1	0	0	0	3	0	0	0	0	3	0	7	4	0	0	6	0	11	0	0	1	0	1	0	1	1	2	0	1	0	1	1	0	0	0	0	1	0	1	0	0	5	0	4	12
OTU_937	0	0	0	0	1	0	0	0	1	3	0	0	0	1	1	1	0	2	0	1	1	1	2	1	0	1	0	0	0	1	0	0	0	0	0	0	1	0	1	0	0	0	0	0	0	1	0	0	1
OTU_885	0	0	0	0	1	1	0	0	0	1	1	0	0	0	0	0	0	0	0	0	0	0	0	4	0	0	0	0	0	0	1	0	0	0	0	0	0	0	0	0	0	0	0	1	2	1	0	0	0
OTU_1859	0	0	1	1	0	0	0	0	0	0	0	0	0	0	0	0	0	0	0	0	0	0	0	0	1	0	0	0	0	0	0	0	0	0	1	0	0	1	0	0	0	0	0	0	0	1	0	0	1
OTU_22	4	0	2	6	10	7	2	2	9	3	12	2	7	5	3	5	5	1	3	9	17	8	1	1	1	3	6	4	3	1	5	1	4	0	3	5	4	3	2	7	2	0	0	0	6	12	1	10	6
OTU_177	0	2	3	1	2	3	0	1	4	1	0	4	7	5	3	10	4	2	0	5	1	2	2	6	6	2	5	2	0	9	2	5	12	0	2	0	0	2	0	5	4	1	16	1	0	1	0	2	5
OTU_103	10	10	18	9	12	10	13	23	20	11	18	13	24	25	23	8	11	22	19	11	27	17	24	21	22	13	14	15	32	20	11	16	36	5	10	30	22	16	38	16	20	13	20	18	13	17	31	26	12
OTU_398	3	0	3	1	3	0	1	3	0	2	2	1	1	1	2	2	1	1	0	0	0	3	1	0	3	0	0	6	0	0	2	3	1	1	5	0	0	4	2	1	1	1	0	2	3	1	1	0	0
OTU_303	4	6	0	3	13	1	2	10	0	6	3	2	2	3	1	1	3	14	6	6	4	1	10	9	6	4	2	6	19	5	6	6	4	1	1	3	3	5	5	2	3	3	2	3	3	5	4	4	1
OTU_757	1	0	0	0	0	0	0	1	0	0	0	1	0	0	0	1	0	0	0	1	1	1	0	0	1	0	0	0	0	3	2	1	2	0	0	0	0	0	0	1	2	0	4	0	0	0	0	1	0
OTU_312	6	2	3	1	8	0	8	5	7	2	3	0	3	6	5	1	4	1	4	7	3	4	5	5	6	1	14	1	3	13	4	6	7	2	3	6	8	3	5	7	4	0	7	4	0	8	2	8	1
OTU_94	13	7	6	7	4	4	5	2	4	8	4	1	1	2	7	8	5	2	4	2	1	8	0	4	11	4	7	6	4	4	0	3	0	0	1	3	11	7	1	9	2	1	3	0	5	1	2	5	2
OTU_264	1	3	0	3	0	1	3	0	0	0	0	1	1	2	1	0	0	0	0	2	0	0	1	0	1	1	2	0	2	2	3	0	0	0	0	0	0	1	0	1	1	0	0	0	0	1	0	1	1
OTU_37	7	4	1	3	4	6	4	12	1	2	6	3	2	7	1	2	0	6	4	5	8	2	7	14	3	2	5	7	8	8	3	5	2	0	2	2	6	1	3	6	4	1	6	8	6	2	6	0	3
OTU_683	0	0	0	0	2	1	1	0	0	0	0	0	0	0	0	2	1	0	0	1	0	0	0	0	0	0	0	1	0	7	1	2	1	0	0	0	0	0	0	0	1	0	0	0	0	0	0	0	0
OTU_2127	0	0	0	0	0	0	0	0	0	0	0	0	0	1	0	0	0	0	0	0	0	0	0	0	0	0	0	0	0	0	0	0	0	1	0	0	0	0	0	0	0	0	0	0	0	0	0	0	0
OTU_42	2	17	13	2	2	4	2	0	3	0	1	13	1	2	1	0	4	0	0	0	2	1	0	7	6	2	0	1	2	0	3	0	1	0	0	6	11	5	0	1	1	0	2	2	0	2	0	3	1
OTU_986	0	0	0	0	0	0	0	0	0	0	0	0	0	0	0	0	0	0	0	0	0	0	0	0	0	0	1	0	0	0	0	0	0	0	3	0	0	0	0	0	0	0	0	0	0	0	0	0	0
OTU_57	5	1	2	0	3	3	3	2	2	8	2	4	3	3	3	3	5	4	3	1	1	3	5	2	4	1	5	6	0	3	5	7	1	3	3	2	1	2	6	3	3	1	3	1	2	2	0	2	3
OTU_51	7	7	3	4	18	3	3	5	10	57	8	9	4	6	5	12	5	7	2	4	10	5	7	4	4	3	11	1	6	3	3	8	2	13	0	9	6	8	5	5	6	9	4	17	7	17	4	4	2
OTU_36	11	21	9	6	9	11	18	19	14	10	17	11	14	16	18	11	8	15	7	18	13	8	25	18	9	9	17	17	13	20	24	23	14	13	20	18	4	8	21	10	15	30	7	19	10	10	12	9	23
OTU_44	4	3	0	7	2	8	18	1	4	8	4	14	4	5	6	2	3	5	2	7	2	1	3	3	11	8	2	2	5	4	1	4	2	6	2	7	15	11	2	8	5	4	1	7	10	2	8	5	3
OTU_87	6	6	5	1	5	1	5	4	2	3	3	8	7	4	10	5	2	6	4	9	4	5	9	3	2	2	16	4	3	7	5	2	6	3	8	4	2	9	5	5	4	8	13	2	5	6	2	5	10
OTU_728	0	0	0	0	0	2	1	2	0	0	0	0	0	1	1	0	0	0	0	0	0	0	0	1	0	0	0	0	1	0	0	0	0	4	0	1	0	0	0	0	0	1	0	0	1	0	1	0	1
OTU_332	1	1	1	1	2	0	1	2	0	0	3	2	3	0	1	2	1	1	0	0	4	1	1	0	0	2	2	0	1	0	3	0	0	0	1	0	2	3	1	0	0	0	2	0	2	3	0	6	1
OTU_952	3	1	4	1	1	0	0	0	3	1	1	1	1	2	1	1	2	0	0	1	0	1	4	0	1	0	4	1	3	2	2	0	0	1	2	0	2	0	1	3	1	0	2	1	0	0	0	2	0
OTU_106	2	4	0	15	4	2	12	1	3	5	9	6	2	5	0	4	2	3	4	4	6	0	1	3	5	6	2	8	5	3	3	0	0	9	0	11	5	10	3	1	1	0	2	6	4	2	3	0	2
OTU_1100	0	0	0	0	0	0	0	1	0	0	0	0	0	0	0	0	0	0	1	0	0	0	0	0	0	0	0	0	0	0	1	1	0	0	0	0	1	0	0	0	1	0	0	1	0	0	0	0	0
OTU_647	0	0	0	0	1	1	0	0	1	0	0	1	0	0	0	0	0	0	0	1	0	0	1	0	1	0	1	2	0	0	0	0	0	0	0	0	7	1	0	3	1	0	0	1	0	0	0	0	0
OTU_512	10	15	31	12	19	8	13	22	30	10	11	7	40	21	36	37	32	20	27	30	30	15	20	14	17	15	20	20	17	16	36	22	29	31	30	22	13	13	36	22	23	19	40	16	6	16	25	34	31
OTU_308	4	2	1	1	0	0	2	0	0	3	1	0	0	1	1	1	0	1	0	0	0	0	1	0	1	0	0	2	0	2	0	0	2	1	1	0	0	1	0	1	1	1	0	0	0	0	0	1	0
OTU_643	0	0	0	0	0	0	0	1	9	0	0	0	0	0	0	0	0	0	0	0	0	0	0	0	0	0	1	0	0	0	0	0	0	0	0	0	0	0	0	0	0	0	0	0	0	0	0	0	1
OTU_299	6	1	2	2	1	8	2	0	6	1	5	2	2	4	4	1	1	2	2	0	2	1	1	1	2	1	3	7	1	0	0	0	0	0	1	0	4	1	4	3	1	1	0	1	1	1	1	2	5
OTU_217	1	1	1	0	1	1	3	3	0	3	4	4	0	1	1	0	1	1	2	0	2	2	1	6	0	1	0	2	2	2	0	3	1	0	4	0	1	2	4	1	0	2	1	0	2	1	1	4	0
OTU_66	8	3	6	10	11	7	7	5	3	16	7	10	4	2	6	5	9	13	6	4	5	5	4	7	8	12	4	4	5	4	4	6	3	10	7	19	8	11	6	6	11	4	5	10	15	11	12	1	3
OTU_2282	0	3	0	0	0	0	0	0	0	0	0	0	0	1	0	0	0	0	0	1	0	0	0	0	0	0	1	0	0	0	1	0	0	1	0	0	0	0	0	0	0	0	0	0	0	0	0	0	1
OTU_2	31	38	55	19	21	27	19	43	32	36	19	21	36	40	35	57	33	21	57	35	41	70	32	56	20	24	20	26	31	53	29	52	31	36	38	26	18	30	22	31	34	33	36	29	20	24	31	30	34
OTU_170	6	6	7	6	5	7	4	2	5	5	3	4	19	4	4	5	11	5	4	11	7	13	5	3	2	10	13	2	4	7	12	3	13	5	13	7	3	2	6	4	8	1	8	4	8	4	9	10	12
OTU_2157	1	0	0	0	1	0	0	0	0	0	0	0	0	1	0	1	0	0	0	0	1	0	0	0	1	3	0	0	0	0	0	0	0	0	0	1	0	1	0	0	0	1	1	0	0	1	0	0	0
OTU_527	2	1	4	2	0	0	1	2	1	1	1	2	7	1	1	0	0	0	1	1	1	0	3	1	2	1	0	0	0	2	3	0	1	0	1	1	1	0	1	1	1	0	1	3	0	0	0	0	1
OTU_1625	0	0	0	0	1	0	0	0	0	0	0	0	0	0	0	0	0	0	0	0	0	0	0	0	0	0	0	0	0	0	0	0	0	0	0	0	0	0	0	0	0	0	0	0	0	0	2	0	0
OTU_1409	0	0	0	0	0	0	0	0	0	0	0	0	0	0	0	0	0	0	0	0	0	0	0	0	0	0	0	0	0	0	0	0	0	0	0	0	0	0	0	0	0	0	0	0	0	0	4	0	0
OTU_1555	0	0	1	0	0	0	0	1	0	0	0	0	0	0	0	1	1	0	0	0	0	0	0	0	0	0	0	0	0	0	1	1	0	0	0	1	0	0	0	0	1	0	0	0	0	0	0	0	0
OTU_649	0	1	0	1	1	1	0	0	0	1	0	0	2	1	0	0	0	0	0	1	0	0	1	2	0	0	1	0	0	5	1	3	2	4	0	1	0	1	0	0	1	1	0	0	0	1	0	1	0
OTU_301	1	0	2	1	0	3	1	1	0	1	1	0	0	0	0	0	0	0	0	0	0	0	0	0	1	0	0	1	0	0	0	2	0	1	0	0	2	3	0	0	0	1	0	0	0	6	0	0	0
OTU_503	0	3	1	1	3	2	0	1	0	0	0	4	0	2	3	2	0	2	0	0	3	1	1	1	2	0	3	4	0	1	0	0	0	0	2	0	1	0	0	1	3	1	0	0	3	2	0	1	3
OTU_38	33	15	26	26	30	19	30	24	31	16	30	14	24	22	22	26	19	13	20	15	23	26	28	22	23	31	21	24	23	22	27	15	26	25	12	31	21	13	37	30	39	37	27	20	25	30	20	25	16
OTU_13	4	6	10	6	4	3	2	7	1	1	4	3	11	4	11	5	8	3	5	11	9	5	4	2	2	4	5	5	4	3	13	7	9	3	7	2	8	1	0	5	6	0	12	5	7	3	1	9	6
OTU_229	0	1	2	0	0	0	0	7	0	1	1	0	3	1	0	1	2	0	5	3	0	2	1	0	0	0	1	1	0	0	4	0	1	0	1	0	0	0	1	0	1	0	1	0	0	1	1	0	4
OTU_5	9	17	55	6	11	9	4	35	22	13	12	5	40	36	28	53	35	14	41	32	26	73	17	10	0	7	22	6	20	33	25	20	19	4	37	13	4	5	10	17	34	15	31	5	1	14	4	35	49
OTU_1442	0	0	0	0	0	0	1	0	0	0	0	0	0	0	0	0	0	0	0	0	0	0	0	0	0	0	0	0	0	0	0	0	0	0	0	1	0	0	0	0	0	0	0	0	0	0	0	0	0
OTU_104	0	3	2	2	2	1	0	1	2	1	1	0	1	2	4	1	2	0	1	2	1	0	1	0	1	2	2	5	0	0	1	0	0	0	1	0	2	0	2	3	7	0	1	2	1	2	0	1	1
OTU_80	0	0	7	1	0	1	1	5	1	3	2	1	3	3	1	5	5	6	2	5	4	3	5	2	2	3	3	0	3	5	4	3	5	0	1	3	2	1	2	3	3	6	6	1	4	1	1	3	3
OTU_499	1	0	0	0	0	0	0	0	0	0	0	0	0	0	0	0	0	0	0	1	0	0	0	0	1	0	0	0	0	0	0	0	0	0	3	2	1	0	0	1	0	0	0	0	0	0	0	0	0
OTU_50	5	12	3	5	5	11	9	9	4	9	8	8	5	6	7	2	8	8	0	6	11	3	12	8	9	9	3	4	2	10	7	8	6	15	6	7	5	9	5	3	3	10	3	5	7	7	5	14	6
OTU_162	1	2	0	2	1	1	0	3	1	1	6	0	5	4	1	2	2	1	4	1	2	3	1	2	1	2	0	2	2	4	3	1	3	1	4	4	1	3	2	3	3	0	2	0	5	4	0	2	2
OTU_536	2	0	0	2	0	0	1	0	0	1	1	2	0	1	2	1	0	1	1	0	1	0	1	0	1	0	0	1	0	0	1	0	0	1	0	3	0	1	1	0	1	0	1	1	1	1	0	0	2
OTU_407	0	0	0	0	0	0	0	0	0	0	0	1	0	5	0	0	0	0	0	0	0	0	1	1	2	0	0	0	0	0	0	0	0	1	0	0	0	0	0	1	0	0	0	0	0	0	0	0	0
OTU_8	28	17	7	20	18	22	14	15	18	36	32	14	12	13	21	7	17	18	18	20	13	13	28	29	21	16	14	20	17	23	12	25	18	25	8	23	18	21	21	12	15	35	8	21	23	13	49	11	10
OTU_2338	0	0	0	0	0	0	0	0	0	0	0	0	0	0	0	0	0	0	0	0	0	0	0	0	0	0	0	0	0	0	0	0	0	0	0	0	0	0	0	0	0	0	0	0	0	0	0	0	0
OTU_311	3	0	1	1	2	1	2	0	1	4	2	1	2	3	2	1	1	0	0	2	1	1	1	7	6	1	1	1	2	6	2	1	3	1	1	1	3	2	0	0	2	1	2	5	3	1	1	1	2
OTU_253	1	3	0	1	0	1	0	0	0	0	0	0	0	1	0	0	0	2	0	0	0	0	1	2	1	1	0	3	0	0	0	0	0	0	1	0	4	1	0	0	0	0	0	0	1	1	0	0	1
OTU_238	0	2	1	0	0	1	0	2	1	0	0	0	2	1	0	1	1	3	1	0	1	0	1	4	0	0	1	0	0	0	0	3	0	0	0	0	1	0	1	0	4	0	2	0	0	0	0	1	0
OTU_147	0	0	0	4	1	1	2	2	2	2	3	6	3	0	2	3	2	1	4	5	3	2	0	0	1	1	2	2	0	1	2	0	1	3	1	1	0	1	5	3	1	1	2	1	4	1	2	1	2
OTU_15	13	7	22	4	2	16	6	12	5	8	6	6	12	21	12	12	5	10	22	8	4	17	16	13	3	8	4	12	10	17	4	31	4	19	12	8	5	5	4	7	8	9	12	8	5	3	11	8	16
OTU_551	2	4	4	1	4	0	1	4	3	0	1	1	5	3	2	10	5	3	4	5	5	7	4	1	2	3	5	2	2	2	4	2	2	0	8	10	3	0	19	1	5	0	6	0	1	4	3	7	3
OTU_136	2	8	3	0	2	3	1	3	4	0	2	8	4	2	2	5	3	4	1	2	4	2	0	2	0	2	4	3	3	4	4	3	4	0	6	7	3	4	4	1	2	6	1	1	1	6	6	5	4
OTU_79	4	2	0	5	0	3	5	1	2	0	2	3	0	1	2	0	3	0	1	1	0	1	2	1	4	4	2	3	2	1	0	1	0	3	1	1	6	1	2	13	3	3	1	0	11	4	2	2	3
OTU_298	1	1	0	0	0	0	0	5	0	0	0	1	0	0	0	0	0	0	0	0	1	1	0	0	0	0	0	3	1	0	0	0	3	0	1	1	0	0	0	0	0	0	2	0	0	0	0	2	1
OTU_724	1	7	3	2	1	5	4	2	0	4	1	1	1	3	0	2	3	2	3	1	3	0	3	4	1	2	8	2	3	3	5	2	2	0	4	0	6	2	2	0	2	1	10	5	2	2	2	0	4
OTU_567	0	1	2	1	0	1	3	1	2	0	0	0	1	2	0	0	0	0	0	0	1	1	2	2	0	0	1	2	3	0	0	0	2	4	0	1	0	1	0	0	0	1	0	2	0	0	1	1	0
OTU_549	0	0	0	1	0	0	0	0	0	1	0	0	1	1	1	0	0	1	0	0	0	0	1	0	0	1	1	0	1	0	1	0	3	0	0	1	0	0	0	0	0	0	0	0	0	1	0	0	2
OTU_274	1	4	1	1	6	1	4	1	3	2	1	2	1	4	2	1	1	2	0	1	0	0	0	1	7	3	1	2	2	4	1	3	0	0	1	2	2	1	2	0	4	0	5	3	1	2	1	4	0
OTU_70	15	9	8	8	7	9	7	14	4	3	3	11	7	4	12	3	3	2	10	9	3	5	1	7	4	3	11	2	11	5	8	1	0	2	10	6	13	4	7	7	2	3	14	3	6	7	4	2	4
OTU_212	0	1	0	1	0	0	1	1	0	0	0	2	1	0	1	1	0	0	2	1	0	3	1	0	6	1	2	0	1	0	1	0	0	0	1	1	1	0	1	2	0	0	1	0	0	2	0	1	0
OTU_798	0	0	0	0	0	0	0	1	0	0	0	0	0	0	0	1	0	0	0	1	0	0	0	0	0	0	1	0	0	0	0	0	0	0	0	0	0	0	0	0	0	0	0	0	0	0	0	0	0
OTU_1071	0	0	0	0	0	0	0	0	0	0	0	0	0	0	0	1	0	0	0	0	0	0	0	0	0	0	0	0	0	2	0	0	0	0	0	0	0	0	0	0	0	0	0	0	0	0	0	0	0
OTU_129	0	0	1	2	6	1	1	3	2	4	2	0	2	1	0	0	5	3	1	2	1	2	0	3	0	0	2	3	1	2	2	2	2	0	2	0	2	0	2	0	8	0	4	2	0	4	0	5	1
OTU_1325	0	1	0	0	0	1	0	0	0	0	0	0	0	0	1	0	0	0	0	0	0	0	1	0	0	1	3	0	0	0	0	0	0	0	1	0	0	0	0	0	0	0	0	0	0	0	0	0	0
OTU_351	4	1	2	1	0	0	1	0	1	0	0	4	0	0	2	0	0	1	0	1	1	2	1	1	1	2	4	3	0	1	1	1	0	1	1	1	3	2	0	3	0	0	0	2	0	2	1	1	0
OTU_455	0	1	0	3	1	0	0	1	0	0	2	2	0	1	3	0	0	0	1	1	1	3	0	0	0	2	0	1	3	0	0	1	2	0	0	1	1	0	0	0	0	0	0	0	1	0	0	1	1
OTU_349	3	3	1	0	0	1	0	0	2	2	1	0	1	1	1	3	0	1	1	1	0	2	0	1	0	1	0	2	1	0	0	0	1	0	2	1	0	1	0	1	1	1	1	0	0	2	1	0	0
OTU_127	1	1	1	2	1	5	2	1	2	0	3	2	0	0	1	0	1	2	1	2	1	1	0	0	1	5	4	2	4	2	4	0	2	0	3	1	1	1	1	2	0	0	1	8	1	1	11	0	1
OTU_23	2	3	13	1	0	0	0	3	3	2	5	0	10	2	4	11	4	0	14	11	4	12	2	5	0	1	4	0	1	3	9	4	4	5	8	0	0	3	2	3	1	9	8	1	1	1	0	6	16
OTU_58	6	10	12	17	2	8	9	12	7	6	3	11	11	6	4	6	19	8	6	14	10	7	0	3	7	3	2	4	19	2	6	5	4	0	11	2	13	9	11	7	8	6	0	4	7	8	11	5	7
OTU_208	0	1	1	4	0	1	1	2	1	1	1	1	1	1	0	1	1	1	0	1	0	0	1	2	2	2	0	0	1	2	2	1	1	4	0	1	0	1	0	1	2	1	0	1	0	0	1	2	1
OTU_6	6	9	14	25	12	17	12	5	16	4	12	14	15	12	7	18	14	9	19	18	13	8	0	0	26	11	15	27	13	4	9	1	8	2	14	22	19	14	9	26	6	2	13	3	13	24	2	22	11
OTU_1544	0	0	0	1	0	1	0	0	0	0	0	0	1	0	0	0	0	0	0	0	0	0	0	0	0	0	0	0	0	0	0	0	0	0	0	0	1	0	0	0	0	0	0	0	0	0	0	0	0
OTU_211	2	1	1	1	0	1	0	0	2	0	1	4	0	2	0	1	1	1	0	1	3	3	0	0	2	2	2	0	0	0	0	0	1	2	2	2	1	0	1	1	0	3	2	0	0	2	0	1	2
OTU_1814	0	0	0	0	0	0	0	0	0	0	0	0	0	0	0	0	0	0	0	0	0	0	0	0	0	0	0	0	0	0	0	0	0	0	0	0	0	0	0	0	0	0	0	0	0	1	0	1	0
OTU_315	1	3	0	3	0	2	2	3	1	3	1	0	2	0	2	0	0	1	1	4	1	1	1	0	0	0	0	2	0	0	1	0	6	0	1	1	0	3	1	2	1	0	2	1	0	1	1	0	0
OTU_405	0	1	0	0	2	0	2	0	0	0	0	3	1	1	0	0	1	0	2	0	2	0	1	0	0	0	0	0	0	1	2	0	0	1	1	1	2	1	0	0	0	0	1	0	0	0	0	1	0
OTU_107	3	3	2	3	2	3	2	0	4	2	0	4	1	1	2	3	0	1	1	1	1	1	0	2	2	2	1	2	2	1	0	0	0	0	0	1	3	2	3	2	1	1	0	3	1	0	1	0	0
OTU_16	6	11	7	21	12	12	6	1	9	7	6	12	5	5	4	3	11	11	6	8	6	4	7	19	11	7	14	11	5	9	5	1	2	3	9	13	20	20	11	13	12	5	7	10	8	19	4	12	5
OTU_951	1	0	2	0	1	0	0	0	0	0	0	0	0	0	0	1	0	0	0	0	0	0	0	0	0	0	0	0	0	0	0	0	0	0	0	0	0	1	0	0	0	0	0	0	0	2	0	0	1
OTU_76	1	2	4	8	1	6	1	4	1	2	1	1	2	2	1	0	0	7	2	4	1	0	0	4	4	0	4	1	4	2	1	4	0	0	0	5	5	3	1	0	6	4	3	0	3	1	2	4	2
OTU_263	3	3	5	8	23	6	5	7	8	24	8	2	5	5	7	4	10	5	0	5	9	3	3	6	11	7	5	4	8	5	5	7	3	18	0	9	2	5	6	5	14	19	9	6	1	21	4	3	6
OTU_61	5	4	4	0	3	1	0	4	1	2	0	0	5	0	6	4	2	0	6	2	2	7	4	1	2	4	8	1	0	11	2	4	4	22	12	2	3	1	2	0	3	16	9	1	0	3	6	5	2
OTU_1081	0	0	0	1	1	3	1	0	1	1	0	0	0	2	0	1	1	1	0	2	0	1	0	0	0	0	1	0	2	1	1	0	0	3	3	2	0	0	1	0	0	0	0	0	2	0	1	0	0
OTU_1893	0	0	0	0	0	0	0	0	0	0	0	0	0	0	0	1	0	0	0	0	0	0	0	0	0	1	0	0	0	0	0	0	0	0	0	1	0	0	0	0	0	0	0	0	0	0	0	0	1
OTU_126	0	1	0	0	1	0	0	2	0	2	1	0	1	2	3	2	2	0	0	3	1	1	1	0	0	1	10	1	1	0	4	0	0	0	5	4	4	0	4	0	6	0	4	0	0	1	0	1	5
OTU_74	3	8	5	6	4	1	3	4	1	1	2	2	7	5	3	6	14	2	5	3	6	5	2	0	4	6	13	5	8	2	4	0	2	5	6	2	4	3	11	5	11	3	4	1	18	3	0	6	5
OTU_396	0	0	1	0	2	0	2	0	0	0	3	0	0	0	1	2	0	1	0	2	2	1	1	1	0	1	1	1	0	1	0	1	0	0	0	2	0	0	1	0	0	1	0	0	1	2	0	0	0
OTU_729	0	0	0	0	1	0	0	0	0	0	0	1	0	0	0	0	0	0	0	0	0	0	0	0	1	0	0	0	0	0	0	0	0	0	0	0	0	0	0	0	0	0	0	0	0	0	0	0	0
OTU_258	2	3	2	2	1	2	0	4	1	1	0	6	3	0	6	5	0	0	7	1	1	4	2	1	0	0	3	2	1	0	3	0	2	2	2	0	0	0	0	5	3	3	2	0	2	3	1	0	7
OTU_2124	0	0	0	0	0	0	0	0	0	0	0	0	0	0	0	0	0	0	0	0	0	0	0	0	0	0	0	0	0	0	0	0	0	0	0	0	0	0	0	0	0	0	0	0	0	0	0	0	0
OTU_848	0	0	0	0	0	0	0	0	0	0	0	0	0	2	1	1	0	0	0	1	0	0	0	0	1	1	0	1	2	0	0	0	0	0	0	0	0	0	0	0	0	0	0	0	1	1	1	0	0
OTU_24	1	10	4	4	2	5	6	5	3	1	3	4	1	1	4	6	5	3	8	2	9	6	9	4	4	5	4	2	6	3	7	7	5	4	3	3	2	6	6	1	1	6	11	2	4	5	14	8	3
OTU_414	0	0	1	1	0	2	0	1	1	1	2	0	1	0	0	0	1	1	1	0	0	0	0	0	1	0	2	1	0	0	0	0	1	1	1	0	3	0	0	0	0	0	0	2	1	5	0	0	0
OTU_419	0	0	1	0	6	0	0	0	0	3	1	0	0	1	2	1	2	0	1	1	2	1	0	0	0	0	0	0	0	0	1	1	3	0	2	2	1	0	1	3	0	0	3	1	2	2	3	2	3
OTU_10	7	4	14	8	8	7	15	8	7	8	16	4	7	12	12	4	5	11	13	15	28	11	12	10	8	8	9	12	7	5	26	5	12	15	13	5	9	9	14	13	24	8	10	7	6	8	12	12	21
OTU_93	15	4	12	9	27	11	14	13	19	24	14	14	9	18	14	7	9	22	10	11	15	5	15	15	14	13	7	11	16	18	15	11	14	15	6	24	12	12	24	12	14	7	14	9	13	6	21	6	8
OTU_82	0	2	1	3	1	3	3	5	1	1	4	1	2	2	0	2	3	0	1	2	2	1	6	1	2	5	0	4	2	3	0	2	3	3	2	1	4	5	2	0	0	1	7	2	1	1	3	3	3
OTU_266	3	0	1	2	0	1	2	2	1	0	0	1	1	0	0	0	2	0	1	0	0	0	1	0	4	1	0	3	0	1	1	1	0	1	0	1	4	3	2	1	0	5	0	2	2	0	2	1	0
OTU_778	1	0	1	1	2	0	0	0	0	0	0	0	2	0	0	1	1	2	0	0	3	2	0	0	1	0	0	0	4	2	0	0	0	2	0	1	0	0	0	0	0	1	1	0	0	1	0	0	1
OTU_502	1	0	2	0	0	4	0	0	0	2	0	2	0	0	0	1	0	0	0	0	0	0	0	1	0	3	0	1	0	0	0	0	0	2	0	0	0	1	0	0	0	0	0	1	0	0	0	0	0
OTU_1774	0	0	0	0	0	0	0	0	0	0	0	0	0	0	0	0	0	0	0	0	0	0	0	0	0	0	0	0	0	0	0	0	0	0	0	0	0	0	0	0	0	0	0	0	0	0	0	0	0
OTU_931	0	0	0	2	1	0	1	0	0	0	0	0	0	0	0	0	0	2	0	0	1	0	0	0	0	0	0	0	1	0	0	0	0	0	0	0	0	2	0	1	0	0	0	0	0	0	0	0	1
OTU_1938	0	0	0	0	0	0	0	0	0	0	0	1	0	0	0	0	0	1	0	0	0	0	0	0	0	0	0	0	0	0	0	1	0	0	1	0	0	1	0	0	0	0	0	0	0	0	1	1	0
OTU_545	1	1	0	1	2	2	1	3	1	3	4	1	2	1	1	1	0	5	1	2	0	0	2	6	1	3	0	4	4	4	1	4	1	4	1	2	1	1	0	1	0	1	0	3	4	1	3	2	1
OTU_97	0	1	2	0	0	3	2	6	1	4	3	6	0	3	1	1	3	3	0	3	1	3	1	3	0	1	0	2	7	1	1	7	1	3	1	4	2	2	3	0	2	6	1	1	4	2	4	0	0
OTU_794	0	1	0	0	0	0	0	1	0	0	0	0	0	0	0	0	1	0	0	0	1	0	0	0	0	0	0	0	0	0	0	0	2	0	0	0	0	0	0	0	0	0	1	0	0	0	0	0	1
OTU_98	5	2	1	3	3	2	0	5	2	1	1	20	0	1	1	0	0	2	0	0	0	0	1	2	0	1	0	6	0	2	0	3	0	0	0	1	0	0	2	1	2	1	0	6	2	1	4	2	1
OTU_406	0	0	3	0	0	1	0	0	0	1	0	0	2	0	0	0	0	0	2	0	0	3	1	4	0	4	0	0	0	1	0	1	0	10	0	3	0	2	0	0	1	2	0	0	1	1	3	0	0
OTU_386	3	3	0	1	1	0	1	1	2	1	0	1	1	0	1	1	3	0	1	1	1	4	1	1	4	0	1	0	0	0	1	0	1	5	5	1	1	3	1	1	2	0	0	1	0	1	0	1	1
OTU_845	0	0	0	0	0	0	0	0	3	1	0	0	1	0	0	0	0	0	0	0	1	0	0	1	0	0	0	0	0	0	0	0	0	0	0	0	0	1	0	0	0	1	0	0	0	8	0	0	0
OTU_155	4	1	2	2	1	7	3	3	4	0	3	3	2	2	0	1	1	6	4	1	0	0	2	0	3	8	1	3	4	6	0	0	0	0	0	1	4	3	0	6	1	2	2	0	0	2	0	4	8
OTU_27	4	2	0	7	0	2	4	2	2	8	1	2	4	4	3	3	1	8	0	3	1	1	10	13	9	2	1	4	4	5	4	5	1	9	1	4	2	4	1	4	3	13	1	5	2	3	8	2	0
OTU_2260	0	0	4	0	0	0	0	0	3	0	0	0	0	0	0	2	0	0	4	0	0	0	0	0	0	0	1	0	0	0	1	0	0	0	0	0	0	0	0	0	0	0	0	0	0	0	0	0	4
OTU_965	0	0	0	0	0	1	0	0	0	0	0	0	0	0	0	1	0	0	0	1	0	0	0	0	0	0	0	0	0	2	0	1	2	0	0	0	0	0	0	0	0	0	3	0	0	0	0	0	0
OTU_130	5	3	1	3	2	2	4	0	3	0	1	3	5	3	3	2	2	0	3	0	0	2	5	1	2	4	1	2	3	1	1	4	0	9	3	4	2	1	3	1	2	4	3	2	3	1	1	4	2
OTU_19	11	5	3	5	1	5	16	2	7	4	7	9	3	6	5	3	3	9	7	1	0	6	13	20	8	11	5	3	6	12	5	17	2	18	4	7	7	2	2	4	3	11	1	15	6	1	14	5	4
OTU_204	1	2	1	1	1	1	2	2	2	0	1	0	0	2	1	1	0	0	0	1	1	1	0	0	0	1	2	1	1	1	2	1	0	0	2	1	1	0	1	0	0	0	2	0	0	1	1	2	0
OTU_382	1	2	0	0	1	0	1	2	0	3	2	1	0	0	2	0	1	1	3	1	0	1	1	1	0	1	2	0	1	1	3	2	1	3	0	1	0	1	2	0	0	1	0	0	0	0	5	1	2
OTU_411	1	1	0	0	0	0	3	0	1	0	0	0	0	0	1	0	2	0	0	0	0	0	0	0	4	0	0	1	0	0	0	0	0	0	1	0	0	2	0	0	0	1	0	0	0	0	0	0	0
OTU_1475	0	0	0	0	0	0	0	2	0	0	0	0	0	0	0	0	0	0	0	0	0	0	0	0	0	0	0	0	0	0	0	0	0	0	0	0	0	0	0	0	0	0	0	0	0	0	0	0	0
OTU_174	4	1	2	2	0	0	2	0	2	3	0	1	1	1	2	6	0	0	2	2	0	5	3	2	0	2	1	4	0	1	1	0	4	1	1	1	1	1	0	0	1	2	2	1	0	3	0	0	2
OTU_704	2	3	2	1	0	0	0	1	0	1	0	0	0	0	0	1	0	1	0	0	0	0	0	0	0	2	0	0	0	0	0	1	0	0	0	2	1	1	0	0	1	0	1	1	0	0	1	0	0
OTU_677	0	0	3	0	0	0	0	1	3	0	0	0	1	0	0	0	1	0	0	0	0	1	0	2	0	0	1	0	1	1	1	2	1	2	0	1	2	1	1	1	2	3	2	1	0	1	0	0	2
OTU_801	0	0	0	1	0	0	3	1	0	0	0	3	0	0	0	0	1	1	1	0	0	0	0	0	0	0	0	0	2	0	0	0	0	0	0	0	1	0	1	0	0	0	0	0	0	0	0	0	0
OTU_111	7	7	1	2	6	8	6	7	3	6	1	2	4	8	17	6	2	3	5	7	0	1	5	9	4	2	6	1	3	9	5	6	2	1	4	5	4	6	0	2	2	2	5	8	3	3	1	5	2
OTU_1038	1	1	3	1	0	0	0	1	0	0	1	0	0	0	1	2	1	0	0	0	0	0	0	0	0	0	0	0	0	0	0	0	0	1	0	0	0	0	0	0	0	0	0	0	0	1	0	1	0
OTU_63	0	3	3	0	2	0	1	1	2	6	0	1	2	2	0	3	1	9	3	1	0	2	0	2	1	5	4	1	1	0	0	0	2	1	2	4	9	0	0	0	4	0	1	0	4	8	1	0	3
OTU_1441	0	0	0	2	3	0	0	0	0	1	0	0	0	0	0	0	0	0	0	1	0	0	0	1	1	0	0	0	0	0	0	0	0	1	0	0	0	3	0	0	0	1	0	0	0	1	1	0	0
OTU_71	6	9	10	7	7	5	1	5	4	5	6	2	2	15	12	5	11	4	11	4	5	23	1	12	3	3	6	5	0	2	4	3	10	2	5	5	3	3	1	3	6	17	18	3	6	2	6	5	10
OTU_510	1	0	1	0	0	0	0	0	0	1	0	0	0	0	0	0	0	0	1	0	0	1	0	0	0	0	0	0	0	0	1	0	0	0	0	1	1	0	0	1	1	0	0	0	0	0	0	0	0
OTU_558	0	0	3	3	0	0	1	0	1	0	0	1	0	4	4	1	0	0	4	0	0	1	0	0	0	0	0	1	0	0	0	0	0	0	0	0	1	1	0	0	0	0	2	0	0	1	0	0	0
OTU_197	5	2	0	0	1	3	2	2	1	6	1	7	0	2	0	0	1	9	1	8	1	2	4	3	5	10	1	2	0	1	2	0	1	1	2	5	4	6	0	0	0	0	1	38	0	1	9	3	0
OTU_1523	0	0	0	0	0	0	0	0	0	0	0	0	0	0	0	0	0	0	0	0	0	0	0	0	0	0	1	0	0	0	0	0	0	0	0	0	0	1	0	0	0	2	0	0	0	0	0	0	0
OTU_55	3	5	0	3	3	5	7	3	6	8	3	5	3	1	7	2	0	4	3	3	4	8	6	5	5	1	4	5	3	6	3	14	4	1	4	3	6	3	7	2	2	2	1	5	6	2	4	3	3
OTU_1894	0	1	0	0	0	0	0	0	1	0	0	0	0	0	0	0	0	0	0	0	0	0	0	0	0	0	0	0	0	0	0	0	0	0	0	0	0	0	0	0	0	0	0	0	0	0	0	0	1
OTU_200	7	1	6	5	2	3	5	3	4	6	6	5	0	2	5	2	5	7	3	5	2	2	6	3	7	5	2	5	8	3	1	2	0	5	1	4	6	3	3	3	2	6	0	6	8	3	8	3	2
OTU_166	0	0	2	3	1	2	4	0	2	2	2	3	1	1	6	1	0	4	3	0	0	1	0	1	2	4	1	3	1	0	1	2	0	1	2	1	2	6	0	1	0	2	2	4	3	0	5	3	1
OTU_65	2	5	4	2	4	6	4	6	4	6	2	5	3	1	4	4	3	10	4	3	4	1	4	9	6	5	5	5	8	9	5	10	4	4	7	8	3	2	6	6	6	2	2	9	6	6	6	6	3
OTU_1018	2	0	0	0	0	0	2	0	0	0	0	0	0	0	0	0	0	1	1	0	0	0	1	3	1	0	2	1	0	0	0	1	0	2	0	1	0	0	1	2	0	1	0	2	1	0	0	0	0
OTU_85	8	11	0	5	2	5	1	2	2	0	3	4	3	4	2	5	3	0	3	2	2	3	6	2	6	6	3	6	0	6	6	10	5	2	2	0	1	4	3	4	5	3	3	0	3	3	1	6	4
OTU_800	2	0	0	1	1	0	0	0	1	0	0	0	0	0	0	1	0	0	0	1	0	2	0	0	0	0	2	1	0	0	1	0	0	0	0	0	0	0	0	0	0	0	2	2	0	1	0	3	1
OTU_1332	0	0	0	0	0	0	0	0	0	0	0	0	3	0	0	1	0	0	0	0	0	0	0	0	0	0	0	0	1	0	1	0	0	0	0	0	0	0	0	0	0	0	0	0	0	0	0	0	0
OTU_149	9	2	3	2	5	2	4	1	3	0	3	11	3	11	0	5	3	2	7	6	5	3	0	2	3	3	7	4	7	3	1	0	2	4	10	3	4	1	5	1	2	2	2	1	4	1	1	3	7
OTU_163	1	5	4	0	0	0	0	1	2	2	0	2	16	3	5	5	5	0	4	4	3	5	2	2	0	0	9	0	0	2	1	1	56	1	6	0	1	1	0	2	6	1	19	1	1	1	0	6	2
OTU_362	3	1	4	3	5	1	2	7	4	3	5	3	1	4	0	3	2	6	2	3	5	1	2	1	1	4	2	2	6	1	2	2	1	4	2	3	3	2	2	7	3	1	0	3	0	8	2	2	0
OTU_2351	1	0	0	3	0	1	1	0	1	0	2	2	1	6	2	4	2	0	5	0	1	1	0	0	1	3	3	4	0	1	0	0	3	3	1	0	3	0	0	1	0	3	2	0	0	3	0	0	2
OTU_156	0	1	0	0	3	0	0	2	1	0	0	0	5	1	0	1	3	0	2	2	2	2	0	0	0	0	5	0	0	0	2	0	1	0	2	2	0	0	1	1	1	0	0	0	1	0	0	2	3
OTU_67	2	2	2	0	0	4	1	13	4	3	2	7	3	1	0	2	2	0	1	2	3	6	3	0	2	1	3	0	1	5	7	4	4	3	4	2	6	1	0	1	3	1	4	0	3	6	1	7	5
OTU_750	1	1	0	1	0	0	0	0	0	0	0	1	1	0	0	0	0	0	0	0	0	1	0	0	0	1	0	1	1	0	0	0	0	0	0	0	2	0	0	0	0	0	0	1	3	0	3	0	0
OTU_221	3	0	1	2	1	0	3	0	3	0	0	2	0	0	0	1	4	1	1	2	0	2	0	1	1	1	4	1	2	1	3	0	3	4	0	2	1	1	2	1	2	2	1	0	3	0	2	4	1
OTU_342	1	2	1	0	1	0	0	0	2	0	0	2	0	1	0	0	0	1	0	1	0	0	1	1	0	1	0	0	0	0	0	0	0	2	0	0	2	0	0	1	0	0	0	1	0	0	1	0	0
OTU_2080	0	0	0	0	0	1	1	0	0	0	0	0	0	0	0	0	0	1	0	0	0	0	1	0	0	0	0	0	0	0	0	0	0	0	1	0	0	1	0	0	0	0	0	1	0	1	0	0	0
OTU_2443	0	0	0	0	0	1	0	0	0	0	0	1	0	0	0	0	0	0	0	0	0	0	0	1	0	0	0	0	0	0	0	0	2	0	0	0	0	0	0	0	0	0	2	0	0	0	0	0	0
OTU_206	1	0	1	0	1	0	0	1	1	0	0	1	0	3	2	3	1	1	1	1	1	4	1	1	2	3	6	3	0	2	0	0	3	0	1	0	1	3	0	1	1	1	1	0	1	0	0	1	2
OTU_1359	0	1	0	0	0	0	0	1	0	0	0	2	0	0	0	0	0	0	0	0	2	0	1	0	0	2	0	0	0	1	0	1	2	0	2	0	0	1	0	1	0	0	0	0	0	0	1	0	1
OTU_602	4	3	2	5	8	1	7	8	5	2	6	2	7	3	3	7	9	8	4	2	1	7	11	2	7	3	5	1	6	2	7	3	8	3	5	4	7	8	9	4	12	3	8	8	7	9	9	5	6
OTU_2401	0	0	0	0	0	1	0	0	0	1	0	0	0	0	0	0	0	0	0	0	0	0	1	0	0	0	0	0	0	0	0	0	0	0	0	0	0	0	0	0	1	0	0	0	0	0	0	0	0
OTU_1022	3	0	0	1	0	0	2	0	0	0	0	1	0	0	1	0	0	0	0	0	0	0	0	0	0	1	0	0	0	1	1	0	0	0	0	0	0	0	0	3	0	0	0	0	0	1	0	0	1
OTU_377	2	1	1	0	0	0	0	2	0	0	1	1	0	1	2	0	3	0	0	0	0	0	1	0	0	0	0	1	0	1	2	1	1	1	0	0	0	0	1	1	0	1	0	1	0	0	0	0	0
OTU_7	17	23	9	19	17	15	9	16	23	10	25	17	19	14	17	21	18	15	14	11	17	12	7	13	16	13	32	8	23	5	10	12	16	10	13	16	25	20	23	23	21	9	26	19	23	17	10	15	10
OTU_391	1	0	0	0	3	2	2	2	1	2	0	5	0	2	0	1	1	4	0	0	0	0	2	0	0	0	1	1	1	2	0	0	1	2	0	5	1	2	1	0	2	0	0	0	1	1	1	0	0
OTU_139	1	3	1	0	0	3	3	2	3	4	1	0	3	2	1	2	1	1	5	3	1	1	2	2	1	1	0	0	0	7	1	4	1	2	4	1	0	1	1	2	2	3	0	2	1	4	1	5	0
OTU_915	0	1	0	0	0	0	0	0	0	0	2	0	0	0	1	0	0	0	0	0	0	0	0	0	0	1	0	2	1	0	0	0	0	2	0	0	0	0	0	0	0	0	0	0	1	0	0	0	0
OTU_18	5	6	12	14	8	5	4	8	7	11	13	6	4	8	9	3	14	6	5	11	22	16	11	8	5	4	2	4	8	6	9	12	9	3	11	14	20	6	7	15	19	4	11	9	7	13	10	7	6
OTU_651	0	0	0	1	0	0	0	0	0	0	0	0	0	0	1	0	0	0	0	0	0	0	2	0	1	0	0	0	1	0	0	0	1	2	0	0	0	0	0	5	3	0	1	1	0	1	1	0	0
OTU_17	6	2	0	6	9	6	6	0	12	3	4	5	6	7	3	4	8	2	5	3	0	3	2	2	7	3	12	7	3	2	4	0	5	5	1	6	2	10	4	6	1	7	1	2	4	7	3	3	4
OTU_1539	0	0	0	1	0	0	0	0	0	0	0	0	0	0	0	0	0	0	0	0	0	0	0	0	0	0	0	0	0	0	0	0	0	0	0	0	0	0	0	0	0	0	0	0	0	0	0	0	0
OTU_178	1	1	0	4	1	2	2	0	1	2	0	1	0	1	1	0	0	3	0	0	0	0	1	0	2	1	1	1	1	1	0	0	1	1	0	0	2	1	0	0	0	0	0	2	2	2	1	0	0
OTU_90	3	2	5	1	1	2	4	1	2	3	0	3	1	4	3	1	1	1	2	0	2	2	6	5	0	3	2	0	1	5	2	4	4	7	0	12	2	4	0	3	3	4	5	0	0	3	1	1	18
OTU_134	3	0	0	0	2	4	4	0	0	3	0	0	0	1	0	0	1	1	4	0	0	0	0	2	2	5	1	0	1	1	1	3	4	2	0	3	1	3	0	4	0	0	1	4	1	2	2	0	0
OTU_269	3	1	8	4	7	5	4	12	5	5	4	1	4	4	7	5	13	10	5	21	17	12	8	6	3	1	8	4	6	6	16	5	8	5	3	4	8	4	10	5	21	6	23	7	4	12	13	17	7
OTU_46	3	8	4	1	2	4	1	6	3	0	4	2	6	3	4	7	3	4	8	4	4	12	3	11	0	3	6	2	5	3	9	7	2	1	6	4	3	2	4	3	2	1	4	0	1	1	2	4	9
OTU_434	2	2	5	3	2	1	0	3	4	1	3	1	2	1	4	2	0	5	3	5	4	0	6	1	0	0	0	0	2	1	0	3	4	5	4	1	1	0	5	5	4	7	5	2	0	1	3	3	0
OTU_33	3	3	1	4	4	5	2	3	2	2	7	1	1	3	3	2	2	5	2	5	3	1	3	4	7	1	4	9	2	4	2	4	3	0	3	4	6	3	2	3	1	1	0	3	2	0	6	1	3
OTU_227	0	0	0	0	6	1	0	1	1	1	1	0	2	0	1	4	2	0	0	3	1	6	2	0	1	0	1	0	0	5	2	2	4	3	5	7	0	0	1	3	1	5	0	0	0	8	0	2	16
OTU_254	2	2	2	1	3	0	0	2	1	0	0	0	3	2	1	7	4	0	1	2	2	4	4	0	0	0	1	0	1	1	3	1	0	0	5	3	2	0	0	1	5	0	2	0	0	0	0	0	1
OTU_2347	1	1	0	1	0	2	0	1	1	2	1	1	1	0	0	0	4	0	0	1	0	1	0	2	0	0	1	0	1	1	2	0	0	3	0	0	0	0	0	0	0	0	0	0	1	2	1	1	0
OTU_138	0	3	0	0	1	1	0	0	0	0	5	1	1	0	1	0	2	0	3	0	0	0	0	0	0	3	3	1	2	0	1	0	2	0	0	0	1	0	0	1	1	0	0	0	0	1	1	1	1
OTU_283	0	1	0	2	0	1	1	0	0	1	2	2	1	0	0	0	0	0	1	0	0	0	0	5	1	2	0	2	2	1	0	1	0	4	1	1	1	0	1	0	0	3	1	1	0	1	2	0	1
OTU_56	3	8	4	7	1	4	5	3	8	9	0	2	6	6	6	2	3	2	2	0	2	3	7	2	2	5	3	9	3	3	4	5	3	13	3	2	0	7	4	4	3	10	3	2	8	3	5	6	2
OTU_1140	1	0	0	0	0	1	0	0	0	0	0	0	0	0	0	0	1	0	0	0	0	0	0	0	0	0	0	0	0	0	0	0	0	0	0	0	0	0	0	0	0	0	0	0	0	0	0	0	0
OTU_116	1	1	2	0	2	1	0	2	10	0	2	0	5	2	2	9	3	1	2	8	2	0	2	0	4	3	7	2	6	2	4	0	4	0	2	0	0	0	1	3	3	1	1	0	3	0	2	4	4
OTU_1051	0	0	0	0	0	0	0	0	0	0	0	0	0	1	0	0	0	0	0	0	0	0	0	1	0	0	0	2	0	0	0	0	0	0	1	0	1	0	0	1	1	0	0	0	0	0	0	0	0
OTU_215	2	2	0	0	0	4	1	0	0	0	2	0	1	0	0	0	0	3	0	0	1	0	0	0	1	3	2	2	0	0	0	1	0	1	0	1	3	3	1	0	0	1	0	0	0	0	2	0	0
OTU_868	0	0	0	0	0	0	0	1	0	3	0	0	2	1	0	0	0	1	1	0	0	0	1	0	1	0	0	1	1	0	0	1	3	2	0	4	1	0	0	0	2	0	0	0	0	2	1	1	0
OTU_21	7	14	11	4	7	4	2	7	7	7	7	6	14	8	6	2	2	8	5	12	5	4	5	14	13	2	6	9	17	5	7	4	6	1	9	1	5	10	3	7	8	6	11	3	7	4	3	4	6
OTU_244	3	2	3	4	4	1	0	6	0	1	3	2	0	1	1	6	4	2	7	1	6	2	4	1	2	5	0	4	4	7	3	2	2	5	0	2	3	2	3	3	2	1	2	6	1	3	4	2	1
OTU_1156	1	1	0	1	2	2	0	0	1	0	0	1	2	1	0	0	0	0	2	0	0	0	1	1	5	2	3	0	0	0	0	0	3	0	1	2	1	0	1	0	1	0	0	1	0	0	0	0	1
OTU_746	0	0	0	0	1	0	0	2	1	0	1	2	0	0	0	0	3	1	0	0	0	0	0	0	1	1	1	2	0	0	0	0	0	0	0	0	0	0	0	0	0	1	0	0	0	0	0	0	0
OTU_32	7	15	12	7	7	10	0	9	8	7	2	4	15	13	19	7	13	9	9	10	5	22	4	5	4	2	6	2	12	2	13	9	6	1	10	4	3	3	4	11	7	4	6	2	7	12	9	7	15
OTU_291	1	4	1	3	0	3	3	0	6	0	0	1	0	0	0	0	1	1	4	4	0	1	1	1	1	0	1	2	0	3	1	0	0	8	1	0	2	1	2	3	7	1	1	0	3	0	1	1	3
OTU_440	0	3	4	2	2	2	0	2	0	0	0	0	0	1	0	1	0	0	3	0	1	2	0	0	0	0	0	0	0	1	0	1	0	0	0	0	1	2	0	1	0	0	2	0	0	0	0	1	0
OTU_2073	0	1	0	2	0	1	1	1	0	2	1	0	0	1	0	0	0	0	0	1	0	0	2	2	3	0	1	1	1	0	0	1	0	0	0	1	1	0	1	1	0	3	0	1	5	0	2	0	0
OTU_196	0	0	1	0	0	0	0	1	2	1	0	0	2	0	1	1	0	0	1	0	8	0	2	0	0	0	3	4	0	1	0	2	1	5	0	0	0	0	0	0	0	11	0	0	0	1	0	0	2
OTU_500	0	0	0	0	1	0	0	2	0	0	0	0	0	0	1	0	2	1	1	0	0	0	0	0	0	0	0	3	1	1	0	0	0	2	0	0	0	0	0	0	1	0	0	3	0	0	0	0	1
OTU_788	0	0	0	0	0	0	0	0	1	0	0	0	0	0	0	0	0	0	0	0	0	0	2	0	0	0	0	0	0	0	0	1	0	1	1	0	0	0	0	0	0	0	0	0	0	0	0	0	0
OTU_88	2	0	0	3	2	3	6	1	1	6	4	6	4	0	0	2	1	7	1	3	1	2	5	2	5	5	1	1	0	3	3	0	1	0	2	2	3	5	1	0	0	0	3	2	3	3	6	3	3
OTU_1047	0	0	0	1	0	0	1	0	0	0	0	0	1	0	0	0	0	0	0	0	0	1	0	1	0	0	0	0	0	0	0	0	0	0	0	0	1	0	0	0	0	0	0	1	0	0	0	0	0
OTU_305	4	3	0	1	1	2	0	4	1	2	1	2	2	0	2	3	1	1	2	2	0	2	0	1	2	3	4	1	2	4	7	0	1	0	0	2	4	1	3	1	2	0	3	0	0	1	2	0	3
OTU_2428	1	1	0	0	0	1	2	0	0	1	1	2	0	0	0	2	1	0	0	0	1	0	0	0	0	0	0	0	1	0	1	1	0	1	0	2	0	0	0	0	0	0	4	0	1	0	3	1	0
OTU_445	2	2	3	2	1	2	2	1	2	0	1	1	1	0	1	2	0	1	1	0	0	3	0	0	0	1	0	1	1	1	1	0	1	1	0	1	2	1	2	2	2	2	1	1	0	0	0	0	1
OTU_150	7	7	4	2	2	5	3	4	1	5	6	3	8	4	7	1	5	10	3	5	2	2	8	6	3	1	2	1	5	8	3	10	0	6	4	4	2	5	5	8	3	7	2	3	6	3	0	1	1
OTU_34	3	5	5	8	9	3	4	1	9	9	6	3	4	1	5	4	4	1	4	8	6	6	5	4	5	5	9	2	7	3	6	2	7	2	5	6	4	4	5	1	5	1	1	10	12	5	1	1	3
OTU_374	0	0	1	1	0	0	1	1	0	2	3	2	0	0	0	1	0	3	0	0	0	0	1	0	0	0	0	1	1	0	0	0	0	5	0	0	0	0	0	0	0	3	0	2	0	0	0	0	0
OTU_461	3	1	1	1	2	0	0	0	1	1	1	0	0	1	1	2	1	3	2	1	0	0	0	2	1	1	0	0	0	0	0	1	0	1	2	3	0	1	1	3	2	0	3	0	2	3	1	3	2
OTU_225	1	1	3	5	1	0	1	1	3	10	3	6	1	1	0	1	2	2	0	2	3	1	0	4	1	1	3	1	0	2	2	2	2	2	1	1	2	2	1	3	5	1	2	4	5	3	1	1	0
OTU_140	3	5	3	1	2	4	7	2	5	1	3	5	6	9	0	4	2	10	3	2	1	10	6	1	3	2	8	5	1	8	3	2	7	3	7	9	1	4	0	3	1	9	4	7	6	4	3	4	6
OTU_694	0	3	2	0	0	1	0	0	2	0	0	0	2	0	0	0	1	0	0	0	0	0	1	0	0	0	0	0	0	0	4	0	0	0	3	0	0	0	3	0	0	0	1	0	1	0	0	1	1
OTU_43	3	3	3	0	1	1	1	3	5	2	1	4	7	2	3	5	5	3	2	3	6	1	0	1	5	2	6	6	6	2	1	2	14	0	5	1	3	3	9	3	3	0	1	1	5	5	2	4	1
OTU_83	3	3	2	3	3	2	4	2	3	3	3	1	0	2	1	1	1	3	0	2	0	0	0	1	1	5	0	5	1	1	1	3	1	9	1	1	3	3	1	2	3	1	0	0	1	2	5	2	4
OTU_45	2	5	1	9	3	1	0	0	2	6	3	0	0	3	5	0	0	0	2	2	2	1	0	2	5	1	2	5	0	1	1	0	0	13	0	1	4	4	2	1	1	13	1	5	6	3	3	2	1
OTU_2224	0	0	0	1	1	0	0	0	0	0	0	1	0	0	0	0	0	1	0	0	3	0	0	0	2	0	1	0	0	0	1	0	0	1	0	0	0	1	0	0	0	1	1	0	1	2	0	0	0
OTU_255	0	0	0	1	0	0	0	1	1	0	0	0	2	1	0	0	2	0	0	2	1	1	0	0	0	0	1	0	3	0	1	0	0	0	8	0	0	0	1	0	2	0	0	0	0	1	0	1	2
OTU_680	0	1	1	0	0	0	0	0	0	1	0	0	0	0	1	0	0	0	0	0	1	0	0	0	0	0	0	0	0	0	0	0	1	0	1	0	1	0	0	0	2	2	0	3	0	1	0	0	1
OTU_81	0	3	2	1	2	1	2	2	2	5	0	1	1	1	2	4	2	2	4	1	1	7	6	4	0	2	2	0	5	4	3	5	3	3	0	3	2	0	1	2	1	3	1	0	0	0	3	3	4
OTU_117	2	2	2	2	2	1	1	0	1	0	1	1	2	2	6	5	1	0	3	1	1	5	4	1	1	2	1	1	1	0	1	1	0	1	0	1	3	1	0	0	3	0	0	0	0	0	0	2	7
OTU_124	2	1	1	3	2	2	3	6	3	5	0	2	4	5	0	4	0	2	1	1	3	7	2	1	1	8	0	3	3	5	4	1	0	2	1	1	3	2	7	1	5	6	1	2	1	1	2	4	3
OTU_102	5	2	0	10	11	8	8	1	4	0	9	7	0	8	5	1	1	1	6	5	2	2	0	5	12	16	6	8	1	0	3	0	2	0	2	6	8	8	2	7	1	0	2	3	9	5	3	4	3
OTU_295	0	3	2	0	0	2	0	0	0	0	1	1	0	0	0	3	1	0	2	1	1	0	0	1	1	0	1	0	0	0	0	0	2	0	2	0	0	1	0	1	0	1	1	0	0	0	1	0	2
OTU_456	1	2	0	3	1	1	1	0	0	3	5	0	1	1	0	0	1	1	1	0	1	3	0	3	1	2	1	2	0	1	2	1	0	2	0	0	1	1	1	1	2	3	0	0	1	3	2	0	4
OTU_41	0	5	2	4	3	0	2	10	0	0	1	2	8	4	6	8	4	0	5	9	20	9	1	1	3	2	10	1	3	4	14	0	16	0	13	2	2	1	4	4	8	0	5	1	0	6	2	9	5
OTU_815	0	0	2	2	2	3	3	0	2	5	0	2	0	1	1	1	0	8	0	0	0	3	5	7	1	4	0	3	4	8	0	6	1	1	0	5	0	4	0	1	0	0	0	6	0	1	6	2	1
OTU_182	5	0	0	3	1	3	1	1	2	1	2	7	4	0	1	1	1	7	1	4	2	3	3	3	1	3	3	1	6	7	2	3	2	2	0	0	0	0	2	2	4	0	1	3	1	2	0	1	1
OTU_40	7	6	8	16	6	9	13	23	21	14	9	10	11	12	11	14	5	12	5	9	13	4	13	13	11	14	2	12	12	15	11	18	12	12	10	8	18	13	9	21	18	15	22	21	10	10	16	11	9
OTU_1838	0	0	0	0	0	1	0	0	0	0	0	0	0	0	0	0	0	0	0	0	0	0	0	0	0	0	0	1	0	0	0	1	0	0	1	0	0	0	0	0	0	0	0	0	0	0	1	2	0
OTU_251	0	2	2	0	0	0	6	1	0	0	0	1	1	0	1	6	0	2	1	2	0	4	0	1	0	0	0	1	0	1	2	2	2	1	0	0	0	1	0	0	1	0	0	0	0	0	0	0	1
OTU_84	4	4	1	5	7	6	8	2	1	2	1	10	1	4	1	1	3	3	0	0	1	1	3	0	3	9	2	0	1	1	0	2	2	0	1	4	3	6	1	0	2	2	0	7	1	3	1	2	0
OTU_619	3	4	1	1	2	2	3	6	5	1	2	0	0	2	0	3	1	4	2	2	2	5	5	7	7	1	2	6	4	8	4	8	1	8	2	12	1	3	4	3	1	2	2	4	3	6	10	2	2
OTU_31	10	9	3	7	8	11	13	7	12	9	8	16	7	16	6	6	13	18	6	7	9	11	8	3	10	13	8	10	10	3	16	7	4	13	9	11	15	7	14	3	13	11	13	19	8	14	7	13	5
OTU_92	2	3	7	1	3	1	7	3	1	5	5	6	3	4	7	5	1	2	6	3	3	5	6	8	2	1	2	1	3	12	1	9	2	4	0	1	12	3	0	3	7	3	3	2	2	4	5	3	2
OTU_237	0	1	0	2	0	0	0	2	0	1	0	0	0	0	13	0	0	0	0	0	0	0	0	0	0	0	0	0	0	0	25	0	0	0	0	0	0	0	0	0	0	0	0	0	0	0	0	0	0
OTU_343	2	0	1	3	2	1	1	1	2	14	1	3	1	4	1	2	2	0	1	1	3	1	2	1	3	6	1	2	1	3	0	1	2	1	0	1	1	6	2	0	2	5	0	2	2	2	2	0	2
OTU_472	1	1	1	0	0	0	0	0	1	2	1	1	1	0	1	1	0	0	4	0	0	1	0	0	0	0	0	1	0	0	1	1	0	1	2	0	0	0	0	1	1	1	1	0	2	0	0	0	1
OTU_526	0	0	0	0	1	0	0	0	0	1	0	0	0	0	0	0	1	0	0	0	0	0	0	0	1	0	0	0	0	0	0	0	0	0	0	0	0	1	0	0	0	0	0	0	3	1	2	0	0
OTU_49	17	10	7	16	10	4	9	8	14	8	7	9	9	7	4	6	4	9	10	7	4	3	8	24	17	4	6	8	12	13	7	34	4	15	7	9	8	15	7	6	8	20	5	11	12	8	17	6	2
OTU_346	0	1	0	1	1	0	1	1	1	1	1	2	0	1	0	4	1	2	0	1	0	0	0	0	0	0	0	2	3	0	1	1	0	0	0	0	1	2	2	1	1	0	0	0	0	0	0	0	0
OTU_812	0	1	0	0	0	0	0	0	0	0	0	1	0	0	0	0	0	1	0	0	0	0	0	1	0	1	0	1	0	0	0	0	0	0	0	0	0	0	0	0	0	0	0	2	2	0	0	0	0
OTU_782	0	0	0	1	1	0	0	1	0	0	0	0	3	0	0	1	1	0	0	0	0	0	1	0	0	0	1	1	2	0	2	0	4	0	0	2	0	0	0	1	1	0	1	1	1	0	1	2	1
OTU_460	0	1	1	0	1	0	0	0	0	0	1	0	4	0	0	2	0	0	2	1	3	0	1	0	0	1	2	1	2	0	1	0	0	0	0	2	1	0	2	0	0	1	0	0	0	1	0	1	2
OTU_325	2	6	8	3	3	6	5	2	2	2	2	1	1	3	10	3	6	6	4	1	3	12	3	10	4	6	0	4	3	3	1	0	5	3	2	0	6	2	1	4	2	0	4	1	1	2	9	2	4
OTU_1576	0	0	0	0	0	0	0	0	0	0	0	0	0	0	0	0	0	0	0	0	0	0	3	0	0	0	0	0	0	0	0	0	0	0	0	0	0	0	0	0	0	0	0	0	0	0	0	0	0
OTU_160	2	0	0	3	0	1	2	4	3	1	1	0	0	2	0	0	0	2	1	1	1	0	0	2	3	4	0	4	0	1	0	1	0	1	0	2	2	7	0	1	3	0	0	6	4	4	1	0	1
OTU_260	3	0	4	3	1	1	0	1	0	2	1	2	0	0	0	2	0	6	0	1	2	0	1	5	6	2	3	2	2	1	2	2	1	2	1	0	4	1	0	1	0	3	1	1	0	2	2	0	1
OTU_1521	3	0	0	0	0	0	0	0	0	0	0	0	3	1	0	2	2	0	0	2	1	0	0	0	1	0	0	0	0	0	4	0	0	2	1	0	0	0	0	1	1	0	1	0	1	0	0	0	1
OTU_132	2	1	1	1	1	0	2	2	0	1	1	2	2	1	3	1	4	2	3	3	1	3	1	0	3	2	1	0	2	1	1	0	4	2	6	2	6	1	2	3	3	0	1	3	3	5	3	2	1
OTU_1395	1	0	0	0	0	0	0	0	0	0	0	0	0	0	0	0	0	0	0	0	1	0	0	0	0	0	0	0	0	0	0	0	0	0	0	0	0	0	0	0	0	0	0	0	0	0	1	0	0
OTU_893	0	0	0	0	1	2	0	0	0	1	0	1	0	0	0	0	0	0	0	0	0	0	0	1	1	2	0	0	0	0	0	0	0	0	0	0	1	0	0	0	0	0	0	0	0	1	0	0	0
OTU_2460	0	0	0	0	0	0	0	0	0	0	0	0	0	0	0	0	0	0	0	0	0	0	0	4	0	0	0	0	0	0	0	0	0	0	0	0	0	0	0	0	0	0	1	0	0	0	0	0	0
OTU_493	0	1	3	0	0	0	2	0	0	0	0	0	1	0	0	3	1	0	4	1	1	0	0	0	0	0	2	2	0	0	0	0	2	0	1	0	0	1	0	2	0	0	2	0	0	0	0	1	4
OTU_1252	1	3	0	2	1	0	2	0	2	3	0	1	0	2	1	0	1	1	0	1	0	0	0	0	1	0	0	0	2	0	1	3	1	0	0	1	2	0	2	5	0	0	0	0	0	1	7	0	0
OTU_1494	0	1	1	1	0	0	1	0	0	1	0	0	0	0	0	0	0	0	0	0	0	0	0	0	0	0	0	0	0	1	0	0	0	0	0	0	0	0	2	0	0	0	0	0	0	0	0	0	0
OTU_356	1	0	0	0	1	0	0	8	3	0	0	3	0	1	0	2	0	0	2	0	0	0	0	3	1	1	0	0	0	1	0	1	0	1	0	0	0	1	1	1	0	2	0	2	1	1	1	0	1
OTU_348	2	0	2	2	3	2	2	2	2	5	0	0	0	1	1	1	0	3	2	1	0	2	4	1	1	1	0	2	4	2	1	2	1	3	0	5	0	5	3	2	1	2	1	4	2	2	3	0	1
OTU_423	0	2	5	0	0	0	0	0	3	0	1	0	4	2	1	3	4	0	3	12	6	5	0	0	0	0	6	0	0	0	2	0	7	0	6	0	0	0	2	1	1	0	5	0	0	1	0	9	7
OTU_47	2	2	2	2	3	1	8	2	4	4	6	3	2	0	7	0	0	4	2	2	0	2	2	1	8	6	2	2	0	0	0	3	3	3	0	10	7	6	2	7	2	7	0	12	3	8	0	2	2
OTU_444	0	1	0	0	0	1	0	0	2	0	2	1	0	0	0	0	2	1	0	0	0	0	0	0	0	0	1	0	0	0	0	0	0	1	2	0	0	0	1	0	0	0	3	0	0	0	2	0	1
OTU_112	3	3	7	3	8	7	7	4	3	9	3	2	0	5	7	3	5	4	4	3	6	8	3	3	3	7	5	6	6	3	2	6	11	18	4	11	5	8	6	5	4	11	3	3	5	10	5	4	2
OTU_896	0	0	0	3	0	0	0	0	0	2	0	2	0	0	0	0	0	0	0	2	0	0	1	0	2	4	0	1	0	1	1	1	1	0	1	1	0	0	1	0	0	0	1	3	0	0	2	1	0
OTU_891	1	1	0	1	1	0	0	0	0	0	2	2	3	0	1	0	0	1	1	0	0	1	0	1	0	0	1	0	0	0	0	2	1	0	1	1	2	0	1	0	0	1	1	2	0	0	0	0	0
OTU_1145	1	2	2	3	0	0	1	5	0	1	2	0	3	1	1	3	1	1	1	3	1	3	2	0	1	1	1	2	1	4	4	1	1	0	2	0	0	0	3	1	0	1	0	0	0	4	2	3	2
OTU_1265	0	0	0	1	0	0	0	0	0	0	0	0	0	0	0	0	0	0	0	0	1	0	0	0	1	1	0	0	0	1	0	0	0	0	1	0	0	0	0	0	0	1	0	0	1	4	0	0	0
OTU_64	2	4	9	1	9	2	1	12	3	1	3	1	6	8	5	11	16	2	8	11	9	13	7	2	0	2	4	8	9	8	18	3	10	0	18	5	2	5	5	2	10	4	12	3	3	6	2	4	5
OTU_365	1	4	1	1	1	0	3	0	0	0	1	0	1	1	0	0	1	0	0	1	3	0	0	1	5	1	0	2	4	0	0	2	1	4	0	3	0	1	0	0	0	0	2	1	1	0	0	0	1
OTU_2298	0	0	0	0	0	0	0	0	0	0	0	0	0	0	0	0	0	0	0	0	0	2	0	0	0	0	1	0	0	0	1	0	0	0	0	0	0	0	0	0	0	0	0	0	0	0	0	0	0
OTU_464	0	0	0	2	1	1	0	1	0	0	0	0	2	0	1	0	2	0	4	2	0	1	0	0	0	1	4	1	0	1	0	0	0	0	0	2	0	0	0	0	2	0	0	0	0	0	0	2	1
OTU_194	2	2	2	3	1	1	6	5	2	5	2	2	5	4	2	1	2	1	2	6	2	1	4	2	3	3	1	1	3	1	3	3	3	5	4	2	1	1	5	3	0	6	1	0	0	2	2	2	0
OTU_281	2	0	4	0	0	0	0	2	2	0	2	0	5	2	1	3	0	0	3	2	7	5	2	0	0	0	1	1	0	1	1	0	1	1	0	0	0	1	0	1	1	0	0	5	2	0	0	3	7
OTU_187	0	0	0	1	0	3	4	0	0	2	1	1	0	0	0	0	0	1	0	0	0	0	0	1	3	1	0	4	0	0	0	2	0	0	0	4	0	1	0	0	0	0	1	1	1	0	0	0	0
OTU_243	0	0	1	0	1	0	1	1	0	3	0	3	0	0	0	0	0	1	0	0	0	0	0	1	0	2	0	0	1	2	0	1	0	0	0	0	1	2	0	0	0	0	0	1	1	2	3	0	0
OTU_1855	0	1	0	0	0	0	0	0	0	0	0	0	0	0	0	0	0	0	0	0	0	0	1	0	0	0	0	0	0	0	0	1	0	0	0	0	0	0	3	0	0	0	0	0	0	0	0	0	0
OTU_125	5	3	1	1	1	4	16	4	0	8	2	4	5	2	3	3	7	4	0	1	2	1	1	4	2	1	3	5	3	0	2	3	1	4	8	1	5	4	3	1	3	14	2	2	0	1	1	1	3
OTU_153	4	2	3	2	3	4	5	0	2	1	1	1	8	2	7	2	0	1	0	3	2	6	3	1	4	2	3	1	3	1	2	0	4	0	2	6	4	6	1	2	1	5	3	6	5	1	1	5	8
OTU_165	3	1	0	4	3	1	3	0	4	3	3	4	0	4	2	0	2	1	0	2	0	4	0	3	2	2	3	3	0	0	0	2	0	0	2	2	3	6	1	1	0	0	2	2	1	3	2	2	3
OTU_469	0	0	0	0	0	2	0	1	0	0	5	0	0	0	0	0	0	0	1	0	0	1	0	1	2	0	1	1	0	2	1	0	1	0	0	1	0	1	0	1	1	0	0	0	0	0	0	1	2
OTU_185	2	1	2	3	0	2	2	2	1	3	0	3	1	1	2	1	0	3	2	2	1	1	4	3	3	2	1	4	2	1	0	0	0	2	0	0	1	5	0	0	5	1	2	2	3	2	2	1	2
OTU_682	0	0	0	0	1	0	0	0	1	0	0	0	1	0	1	1	1	0	0	0	1	0	1	0	0	0	1	1	0	0	1	0	0	0	0	0	0	0	0	0	0	1	0	0	0	0	0	0	0
OTU_241	1	2	1	2	1	0	0	0	4	0	0	0	1	1	3	2	0	1	2	2	1	1	0	0	0	0	1	2	0	0	0	0	0	0	2	1	2	3	3	0	0	0	0	0	1	1	2	1	0
OTU_616	0	0	0	0	0	0	0	0	1	0	0	0	0	1	0	0	0	0	0	1	0	0	0	0	0	1	1	0	0	0	0	0	0	0	1	1	1	0	0	0	0	1	0	1	0	0	0	0	0
OTU_2039	0	0	1	1	0	1	0	0	1	8	2	1	0	0	2	0	1	0	0	1	0	1	0	3	0	0	0	2	1	0	1	0	0	0	0	0	0	2	0	1	0	1	0	2	1	0	1	0	0
OTU_101	0	0	1	8	2	0	0	4	2	0	0	8	0	1	1	1	1	1	2	2	1	1	0	1	1	1	3	2	0	1	2	1	1	0	2	0	5	2	2	2	0	0	2	1	4	2	0	4	2
OTU_702	1	1	0	0	0	0	0	0	0	0	0	0	0	1	0	0	0	0	0	0	0	0	0	3	0	1	1	0	2	0	1	1	0	0	0	0	0	2	0	1	0	0	0	2	0	0	0	0	2
OTU_119	3	0	3	4	4	2	2	2	3	2	2	2	2	6	5	4	4	3	2	0	2	0	4	5	2	3	1	7	0	0	7	2	1	1	1	10	1	3	2	3	1	2	7	5	2	7	1	0	0
OTU_304	4	4	1	5	3	3	1	6	3	5	3	4	3	2	4	7	6	2	1	1	0	5	2	6	2	2	2	1	5	3	10	1	4	0	6	2	3	1	3	2	2	1	5	8	8	6	6	3	5
OTU_776	0	0	1	1	0	0	0	0	0	0	1	1	2	2	2	1	1	0	1	4	2	1	2	0	2	0	3	0	1	1	1	0	0	0	0	2	0	1	1	1	0	0	1	1	0	0	0	0	1
OTU_131	0	3	1	3	0	3	4	0	2	2	2	2	3	1	5	2	3	1	0	0	1	0	1	1	4	3	1	2	1	1	2	1	2	3	2	2	3	3	0	4	1	2	2	0	6	1	5	0	3
OTU_1578	0	0	0	0	0	0	0	0	1	0	0	0	0	0	0	0	0	0	0	0	0	0	0	0	0	0	0	1	0	0	2	0	0	0	0	0	0	0	0	0	0	0	0	0	0	1	0	0	0
OTU_842	1	1	3	0	1	0	0	3	0	0	0	0	3	2	0	3	3	2	3	5	7	4	1	0	0	0	3	1	2	3	5	0	2	0	0	2	2	1	6	4	1	1	5	0	1	1	1	4	5
OTU_205	2	0	0	0	2	0	0	0	0	2	0	2	0	0	0	0	2	0	1	2	0	0	1	0	0	1	1	0	0	0	1	0	0	1	1	1	1	1	1	1	0	1	1	4	2	1	0	1	0
OTU_392	0	0	2	0	0	2	0	0	0	1	1	0	3	0	0	4	1	0	0	1	3	0	0	0	1	0	0	1	2	0	5	0	2	0	1	1	0	0	2	0	3	0	9	1	1	2	1	1	1
OTU_168	5	2	1	1	0	2	4	0	0	3	2	3	3	2	0	1	3	4	2	0	3	0	1	5	1	1	1	3	2	0	1	0	1	4	0	5	3	1	4	2	0	3	0	4	2	0	3	0	0
OTU_68	10	9	8	3	13	3	5	8	2	9	7	7	2	6	8	6	6	15	8	4	5	4	14	13	4	4	4	3	5	15	6	13	6	13	6	5	2	6	2	10	4	17	4	5	1	8	2	5	8
OTU_137	2	0	6	1	2	0	0	2	1	0	0	2	2	0	0	3	0	1	0	5	7	8	1	0	0	1	4	0	2	4	1	2	1	3	6	5	1	1	3	3	1	2	0	0	3	1	0	4	4
OTU_113	4	3	4	0	4	1	2	4	3	2	4	3	3	2	5	0	7	2	2	4	0	2	0	0	2	2	9	0	2	0	2	0	5	0	9	0	2	2	2	1	0	2	6	0	4	2	0	0	4
OTU_246	4	3	2	4	1	7	6	1	3	11	3	3	3	1	2	1	7	5	2	2	0	2	5	5	3	5	2	7	3	2	4	5	1	6	3	9	1	12	9	2	2	1	1	15	8	2	17	8	2
OTU_245	1	1	0	1	5	2	1	0	1	13	0	1	1	2	1	0	2	3	0	1	2	4	0	0	1	2	0	2	2	0	0	1	3	1	1	0	3	1	1	3	0	1	0	1	3	0	0	0	1
OTU_415	1	2	0	1	4	1	1	0	1	1	2	1	0	1	0	1	0	3	1	0	0	0	1	1	2	0	5	0	3	1	2	3	0	2	1	2	1	4	1	1	0	0	0	0	4	0	0	0	0
OTU_2178	0	0	0	0	0	0	1	0	0	0	0	0	0	0	0	0	0	0	0	0	0	0	0	0	0	0	0	0	0	0	0	0	0	0	0	0	0	0	0	0	0	0	0	0	0	0	0	0	0
OTU_1594	0	0	0	0	0	0	0	0	0	0	0	0	0	0	0	0	0	0	0	0	0	0	0	0	0	0	0	0	0	0	0	0	0	1	0	0	0	0	0	0	0	0	0	0	0	0	0	0	0
OTU_123	1	1	5	7	2	3	0	2	3	1	3	1	5	3	2	1	4	0	2	5	2	4	0	0	2	1	3	3	2	2	0	1	1	0	3	3	1	2	3	1	1	0	1	0	2	7	0	1	1
OTU_1231	0	1	0	0	0	0	0	0	0	0	0	0	0	0	1	0	0	0	0	0	0	0	0	0	0	0	1	0	0	0	0	0	0	0	1	1	0	0	0	0	0	0	0	0	0	0	0	0	0
OTU_560	0	0	2	0	0	0	0	2	0	0	0	0	0	0	1	0	1	0	1	0	1	1	0	0	0	0	0	0	0	0	0	0	0	0	0	1	0	0	0	1	0	0	0	0	0	0	0	1	1
OTU_752	0	1	1	0	0	0	0	2	0	0	0	0	0	1	0	1	1	1	0	0	0	1	0	0	0	1	0	1	0	0	0	0	0	0	0	0	1	0	0	1	1	0	0	0	1	0	0	0	1
OTU_72	2	5	6	5	7	2	1	3	3	10	3	3	3	7	3	3	8	6	5	4	6	0	1	2	3	1	3	5	5	0	7	0	0	4	1	3	5	0	7	5	1	2	2	1	4	6	2	10	6
OTU_2102	1	0	0	3	0	0	2	0	1	1	1	4	3	2	0	1	2	3	2	0	2	1	4	4	0	3	1	0	0	2	10	0	2	1	0	0	0	0	0	1	3	4	4	0	0	1	2	0	0
OTU_833	0	0	0	0	0	1	0	0	0	1	0	1	0	0	0	0	0	1	1	0	0	0	0	0	1	1	0	0	0	0	0	1	0	0	0	0	0	1	0	0	0	0	0	0	1	0	0	0	0
OTU_959	0	0	0	0	0	0	0	0	0	0	0	0	0	4	0	0	0	0	0	0	0	0	0	0	0	0	0	0	0	0	0	0	0	0	0	0	0	0	0	0	0	0	0	0	0	0	0	0	0
OTU_133	2	2	4	0	4	1	3	4	2	0	0	3	0	3	4	0	2	0	2	0	4	1	5	2	1	1	1	2	3	1	2	3	4	1	1	4	1	1	2	2	1	3	4	1	0	3	6	2	0
OTU_14	11	7	1	7	7	17	12	2	10	5	7	8	2	9	2	4	5	13	3	3	3	4	4	1	8	4	2	17	0	2	3	5	1	9	4	5	4	4	3	7	3	10	1	8	22	4	13	4	4
OTU_2140	0	0	0	0	0	0	0	0	0	0	0	0	0	0	0	0	0	0	0	0	0	0	0	0	1	0	1	0	0	0	0	0	0	0	0	0	0	1	0	0	0	0	0	1	0	0	0	0	0
OTU_743	1	0	1	3	0	2	0	0	0	1	1	0	0	0	0	0	0	0	0	2	0	0	0	1	3	0	0	0	0	0	0	0	1	2	0	0	0	1	0	0	0	0	0	0	0	0	1	2	0
OTU_1573	2	0	1	0	1	1	1	0	0	0	0	0	0	0	0	0	0	1	0	0	0	0	0	0	0	0	0	0	0	0	0	0	0	0	0	0	0	0	0	0	0	0	0	1	0	0	0	0	0
OTU_1580	0	0	0	0	0	0	0	0	0	0	0	0	0	0	0	0	0	0	0	0	0	0	0	0	0	0	0	1	0	0	0	0	0	0	0	0	2	0	0	0	0	0	0	0	1	0	0	0	0
OTU_142	0	2	1	3	4	0	0	1	3	0	0	1	2	6	0	2	4	0	3	2	2	1	0	0	2	0	4	0	1	1	4	0	1	0	0	1	1	1	1	1	2	0	1	0	1	0	0	5	1
OTU_192	1	0	2	2	5	4	2	1	2	2	3	0	1	1	0	2	3	3	3	1	2	3	4	5	1	5	0	0	3	4	3	0	2	3	3	1	2	2	1	2	0	0	1	1	4	1	4	1	4
OTU_128	11	4	2	4	6	5	1	7	12	0	4	4	3	4	3	3	12	0	9	8	7	3	0	0	2	1	7	4	6	1	9	1	4	0	1	3	4	0	7	4	3	1	6	0	3	0	3	8	1
OTU_96	12	1	4	5	2	7	8	4	1	4	6	9	6	5	3	4	5	4	11	4	2	1	0	5	6	4	2	3	4	1	7	3	4	3	6	8	7	7	4	6	1	2	1	2	7	1	2	1	5
OTU_2188	0	0	0	0	0	0	0	0	0	0	0	0	0	0	0	0	0	0	0	0	1	0	0	1	0	0	0	0	0	0	0	0	0	0	0	0	0	0	0	1	0	0	0	0	0	0	0	0	0
OTU_1564	0	0	0	0	0	0	0	0	0	0	0	0	0	0	0	0	0	0	0	0	0	0	0	0	1	0	0	0	1	0	0	0	0	0	0	0	0	0	0	1	0	0	0	0	1	0	0	0	0
OTU_1199	0	0	0	0	0	0	0	0	2	0	0	1	0	0	0	0	0	0	0	0	0	0	1	0	0	0	0	0	0	0	0	0	0	1	0	0	0	0	0	0	1	0	0	0	0	0	0	0	0
OTU_468	1	0	0	1	0	0	0	0	4	1	1	0	0	3	0	0	0	0	2	0	0	0	0	0	0	1	0	1	0	0	0	0	0	0	0	0	4	0	1	1	0	0	0	0	1	0	0	0	1
OTU_1647	0	0	1	0	0	0	0	1	0	0	0	0	0	0	0	0	0	0	0	2	0	0	0	1	0	0	1	0	0	0	0	0	0	0	0	0	0	0	1	0	0	0	0	0	0	0	0	0	0
OTU_426	2	1	4	2	1	0	1	2	1	0	3	2	2	2	4	3	1	1	2	1	2	0	0	1	0	2	1	2	0	0	2	2	2	1	0	0	0	1	1	3	3	2	1	3	0	2	0	1	3
OTU_95	5	6	1	1	2	4	3	1	5	4	1	1	0	1	1	0	1	0	1	1	1	4	3	2	1	0	2	2	5	1	2	0	0	1	2	2	3	0	2	1	2	0	0	3	2	1	1	1	0
OTU_660	0	0	0	0	0	0	0	0	0	0	0	0	0	0	0	0	0	0	0	1	0	0	2	0	0	0	2	0	0	0	0	0	2	0	0	0	0	0	0	0	0	0	0	0	0	0	0	1	0
OTU_276	2	0	0	0	0	1	0	2	0	1	0	2	0	2	0	2	0	0	0	0	1	0	0	0	1	0	3	0	0	3	0	6	0	4	0	4	1	0	2	0	0	2	0	0	1	0	1	1	2
OTU_271	2	1	3	0	0	0	0	0	0	1	1	2	0	1	0	1	0	2	0	2	1	4	4	1	1	3	6	0	1	1	3	0	1	0	1	0	2	1	4	0	1	2	5	0	1	3	0	3	2
OTU_86	0	0	0	0	0	9	1	0	0	2	1	1	0	0	0	0	0	2	0	0	0	0	5	9	2	3	0	1	2	3	0	2	0	5	0	5	0	3	0	2	0	1	0	3	0	0	3	0	0
OTU_193	4	2	2	0	2	0	1	3	3	1	0	6	0	3	2	5	6	0	1	2	5	1	0	3	1	4	4	1	2	3	0	0	0	1	5	2	2	0	10	2	4	1	0	0	2	4	7	2	1
OTU_219	1	1	0	0	1	3	2	4	3	1	0	1	0	2	1	2	1	1	1	4	0	0	2	2	0	1	4	1	1	0	2	7	2	4	1	1	2	0	2	3	0	2	0	1	0	0	1	2	4
OTU_188	0	0	0	0	0	0	0	0	0	0	1	0	0	0	0	25	0	0	0	0	0	0	0	0	0	0	0	0	0	0	0	0	0	0	0	0	0	0	0	0	0	0	0	0	0	0	0	0	0
OTU_333	1	0	1	1	1	0	0	0	0	0	1	0	1	3	0	1	5	2	0	0	0	0	0	0	1	1	1	0	1	0	0	1	0	0	0	0	0	0	0	3	0	0	0	0	1	1	0	0	0
OTU_60	9	2	5	3	4	8	12	4	5	9	2	6	1	7	5	2	3	2	2	6	1	6	7	5	9	2	0	3	1	2	1	6	7	2	2	1	2	2	7	2	0	1	5	2	1	3	2	3	7
OTU_2315	0	0	0	3	1	1	3	0	0	0	0	0	0	0	0	0	1	0	0	0	0	0	0	3	0	0	1	0	0	0	1	0	0	0	0	0	1	0	0	0	0	0	0	0	2	1	0	0	0
OTU_838	1	0	2	1	1	1	0	1	0	0	0	1	2	2	2	0	1	0	0	3	0	0	1	2	1	2	0	2	1	1	0	0	2	2	0	2	0	0	0	1	1	0	3	0	1	2	0	1	0
OTU_2105	0	0	0	0	1	0	0	0	0	0	0	0	1	0	0	1	0	1	0	1	0	0	0	0	0	0	0	0	0	0	0	0	0	0	0	0	0	0	0	0	0	0	0	0	0	0	0	0	0
OTU_1008	3	1	0	0	0	1	0	0	2	1	0	0	0	0	0	0	0	0	1	1	0	1	0	0	1	1	1	1	0	0	2	0	0	0	1	0	0	1	3	0	1	0	1	0	0	0	0	0	0
OTU_2477	0	0	0	0	0	0	0	0	0	0	0	0	0	0	0	0	0	0	0	0	0	0	0	0	0	0	0	0	0	1	0	0	0	0	0	0	0	0	0	0	0	0	0	0	0	0	0	0	0
OTU_520	0	1	0	0	1	0	0	1	1	0	1	0	1	0	0	0	2	0	1	1	0	0	1	0	0	2	2	1	2	0	1	0	1	1	1	3	0	1	1	1	0	0	4	1	0	2	0	0	2
OTU_12	8	7	1	5	4	6	6	8	3	3	4	5	8	4	5	3	6	2	4	7	6	7	5	2	6	0	4	4	14	3	9	9	8	5	4	5	2	4	10	8	6	5	12	2	7	3	4	14	3
OTU_20	0	2	2	7	9	5	7	0	0	7	4	5	6	4	2	2	4	2	5	2	3	3	3	2	5	2	15	10	1	0	1	0	2	2	8	5	16	4	3	2	2	1	1	6	14	8	2	14	0
OTU_321	1	2	1	2	0	0	4	0	0	2	2	0	0	1	0	0	2	0	0	1	0	0	1	0	1	0	3	1	0	0	1	0	0	2	3	1	1	3	1	1	0	0	0	0	5	1	0	2	1
OTU_1407	0	0	0	0	0	0	0	1	0	0	0	0	2	0	0	1	3	0	0	0	0	0	0	0	0	0	0	0	2	0	0	0	0	0	0	0	0	0	0	0	1	0	0	0	0	0	0	0	1
OTU_2513	1	0	0	0	0	0	0	0	0	0	0	0	0	0	0	0	0	0	0	0	1	0	0	1	0	0	0	0	0	0	0	0	0	0	0	0	0	0	0	0	0	0	0	0	0	0	0	0	1
OTU_644	0	0	0	0	0	0	0	0	1	0	1	1	0	0	0	1	1	1	0	1	0	1	0	0	0	0	0	0	1	0	2	1	0	0	0	0	0	0	1	0	0	0	0	0	1	0	0	2	0
OTU_1363	0	0	0	0	0	2	0	0	0	0	1	0	0	0	0	1	0	0	0	0	0	0	0	0	0	0	0	0	0	0	0	0	0	0	0	0	0	0	0	0	0	0	0	0	0	0	0	0	0
OTU_2240	0	0	0	0	0	0	0	1	0	0	0	0	0	0	0	0	0	0	0	0	0	0	0	0	0	0	0	0	0	0	0	0	0	0	0	0	0	0	0	0	0	0	0	0	0	0	0	0	0
OTU_268	1	4	1	3	2	3	2	1	2	0	0	2	1	2	3	4	0	3	0	1	0	0	2	3	0	1	0	2	1	1	2	2	0	0	1	4	1	2	1	0	3	2	2	2	1	0	0	1	3
OTU_1514	0	0	1	0	0	0	0	1	0	0	0	0	0	0	0	0	0	0	0	0	0	0	0	0	0	0	0	0	0	0	0	0	1	0	0	0	0	0	0	0	0	0	0	0	0	0	0	0	0
OTU_543	0	0	1	0	2	0	0	3	1	0	2	3	1	1	0	0	2	0	1	0	0	0	0	0	1	0	2	1	3	5	1	1	2	1	2	2	0	2	1	1	0	1	2	2	0	1	0	0	1
OTU_855	0	0	0	0	0	0	0	1	0	1	0	2	0	0	2	0	0	0	0	0	0	2	0	1	0	2	0	0	1	0	0	0	0	0	0	2	0	1	2	0	1	0	0	0	0	0	1	0	0
OTU_91	2	1	1	2	1	2	1	1	2	2	4	0	2	0	1	0	2	0	1	0	0	1	1	1	0	2	4	2	1	3	0	3	1	4	0	0	1	1	0	2	0	1	0	1	0	2	1	0	0
OTU_1790	0	0	0	1	0	0	1	0	0	1	0	0	0	0	0	0	1	0	0	0	0	0	1	0	0	0	0	0	0	0	0	0	0	2	0	0	0	0	0	0	0	0	2	1	0	2	0	0	0
OTU_1770	0	1	0	0	1	0	0	0	0	0	0	0	0	2	0	0	0	0	0	1	0	0	0	0	0	0	0	1	0	0	0	0	0	0	0	0	0	0	1	0	0	0	0	1	2	1	0	1	0
OTU_1362	0	0	0	0	0	0	0	0	0	0	0	0	0	0	0	0	0	0	0	0	0	0	0	1	0	0	0	0	0	0	0	0	0	0	0	0	0	0	0	0	0	0	0	0	0	0	0	0	0
OTU_181	1	3	1	6	0	1	0	0	8	0	1	1	5	1	3	1	3	0	1	0	2	1	0	0	1	0	1	1	0	0	2	0	0	0	6	0	1	8	1	0	0	0	0	0	2	0	0	0	1
OTU_302	8	1	2	3	2	1	1	3	0	1	0	1	1	2	0	1	0	2	4	1	2	0	2	5	0	1	0	1	4	2	1	3	1	2	3	2	0	0	2	1	1	0	1	0	0	0	1	0	0
OTU_1955	0	0	0	0	0	0	0	1	0	0	0	0	0	0	1	0	0	1	0	0	0	0	0	0	0	0	0	1	0	0	0	0	0	0	1	0	0	0	0	0	0	0	0	0	0	0	0	0	0
OTU_471	0	0	1	0	0	1	0	0	0	3	0	0	0	0	1	2	0	0	0	0	0	0	1	5	0	0	1	0	1	3	0	1	2	1	2	0	0	0	0	2	1	2	1	0	1	0	0	3	0
OTU_236	3	2	0	3	1	2	2	1	2	0	4	3	4	0	1	3	4	2	5	2	0	1	0	0	2	1	7	4	1	4	6	0	0	4	2	2	2	1	0	1	2	2	0	4	2	3	0	2	4
OTU_2570	1	2	4	1	2	1	2	2	1	4	0	1	0	1	0	1	5	0	0	0	0	0	2	0	2	1	0	0	1	1	1	6	4	6	1	2	0	4	1	1	1	1	0	1	3	2	0	1	3
OTU_698	2	0	0	0	0	0	0	0	0	0	0	0	0	0	0	0	0	0	1	0	0	0	0	0	1	0	0	0	0	0	0	1	1	0	0	0	0	0	0	0	0	0	0	0	1	0	0	1	1
OTU_412	0	1	0	0	0	0	0	0	1	0	0	0	1	1	1	0	0	0	0	1	0	1	0	1	0	1	0	0	2	0	0	0	1	2	2	0	0	0	0	0	0	3	0	0	0	2	2	1	0
OTU_938	1	0	1	0	0	0	0	1	0	1	1	0	0	0	0	2	6	1	1	1	2	2	1	0	1	0	0	2	0	0	2	1	1	1	3	0	2	1	4	2	1	1	0	0	2	0	0	4	1
OTU_233	0	3	0	1	1	0	2	1	1	0	1	1	0	0	0	1	0	0	1	1	1	2	0	1	0	2	0	0	1	1	1	0	0	0	1	0	0	0	0	1	1	0	0	0	1	0	0	0	0
OTU_437	1	0	3	5	5	0	0	2	0	3	2	2	2	0	1	0	1	1	1	2	4	0	3	1	2	2	0	3	2	2	2	1	2	2	0	3	0	6	1	1	0	0	2	4	0	0	5	1	1
OTU_726	2	0	0	0	0	0	0	1	0	1	0	0	5	0	0	0	3	1	0	2	0	0	2	1	2	0	2	0	1	0	0	0	0	0	2	2	0	1	0	0	2	0	0	2	1	2	0	2	0
OTU_956	0	0	0	0	1	3	0	0	0	0	1	0	0	0	0	0	1	0	1	0	1	0	1	1	0	1	0	1	0	2	0	0	0	2	0	0	1	2	0	0	1	4	0	5	0	1	0	1	0
OTU_1620	0	1	0	2	0	0	0	0	0	0	0	0	0	0	0	0	0	0	0	0	0	0	2	0	0	0	0	0	0	0	0	0	0	0	0	0	0	0	1	0	0	0	1	2	0	0	0	0	0
OTU_2250	0	0	0	0	0	0	0	0	0	0	0	0	0	0	0	0	0	0	0	0	0	0	0	0	0	0	0	0	0	0	0	0	0	0	0	0	0	0	0	0	0	0	0	0	0	0	0	0	0
OTU_2579	0	0	0	1	0	0	0	0	0	0	0	0	0	0	0	0	0	1	0	0	0	0	0	0	1	0	0	0	0	0	0	0	0	1	0	0	0	0	0	0	0	0	0	0	0	0	0	0	0
OTU_525	0	1	1	2	1	2	1	1	1	2	0	4	1	1	2	2	0	0	1	0	0	1	3	1	1	1	0	0	1	0	1	0	1	0	0	1	1	3	0	2	1	1	0	1	1	2	0	0	0
OTU_341	0	2	1	0	1	0	1	0	0	0	0	1	0	0	2	0	0	1	2	0	0	0	1	2	0	0	2	0	2	2	0	4	1	0	0	0	0	0	3	0	1	1	1	1	2	0	0	0	1
OTU_2386	0	0	0	0	1	0	0	0	0	0	0	0	0	0	0	0	0	0	0	0	0	0	0	0	0	0	0	0	0	0	0	0	0	0	0	0	0	0	0	0	0	0	0	0	0	0	0	0	0
OTU_980	0	0	0	0	0	0	1	0	0	0	0	0	0	0	0	0	0	0	0	0	0	1	0	0	0	1	0	0	0	0	0	0	0	2	0	1	0	0	0	0	0	0	0	0	0	0	0	0	0
OTU_596	3	0	0	0	0	1	1	1	0	1	2	0	0	1	2	0	3	0	0	0	0	1	0	1	0	0	1	0	0	2	0	0	0	0	4	1	0	0	0	1	0	1	1	0	0	0	2	0	1
OTU_443	1	1	1	0	0	0	0	1	0	0	2	0	2	0	0	2	0	0	0	4	2	0	0	0	0	0	2	0	0	1	0	0	0	0	0	0	0	0	0	1	0	0	0	0	1	0	0	1	1
OTU_189	0	2	4	6	2	4	6	2	3	3	1	4	3	6	5	3	2	0	9	9	1	4	5	1	4	1	11	8	2	1	3	0	6	1	7	2	4	2	2	0	3	4	6	1	0	3	0	5	5
OTU_783	2	0	0	0	0	0	3	0	0	0	0	0	0	0	1	0	0	0	0	0	0	0	0	1	0	0	0	0	0	0	0	0	0	0	0	0	0	0	0	0	2	0	0	0	0	1	0	0	0
OTU_239	3	5	0	1	1	0	1	7	1	1	3	1	4	1	1	3	1	2	1	2	3	3	2	1	2	2	0	1	3	2	4	3	4	1	1	2	0	1	0	2	1	3	2	2	0	0	2	1	1
OTU_883	0	0	1	0	0	0	0	0	1	0	0	0	0	2	1	0	1	0	0	0	0	0	0	0	1	0	0	0	0	0	0	0	0	1	0	0	0	1	0	1	0	3	0	0	1	0	0	0	0
OTU_2247	0	0	0	0	0	0	0	0	0	2	1	0	0	0	0	0	0	0	0	0	0	0	0	0	0	0	0	0	0	0	0	0	0	0	0	0	0	0	0	0	0	0	0	0	0	0	0	0	0
OTU_621	1	2	2	2	0	1	0	0	3	0	0	1	0	2	0	1	1	0	0	0	0	0	3	2	0	1	0	1	0	2	0	1	2	3	3	0	1	1	2	2	0	2	0	2	2	0	1	2	1
OTU_2234	0	0	0	0	0	0	0	0	0	0	0	0	0	0	0	0	0	0	0	0	0	0	0	0	0	0	0	0	0	0	0	0	0	0	0	0	0	0	0	0	0	0	0	0	0	0	0	0	0
OTU_186	2	2	1	2	2	1	0	3	0	1	1	0	1	0	6	1	0	0	1	2	6	0	1	0	3	1	6	2	2	1	1	0	2	1	2	1	0	3	2	1	3	0	2	2	0	4	0	2	1
OTU_143	1	0	0	0	1	1	0	1	1	2	1	0	3	0	2	0	0	3	0	2	2	1	1	0	3	0	1	2	0	0	3	1	4	0	1	0	0	1	0	0	1	0	2	1	0	0	1	0	1
OTU_287	1	3	2	2	0	1	0	7	1	0	2	1	2	2	2	9	7	1	8	6	8	2	0	0	5	1	5	3	1	0	1	0	0	0	1	3	3	1	3	2	3	0	1	1	0	6	0	9	6
OTU_477	1	1	4	1	1	0	0	2	0	0	0	0	2	2	0	3	0	1	0	0	1	2	1	0	0	0	5	1	0	0	1	2	0	0	1	0	0	0	0	0	0	0	1	0	0	1	0	0	3
OTU_120	11	8	5	5	5	4	4	6	5	4	4	2	3	3	12	8	4	3	11	9	6	7	4	8	3	3	8	3	7	3	8	5	19	4	6	1	3	5	5	8	6	2	5	2	7	8	3	7	7
OTU_1880	0	2	0	0	0	1	0	2	0	0	0	0	0	0	0	0	0	0	0	0	0	1	0	0	0	0	0	0	0	0	1	0	0	0	0	0	0	0	0	0	0	0	1	0	0	0	0	0	0
OTU_306	0	0	0	0	2	0	0	3	2	0	2	7	2	1	1	1	2	0	0	0	5	7	0	0	0	0	2	0	2	0	0	0	4	0	2	1	0	0	6	0	1	0	0	0	1	10	0	4	0
OTU_353	1	2	0	0	1	1	3	0	1	0	0	2	0	2	3	0	0	0	0	0	0	0	1	0	0	0	1	4	0	2	0	0	1	0	3	0	0	2	1	1	2	0	0	0	0	1	0	4	1
OTU_721	0	2	0	0	0	0	0	0	0	0	0	0	0	0	0	0	0	0	0	0	0	0	0	0	0	0	0	0	0	0	0	0	0	0	0	0	0	0	0	0	0	0	1	0	0	0	0	0	0
OTU_288	1	1	0	0	0	1	0	0	1	0	1	0	1	0	0	0	2	1	1	0	2	3	4	2	0	0	1	0	0	2	3	4	1	1	0	0	0	3	0	0	1	0	2	0	0	0	1	0	5
OTU_384	4	3	8	4	4	5	4	2	2	0	0	0	5	0	6	2	4	1	3	4	2	1	2	1	1	0	3	2	3	4	4	0	6	0	3	2	1	2	4	2	3	1	2	3	5	2	7	3	1
OTU_146	1	1	3	1	1	5	3	5	3	7	1	2	1	0	7	2	1	5	4	2	3	1	3	4	0	2	0	2	2	4	1	2	1	2	2	0	0	2	6	3	3	1	2	7	2	4	3	6	3
OTU_661	0	1	0	0	0	1	1	2	1	0	0	2	1	0	0	1	0	0	0	2	3	0	2	1	0	0	1	0	0	6	0	2	0	0	1	0	1	0	1	0	1	2	0	0	1	1	2	2	2
OTU_2135	0	0	0	0	0	0	0	0	0	0	0	0	0	0	0	0	0	0	0	0	0	0	0	0	0	0	0	0	0	0	2	0	0	0	0	0	0	0	0	0	0	0	0	0	0	0	0	0	0
OTU_618	2	0	0	0	0	1	0	0	0	2	0	0	0	4	5	1	0	0	0	1	0	2	0	0	0	0	0	0	0	1	0	1	0	1	2	1	0	2	0	0	1	5	0	0	1	0	2	0	2
OTU_1415	0	1	0	2	0	0	0	0	1	0	0	0	0	2	2	0	0	0	0	0	0	0	0	0	0	0	0	0	0	0	0	0	0	0	0	3	0	1	2	1	1	1	0	1	1	1	1	0	0
OTU_114	8	4	8	11	8	10	7	7	15	17	17	2	17	14	2	10	8	10	9	4	17	3	5	10	7	10	6	9	8	30	10	8	9	4	15	6	11	5	18	9	19	2	5	8	16	5	9	9	6
OTU_105	3	1	3	0	2	3	1	0	0	2	1	4	0	1	1	1	1	1	0	2	1	0	1	4	0	5	1	4	0	0	1	2	5	1	0	0	2	4	0	1	0	0	0	3	0	2	4	0	0
OTU_599	1	1	5	0	1	0	2	1	0	3	0	1	1	2	1	1	3	0	1	1	2	0	0	1	1	2	3	1	0	0	1	0	1	1	3	1	0	1	2	0	0	1	0	1	0	0	0	3	1
OTU_1763	0	1	0	0	0	0	0	0	0	0	0	0	0	0	0	0	0	0	0	0	0	1	0	0	0	0	0	0	0	0	0	0	0	0	0	0	0	0	1	0	0	1	0	0	0	0	0	0	0
OTU_557	0	0	0	1	0	2	1	0	0	6	0	0	0	1	0	0	0	1	0	0	0	0	1	0	1	1	0	1	0	0	0	0	0	0	0	0	0	0	0	0	0	0	0	4	0	0	1	0	0
OTU_673	1	0	2	2	2	0	2	2	0	0	0	0	1	0	0	2	0	3	1	1	1	1	1	0	4	1	1	4	1	1	3	2	2	4	1	1	0	1	0	0	1	5	2	2	3	1	1	0	0
OTU_389	2	0	0	0	1	1	2	0	1	0	0	1	0	0	0	0	0	1	0	0	1	1	1	2	1	1	0	1	2	0	1	1	0	0	1	3	0	1	1	0	1	0	1	3	0	2	0	1	0
OTU_793	1	0	1	0	0	0	0	0	1	0	0	3	0	0	0	1	0	1	0	0	0	0	0	1	2	0	0	0	0	1	0	1	0	0	0	0	0	0	0	1	0	0	1	0	4	0	1	0	0
OTU_383	0	2	0	0	0	0	0	0	0	2	0	0	1	0	2	2	2	1	2	3	0	0	0	0	0	1	0	0	0	0	1	1	1	0	0	0	1	0	0	0	2	1	0	2	0	0	0	1	2
OTU_2480	0	0	0	2	0	0	0	0	0	1	0	1	0	1	0	0	0	0	0	0	1	0	0	1	0	0	0	0	0	0	0	0	0	0	0	0	1	1	0	0	0	0	0	0	1	0	0	0	0
OTU_1317	1	0	0	1	2	6	0	0	2	3	1	1	0	0	2	0	0	0	0	0	1	0	1	0	2	2	1	2	0	1	1	0	0	1	0	5	2	0	0	2	0	1	1	1	1	0	1	0	0
OTU_770	2	0	2	1	0	0	1	1	0	0	0	3	0	0	1	0	0	0	1	0	0	0	0	0	1	0	0	0	1	0	0	0	0	0	0	0	1	0	0	0	0	1	0	1	0	0	0	0	0
OTU_642	0	0	0	0	0	0	1	0	0	2	3	0	0	0	0	0	0	0	0	0	0	0	0	1	0	1	0	0	0	0	1	0	0	1	0	0	0	0	0	0	0	2	0	1	0	0	3	0	0
OTU_603	0	1	1	0	0	0	1	0	0	0	0	0	6	1	0	2	1	0	0	0	1	0	1	1	0	0	0	3	0	1	1	2	4	0	1	1	0	0	0	0	0	0	2	0	0	4	0	1	1
OTU_982	0	0	1	0	0	0	0	0	1	0	0	0	0	0	0	1	0	0	0	0	1	0	0	1	0	0	0	0	0	0	0	0	0	0	0	0	0	0	0	1	1	0	0	0	1	0	0	1	0
OTU_1653	0	2	0	0	0	0	0	0	0	0	0	0	1	0	0	0	0	0	0	0	0	0	0	0	0	0	1	0	0	0	0	0	2	0	0	0	0	0	0	0	0	0	0	0	0	0	0	1	0
OTU_629	3	2	2	3	3	4	9	3	6	0	5	3	1	4	2	3	4	2	6	4	3	4	2	5	2	1	3	2	5	2	7	1	0	0	5	3	5	3	1	2	2	3	2	4	2	0	1	3	2
OTU_478	2	0	1	1	1	0	0	1	1	0	0	0	3	0	0	1	1	1	1	1	4	3	0	0	0	0	0	0	0	0	2	0	1	0	1	0	0	0	1	0	2	0	0	0	0	0	0	2	1
OTU_993	3	0	0	0	0	0	0	0	0	2	1	1	0	2	1	1	1	0	0	0	0	2	0	0	0	1	0	1	0	1	0	1	0	0	0	1	0	2	1	0	0	0	0	1	1	0	0	1	0
OTU_364	1	1	0	0	0	0	0	3	0	0	0	3	3	1	0	0	0	0	2	0	0	1	0	0	1	0	1	0	2	0	1	0	0	0	2	0	1	0	1	1	0	0	0	0	0	0	0	0	1
OTU_148	1	0	1	1	3	2	3	0	3	1	0	2	0	3	0	1	2	0	0	1	2	1	0	2	1	5	0	1	0	0	2	1	1	1	1	2	0	1	0	1	1	0	0	3	1	0	1	1	0
OTU_678	1	0	0	0	0	0	2	0	0	0	0	0	0	0	0	0	0	2	0	0	0	0	0	0	0	0	0	0	0	0	0	0	0	1	0	0	0	1	0	0	0	0	0	0	0	0	1	0	0
OTU_363	0	0	0	2	0	0	1	0	2	1	0	0	0	0	0	2	0	0	0	0	0	0	0	1	0	0	0	1	0	0	1	0	0	0	0	0	1	0	1	0	0	0	1	0	0	1	0	0	0
OTU_109	3	2	1	2	0	5	5	0	2	1	1	4	3	4	3	6	1	7	2	8	2	1	4	1	0	2	4	6	2	2	1	1	1	4	6	2	0	6	2	0	1	4	3	8	2	0	1	3	1
OTU_447	2	0	5	5	1	3	1	1	2	0	2	3	1	2	1	3	0	2	7	2	1	0	5	1	1	4	2	0	1	0	0	5	1	0	0	3	3	1	1	4	3	1	0	3	0	1	1	2	1
OTU_473	1	1	1	0	1	1	1	1	0	0	1	1	0	2	0	1	1	0	1	2	0	0	3	3	0	1	2	0	1	4	0	4	0	1	1	0	0	0	4	0	0	3	0	9	0	2	0	2	4
OTU_538	0	0	0	0	0	1	0	0	0	0	0	0	0	0	0	0	0	2	0	0	0	0	0	0	0	1	0	3	0	0	0	3	0	2	0	0	0	0	0	2	0	1	0	1	0	0	1	0	0
OTU_309	0	0	0	0	0	0	0	2	0	0	0	0	1	0	0	2	1	0	0	1	0	0	0	0	0	0	2	0	3	0	0	0	0	0	0	2	0	0	2	0	2	0	1	0	0	0	0	2	1
OTU_1821	0	1	0	0	1	0	0	0	2	1	0	0	0	1	2	0	1	3	0	1	0	0	1	1	0	0	0	3	0	0	1	2	0	2	1	0	0	0	0	0	0	0	1	4	1	1	0	1	1
OTU_1086	0	0	0	0	0	0	0	0	0	0	0	0	0	0	0	0	0	0	0	0	0	0	0	0	0	0	0	0	0	0	0	0	0	0	0	0	0	0	0	0	0	0	0	0	3	0	0	0	0
OTU_1316	0	0	0	0	1	1	1	1	0	0	0	1	0	0	0	0	0	1	0	0	2	0	2	0	1	0	0	1	0	0	0	0	1	0	0	1	0	0	1	1	0	0	0	2	0	0	1	0	0
OTU_145	1	0	0	0	0	1	0	2	3	0	1	0	3	0	1	6	2	2	1	1	3	2	1	0	0	0	2	5	0	2	2	2	5	0	3	0	2	0	3	7	2	0	0	0	0	1	2	4	3
OTU_772	0	0	2	0	0	0	0	0	0	0	0	0	0	0	0	1	0	0	0	1	0	1	0	0	0	0	0	0	0	2	0	0	0	0	0	0	0	0	0	0	0	0	0	0	0	0	0	0	2
OTU_983	0	1	0	0	0	0	1	1	0	0	0	0	0	0	0	0	0	0	0	0	1	0	1	0	2	0	0	0	0	0	0	1	0	0	1	0	0	0	0	0	0	0	0	0	0	0	0	0	0
OTU_350	0	2	2	3	1	2	5	1	0	1	0	2	0	1	0	1	1	1	1	1	1	2	2	0	0	1	1	0	0	1	3	2	1	0	0	0	0	2	4	0	0	0	0	0	0	0	1	1	1
OTU_169	0	0	1	1	1	1	0	0	0	1	0	0	3	1	2	0	0	2	2	1	2	2	5	1	0	1	1	3	2	1	0	3	4	1	1	4	1	0	1	1	3	0	2	1	3	0	0	1	0
OTU_1422	0	0	0	0	0	0	1	1	0	1	0	1	1	0	0	0	0	1	0	0	0	3	0	0	0	0	0	0	0	1	0	0	0	0	0	2	0	1	2	0	3	0	1	0	1	0	0	0	1
OTU_284	0	0	1	0	3	0	0	3	1	0	0	0	2	0	1	1	0	0	0	2	1	1	0	0	0	0	2	0	0	1	2	0	2	0	2	1	0	0	1	0	0	0	1	0	0	0	0	1	3
OTU_339	0	1	1	0	0	0	0	1	2	0	1	0	3	1	0	4	2	2	3	1	0	3	0	0	0	1	2	0	0	0	0	2	2	5	1	0	1	0	2	1	2	4	3	0	1	0	2	1	1
OTU_955	0	0	0	0	0	0	0	0	0	0	1	0	0	0	0	0	0	2	0	0	0	0	0	0	0	0	0	0	0	0	0	0	0	0	0	0	0	0	0	1	0	0	0	0	0	0	0	0	0
OTU_2214	0	0	1	0	1	0	0	0	0	0	0	0	0	0	1	0	0	1	0	0	0	0	1	2	0	0	0	1	1	0	3	0	3	2	0	2	0	0	0	0	0	0	0	0	0	1	0	1	0
OTU_1686	0	0	0	0	0	0	0	0	0	0	0	0	0	0	0	0	0	0	0	0	0	0	0	0	0	1	0	0	0	0	0	0	0	0	0	0	0	0	0	0	0	0	0	0	0	0	1	0	0
OTU_453	2	3	1	3	2	2	2	3	0	1	1	0	0	4	1	3	0	4	1	2	2	0	1	2	1	2	1	1	2	0	2	2	1	5	2	2	0	1	1	1	1	0	2	1	1	0	3	1	1
OTU_1768	0	0	0	0	0	0	0	0	0	0	0	0	0	0	0	0	0	0	0	0	0	0	0	0	1	0	0	1	0	0	0	0	0	0	0	0	0	0	0	0	0	0	0	0	1	0	0	0	0
OTU_745	2	1	0	0	0	1	1	1	1	0	1	0	0	0	0	0	1	0	0	1	0	0	0	0	2	1	0	0	1	0	0	1	1	0	0	0	2	1	2	0	1	1	0	1	0	0	2	3	0
OTU_1771	0	0	0	0	0	0	0	0	0	0	0	0	0	0	0	0	0	0	0	0	0	2	0	0	0	0	0	0	0	0	0	0	0	0	0	0	0	0	0	0	0	0	0	0	0	0	0	0	0
OTU_161	0	3	2	5	7	0	0	1	2	6	2	3	1	3	0	1	5	5	2	6	2	5	1	0	3	3	0	0	3	1	2	0	4	0	1	3	2	2	7	1	0	0	0	1	2	3	0	1	2
OTU_1171	1	0	0	0	1	1	0	0	0	0	2	0	1	1	0	2	1	2	0	0	0	3	1	2	0	0	1	2	1	0	3	1	2	0	4	1	1	0	0	1	5	0	1	1	1	0	0	0	3
OTU_157	3	1	0	5	2	0	2	1	0	1	5	1	2	4	0	2	0	6	1	3	5	0	1	3	9	5	1	6	2	0	1	3	3	5	1	2	3	3	1	2	2	1	2	8	3	0	5	3	0
OTU_201	0	0	2	3	2	1	4	0	4	0	2	3	1	1	3	0	2	1	1	1	4	0	0	1	3	4	1	7	0	0	0	0	0	0	1	2	5	4	0	2	2	0	3	1	3	4	0	0	0
OTU_522	0	1	0	0	0	1	0	0	0	1	0	0	0	0	0	0	0	0	0	0	0	0	0	3	0	1	0	0	0	1	0	0	1	2	0	1	0	0	0	0	0	1	0	0	0	0	0	0	0
OTU_949	1	0	0	0	0	0	0	0	0	0	0	0	0	0	0	0	0	0	0	0	0	0	0	0	0	0	0	0	0	0	0	0	0	0	0	0	0	0	0	1	0	0	0	0	0	0	0	0	0
OTU_39	3	4	0	1	2	3	4	2	3	1	3	1	3	4	1	3	1	2	6	1	2	4	0	1	2	2	2	4	1	3	3	1	2	1	3	1	4	3	4	2	3	0	0	2	4	1	1	3	2
OTU_1398	0	0	0	0	0	0	0	0	0	0	0	0	0	0	0	2	0	0	0	0	0	1	0	0	0	0	0	0	0	0	0	0	0	0	0	0	1	0	0	0	0	0	0	0	0	0	0	0	0
OTU_1505	0	0	0	0	0	0	0	0	0	0	0	0	0	0	0	0	0	0	0	0	0	0	0	0	0	2	0	0	0	0	0	0	0	0	0	0	0	0	0	0	0	0	0	0	0	0	0	0	0
OTU_252	0	0	1	0	0	1	1	1	4	0	0	0	0	0	2	0	1	0	1	1	0	3	0	0	1	2	1	0	0	4	3	1	7	0	1	0	2	1	0	0	0	2	1	0	4	0	0	0	0
OTU_158	2	0	0	0	3	2	5	13	3	1	0	0	2	2	1	0	0	1	0	0	0	1	4	2	2	2	0	2	1	1	0	3	0	3	1	2	0	2	1	1	0	1	1	3	0	0	3	1	0
OTU_561	1	0	1	0	0	1	0	0	0	0	2	1	0	0	1	0	0	1	0	0	0	0	0	0	0	2	0	0	0	1	1	0	0	0	0	0	0	0	0	0	0	0	0	0	1	0	0	0	1
OTU_261	0	1	0	2	0	0	0	0	1	0	0	0	0	1	0	0	0	0	0	3	1	0	0	0	2	3	0	3	0	0	0	0	0	1	0	0	0	1	0	2	0	2	0	1	0	0	0	1	0
OTU_511	0	0	1	1	0	0	0	0	0	1	0	1	0	0	0	1	0	0	1	0	0	0	0	3	0	0	1	0	0	0	0	2	0	0	0	1	0	0	0	1	0	1	0	0	2	0	1	0	0
OTU_329	0	0	2	2	0	1	2	1	2	0	1	0	0	1	0	2	1	0	2	2	2	0	1	0	5	1	1	3	1	0	2	0	0	0	1	0	0	0	1	0	0	1	0	0	5	7	0	1	1
OTU_69	3	7	3	4	3	2	1	8	7	1	12	4	6	6	5	6	9	5	1	8	7	13	4	3	4	4	3	13	5	14	0	12	9	1	13	9	10	1	5	7	6	4	9	5	9	6	1	7	4
OTU_672	2	4	0	0	1	4	3	4	1	0	1	2	2	1	0	1	2	0	1	0	3	0	4	8	2	1	2	1	2	2	1	1	5	9	1	2	5	0	4	2	1	8	3	1	2	0	1	0	1
OTU_684	1	0	0	0	1	1	0	0	0	0	0	0	0	0	0	1	0	0	0	0	0	0	1	0	0	1	0	0	0	0	0	0	0	1	0	0	1	0	1	0	0	3	0	1	0	4	0	0	0
OTU_368	0	1	0	6	0	0	1	1	0	0	0	1	8	0	1	0	3	1	0	5	3	1	9	0	5	1	6	0	0	7	5	5	2	3	6	1	2	7	1	0	2	3	3	0	1	0	2	2	1
OTU_498	0	0	1	1	0	1	0	0	0	0	0	0	1	0	1	0	0	0	0	0	1	0	1	0	0	1	0	1	0	2	0	0	1	0	0	0	0	0	0	1	0	0	0	0	0	0	1	0	0
OTU_944	0	1	0	0	0	0	0	0	1	0	0	1	0	1	0	0	0	1	0	1	0	0	1	0	0	0	0	0	0	0	0	2	1	0	0	0	1	0	1	0	0	0	3	0	1	0	0	1	1
OTU_1097	2	4	3	2	1	3	4	3	1	3	4	2	2	3	1	2	1	3	0	2	1	3	2	3	0	4	3	0	1	3	2	0	2	2	2	2	3	2	1	1	4	1	0	3	2	0	1	0	0
OTU_581	1	0	0	2	0	0	0	0	0	1	1	0	0	0	0	0	0	1	2	0	0	0	0	0	1	0	0	1	0	0	0	0	0	0	1	0	0	1	0	2	0	0	0	0	0	0	0	0	0
OTU_865	0	0	1	0	0	1	0	1	0	0	0	0	4	0	1	0	0	0	0	2	0	1	0	0	0	0	0	1	0	0	0	0	1	0	0	0	0	0	0	1	0	0	0	0	0	1	0	0	0
OTU_1014	0	0	2	0	0	0	0	0	0	1	0	1	0	0	0	0	2	0	1	1	0	1	0	1	0	0	1	0	2	0	0	0	0	0	1	1	0	1	0	1	0	0	0	0	0	0	1	0	3
OTU_1172	1	0	0	0	0	0	0	0	0	0	0	1	0	0	0	0	0	0	0	0	0	0	0	0	0	0	0	0	0	0	0	0	0	0	0	1	0	0	0	1	0	0	0	1	0	0	0	0	0
OTU_623	0	2	1	1	0	2	0	0	0	1	0	1	0	1	0	1	0	1	1	0	0	0	0	3	0	0	0	1	0	1	1	1	0	1	2	1	3	0	0	1	0	1	0	1	1	0	1	0	1
OTU_521	0	0	0	0	0	1	0	0	0	1	3	1	0	1	0	0	0	1	0	2	0	0	1	1	0	0	0	2	0	1	1	1	0	0	0	0	2	0	1	0	0	0	0	0	0	0	0	0	0
OTU_275	5	0	2	2	1	0	3	5	1	3	1	6	1	1	4	0	6	3	1	1	1	2	3	1	5	3	1	1	4	5	2	2	2	0	1	1	5	4	2	4	0	0	2	6	0	2	7	5	4
OTU_859	0	0	0	0	0	0	0	0	1	0	0	0	0	0	0	0	0	0	0	0	2	0	0	0	1	0	0	0	0	0	0	0	1	0	0	0	0	2	0	0	0	0	0	0	0	1	0	0	0
OTU_700	1	0	1	0	0	1	0	0	0	1	0	0	0	1	0	0	0	1	2	1	0	2	0	0	0	0	1	1	0	3	1	0	2	1	2	0	0	0	0	0	3	0	1	0	0	0	0	4	1
OTU_720	0	0	0	0	0	0	0	1	0	0	0	0	0	0	1	0	0	0	0	0	0	0	0	0	0	0	0	0	0	0	0	0	1	0	0	0	0	0	1	0	0	0	0	0	0	0	0	1	1
OTU_1548	0	1	1	2	2	0	1	4	0	2	2	1	1	1	1	1	0	1	2	0	0	0	3	2	1	3	0	0	1	2	0	0	0	2	1	0	0	1	0	2	0	3	1	0	1	0	1	1	0
OTU_397	3	0	2	1	0	2	0	1	2	0	0	2	0	0	1	2	0	1	0	1	0	1	1	1	1	0	1	0	2	0	0	1	0	0	2	2	2	1	0	1	1	1	0	1	0	2	1	1	2
OTU_633	2	0	0	0	0	0	0	0	0	0	0	0	2	0	0	0	0	2	0	0	0	2	0	0	0	0	0	0	0	1	0	0	0	0	2	0	0	0	0	0	0	0	0	0	0	0	0	0	0
OTU_481	0	1	1	0	0	0	1	1	0	1	0	1	0	0	0	0	0	1	2	0	0	0	0	0	2	0	0	0	0	0	0	1	0	0	0	0	0	0	1	0	1	0	2	1	0	1	0	0	0
OTU_1499	1	2	2	1	0	3	0	0	1	0	0	1	0	3	0	1	1	3	0	0	2	0	2	0	1	0	0	2	4	1	0	1	1	2	0	2	1	2	0	1	1	5	2	1	0	1	1	0	0
OTU_987	1	0	0	0	0	1	0	0	1	0	0	0	1	0	0	1	1	0	1	1	0	0	0	0	0	1	0	0	0	0	0	0	1	0	0	2	0	0	0	1	0	1	1	2	0	0	1	0	0
OTU_504	0	0	4	1	0	1	2	1	0	1	0	0	0	2	0	0	1	1	3	1	0	2	0	5	0	0	1	3	1	4	1	2	0	0	0	0	0	2	1	2	0	2	4	1	0	0	2	1	2
OTU_1857	0	0	0	0	0	0	1	0	0	0	0	0	0	0	0	0	0	0	0	0	0	0	0	0	0	1	1	0	0	0	3	0	0	0	0	0	0	0	0	0	0	0	2	0	0	0	0	0	0
OTU_540	0	0	2	0	0	1	1	0	0	0	3	0	0	1	0	0	0	0	1	0	0	0	0	1	0	0	2	1	0	1	1	2	0	1	1	0	0	0	0	1	0	2	1	0	2	0	2	0	0
OTU_652	0	0	0	0	0	1	0	0	0	1	0	0	0	0	0	0	1	0	0	0	0	0	0	0	0	0	0	0	0	0	1	0	0	0	0	0	0	0	0	0	0	1	0	0	0	0	0	0	0
OTU_886	0	1	0	0	1	0	0	0	1	1	0	0	0	0	0	1	1	0	0	0	0	1	1	1	0	0	0	0	1	0	0	1	1	1	0	1	0	1	2	0	0	1	0	3	0	1	0	0	0
OTU_948	1	0	0	0	0	0	0	0	0	0	0	4	0	0	0	0	0	0	0	0	0	0	0	0	0	0	0	0	0	0	0	0	0	0	0	0	0	0	0	0	0	0	0	0	1	0	0	0	0
OTU_262	1	1	2	1	0	0	0	0	2	1	1	1	0	0	1	0	1	1	1	0	2	2	2	3	2	0	2	0	1	0	2	1	0	1	2	2	0	0	2	2	1	0	1	2	1	0	1	2	0
OTU_446	0	1	0	0	0	0	0	0	0	0	2	0	1	0	1	0	1	0	0	1	0	0	0	0	0	2	0	0	2	0	0	0	0	0	1	0	2	0	0	0	0	1	0	0	0	0	0	0	0
OTU_2164	0	0	0	1	0	1	1	0	0	0	0	0	1	0	0	0	0	0	0	0	0	0	0	0	0	0	0	0	0	0	0	0	0	0	0	0	0	0	0	0	0	0	7	0	0	1	0	0	0
OTU_1902	0	0	0	0	1	0	0	0	0	0	0	0	0	1	0	0	1	0	0	1	0	1	0	0	0	0	0	0	0	1	0	0	1	3	0	0	0	1	0	0	0	0	0	0	0	0	0	0	1
OTU_1538	1	0	0	3	0	1	0	1	1	1	0	0	0	0	0	0	0	0	0	0	3	0	0	0	0	1	0	1	0	0	0	1	0	0	1	0	0	0	0	0	1	1	0	1	1	1	0	0	0
OTU_797	0	0	0	0	0	0	0	1	0	0	0	0	1	0	0	0	0	0	0	0	0	0	2	0	0	0	1	0	0	0	0	0	0	0	0	0	0	0	0	0	0	0	0	0	0	0	0	0	0
OTU_436	1	3	2	1	1	3	0	0	0	2	4	0	4	2	2	1	1	1	1	1	4	4	2	2	2	1	0	2	3	0	1	3	0	2	2	3	0	1	1	1	5	2	2	4	2	3	2	3	1
OTU_2523	0	0	0	0	0	0	0	0	0	0	0	0	0	0	0	0	1	0	0	0	0	0	0	0	0	0	0	0	1	0	0	0	0	0	0	0	0	0	0	0	0	0	0	0	0	0	0	0	0
OTU_249	4	1	0	5	7	5	1	0	3	1	1	3	0	3	0	0	2	2	0	0	0	0	0	1	5	3	2	6	0	0	0	0	0	3	0	1	2	6	1	5	0	2	0	0	0	2	1	5	1
OTU_1387	0	0	0	0	1	0	0	0	0	0	0	0	0	0	0	0	0	1	0	0	0	0	0	0	0	0	0	0	0	0	1	0	1	1	1	1	0	0	0	0	1	0	0	0	0	0	0	0	0
OTU_1089	2	0	0	0	1	0	5	0	1	1	2	1	0	1	0	0	1	2	0	0	1	0	0	0	1	0	0	0	0	0	0	0	0	2	0	0	0	0	2	0	0	1	2	0	0	2	1	0	0
OTU_2185	0	0	0	0	0	0	0	0	0	0	0	0	0	0	0	0	0	0	0	0	0	0	0	0	0	0	0	0	0	0	0	0	0	0	0	1	0	0	0	0	0	0	0	0	0	0	0	0	0
OTU_2245	0	0	0	0	0	0	0	0	0	0	0	0	0	0	0	0	0	0	0	0	0	0	0	0	0	0	0	0	0	0	1	0	0	0	0	0	0	0	0	0	0	0	0	0	0	0	0	0	0
OTU_1102	1	0	0	0	0	0	1	0	0	1	0	0	0	0	0	0	0	0	1	0	0	0	0	0	0	2	0	0	0	0	0	0	0	0	0	0	0	0	0	0	0	0	0	0	0	0	3	0	0
OTU_1935	0	0	0	1	0	0	0	0	0	0	0	0	0	0	0	0	0	0	0	0	0	0	0	0	0	0	0	1	0	1	0	0	0	0	0	0	0	0	0	0	0	0	0	0	0	0	0	0	0
OTU_1734	0	1	0	0	1	1	0	0	2	0	1	1	0	0	1	1	0	0	1	2	0	0	1	1	1	0	0	1	0	0	0	0	0	0	0	0	2	1	2	1	0	0	0	1	1	1	1	0	0
OTU_1057	0	1	0	1	1	0	1	0	0	0	0	0	0	0	0	0	0	0	1	0	0	0	0	0	0	0	0	0	1	0	0	0	0	0	0	0	0	0	0	0	0	0	1	1	0	0	0	0	0
OTU_747	1	0	0	1	0	0	0	1	0	0	0	1	2	0	1	0	0	0	1	2	1	0	2	0	0	1	1	0	2	0	1	0	0	0	1	1	0	1	0	1	0	0	0	0	0	0	0	1	3
OTU_319	0	1	1	0	3	3	3	0	1	2	4	2	2	1	1	0	1	3	1	1	0	0	0	0	1	3	2	2	3	0	2	2	3	0	0	6	3	2	2	1	0	0	1	5	4	2	0	5	1
OTU_1676	0	1	0	1	0	0	0	0	0	0	0	0	0	0	0	0	0	0	0	0	0	0	0	0	0	1	0	0	0	0	0	1	0	0	1	1	0	1	1	0	0	0	0	1	0	0	0	0	0
OTU_35	4	0	3	6	2	8	2	1	7	3	8	19	0	3	4	1	1	4	3	1	2	1	2	4	4	5	1	4	5	2	4	2	5	10	1	3	3	10	6	3	1	2	0	5	5	1	10	1	0
OTU_171	2	3	2	1	0	5	0	1	0	0	1	1	0	1	2	0	2	2	3	0	0	0	0	1	2	2	2	3	0	0	1	4	0	3	0	0	5	1	0	1	1	1	0	1	1	1	1	1	1
OTU_501	0	0	0	1	1	0	0	0	1	0	1	1	1	0	0	0	0	0	0	2	0	0	0	0	0	0	1	2	0	0	1	0	0	0	0	2	1	3	2	0	0	0	0	0	0	0	0	0	0
OTU_1065	0	1	0	0	1	0	0	0	0	0	0	0	0	0	0	1	1	0	0	0	0	0	0	0	0	0	0	0	0	0	2	0	0	0	0	0	0	0	0	0	0	0	1	0	0	0	0	0	1
OTU_449	1	0	0	0	1	0	4	0	0	1	0	0	0	0	2	0	0	2	0	0	1	1	0	2	3	2	0	1	1	1	0	1	0	0	0	1	1	3	0	0	2	2	0	1	0	0	0	0	0
OTU_853	0	0	0	0	1	0	0	0	0	0	0	0	1	0	1	1	0	0	1	0	1	1	0	0	0	0	1	0	1	0	4	0	0	0	0	0	0	0	1	1	0	0	2	0	0	1	1	0	2
OTU_379	0	1	0	0	3	1	2	0	1	1	0	1	3	1	2	0	1	0	0	1	2	1	1	1	1	0	0	1	0	2	1	0	1	0	0	0	0	0	1	2	1	0	2	1	1	0	1	0	0
OTU_697	2	2	0	2	1	1	0	3	1	3	0	0	1	2	1	0	0	4	0	1	1	0	0	5	1	0	2	0	1	0	0	0	1	0	0	0	1	2	0	1	0	0	2	0	1	1	0	0	0
OTU_457	0	1	1	0	1	0	1	0	1	3	0	3	1	1	0	0	1	2	0	0	1	0	0	0	0	0	1	0	1	0	2	2	0	6	0	0	0	1	0	1	3	1	1	0	1	0	0	0	0
OTU_494	1	0	0	0	0	1	2	0	2	1	3	2	0	1	0	0	0	0	0	1	1	1	1	0	0	2	0	0	0	1	1	0	0	0	0	0	1	0	0	0	0	0	1	0	0	0	1	0	0
OTU_1179	0	1	0	0	0	0	0	0	0	0	0	0	0	0	0	0	0	0	0	0	0	0	0	0	0	0	0	0	0	0	0	0	0	0	0	1	0	0	0	0	0	0	0	1	0	6	0	0	0
OTU_535	0	0	0	0	2	0	0	1	2	0	2	0	3	0	0	0	2	1	3	0	0	2	1	3	0	0	0	0	1	0	2	0	1	0	2	0	1	0	0	0	1	1	1	1	0	0	1	0	0
OTU_78	0	2	2	6	1	2	3	0	1	0	2	4	1	2	7	1	3	1	0	2	0	0	3	2	3	2	1	2	2	0	1	1	2	0	2	1	3	4	1	0	0	0	0	6	4	2	1	0	1
OTU_75	4	6	3	2	3	2	2	2	10	1	3	15	10	7	5	10	6	1	7	12	7	9	4	3	7	1	6	6	6	6	4	1	2	0	13	2	9	1	13	2	4	0	6	0	4	4	2	7	4
OTU_62	2	1	2	2	2	4	0	7	3	2	3	0	0	3	2	2	2	5	1	1	2	3	3	0	3	0	3	2	1	3	2	0	0	0	0	1	0	2	0	4	1	1	1	2	2	2	5	1	2
OTU_604	4	5	7	2	7	4	4	11	4	3	3	0	5	4	4	10	4	5	8	5	5	11	5	2	4	6	5	2	11	6	6	4	2	7	4	2	7	5	4	5	4	4	9	4	3	1	2	3	8
OTU_2137	0	0	0	0	0	0	0	0	0	0	0	0	0	0	0	0	0	0	0	2	0	0	0	0	0	0	0	0	0	0	0	0	0	0	0	0	0	0	0	0	0	0	0	0	0	0	0	0	0
OTU_1248	0	0	0	1	0	1	0	0	0	0	0	0	1	0	0	0	0	0	0	1	0	0	0	1	0	0	1	0	0	0	1	0	0	0	0	0	0	0	0	0	0	0	0	0	1	0	0	0	1
OTU_334	1	2	0	2	0	2	0	0	0	0	1	2	0	3	1	2	3	1	1	0	0	0	6	1	2	1	1	2	1	3	0	2	0	0	0	3	0	0	1	1	1	2	1	2	5	1	0	1	0
OTU_1960	0	0	0	0	0	0	0	0	0	0	0	0	0	0	0	0	1	0	0	0	0	0	0	0	0	0	2	0	0	0	0	0	0	0	0	0	0	0	0	0	0	0	0	0	0	0	0	0	0
OTU_1373	0	1	0	0	0	0	0	0	0	0	0	0	0	1	1	0	1	0	0	0	0	0	2	1	0	0	0	1	0	1	0	0	0	0	0	0	0	0	0	0	1	2	0	1	0	0	0	0	0
OTU_1853	0	0	0	0	0	0	0	0	0	0	0	0	0	1	0	0	0	0	0	0	0	0	0	0	0	0	0	0	0	0	0	0	0	0	0	0	0	0	0	0	0	0	0	0	0	0	0	0	0
OTU_1271	0	0	0	0	0	0	0	0	0	0	0	0	0	0	0	0	0	0	0	0	0	0	0	0	0	0	0	0	0	0	0	1	0	4	0	0	0	0	0	0	0	0	0	0	0	0	0	0	0
OTU_508	1	0	0	0	1	0	0	0	2	0	0	1	0	0	0	0	0	0	0	0	1	0	0	1	0	0	0	2	0	0	0	0	0	0	0	0	0	0	0	1	0	0	0	0	0	0	0	0	0
OTU_2121	0	0	0	0	0	0	0	0	0	0	0	0	0	0	0	0	0	0	0	0	0	0	0	0	0	0	0	0	0	0	0	2	0	0	0	0	0	0	0	0	0	0	0	0	0	0	0	0	0
OTU_159	2	1	0	3	9	3	3	0	0	0	5	4	0	3	2	1	0	3	0	0	0	0	0	0	3	5	0	1	0	0	0	0	0	0	0	1	3	5	1	5	0	0	0	0	9	3	0	1	1
OTU_950	0	0	0	0	0	0	0	0	0	0	1	0	0	0	0	1	0	0	0	0	0	0	0	0	0	0	1	1	1	0	0	0	0	0	0	0	0	0	0	0	1	2	0	0	0	0	0	0	1
OTU_597	0	0	1	0	0	0	0	0	0	0	0	0	0	0	1	0	0	0	0	2	1	0	2	0	1	0	1	0	0	0	0	0	0	0	0	0	1	0	0	0	0	0	0	0	2	0	0	0	0
OTU_1651	0	0	0	0	0	1	0	0	0	0	1	0	0	0	0	0	0	0	0	0	0	0	0	0	0	0	0	0	0	0	0	0	0	0	0	0	0	1	0	0	0	0	0	0	0	0	0	0	0
OTU_486	4	1	2	0	4	0	0	0	1	3	1	0	0	0	0	1	0	1	1	0	0	0	0	1	0	3	0	0	3	0	0	0	1	3	2	2	0	0	1	1	1	1	0	2	0	2	2	2	1
OTU_592	0	0	0	0	0	0	0	0	0	0	0	0	0	0	0	0	0	0	0	0	0	0	0	0	0	0	0	0	0	0	0	0	0	0	0	0	0	0	0	0	0	0	0	0	0	0	0	0	0
OTU_338	2	1	0	2	0	0	2	2	0	0	0	0	1	1	3	1	0	2	3	0	0	1	0	1	0	0	2	0	3	0	2	1	0	0	1	2	1	2	1	0	1	2	3	2	3	1	1	3	2
OTU_641	0	1	0	0	0	2	1	0	0	2	0	0	0	0	0	0	0	1	1	0	0	0	2	0	0	1	1	0	0	0	0	0	1	0	1	0	0	1	1	1	0	0	0	2	0	0	0	0	0
OTU_1221	0	0	0	0	0	0	0	0	0	0	0	0	1	1	0	0	0	1	1	0	0	0	0	0	0	0	0	0	0	0	0	0	0	0	0	0	0	0	0	1	0	0	0	0	0	0	0	0	0
OTU_2526	0	0	0	0	0	0	0	0	0	0	0	0	1	0	0	0	0	0	0	0	0	0	0	0	0	0	0	0	0	0	0	1	0	0	0	0	0	1	0	0	0	0	0	1	0	0	0	0	0
OTU_247	0	1	0	3	2	0	0	0	0	0	2	1	1	1	2	0	1	0	2	0	0	0	0	2	2	2	1	4	2	1	2	0	0	6	0	0	0	2	2	0	2	5	0	1	2	2	5	1	1
OTU_1015	0	0	0	0	0	0	1	0	1	0	0	0	0	0	0	0	0	0	0	0	0	0	0	0	0	0	0	0	1	0	0	0	0	0	0	0	0	0	0	0	0	0	0	0	0	1	0	0	0
OTU_1279	0	0	1	0	0	0	0	0	0	0	0	1	0	1	1	2	0	0	0	0	0	0	0	0	0	0	1	0	0	0	0	0	0	0	1	0	0	0	0	0	0	0	0	0	0	0	0	0	1
OTU_717	0	0	0	0	1	0	0	0	0	0	0	0	0	0	0	1	0	0	0	0	0	0	0	0	0	0	0	0	0	0	0	0	10	0	0	0	0	0	0	0	0	0	0	0	1	0	0	0	0
OTU_420	0	2	1	0	3	2	0	0	0	0	0	2	2	1	0	2	0	1	0	2	1	2	0	0	2	2	1	2	1	0	0	0	0	0	0	0	1	0	0	2	1	0	1	0	2	2	1	2	0
OTU_248	0	0	0	5	0	0	1	0	0	1	2	0	0	0	0	0	0	0	0	0	0	0	0	1	1	0	0	0	0	0	2	0	0	1	0	0	0	1	0	0	0	1	0	2	0	0	1	0	0
OTU_574	0	0	0	0	0	4	2	1	1	1	0	0	0	0	0	0	0	1	0	0	0	1	0	1	0	0	0	0	1	3	0	0	0	0	0	0	0	0	1	0	1	0	0	0	0	0	1	0	1
OTU_492	1	0	0	0	0	0	0	0	1	0	0	0	0	0	1	0	0	0	0	0	0	0	0	2	0	1	0	0	0	0	0	3	0	0	1	0	2	0	0	0	2	0	1	0	0	1	0	0	2
OTU_805	1	1	0	1	0	2	0	0	0	1	0	0	0	0	0	0	0	0	0	0	0	0	4	0	0	0	1	0	0	0	0	0	0	0	0	1	1	0	0	1	0	0	0	0	1	0	0	0	0
OTU_2348	0	0	2	0	0	0	0	0	0	0	0	0	0	0	2	0	1	0	0	0	0	1	0	2	3	0	0	0	0	4	0	0	0	1	0	0	0	0	0	1	0	4	0	0	0	0	0	0	0
OTU_410	0	1	0	1	0	1	2	0	1	2	2	2	0	1	0	1	2	3	0	0	2	0	0	0	1	0	0	4	0	1	0	2	0	2	0	3	0	0	0	1	1	2	0	4	0	0	2	0	0
OTU_810	0	0	1	1	0	1	0	0	0	1	0	0	0	0	0	0	0	0	0	0	0	2	1	0	1	0	0	1	1	1	2	4	0	1	1	0	0	0	0	0	1	0	3	0	1	0	0	1	1
OTU_1012	1	1	0	1	1	1	0	0	0	0	0	0	0	3	1	0	0	1	1	0	0	0	0	1	2	0	0	0	0	2	0	0	1	0	0	1	0	1	0	0	0	0	0	0	1	0	0	0	0
OTU_2041	0	0	0	0	0	1	0	0	0	0	0	0	0	0	1	1	0	0	0	0	0	0	0	0	0	0	0	0	0	0	0	0	0	0	0	0	0	0	0	0	0	0	0	0	0	0	0	0	0
OTU_1367	0	1	0	0	0	0	0	1	0	0	0	0	0	0	0	2	0	0	1	0	0	0	0	0	0	0	1	0	0	0	0	0	0	0	0	0	0	0	0	0	1	0	0	0	0	1	0	0	0
OTU_1083	2	3	0	1	6	2	2	0	1	1	3	3	1	2	0	0	0	0	1	2	2	2	0	4	0	1	3	2	0	0	1	0	0	3	0	2	4	1	0	4	1	2	1	5	2	5	4	0	0
OTU_609	0	3	2	1	1	0	0	0	1	1	1	0	3	0	0	0	0	0	0	1	1	0	0	1	2	0	1	1	1	1	2	0	3	1	0	1	2	0	1	3	0	2	1	1	0	0	0	1	1
OTU_961	0	1	1	0	0	1	0	0	0	0	0	0	0	0	0	0	0	0	0	1	0	0	0	0	0	0	0	0	1	1	3	3	0	0	1	1	0	0	0	0	0	0	0	0	0	0	0	0	0
OTU_385	0	0	0	1	1	1	0	0	1	0	0	0	0	1	0	0	1	1	0	1	1	0	0	0	0	0	0	0	0	1	1	1	0	0	0	0	0	1	0	0	1	1	0	0	0	1	0	0	0
OTU_2356	0	0	0	0	0	0	0	0	0	0	0	0	0	0	0	0	0	0	0	0	0	0	0	0	0	0	0	0	0	0	0	0	0	0	0	0	0	0	0	0	0	0	0	0	0	0	0	0	0
OTU_846	0	1	0	0	0	0	1	0	0	0	0	0	0	0	0	0	0	0	1	0	0	0	0	0	0	0	0	1	0	1	0	0	0	1	0	0	0	1	0	0	0	0	0	0	0	0	0	0	0
OTU_366	2	0	0	2	0	0	0	0	0	0	0	0	0	0	2	0	0	1	0	2	0	0	0	0	0	0	0	1	0	0	0	0	0	0	0	2	0	0	0	0	0	0	2	0	0	1	0	0	0
OTU_390	0	0	0	1	0	0	0	1	0	1	0	1	0	0	0	0	1	2	1	0	0	0	1	0	12	1	0	1	2	1	0	0	0	0	0	0	2	1	1	0	1	0	0	0	1	1	0	1	0
OTU_1961	0	0	0	0	0	1	0	1	0	0	0	1	0	0	0	0	0	0	0	0	0	3	0	0	0	0	0	0	0	0	0	2	0	0	0	0	0	1	0	0	0	1	1	1	0	0	0	0	1
OTU_710	0	0	0	0	0	0	0	0	1	0	0	0	1	0	0	1	1	0	0	0	0	0	0	0	0	0	3	0	0	0	4	0	1	0	0	0	0	0	0	1	1	0	0	0	0	0	0	0	1
OTU_141	0	1	1	0	0	1	4	1	0	1	4	1	2	0	0	1	0	2	2	0	0	3	6	0	0	2	1	2	0	5	0	8	4	1	0	2	0	3	0	1	2	3	0	0	0	0	0	0	1
OTU_1895	0	0	0	0	0	0	1	1	0	0	0	0	0	0	0	0	0	0	0	0	1	0	0	0	0	0	0	0	0	0	0	0	0	0	0	0	0	0	0	0	0	0	0	0	0	0	0	0	0
OTU_240	1	0	0	1	1	1	0	0	1	2	2	3	4	0	1	1	1	0	1	1	0	0	0	1	1	0	4	1	0	0	1	0	0	1	1	1	3	0	4	1	0	1	1	2	1	1	1	2	3
OTU_836	0	0	1	0	0	0	0	0	2	0	0	0	0	0	0	0	0	1	0	0	0	0	0	0	0	0	0	0	0	0	0	1	0	0	1	0	0	0	0	0	0	0	0	0	0	0	0	1	0
OTU_408	1	2	0	2	1	0	2	0	1	2	1	1	0	0	0	1	0	0	1	0	0	1	2	1	0	1	1	2	0	0	1	1	0	0	1	0	0	0	0	3	0	0	0	0	0	1	0	0	1
OTU_195	4	0	0	0	1	2	2	0	0	2	1	3	0	1	2	0	0	1	0	1	1	1	3	1	1	0	2	0	0	0	2	1	0	2	1	0	2	2	0	1	0	1	0	0	1	0	1	0	2
OTU_231	0	2	2	0	0	0	0	4	0	0	2	0	9	0	0	0	0	0	1	1	1	2	0	1	0	0	0	0	0	0	0	0	4	0	4	1	0	0	1	0	0	0	0	0	0	1	0	1	1
OTU_448	1	3	3	2	4	3	0	0	2	2	2	1	6	2	1	3	13	0	0	2	2	2	1	0	3	2	1	3	2	2	13	4	5	2	5	0	4	2	4	3	2	1	5	1	0	1	2	4	5
OTU_190	2	0	0	2	1	1	0	0	0	0	2	1	0	2	0	0	0	2	0	1	0	0	1	1	1	0	0	1	0	2	0	3	0	3	0	1	0	1	0	0	1	5	0	1	0	0	0	0	0
OTU_2368	0	0	0	0	0	0	0	0	0	0	0	0	0	0	0	0	0	0	0	0	0	0	0	0	0	0	0	0	0	0	0	0	0	1	0	0	0	0	0	0	0	0	1	0	0	0	0	0	1
OTU_272	2	1	1	1	2	2	1	2	7	2	1	1	4	1	0	2	3	1	2	0	2	0	3	0	1	0	0	4	2	4	0	3	1	1	1	2	0	0	1	0	1	2	1	0	0	2	0	0	1
OTU_278	0	2	0	1	0	2	3	1	3	1	1	0	1	1	1	1	0	1	1	1	0	0	2	1	1	5	0	0	1	1	0	2	0	1	0	2	2	2	0	0	1	1	0	0	0	3	2	0	1
OTU_895	1	0	0	0	1	0	0	0	0	1	0	1	0	0	5	0	0	0	0	1	0	0	1	0	1	0	1	1	2	3	0	0	0	0	0	0	0	1	0	0	0	0	0	1	0	0	0	0	0
OTU_882	0	0	0	0	1	0	0	0	0	0	0	0	0	0	0	0	7	0	1	0	3	0	0	0	0	0	0	0	0	1	0	0	1	0	0	0	0	0	0	1	0	0	0	0	0	0	0	0	0
OTU_831	0	0	0	0	0	1	0	0	2	0	0	0	0	1	0	0	0	0	2	0	0	0	0	0	0	0	0	0	0	0	0	0	0	0	0	0	0	0	0	2	0	0	0	0	0	0	0	1	0
OTU_580	2	3	0	0	4	2	3	1	1	2	0	4	2	3	2	0	0	1	0	2	1	1	4	7	8	5	1	4	1	1	1	0	0	1	0	6	4	3	3	3	2	0	1	1	2	2	1	0	0
OTU_763	0	0	0	0	0	0	0	1	0	0	0	1	1	0	0	0	0	0	0	0	0	0	0	0	0	0	0	0	0	0	0	0	0	0	0	2	0	0	0	1	0	0	0	0	0	1	0	0	0
OTU_2556	0	0	0	0	1	1	2	0	0	0	1	1	0	1	0	0	0	0	0	1	0	0	0	1	0	0	0	0	0	1	0	0	0	0	0	0	0	2	0	0	0	1	1	0	1	0	1	0	0
OTU_2014	0	0	0	0	1	0	0	0	1	0	0	0	0	0	0	0	0	0	1	1	0	0	0	0	1	0	0	1	0	0	0	3	0	0	0	0	2	0	0	0	0	1	1	0	0	0	0	1	0
OTU_2465	0	0	0	0	0	0	0	0	0	0	0	0	0	0	0	0	0	0	0	0	0	0	0	0	0	1	0	0	0	0	0	0	0	0	0	0	0	0	0	0	0	0	0	0	0	0	1	0	0
OTU_655	0	2	1	0	1	0	1	0	1	0	0	0	0	0	0	0	1	0	0	0	0	0	0	0	0	0	1	0	0	1	0	0	0	0	0	0	1	0	0	0	0	3	0	0	0	0	1	0	1
OTU_1560	0	0	0	0	0	0	0	0	0	0	0	1	0	0	0	0	0	0	0	0	0	0	0	0	0	0	0	1	0	0	0	0	0	0	0	0	1	0	0	0	0	0	0	0	0	0	0	0	0
OTU_2412	0	0	0	0	0	0	0	0	0	0	0	0	0	0	0	0	0	0	0	0	0	0	0	0	0	0	0	1	0	0	0	0	0	0	0	0	0	0	0	0	0	0	0	0	0	0	0	0	0
OTU_2359	0	0	0	0	0	0	0	0	0	0	0	0	0	0	0	0	0	0	0	0	0	0	0	0	0	0	0	0	0	1	0	0	0	0	0	0	0	0	0	0	0	0	0	0	0	0	0	0	0
OTU_294	1	1	8	1	0	0	0	1	0	0	3	0	2	0	2	4	2	1	0	2	1	1	0	0	0	0	0	0	1	0	5	1	0	0	1	0	2	0	0	0	1	0	1	0	1	0	0	4	5
OTU_722	0	1	0	0	0	2	1	0	0	1	0	1	0	0	0	1	4	1	0	0	1	0	0	1	2	1	0	2	1	1	0	1	2	0	0	0	1	1	0	0	0	1	0	0	0	0	0	0	0
OTU_151	2	2	5	2	5	3	1	2	9	3	2	6	1	2	1	2	2	1	1	0	3	1	2	0	2	4	0	2	1	2	0	2	0	1	0	2	6	6	1	3	3	1	0	2	2	1	1	0	0
OTU_1852	0	0	0	0	0	0	0	0	1	0	0	0	0	0	0	0	0	0	0	0	0	0	0	0	0	0	0	0	0	0	0	0	0	0	0	0	0	0	0	0	0	0	0	0	0	0	0	0	0
OTU_438	2	1	0	0	0	3	1	1	3	1	5	0	5	1	2	2	0	2	0	2	2	1	1	2	1	4	0	1	0	2	0	4	2	2	0	1	1	1	0	1	1	0	0	1	1	1	3	4	1
OTU_835	0	0	0	0	0	0	0	0	0	0	1	1	0	0	0	0	0	1	0	0	0	0	3	0	0	0	0	0	0	0	0	0	0	0	0	0	1	0	0	1	0	0	0	1	1	0	0	0	3
OTU_2089	0	0	0	0	0	0	0	0	0	0	0	0	0	0	0	0	0	0	0	1	0	0	0	0	0	0	0	0	0	0	0	0	0	0	0	0	0	0	0	0	0	1	1	0	0	0	0	0	0
OTU_918	0	0	0	0	0	0	0	0	0	0	1	0	0	0	0	0	0	0	0	0	0	0	1	1	1	0	0	0	0	0	0	1	0	0	0	0	1	0	0	0	0	0	0	0	0	0	0	0	0
OTU_1693	0	0	0	0	0	0	0	0	0	0	0	0	0	1	0	0	0	0	0	0	0	0	0	0	0	0	0	0	0	0	0	0	0	0	0	0	0	0	2	0	0	0	0	0	0	0	0	0	0
OTU_2376	0	0	0	0	0	1	0	0	0	0	0	0	0	0	1	0	0	0	0	0	0	0	0	0	0	0	0	0	1	0	0	1	0	1	0	0	0	0	0	0	0	0	0	0	0	1	0	0	0
OTU_1200	0	0	0	0	1	0	0	0	0	0	0	0	0	0	0	0	0	0	0	0	0	0	0	1	2	0	0	0	0	0	0	0	0	0	0	0	0	0	0	0	0	0	0	0	0	0	0	0	0
OTU_553	0	0	0	0	1	0	0	0	1	1	0	0	2	0	0	0	0	1	1	0	0	1	0	0	2	0	0	0	0	0	0	0	1	0	0	0	0	0	2	0	0	0	0	0	0	0	0	4	1
OTU_914	0	0	0	0	0	0	0	0	0	0	1	0	0	0	0	0	0	0	0	0	0	0	1	0	0	0	0	0	0	0	0	1	0	0	0	0	0	0	2	0	0	0	0	0	0	0	0	0	0
OTU_701	2	0	0	0	0	1	0	0	0	0	0	3	0	0	0	0	0	1	0	0	0	0	0	0	1	0	0	0	0	0	0	0	0	0	0	0	0	1	0	0	0	0	0	0	0	0	0	0	0
OTU_1388	0	1	0	0	0	0	0	0	0	1	0	1	0	2	1	0	0	0	0	0	0	0	1	0	0	0	0	0	5	0	1	0	0	0	0	0	0	0	1	0	1	0	0	0	1	0	0	4	0
OTU_1914	0	0	0	0	0	1	2	0	0	0	0	0	1	0	2	0	0	0	0	0	0	0	0	0	0	0	0	0	2	0	0	0	1	0	0	0	0	1	1	0	0	0	0	0	1	0	1	2	0
OTU_562	2	1	0	0	0	0	0	0	0	3	0	0	4	0	1	2	0	0	0	1	2	1	0	2	0	2	0	0	0	3	1	1	3	2	0	0	2	0	0	1	1	3	0	0	1	0	1	1	2
OTU_121	4	0	2	0	0	3	2	1	1	1	5	3	1	1	1	0	0	3	2	0	0	0	2	0	2	1	3	1	0	0	1	2	1	2	1	1	1	1	0	1	1	1	0	2	3	1	1	0	2
OTU_637	1	0	0	1	1	1	0	1	0	0	0	0	0	1	0	1	1	1	1	0	1	0	0	0	0	0	1	0	0	0	1	0	0	1	1	0	1	0	0	0	1	1	1	0	1	0	0	1	0
OTU_1219	0	0	0	0	0	1	0	0	1	0	0	0	0	0	0	0	1	0	0	0	0	0	0	0	0	0	0	1	0	0	0	0	0	0	0	0	0	0	0	2	3	0	0	0	0	0	0	0	0
OTU_1088	0	0	1	0	0	0	0	0	0	0	0	0	0	0	0	0	1	0	1	1	0	0	0	0	0	1	0	0	0	0	0	1	0	0	0	1	0	0	1	1	0	0	0	0	0	0	0	0	0
OTU_631	0	0	0	2	1	0	1	1	0	0	2	1	0	0	0	0	0	1	1	0	0	1	0	0	0	3	0	1	0	0	4	0	0	0	0	1	1	0	0	1	0	1	0	2	0	1	0	1	0
OTU_100	4	9	4	1	6	2	0	4	3	0	0	2	9	7	7	13	3	0	7	6	6	2	0	0	5	1	5	4	0	0	1	1	1	0	8	2	7	2	2	8	6	2	1	0	1	2	0	2	7
OTU_1278	0	0	0	0	0	0	0	0	0	0	0	0	0	0	0	0	0	0	0	0	0	0	0	0	0	0	0	0	0	0	0	0	0	0	0	0	0	0	0	0	0	0	0	0	0	0	0	0	0
OTU_421	0	1	0	2	0	3	2	0	1	1	0	1	0	0	0	0	0	0	0	0	0	2	0	0	2	0	0	0	0	0	0	0	0	0	0	0	0	2	0	0	0	2	0	1	0	2	0	0	0
OTU_152	4	2	4	3	3	2	3	2	2	1	3	3	4	1	5	1	0	2	2	1	1	2	2	0	5	3	3	4	1	1	1	0	2	2	28	3	2	1	2	4	1	2	0	2	1	3	5	1	1
OTU_524	0	0	0	0	0	0	1	2	0	0	0	0	0	0	0	0	0	0	0	0	0	0	0	0	0	0	2	0	0	2	0	0	2	2	0	0	0	0	1	1	0	2	1	0	1	0	0	1	1
OTU_532	0	0	0	0	0	0	0	1	0	0	1	0	0	0	0	0	1	1	0	0	0	1	0	0	0	0	0	0	0	2	0	1	0	1	2	0	0	0	0	0	2	0	1	0	0	1	3	1	1
OTU_1897	0	0	0	0	0	0	0	0	0	0	0	0	0	0	0	0	0	0	0	0	0	0	0	1	0	0	0	0	0	0	0	0	1	0	0	0	0	0	0	0	0	0	0	0	0	0	0	0	0
OTU_328	0	0	0	0	1	0	1	0	0	0	0	1	0	0	0	0	0	0	2	0	1	1	0	0	0	0	1	0	1	1	0	0	0	0	0	1	0	0	3	0	0	1	0	0	1	1	0	0	1
OTU_1329	0	0	0	0	0	0	0	0	0	0	0	0	1	1	0	0	0	0	0	1	0	0	0	0	0	0	0	0	0	0	0	0	0	0	0	0	0	0	0	0	0	0	0	0	0	0	0	0	0
OTU_331	0	0	0	2	0	1	0	0	1	0	3	0	0	0	0	0	0	1	1	0	0	0	0	0	2	0	0	1	0	0	0	0	0	0	0	0	1	1	0	0	1	0	0	0	0	0	1	0	1
OTU_322	0	0	0	0	2	0	1	0	0	1	1	1	0	1	0	0	0	0	1	0	0	1	0	0	0	3	0	0	0	0	0	0	0	0	0	1	3	0	0	0	0	0	0	1	0	0	0	0	1
OTU_1117	0	2	2	1	0	0	0	5	2	0	1	0	1	0	1	1	0	0	0	2	1	1	0	0	0	1	1	0	0	0	0	1	3	0	1	0	2	0	3	2	1	1	1	0	1	0	0	1	1
OTU_395	2	2	0	2	0	0	0	0	0	0	1	1	0	0	0	2	0	1	0	1	1	0	1	1	1	0	0	0	0	0	2	0	0	0	1	0	3	0	2	1	1	0	0	1	1	0	0	0	1
OTU_506	0	0	0	0	0	0	0	0	2	0	0	0	0	0	0	0	0	0	0	0	2	0	1	1	0	0	0	1	0	0	0	0	0	0	0	3	0	0	0	0	1	1	0	0	0	1	0	0	0
OTU_1607	0	0	0	0	0	0	0	0	0	0	0	1	0	0	0	0	0	0	0	0	0	0	0	0	0	0	0	0	0	0	0	0	0	0	0	0	0	0	0	0	0	0	0	1	0	0	0	0	0
OTU_858	2	0	0	0	1	0	0	0	0	0	0	0	0	1	0	0	0	0	0	0	0	0	0	0	0	0	0	0	2	0	0	0	0	0	0	0	2	1	0	0	1	0	0	0	0	1	0	0	0
OTU_99	3	2	1	1	5	2	2	8	2	2	2	4	1	1	3	1	1	0	0	1	1	2	1	0	1	1	4	1	5	1	2	3	4	3	5	3	1	0	2	3	3	0	1	2	0	0	1	3	2
OTU_77	2	1	0	8	2	2	3	1	4	2	1	1	1	2	3	0	1	0	0	0	0	1	2	2	6	4	0	1	0	0	0	2	1	2	0	0	2	3	1	0	0	0	1	2	4	1	2	0	2
OTU_307	3	1	0	0	0	1	2	1	1	2	0	1	2	0	0	0	1	0	0	1	2	1	1	4	0	0	0	0	1	3	0	1	2	0	0	0	1	2	1	0	0	0	1	1	0	1	3	2	0
OTU_1108	0	0	0	0	1	0	0	0	0	1	1	0	0	0	0	1	0	1	1	2	0	0	1	0	1	0	1	0	1	0	0	0	0	1	0	0	0	1	0	0	0	0	0	0	0	0	0	0	0
OTU_1508	0	0	0	0	1	0	0	0	0	0	0	0	0	0	0	0	0	0	0	0	0	0	0	0	0	0	0	0	0	0	0	2	0	0	0	0	0	0	0	1	0	0	0	0	0	0	0	0	0
OTU_2361	0	0	0	0	0	0	0	0	0	0	0	0	0	0	0	0	0	0	0	0	0	0	0	0	0	0	0	0	0	0	0	0	0	0	0	0	3	0	0	0	0	0	0	0	0	0	0	0	0
OTU_1188	0	0	0	0	0	0	0	0	0	0	0	0	0	0	1	0	0	0	0	0	0	3	0	0	1	0	0	0	0	1	0	2	0	1	0	0	1	0	0	1	0	0	0	0	0	0	0	0	2
OTU_1093	0	0	0	0	0	0	1	0	0	2	0	0	0	0	0	0	0	0	1	0	0	0	1	2	0	0	0	0	1	0	0	0	0	2	0	0	0	0	0	0	1	0	0	1	0	0	0	0	1
OTU_630	0	0	2	0	0	0	0	1	0	0	0	0	1	0	0	0	0	0	0	0	0	0	0	0	0	0	0	1	0	2	0	0	3	1	0	0	0	0	0	0	0	0	1	0	0	0	0	0	0
OTU_26	0	2	0	3	10	2	3	3	1	7	13	3	6	3	1	2	6	5	5	4	4	1	0	3	3	8	2	2	14	0	1	0	1	0	1	4	7	2	3	0	1	0	2	0	6	6	7	12	0
OTU_2081	0	0	0	0	0	0	0	0	0	0	0	0	0	0	0	0	0	0	0	0	0	0	0	0	0	1	0	0	0	0	0	0	0	0	0	0	0	0	0	0	0	0	0	0	0	0	0	0	0
OTU_1898	0	0	0	0	0	0	0	0	0	0	0	0	0	0	0	0	0	0	0	0	0	0	0	0	0	0	0	0	0	0	0	0	0	0	0	0	0	0	0	0	0	2	0	0	0	0	0	0	0
OTU_496	0	0	0	0	0	0	1	0	0	0	0	0	0	0	0	1	0	0	0	0	0	0	0	1	0	0	0	0	2	0	1	0	0	0	0	0	0	1	0	0	0	0	0	1	0	1	0	0	0
OTU_617	0	0	0	0	0	1	0	0	1	2	1	0	0	1	1	2	0	0	0	1	1	1	1	0	0	0	0	1	1	1	1	0	2	0	2	0	0	1	0	0	1	0	3	0	0	0	0	0	1
OTU_901	0	0	0	0	0	0	0	0	0	0	0	2	1	0	2	0	0	0	0	0	0	0	0	0	0	0	0	0	0	0	0	0	0	0	0	0	1	0	0	2	0	0	0	0	0	0	0	0	0
OTU_968	1	0	0	0	0	0	0	2	1	0	0	1	0	0	1	1	0	0	0	0	0	0	1	0	0	0	0	0	1	3	0	0	1	3	0	2	1	0	4	0	1	1	6	2	1	1	0	2	0
OTU_336	1	3	0	1	1	1	0	0	0	0	1	1	1	1	0	2	7	0	0	0	0	1	0	0	0	0	0	2	0	0	0	0	0	0	0	0	3	0	0	2	0	0	0	0	2	0	2	0	0
OTU_563	0	1	1	2	1	0	0	0	0	0	0	0	0	1	0	2	0	0	1	3	2	0	0	7	0	0	1	0	0	0	0	0	1	0	0	0	0	0	0	0	0	0	1	0	0	0	0	0	0
OTU_529	0	2	0	1	1	1	0	0	0	0	0	0	3	0	0	1	0	0	0	0	0	1	1	0	0	0	0	4	0	0	0	1	3	0	0	1	1	0	1	0	0	0	0	1	2	1	0	0	0
OTU_671	0	0	0	0	0	0	1	0	3	1	0	0	0	0	0	1	1	0	0	0	3	0	0	0	0	1	0	2	0	0	0	0	0	2	0	0	0	0	0	0	0	0	0	0	3	1	0	0	0
OTU_1107	1	0	0	1	0	0	1	0	0	0	0	0	0	0	0	0	1	0	0	0	0	0	0	0	0	0	0	0	0	0	0	0	0	0	0	0	0	0	0	0	0	1	0	1	0	1	0	0	0
OTU_517	2	0	2	0	0	0	1	0	0	0	1	0	1	1	0	1	0	2	0	0	0	0	1	2	1	0	1	0	3	2	1	0	0	0	1	0	1	0	0	0	0	0	0	0	0	0	1	1	2
OTU_218	2	0	0	2	0	0	3	0	1	0	0	0	0	0	0	0	0	0	0	0	0	0	1	2	6	1	0	3	1	0	0	0	0	2	0	0	0	4	0	0	0	0	0	0	0	1	1	0	0
OTU_232	8	4	5	7	1	3	5	4	3	0	4	7	6	7	5	7	6	2	4	6	4	6	1	0	1	4	3	2	3	1	9	1	1	1	7	0	3	0	4	2	9	1	0	5	3	5	3	8	6
OTU_2353	0	0	0	0	0	0	0	0	1	0	0	1	0	0	0	0	1	0	0	0	0	1	0	0	0	0	0	0	1	0	1	0	0	0	0	0	1	0	0	0	0	1	0	0	1	1	0	0	0
OTU_289	0	1	0	0	2	1	1	0	1	1	2	1	0	2	0	3	1	0	1	2	0	0	1	1	2	0	2	1	1	1	0	0	0	0	1	1	2	0	1	0	3	0	3	0	1	0	0	1	1
OTU_1195	0	0	0	0	0	0	0	0	0	0	0	0	0	0	0	0	0	0	0	0	1	0	0	0	0	0	0	1	0	0	0	0	0	0	0	0	0	0	0	0	1	0	0	1	0	0	0	0	0
OTU_1416	0	0	0	1	1	0	0	1	0	0	0	0	0	0	0	0	0	1	1	2	0	0	0	0	0	0	2	1	1	0	12	0	0	1	1	0	0	0	0	0	0	0	2	0	1	1	1	0	0
OTU_318	0	1	5	0	1	2	0	0	1	0	1	0	2	0	3	4	0	0	2	3	0	7	2	0	0	0	0	0	0	3	0	0	1	1	1	0	0	2	1	0	0	1	1	0	1	0	1	1	9
OTU_1144	0	3	2	0	2	0	0	1	3	0	1	0	0	3	1	3	0	2	7	1	0	1	2	0	1	0	0	1	0	1	1	0	5	0	1	0	1	0	0	2	2	2	1	0	0	0	0	1	4
OTU_1283	0	0	1	0	0	0	0	0	0	0	0	0	0	1	0	0	0	0	0	0	0	0	0	0	0	0	0	0	0	0	0	0	0	0	3	0	0	0	0	0	0	0	0	0	0	0	0	0	0
OTU_290	1	0	0	0	0	2	1	0	0	2	1	1	0	2	0	1	0	0	0	0	0	0	4	1	0	1	0	2	0	1	0	0	1	1	1	0	0	1	1	1	2	3	0	0	1	4	0	1	0
OTU_544	0	0	0	0	0	0	1	1	0	0	0	0	0	0	1	0	0	1	0	0	0	1	2	1	0	0	0	2	0	0	0	0	0	0	1	0	0	0	1	0	3	0	1	0	0	0	1	1	0
OTU_1439	0	0	0	0	0	0	0	0	0	0	0	0	0	0	0	0	0	0	0	0	0	0	0	0	0	0	0	0	0	2	0	0	0	0	0	0	0	0	0	0	0	0	0	0	0	0	0	0	0
OTU_707	0	0	0	1	0	0	0	0	0	0	1	0	0	0	0	0	2	0	0	0	0	0	0	0	0	0	0	0	0	0	0	0	1	0	3	0	0	0	0	0	0	0	1	0	0	1	1	2	0
OTU_1412	0	0	0	1	0	0	0	0	0	0	0	0	0	0	0	0	0	0	0	0	0	0	0	1	1	0	0	0	0	0	0	0	0	0	0	0	0	1	0	0	1	0	0	0	1	0	0	0	1
OTU_2372	1	1	3	0	1	1	5	1	1	2	0	2	0	1	1	0	0	0	0	0	0	0	2	1	4	1	0	3	1	1	0	1	2	2	0	0	1	0	0	0	0	6	0	2	1	0	3	0	0
OTU_361	0	1	0	0	1	1	0	1	2	0	1	0	0	1	0	0	1	0	1	0	0	0	2	0	0	0	0	0	4	0	1	1	1	0	0	1	1	0	0	1	0	0	1	0	0	1	0	2	1
OTU_89	1	0	0	2	1	1	1	0	3	2	1	1	0	0	1	0	0	5	0	0	1	1	3	0	8	8	1	2	0	0	0	0	0	0	0	1	3	4	4	3	1	0	0	1	3	2	3	0	1
OTU_108	2	4	1	2	2	3	7	2	4	7	0	4	6	3	3	2	4	5	1	0	7	0	2	6	1	4	3	2	5	7	5	2	1	3	2	3	5	5	10	3	2	5	4	5	6	4	5	2	2
OTU_394	0	1	0	0	0	1	0	0	0	0	0	0	0	0	1	0	1	1	0	0	1	0	0	0	0	0	0	0	0	0	0	0	0	0	1	0	0	0	0	3	1	4	0	1	0	0	1	0	1
OTU_235	2	0	2	0	1	0	0	1	2	2	2	1	0	1	2	1	1	2	1	0	2	4	1	0	0	1	2	0	0	0	1	0	0	0	1	0	0	0	2	1	1	2	1	0	0	0	1	4	1
OTU_167	2	0	2	2	1	0	4	1	0	0	2	0	0	0	1	1	2	0	1	0	1	2	0	1	2	1	1	2	1	0	2	1	0	1	1	1	0	4	0	0	0	0	0	0	2	1	1	0	1
OTU_1214	0	0	1	0	0	0	0	0	0	0	0	0	0	0	0	0	0	0	0	0	0	1	0	0	0	0	0	0	0	0	0	0	0	0	0	0	0	0	0	0	0	0	0	0	0	0	0	0	0
OTU_829	0	0	0	0	0	0	0	0	0	0	0	1	1	0	0	2	0	0	0	0	2	0	0	0	0	0	1	5	0	0	0	0	0	0	1	0	0	0	0	1	0	0	0	1	0	1	0	2	0
OTU_754	2	0	0	0	3	0	1	1	3	2	5	0	2	3	0	0	0	1	0	2	1	0	0	0	0	0	2	0	0	0	1	0	1	0	0	0	2	0	0	0	0	0	0	0	1	0	0	2	0
OTU_427	1	1	1	0	0	0	0	4	0	0	0	1	0	0	1	1	0	0	0	1	0	0	1	0	0	0	1	0	0	0	0	0	0	0	0	1	0	0	0	0	0	0	7	0	0	0	0	0	0
OTU_222	2	1	0	0	2	0	1	2	1	0	0	2	0	0	1	2	0	3	1	0	1	1	1	1	0	2	0	1	0	1	3	2	2	1	1	1	0	4	0	4	3	1	2	0	1	1	3	0	1
OTU_653	0	0	0	0	0	0	0	1	0	0	0	0	2	0	0	0	0	0	0	0	0	0	0	0	0	0	1	0	1	0	0	0	1	0	2	0	0	0	0	2	0	0	0	0	0	0	0	0	2
OTU_135	2	1	2	2	2	1	1	0	1	1	1	2	0	1	1	1	0	1	0	0	0	0	0	0	2	2	0	5	1	0	0	0	1	0	0	0	3	2	0	3	1	0	0	0	0	1	1	0	0
OTU_691	0	0	0	0	0	0	0	0	2	1	0	0	0	0	1	0	0	0	0	0	0	1	0	0	0	2	0	0	0	0	0	0	1	0	1	0	0	0	0	0	1	1	0	0	0	0	0	0	1
OTU_569	0	0	0	0	2	0	3	0	0	1	0	1	0	1	0	1	1	0	0	1	1	1	0	0	0	1	0	2	0	0	0	0	1	2	0	1	0	0	0	2	1	1	1	0	0	1	1	0	0
OTU_1342	0	0	0	0	0	0	0	0	0	0	0	0	0	0	0	0	0	0	0	0	0	0	0	0	0	0	1	0	0	0	0	0	0	0	0	0	0	0	0	0	0	0	0	0	0	0	0	0	0
OTU_110	3	2	5	1	2	1	7	3	1	6	3	2	3	1	4	1	1	1	5	1	1	1	9	3	3	1	0	2	0	4	0	3	2	7	0	3	1	3	3	7	0	7	0	2	4	2	2	3	0
OTU_573	0	0	0	0	0	2	0	0	1	0	0	0	0	2	0	0	0	0	1	0	1	0	0	0	0	0	0	0	0	0	0	2	1	2	1	3	0	4	0	0	0	1	0	0	0	2	0	0	0
OTU_1131	0	0	0	0	0	0	0	0	0	0	0	2	0	0	0	0	0	0	0	0	0	0	0	1	0	1	0	0	0	0	0	0	0	0	0	1	0	0	0	0	0	0	0	0	0	0	0	0	0
OTU_566	0	0	1	0	0	0	1	0	0	0	0	1	0	1	0	1	0	0	0	1	1	0	1	1	0	0	0	2	0	1	0	0	0	3	0	0	1	0	0	0	0	2	1	1	0	0	0	0	0
OTU_736	0	0	1	0	1	0	0	0	0	0	1	0	0	0	0	0	1	0	1	1	0	0	0	0	0	1	0	0	0	0	0	0	0	0	2	0	1	0	0	0	0	0	0	2	0	0	0	1	0
OTU_936	1	0	0	0	0	0	1	0	0	0	0	0	0	0	0	0	0	0	0	0	0	0	0	0	0	0	0	0	0	0	0	1	0	0	0	0	0	1	0	0	0	0	0	0	0	0	0	0	0
OTU_1930	0	0	0	0	0	0	0	0	0	0	0	0	0	1	0	0	1	0	0	0	0	0	0	0	0	0	0	0	0	0	0	0	0	0	0	0	0	0	0	0	0	0	0	0	0	0	0	0	0
OTU_173	2	5	1	3	3	0	2	1	2	0	0	3	1	4	2	1	1	0	4	3	1	1	1	1	0	3	1	2	1	0	1	1	0	1	0	0	2	0	1	0	1	1	0	0	4	2	0	1	1
OTU_115	1	1	1	1	1	2	2	0	2	0	0	2	3	1	1	0	0	0	1	0	2	3	1	2	1	1	2	2	1	0	3	2	1	1	2	0	2	3	0	1	0	1	0	1	2	1	1	4	1
OTU_1586	0	0	1	0	1	0	0	0	0	0	0	0	0	0	0	0	0	0	0	0	0	0	0	0	0	0	0	0	0	0	0	0	0	0	0	0	0	0	0	0	1	0	0	0	0	0	0	0	0
OTU_1322	0	0	0	0	0	0	0	0	0	0	0	0	0	0	0	0	0	0	0	0	0	0	0	0	0	0	0	0	0	0	0	0	0	0	0	0	3	0	0	0	0	0	0	0	0	0	0	0	0
OTU_1888	0	0	0	0	0	0	0	0	1	1	0	0	0	0	0	0	0	0	0	0	0	0	0	0	0	0	0	0	0	0	0	1	0	0	0	0	0	0	0	0	0	0	0	0	0	0	0	0	0
OTU_73	0	0	2	2	2	4	4	0	2	0	2	1	3	1	2	0	3	8	2	0	2	2	1	3	1	3	1	2	0	1	3	3	1	1	0	1	6	7	2	3	1	0	1	4	1	1	1	0	1
OTU_1682	0	0	0	0	0	0	0	0	0	0	0	1	0	0	0	0	0	0	0	0	0	0	0	0	1	0	0	0	0	0	0	0	0	0	0	0	0	0	0	0	0	0	0	0	0	0	0	0	0
OTU_2179	0	0	0	0	0	0	2	0	0	0	0	0	0	0	1	0	0	0	0	1	0	0	0	0	0	0	0	1	0	0	0	0	0	0	0	0	0	0	0	0	0	0	0	1	0	0	1	0	0
OTU_1490	0	0	0	0	0	0	0	0	0	0	0	0	1	0	0	0	0	0	0	1	0	0	0	0	0	0	1	0	0	0	1	0	1	0	0	0	0	0	0	0	0	0	1	0	0	0	0	1	0
OTU_1186	0	0	0	0	0	0	0	0	1	0	0	1	0	0	0	1	0	0	0	1	0	1	1	1	0	0	0	0	0	0	0	0	0	0	0	1	0	0	0	2	0	0	0	0	0	0	0	0	0
OTU_2538	0	0	0	0	1	0	0	0	0	0	1	0	0	0	0	1	0	0	0	0	0	1	0	0	0	0	0	0	0	1	0	0	0	0	1	0	0	0	0	0	0	1	0	0	0	0	0	0	0
OTU_431	1	0	1	1	0	0	0	0	0	0	3	3	1	0	0	0	0	0	0	0	1	1	1	0	1	2	0	0	0	0	0	0	0	1	0	0	2	5	1	1	1	1	0	0	0	0	0	1	0
OTU_2060	0	0	0	0	0	0	0	0	0	0	1	0	0	0	0	0	0	0	0	0	0	0	0	1	0	0	0	0	0	0	0	0	0	0	0	0	0	0	0	0	0	0	0	0	0	0	0	0	0
OTU_1264	0	0	0	0	0	1	1	0	0	0	1	0	0	0	0	0	1	0	0	0	0	0	0	0	0	0	0	0	0	1	0	0	1	0	0	0	0	0	0	0	0	0	0	0	0	0	0	0	0
OTU_1431	0	0	1	0	0	0	0	1	1	0	0	0	0	0	1	0	0	0	0	2	2	1	0	0	0	0	2	0	1	1	0	0	0	0	0	1	0	0	1	0	0	0	1	0	0	0	0	7	0
OTU_507	1	0	0	0	2	2	0	0	0	1	1	2	1	4	1	0	0	1	0	0	1	1	0	0	2	2	1	3	0	0	0	1	0	0	1	1	1	2	0	2	0	0	0	3	2	2	1	0	0
OTU_118	2	2	5	0	0	1	1	2	1	0	1	0	2	1	1	8	0	2	2	2	1	5	2	0	1	1	1	0	0	0	4	1	3	0	1	2	1	0	0	1	2	0	7	1	0	1	0	6	1
OTU_1970	3	0	0	1	0	0	0	0	0	0	0	0	0	0	0	0	0	0	0	0	0	0	0	0	0	0	0	0	0	0	0	0	0	0	0	0	0	0	0	1	0	0	0	0	0	0	0	0	0
OTU_714	0	1	1	1	0	1	0	0	1	4	0	0	1	2	1	0	0	0	0	0	0	0	0	0	0	0	2	0	0	1	0	3	0	0	0	0	1	0	0	2	0	0	0	2	0	0	0	0	0
OTU_2248	0	0	0	0	0	0	0	0	0	0	0	0	0	0	0	1	0	0	0	0	0	0	0	0	1	0	0	0	0	0	0	0	0	1	0	0	0	1	0	0	1	0	0	0	0	0	0	0	0
OTU_1141	0	0	0	1	0	0	0	0	0	0	0	0	0	0	0	0	0	0	0	0	1	0	0	0	0	0	0	0	0	0	0	0	0	0	0	0	0	0	0	0	0	0	0	0	0	0	0	1	0
OTU_932	0	1	0	0	0	0	1	2	0	0	1	2	0	0	1	1	0	0	1	1	0	1	0	1	1	0	0	1	0	1	1	0	1	2	2	0	0	2	0	1	2	2	0	0	0	0	1	0	1
OTU_2321	0	0	0	0	0	0	0	0	0	0	0	0	0	0	0	0	0	0	0	0	0	0	0	0	0	0	0	0	0	0	0	0	0	0	0	0	0	0	0	0	0	0	0	0	0	0	0	1	0
OTU_1540	0	0	0	0	0	0	0	0	0	0	1	0	0	0	0	0	0	2	0	0	0	0	0	0	0	0	0	0	0	0	0	2	0	0	0	0	0	0	0	0	0	0	0	0	0	0	0	0	0
OTU_1896	0	0	0	0	0	0	0	0	1	0	0	0	0	0	0	0	0	0	0	0	0	0	0	0	0	0	0	0	0	0	0	0	0	0	0	0	0	0	0	0	0	0	0	0	0	0	0	0	0
OTU_964	0	0	0	0	0	0	1	0	0	0	0	0	0	0	1	0	0	0	0	0	0	0	0	0	0	0	0	0	0	0	0	1	1	0	0	0	1	0	0	1	0	0	0	0	0	0	0	0	0
OTU_737	0	1	0	0	0	1	0	0	0	2	0	3	0	0	0	0	0	0	0	0	0	0	0	1	0	1	0	0	0	0	0	0	0	0	0	0	0	1	0	0	0	0	0	1	1	0	0	0	0
OTU_1856	1	0	1	0	0	2	3	0	0	0	2	0	1	0	1	0	0	0	0	0	0	0	0	1	0	0	0	0	0	0	0	1	0	1	0	0	0	0	1	1	1	2	0	0	0	0	0	0	0
OTU_1654	0	0	0	0	0	0	0	0	0	0	0	2	0	0	0	0	0	0	0	0	0	0	0	1	0	0	0	0	0	0	0	0	0	0	0	0	0	0	0	0	0	0	0	0	0	0	0	0	0
OTU_48	0	3	3	3	2	3	0	0	1	5	2	9	0	0	1	0	3	3	3	6	1	1	1	3	1	6	10	8	8	0	1	0	8	0	1	0	4	1	0	3	1	0	1	3	3	2	1	0	4
OTU_849	0	0	0	0	0	0	0	0	0	0	0	0	0	0	0	0	0	0	0	0	0	0	0	0	0	0	0	0	0	0	0	0	0	0	0	0	0	0	0	1	0	0	8	0	0	0	0	0	0
OTU_2079	0	0	0	0	0	0	0	0	1	0	1	1	0	1	0	0	0	0	0	0	0	0	0	0	0	1	0	0	0	0	0	0	0	1	0	0	0	0	0	0	0	0	0	0	1	0	0	0	0
OTU_1683	0	0	0	0	0	0	0	0	0	0	0	1	0	0	0	0	0	0	0	0	0	0	0	0	0	0	0	0	0	0	0	0	0	0	0	0	0	0	0	0	0	0	0	0	1	0	0	0	0
OTU_531	0	1	2	0	0	0	0	0	0	0	0	2	1	2	1	1	1	3	1	0	1	0	0	1	1	0	1	0	1	1	0	0	0	2	0	1	1	2	2	0	0	2	2	1	0	0	0	1	0
OTU_662	0	0	1	0	0	0	0	0	0	0	0	0	0	1	0	1	0	0	0	0	1	0	0	0	0	0	0	1	0	0	0	0	0	0	3	0	1	0	0	0	0	0	1	0	0	0	0	0	1
OTU_541	0	0	0	0	0	1	0	0	0	1	0	0	0	1	0	0	0	0	0	0	0	0	0	0	0	0	1	0	1	0	0	0	0	3	0	0	0	0	0	0	1	0	0	0	0	0	2	0	0
OTU_2309	0	0	0	0	0	0	1	0	0	0	0	0	0	0	0	0	0	1	0	0	0	0	0	0	0	1	0	0	0	0	0	0	0	0	0	0	0	0	0	0	0	0	0	0	0	0	0	0	0
OTU_582	0	0	1	0	0	0	0	0	1	0	0	2	1	1	0	1	1	0	0	1	0	1	0	0	0	0	1	0	0	0	0	1	0	0	0	0	0	0	1	0	1	0	0	0	1	0	0	0	1
OTU_564	0	1	2	0	0	0	0	0	0	0	1	0	2	0	0	1	0	0	0	0	2	2	0	0	0	0	0	0	0	0	0	0	0	0	2	1	0	0	1	1	1	0	0	0	0	0	0	3	0
OTU_230	1	2	0	3	0	1	1	1	3	0	1	1	0	1	0	0	1	0	0	0	0	0	0	0	1	0	0	4	2	0	0	0	0	3	2	0	0	0	2	1	0	0	0	0	0	0	0	0	0
OTU_612	0	0	0	1	0	0	0	1	0	0	0	1	0	0	0	0	0	0	0	0	1	0	0	0	0	0	0	1	0	0	0	0	0	0	0	0	0	0	0	0	0	0	0	0	0	0	0	0	0
OTU_216	0	3	1	0	1	2	1	0	3	1	3	1	1	1	3	2	3	0	1	1	2	0	1	3	2	4	1	0	1	1	0	2	0	0	2	1	3	1	2	0	1	1	1	1	1	3	1	1	2
OTU_53	0	6	2	1	1	0	0	1	4	0	1	3	3	4	0	3	2	0	5	1	0	0	0	0	3	1	1	1	6	1	3	0	3	0	2	2	3	0	12	3	5	0	0	0	1	0	1	2	4
OTU_497	0	1	0	0	0	0	0	0	0	0	5	0	0	1	0	0	0	0	0	0	1	1	0	0	0	0	1	0	0	4	1	0	1	0	0	0	0	0	0	0	1	0	0	0	0	0	0	0	0
OTU_2444	0	0	0	0	1	1	0	0	0	0	0	2	0	0	1	0	0	0	0	0	0	0	0	0	0	0	0	0	0	0	0	0	0	0	0	0	0	0	0	1	0	1	0	1	0	0	0	0	0
OTU_2423	1	1	0	1	0	2	0	0	1	0	1	0	0	0	2	0	1	0	0	0	1	0	1	1	0	0	0	0	0	0	1	2	0	0	0	0	0	1	0	0	0	0	0	0	0	0	1	1	0
OTU_2201	0	0	0	0	0	0	0	0	0	0	0	0	0	0	0	0	0	0	0	0	1	0	0	0	0	0	0	0	0	0	0	0	2	0	0	0	0	0	0	0	1	0	0	0	0	0	0	1	1
OTU_2507	0	3	0	0	0	0	0	1	0	0	0	0	0	0	0	0	0	0	0	0	0	0	0	0	0	0	0	0	0	0	0	0	0	1	1	0	0	0	0	0	1	0	0	0	0	0	0	0	0
OTU_1452	0	0	0	0	0	0	0	0	0	0	0	0	0	2	0	0	0	1	1	0	0	0	0	0	0	2	0	0	0	0	1	1	0	0	0	0	0	0	0	0	0	0	0	0	0	0	0	0	0
OTU_1899	0	0	0	0	0	0	0	0	0	0	0	0	0	0	0	0	0	0	0	0	2	0	0	0	0	0	0	0	0	0	0	0	0	0	0	0	0	0	0	0	0	0	0	0	0	0	0	0	0
OTU_286	2	0	0	0	0	0	0	0	0	0	0	1	1	2	1	0	3	0	0	1	0	2	0	0	0	0	7	1	0	1	0	0	1	0	0	1	0	0	0	0	0	0	0	0	0	1	0	0	2
OTU_2189	0	0	0	0	0	0	0	0	0	0	0	0	0	0	0	1	0	0	1	0	0	1	0	0	0	0	0	0	0	0	0	0	0	0	0	0	0	0	0	0	0	0	0	0	0	0	0	0	0
OTU_1802	0	1	1	0	1	0	0	0	1	0	0	0	0	0	0	0	0	1	0	0	0	0	1	0	0	0	1	0	0	0	0	0	0	0	1	0	0	0	0	0	0	0	0	0	0	0	0	2	0
OTU_1937	0	0	0	0	0	0	0	0	0	0	0	0	0	0	1	0	0	0	0	0	0	0	0	0	0	0	0	0	0	1	0	1	0	0	1	0	0	0	0	1	1	0	0	0	0	0	0	0	0
OTU_906	1	0	0	0	0	0	0	0	0	0	0	1	0	0	0	0	0	1	0	0	0	0	0	0	0	1	0	1	0	0	0	0	1	0	0	0	0	0	0	0	1	0	0	0	0	0	0	0	0
OTU_1113	0	0	0	1	0	1	0	0	0	0	0	1	0	2	0	0	0	0	0	0	0	0	0	0	0	0	0	0	0	0	0	0	0	0	0	0	0	0	0	0	0	0	0	0	0	0	0	0	0
OTU_870	0	0	0	0	0	0	0	0	0	0	0	0	0	2	0	0	2	0	0	0	0	0	0	0	2	0	0	0	0	0	0	0	0	0	1	0	0	0	0	0	0	0	0	0	0	1	0	0	0
OTU_191	1	0	0	2	1	2	1	0	0	1	1	5	1	0	2	1	3	1	2	2	0	1	1	2	1	0	0	0	2	2	2	3	4	1	1	1	0	0	2	1	3	6	3	1	0	0	0	0	0
OTU_834	0	1	0	0	0	2	0	0	0	0	0	0	0	0	0	0	0	0	0	0	0	0	0	0	0	0	0	0	0	0	0	0	1	1	0	0	0	0	0	0	0	0	0	0	0	0	0	1	0
OTU_297	1	0	0	0	2	1	2	1	0	1	0	5	0	0	0	0	2	1	0	0	1	0	1	2	0	1	0	0	1	1	1	1	0	0	0	1	0	1	2	0	2	0	2	2	0	0	1	4	0
OTU_202	1	1	0	0	1	2	2	0	1	0	2	1	1	0	0	0	0	0	2	0	0	0	4	0	0	1	0	0	0	1	0	1	0	0	0	0	0	0	1	1	1	0	0	1	2	0	0	4	0
OTU_575	0	1	0	0	0	0	0	0	0	0	1	1	0	0	1	0	1	0	0	0	2	0	0	0	0	1	0	0	0	0	0	0	1	0	0	0	0	0	0	0	0	0	0	0	0	0	0	0	0
OTU_675	0	0	0	0	0	0	0	1	1	0	0	0	0	0	1	0	0	0	0	0	1	0	1	0	0	0	1	0	0	0	0	0	1	1	0	1	0	0	0	0	1	0	0	0	0	0	0	0	0
OTU_876	0	0	1	0	2	0	0	0	0	0	0	2	0	1	0	0	0	1	0	0	0	0	0	0	0	0	2	0	0	0	1	0	1	0	0	0	0	0	0	0	0	0	0	0	0	0	0	0	0
OTU_1066	0	1	1	1	0	0	0	0	0	0	0	0	3	1	0	0	1	0	1	0	1	2	2	1	0	1	1	0	2	0	0	0	0	1	1	0	1	0	1	0	1	0	0	0	0	0	0	0	1
OTU_740	0	0	1	0	0	0	0	0	0	0	0	1	0	0	0	2	0	0	0	0	0	0	0	0	0	0	0	0	0	0	0	1	0	0	0	0	0	0	0	0	0	0	1	0	0	0	0	0	0
OTU_513	0	0	1	1	0	0	0	0	1	0	1	0	0	0	0	1	0	0	1	0	0	1	0	0	0	0	0	1	0	0	0	0	0	0	0	0	0	0	0	2	0	0	0	0	0	1	1	0	0
OTU_433	1	2	1	2	0	3	1	1	0	1	2	1	1	0	1	0	0	1	0	4	0	0	1	0	1	1	2	0	2	0	1	0	0	1	1	0	2	2	1	1	0	0	0	1	0	1	1	0	3
OTU_1238	1	0	0	0	0	0	0	0	0	1	0	1	0	2	1	0	0	0	1	2	0	0	0	1	1	0	0	0	0	0	1	1	1	0	1	0	1	0	0	0	0	1	0	0	0	0	0	1	0
OTU_650	0	0	3	0	0	0	0	0	0	0	0	0	4	0	0	3	0	0	0	2	0	2	1	0	0	0	1	0	0	0	0	0	0	0	1	0	0	0	0	0	0	0	0	0	0	0	0	3	3
OTU_330	0	1	0	0	0	0	1	0	0	0	0	0	1	0	0	0	2	0	1	1	0	0	1	1	0	1	1	0	1	0	2	4	0	1	2	0	0	0	0	2	0	1	0	0	0	0	3	1	1
OTU_2263	0	0	1	0	1	0	0	0	0	0	0	0	0	0	0	2	0	1	0	0	1	0	0	0	0	0	0	1	0	1	0	1	0	0	0	1	1	0	0	0	0	0	0	0	0	0	0	0	0
OTU_360	2	1	2	1	1	2	0	0	1	1	1	0	1	1	2	4	2	1	1	0	0	0	0	2	1	1	1	2	1	0	1	0	1	0	2	0	4	1	0	1	1	1	4	0	0	0	1	0	3
OTU_401	1	2	0	2	0	1	3	3	1	2	2	1	4	2	1	2	5	1	1	2	3	2	1	1	0	1	5	0	1	2	3	2	3	0	1	3	0	0	2	1	4	2	3	0	1	5	1	5	0
OTU_568	2	0	0	0	0	0	1	0	0	0	0	1	0	0	0	0	0	0	0	0	0	0	0	0	0	0	2	1	0	0	0	0	0	0	0	0	0	0	0	0	0	0	0	0	1	0	0	0	0
OTU_1375	5	0	3	0	1	1	1	2	1	2	1	0	1	8	2	1	2	3	2	0	1	2	2	4	1	1	0	2	1	3	0	1	0	6	2	1	0	1	0	3	2	3	0	0	0	2	1	2	2
OTU_259	2	1	1	2	4	0	1	3	0	5	1	4	1	0	0	0	0	1	0	0	0	0	1	0	0	10	0	0	4	0	0	0	1	0	1	2	1	2	3	0	1	0	0	1	4	2	4	0	0
OTU_345	0	0	0	0	0	0	0	0	0	1	0	0	0	1	0	0	0	2	0	1	0	0	1	0	0	0	0	0	1	2	0	0	0	0	0	1	0	1	1	0	0	0	0	0	1	0	1	0	0
OTU_1942	0	0	0	1	2	0	0	0	0	0	0	1	0	0	0	0	0	0	0	0	0	1	0	0	0	0	0	0	0	0	0	0	0	0	0	0	1	0	1	0	0	0	0	0	0	0	1	0	0
OTU_370	0	0	1	0	0	0	0	0	0	0	0	0	0	0	0	1	2	0	0	3	0	0	0	0	1	0	3	0	2	0	1	1	2	1	0	0	1	1	3	0	1	1	0	0	0	0	0	2	0
OTU_934	0	3	1	0	0	0	1	0	0	0	1	1	0	2	0	0	0	1	1	0	0	0	0	0	0	1	0	1	1	0	0	0	2	0	1	0	0	1	0	0	0	0	1	2	1	0	0	1	0
OTU_850	0	0	1	1	0	2	0	0	0	0	0	1	0	0	0	0	1	0	0	0	0	0	0	0	0	2	0	1	0	0	0	0	0	0	0	1	0	0	0	0	0	0	0	0	0	1	0	0	0
OTU_998	2	2	0	0	0	0	1	3	0	0	0	0	0	0	0	0	1	0	0	0	0	0	0	2	0	2	0	0	0	0	0	0	0	0	0	0	0	1	1	0	1	0	0	1	0	0	1	0	0
OTU_927	0	0	0	0	1	0	0	0	0	0	2	1	0	0	0	0	0	1	0	1	1	0	1	0	2	0	0	0	1	0	0	0	1	0	0	0	0	0	0	0	1	0	2	0	0	2	2	1	0
OTU_670	0	1	0	1	0	1	3	0	0	2	0	0	0	1	0	0	0	0	0	0	0	0	2	0	0	3	0	0	0	2	0	3	0	1	0	4	0	1	0	0	1	2	0	1	1	0	2	0	0
OTU_693	0	2	0	0	0	0	0	0	0	2	0	0	0	1	0	0	0	0	0	0	0	1	0	0	1	0	1	1	0	1	0	0	1	0	0	0	0	0	0	0	1	0	0	0	0	0	0	0	1
OTU_903	0	0	0	0	0	0	0	0	0	0	0	0	1	0	0	1	0	0	0	0	0	0	0	0	0	0	0	0	0	0	0	0	0	0	0	0	0	0	0	6	0	0	0	0	0	0	0	1	0
OTU_2441	2	0	0	0	0	0	0	0	0	0	1	0	1	0	0	0	0	0	0	0	0	0	0	0	0	1	0	0	2	0	1	1	1	1	0	0	0	0	0	1	0	0	0	0	1	2	0	0	0
OTU_627	1	0	0	1	2	1	0	3	1	1	1	2	3	2	0	1	1	1	0	2	0	0	3	0	0	0	1	0	2	0	0	0	1	3	1	0	0	0	3	1	1	0	1	5	6	1	0	1	0
OTU_1245	0	2	1	0	0	0	0	2	0	1	2	0	0	0	0	0	1	0	0	0	0	0	3	0	0	2	0	0	0	2	0	0	0	0	0	0	0	1	0	0	2	0	1	0	0	1	0	0	0
OTU_1987	0	0	0	0	0	0	0	0	0	0	0	0	1	0	0	0	0	0	0	0	0	0	0	0	0	0	0	0	0	0	1	0	0	1	0	0	1	0	1	0	1	0	0	0	1	0	0	0	0
OTU_2281	0	0	0	0	0	0	0	0	0	0	0	2	0	0	0	0	0	0	0	0	0	0	0	0	0	0	0	0	0	0	0	0	0	0	0	0	0	0	0	0	0	0	0	0	0	0	0	0	0
OTU_1863	0	0	0	0	0	0	0	0	0	0	0	0	1	0	0	0	0	0	0	0	0	0	0	0	0	0	0	0	0	0	1	0	0	0	0	0	0	0	0	0	0	0	0	0	0	0	0	0	0
OTU_828	2	0	0	1	0	1	0	0	0	0	0	1	1	0	2	0	0	1	0	0	0	0	0	0	1	2	0	1	0	0	0	0	0	1	0	0	1	0	0	1	0	0	0	0	2	0	1	0	0
OTU_285	0	1	0	0	0	0	0	0	0	1	0	0	1	1	2	0	1	0	4	0	1	0	4	3	2	1	0	3	3	1	1	4	1	3	0	0	5	1	0	0	2	4	1	3	3	1	2	0	0
OTU_459	0	1	0	0	0	0	3	0	0	0	1	2	0	0	0	1	0	0	1	1	0	1	4	1	0	2	0	0	0	2	0	1	0	0	0	1	0	0	0	1	3	3	0	0	0	1	1	0	1
OTU_489	1	1	0	0	0	0	0	1	1	0	0	0	3	0	1	1	1	0	0	0	0	0	0	0	1	0	2	0	0	0	0	0	0	0	2	1	0	0	0	1	0	0	3	1	0	1	0	2	0
OTU_1632	1	0	0	0	0	1	0	0	0	0	0	0	0	0	0	0	0	0	0	0	0	0	1	1	0	0	0	0	0	0	0	0	0	0	0	0	0	0	0	0	0	0	0	0	0	0	1	0	0
OTU_2454	0	0	0	0	0	0	0	0	0	0	0	0	0	0	0	0	0	0	0	0	0	0	0	0	0	0	0	0	0	0	0	0	0	0	0	0	0	0	0	0	0	0	0	0	0	0	0	0	0
OTU_144	0	0	1	4	2	3	0	0	1	2	2	1	1	1	2	0	1	1	1	0	0	0	1	2	0	2	1	5	0	0	1	0	0	3	1	0	3	0	0	1	0	1	0	0	1	2	2	1	0
OTU_1261	0	0	0	0	0	2	0	0	1	0	0	0	0	0	0	0	1	0	0	0	0	0	1	0	0	3	0	0	1	1	1	0	0	0	0	1	0	0	0	0	0	0	0	1	0	1	0	0	0
OTU_1602	0	0	0	1	0	1	0	0	0	0	1	0	0	0	0	0	0	0	0	0	0	0	0	2	0	0	0	0	1	0	0	0	0	0	0	0	0	0	0	0	0	3	0	1	0	0	1	0	0
OTU_176	0	3	3	1	2	1	0	1	1	0	1	1	6	0	3	1	0	0	8	1	2	1	1	1	0	0	1	1	0	0	0	1	2	3	1	1	6	0	0	0	0	1	2	1	1	2	0	1	3
OTU_214	0	1	3	4	2	10	3	0	1	0	4	3	0	1	3	0	2	1	5	2	2	1	1	1	1	1	2	0	0	0	2	3	0	2	0	1	2	0	3	2	1	1	0	0	0	0	0	1	1
OTU_1119	0	0	0	0	0	0	0	0	0	0	0	2	0	0	0	0	0	0	0	0	0	0	0	1	0	0	0	0	0	0	0	0	0	0	0	0	0	0	0	0	0	0	0	0	0	0	1	0	0
OTU_476	0	0	0	0	0	0	2	1	0	0	0	2	1	0	1	1	0	0	0	0	0	0	0	0	0	1	0	0	0	0	0	1	0	0	1	0	0	2	1	0	2	0	0	1	1	1	0	1	0
OTU_926	0	0	0	0	0	0	0	0	1	0	0	0	0	0	0	0	0	0	0	0	0	0	1	0	0	0	0	0	0	0	0	0	0	0	0	0	0	0	0	0	0	0	0	1	0	0	0	0	1
OTU_1333	0	0	0	0	0	0	0	1	0	0	0	0	1	0	0	0	0	0	0	0	0	0	0	0	0	1	0	0	0	0	0	0	0	0	0	0	0	0	0	0	1	0	0	0	0	0	0	0	0
OTU_832	0	0	0	0	1	0	0	3	0	0	0	0	0	0	0	0	0	0	0	0	0	1	0	0	0	0	0	0	0	0	0	0	0	0	0	1	0	0	0	0	2	0	0	0	0	0	0	0	0
OTU_1135	1	0	0	1	0	0	0	0	0	0	0	0	0	0	1	1	0	0	1	0	0	0	0	0	0	0	0	0	0	1	1	0	0	0	0	0	2	0	1	1	0	0	0	0	0	0	0	0	1
OTU_539	3	1	0	0	1	3	4	0	1	1	2	0	0	0	2	0	0	0	0	1	5	0	2	0	4	1	0	1	0	0	0	1	0	0	2	0	1	1	0	2	0	0	1	0	0	5	1	0	1
OTU_2331	1	1	0	0	0	0	0	0	0	0	0	1	0	0	0	0	1	0	0	1	0	0	0	0	0	0	0	0	1	1	0	0	0	1	0	0	1	0	1	0	0	0	0	2	1	0	0	0	0
OTU_1027	0	0	0	0	0	0	0	0	0	0	0	2	1	0	0	0	2	0	1	1	0	0	0	0	0	0	0	0	0	1	0	0	0	0	0	0	0	2	0	0	0	0	0	0	0	1	0	0	0
OTU_1296	1	0	0	0	0	1	1	0	1	0	0	0	0	0	0	0	0	0	0	0	1	1	1	2	0	0	0	0	0	0	0	2	0	0	0	0	0	0	0	0	0	1	0	0	0	0	1	0	0
OTU_840	0	0	0	0	0	0	0	1	1	0	0	0	1	0	0	1	1	0	0	1	2	0	0	0	0	0	0	0	0	0	0	0	0	0	1	0	0	0	2	0	0	0	0	0	0	0	0	0	1
OTU_579	3	0	1	1	3	2	0	0	0	0	0	1	0	0	0	0	0	0	1	0	0	0	0	0	1	1	0	1	1	0	0	0	0	0	1	0	0	0	0	0	0	0	0	0	0	0	0	0	0
OTU_209	0	0	2	1	2	3	0	1	0	0	0	0	0	0	1	0	0	0	1	0	0	0	1	1	1	1	0	1	1	4	0	1	0	0	0	0	0	1	0	1	1	0	1	0	2	0	1	1	0
OTU_1664	0	1	0	0	0	0	1	0	0	0	0	0	1	1	0	1	0	0	0	0	0	0	1	0	0	0	0	1	0	1	0	0	0	0	0	0	0	0	0	0	1	0	0	0	1	0	0	0	0
OTU_1900	0	0	0	0	0	0	0	0	0	0	0	0	0	0	0	0	0	0	0	0	0	0	0	0	0	0	0	0	0	0	0	0	0	0	0	0	0	0	0	0	0	0	0	0	0	0	0	0	0
OTU_1295	0	0	0	0	0	0	0	0	0	0	0	0	0	0	0	0	1	0	1	0	0	0	0	0	0	1	0	0	0	0	0	0	0	0	0	0	1	0	1	0	0	0	0	0	0	0	0	1	0
OTU_2219	0	0	0	1	1	0	0	0	1	0	1	0	0	0	0	4	0	1	0	1	2	2	0	0	0	0	0	0	3	0	0	1	2	0	4	0	1	0	0	1	0	0	1	0	1	0	0	1	2
OTU_452	0	1	0	0	2	0	1	0	0	0	0	1	0	1	3	0	0	0	1	0	1	1	0	2	0	0	0	0	0	0	0	0	0	0	0	3	0	0	0	0	0	4	0	1	0	0	0	0	0
OTU_2436	0	0	0	0	0	0	0	0	0	0	0	0	0	0	0	0	0	0	0	0	0	0	0	0	0	1	0	0	0	0	0	0	0	0	0	1	0	1	0	0	0	0	0	0	0	0	0	0	0
OTU_555	0	1	0	0	0	1	0	0	1	3	1	0	1	1	0	0	1	1	0	1	0	1	0	5	0	1	0	0	0	1	0	4	1	0	1	0	0	1	0	0	0	1	0	0	0	0	1	1	0
OTU_1406	0	0	0	0	0	1	0	0	0	0	0	0	0	1	0	0	3	0	0	0	0	0	0	0	0	2	0	0	0	0	0	0	0	1	0	0	0	0	0	0	0	0	0	0	0	0	0	0	0
OTU_1617	1	3	2	0	2	0	0	1	1	0	1	0	2	2	1	1	2	0	3	6	1	2	1	0	0	0	3	1	2	1	2	0	1	0	2	0	1	1	3	4	0	1	1	0	1	1	1	5	2
OTU_1243	0	0	1	0	0	0	0	0	0	0	0	0	0	0	0	1	1	0	0	0	0	0	0	0	0	0	0	1	0	0	0	0	0	0	0	0	0	1	0	0	0	0	0	1	2	0	0	0	0
OTU_404	0	0	2	0	1	0	0	0	0	0	0	0	2	0	5	2	0	0	3	4	2	1	3	0	0	0	0	0	2	0	1	0	0	0	4	0	0	0	0	1	0	0	1	0	0	0	0	0	1
OTU_703	0	0	0	0	0	0	0	1	0	0	0	0	0	1	7	0	1	0	1	0	0	1	0	0	0	0	0	0	0	0	1	0	0	1	0	0	0	0	0	1	1	0	0	0	0	0	0	0	0
OTU_1208	0	0	0	0	0	0	0	0	0	0	0	2	0	0	1	0	0	1	0	0	0	0	0	0	0	0	0	0	0	0	0	0	0	0	0	1	0	0	0	0	1	1	0	0	1	0	0	0	0
OTU_2557	3	0	2	0	0	2	0	1	0	0	0	0	0	0	0	0	0	0	0	0	0	0	0	0	0	0	0	0	0	0	0	0	0	0	0	0	1	0	0	1	0	0	1	0	0	1	0	0	0
OTU_380	1	0	1	0	1	3	6	0	0	0	1	0	1	0	0	0	1	0	2	1	0	0	1	1	2	0	1	0	0	0	0	1	0	1	1	2	1	1	0	1	0	0	2	0	4	3	2	2	0
OTU_884	0	0	1	0	1	0	0	1	2	0	0	0	0	0	0	0	0	0	0	0	0	0	0	0	0	0	1	0	0	1	0	0	0	0	0	0	0	0	1	0	0	0	0	1	0	0	0	0	0
OTU_565	0	0	0	0	0	0	0	0	0	1	0	0	0	1	1	0	0	1	0	1	0	1	0	0	0	0	0	2	0	1	0	0	0	0	0	1	3	0	0	0	0	0	2	0	0	0	0	1	0
OTU_310	1	1	0	2	1	6	0	2	0	0	1	3	1	1	2	1	0	0	1	1	0	1	0	1	2	4	0	1	1	0	0	0	0	0	1	0	1	2	0	1	2	0	1	5	1	0	0	0	0
OTU_762	0	0	1	0	0	0	0	0	2	0	0	1	0	0	0	1	0	0	3	0	1	0	2	1	0	0	1	0	0	0	1	0	0	0	0	0	2	1	0	1	0	1	0	0	0	1	1	0	0
OTU_1048	0	0	0	0	0	0	0	0	0	0	0	0	0	0	0	0	0	0	0	0	0	0	0	0	0	0	0	0	0	0	0	0	0	0	0	0	0	0	0	0	1	1	0	5	0	0	0	0	0
OTU_371	1	2	1	2	1	7	0	2	1	1	4	1	0	0	3	0	1	2	4	3	0	1	5	6	2	3	4	0	1	1	2	3	1	2	0	1	4	2	0	4	1	7	1	6	2	1	0	1	2
OTU_1722	0	1	0	0	0	0	0	0	0	0	0	0	0	0	1	0	0	0	0	0	0	0	0	0	0	0	0	0	0	0	0	0	0	0	0	0	0	0	0	0	0	0	1	0	0	0	0	0	1
OTU_1209	0	1	0	0	1	1	1	0	0	0	1	1	0	0	0	0	0	1	0	1	1	0	1	0	0	0	1	0	0	1	0	0	0	1	0	0	1	0	0	0	0	0	0	0	0	0	0	0	0
OTU_2057	0	1	0	0	0	0	0	0	0	0	0	0	0	0	0	0	0	0	0	1	0	0	2	1	0	0	0	0	0	0	0	2	0	0	0	0	1	1	0	1	0	0	0	0	0	0	0	0	1
OTU_1236	0	0	0	0	1	0	1	1	0	0	0	1	2	1	0	0	0	1	1	1	0	0	0	1	0	0	1	0	0	0	0	1	0	0	1	0	0	0	1	0	0	1	1	0	0	1	0	0	0
OTU_393	0	2	1	1	0	1	0	2	1	0	0	0	0	0	2	0	1	2	6	0	1	1	0	0	0	1	1	0	0	3	0	0	0	0	0	0	2	1	2	3	0	0	0	0	0	0	0	1	0
OTU_314	0	2	2	2	1	0	1	1	4	3	0	0	0	1	3	6	1	1	2	0	0	0	2	0	2	2	0	3	1	2	0	1	0	0	1	0	1	2	1	3	0	1	1	0	0	1	0	0	0
OTU_624	1	0	1	1	0	1	0	0	0	0	0	1	0	2	1	0	0	0	0	0	0	0	2	1	3	0	0	0	0	0	0	0	0	0	0	0	0	0	0	0	0	1	0	0	0	0	0	1	2
OTU_183	3	0	1	0	2	0	0	3	1	3	2	2	2	0	1	1	2	5	4	1	0	1	1	3	0	0	2	2	2	1	0	0	4	1	4	0	0	1	1	1	4	4	0	0	0	0	1	1	1
OTU_519	1	1	0	0	0	1	1	0	0	0	0	4	2	0	0	0	1	1	0	1	0	0	2	2	0	0	0	0	2	0	1	0	2	0	0	1	0	0	0	0	1	0	0	2	0	1	2	0	0
OTU_265	2	1	0	6	1	3	5	0	4	1	1	3	0	2	0	0	2	1	0	0	1	0	0	1	2	0	1	1	0	0	1	0	0	0	1	0	2	3	0	1	0	1	0	4	3	4	1	1	3
OTU_466	0	1	1	1	1	1	1	0	0	2	0	2	0	2	2	1	0	0	2	1	0	0	1	1	0	0	0	0	0	0	1	0	0	0	0	2	0	2	0	1	2	0	0	1	1	0	1	0	1
OTU_220	0	0	0	2	0	1	0	0	0	0	2	0	0	1	0	0	2	2	0	0	0	0	0	0	3	2	0	0	0	2	0	0	0	7	1	1	0	2	0	2	1	2	2	3	1	2	0	0	0
OTU_2483	0	0	0	0	0	0	0	0	0	0	0	0	0	0	0	0	0	0	0	0	0	0	0	0	0	0	0	0	0	0	0	1	0	0	1	0	0	0	1	0	0	0	0	0	0	0	0	0	0
OTU_2505	0	0	0	0	0	0	0	0	0	1	0	0	0	0	0	0	0	0	0	0	0	0	0	0	1	0	0	0	0	0	0	0	0	0	0	0	0	0	0	0	0	0	0	1	0	0	0	0	0
OTU_213	0	0	0	6	1	0	0	0	0	0	0	2	0	0	0	0	1	0	0	0	0	0	1	1	2	2	1	0	0	0	0	0	1	0	1	1	2	0	3	0	0	0	0	0	1	1	1	1	0
OTU_1139	2	2	1	1	0	1	1	0	0	0	2	2	3	1	0	0	0	1	0	0	1	0	1	3	0	0	0	5	0	0	1	2	2	0	0	1	1	0	0	0	0	2	1	1	1	0	1	1	0
OTU_1892	0	0	1	0	0	0	0	0	0	0	0	0	0	0	0	0	0	0	0	0	0	0	0	0	0	0	3	0	0	0	0	0	0	0	0	0	0	0	0	0	0	0	1	0	0	0	0	0	0
OTU_925	1	0	0	0	0	0	0	0	0	0	0	1	0	0	0	0	0	0	0	0	0	0	0	0	0	0	0	0	0	0	0	2	0	0	0	0	0	0	1	0	0	0	0	2	0	0	0	0	0
OTU_823	1	0	0	0	1	0	0	0	0	0	1	0	0	0	0	0	0	0	1	0	0	0	2	0	0	0	0	1	0	0	0	0	0	0	0	1	1	0	0	0	0	0	0	0	0	0	0	0	0
OTU_988	0	0	0	0	0	0	0	1	0	0	0	0	0	0	0	0	0	0	0	0	0	0	0	0	0	0	0	0	0	1	0	1	0	0	0	0	0	0	0	0	0	0	0	0	0	0	0	0	0
OTU_656	0	0	0	0	2	0	0	0	0	0	2	1	0	0	0	0	0	1	0	0	0	0	0	2	0	1	0	0	0	0	0	0	0	0	0	0	0	0	0	0	0	0	0	0	0	0	1	0	0
OTU_179	1	3	1	2	1	0	2	1	3	2	4	0	0	5	1	1	1	0	1	1	2	1	0	5	3	1	2	0	6	0	2	2	0	2	1	3	3	1	2	2	1	0	1	1	3	2	1	1	1
OTU_2332	0	1	0	0	0	0	0	0	0	0	0	0	0	0	0	0	0	0	1	0	0	1	0	0	0	0	0	0	0	0	0	0	0	0	0	0	0	0	0	0	0	0	0	0	0	0	0	0	0
OTU_1587	0	0	0	0	0	0	0	0	0	0	0	0	1	0	0	0	0	1	0	0	0	0	0	0	0	0	0	0	0	0	0	0	0	0	0	0	0	0	2	0	1	0	0	0	0	1	1	0	0
OTU_2491	0	0	0	0	0	0	0	0	0	0	0	0	0	0	0	0	0	0	0	0	0	0	0	0	0	0	0	0	0	0	0	0	0	0	0	0	0	0	0	0	0	0	0	0	0	0	0	0	0
OTU_578	3	0	0	0	0	0	0	0	0	1	0	0	0	0	0	1	0	0	0	0	0	0	0	0	1	1	0	0	0	0	0	0	0	0	0	0	0	1	0	0	0	0	0	0	0	1	0	0	0
OTU_416	1	2	1	0	1	0	2	0	0	1	1	0	0	0	0	1	0	0	0	1	1	0	0	0	0	0	0	2	2	0	0	0	0	0	0	0	0	1	0	0	1	0	0	0	0	0	0	0	0
OTU_1813	0	0	0	0	0	0	0	0	0	0	1	0	0	0	0	0	0	0	0	0	0	0	0	0	1	1	0	0	0	0	0	0	0	0	0	0	0	0	0	0	0	0	0	0	0	1	0	0	0
OTU_470	0	1	0	1	0	0	0	0	1	0	2	0	0	0	2	2	0	0	1	0	0	4	0	1	0	3	0	0	0	0	0	2	0	0	1	0	0	0	0	1	1	0	0	1	0	0	0	1	4
OTU_999	0	0	1	0	0	0	0	1	0	0	0	2	1	0	0	0	0	0	0	0	0	0	0	0	2	0	0	0	0	0	0	0	1	0	2	0	0	0	0	1	1	0	0	0	0	0	0	0	0
OTU_317	0	0	2	1	4	1	4	0	0	1	3	1	0	2	2	2	2	1	0	0	1	0	4	0	2	3	0	1	1	2	2	2	0	6	1	0	3	4	0	3	0	2	1	0	3	2	2	0	1
OTU_1202	0	0	0	0	0	0	0	0	0	0	0	0	0	0	0	0	0	0	0	0	0	0	0	0	1	0	0	0	0	0	0	0	0	0	0	0	0	0	1	0	0	0	0	0	0	0	1	0	0
OTU_1104	0	1	1	0	0	0	0	0	0	0	0	0	0	0	0	1	0	0	0	0	0	0	0	0	1	0	0	0	1	1	1	1	1	0	0	2	1	0	0	0	0	0	0	1	0	0	0	0	0
OTU_429	0	1	7	5	0	0	0	0	0	8	0	1	0	0	0	0	0	0	3	0	0	0	1	0	0	0	0	1	0	0	0	0	0	0	0	0	0	0	0	0	0	0	0	0	0	0	0	0	1
OTU_1430	0	2	0	0	0	0	0	0	0	0	0	0	0	1	0	0	0	0	0	0	0	0	0	0	0	0	0	0	0	0	0	0	1	0	0	0	0	0	0	1	0	0	0	0	0	0	0	0	0
OTU_2197	0	0	0	0	0	0	0	0	0	0	0	0	0	1	0	0	0	0	0	0	0	0	0	2	0	0	1	0	0	0	1	1	0	0	0	0	1	0	0	0	0	0	0	0	0	0	0	0	0
OTU_505	0	0	1	1	0	0	0	0	3	0	0	0	1	1	1	1	0	0	0	0	0	0	0	2	0	0	0	0	1	0	0	0	0	0	0	0	1	1	0	0	0	0	1	0	0	0	0	0	0
OTU_534	1	2	1	1	1	0	0	0	0	1	1	0	0	1	2	0	0	2	0	1	1	0	0	3	1	1	0	2	1	1	0	0	0	0	0	0	1	0	0	1	0	0	0	0	0	3	0	2	1
OTU_207	4	2	0	0	3	1	0	0	1	1	3	1	1	2	1	0	2	0	1	0	1	2	0	1	0	1	4	0	0	0	1	5	1	0	0	0	1	0	2	0	1	0	0	0	3	0	2	0	1
OTU_424	0	3	1	3	1	1	0	4	0	1	1	2	0	1	1	0	0	0	0	0	0	0	4	1	1	0	1	1	1	2	3	3	0	0	2	0	0	1	0	0	5	0	0	1	0	1	14	0	4
OTU_674	0	0	0	0	0	0	0	0	0	0	0	0	0	0	1	2	0	1	0	0	0	1	1	0	0	0	0	0	0	0	0	0	0	0	0	1	1	0	1	0	0	0	0	0	1	0	0	0	0
OTU_1723	0	0	0	0	0	0	0	0	0	0	0	0	0	0	0	0	0	0	0	0	0	0	0	0	0	0	0	0	0	0	0	0	1	0	0	0	0	0	0	0	0	0	0	0	0	0	0	0	0
OTU_1953	0	0	0	0	0	0	0	0	0	1	0	1	0	0	0	0	0	2	0	0	1	0	0	0	0	0	0	0	1	0	0	2	0	0	1	1	0	1	0	0	0	0	0	1	1	0	2	0	0
OTU_463	3	0	1	1	4	0	0	0	0	2	1	1	4	0	0	0	0	2	1	0	0	0	1	1	2	2	0	1	0	1	0	0	0	0	0	0	0	0	0	0	1	3	2	0	0	1	2	0	1
OTU_1270	0	0	0	0	0	0	0	0	1	0	0	0	0	0	0	0	1	0	0	0	0	0	0	0	0	0	0	0	0	0	0	1	1	0	0	0	0	0	1	0	0	0	0	0	0	0	0	0	1
OTU_2085	0	0	0	0	0	0	1	0	0	0	0	0	0	0	0	0	0	0	0	0	0	0	0	0	0	1	0	0	0	0	0	0	0	0	0	0	0	0	1	1	0	0	0	0	0	0	0	0	0
OTU_2540	0	0	0	1	0	0	0	0	0	0	0	0	0	0	0	0	0	1	0	0	0	0	0	0	0	0	0	0	0	0	2	0	0	1	0	0	0	0	0	0	0	1	0	0	0	1	0	0	0
OTU_442	1	0	1	0	2	1	0	0	0	1	0	0	0	0	0	1	1	0	0	0	0	0	0	0	0	2	0	0	0	0	0	1	0	1	0	0	0	0	0	0	0	0	0	0	0	2	0	0	1
OTU_889	0	1	0	0	0	0	0	0	0	0	0	0	0	0	0	0	0	0	0	0	0	0	0	2	0	0	0	0	0	0	0	0	0	0	0	0	0	0	0	0	0	0	0	0	0	0	0	0	0
OTU_378	0	0	0	1	0	0	2	1	0	0	1	0	0	0	0	1	0	1	2	0	0	0	1	1	0	2	0	2	2	0	0	0	0	3	0	0	0	0	0	1	0	0	0	1	1	0	0	0	0
OTU_1267	2	1	0	1	0	1	0	1	3	0	0	0	1	0	5	0	1	2	0	0	2	0	0	0	0	2	1	0	1	2	1	1	0	2	0	0	2	0	0	0	0	0	1	0	1	0	0	0	0
OTU_267	0	0	0	1	1	0	0	0	1	0	0	1	0	1	2	0	1	0	1	0	0	2	1	0	1	0	0	0	1	0	1	1	1	4	1	0	2	0	1	0	0	3	0	1	3	1	1	0	0
OTU_1056	0	0	0	0	0	0	0	1	0	0	0	1	2	2	0	0	1	1	0	0	1	0	0	0	0	0	0	0	0	2	0	2	2	1	0	1	0	0	2	0	0	0	0	0	0	1	0	0	0
OTU_933	0	0	0	1	0	0	1	0	0	0	0	0	0	0	0	0	0	0	0	0	0	0	0	0	0	0	0	1	1	0	0	0	0	0	0	0	0	0	0	0	0	0	0	1	0	0	0	0	0
OTU_1352	0	0	0	0	0	0	0	0	0	0	0	0	1	0	0	0	0	0	0	0	0	0	0	0	0	0	0	0	0	0	0	1	0	0	0	0	0	0	0	0	0	0	0	0	0	0	0	0	0
OTU_888	1	0	0	0	0	1	0	0	0	1	0	0	2	2	0	0	0	0	0	0	0	0	0	0	0	0	0	1	1	0	2	1	1	0	0	0	1	0	0	1	0	0	0	0	1	0	0	0	5
OTU_611	0	0	0	0	0	0	0	0	0	0	0	0	0	0	1	0	0	0	0	0	0	1	0	0	1	1	0	0	0	0	0	0	0	1	1	0	0	0	0	1	0	0	0	0	0	0	0	2	1
OTU_695	0	0	0	0	0	0	0	0	0	0	0	0	0	0	0	0	0	0	0	0	0	0	1	0	0	1	0	0	0	1	2	1	0	0	0	0	0	0	0	0	0	0	0	0	0	0	0	0	0
OTU_613	0	0	2	0	0	0	0	0	0	0	0	0	0	0	0	1	0	0	0	0	0	0	0	0	0	0	0	0	1	0	1	0	0	0	0	1	0	0	1	0	0	0	0	0	0	1	0	0	0
OTU_1045	0	0	0	0	5	0	0	1	1	0	0	0	0	0	1	2	0	0	1	0	0	0	0	1	0	1	1	0	0	0	0	1	0	1	0	0	1	0	0	0	0	2	0	0	0	0	0	0	1
OTU_413	0	0	0	0	0	0	0	0	0	0	0	0	0	1	0	0	0	0	0	2	0	16	0	0	0	0	1	0	0	0	0	0	3	1	1	0	0	0	0	0	1	0	1	0	0	0	0	1	1
OTU_586	0	1	2	0	0	0	0	1	0	0	0	0	0	1	0	0	1	0	0	0	0	1	0	0	1	0	2	1	0	0	0	0	0	1	0	0	0	0	0	0	0	0	0	0	0	0	0	1	0
OTU_659	0	0	0	0	0	0	0	0	0	0	0	0	0	1	2	2	0	0	0	0	0	0	0	0	0	0	0	0	0	0	0	1	0	0	0	0	0	0	0	1	0	0	1	0	0	0	0	0	0
OTU_1450	0	0	0	0	0	0	0	0	0	1	0	0	0	0	0	0	0	0	0	1	0	0	0	0	0	0	1	0	0	0	0	0	0	0	1	0	1	0	0	0	0	0	0	0	0	0	0	0	0
OTU_1142	0	1	0	2	0	2	0	2	0	0	0	1	0	0	1	1	0	0	0	0	0	0	0	0	3	0	0	0	0	1	0	1	0	0	0	0	2	0	0	0	0	0	0	0	0	0	0	0	0
OTU_2471	0	0	0	0	0	0	0	1	0	0	0	0	0	0	0	0	0	0	0	0	2	0	0	0	0	0	0	0	0	0	0	0	0	0	0	0	0	0	0	0	0	0	0	0	0	0	0	0	0
OTU_1301	0	0	0	0	1	0	0	0	0	0	0	0	0	0	0	0	0	0	0	0	0	0	0	0	0	0	0	0	0	0	0	0	0	1	0	0	0	0	0	0	0	1	0	0	0	0	0	0	1
OTU_802	0	1	1	1	0	1	0	0	0	5	1	1	1	0	0	0	1	2	0	0	1	0	0	1	0	0	0	1	0	0	0	1	2	0	0	1	0	1	0	0	0	0	0	1	1	0	0	1	0
OTU_1351	0	0	0	1	1	0	0	0	0	0	0	0	0	0	0	0	0	0	0	0	1	0	0	0	0	0	0	0	0	0	0	0	0	0	0	0	1	0	0	0	0	0	0	1	0	1	0	0	0
OTU_577	1	1	0	0	1	1	0	0	1	0	0	0	0	2	1	0	0	1	0	0	0	0	0	0	1	0	0	0	0	0	0	1	1	2	0	0	0	1	0	1	2	0	0	1	2	0	1	0	1
OTU_548	0	1	0	1	2	1	0	0	0	0	0	0	0	0	0	0	0	0	0	0	0	0	0	0	1	0	0	0	0	1	0	0	1	0	0	0	0	0	0	1	0	0	0	0	1	0	0	0	0
OTU_1146	0	0	0	0	0	0	0	0	1	0	0	0	0	0	0	1	0	0	0	0	0	1	1	0	0	0	0	0	0	0	1	0	0	0	0	0	0	0	0	0	0	0	0	0	0	0	0	1	0
OTU_1030	0	0	0	0	0	0	0	1	0	0	0	1	0	0	0	0	0	0	0	1	0	0	0	0	0	0	0	0	2	0	0	0	0	0	0	0	0	0	0	0	0	0	1	0	0	0	0	1	1
OTU_1423	0	0	0	0	0	0	0	0	0	0	0	0	0	0	1	0	0	0	0	0	1	0	0	0	0	0	0	0	0	0	0	0	0	0	0	0	0	0	0	0	0	0	0	1	0	0	0	0	0
OTU_792	0	1	0	0	0	0	0	0	0	0	0	0	0	1	0	0	1	0	0	0	0	0	0	1	0	0	0	0	0	0	1	0	0	1	0	0	0	0	0	0	0	0	0	0	0	0	0	0	0
OTU_324	0	1	0	0	0	1	0	0	0	0	0	0	1	1	0	0	0	1	0	2	3	0	1	1	0	1	2	0	0	3	1	0	1	2	0	1	0	0	1	0	0	0	1	0	0	0	0	0	0
OTU_786	0	0	2	0	0	2	2	0	1	0	0	0	0	2	2	1	0	0	1	1	0	1	4	0	0	1	1	0	0	1	0	1	1	0	0	1	0	0	0	0	0	1	1	0	0	0	0	0	0
OTU_1109	0	0	0	0	0	0	0	0	0	0	0	0	0	0	0	0	0	0	0	0	0	0	2	0	0	0	0	0	0	0	0	0	0	0	0	0	0	1	0	0	0	0	0	0	0	0	0	0	0
OTU_1112	4	1	0	0	0	0	1	0	0	3	1	2	0	0	0	0	0	0	1	0	0	0	0	0	0	2	2	0	0	1	1	0	0	0	2	1	4	1	0	0	2	0	0	2	0	1	0	1	0
OTU_871	0	0	1	0	0	0	2	1	1	0	0	1	1	0	0	0	1	0	0	0	1	2	0	0	0	0	0	0	0	1	0	0	1	2	0	1	0	1	0	1	0	0	0	0	0	0	0	0	0
OTU_1618	0	0	0	0	0	0	0	1	0	0	0	0	0	0	0	0	0	0	0	0	0	0	0	0	0	0	0	0	0	0	0	0	0	0	0	0	0	0	0	0	0	0	0	0	0	0	0	0	0
OTU_852	0	1	1	0	0	0	0	0	0	0	0	0	0	0	0	0	0	0	1	0	0	3	0	0	0	0	0	0	0	0	0	0	1	0	0	0	0	0	0	0	0	0	0	0	0	0	0	0	1
OTU_1003	0	0	0	0	0	0	0	0	0	0	0	0	0	0	0	0	1	0	0	0	2	0	0	0	0	0	0	0	0	0	0	1	0	0	1	0	0	0	0	0	0	0	0	0	0	0	0	0	1
OTU_1349	0	0	0	1	0	0	1	0	0	1	0	1	0	0	0	0	1	0	1	0	0	2	0	0	0	1	0	0	0	0	1	0	0	0	0	0	0	0	0	0	0	0	0	0	0	0	0	0	1
OTU_590	1	1	1	2	2	1	0	0	0	1	2	1	1	0	1	0	0	1	1	0	0	1	2	0	0	0	0	0	0	0	2	1	1	0	1	2	0	0	0	2	1	0	3	0	2	1	0	0	0
OTU_628	2	1	0	0	1	0	0	0	0	0	2	0	0	0	0	0	2	1	1	1	2	0	0	0	0	2	1	0	1	1	0	1	1	0	1	0	0	0	1	0	1	0	1	0	0	0	0	0	0
OTU_373	1	0	1	0	1	2	2	1	1	1	3	2	0	0	4	0	0	5	0	1	0	0	2	1	1	2	1	5	1	0	0	1	0	0	0	1	2	0	0	2	0	2	0	4	0	0	1	0	0
OTU_760	0	0	0	0	0	0	0	0	0	1	0	0	0	0	0	1	0	1	0	0	2	1	1	1	1	1	1	0	0	0	1	0	0	0	0	0	1	0	1	0	0	0	1	0	0	0	0	0	0
OTU_546	1	1	0	0	0	0	2	0	2	0	0	0	0	0	0	0	0	0	0	0	0	0	0	2	1	2	0	0	0	0	1	0	0	0	0	1	1	3	1	0	0	0	0	0	0	0	0	0	0
OTU_1611	0	0	0	0	0	0	0	0	0	0	0	0	0	0	0	0	0	0	0	0	0	0	0	0	1	0	0	0	0	0	0	0	0	0	0	0	0	1	0	0	0	0	0	0	0	1	1	0	0
OTU_1478	0	0	0	0	0	0	0	0	0	3	0	0	0	1	0	0	0	0	0	0	0	0	1	0	0	2	0	0	0	0	0	0	1	0	0	0	0	0	0	0	0	0	0	0	0	0	0	0	0
OTU_1068	0	0	1	0	0	1	0	0	0	0	0	0	0	0	0	0	0	0	2	0	0	1	1	1	0	0	0	1	0	0	0	0	0	0	1	0	0	0	0	0	0	0	0	0	0	0	0	0	0
OTU_1590	0	0	0	0	0	0	0	0	1	0	0	0	0	0	2	0	0	0	0	0	2	0	0	0	0	0	0	0	0	0	1	0	0	0	0	1	0	0	0	2	0	0	0	0	0	0	0	0	1
OTU_928	0	0	0	0	0	0	0	0	0	0	0	0	0	0	0	1	0	0	0	0	0	0	0	0	1	0	0	0	0	0	0	0	0	0	0	0	0	0	0	0	0	0	0	0	0	1	0	0	2
OTU_2431	0	0	0	0	0	0	0	0	0	0	0	0	0	0	0	0	0	0	0	0	0	0	0	0	0	0	0	0	0	0	0	0	0	0	0	0	0	0	0	0	0	0	0	0	0	0	0	0	0
OTU_376	0	1	1	0	0	0	0	0	0	1	1	0	2	0	1	0	2	0	2	0	0	2	1	0	0	0	1	0	1	0	1	0	2	0	0	4	0	0	0	3	0	0	2	0	0	0	0	1	1
OTU_1969	0	0	0	0	0	0	0	0	0	0	0	0	0	0	0	0	0	0	0	0	0	0	0	0	0	0	0	0	0	0	0	0	0	0	0	0	0	0	0	0	0	0	0	0	0	0	0	0	0
OTU_554	3	1	0	0	1	1	0	3	1	1	0	2	2	2	0	1	1	0	0	0	0	2	0	0	0	0	1	0	1	0	0	0	2	0	0	4	0	0	0	0	2	1	1	0	0	1	0	1	0
OTU_600	0	0	1	0	0	0	0	1	0	0	0	0	1	0	0	0	0	0	0	0	0	0	0	0	0	0	0	0	0	0	0	0	0	0	0	0	0	0	2	0	2	0	0	0	0	0	0	0	3
OTU_1323	1	0	0	0	1	0	0	0	1	1	2	0	2	1	1	3	0	0	0	0	5	1	0	3	3	0	2	3	3	1	1	3	1	0	0	2	2	0	0	1	4	0	0	7	0	2	2	0	2
OTU_825	0	2	0	0	0	0	0	0	0	1	0	1	0	0	0	0	0	0	0	2	0	0	0	0	0	0	0	0	0	0	0	0	0	1	0	0	1	1	1	0	0	1	0	1	0	0	0	0	0
OTU_2220	1	0	0	1	0	0	0	0	0	0	0	0	0	0	2	0	0	0	0	0	0	0	0	0	0	0	1	0	0	4	0	0	0	0	0	0	0	0	0	1	0	0	0	1	0	0	1	0	0
OTU_1180	0	0	0	0	0	0	1	0	0	0	0	0	0	0	0	0	0	0	0	0	0	0	0	0	0	0	0	1	0	0	0	0	0	0	0	0	0	1	0	0	0	0	0	0	0	1	1	0	0
OTU_696	0	0	1	0	1	0	1	0	0	0	0	1	0	0	0	0	0	0	1	1	0	0	0	0	1	1	0	0	0	0	0	1	1	0	0	0	0	0	0	0	0	0	0	1	1	0	0	0	0
OTU_1114	0	2	0	0	0	0	0	0	0	4	0	1	0	0	0	1	0	0	0	0	0	0	1	0	0	0	0	0	0	0	0	1	0	1	0	1	0	0	0	1	0	0	0	1	1	0	0	0	1
OTU_2319	0	0	0	0	0	0	0	1	0	0	0	0	0	0	0	0	0	0	0	0	0	0	0	0	0	0	0	0	0	0	0	0	1	0	1	0	0	0	0	0	0	0	0	0	0	0	0	0	0
OTU_969	0	0	0	0	0	0	1	1	0	0	0	0	0	0	0	0	0	0	0	0	0	0	0	0	0	0	0	0	0	0	0	1	1	0	1	0	0	0	0	0	0	0	0	1	0	0	0	0	0
OTU_2434	0	0	0	0	0	0	0	0	0	0	0	0	0	0	0	0	0	0	0	0	0	0	0	0	0	0	0	0	0	0	0	1	0	0	0	0	0	0	0	0	0	0	0	0	0	0	0	0	0
OTU_1411	0	0	0	0	0	0	0	0	0	0	0	0	0	0	1	0	0	0	0	0	0	0	0	0	0	0	0	0	0	0	0	1	0	0	0	0	0	0	0	0	0	0	0	0	0	0	1	0	0
OTU_905	0	1	0	0	3	2	1	0	0	0	0	0	0	0	0	0	0	1	0	0	0	0	0	0	0	0	0	1	0	0	0	0	0	0	0	0	0	1	0	0	0	0	0	0	0	0	0	0	0
OTU_1297	0	0	0	2	0	0	0	1	0	0	0	0	0	0	0	0	0	0	0	0	0	0	0	0	0	0	0	0	0	0	1	0	0	0	1	0	0	0	0	0	0	0	0	0	0	0	0	0	0
OTU_2384	0	0	0	0	0	0	0	0	0	0	0	0	0	0	0	0	0	0	0	0	0	0	0	0	0	0	0	0	0	0	0	2	0	0	0	0	0	0	0	1	0	0	0	0	0	0	3	0	0
OTU_589	1	2	0	0	2	0	1	0	1	0	0	1	0	0	0	0	1	1	1	0	2	0	0	1	0	2	3	0	1	0	0	0	0	0	0	1	0	2	2	0	1	0	0	1	0	1	0	0	1
OTU_1616	1	0	0	0	0	0	0	0	0	0	0	0	0	0	0	0	0	0	0	1	1	0	0	0	0	0	0	0	0	0	0	0	0	1	0	0	0	0	1	0	0	1	0	0	0	0	0	0	0
OTU_1988	0	0	0	1	0	0	0	0	0	0	0	0	0	0	0	0	0	0	0	0	0	0	0	0	0	0	0	0	0	0	0	0	0	0	2	0	0	0	0	0	0	0	0	0	0	0	1	0	0
OTU_354	0	1	1	0	0	0	0	2	1	0	0	2	1	1	0	0	1	0	0	1	1	1	1	0	2	1	0	2	1	0	1	1	0	0	0	2	1	0	0	2	1	0	0	0	1	0	0	0	1
OTU_430	0	3	2	0	3	2	2	2	0	2	0	0	0	0	1	1	0	0	0	2	0	0	0	3	0	1	2	2	1	0	0	2	0	0	0	1	0	1	1	0	0	5	1	0	0	1	2	0	0
OTU_699	1	0	1	0	0	0	1	0	1	0	0	1	2	1	1	1	4	1	0	0	0	1	0	0	0	0	0	0	0	0	0	0	1	1	0	0	0	1	1	1	0	0	0	0	1	1	0	0	2
OTU_1250	0	0	0	0	0	0	0	0	0	0	0	0	0	0	0	0	0	0	0	0	0	0	0	0	0	0	0	0	0	0	0	0	1	0	0	0	0	1	0	2	0	0	0	0	0	0	0	0	0
OTU_234	0	0	1	0	1	1	0	0	4	0	0	0	1	0	1	2	0	0	8	0	0	0	0	0	0	3	2	0	1	2	0	0	0	2	0	3	0	0	2	0	0	8	0	2	1	0	0	0	2
OTU_690	0	0	0	1	0	1	0	0	2	0	0	0	0	2	0	0	0	0	0	0	0	0	0	1	0	1	1	1	0	0	0	0	0	0	0	0	0	0	0	0	2	0	0	0	0	0	0	3	0
OTU_2439	0	0	0	0	0	0	0	0	0	0	0	0	0	0	0	0	0	0	0	0	0	0	0	0	0	0	0	0	0	0	0	0	0	0	0	0	0	0	0	0	0	0	0	0	0	0	0	1	0
OTU_1929	0	1	0	1	0	0	0	0	0	0	0	0	0	1	0	0	0	0	0	0	1	0	0	0	1	0	0	0	0	0	0	0	0	0	0	0	0	1	0	1	0	1	1	0	0	0	0	0	0
OTU_919	0	0	0	0	0	0	2	0	1	0	0	0	0	0	0	0	0	0	0	0	0	0	0	0	2	0	1	0	1	0	0	0	0	0	0	0	0	1	0	0	0	0	0	0	0	6	0	0	0
OTU_1346	0	0	0	0	0	0	0	0	0	0	0	0	0	0	0	0	0	0	0	0	0	0	0	0	0	1	0	0	0	0	0	0	0	0	0	0	1	0	0	0	0	0	0	0	0	0	0	0	0
OTU_816	0	0	0	0	0	0	0	1	0	0	0	0	0	1	1	0	0	0	0	0	1	0	0	0	0	0	2	0	0	0	1	0	2	0	0	0	0	0	0	0	0	0	0	0	0	1	0	0	0
OTU_1466	0	0	0	0	0	0	3	0	0	0	0	0	0	0	0	0	0	0	0	0	0	0	0	0	0	0	0	0	0	0	0	0	1	0	0	0	0	0	0	0	0	0	0	0	0	0	0	0	1
OTU_869	0	0	0	2	0	2	0	0	1	0	0	0	0	1	0	2	0	0	0	0	0	0	0	0	0	1	1	0	0	0	0	0	0	0	2	0	0	0	0	1	0	0	0	0	1	0	0	0	1
OTU_518	0	3	0	1	0	2	2	0	0	1	2	0	0	0	0	0	0	1	0	1	0	0	0	0	0	0	1	2	1	0	0	0	0	0	0	0	0	0	1	0	0	0	0	0	0	0	2	0	1
OTU_585	0	0	2	1	1	1	0	1	0	0	1	0	1	2	1	3	0	0	4	2	1	1	0	0	1	0	1	1	1	0	0	0	2	2	0	1	0	4	0	0	1	5	6	0	2	0	0	1	1
OTU_2272	0	0	0	0	0	0	0	0	0	1	0	0	0	0	0	0	0	0	0	0	0	0	1	0	0	0	1	1	0	0	0	0	0	0	0	0	0	0	0	0	0	0	0	0	1	0	0	1	0
OTU_1041	0	2	2	0	1	1	0	0	0	0	1	0	1	0	2	0	2	1	1	2	1	0	0	0	0	0	0	0	0	0	3	0	0	0	2	1	0	2	0	0	0	0	0	0	0	1	0	1	0
OTU_467	1	0	0	0	0	0	1	1	0	3	1	0	3	1	2	0	0	1	0	0	2	1	5	0	0	0	0	1	0	4	0	3	5	0	0	2	1	1	1	2	2	0	1	0	8	0	0	0	2
OTU_972	0	0	0	0	0	0	0	0	1	0	2	0	0	1	1	0	0	0	0	0	0	1	0	0	0	0	0	0	0	0	1	0	0	0	0	0	0	0	0	0	0	0	0	0	0	0	0	0	0
OTU_625	0	0	3	0	0	0	0	0	0	0	0	0	0	1	0	0	0	1	1	0	0	0	0	0	1	0	0	0	0	2	0	0	0	0	0	1	0	0	1	1	0	1	0	0	0	0	1	0	1
OTU_1368	0	0	0	0	0	0	2	0	0	2	0	0	0	0	0	0	0	0	1	0	0	0	0	0	1	0	0	1	1	0	0	0	0	1	0	0	0	0	0	0	0	3	0	0	0	0	0	0	1
OTU_1928	0	0	0	0	0	0	0	0	0	0	0	0	0	0	0	0	1	0	0	0	0	0	0	0	0	0	0	0	0	0	0	0	0	0	0	0	0	0	0	0	0	0	0	0	0	0	0	0	0
OTU_685	0	3	2	0	0	0	1	2	1	1	0	0	1	0	1	1	1	0	0	6	1	4	1	1	0	0	1	0	2	1	2	1	3	0	1	1	0	0	1	2	3	0	4	0	0	0	0	2	4
OTU_824	0	0	1	1	0	2	0	0	0	0	0	0	1	0	0	0	0	0	0	0	0	0	0	0	0	0	0	0	1	0	0	0	0	1	1	0	0	0	1	0	0	1	0	0	0	0	1	1	0
OTU_320	0	2	0	0	0	1	1	1	5	0	0	1	0	1	0	2	0	0	2	0	0	2	1	0	0	4	1	1	0	2	0	1	1	1	0	1	1	0	1	2	0	0	3	0	0	0	0	1	5
OTU_1865	0	0	0	0	0	0	0	0	0	0	0	0	0	0	0	0	0	0	0	0	0	0	0	0	0	0	0	0	0	0	0	0	0	0	0	0	0	0	0	0	0	0	0	0	0	0	0	0	0
OTU_184	2	0	1	3	1	2	0	0	1	0	1	1	0	2	1	0	1	1	0	0	0	0	1	0	3	2	2	0	0	1	0	2	0	1	0	0	0	3	0	2	0	1	0	1	0	0	3	0	1
OTU_1485	0	0	0	0	0	0	0	0	0	0	0	0	0	0	0	0	0	0	0	0	0	0	0	0	1	0	0	0	0	0	0	1	0	0	0	0	0	0	0	0	0	0	0	1	0	1	0	0	0
OTU_606	8	0	0	0	0	0	0	0	0	1	0	0	0	1	0	0	0	0	0	0	0	1	0	1	0	1	1	1	0	0	0	0	1	1	2	0	0	0	0	0	0	1	0	1	0	0	1	0	0
OTU_296	1	2	3	2	4	2	0	6	1	2	0	1	2	1	0	4	1	1	1	2	1	9	0	0	1	1	1	0	3	1	1	1	4	1	1	0	0	1	2	3	3	0	2	1	0	1	0	0	6
OTU_2514	0	0	0	0	0	0	0	0	0	0	0	0	0	0	0	0	0	0	0	0	0	0	0	0	0	0	0	0	0	0	0	0	0	0	0	0	0	0	0	0	0	0	0	0	0	0	0	0	0
OTU_280	0	3	0	1	1	0	0	0	0	0	0	0	0	0	0	1	1	0	0	1	3	1	0	0	1	2	0	1	2	1	0	0	1	1	4	1	2	1	1	0	3	0	3	0	0	0	0	1	0
OTU_1272	0	0	0	0	1	0	0	0	0	0	0	1	0	0	0	0	0	1	0	0	1	0	0	1	0	0	0	0	0	1	0	1	0	0	0	0	1	1	2	0	1	0	0	0	0	2	0	0	0
OTU_1343	0	0	0	0	0	0	1	0	0	0	0	0	0	0	0	2	0	0	0	0	0	0	0	0	0	1	0	0	0	0	0	0	0	0	0	0	0	0	0	0	0	0	0	0	0	0	0	0	0
OTU_1501	0	0	0	0	0	0	0	0	0	0	0	0	0	0	0	0	0	0	0	0	0	0	1	0	0	0	0	0	0	0	0	0	0	0	0	0	0	0	0	0	0	0	0	0	0	0	0	0	0
OTU_1866	0	0	0	0	0	0	0	0	0	0	0	0	0	1	0	0	0	0	0	0	0	0	0	0	0	0	0	0	0	0	0	0	0	0	0	0	0	0	0	0	0	0	0	0	0	0	5	0	0
OTU_1877	0	0	0	0	0	2	0	0	0	1	0	0	0	0	0	0	2	1	1	0	0	0	1	0	0	0	0	0	0	2	2	0	2	0	0	0	0	0	0	0	0	0	0	4	2	0	0	0	0
OTU_787	0	1	0	2	2	0	0	1	1	0	0	0	0	0	2	0	7	0	2	0	0	0	0	0	0	0	1	0	0	0	0	0	0	0	1	0	0	0	0	1	3	1	0	0	0	0	0	2	1
OTU_910	0	0	0	0	0	0	1	0	0	0	1	0	1	0	0	0	0	0	0	0	0	1	2	1	0	1	0	0	0	1	0	2	0	1	0	0	0	1	0	0	0	1	0	0	0	0	0	1	1
OTU_2520	0	0	0	0	0	0	0	0	0	0	0	0	0	0	0	1	0	0	0	0	0	0	0	0	0	0	0	0	0	0	0	0	0	0	0	0	1	0	0	0	0	0	1	0	0	1	0	0	0
OTU_2323	0	0	0	0	0	0	0	0	0	0	0	0	0	0	0	0	0	0	0	0	0	0	0	0	1	0	0	0	0	0	0	0	0	0	0	0	0	0	0	0	0	0	0	0	1	0	0	0	0
OTU_367	0	0	0	2	1	1	0	0	1	1	0	0	1	1	2	0	1	1	2	0	1	2	3	0	0	1	0	1	0	0	0	0	0	0	0	1	0	0	1	0	0	0	0	0	1	0	1	0	0
OTU_645	1	0	0	1	0	2	1	0	0	1	0	0	0	0	0	0	0	0	0	0	0	1	1	0	0	0	0	1	0	0	0	0	0	0	0	0	0	0	0	2	0	0	0	1	1	0	0	0	0
OTU_1414	0	0	0	0	0	0	0	1	0	0	0	0	0	0	0	0	0	2	0	0	0	0	0	0	0	0	0	0	1	0	0	0	0	1	0	0	0	0	0	0	0	3	0	0	1	0	0	1	0
OTU_996	0	0	0	0	0	0	0	0	0	0	1	0	0	0	0	0	0	1	0	0	0	2	0	0	2	0	0	0	0	0	0	0	0	0	0	0	0	0	0	0	0	1	0	1	0	0	0	0	0
OTU_2343	0	0	0	0	0	0	0	1	0	0	0	2	0	0	0	0	0	0	0	0	0	1	0	0	0	0	0	0	0	0	0	0	0	0	0	0	0	0	0	0	0	0	0	0	0	0	0	0	0
OTU_769	0	0	0	0	0	0	0	0	0	0	0	0	0	1	0	1	0	1	1	0	0	0	0	0	0	0	0	0	0	1	0	0	0	0	0	0	0	0	0	0	0	1	0	0	0	0	0	0	2
OTU_1175	0	0	0	0	0	0	0	0	0	1	0	0	0	0	0	0	0	0	0	0	1	0	0	0	0	0	0	0	0	0	0	0	0	0	0	0	0	0	0	0	0	0	0	0	0	0	0	0	0
OTU_1201	0	0	0	0	0	0	0	0	0	0	0	0	0	0	0	0	0	0	0	0	0	0	0	0	0	0	0	1	0	0	0	0	0	0	0	0	0	0	0	0	0	0	0	0	0	0	0	0	0
OTU_422	2	0	0	0	0	2	2	0	1	0	0	0	0	0	0	0	0	0	0	0	0	0	0	0	1	0	0	1	1	1	0	0	0	0	0	0	0	1	0	1	0	1	0	0	0	0	0	0	0
OTU_667	0	0	3	0	0	1	0	0	0	0	0	0	1	0	0	0	0	0	1	0	0	2	0	1	0	0	2	0	1	0	3	0	1	0	1	0	0	0	0	0	0	0	1	0	0	1	0	1	2
OTU_679	1	0	0	0	1	0	0	0	2	1	0	1	0	1	0	0	0	0	0	0	0	0	0	1	0	2	0	0	0	0	1	1	0	0	0	2	1	0	1	1	1	0	0	1	0	0	0	0	0
OTU_681	0	0	1	0	0	3	0	0	0	3	0	0	0	1	2	0	0	0	0	1	0	0	0	0	1	0	0	0	1	0	0	0	0	0	0	0	2	0	3	0	0	0	0	0	0	0	0	0	1
OTU_359	1	0	0	0	0	0	2	0	0	0	0	0	0	0	1	0	0	1	0	0	0	0	0	0	2	0	0	1	0	1	0	0	0	1	0	0	0	1	0	0	0	0	0	0	0	0	0	0	0
OTU_640	0	3	1	0	0	0	0	0	0	0	0	0	0	0	0	1	0	0	0	0	1	0	0	0	0	0	0	0	0	0	0	0	1	0	0	0	0	0	0	0	1	0	0	0	0	3	0	0	0
OTU_490	0	0	0	0	0	0	1	0	0	0	1	0	0	0	0	0	0	0	0	1	0	0	0	0	1	2	0	1	1	0	0	0	1	0	0	0	0	0	0	0	0	0	0	1	1	0	1	1	1
OTU_242	0	4	3	1	0	1	0	1	0	1	5	0	2	0	1	5	3	0	0	2	3	4	1	0	4	1	0	0	0	0	0	0	2	1	0	0	3	0	2	0	1	0	1	0	1	0	0	2	0
OTU_516	0	0	0	0	0	0	1	1	0	0	0	0	4	0	0	0	0	0	0	1	1	0	0	0	0	0	0	0	0	0	3	0	0	0	1	0	0	0	0	1	1	0	1	0	0	1	0	0	1
OTU_1376	0	0	0	0	0	0	0	0	0	0	0	1	0	0	0	0	0	0	0	0	0	0	0	0	0	0	0	0	0	0	0	0	0	0	0	0	0	0	0	0	0	0	0	0	0	0	0	0	0
OTU_313	0	1	1	1	0	0	0	0	0	0	0	1	0	2	3	0	1	0	1	2	0	0	0	0	0	0	1	0	0	0	2	1	0	0	1	0	0	0	0	1	1	1	1	1	0	0	0	0	1
OTU_1147	0	0	0	0	0	0	0	0	0	0	0	0	0	0	0	0	0	0	0	0	0	0	0	0	1	0	0	0	0	0	0	0	0	0	0	0	0	2	0	1	0	0	0	2	1	0	0	0	0
OTU_2036	0	1	0	0	0	0	0	0	0	0	0	0	0	0	0	0	0	0	0	0	0	0	1	0	0	0	0	0	0	0	0	0	0	0	0	0	0	0	0	0	0	0	0	0	0	0	0	0	1
OTU_639	1	0	0	1	2	0	1	0	2	1	0	0	2	0	0	0	0	0	0	1	0	0	0	0	1	0	0	1	0	0	1	0	0	1	0	1	1	1	0	2	0	3	0	0	1	3	0	1	2
OTU_976	0	0	0	0	0	0	0	0	0	0	0	0	0	0	0	0	0	0	0	0	1	1	1	0	0	0	0	0	0	0	0	1	0	0	0	0	0	0	0	1	0	1	0	0	0	0	0	1	0
OTU_316	4	3	2	4	1	1	2	2	2	1	6	1	2	2	4	4	6	2	1	0	0	2	0	0	1	0	4	0	1	0	2	1	2	2	4	2	1	0	2	3	3	5	1	1	1	4	4	4	3
OTU_352	2	0	0	0	2	0	3	0	1	0	1	1	2	1	1	0	0	2	0	0	1	0	0	2	1	1	0	0	0	0	0	0	0	1	1	2	2	2	0	0	1	1	0	0	0	1	2	0	0
OTU_418	0	1	0	1	0	1	0	0	1	0	0	0	1	0	0	0	0	0	0	0	0	0	0	1	0	0	0	0	1	0	1	1	0	0	0	1	1	1	1	0	0	0	0	0	0	0	1	0	0
OTU_2569	0	0	0	0	1	0	0	0	0	0	0	0	0	0	0	0	0	0	0	0	0	0	0	0	0	0	0	0	0	0	0	0	0	0	0	0	0	0	0	0	0	0	0	0	0	0	0	0	0
OTU_2011	0	0	0	0	0	0	0	0	0	0	0	0	0	0	0	0	0	0	0	0	0	0	0	0	0	0	0	0	0	0	0	0	0	0	0	0	0	0	0	0	0	0	0	0	0	0	0	0	0
OTU_1570	0	0	0	0	0	0	0	0	0	0	0	0	1	0	0	0	0	0	0	0	0	1	0	0	0	0	0	0	0	0	0	1	0	0	0	0	0	0	0	0	0	0	0	0	0	0	0	0	0
OTU_2196	1	1	0	0	0	0	1	1	0	0	0	0	0	0	1	0	0	0	1	0	0	0	0	0	0	0	0	0	0	0	0	0	0	2	0	0	0	0	0	0	0	0	0	0	0	0	0	1	0
OTU_827	0	0	0	0	0	0	0	0	0	0	0	0	0	0	0	0	0	0	0	0	0	0	0	0	0	0	0	0	0	0	0	0	0	0	0	0	0	0	1	0	0	0	0	0	3	0	0	0	2
OTU_1864	1	0	2	0	0	0	0	0	0	0	0	0	0	1	0	1	0	0	1	0	0	0	0	0	0	1	1	0	0	0	0	0	0	0	0	0	0	0	0	0	0	0	2	0	0	0	0	0	0
OTU_1629	0	0	0	0	0	0	0	0	0	0	0	0	0	0	0	0	0	0	0	0	0	0	0	0	1	0	0	1	0	0	0	0	0	0	0	0	0	0	0	0	0	0	0	0	0	0	0	0	0
OTU_1672	1	0	1	0	0	0	0	0	1	0	0	0	0	1	0	0	0	0	0	1	0	0	0	0	0	0	0	0	0	0	0	0	0	0	0	0	0	0	0	0	0	0	0	0	1	0	0	0	0
OTU_1042	0	0	2	1	0	0	0	2	0	0	1	0	1	0	0	2	0	1	1	0	0	0	0	0	2	0	0	0	0	0	0	0	0	1	1	0	1	2	1	0	1	0	0	4	0	0	2	0	0
OTU_1680	0	0	0	0	0	0	0	0	0	0	0	0	0	0	0	0	0	0	0	0	0	0	0	0	0	0	0	0	0	0	0	0	0	0	1	0	0	0	0	0	0	0	0	0	0	0	0	0	0
OTU_224	0	0	1	1	0	1	0	0	0	1	0	0	0	1	0	2	1	2	1	0	1	1	1	1	0	1	1	1	2	1	0	1	2	0	0	0	1	0	0	3	0	1	0	0	0	2	1	1	1
OTU_542	1	1	1	0	0	0	0	2	1	0	0	2	0	0	0	0	0	0	0	0	0	1	1	0	0	0	0	0	0	1	0	0	1	1	1	0	0	0	2	0	0	9	0	0	0	0	3	0	0
OTU_1080	2	0	1	0	0	0	0	0	0	0	0	0	0	0	0	0	0	0	1	0	2	0	0	0	0	0	0	0	0	0	0	0	0	0	0	0	0	0	0	0	0	0	0	0	0	0	0	0	1
OTU_2453	0	1	0	0	0	0	0	0	0	0	0	0	0	1	0	2	0	0	0	0	1	0	0	0	0	0	0	0	0	0	1	0	0	1	0	0	0	0	0	0	1	1	0	0	0	0	0	1	0
OTU_495	0	0	0	0	0	1	1	0	0	0	0	0	0	0	0	1	0	0	0	0	0	0	0	1	0	0	1	0	1	1	1	2	0	0	1	0	1	1	1	0	1	0	1	0	0	0	0	0	0
OTU_228	1	0	0	1	0	1	0	2	1	0	1	2	0	1	1	1	1	2	0	0	0	0	2	2	0	0	1	4	1	6	0	4	2	1	1	2	0	1	1	1	1	5	0	1	0	1	2	0	0
OTU_1873	0	0	0	0	1	0	0	0	0	0	0	0	1	0	0	0	0	0	1	1	0	3	1	0	0	0	1	0	1	0	0	0	1	0	0	0	0	1	0	0	0	0	0	0	0	0	0	0	0
OTU_1230	0	0	0	0	0	0	0	0	0	0	0	0	0	0	0	1	0	0	1	0	0	0	0	0	0	0	0	0	0	0	0	0	0	0	0	0	0	1	0	1	0	0	0	0	0	0	0	0	0
OTU_1702	1	0	0	0	0	0	0	0	0	0	0	1	0	0	0	0	0	0	0	0	0	0	0	0	0	0	0	0	0	0	0	0	0	0	0	0	0	0	1	0	0	0	0	0	0	0	0	0	0
OTU_775	2	0	1	1	0	0	0	0	1	0	0	0	0	0	0	1	0	0	0	0	0	0	0	0	0	0	0	2	0	0	0	0	0	0	0	0	0	0	0	0	0	0	0	0	1	0	0	0	0
OTU_1640	0	0	0	1	0	0	0	0	0	0	0	0	0	0	0	0	0	0	0	0	0	0	0	0	0	1	0	0	0	0	0	0	0	0	0	0	0	0	0	0	0	0	0	0	1	0	0	0	0
OTU_1525	0	0	0	0	0	0	0	0	0	0	0	2	0	0	0	0	0	0	0	1	0	0	1	0	1	1	0	0	0	0	0	0	0	0	1	0	0	1	0	0	1	0	0	0	0	1	0	0	0
OTU_1697	0	0	0	0	0	0	0	0	0	1	2	0	0	0	0	0	0	0	0	0	0	0	0	0	0	1	0	0	0	0	0	1	0	0	0	0	0	0	0	0	0	0	0	0	0	0	0	0	0
OTU_277	0	1	1	1	6	1	1	0	0	0	2	3	1	1	1	2	0	0	0	2	1	1	1	1	3	0	0	2	0	1	1	0	0	0	0	1	2	0	1	1	1	0	1	1	1	1	0	0	1
OTU_1868	0	1	0	0	1	0	0	0	0	0	1	0	0	0	0	1	0	3	0	0	1	0	1	0	0	1	0	0	0	0	0	0	0	0	1	5	0	0	2	0	1	0	0	6	0	0	0	0	0
OTU_1217	0	0	0	0	0	1	0	0	0	0	0	0	1	0	0	0	0	0	0	0	0	0	2	0	1	0	1	0	0	1	0	0	0	1	0	0	0	0	0	0	0	0	1	0	0	0	0	0	0
OTU_1364	0	0	0	0	0	0	0	0	0	0	0	0	0	0	1	0	1	0	0	0	0	0	0	0	0	0	0	0	0	1	0	0	0	0	0	1	0	0	0	0	0	0	0	0	0	0	0	0	0
OTU_1506	0	0	0	0	1	0	0	0	0	1	0	0	0	0	0	0	0	0	0	0	0	0	0	0	0	2	0	0	0	0	0	0	0	0	0	0	0	0	0	0	0	0	0	1	0	0	0	0	0
OTU_711	0	0	0	0	0	0	0	0	1	0	0	0	0	0	0	1	0	0	0	0	0	0	0	0	0	1	0	1	1	0	0	0	1	0	0	0	0	0	2	1	1	0	0	0	0	0	1	0	0
OTU_388	2	0	1	1	1	1	0	0	2	2	1	0	2	0	0	0	0	0	0	1	0	1	0	0	0	0	0	2	0	0	0	0	0	0	0	1	1	0	0	1	1	0	0	0	1	1	1	1	0
OTU_1134	1	1	0	0	0	0	0	0	0	0	1	0	0	0	0	0	0	0	0	0	0	0	0	0	2	1	0	1	0	0	0	0	0	0	0	0	0	2	0	0	0	1	0	0	0	0	0	0	0
OTU_454	0	0	0	0	0	0	0	0	0	0	0	0	1	1	0	0	0	0	0	0	0	0	0	1	0	0	0	0	0	3	0	0	0	0	0	0	3	0	1	0	0	0	0	0	0	0	0	0	0
OTU_2106	1	1	0	0	0	1	1	0	2	0	0	1	0	0	0	0	0	1	0	1	1	0	0	0	2	1	2	0	0	0	0	0	3	2	0	1	0	3	1	0	1	2	0	0	1	0	0	0	1
OTU_2481	0	0	0	0	0	0	0	0	0	0	0	0	0	0	0	0	0	0	0	0	0	0	0	0	0	0	0	0	2	0	0	0	0	0	0	0	0	0	0	0	0	0	0	0	0	0	0	0	0
OTU_1173	0	1	0	0	0	0	0	0	0	0	0	0	0	0	0	0	0	0	0	0	0	0	0	0	0	0	0	0	0	1	0	2	0	5	0	0	0	0	0	0	0	1	0	0	0	0	0	0	0
OTU_250	0	4	0	0	0	0	0	1	0	0	1	1	0	1	0	2	0	0	1	1	1	1	0	0	2	0	0	3	0	0	1	2	2	0	1	0	0	0	1	0	1	0	0	0	0	0	2	1	1
OTU_293	0	0	0	0	0	0	0	0	0	0	0	0	1	0	1	1	0	0	0	0	0	1	0	0	0	2	1	1	1	0	0	0	0	1	0	0	0	3	1	0	0	1	0	0	0	0	2	0	1
OTU_273	2	2	1	0	2	1	0	0	1	0	0	1	0	1	2	0	0	0	1	1	0	1	0	0	0	0	0	0	1	0	0	0	0	0	0	0	1	0	1	2	0	0	1	0	0	1	2	0	0
OTU_2296	0	0	0	0	0	0	0	0	0	0	0	0	0	0	0	0	0	0	0	0	0	0	0	0	0	0	0	0	0	0	0	0	0	0	0	0	0	0	0	0	0	0	0	0	0	0	0	1	0
OTU_1354	0	0	0	0	0	0	0	0	1	0	0	0	0	0	0	0	0	0	0	0	0	0	0	0	0	0	1	0	0	0	0	0	0	0	1	0	0	0	0	0	0	0	1	0	0	0	0	0	1
OTU_226	3	0	0	2	1	0	0	0	0	2	1	0	1	0	1	1	4	1	0	4	5	0	4	0	1	0	3	2	6	0	0	0	0	1	2	1	0	1	2	0	2	0	2	1	1	3	1	3	2
OTU_451	3	0	0	0	0	0	2	0	0	1	0	0	0	0	0	0	1	0	0	0	1	0	1	0	0	0	0	1	0	0	1	0	0	0	0	0	0	1	1	0	0	0	0	0	0	0	0	0	0
OTU_1185	2	0	0	0	0	2	0	1	0	0	0	1	0	1	0	0	0	0	0	1	0	1	2	1	0	0	0	2	0	0	0	2	0	0	0	0	0	1	0	0	0	0	0	1	0	0	1	0	0
OTU_530	1	0	0	1	1	1	0	0	0	2	0	1	0	0	0	0	0	1	2	0	1	0	0	1	2	2	0	0	0	1	0	0	0	1	0	0	1	1	0	0	2	0	0	1	1	0	0	0	0
OTU_491	0	1	0	1	0	0	0	0	0	0	0	0	0	1	1	1	0	1	0	0	0	0	0	0	0	0	0	0	0	0	0	0	1	0	0	0	0	0	0	0	1	0	0	0	0	0	0	0	0
OTU_474	0	1	1	0	0	1	0	0	1	2	0	1	0	2	0	0	0	0	2	0	1	0	2	0	2	0	0	0	0	0	0	0	0	2	0	1	0	0	0	0	0	0	0	4	0	0	1	0	0
OTU_1129	0	0	0	0	0	0	1	0	0	0	0	0	0	0	1	0	0	0	0	0	0	0	0	0	0	0	0	0	0	0	0	0	0	0	0	0	1	1	0	0	0	0	0	0	1	0	0	0	0
OTU_515	2	4	0	0	1	2	0	4	1	0	1	1	1	1	0	0	0	0	2	1	0	1	1	2	0	1	1	2	1	2	0	1	3	0	2	1	0	2	0	0	1	0	1	1	2	0	1	0	0
OTU_1851	0	0	0	0	0	0	0	0	0	0	0	0	0	0	0	0	0	0	0	0	0	0	0	0	0	0	0	0	0	1	0	0	0	0	0	0	1	0	0	0	0	0	0	0	0	0	0	0	0
OTU_605	0	0	0	1	0	0	0	0	0	0	0	0	0	0	0	1	1	0	0	0	0	0	0	0	0	0	0	0	0	0	1	0	0	0	0	0	0	0	0	0	0	0	0	0	0	0	0	1	0
OTU_1382	0	0	0	0	0	0	0	0	0	0	0	1	0	0	0	0	0	0	0	0	0	0	0	0	0	0	0	1	0	0	0	0	0	0	0	0	0	1	0	0	1	0	0	0	0	0	0	0	0
OTU_1967	0	0	0	0	0	0	0	0	0	0	0	0	0	0	1	0	0	0	0	0	0	0	0	0	0	0	0	0	0	1	0	0	0	0	0	1	0	0	0	0	0	0	0	0	0	0	0	0	0
OTU_2141	0	1	0	0	0	0	0	0	0	0	0	0	0	0	0	0	0	0	0	0	0	0	0	0	0	1	0	0	0	0	1	0	0	0	0	0	0	0	0	0	0	0	0	0	0	0	0	0	0
OTU_1383	0	0	0	0	0	0	0	0	0	0	0	0	0	0	0	0	0	0	0	0	0	0	0	0	0	1	0	0	0	0	0	0	0	0	1	0	0	0	0	0	0	0	0	0	0	0	0	2	0
OTU_2048	0	0	0	1	0	0	0	0	0	0	0	0	0	0	0	0	0	0	0	0	0	0	0	0	0	0	0	0	0	0	0	0	0	0	0	0	0	0	0	0	0	0	0	0	0	0	0	0	0
OTU_2114	0	0	0	0	0	0	1	0	0	0	0	1	0	0	0	0	0	1	0	0	1	0	0	0	1	0	1	0	0	0	0	0	0	0	0	0	0	2	0	1	0	1	0	4	0	1	4	0	0
OTU_1706	0	0	0	0	0	0	0	0	0	0	0	1	0	0	0	0	0	0	0	0	0	0	0	0	0	0	2	0	0	0	1	0	0	1	0	0	0	0	0	1	0	0	0	0	0	0	0	0	0
OTU_1371	0	0	0	0	0	0	0	0	1	1	0	0	0	1	0	0	0	0	0	1	0	2	0	0	0	0	2	0	0	1	1	0	3	0	0	0	0	0	0	0	0	0	0	0	0	0	0	0	1
OTU_851	0	0	0	1	0	2	0	0	0	0	0	1	0	0	0	0	0	0	0	0	0	0	0	0	0	0	0	0	1	0	0	0	0	2	1	0	1	2	0	0	0	2	0	0	0	0	0	0	0
OTU_741	0	2	2	1	0	0	0	1	1	1	2	1	0	0	1	0	0	0	0	0	0	1	1	3	1	0	0	1	3	4	2	1	0	0	0	1	0	1	1	0	1	1	1	0	0	0	1	0	0
OTU_632	0	0	1	1	0	1	1	1	0	0	0	1	0	0	0	0	0	1	0	0	1	0	0	0	0	0	1	0	0	1	0	0	0	0	0	0	0	2	1	1	0	0	0	0	2	0	0	0	0
OTU_2077	0	0	1	0	1	0	0	0	0	1	0	0	0	0	2	0	0	0	0	0	0	0	0	0	0	0	0	0	0	0	0	0	0	0	0	0	1	0	0	0	0	0	0	0	0	0	0	0	0
OTU_1282	0	1	0	0	0	0	0	0	0	0	0	0	2	0	0	0	1	0	0	0	1	1	0	0	0	0	0	0	1	0	0	0	0	0	0	0	0	0	0	0	0	0	0	0	0	0	0	1	0
OTU_718	2	0	1	1	2	0	0	1	2	0	1	2	0	0	0	0	0	0	0	0	0	0	2	1	0	0	0	0	1	0	0	1	0	1	0	0	1	1	2	1	0	0	0	3	1	0	0	0	0
OTU_537	1	0	0	0	2	0	0	0	0	0	1	0	0	1	1	0	1	0	1	0	0	0	0	0	0	0	0	0	0	0	0	0	0	0	3	3	0	0	0	0	0	0	0	1	0	0	0	0	0
OTU_1822	0	0	0	0	0	0	0	0	0	0	0	0	0	0	0	0	0	1	0	0	0	0	0	0	0	1	0	0	0	0	0	0	0	0	0	0	0	0	0	0	0	0	0	0	0	0	0	0	0
OTU_523	0	0	0	2	0	4	0	0	1	0	0	1	0	0	0	0	0	1	0	0	0	0	0	0	0	1	1	0	0	0	0	0	0	0	0	0	0	1	0	0	0	0	0	1	1	0	0	0	1
OTU_1273	0	0	0	0	0	0	0	1	0	0	1	0	0	0	3	0	1	0	1	0	0	1	0	0	0	0	0	0	3	0	0	1	0	0	0	2	0	1	2	0	0	0	1	0	0	0	1	0	0
OTU_1169	0	0	0	0	0	0	1	0	1	0	0	0	0	0	0	0	0	0	0	0	1	0	0	1	0	1	0	0	0	0	0	0	0	0	0	0	0	0	1	0	0	0	0	0	0	0	1	0	0
OTU_1043	0	0	0	0	0	0	0	0	0	1	0	0	1	0	0	0	0	0	0	0	0	0	1	0	0	0	0	0	0	0	0	1	0	0	1	1	0	0	0	0	1	0	0	1	0	0	2	0	0
OTU_1426	0	1	0	0	0	0	0	0	1	0	0	0	0	1	0	0	0	0	0	0	0	1	0	1	0	0	0	0	0	0	1	0	0	0	0	0	0	0	0	0	0	0	0	0	0	0	0	0	1
OTU_648	0	0	0	1	6	0	0	0	0	0	0	0	0	0	1	0	0	0	0	1	0	1	0	0	1	0	0	1	0	0	0	0	0	1	2	0	1	3	1	1	0	0	0	0	0	0	1	0	0
OTU_487	3	0	0	1	0	0	3	1	0	0	2	1	0	1	0	0	0	2	1	0	0	0	5	0	1	2	0	1	0	0	0	0	0	0	1	1	1	0	1	0	0	0	0	0	1	0	1	1	0
OTU_1515	0	1	0	0	0	0	1	0	0	0	0	0	0	2	0	0	0	0	0	0	0	0	0	0	0	0	1	0	0	0	1	0	0	0	0	0	0	0	0	0	0	0	0	0	0	0	0	0	0
OTU_1280	0	0	0	0	0	0	0	0	0	0	0	0	0	0	0	0	0	0	0	0	0	0	0	0	0	0	0	0	1	0	0	0	0	0	0	0	0	0	1	0	0	0	0	0	0	0	0	0	0
OTU_1126	0	1	0	3	0	0	0	0	1	1	0	1	0	0	0	0	0	0	0	0	0	0	0	0	2	1	0	1	0	0	0	0	0	0	0	0	0	0	0	0	1	1	0	0	1	1	0	0	0
OTU_2237	0	1	0	0	1	0	0	0	0	0	0	0	0	1	0	0	0	0	0	0	0	0	0	0	0	0	0	0	0	1	0	0	0	0	1	0	0	0	0	0	0	0	0	0	0	0	0	1	0
OTU_588	1	0	1	0	0	1	1	0	0	1	0	0	5	0	2	0	1	0	0	1	2	1	1	0	0	0	1	0	0	0	0	0	1	4	1	0	1	1	0	0	1	0	0	1	0	0	1	1	0
OTU_1150	0	0	0	0	0	0	1	0	0	0	0	0	0	0	0	0	0	0	1	0	0	0	0	0	0	0	0	0	0	0	0	0	0	0	0	0	0	0	0	0	0	0	0	1	0	0	0	0	0
OTU_1247	0	0	0	0	1	0	1	0	0	0	0	0	0	0	0	0	0	0	0	0	0	0	0	0	0	0	0	0	0	0	0	0	0	0	0	0	0	0	0	0	0	0	0	0	0	0	0	0	0
OTU_610	1	0	0	1	0	0	0	1	0	2	0	2	0	0	1	0	0	0	0	0	0	0	0	0	0	0	0	0	1	1	0	0	0	0	0	1	0	1	0	0	0	0	1	0	0	0	1	0	0
OTU_1710	1	0	0	0	0	1	0	0	0	0	1	0	0	0	0	0	0	0	0	0	0	0	0	0	1	0	0	0	2	0	0	0	0	0	0	0	0	0	0	0	0	0	0	0	0	0	1	0	0
OTU_666	0	0	0	0	0	3	1	0	0	1	0	0	0	0	0	0	0	1	0	0	0	0	0	1	1	0	0	0	0	1	0	0	0	0	1	0	1	0	0	1	0	0	0	0	1	0	0	0	0
OTU_2407	0	0	1	0	1	0	0	2	2	1	1	1	0	1	0	0	0	0	1	2	0	1	3	0	0	0	1	0	0	1	1	2	1	0	0	0	1	0	0	1	1	2	1	0	1	0	0	1	1
OTU_327	0	0	2	0	1	0	0	0	0	0	0	1	1	0	1	1	1	0	1	3	1	0	0	0	1	0	3	1	3	0	2	0	0	0	0	0	1	0	3	0	4	0	0	0	0	0	0	0	2
OTU_2509	0	0	0	0	0	0	0	1	0	0	0	0	0	0	0	0	1	0	0	1	0	0	0	0	0	0	0	0	0	0	0	0	0	0	0	0	0	0	0	0	0	0	0	0	0	0	0	1	0
OTU_1816	0	0	0	0	0	0	0	0	0	0	0	0	0	0	0	0	0	0	1	0	0	0	0	0	0	0	0	0	0	0	0	0	0	0	0	0	1	0	0	0	0	0	0	1	0	0	0	0	0
OTU_2037	0	1	0	0	0	0	0	0	0	0	1	0	0	0	0	0	3	0	0	0	0	2	1	0	1	1	2	0	0	0	3	0	0	0	0	1	0	0	0	0	0	0	0	0	0	0	0	1	0
OTU_2256	0	0	0	0	0	0	0	0	0	0	0	0	0	0	0	0	0	0	0	0	0	0	0	0	0	0	0	0	0	0	0	0	0	1	0	0	0	0	0	0	0	0	0	0	0	0	0	0	0
OTU_1370	0	0	0	0	0	0	0	0	0	0	1	0	0	0	0	0	1	0	0	0	0	0	0	0	0	0	0	0	0	0	0	0	0	0	1	0	1	0	0	0	0	0	0	0	1	1	0	0	1
OTU_203	2	0	3	0	0	3	3	1	6	1	2	4	4	2	6	0	1	2	0	4	4	1	4	4	1	3	2	2	0	2	2	3	3	2	3	4	0	3	3	0	0	0	0	1	2	4	3	3	2
OTU_2173	0	0	0	0	0	0	0	0	0	0	0	0	0	0	0	0	0	0	0	0	0	0	0	0	0	0	0	0	1	0	1	0	0	0	0	0	0	0	0	0	0	0	0	0	0	0	0	0	0
OTU_1319	0	0	0	0	0	0	0	0	0	0	0	0	0	0	0	0	0	0	1	0	0	0	0	0	0	0	0	0	1	0	1	0	0	0	0	0	0	0	0	0	0	0	0	0	0	0	0	0	0
OTU_1733	0	0	0	0	0	0	0	0	0	0	0	1	0	0	0	0	1	1	0	0	0	0	0	1	0	0	0	0	0	0	0	0	0	2	0	2	0	0	0	0	0	0	0	0	0	0	0	0	0
OTU_991	0	0	0	0	0	0	0	0	0	0	0	0	0	0	0	0	0	0	0	0	1	0	0	0	0	0	2	1	0	0	0	0	1	0	1	0	0	1	0	0	0	0	0	0	0	0	0	0	0
OTU_1755	0	0	0	0	0	0	0	0	0	1	0	0	0	0	0	0	0	0	0	0	0	0	0	0	0	0	0	0	0	0	0	0	0	0	0	0	0	0	0	0	0	0	0	0	0	0	1	0	0
OTU_638	0	0	0	2	0	1	1	0	0	0	0	0	0	0	0	1	0	1	1	0	1	0	1	0	0	3	0	1	0	0	0	0	0	0	0	0	0	0	0	0	0	3	0	0	1	0	0	0	0
OTU_1819	0	0	1	1	0	0	0	0	1	0	2	1	0	0	0	0	0	2	0	0	1	0	1	1	2	5	3	0	1	2	0	3	0	2	0	0	0	5	0	0	0	2	0	2	0	3	1	0	0
OTU_1746	0	0	1	0	0	1	0	0	0	0	0	0	0	0	0	0	0	1	0	0	0	0	0	0	0	0	0	0	0	0	1	0	0	0	0	1	0	1	0	0	0	0	0	0	0	0	0	0	0
OTU_1130	0	1	0	1	0	0	0	0	0	0	0	0	0	0	1	0	0	0	0	0	0	0	0	0	0	0	0	0	0	0	0	0	1	0	0	0	0	0	0	0	0	0	0	0	0	0	0	0	0
OTU_1268	0	0	0	0	0	0	0	4	0	0	0	0	0	0	0	0	0	0	0	0	0	0	0	0	0	0	0	0	0	0	0	0	0	0	0	0	0	0	0	0	0	0	0	0	0	0	0	0	0
OTU_1500	0	0	1	0	0	1	0	1	0	0	0	0	0	0	3	0	3	0	0	0	0	0	0	0	0	0	0	0	0	0	0	1	0	0	0	0	0	0	0	0	0	0	0	0	0	0	0	1	0
OTU_2050	0	0	0	0	0	1	0	0	0	0	0	0	0	0	0	0	0	0	2	0	0	0	1	0	0	0	0	0	0	0	0	0	0	0	0	0	0	0	1	0	0	0	0	0	0	0	0	0	0
OTU_1599	0	0	0	0	0	1	1	0	0	0	0	1	0	0	1	0	0	0	0	0	0	0	0	1	0	0	0	0	0	0	0	0	0	0	0	0	0	0	0	0	0	0	0	0	0	0	0	1	0
OTU_2283	0	0	0	0	0	0	0	0	0	0	0	0	0	0	1	0	0	0	0	0	0	0	0	0	0	0	0	0	0	0	0	0	0	0	0	0	1	1	0	0	0	0	0	0	1	0	0	0	0
OTU_789	1	1	0	0	0	0	1	0	0	0	0	0	0	0	0	0	1	0	0	0	0	0	0	1	1	0	0	0	0	0	3	0	1	0	0	0	2	0	0	1	0	0	0	0	0	0	1	0	0
OTU_614	0	2	0	0	0	0	0	1	0	0	0	0	0	0	1	0	0	0	1	0	0	0	0	0	0	0	0	0	0	0	0	1	0	0	0	0	1	0	0	0	1	0	0	0	0	0	0	0	0
OTU_1061	0	0	0	0	1	0	0	0	0	0	1	0	0	1	0	0	0	0	2	0	0	0	0	0	0	0	0	1	0	0	0	0	0	0	0	1	0	0	0	0	0	0	0	0	1	0	0	0	0
OTU_1402	0	0	0	1	0	0	1	0	0	0	0	0	0	0	1	0	0	0	0	0	0	0	0	0	0	0	0	0	0	0	0	0	0	0	0	0	1	0	0	0	0	0	0	0	0	0	0	1	0
OTU_323	1	1	0	0	1	0	0	1	0	1	0	0	0	1	0	0	1	1	0	1	0	0	0	0	1	0	0	1	1	0	0	0	2	0	0	0	0	0	0	9	1	0	2	0	0	0	0	1	4
OTU_2142	0	0	0	0	1	0	0	1	0	0	1	0	0	0	0	0	1	0	0	0	0	0	0	0	0	0	0	0	0	0	0	1	0	0	0	0	0	0	0	0	0	0	0	0	0	0	0	0	0
OTU_1945	0	0	0	0	0	0	0	1	1	0	0	0	1	0	0	0	1	1	0	0	0	0	0	0	0	0	0	1	0	0	0	0	0	0	0	0	0	0	0	0	0	0	0	0	0	1	0	0	0
OTU_2104	0	0	0	0	0	1	0	0	0	0	0	0	2	0	0	0	0	0	0	0	0	0	0	0	0	0	3	0	0	0	0	0	0	0	0	0	0	0	0	0	0	0	0	0	0	0	0	0	0
OTU_180	1	1	5	0	0	2	1	0	1	1	0	3	0	0	1	2	1	2	1	1	0	1	1	1	2	1	0	1	2	0	2	1	0	0	2	0	0	1	0	2	0	1	0	1	1	0	1	2	0
OTU_355	5	0	0	1	0	0	0	0	1	0	4	0	1	0	2	0	1	1	1	0	0	0	1	0	1	0	0	1	0	0	0	0	0	0	0	0	1	0	0	0	0	0	1	0	2	0	3	0	0
OTU_877	0	0	0	0	0	1	0	0	0	0	1	0	0	0	0	0	0	0	0	0	0	0	0	0	0	0	0	0	0	0	1	1	2	0	0	0	0	0	0	0	0	0	0	0	0	1	0	0	0
OTU_2294	1	0	0	0	0	0	0	0	0	0	0	0	0	0	0	0	0	0	0	0	1	0	0	0	0	0	0	0	0	0	0	0	0	0	0	0	0	0	0	0	0	0	0	0	0	0	0	0	0
OTU_2084	0	0	0	0	0	0	0	0	0	0	0	0	0	0	0	0	0	0	0	0	0	0	0	0	0	0	0	0	0	0	2	0	0	0	0	0	0	0	0	0	0	0	0	0	0	0	0	0	0
OTU_1630	0	0	1	0	0	0	0	0	0	0	0	0	0	0	0	0	0	0	0	0	0	0	0	0	0	3	0	0	0	0	0	0	1	0	0	0	0	0	0	0	0	0	0	0	0	0	0	0	0
OTU_1436	0	0	0	0	1	0	0	0	0	1	0	0	0	0	0	0	0	1	0	0	0	0	0	0	1	0	0	1	1	0	1	0	0	0	0	0	0	1	0	0	0	0	0	1	0	1	0	0	2
OTU_1568	0	1	0	0	1	0	0	0	0	0	0	0	0	0	0	0	0	1	0	1	0	0	0	0	0	0	0	0	0	0	1	1	0	1	0	0	0	0	0	1	0	0	1	0	1	0	0	0	0
OTU_1344	0	0	0	0	0	1	0	0	0	0	0	0	0	2	0	0	0	0	0	0	0	0	0	0	0	0	0	0	0	0	0	0	0	0	0	0	0	0	0	0	1	0	0	0	0	0	0	0	0
OTU_172	1	1	1	0	0	1	3	1	1	2	1	3	1	1	0	0	0	1	2	0	0	0	0	2	1	6	0	1	0	1	0	2	0	0	0	3	2	2	0	1	0	0	0	1	3	0	0	1	0
OTU_1458	0	0	0	0	0	1	0	0	1	1	0	0	0	0	0	0	0	1	0	0	0	0	0	0	0	0	0	0	0	0	0	1	0	0	0	1	0	0	0	0	0	1	0	0	0	0	1	0	1
OTU_954	0	0	0	0	0	0	0	0	0	1	0	0	0	0	1	0	0	0	0	0	0	0	0	1	0	0	1	0	0	0	0	0	0	0	0	0	0	0	0	0	0	0	0	0	0	1	0	0	0
OTU_771	2	0	1	0	0	0	0	1	2	0	0	0	1	3	3	1	1	0	2	0	2	0	5	1	3	0	0	0	0	1	3	2	0	0	2	0	0	2	3	4	4	0	1	0	0	2	0	1	2
OTU_1738	1	0	1	1	0	0	0	0	1	0	0	2	0	1	0	0	0	0	0	0	0	0	0	0	1	0	0	0	0	0	0	1	1	0	0	0	1	1	0	0	0	0	0	0	0	0	3	0	0
OTU_924	0	0	0	0	0	0	1	0	0	1	0	0	0	0	0	1	0	0	0	0	0	0	0	0	0	0	0	0	0	0	0	0	0	0	0	0	0	2	0	1	0	0	0	0	0	0	0	0	0
OTU_902	0	2	0	0	0	0	1	0	0	1	2	0	0	0	0	0	1	0	0	0	1	0	0	0	0	0	0	0	0	1	0	0	0	2	0	1	0	0	0	0	0	0	0	1	0	0	0	0	0
OTU_1820	0	0	1	1	1	0	0	0	0	0	0	0	0	0	1	0	0	0	0	0	0	0	0	0	0	0	1	0	0	0	0	0	0	0	0	0	0	0	0	0	0	0	0	0	0	0	0	0	0
OTU_1241	0	0	0	0	1	0	0	0	0	0	0	1	0	0	0	1	0	0	0	0	0	0	0	0	0	0	0	0	0	0	0	1	1	0	0	1	1	1	0	0	0	0	0	0	0	0	0	0	0
OTU_2482	0	0	0	0	0	1	0	0	0	0	0	0	0	0	0	1	0	0	0	0	1	0	0	1	0	0	0	0	0	0	0	0	0	0	4	0	2	0	0	1	0	0	0	0	0	1	0	0	0
OTU_1741	0	0	0	0	0	2	0	0	1	1	0	1	0	0	0	0	1	0	0	0	0	0	0	0	0	1	0	1	0	0	0	1	0	1	0	0	1	1	0	0	0	0	0	0	0	0	0	0	0
OTU_1260	0	1	0	0	0	3	0	0	0	0	0	0	1	1	0	0	0	0	0	0	0	0	2	0	0	1	0	0	3	0	0	1	0	0	0	0	0	1	1	1	0	0	0	0	0	0	0	1	0
OTU_960	0	0	0	0	0	0	0	1	1	0	0	0	0	0	0	0	0	0	0	0	0	0	0	0	0	0	0	0	0	0	0	0	0	0	0	0	0	0	0	0	0	1	1	0	0	0	0	0	0
OTU_572	0	1	1	1	1	1	0	0	0	0	0	0	0	0	0	0	0	0	0	1	0	0	0	0	0	0	0	0	0	0	1	0	0	0	1	0	0	1	1	0	0	0	0	2	0	0	0	0	0
OTU_1808	0	0	0	0	0	0	0	0	0	0	0	0	0	0	0	0	1	0	0	0	0	0	0	0	0	0	0	0	0	0	0	0	0	0	0	0	1	0	0	0	0	0	0	0	0	0	0	0	0
OTU_1132	0	1	0	0	2	0	0	1	0	0	3	1	0	0	0	1	0	2	0	0	1	0	0	1	1	2	0	0	0	0	0	0	0	0	7	1	0	0	0	0	1	0	0	0	2	0	0	0	0
OTU_1002	0	0	0	0	0	0	0	0	2	0	0	0	0	0	0	0	1	0	0	0	0	0	0	0	0	0	0	1	0	0	0	1	0	0	0	0	0	0	0	0	0	0	0	0	0	0	0	0	0
OTU_256	0	1	3	0	0	0	3	1	0	0	0	0	1	0	2	1	2	0	1	5	2	3	1	0	0	1	1	0	0	0	1	0	1	0	2	0	1	0	0	1	2	0	4	0	0	1	1	2	5
OTU_1926	0	0	0	0	0	0	0	0	0	0	0	0	0	0	0	0	0	0	0	0	0	0	0	0	0	0	0	0	0	0	0	0	0	0	0	0	0	1	1	0	0	0	0	0	0	0	0	0	0
OTU_856	0	0	1	0	0	0	0	0	1	0	0	1	0	0	0	0	0	1	0	0	1	2	0	0	0	0	0	0	0	1	0	0	0	0	0	0	1	0	0	0	1	0	0	0	0	0	1	0	0
OTU_646	0	0	0	1	1	0	0	0	0	0	0	0	0	0	1	0	0	0	0	0	0	0	0	0	0	0	0	0	0	0	0	0	0	0	0	0	0	0	0	0	0	1	0	0	1	0	0	0	0
OTU_1266	0	0	0	1	1	0	0	0	0	0	0	0	0	0	0	0	0	1	0	0	0	0	0	0	1	0	0	0	0	0	0	0	0	0	0	1	0	0	1	0	0	0	0	0	0	0	0	0	0
OTU_990	2	1	0	1	0	0	0	2	0	0	0	1	2	0	0	3	0	1	0	4	1	0	1	0	1	0	0	0	5	2	0	2	0	0	0	0	0	0	1	0	0	1	2	1	2	0	1	0	0
OTU_2530	0	0	0	0	0	1	0	0	0	0	0	0	0	0	1	0	0	0	0	0	0	0	0	0	0	0	0	0	1	0	0	0	0	0	0	1	0	0	0	1	0	0	0	0	0	0	0	0	0
OTU_1206	0	0	0	0	0	0	0	0	0	0	0	0	0	0	0	0	0	0	0	0	0	0	0	0	0	2	0	0	0	0	0	0	0	0	0	0	0	0	0	0	0	0	0	0	0	0	0	0	0
OTU_1090	0	1	0	0	1	0	2	0	0	0	0	0	0	0	1	0	0	0	0	0	0	1	1	0	0	0	0	0	0	1	1	0	0	0	0	0	2	0	0	1	0	0	0	0	1	1	0	1	0
OTU_1782	0	0	0	1	0	0	1	0	0	0	0	0	0	0	0	0	0	0	0	0	0	0	0	0	0	1	0	0	0	0	0	0	0	0	0	0	0	0	0	0	0	0	0	0	0	0	0	0	0
OTU_375	0	0	0	0	0	0	0	0	0	0	1	0	0	0	0	0	1	0	1	0	0	0	1	0	1	0	1	1	1	0	0	3	0	3	0	0	1	0	0	1	0	1	0	0	0	1	1	0	0
OTU_715	0	0	0	0	0	0	0	0	0	0	0	1	0	0	0	0	0	0	0	0	0	0	0	3	0	0	0	0	0	0	0	0	0	1	0	0	0	1	1	0	0	0	0	0	2	0	0	0	0
OTU_1778	0	0	0	0	0	1	0	0	0	0	0	0	0	0	0	0	1	0	0	0	0	0	0	0	0	0	0	0	0	0	0	0	0	0	0	0	0	0	1	0	0	0	0	0	1	0	0	0	2
OTU_591	0	1	0	0	0	0	0	1	1	0	0	0	0	0	0	0	0	2	0	0	0	0	0	0	1	2	1	0	0	0	0	10	0	2	0	0	0	0	0	0	0	0	0	0	0	0	0	0	0
OTU_1509	0	2	0	0	1	0	0	0	0	0	1	0	1	0	0	1	0	0	0	0	0	0	0	0	0	0	1	0	0	0	1	0	1	0	0	0	0	0	0	0	0	1	0	1	0	0	0	0	0
OTU_1203	0	0	1	0	1	1	0	0	0	0	1	0	0	1	0	0	1	0	0	0	0	0	0	0	0	1	0	0	0	0	0	0	0	2	0	0	0	1	0	0	2	0	0	0	0	0	0	0	0
OTU_198	0	0	1	3	0	0	3	0	1	0	0	2	0	0	2	1	1	2	2	1	1	0	1	0	1	2	0	0	0	0	0	2	0	0	1	1	3	0	0	1	0	0	1	1	5	0	1	0	0
OTU_1425	0	0	0	0	0	1	1	0	0	0	1	0	0	0	1	2	0	0	2	1	0	0	0	0	0	0	1	0	1	0	0	0	1	0	0	0	0	0	0	0	0	0	0	0	0	0	0	0	2
OTU_2192	0	0	0	0	0	0	0	0	0	0	0	0	0	0	0	0	0	0	0	1	0	0	0	0	0	0	0	0	0	0	0	0	0	0	0	0	0	0	0	0	0	0	0	0	0	0	0	0	0
OTU_1492	0	1	0	0	0	0	0	0	1	0	0	0	0	0	0	0	1	0	0	0	0	0	0	0	0	0	0	0	0	0	0	0	1	0	0	0	0	0	0	1	0	0	0	0	0	0	0	0	0
OTU_465	0	0	1	1	0	1	0	1	0	0	1	1	0	1	1	2	0	0	0	0	0	0	1	1	0	1	0	0	0	0	0	0	0	3	2	0	0	1	2	1	1	2	0	0	0	0	0	0	0
OTU_758	0	0	0	0	0	0	0	0	0	2	0	2	1	0	1	1	0	1	0	0	1	0	0	0	0	0	1	0	1	1	1	1	1	0	1	0	1	0	0	2	0	0	0	1	0	0	0	0	0
OTU_358	1	1	0	0	1	5	1	0	0	0	0	0	0	1	1	0	0	0	0	1	1	0	1	6	0	2	0	0	0	0	1	0	0	0	0	1	0	0	0	0	1	0	0	1	0	1	1	0	0
OTU_175	2	0	1	1	1	0	0	0	0	0	0	0	2	4	1	1	5	0	1	2	1	2	0	1	0	0	1	0	2	0	2	2	1	0	0	1	0	1	1	2	1	0	0	1	2	2	0	0	1
OTU_1393	0	0	1	0	0	0	0	1	0	0	0	0	0	0	0	0	0	0	0	1	0	0	0	0	2	0	0	1	1	0	0	0	0	1	0	0	0	0	0	0	0	0	1	0	1	0	0	0	0
OTU_2033	0	0	0	0	0	0	0	0	0	0	0	0	0	0	0	0	0	0	0	0	0	0	0	0	0	0	0	0	0	0	0	0	0	0	0	0	0	0	0	2	0	0	0	0	0	0	0	0	0
OTU_1550	0	0	1	0	0	0	1	0	0	0	0	0	0	1	1	0	0	0	0	0	0	0	0	2	0	0	0	0	1	0	0	1	0	1	0	0	0	0	1	0	0	1	0	0	0	0	1	0	0
OTU_1917	0	0	0	0	0	0	0	0	0	0	0	0	0	0	0	0	1	0	0	0	0	2	0	0	0	0	0	0	0	0	0	0	0	0	0	0	0	0	0	0	0	0	0	0	0	0	0	0	0
OTU_2053	0	0	0	0	0	0	0	0	2	0	0	0	0	0	0	0	0	0	0	0	1	0	0	0	0	0	0	0	0	0	0	0	0	0	0	0	0	2	0	0	0	1	0	0	1	0	0	1	0
OTU_1966	1	0	1	0	0	1	0	0	1	1	0	0	0	0	0	0	0	0	0	0	0	0	0	1	0	0	0	0	0	0	0	0	0	0	0	0	0	0	0	0	0	0	0	0	0	0	0	0	0
OTU_1094	0	0	0	0	0	0	0	0	1	0	0	0	0	0	0	0	0	1	0	0	0	0	0	0	0	0	0	0	0	0	0	0	0	0	1	0	0	0	0	1	0	0	0	0	0	0	1	0	0
OTU_777	0	2	0	1	1	2	1	0	1	0	1	2	0	0	0	1	1	1	0	0	0	0	0	0	0	0	0	0	5	0	0	0	0	0	0	2	0	0	1	0	0	0	0	0	2	0	1	0	0
OTU_1912	0	0	0	0	0	0	0	0	0	0	0	0	1	0	0	0	0	0	0	0	0	0	0	0	0	0	1	0	0	0	0	0	0	0	0	1	1	0	0	0	0	0	0	0	0	0	0	0	0
OTU_1524	0	0	0	0	0	0	0	0	0	0	1	0	1	0	0	0	0	0	0	0	0	0	0	0	0	0	0	0	0	0	0	0	0	0	0	0	0	0	0	1	0	0	0	0	0	0	0	0	0
OTU_811	1	1	0	1	0	0	0	0	0	0	0	0	0	0	0	0	0	0	0	0	1	0	0	0	2	0	1	1	0	0	0	0	0	0	0	2	0	1	0	0	1	0	0	0	0	0	0	0	0
OTU_2241	0	0	0	0	0	0	0	0	0	0	0	0	0	0	0	0	0	0	0	0	0	1	3	0	0	0	0	0	0	0	0	0	0	1	0	0	0	0	0	0	0	0	0	0	0	0	0	1	0
OTU_1881	0	0	0	0	0	1	0	0	0	0	0	0	0	0	0	0	0	1	0	0	0	0	0	0	0	0	0	0	0	0	0	0	2	0	0	0	0	0	0	0	0	0	0	0	0	0	2	0	0
OTU_340	1	0	1	0	1	0	3	1	1	0	0	0	0	1	1	1	0	1	0	0	1	0	0	1	1	0	0	2	0	0	1	0	1	0	0	2	0	0	2	1	0	1	1	1	1	1	1	0	0
OTU_1889	0	0	0	0	0	0	0	0	0	1	1	0	0	0	0	0	0	0	0	0	0	0	0	0	0	0	0	0	0	0	0	0	0	0	0	0	0	0	0	0	0	0	0	0	0	0	0	0	0
OTU_1661	0	0	0	0	0	0	0	0	0	0	0	1	0	0	0	0	0	0	0	0	0	1	0	0	0	0	0	0	0	0	0	0	0	0	0	0	0	0	0	0	0	0	0	0	0	0	0	0	0
OTU_1673	1	1	0	0	0	0	0	0	0	0	0	0	0	0	0	0	0	0	0	0	0	0	2	0	0	1	0	0	0	0	0	1	0	0	0	0	0	0	0	0	0	0	0	0	0	0	0	0	0
OTU_1918	0	0	0	0	0	0	0	0	0	0	0	0	0	0	0	0	0	0	0	0	0	0	1	0	0	0	0	0	0	0	0	1	1	0	0	0	0	0	0	0	2	0	0	0	0	0	0	0	0
OTU_1809	0	0	0	0	0	0	0	1	1	1	0	0	0	0	0	0	0	0	0	0	0	0	0	0	0	0	0	1	1	0	0	0	0	0	0	2	0	0	0	1	0	0	0	0	0	0	0	0	0
OTU_2222	0	0	0	0	0	0	0	0	0	0	0	0	0	0	0	0	0	0	0	1	0	0	0	0	0	0	0	0	0	0	0	0	0	0	0	0	0	0	0	0	0	0	0	0	0	0	1	0	0
OTU_1036	0	0	0	0	0	0	0	0	0	1	0	0	0	0	0	0	0	0	0	1	0	1	0	0	0	0	0	0	0	0	1	0	0	0	0	1	0	0	2	0	0	0	0	0	0	0	0	1	0
OTU_1585	2	0	0	0	0	0	0	0	0	0	0	0	0	0	0	0	0	0	0	0	0	0	0	0	0	0	0	0	2	0	0	0	0	0	0	0	0	0	0	0	2	0	0	0	0	0	0	1	0
OTU_1315	0	0	0	0	0	0	1	0	1	0	0	0	0	0	0	0	0	0	0	0	0	0	0	0	0	0	0	0	0	0	0	0	0	0	0	1	0	0	0	0	0	0	0	0	0	0	0	0	0
OTU_1276	1	0	0	0	2	1	0	0	0	0	0	1	0	0	0	0	0	0	0	0	0	0	0	0	0	0	0	0	0	0	0	0	0	0	0	0	0	1	0	1	0	0	0	0	0	1	1	0	0
OTU_2216	0	0	1	1	0	0	0	0	0	0	0	0	0	0	0	3	0	0	0	0	0	0	1	0	0	0	0	0	0	0	0	0	0	0	0	0	0	0	1	0	0	0	0	0	0	0	0	0	0
OTU_635	0	0	0	0	1	0	0	1	0	0	1	0	1	0	0	0	0	0	0	0	0	1	0	0	0	0	0	0	0	0	0	3	1	0	0	0	0	0	0	0	1	0	0	0	0	0	0	0	1
OTU_808	0	0	0	0	0	0	0	0	0	0	0	0	0	0	0	0	0	0	0	0	0	0	0	0	0	0	0	0	0	0	0	0	0	0	3	0	0	0	0	0	0	0	0	0	0	0	0	0	0
OTU_1242	0	0	0	0	1	0	0	0	1	0	0	0	0	0	0	0	0	0	0	0	0	0	0	0	0	0	0	0	0	0	0	0	0	0	0	0	0	0	0	0	0	0	0	0	0	1	0	0	0
OTU_2093	0	0	0	0	0	0	0	0	0	0	0	0	0	0	0	0	0	0	0	0	0	0	0	0	0	0	0	0	0	0	0	0	1	0	0	0	0	0	0	2	0	0	0	0	0	0	0	0	0
OTU_1871	0	0	0	0	0	0	0	0	0	1	0	0	0	0	1	0	0	0	0	0	0	0	0	0	0	0	0	0	0	0	0	0	0	0	0	0	0	0	0	0	0	0	0	0	0	0	0	0	0
OTU_1483	0	0	0	0	0	0	0	0	0	0	0	0	0	0	0	0	0	0	7	0	0	0	0	0	0	0	0	0	0	0	1	0	0	1	0	0	0	0	0	0	0	0	0	1	0	0	0	1	0
OTU_122	1	0	0	2	4	1	4	1	1	1	5	2	0	0	0	0	0	1	0	0	0	0	2	0	2	1	0	3	1	0	0	1	1	0	2	1	2	1	1	3	0	0	0	1	1	0	1	0	0
OTU_1486	0	1	0	0	0	0	0	0	0	0	0	0	0	1	0	3	1	0	1	0	0	1	0	0	0	1	1	0	0	0	0	0	0	0	0	1	0	1	0	0	0	0	0	0	1	1	0	0	0
OTU_912	0	0	0	0	0	0	0	2	0	0	0	0	0	1	0	0	1	0	0	0	0	0	0	0	0	0	0	0	0	0	0	0	0	0	2	0	0	0	0	0	1	0	0	0	0	0	0	1	0
OTU_439	1	0	2	0	0	0	1	0	0	0	0	0	0	1	1	0	1	0	1	0	0	0	0	1	2	0	7	0	0	0	1	0	1	0	0	0	0	0	3	2	0	5	1	1	0	0	0	0	0
OTU_1016	0	0	1	0	0	0	0	0	0	0	0	0	0	0	0	1	0	0	3	0	0	0	0	0	0	0	1	0	0	0	0	0	0	0	0	0	0	0	0	0	0	0	0	0	0	0	0	0	1
OTU_1275	0	1	0	1	0	0	1	0	0	0	0	0	0	0	0	1	1	0	0	0	0	0	0	0	0	2	1	0	0	0	0	1	0	0	0	0	0	0	0	0	0	0	0	1	0	0	0	0	0
OTU_620	0	1	0	0	0	0	0	0	0	1	0	0	1	0	0	0	0	0	0	1	1	0	0	0	2	1	0	0	0	0	0	0	0	0	0	0	1	0	0	0	0	0	0	0	0	0	1	0	0
OTU_975	0	0	0	0	0	0	0	0	0	0	0	0	0	0	0	0	0	0	0	0	0	0	0	1	0	1	0	0	0	0	0	0	0	0	0	0	0	0	1	0	0	0	0	0	0	0	0	0	0
OTU_818	0	0	0	0	0	0	3	1	0	2	0	0	0	1	1	0	1	0	1	0	2	1	3	0	0	1	0	0	1	1	0	1	0	0	0	0	0	0	0	0	1	3	0	0	0	2	3	0	1
OTU_1633	0	0	0	0	0	0	0	0	0	0	0	0	0	0	0	0	0	0	0	0	0	0	0	0	0	0	0	0	0	0	0	0	0	0	0	0	1	0	1	0	0	0	0	0	0	0	0	0	0
OTU_1289	0	0	0	0	0	1	0	0	0	0	0	0	0	0	0	0	0	0	0	0	0	0	0	0	0	0	0	0	0	0	0	0	0	0	0	0	0	0	0	0	0	0	0	0	0	0	0	0	0
OTU_608	5	1	1	2	1	1	0	0	0	1	0	0	0	1	2	2	0	0	0	2	1	0	0	0	0	0	1	1	1	2	4	0	1	0	0	1	1	0	0	1	0	0	2	3	1	1	1	0	0
OTU_1110	0	2	0	0	0	0	0	2	0	0	0	0	0	0	1	0	0	2	0	0	0	0	1	0	0	0	0	0	1	0	0	0	0	1	0	1	0	0	0	0	1	1	0	0	0	0	0	0	0
OTU_854	1	2	2	2	0	1	1	0	2	3	0	3	0	1	3	1	1	2	1	1	0	0	4	2	1	3	3	1	0	3	0	4	1	1	0	2	2	1	1	1	3	3	0	1	0	1	2	0	0
OTU_2495	0	1	0	1	0	0	0	0	0	0	0	0	1	0	0	0	0	0	0	1	0	0	0	0	0	0	0	0	0	0	0	0	0	1	0	1	0	0	0	0	0	0	0	0	0	0	0	0	0
OTU_1429	0	0	0	2	0	0	0	0	0	0	0	0	0	1	0	0	0	0	0	0	0	0	0	0	0	0	0	0	0	0	0	0	0	0	0	0	0	0	0	0	1	0	0	0	1	0	0	0	1
OTU_1277	0	1	0	0	1	0	1	0	0	0	0	0	1	0	0	0	0	3	0	0	0	1	0	0	0	2	0	0	0	0	0	0	0	0	0	0	0	0	0	0	0	0	0	0	0	1	0	0	0
OTU_817	0	0	0	0	0	0	0	1	0	0	0	0	0	0	1	1	0	0	0	0	0	0	0	0	0	0	0	1	0	0	0	0	1	0	0	0	0	0	0	0	0	1	1	0	0	0	0	0	0
OTU_1968	0	0	0	0	0	0	0	0	0	0	0	0	0	0	0	0	0	0	0	0	0	0	0	0	0	0	0	0	0	0	0	0	0	0	0	0	0	0	0	0	0	0	0	0	0	0	0	0	0
OTU_1518	0	0	0	0	1	0	0	0	0	0	0	0	0	0	0	0	0	0	0	0	0	0	0	0	0	0	0	0	0	0	1	0	0	0	0	0	0	0	0	0	0	1	0	1	0	0	0	0	0
OTU_2016	0	0	0	0	0	0	0	0	0	0	0	0	0	0	0	1	0	0	0	0	0	0	0	0	0	0	0	0	2	0	0	0	0	0	0	0	0	0	0	0	0	0	0	0	0	0	0	0	0
OTU_1076	0	0	0	0	1	0	0	0	0	1	0	0	2	0	0	1	0	0	0	0	2	0	0	2	0	4	0	1	0	0	0	1	0	0	0	0	0	0	1	0	1	0	0	0	3	0	0	0	0
OTU_337	0	0	1	2	0	0	2	0	0	0	0	0	0	0	0	0	0	0	0	0	0	0	0	0	0	2	0	0	0	0	0	0	0	0	0	0	0	0	0	0	0	0	0	0	0	0	0	1	0
OTU_2074	0	0	0	0	0	0	0	0	0	0	0	0	0	0	0	0	0	0	0	0	0	0	0	0	0	0	0	0	0	0	0	0	0	0	0	0	0	0	0	0	0	0	0	0	0	0	0	0	0
OTU_664	0	0	0	0	1	0	0	0	0	0	0	0	0	1	0	0	0	0	0	0	0	0	0	0	0	0	0	0	0	0	0	1	0	0	0	0	0	0	0	1	0	0	0	1	0	0	0	1	0
OTU_634	0	0	1	0	0	0	0	0	0	0	0	0	0	0	0	0	0	0	0	0	0	0	0	0	0	0	0	0	0	0	0	0	0	1	0	0	0	0	7	1	0	1	0	0	0	0	0	0	0
OTU_958	0	0	0	1	0	0	0	0	0	0	0	0	0	0	0	1	0	0	0	0	1	1	0	0	0	0	0	0	0	0	1	1	0	1	0	0	0	1	0	1	1	0	0	0	0	0	0	0	0
OTU_1249	0	4	0	0	0	0	0	0	0	0	0	0	0	0	2	0	0	1	1	0	0	0	0	1	0	1	0	0	1	0	0	0	1	0	0	0	0	0	0	0	0	1	0	0	1	1	0	0	0
OTU_1545	0	0	2	0	1	0	0	0	0	0	0	0	1	0	0	0	0	0	0	0	0	0	0	0	0	0	0	0	0	0	0	0	0	0	0	0	0	0	0	0	0	0	0	0	0	0	0	0	0
OTU_403	0	1	0	0	0	1	0	5	0	1	1	0	0	0	1	0	1	1	0	0	2	2	2	0	1	0	0	0	1	0	3	1	2	0	2	1	0	0	0	1	0	0	1	0	1	1	0	0	1
OTU_1204	0	0	0	0	0	1	0	0	0	0	0	2	0	0	0	0	0	0	0	0	0	0	0	0	0	0	0	0	0	0	0	0	0	0	0	0	0	0	1	0	0	0	0	0	0	0	0	0	0
OTU_2086	0	0	0	0	0	0	0	0	0	0	0	0	0	0	0	0	0	0	0	0	0	0	0	0	0	0	0	0	0	0	0	0	0	0	0	0	0	0	0	0	0	0	0	0	0	0	0	0	0
OTU_483	1	2	3	0	0	0	0	2	3	0	0	0	0	0	0	1	0	0	0	1	1	1	0	0	0	0	0	0	2	0	0	2	0	0	0	0	1	0	0	0	0	0	0	0	0	1	0	0	0
OTU_2211	0	0	0	0	0	0	0	0	0	0	0	0	0	0	0	0	0	0	0	0	0	0	0	0	0	0	0	0	0	0	0	0	0	0	0	0	0	0	0	1	0	0	0	0	0	0	0	0	0
OTU_765	0	0	1	0	0	0	0	0	0	0	0	0	0	1	0	0	0	0	0	0	0	0	0	0	0	0	1	0	0	0	0	0	0	0	0	0	0	0	0	0	0	1	0	0	0	0	0	0	2
OTU_881	0	0	0	0	1	0	0	0	1	0	0	1	0	0	0	0	1	0	0	0	0	0	0	0	0	0	0	0	0	0	0	0	0	1	0	0	0	0	0	0	0	0	0	0	0	0	0	0	0
OTU_2119	0	0	0	0	0	0	0	0	0	0	0	0	0	0	0	1	0	0	0	0	0	0	0	0	0	0	0	0	0	0	0	0	0	0	0	0	0	0	0	0	0	0	0	0	0	0	0	0	0
OTU_1391	0	1	0	0	0	0	0	0	0	1	0	0	0	0	0	0	0	0	0	0	0	0	0	0	2	0	1	0	0	0	0	0	0	0	0	0	0	0	0	0	0	0	0	0	0	0	0	0	1
OTU_1427	0	0	0	0	0	0	0	1	0	0	0	0	0	0	0	0	2	0	0	0	0	0	0	0	1	0	0	0	0	0	0	0	0	0	1	0	0	0	0	0	0	0	1	0	1	0	0	0	0
OTU_1703	0	0	2	0	0	0	1	1	1	0	1	0	1	0	1	0	2	2	0	0	1	0	0	0	1	0	1	0	2	0	0	0	0	0	1	0	0	2	1	1	0	0	0	0	0	1	0	1	1
OTU_1428	0	1	1	0	0	0	0	0	0	0	0	0	0	2	1	1	0	0	2	1	0	4	0	0	1	0	1	0	0	0	0	1	0	0	0	0	0	0	0	2	1	1	0	0	1	0	0	0	0
OTU_1082	0	0	0	0	0	2	0	0	0	0	0	0	0	0	0	0	0	0	0	0	0	0	0	1	0	0	0	0	0	0	0	0	0	0	0	0	0	0	0	0	0	0	0	1	0	0	0	0	0
OTU_1229	0	0	0	1	0	0	2	0	1	0	0	0	0	0	0	0	1	0	0	0	0	0	0	0	1	0	0	0	1	1	0	0	0	1	0	0	1	0	2	0	0	0	0	1	0	0	1	0	0
OTU_1482	0	0	0	0	0	0	0	0	0	0	0	0	2	1	0	0	0	0	0	0	0	0	0	0	1	0	0	0	0	2	0	0	0	0	1	1	0	2	0	0	0	0	0	0	1	0	1	0	0
OTU_1995	0	0	0	0	0	0	0	0	0	0	0	0	0	1	0	0	1	0	1	0	0	0	0	0	0	0	0	0	0	0	0	0	0	0	1	0	0	0	0	1	0	0	0	0	0	0	0	0	0
OTU_1922	0	0	0	0	0	0	2	1	1	0	0	1	0	1	0	0	0	0	0	0	0	0	0	0	0	0	1	0	0	1	0	0	0	0	0	0	0	0	0	0	0	0	0	0	0	1	0	0	0
OTU_2364	3	2	0	0	0	2	1	0	0	1	0	2	0	0	2	0	0	0	1	1	1	0	1	0	2	1	0	0	0	0	0	2	0	2	0	0	0	0	0	1	0	1	1	0	0	0	1	0	0
OTU_282	0	0	0	0	2	0	1	0	0	0	0	1	0	0	0	0	0	0	0	0	0	0	0	0	0	0	0	0	1	0	0	0	0	0	0	0	0	0	0	0	0	0	0	1	0	1	0	0	0
OTU_1795	0	0	0	0	0	0	0	0	1	0	0	1	0	0	0	0	0	0	0	0	0	0	0	0	0	0	0	0	0	0	0	0	0	0	0	0	0	0	0	0	0	0	0	0	0	0	0	0	0
OTU_432	0	0	0	0	2	1	0	0	0	0	1	0	1	0	0	0	1	0	0	0	1	0	0	0	0	0	0	0	0	0	0	0	0	0	0	0	0	0	0	1	0	0	1	0	3	2	0	2	0
OTU_425	1	2	1	0	0	0	1	0	0	0	0	2	0	0	3	0	0	0	0	0	0	0	1	1	0	1	0	0	1	0	0	3	0	0	0	0	1	0	1	0	0	0	0	3	0	0	1	0	0
OTU_1663	0	0	0	0	0	0	1	1	0	0	2	0	0	1	0	2	0	0	0	0	1	0	0	0	1	1	0	0	0	0	0	0	0	0	0	0	0	1	1	0	0	0	0	0	0	0	0	0	0
OTU_1337	1	0	1	0	0	0	0	0	0	0	0	0	0	0	0	0	0	0	0	0	0	0	0	1	0	0	0	0	0	0	0	0	0	0	0	0	0	0	0	0	0	0	0	0	0	0	0	1	0
OTU_922	0	0	0	0	0	0	0	0	0	0	0	0	0	0	0	4	0	0	0	0	0	0	1	0	1	0	0	0	0	0	0	1	0	0	0	0	0	2	1	0	0	0	0	0	1	0	0	0	0
OTU_897	0	0	0	0	0	0	0	0	1	0	0	3	0	0	1	0	0	1	0	0	0	0	0	1	0	0	0	0	0	0	0	0	0	0	0	0	0	0	1	1	0	0	0	0	0	0	1	0	0
OTU_1079	0	0	0	1	0	0	0	0	0	0	0	0	0	0	0	0	0	0	1	0	0	0	0	0	0	0	0	0	0	0	0	0	0	0	0	0	0	0	0	0	0	0	0	0	0	0	0	0	0
OTU_1589	0	0	0	0	2	0	0	0	0	0	0	2	0	0	0	0	0	0	1	0	0	0	1	0	0	0	0	0	0	0	4	0	2	0	0	0	0	0	0	0	0	0	0	0	0	0	0	0	0
OTU_1731	1	1	1	0	0	0	0	0	0	0	0	0	1	0	0	0	1	0	0	0	0	0	0	0	1	0	1	0	0	0	0	0	0	0	0	0	0	0	0	0	0	0	0	0	0	0	0	0	1
OTU_485	0	0	1	0	0	1	0	0	0	2	0	0	1	1	1	0	0	0	0	0	1	1	1	1	0	0	0	0	0	1	0	0	2	0	0	0	0	0	0	0	0	0	0	0	0	0	1	0	0
OTU_1699	1	0	0	0	0	0	0	0	0	0	0	0	0	0	0	0	0	0	0	0	0	0	0	0	1	0	0	0	0	0	0	0	0	0	0	0	0	0	0	0	0	0	0	0	0	0	0	0	0
OTU_450	0	1	1	0	0	0	0	0	1	0	0	0	5	1	0	1	1	0	1	3	0	3	1	0	0	0	2	0	0	0	1	0	0	0	5	0	0	0	2	0	1	0	0	0	0	0	0	1	2
OTU_2027	0	0	0	4	1	0	0	0	0	2	0	0	0	0	0	0	0	0	0	0	0	0	0	0	1	0	0	0	0	0	0	0	0	1	0	0	0	0	0	0	0	0	0	0	1	0	0	0	0
OTU_1921	0	0	0	0	0	0	0	0	0	0	0	0	0	0	0	0	0	0	0	0	0	0	0	0	0	0	0	0	0	0	0	0	0	0	0	1	0	0	0	0	0	0	0	0	0	0	0	0	0
OTU_2449	0	0	0	1	0	0	0	0	0	0	0	0	0	0	0	0	0	0	0	0	0	0	0	0	0	0	0	0	0	0	0	0	0	0	0	0	0	0	0	0	0	1	0	0	0	0	0	0	0
OTU_1656	0	0	2	0	0	0	1	0	0	2	0	0	0	0	0	0	0	1	0	1	0	0	1	0	0	0	0	0	0	1	0	0	0	0	0	0	0	0	0	0	0	0	0	0	0	0	0	0	1
OTU_654	1	1	0	1	2	0	0	0	0	1	0	0	0	0	0	0	0	0	1	0	0	0	1	0	1	2	0	0	0	0	0	1	0	0	0	0	0	1	0	1	0	0	0	0	0	0	0	0	0
OTU_1152	0	0	0	0	0	0	0	0	0	0	0	0	0	0	0	0	0	0	0	0	0	0	0	0	0	1	0	0	0	1	0	0	0	1	0	1	2	1	0	0	0	0	0	0	0	0	0	1	0
OTU_907	0	0	0	2	0	0	0	0	0	0	0	0	0	0	0	0	0	0	0	0	0	0	0	0	0	0	0	0	0	0	0	0	0	0	0	0	0	1	0	0	0	0	0	1	0	1	0	0	0
OTU_2558	0	1	0	0	0	0	0	0	0	0	0	0	0	0	0	0	0	0	0	0	0	0	0	0	0	0	0	0	0	0	0	0	0	0	0	0	0	0	0	0	0	0	0	0	0	0	0	0	0
OTU_583	0	1	0	0	0	0	0	1	0	0	0	0	0	0	0	0	1	0	0	0	0	0	0	0	0	0	0	0	6	0	0	0	0	0	0	0	0	0	0	1	0	0	2	0	0	0	3	0	0
OTU_1984	0	0	0	0	0	0	0	0	0	0	0	0	0	0	0	1	0	0	0	1	2	0	0	0	0	1	1	0	2	1	0	2	0	0	0	0	0	1	1	0	0	0	0	0	0	0	0	1	0
OTU_1709	0	1	0	0	0	0	5	0	0	0	1	0	0	1	1	0	3	2	0	0	0	2	1	1	1	1	1	0	0	1	0	3	0	0	1	1	4	1	0	1	0	0	0	1	1	1	0	0	0
OTU_2028	0	0	0	0	0	0	0	0	0	0	0	0	0	0	0	0	0	0	0	0	0	0	0	0	0	0	0	0	0	0	0	0	0	0	0	0	0	0	0	0	0	0	0	0	0	0	0	0	0
OTU_409	1	1	0	0	1	0	0	2	0	0	0	0	1	0	0	1	0	0	0	1	0	0	0	0	2	1	0	0	0	1	1	0	1	0	0	0	1	1	0	0	0	0	1	1	0	0	0	0	0
OTU_2017	0	0	0	0	0	0	0	0	0	0	0	0	0	0	0	0	0	0	0	0	0	0	0	0	0	1	0	0	0	0	0	0	0	0	0	0	0	0	0	0	0	0	0	0	0	0	0	0	0
OTU_1936	0	0	0	0	0	0	0	0	0	0	0	2	1	0	0	0	0	0	0	0	0	0	0	0	0	0	0	0	0	2	0	0	0	1	0	0	0	0	0	2	0	0	0	0	1	0	0	0	0
OTU_2151	0	0	0	0	0	1	0	0	1	0	0	0	0	0	0	0	0	0	1	0	0	0	0	0	0	0	0	0	0	0	0	0	0	0	0	0	0	0	0	0	0	0	0	0	0	0	0	0	0
OTU_2553	0	0	0	0	0	0	0	0	0	0	0	0	0	1	0	0	0	0	0	0	0	0	0	0	0	0	0	0	0	0	0	0	0	0	0	0	0	0	0	0	0	0	0	1	0	1	0	0	0
OTU_1901	0	0	0	0	0	0	0	0	0	2	2	0	0	0	0	0	0	0	0	0	0	0	1	0	0	1	0	0	0	0	0	0	0	0	0	0	0	0	0	0	0	0	0	0	0	0	0	0	0
OTU_1155	0	1	0	0	1	4	0	0	0	0	0	4	0	0	0	0	0	1	0	0	0	0	0	1	0	1	0	0	0	1	0	0	0	0	0	0	0	0	0	0	0	1	0	0	0	0	0	0	0
OTU_2286	0	0	0	0	0	0	0	0	0	0	0	0	0	0	0	0	0	0	0	0	0	0	0	1	1	0	0	0	0	1	0	0	0	0	0	0	0	1	0	0	0	0	0	0	0	0	0	0	0
OTU_1159	0	0	0	0	0	3	0	1	0	0	0	0	1	0	0	0	0	0	0	0	0	0	1	0	0	0	0	0	0	0	1	0	0	0	0	0	1	0	0	1	0	1	0	0	0	0	0	0	1
OTU_1017	0	0	0	0	0	0	0	1	0	0	0	1	2	0	0	0	0	0	0	0	0	0	0	0	0	0	0	0	0	0	0	0	0	0	1	0	1	0	1	0	0	0	0	0	0	2	1	0	0
OTU_1504	0	0	0	1	0	0	0	1	0	1	0	0	0	0	0	0	0	0	0	1	0	0	0	0	0	0	1	1	0	0	1	0	0	0	1	0	1	0	0	1	0	0	0	0	0	0	0	0	0
OTU_1503	0	0	0	0	0	0	0	0	0	0	0	0	0	0	0	0	0	0	0	0	0	0	0	0	0	0	0	0	0	0	0	0	0	0	0	0	0	0	0	0	0	0	0	0	0	0	0	0	1
OTU_2528	1	0	3	2	0	1	0	0	0	1	0	3	0	0	0	0	0	0	0	0	0	0	0	2	0	0	0	1	0	2	0	0	0	0	0	0	0	2	0	0	0	0	0	0	0	0	0	0	2
OTU_1943	0	0	0	0	0	0	0	0	0	0	0	0	0	0	0	0	1	0	0	0	0	3	0	0	0	0	0	0	0	1	1	0	0	0	0	0	0	0	0	0	1	0	1	0	0	0	0	0	0
OTU_1037	1	0	0	1	1	1	0	1	0	0	0	0	0	0	0	0	0	1	0	0	0	0	1	0	0	0	1	1	0	0	0	0	1	0	0	0	0	0	0	0	1	0	0	0	0	1	0	0	0
OTU_1019	0	0	0	2	0	0	0	0	3	0	0	0	0	0	1	1	0	0	0	0	0	0	0	0	0	0	0	0	0	0	0	0	0	0	0	0	1	0	1	0	0	0	0	0	0	0	0	0	0
OTU_1803	0	4	0	0	0	1	0	2	0	0	0	0	0	0	0	0	0	3	1	0	0	0	1	0	0	0	0	0	0	0	0	0	0	0	0	0	0	0	0	0	0	1	0	0	0	2	0	0	0
OTU_1181	0	0	0	0	0	0	0	0	0	0	0	0	0	0	0	0	0	0	0	0	0	0	0	0	0	0	0	0	0	0	0	0	0	0	0	0	0	0	0	1	0	1	0	0	0	0	7	0	0
OTU_1224	0	0	0	0	0	2	0	0	1	0	0	0	1	1	0	0	0	0	0	0	0	0	0	0	0	0	0	0	0	0	0	0	0	0	0	0	0	0	0	0	0	0	0	0	2	0	0	0	0
OTU_1233	0	0	1	0	0	0	0	0	0	0	0	0	0	1	0	1	0	0	0	0	0	0	0	1	0	1	0	0	0	0	0	0	0	0	0	0	0	1	1	0	0	0	0	1	1	0	0	0	0
OTU_1176	0	0	0	0	0	0	0	0	0	0	0	1	2	0	0	0	0	0	0	1	0	1	0	0	0	0	0	0	0	0	0	0	0	0	0	0	1	0	0	0	1	0	0	0	0	0	0	0	0
OTU_887	0	2	2	0	0	0	0	1	0	0	2	0	1	0	0	0	0	0	1	0	3	1	0	0	0	0	0	0	1	0	1	0	2	0	0	0	0	0	0	0	1	0	2	0	1	0	0	0	1
OTU_601	0	0	1	0	0	0	0	0	1	0	0	0	0	0	0	0	0	2	0	0	0	0	0	0	0	0	0	0	0	0	0	1	0	0	2	0	0	0	0	0	2	0	0	0	0	0	0	0	0
OTU_1330	0	0	0	1	0	1	0	0	0	0	0	0	0	0	0	0	0	0	1	0	0	0	0	0	0	0	1	0	0	0	0	0	0	0	0	0	0	0	1	0	0	0	0	0	0	0	0	0	0
OTU_665	0	0	0	0	3	0	0	0	0	0	0	0	1	0	0	0	0	0	0	0	0	0	0	2	0	0	0	0	0	1	2	0	1	0	0	0	1	0	0	0	0	0	0	0	2	0	0	0	0
OTU_400	0	0	1	0	2	2	1	0	0	0	0	0	1	0	0	1	0	0	2	3	0	0	0	0	0	2	0	1	0	0	0	0	2	0	2	0	1	2	0	0	0	1	0	0	1	0	0	1	0
OTU_1025	0	0	0	0	0	0	0	0	0	0	0	0	0	0	0	1	0	0	0	0	0	1	0	0	0	0	0	0	0	0	0	0	0	0	0	0	0	0	0	1	0	0	0	0	0	0	0	0	0
OTU_2424	0	0	0	1	0	0	0	0	0	0	1	0	0	0	0	0	0	1	0	0	0	1	0	1	1	0	0	0	0	0	0	2	1	0	0	1	0	0	0	0	0	0	0	1	0	0	0	2	0
OTU_2176	1	0	0	0	0	0	0	0	1	0	0	0	0	0	0	3	2	0	0	0	0	0	0	0	1	0	0	1	0	0	0	0	0	0	0	0	0	0	0	1	0	0	0	0	0	0	0	1	0
OTU_1700	0	0	0	0	1	0	0	0	0	0	0	0	0	0	0	0	1	0	0	0	0	0	0	0	0	0	0	0	1	0	0	0	0	1	0	0	0	0	0	0	0	0	0	0	0	0	0	0	0
OTU_2024	0	0	0	0	0	0	0	0	0	0	0	0	0	0	0	0	0	0	0	0	0	0	0	0	0	0	0	0	0	0	0	0	0	0	0	0	0	0	1	0	0	0	0	0	0	0	0	0	0
OTU_484	0	0	0	0	2	0	2	0	1	1	1	0	0	3	0	1	0	0	0	0	0	0	1	1	2	0	0	1	1	1	1	1	0	0	0	0	0	2	0	0	1	0	1	0	0	0	0	1	0
OTU_753	0	0	0	0	1	0	1	0	0	0	0	0	0	0	0	0	0	0	1	0	0	0	0	0	0	0	1	0	0	0	0	0	0	0	0	0	0	0	0	0	1	0	6	0	0	0	0	0	0
OTU_1210	0	0	0	0	0	0	1	0	0	0	1	1	0	1	0	0	0	0	0	0	0	0	0	0	0	0	0	1	0	0	0	0	0	1	0	0	0	1	0	0	0	0	0	0	0	1	0	0	0
OTU_402	0	1	1	2	0	1	0	0	1	1	0	1	2	2	1	0	0	0	1	3	5	1	0	0	1	1	3	1	3	0	2	0	1	0	2	1	1	1	1	2	0	0	0	0	0	0	0	1	0
OTU_1652	0	0	0	0	0	1	0	1	0	0	0	0	0	0	0	0	0	0	0	0	0	0	0	0	0	0	0	0	1	0	0	0	0	0	0	0	0	0	0	0	0	0	0	0	0	0	0	0	0
OTU_971	1	0	0	0	0	0	1	0	0	0	1	0	0	1	0	0	1	1	0	0	0	0	2	0	1	0	1	0	0	0	0	0	1	0	0	0	0	0	1	1	0	1	0	0	0	0	0	1	0
OTU_1875	0	0	2	0	0	0	1	0	0	0	0	1	0	0	0	0	1	0	0	0	0	0	0	1	0	2	0	0	1	0	0	0	0	0	0	0	0	0	0	1	0	3	0	0	0	0	0	0	0
OTU_2430	0	1	0	0	0	0	0	0	0	0	0	0	0	0	0	0	0	0	0	0	0	0	9	0	2	1	0	0	0	0	0	2	0	1	0	1	0	0	0	1	1	0	0	1	1	0	1	0	0
OTU_2380	0	0	0	0	0	0	0	0	0	0	0	0	1	0	0	0	0	0	0	1	1	0	0	0	0	0	0	0	0	0	0	0	0	0	0	0	0	0	0	0	0	0	0	0	0	0	0	0	0
OTU_1246	0	0	1	0	0	0	0	0	0	0	0	0	0	0	0	2	0	0	1	0	0	0	0	0	0	0	0	0	0	0	0	0	0	0	1	0	0	0	0	0	1	0	0	0	0	0	0	0	1
OTU_1116	1	0	0	0	0	0	0	0	0	0	0	0	0	1	0	0	0	0	0	0	0	0	1	0	0	1	0	1	0	4	0	1	0	0	0	0	1	2	1	0	0	0	0	1	0	0	0	0	0
OTU_2047	0	0	0	1	1	1	0	0	0	0	0	0	0	0	0	0	0	0	0	0	0	0	0	0	0	0	0	0	0	0	0	0	0	0	0	0	0	0	0	0	0	0	0	0	0	0	0	0	0
OTU_1927	0	0	0	0	0	0	0	0	0	0	0	0	0	0	0	0	0	0	0	0	0	0	0	0	0	0	0	0	0	0	0	0	0	0	0	0	0	0	0	0	0	0	0	0	0	0	0	0	0
OTU_1792	0	0	0	1	0	0	0	0	0	0	0	1	0	0	0	0	0	0	0	0	0	0	0	0	0	0	0	0	0	0	0	0	0	0	0	0	0	0	0	0	0	0	0	0	0	0	0	0	0
OTU_1178	0	0	0	0	0	0	0	0	0	0	0	0	0	0	0	0	1	0	0	0	0	0	0	0	0	0	0	0	1	0	0	0	0	0	0	0	0	0	2	0	0	0	0	0	0	0	0	0	0
OTU_1258	0	1	0	0	0	0	0	1	0	0	0	0	0	0	0	0	1	0	0	0	0	0	0	0	0	0	1	0	1	0	0	0	0	0	0	0	0	0	0	0	0	0	1	0	0	0	0	5	1
OTU_1844	0	0	0	2	0	0	0	0	0	0	0	0	0	0	0	0	0	0	0	0	0	0	0	0	0	0	0	0	0	1	0	0	0	0	0	0	0	0	0	0	0	0	0	0	0	0	0	0	0
OTU_2547	0	0	0	0	0	0	0	0	0	0	1	0	0	0	0	0	0	0	1	0	0	0	0	0	0	0	0	0	0	0	0	0	1	0	0	0	1	0	0	0	0	0	0	0	0	0	0	1	0
OTU_1985	0	0	0	1	1	0	0	0	0	0	0	1	0	0	0	0	0	0	0	0	0	0	0	0	2	0	0	0	0	0	0	0	0	0	0	0	1	0	1	0	0	0	0	0	1	0	0	0	0
OTU_945	0	0	0	0	0	1	0	0	1	1	0	0	0	0	0	0	0	0	0	0	0	0	0	0	2	0	0	0	0	0	0	0	0	1	0	0	0	0	0	1	0	2	0	0	0	0	0	0	0
OTU_1060	1	0	0	0	0	1	0	0	0	2	0	1	0	0	0	0	0	1	0	0	0	0	0	0	0	2	0	0	1	2	0	0	0	1	0	1	0	0	0	0	0	0	0	0	0	0	0	0	0
OTU_1075	0	0	0	0	0	0	0	0	0	1	0	0	0	0	0	0	0	0	0	0	0	0	0	1	0	0	0	1	0	1	1	0	0	0	0	0	0	1	0	0	0	0	0	0	0	0	0	0	0
OTU_773	0	0	0	0	0	0	0	0	0	0	0	0	0	0	0	1	1	0	0	0	0	0	0	0	0	0	0	0	0	0	0	0	0	0	1	1	1	0	0	0	0	0	0	0	0	0	0	0	0
OTU_1982	0	0	0	0	0	1	0	0	0	0	0	0	0	0	0	0	0	0	0	0	0	0	0	0	0	0	0	0	0	0	0	0	0	0	0	0	0	0	0	0	0	0	0	0	0	0	0	0	1
OTU_2562	0	0	0	0	0	0	0	0	0	0	1	0	0	0	0	0	0	0	0	0	0	0	0	0	0	0	0	0	0	0	0	0	1	0	0	0	0	0	0	0	0	0	0	0	0	0	0	0	0
OTU_1934	1	0	1	1	0	0	0	0	0	0	0	0	1	0	0	0	0	0	1	0	0	0	0	0	0	0	0	1	0	0	0	0	0	0	0	1	0	0	0	0	0	0	0	1	0	0	0	0	0
OTU_387	0	0	0	0	0	1	1	5	0	4	0	0	0	0	1	0	0	0	0	0	1	0	0	0	0	0	0	1	0	1	0	1	3	2	0	0	0	2	1	0	0	1	0	2	0	0	0	0	0
OTU_1903	0	0	0	0	0	0	0	0	2	0	0	0	0	0	0	0	0	0	0	0	1	0	0	0	0	0	0	0	0	0	0	1	0	0	0	0	0	0	0	0	0	0	1	0	0	0	0	0	0
OTU_1727	0	0	0	1	0	0	0	0	0	0	0	0	0	0	1	0	0	0	0	0	0	0	0	0	0	0	0	0	0	0	1	0	0	0	0	0	0	0	0	0	0	0	1	0	0	0	0	0	0
OTU_1287	0	1	0	0	0	0	0	0	1	0	0	0	0	0	0	0	0	0	1	1	0	0	0	0	0	1	0	0	0	0	0	1	0	0	0	0	0	0	0	0	0	0	0	0	0	0	0	0	0
OTU_749	1	0	0	0	0	0	0	0	0	0	0	0	0	1	0	0	1	0	0	0	0	1	0	0	0	0	0	0	0	0	1	0	1	1	0	0	0	0	0	0	0	0	0	0	0	0	0	1	0
OTU_344	0	0	0	0	0	0	0	6	1	0	0	0	1	0	0	0	0	0	0	0	0	2	1	1	0	0	0	0	0	0	0	0	0	0	2	0	0	0	0	0	0	1	1	0	0	0	0	0	2
OTU_1737	0	0	0	0	0	0	0	0	0	0	0	0	0	0	1	0	0	0	0	1	0	0	0	1	0	0	0	0	0	0	0	0	0	0	0	0	0	0	0	1	0	0	0	0	0	0	0	0	0
OTU_1642	0	1	0	0	0	0	0	0	0	0	0	0	0	0	0	0	0	0	0	0	0	0	0	0	0	0	0	0	0	0	0	0	0	0	0	0	0	0	0	0	0	0	0	0	0	0	0	0	0
OTU_462	0	1	0	0	0	0	5	0	0	0	0	0	0	0	0	0	0	0	0	0	0	0	0	0	0	2	0	0	0	0	0	3	1	1	0	0	0	0	0	0	0	3	0	0	0	1	0	0	0
OTU_676	0	0	1	1	0	0	0	0	0	0	0	0	0	0	0	1	0	0	0	0	0	0	0	0	0	0	0	1	0	0	0	0	0	0	2	0	0	1	0	0	1	0	0	0	0	0	0	1	0
OTU_1660	0	0	0	0	1	0	0	0	0	0	0	0	1	1	0	0	0	0	0	0	0	0	0	0	0	0	1	0	1	2	0	0	0	0	0	0	0	0	0	0	0	0	0	0	0	0	0	0	0
OTU_1223	0	0	0	0	0	0	0	0	0	0	0	0	0	0	0	0	0	0	0	0	0	0	1	3	0	0	0	0	0	0	0	0	0	0	0	1	1	1	0	0	2	0	0	0	0	0	1	0	0
OTU_480	1	0	0	0	0	0	0	1	0	0	0	0	0	2	0	0	1	0	1	0	0	2	1	0	1	0	1	0	0	0	0	0	0	0	0	0	1	0	0	3	0	0	0	0	0	0	0	0	0
OTU_2421	0	0	0	0	0	0	0	0	0	0	0	0	0	0	0	0	0	0	0	0	0	0	0	0	1	0	0	0	0	0	0	0	0	0	0	0	0	0	0	0	0	0	0	0	0	0	0	0	0
OTU_2251	0	0	0	0	0	0	0	0	0	0	0	0	0	0	0	0	0	0	0	0	0	0	0	0	0	0	0	0	0	0	0	1	0	0	0	0	0	0	0	0	0	1	0	0	0	0	0	0	0
OTU_2542	0	0	0	0	0	0	0	0	0	0	0	0	2	0	0	0	0	0	0	0	1	0	0	0	0	0	0	0	0	0	0	0	0	0	0	0	0	0	0	0	0	0	0	0	0	0	0	0	0
OTU_706	0	0	0	0	0	0	0	0	0	0	0	0	1	1	0	0	0	0	1	0	0	1	1	0	0	0	0	0	0	0	0	1	0	0	1	0	0	0	0	0	0	0	0	0	0	0	0	0	0
OTU_2515	0	0	0	0	0	0	0	0	0	0	0	0	0	0	0	0	0	1	0	0	0	0	0	0	0	0	0	0	0	0	0	1	0	0	0	0	0	0	0	0	0	0	0	0	0	0	0	0	0
OTU_1372	0	1	0	0	0	0	3	0	0	0	0	0	0	0	0	0	0	0	0	0	0	0	0	0	0	0	0	0	0	0	0	0	0	0	0	0	0	0	0	0	0	0	0	0	0	0	0	0	1
OTU_857	0	0	0	0	0	0	0	0	0	0	0	0	0	0	0	0	0	0	0	0	0	0	0	0	0	0	1	0	2	0	0	0	0	0	0	0	0	0	0	0	0	0	0	3	0	1	0	0	1
OTU_2087	0	0	0	0	0	0	0	0	0	0	0	0	0	0	0	0	0	0	0	0	0	0	0	0	0	0	0	0	0	0	0	0	0	0	0	0	0	0	0	0	0	1	0	0	0	0	0	0	0
OTU_270	0	0	2	0	0	2	0	3	1	1	1	0	0	0	0	0	1	2	1	2	0	2	2	1	1	0	1	2	0	2	2	3	0	2	0	1	1	0	1	0	1	1	2	0	0	0	0	1	0
OTU_1256	0	0	0	0	0	0	0	0	0	0	0	0	0	0	0	0	0	0	0	1	0	0	0	0	0	1	0	0	0	0	0	0	0	0	0	0	0	1	0	0	0	0	0	0	0	0	0	0	0
OTU_1005	0	0	0	1	1	3	0	0	0	0	0	0	0	1	0	0	0	0	1	0	1	0	0	0	0	0	0	0	0	0	1	0	0	0	0	0	0	0	0	0	0	1	0	0	0	0	0	2	0
OTU_1571	0	0	0	0	0	0	0	0	0	0	1	0	0	0	0	0	0	0	0	0	0	0	0	0	0	0	0	0	0	0	0	0	0	0	0	0	0	0	0	1	0	1	0	1	0	0	0	0	0
OTU_1983	0	0	0	0	0	0	0	0	0	0	0	0	0	0	0	0	0	0	0	0	0	0	0	0	0	0	0	1	0	0	0	0	0	0	0	0	0	0	0	0	0	0	0	0	0	0	1	0	0
OTU_595	0	0	0	0	0	0	0	0	1	0	0	0	0	1	0	0	0	1	0	0	1	1	0	0	1	1	0	0	0	1	0	0	0	0	0	1	0	0	0	0	0	0	0	0	0	1	0	0	0
OTU_1445	0	0	0	0	1	0	0	0	0	0	0	0	0	0	1	0	0	0	0	0	0	0	0	0	0	0	1	0	0	0	0	0	0	0	0	0	0	0	0	0	0	0	0	0	0	1	0	0	0
OTU_727	0	0	2	0	2	0	0	1	1	1	0	0	2	0	0	1	0	2	1	5	0	1	0	0	0	1	0	0	0	1	0	0	0	0	3	2	2	0	1	0	0	0	0	1	0	1	2	0	2
OTU_658	0	0	0	0	0	0	0	0	1	0	0	0	0	0	0	0	0	0	0	0	0	0	0	0	6	0	0	0	0	0	0	0	0	0	0	0	0	0	0	0	0	0	0	1	0	0	0	0	0
OTU_2242	0	0	0	0	0	1	0	0	0	0	0	0	0	0	1	0	0	0	0	0	0	0	0	0	0	0	0	0	0	1	0	1	0	0	0	0	1	0	0	0	1	1	0	0	0	0	0	0	0
OTU_1148	1	1	0	0	2	0	1	1	0	0	0	1	0	1	0	1	0	0	0	0	0	1	0	0	0	1	0	0	2	0	1	1	0	0	0	0	0	1	0	0	0	0	0	0	0	0	0	0	0
OTU_2510	1	0	0	0	0	0	0	1	0	1	0	0	0	0	0	0	0	0	0	0	0	0	0	0	0	0	0	0	0	0	0	0	0	0	0	0	0	0	0	0	0	0	0	0	0	0	0	0	0
OTU_1552	0	0	0	0	0	1	0	0	0	0	0	0	0	0	0	0	0	0	0	0	0	0	0	0	0	0	0	0	0	0	0	0	0	0	0	1	0	0	0	0	0	0	0	1	0	0	0	0	2
OTU_1572	0	0	2	0	0	0	0	1	0	0	0	0	0	0	0	0	0	0	1	0	0	0	0	0	0	0	0	0	0	2	0	0	0	0	0	0	0	1	0	0	0	0	0	0	0	0	0	0	2
OTU_879	0	0	0	0	0	2	0	0	0	0	0	0	0	0	0	0	0	1	0	0	0	0	1	0	0	1	0	0	0	0	0	0	0	0	0	1	0	0	0	0	0	0	0	0	0	0	1	0	0
OTU_807	0	0	0	0	1	1	1	0	0	0	0	0	0	1	0	1	0	0	1	0	0	0	0	0	2	0	0	1	0	0	0	0	0	0	0	0	0	0	0	0	1	1	1	0	0	1	0	0	0
OTU_2373	1	0	0	0	0	0	0	0	0	0	0	0	0	0	0	0	0	0	0	0	0	0	0	0	1	0	0	0	0	0	0	0	0	0	0	0	0	0	0	0	0	0	0	0	0	0	0	0	0
OTU_1557	0	0	0	0	0	0	0	0	0	0	0	0	0	0	0	0	0	0	0	1	0	0	0	0	0	0	0	0	0	0	0	1	0	0	0	0	0	0	0	0	0	0	0	1	0	0	0	0	0
OTU_1378	0	0	0	0	0	0	0	0	0	0	0	0	0	0	0	0	0	0	0	0	0	0	0	0	1	0	0	0	0	0	0	0	0	0	0	0	0	1	0	0	0	0	0	1	1	0	0	0	0
OTU_2168	0	0	0	1	0	0	0	0	0	0	0	0	1	0	2	0	0	0	0	0	2	1	2	1	0	0	0	0	0	0	1	1	1	1	0	0	0	0	0	0	0	0	1	0	0	0	1	0	0
OTU_898	0	0	0	0	0	1	0	0	0	0	2	0	0	0	1	0	0	1	0	0	0	0	0	0	0	0	0	0	0	0	0	0	0	0	0	0	0	0	1	0	0	0	0	0	0	0	0	0	0
OTU_1593	0	2	0	0	0	0	0	0	0	0	0	0	0	0	0	0	0	0	0	0	0	0	0	0	0	0	0	0	0	0	0	0	0	0	0	0	0	0	0	0	0	0	0	0	0	0	0	0	0
OTU_1212	0	0	0	0	1	0	1	0	0	0	0	0	0	0	0	0	0	0	0	0	0	0	0	0	1	0	0	0	0	0	0	0	0	1	0	0	1	0	0	0	1	0	0	0	0	1	0	0	2
OTU_713	0	0	1	0	0	5	0	0	0	1	0	2	1	0	1	0	0	0	0	0	0	0	1	0	0	1	0	0	0	0	0	0	0	0	0	0	2	1	0	0	0	1	0	1	1	0	0	0	1
OTU_2100	0	0	0	0	0	0	0	0	0	0	0	0	0	0	0	0	0	0	0	0	0	0	0	0	0	0	0	0	0	0	0	0	0	0	0	0	0	0	0	0	0	1	0	0	0	0	0	0	0
OTU_1309	0	0	0	1	0	0	0	0	0	0	0	0	0	0	0	0	0	0	0	0	0	0	0	0	0	0	0	0	0	0	0	0	0	0	0	0	0	0	0	0	0	0	0	0	0	0	0	0	0
OTU_830	0	0	0	1	1	0	1	0	0	0	1	0	0	0	0	0	0	1	0	0	0	0	0	0	1	0	0	0	1	0	0	0	0	1	0	0	1	0	0	0	0	1	0	1	0	0	0	0	0
OTU_873	1	0	0	1	0	0	0	0	1	0	0	0	0	1	0	0	0	2	1	0	0	1	1	0	0	1	0	0	0	1	0	0	0	1	0	0	0	0	0	0	1	2	0	0	0	1	0	0	0
OTU_1644	0	0	0	0	0	0	0	0	0	0	0	0	0	0	0	0	0	0	0	0	0	1	0	0	0	0	0	0	0	0	0	0	0	0	0	0	0	0	0	0	0	0	0	0	0	0	0	0	1
OTU_2534	0	0	0	0	0	0	0	0	0	0	0	0	0	0	0	0	0	0	0	0	0	0	0	0	0	0	0	0	0	0	0	0	0	0	0	0	0	0	0	0	0	0	0	0	0	0	0	0	0
OTU_607	0	0	0	0	1	0	0	0	0	0	0	0	1	0	0	0	0	0	0	1	0	0	1	1	1	1	0	0	0	0	0	1	0	0	0	0	0	0	0	0	0	0	0	0	0	0	0	0	0
OTU_1527	0	0	0	2	0	0	0	0	0	0	0	0	0	0	0	0	0	0	0	0	0	0	0	0	0	0	0	0	0	0	0	0	0	0	0	0	0	0	0	0	0	0	0	0	0	0	0	0	0
OTU_669	1	0	0	0	0	0	0	0	1	0	0	0	0	0	0	1	0	0	2	0	0	0	1	0	0	1	0	0	0	0	0	0	0	0	0	1	0	1	1	1	0	0	0	0	0	1	0	2	1
OTU_779	0	1	0	0	0	0	1	0	0	0	0	0	0	0	0	1	1	2	0	1	0	0	0	0	0	1	0	0	0	0	0	0	0	0	0	0	0	0	0	1	0	0	0	0	1	0	0	0	0
OTU_1381	0	0	0	0	0	0	0	0	1	0	0	0	0	0	0	0	0	0	0	0	0	0	0	0	0	0	0	1	0	0	0	0	0	0	0	0	0	0	1	0	1	0	0	0	0	0	0	0	0
OTU_1906	0	0	0	0	0	0	0	0	0	0	0	0	0	0	0	0	0	0	0	0	0	0	0	0	0	0	0	0	0	0	0	0	0	0	0	1	0	0	0	0	0	0	0	0	0	0	0	0	0
OTU_861	0	0	0	1	0	0	2	0	0	0	0	0	0	0	0	0	0	0	0	0	0	0	0	0	0	0	0	0	0	0	0	0	0	0	0	0	0	3	0	0	0	0	0	0	0	0	0	0	0
OTU_1386	1	1	0	2	0	0	2	1	0	1	0	0	0	0	0	0	0	1	0	0	0	0	0	0	1	0	1	0	0	0	0	1	0	0	0	0	0	0	0	0	0	0	0	0	0	0	0	1	0
OTU_985	0	0	0	1	0	0	0	0	0	0	1	0	0	0	0	0	0	0	0	0	0	0	0	0	0	0	0	0	0	0	0	0	0	0	0	0	0	0	0	0	0	0	0	0	0	0	0	0	0
OTU_1000	0	0	1	0	0	0	0	0	0	0	0	0	0	0	0	0	0	0	0	0	0	0	0	0	1	0	1	0	0	1	0	0	0	0	0	0	0	0	0	0	0	0	0	0	0	0	0	0	0
OTU_1211	0	0	1	0	1	0	0	1	0	0	0	0	0	0	0	0	0	0	0	0	0	0	0	0	0	0	0	1	0	3	0	0	0	0	0	0	1	1	0	0	0	0	1	0	0	0	0	0	0
OTU_2429	0	0	0	0	0	0	0	0	0	0	0	0	0	0	0	0	0	0	0	0	0	0	0	0	0	0	0	0	0	0	1	0	0	0	0	0	0	0	1	0	0	0	1	0	0	0	0	0	0
OTU_593	0	0	0	0	0	1	0	0	0	0	0	0	0	0	0	1	0	0	0	0	0	0	0	0	0	1	0	0	2	0	0	0	0	0	0	0	0	0	0	0	0	0	0	0	0	0	0	0	4
OTU_1876	0	0	0	0	0	1	0	0	0	0	0	0	0	0	0	0	0	0	0	0	1	0	1	1	0	0	0	1	0	0	0	0	0	0	0	0	0	0	0	0	0	0	0	0	0	0	0	0	0
OTU_2051	0	0	0	0	0	0	0	0	0	0	0	0	0	0	0	1	0	0	0	0	0	0	0	0	0	0	0	0	0	0	0	0	1	0	0	0	0	0	0	1	1	0	0	0	0	0	1	0	0
OTU_1972	0	0	0	0	0	0	0	0	0	0	0	0	1	0	4	0	0	0	0	0	0	0	1	0	0	1	0	0	0	0	0	1	0	1	0	0	0	0	0	0	0	2	1	0	1	0	0	0	0
OTU_1058	0	0	0	0	0	0	0	0	0	0	0	0	0	0	0	0	0	0	0	0	0	0	0	0	0	0	0	0	0	0	0	0	0	3	0	0	0	0	0	0	0	0	0	0	0	0	0	0	0
OTU_1797	0	0	0	0	0	0	0	0	0	0	0	0	1	0	0	0	0	0	0	1	0	0	0	0	0	0	0	0	0	0	0	0	0	0	1	0	0	0	0	0	0	0	0	0	0	0	0	0	0
OTU_689	0	0	0	0	0	0	0	0	1	0	0	0	0	1	0	0	0	0	0	0	0	0	0	0	0	0	1	1	0	0	0	0	0	0	0	1	1	0	0	0	0	0	0	0	0	0	1	0	0
OTU_2003	0	0	1	0	0	0	0	0	0	0	0	0	0	0	1	0	0	0	0	0	0	0	0	0	0	0	2	0	0	1	0	0	0	1	0	0	0	0	0	0	0	0	0	0	0	0	2	0	0
OTU_1674	4	0	1	0	1	0	0	0	0	0	0	0	0	0	0	0	0	0	0	0	0	0	0	0	0	0	0	0	0	0	0	0	1	0	0	0	0	0	0	0	0	0	0	0	0	0	0	0	1
OTU_1449	0	0	0	1	0	0	1	0	0	0	0	0	0	0	0	0	0	0	0	0	0	0	0	0	0	0	0	0	0	0	0	0	0	0	0	0	0	0	0	0	0	0	0	0	0	0	0	0	0
OTU_1031	0	0	0	0	1	0	0	0	0	0	0	0	0	0	0	0	0	0	0	0	0	1	0	0	0	2	0	0	0	0	0	0	0	0	0	0	0	0	0	0	0	0	0	0	1	0	0	0	0
OTU_2300	0	0	0	0	0	0	0	0	0	0	0	1	0	0	0	0	1	0	0	0	0	0	0	0	0	1	1	0	0	0	0	0	0	1	0	0	0	0	0	0	0	0	0	0	0	2	0	0	0
OTU_1294	0	0	0	0	0	0	0	0	0	0	0	0	0	0	0	0	0	0	0	0	0	0	0	0	0	0	1	0	0	0	0	0	0	0	0	0	0	0	0	0	0	0	0	0	0	0	0	0	0
OTU_1244	1	0	0	0	0	0	0	0	0	0	0	0	0	1	0	1	1	0	0	2	0	1	0	0	0	1	1	0	0	1	0	1	0	0	3	0	0	0	0	1	0	0	0	0	0	0	0	0	0
OTU_1234	0	0	0	0	0	0	2	0	0	0	0	0	0	2	0	0	0	0	0	1	0	0	0	0	0	1	2	0	0	1	0	0	0	0	0	0	0	0	0	0	0	0	0	0	0	1	0	0	0
OTU_1627	0	0	1	0	0	0	0	0	0	0	0	0	0	0	0	0	0	0	0	0	0	0	0	0	0	1	0	1	0	0	0	0	0	0	1	0	0	0	0	0	0	0	1	0	0	0	0	0	0
OTU_1812	0	0	0	0	0	0	0	0	0	0	0	0	0	1	0	0	0	0	0	0	0	0	1	0	0	0	0	1	0	0	0	0	0	0	0	0	0	0	0	2	3	0	0	0	0	0	0	0	0
OTU_1839	1	1	0	0	0	0	0	0	0	0	0	0	0	0	0	0	0	0	0	0	0	0	0	0	0	0	0	0	0	0	0	0	0	0	0	0	0	0	0	0	0	0	0	1	0	1	0	0	0
OTU_1095	0	1	0	0	1	1	0	1	0	1	0	1	0	0	0	0	0	0	0	0	0	0	0	1	0	0	0	0	1	0	0	0	0	0	0	1	0	0	0	0	0	0	1	1	0	0	0	0	0
OTU_716	5	0	0	0	0	0	0	0	1	0	0	0	0	0	0	0	0	0	0	0	0	0	0	2	0	0	0	0	0	0	0	1	0	0	0	0	0	0	0	0	0	1	0	1	0	0	0	0	0
OTU_594	0	0	0	1	0	1	0	0	0	0	0	0	0	0	1	0	0	1	0	0	0	0	0	0	0	0	0	1	0	0	0	0	0	0	1	0	0	0	0	0	0	0	0	0	0	0	0	0	1
OTU_2166	0	0	0	0	0	0	0	0	0	0	0	2	0	0	0	0	0	0	1	0	1	0	0	0	0	0	1	0	0	0	0	0	1	0	0	0	0	0	0	1	0	0	0	0	0	0	0	0	0
OTU_1767	0	0	0	0	0	0	0	0	0	0	0	1	0	0	0	0	0	0	0	0	0	0	0	0	0	0	0	0	0	0	0	1	0	0	0	0	0	0	0	0	0	0	0	0	0	1	0	0	0
OTU_1957	0	0	0	0	0	0	0	0	0	0	0	0	0	0	0	0	0	4	0	0	0	0	0	0	0	0	0	0	0	0	0	0	1	0	0	0	0	0	0	0	0	0	0	0	0	0	0	0	0
OTU_1190	0	0	0	0	0	0	0	0	0	0	0	0	0	0	0	1	0	0	0	0	0	0	0	0	0	2	0	0	0	1	0	0	0	0	0	0	0	0	0	0	0	0	0	0	0	1	0	0	0
OTU_784	0	0	0	0	0	2	0	0	0	0	0	0	0	0	0	0	0	0	0	0	0	0	0	0	1	0	0	0	0	0	0	0	0	0	0	0	0	0	1	0	0	0	0	1	0	0	0	0	0
OTU_1290	0	0	0	0	0	0	1	0	0	0	0	0	0	0	0	0	0	0	0	0	0	0	0	0	2	0	0	0	0	0	0	0	0	0	0	0	0	0	0	0	1	0	0	0	0	0	0	0	0
OTU_733	0	0	0	1	0	0	0	0	0	0	0	0	0	0	2	0	0	0	1	2	0	0	1	1	0	1	0	0	0	0	2	0	0	1	0	0	0	2	0	0	0	0	0	0	0	0	1	0	0
OTU_1253	0	0	0	0	0	0	0	0	0	0	1	0	0	0	1	1	0	0	0	0	0	0	0	0	1	0	0	0	0	0	0	0	0	1	0	0	0	1	0	0	0	0	0	0	0	0	1	0	0
OTU_2138	0	0	0	0	0	0	0	0	0	0	0	0	0	0	0	0	0	0	0	0	0	0	0	0	0	0	0	0	0	0	0	0	0	0	0	0	0	0	1	0	0	0	0	0	0	0	1	0	0
OTU_584	1	0	0	0	0	0	0	0	0	0	0	1	1	1	0	0	0	0	1	0	3	1	0	1	0	0	0	0	0	0	1	0	1	0	1	0	1	0	2	1	0	0	0	0	0	0	0	0	0
OTU_1993	0	0	0	0	0	0	1	0	0	1	0	0	0	0	0	0	0	0	0	0	0	0	0	0	0	0	0	0	0	0	0	0	0	0	0	0	0	0	0	0	0	0	0	0	1	0	0	0	0
OTU_813	0	0	0	0	0	0	1	0	0	0	0	2	0	0	0	0	0	0	1	0	0	0	0	0	0	0	0	0	0	0	0	1	0	1	0	0	0	0	0	0	0	0	0	0	0	0	0	0	0
OTU_1189	0	0	0	0	0	0	0	0	0	0	0	0	0	0	0	0	0	0	0	0	0	0	0	0	0	0	0	0	0	0	0	0	0	2	1	0	0	0	0	0	0	1	0	0	0	0	0	0	0
OTU_790	0	0	0	0	0	0	0	2	0	0	4	1	0	0	0	0	0	0	0	0	0	0	0	0	1	0	0	0	0	0	0	0	0	0	0	0	0	1	0	0	0	0	0	0	0	1	0	2	0
OTU_1603	0	0	0	0	0	0	0	0	0	0	0	1	0	2	0	0	1	0	0	0	0	0	0	0	0	0	1	1	0	0	0	0	0	1	0	1	1	0	0	0	0	0	0	0	0	0	0	0	2
OTU_1069	1	0	0	0	0	0	0	0	0	1	0	0	0	0	0	0	0	0	0	0	0	0	0	0	0	0	0	0	0	0	0	0	0	0	0	0	0	0	0	1	0	0	0	0	0	1	0	0	0
OTU_1787	0	0	0	0	0	0	0	0	0	0	0	0	0	0	0	0	0	0	0	0	0	0	0	0	0	0	1	0	0	0	0	0	1	0	0	0	0	0	1	0	0	0	1	0	0	0	1	2	0
OTU_1396	0	0	0	0	1	1	0	0	0	0	2	0	0	0	0	0	1	2	3	0	0	0	1	2	2	0	0	0	1	2	1	0	0	0	0	0	0	0	2	1	1	0	0	0	0	1	0	0	1
OTU_1444	0	0	0	0	0	2	0	0	0	0	0	0	0	0	0	0	0	0	0	0	0	0	0	0	0	0	0	0	0	0	0	0	0	0	0	0	1	0	0	0	0	0	0	0	0	0	0	0	0
OTU_1084	0	0	0	0	0	0	0	0	0	0	0	0	0	1	0	0	1	0	0	0	0	2	0	0	0	0	1	0	1	0	0	0	0	0	0	0	0	0	0	0	0	0	0	0	0	0	0	0	1
OTU_547	0	0	0	0	0	0	1	0	0	0	0	3	0	1	1	1	0	0	0	0	0	0	0	1	1	1	1	1	0	0	0	1	1	0	0	0	0	0	0	0	1	0	0	0	0	0	1	1	0
OTU_1059	0	0	1	0	0	0	0	1	0	1	0	1	1	1	0	0	0	0	0	0	0	0	0	0	0	0	0	1	2	0	1	0	1	0	2	0	0	0	0	0	1	0	4	0	1	2	0	0	0
OTU_1408	0	0	0	0	0	0	1	0	0	0	0	0	0	0	1	0	0	0	0	0	0	0	1	0	0	0	0	1	0	0	0	0	0	0	0	0	0	0	0	0	0	0	0	0	0	0	0	0	0
OTU_890	1	0	0	0	0	0	0	0	0	0	0	0	4	0	0	0	0	0	0	0	0	4	0	0	0	0	2	0	2	0	1	0	0	1	2	0	0	0	0	0	1	0	0	0	0	0	1	0	1
OTU_482	0	0	0	0	0	1	1	0	0	3	2	1	0	1	0	0	0	0	0	1	1	0	1	0	0	1	1	0	0	1	1	0	0	0	0	0	0	0	0	1	0	0	0	1	0	1	0	1	1
OTU_1649	0	0	1	0	0	0	0	0	0	2	0	0	0	0	0	1	0	0	0	0	0	1	0	1	0	0	1	0	0	0	0	0	0	0	0	0	0	0	0	0	0	1	0	0	0	0	1	0	0
OTU_994	1	0	4	0	0	1	0	0	0	0	0	0	0	0	0	0	0	1	1	0	0	0	0	0	0	0	0	1	0	0	0	0	0	0	0	0	1	0	0	0	0	1	0	0	0	0	0	0	1
OTU_791	0	0	0	1	0	0	0	1	0	0	0	0	0	0	0	0	0	0	1	0	0	0	0	1	2	1	0	0	0	0	0	0	1	0	0	0	3	0	0	0	1	1	0	1	4	1	0	0	2
OTU_1063	0	1	0	0	0	0	2	1	1	0	0	1	0	0	0	0	3	2	0	0	0	1	0	0	1	0	0	0	0	1	0	0	0	0	0	0	0	0	0	1	0	0	0	0	0	0	1	0	0
OTU_2107	0	0	0	0	0	1	0	0	0	0	0	0	0	0	0	0	0	0	1	0	0	1	0	0	0	0	0	0	0	0	0	0	0	0	0	0	0	0	0	0	0	0	0	0	0	0	0	0	0
OTU_1220	0	1	0	0	0	0	1	0	0	0	0	0	0	0	0	0	0	0	0	0	0	0	0	0	0	0	0	0	0	0	0	0	0	0	0	0	0	0	0	0	0	0	0	0	0	0	0	0	0
OTU_1600	0	0	0	0	0	0	0	0	0	0	0	0	0	0	0	0	0	0	0	0	0	0	0	0	0	0	0	0	0	0	0	0	0	0	0	0	0	0	0	0	0	0	1	0	0	0	0	0	0
OTU_731	0	1	0	0	0	1	1	0	1	1	0	0	0	0	0	3	0	0	0	0	0	0	0	0	0	2	0	1	0	0	1	0	1	0	1	0	2	0	0	0	0	0	0	0	0	0	0	1	1
OTU_2521	1	0	0	0	0	0	0	0	0	0	0	0	0	2	0	0	0	0	0	0	0	0	0	0	0	1	0	0	0	0	0	0	0	0	0	0	0	0	0	0	0	0	0	0	0	1	0	0	0
OTU_357	0	0	0	0	0	0	1	1	1	0	3	0	1	1	0	0	0	1	0	3	0	0	0	0	1	0	0	0	0	0	1	0	1	0	0	1	1	1	0	1	0	0	0	0	0	1	0	1	0
OTU_1087	0	0	0	0	1	0	0	0	0	0	0	0	0	1	0	0	0	0	1	0	0	0	0	0	0	0	1	0	0	0	0	0	0	0	0	0	0	0	0	0	0	0	0	0	0	0	0	1	0
OTU_1534	0	2	0	0	0	0	0	0	0	0	0	0	0	0	0	0	0	0	0	0	0	0	0	0	0	0	0	0	0	0	0	0	0	0	0	0	0	0	0	0	0	0	0	0	0	0	0	0	0
OTU_943	0	0	0	0	0	0	0	0	0	0	0	0	0	0	1	0	0	0	0	0	0	0	0	0	0	0	0	0	0	0	0	0	1	0	3	0	1	0	0	1	1	0	0	0	0	0	0	1	0
OTU_2226	0	0	0	0	0	0	0	0	0	0	0	0	0	0	0	0	0	0	0	1	0	0	0	0	0	0	0	0	0	0	0	0	0	0	0	0	0	0	0	0	0	0	0	0	0	0	0	0	0
OTU_1366	0	1	1	0	0	0	0	0	0	0	0	0	0	1	1	0	0	0	0	0	0	1	0	0	0	0	0	0	0	0	0	0	0	0	1	0	0	0	0	0	0	0	0	0	0	0	0	0	3
OTU_2466	0	0	0	0	0	0	0	0	0	0	0	1	0	0	0	0	0	0	0	0	0	0	0	0	0	0	0	0	0	0	0	0	0	0	0	0	0	0	0	0	0	0	0	0	0	0	0	0	0
OTU_1769	0	0	0	0	0	0	1	0	0	0	0	0	0	0	1	0	0	0	0	0	0	0	0	0	0	0	0	0	0	0	0	1	0	0	0	0	0	0	0	0	0	0	0	0	0	0	0	0	1
OTU_751	0	0	6	0	0	0	1	0	0	1	0	0	0	0	1	0	0	1	0	1	0	1	0	0	0	1	0	1	1	1	0	2	0	0	0	0	0	0	2	0	0	0	0	0	0	0	0	0	0
OTU_970	0	0	0	0	0	0	0	0	0	0	2	0	0	0	0	0	0	0	0	0	0	0	0	0	0	0	0	0	0	0	0	1	1	0	0	0	0	0	0	0	0	0	0	0	0	0	1	0	0
OTU_1292	3	0	0	1	0	0	0	0	0	1	1	0	0	0	1	0	1	0	0	0	0	0	0	0	2	0	0	1	0	0	0	0	3	1	1	2	0	0	0	0	2	0	0	0	2	0	0	0	0
OTU_1039	0	0	0	0	1	0	0	0	1	1	2	0	0	0	0	0	0	2	0	0	0	0	0	0	0	0	0	0	0	0	0	1	0	0	0	0	1	0	3	0	1	0	0	0	0	0	0	1	0
OTU_1198	0	1	0	0	0	0	0	0	0	0	0	0	0	0	0	0	0	0	0	0	0	0	0	0	1	0	0	0	0	0	1	0	0	0	0	0	0	1	0	0	0	1	0	0	1	0	0	0	0
OTU_1259	0	1	0	0	0	0	0	0	0	0	0	0	0	0	0	0	1	0	1	0	0	0	0	0	0	0	1	0	0	0	0	0	0	0	1	1	0	0	0	0	0	0	0	0	0	0	0	0	1
OTU_795	0	0	0	1	0	0	0	1	0	0	1	0	0	0	0	0	0	0	0	0	0	0	0	0	2	0	0	0	0	0	0	0	1	0	1	0	0	0	1	0	1	0	0	0	0	0	0	1	0
OTU_1615	0	0	1	0	0	0	0	0	0	0	0	0	0	0	0	0	0	0	0	0	0	0	0	0	0	0	1	0	0	0	0	0	0	0	1	0	0	0	0	0	0	0	0	0	0	0	0	0	0
OTU_2375	0	0	0	0	0	0	0	0	0	0	0	1	0	0	0	0	0	0	0	0	0	0	0	0	0	0	0	0	0	0	0	0	0	0	0	0	0	0	0	0	0	0	0	0	0	0	0	0	0
OTU_369	0	0	0	0	0	0	0	0	0	0	0	0	0	0	0	4	3	0	1	3	0	0	0	0	0	0	0	0	0	0	0	0	2	0	0	0	0	0	0	0	0	0	3	0	0	1	0	1	1
OTU_1205	0	0	0	0	0	0	0	0	0	0	0	0	0	0	0	0	0	0	0	0	0	0	0	0	1	0	0	0	0	0	0	0	0	0	0	0	0	0	0	0	0	0	0	0	0	0	0	0	0
OTU_880	0	0	0	0	0	1	0	1	0	0	0	2	0	0	0	0	0	1	1	0	0	0	0	0	0	2	0	0	0	0	0	0	0	1	0	0	0	1	0	0	1	0	1	0	0	0	1	0	0
OTU_1834	0	0	0	0	0	0	0	0	0	0	0	0	0	0	0	0	0	0	0	0	0	0	0	0	0	0	1	0	1	0	0	0	0	0	0	0	0	0	1	0	0	0	0	0	1	0	0	0	0
OTU_1537	0	1	0	0	0	0	0	0	0	0	0	0	2	0	0	0	0	0	0	0	0	0	0	0	0	0	0	0	0	0	0	0	0	0	0	0	0	0	0	0	1	0	0	0	0	0	0	0	0
OTU_2004	0	0	0	0	0	0	0	0	0	0	0	0	0	1	0	0	0	0	0	0	0	0	0	0	0	0	0	0	0	0	0	0	0	0	0	0	0	0	0	0	0	0	1	0	0	1	0	0	0
OTU_1269	0	0	0	0	0	0	1	1	0	0	0	0	0	1	0	0	0	0	0	0	0	0	0	0	0	0	0	0	0	0	0	0	0	0	0	0	0	0	0	0	0	0	1	0	2	0	0	0	1
OTU_1447	0	1	0	0	0	0	0	1	0	0	0	0	0	0	0	0	0	0	0	0	2	0	0	0	0	0	0	0	0	1	0	0	1	0	0	0	0	0	0	0	0	0	0	0	0	0	0	0	0
OTU_806	0	0	0	0	2	0	0	0	0	0	0	0	0	1	0	0	0	0	0	0	0	0	0	0	0	0	0	0	0	1	0	0	0	0	0	0	0	0	0	0	1	0	0	0	0	0	0	3	0
OTU_780	0	0	0	0	0	0	0	0	0	0	0	0	0	0	0	0	0	0	5	0	0	0	1	0	0	0	0	0	0	1	0	0	0	0	0	0	1	0	0	0	0	0	0	0	0	0	0	0	0
OTU_475	1	0	2	0	0	1	0	0	0	0	0	1	0	0	0	0	0	0	3	0	0	1	0	0	0	1	2	0	0	0	0	0	0	0	0	0	0	0	0	0	0	0	0	0	0	0	0	0	2
OTU_1194	0	0	0	0	1	0	0	0	0	0	0	0	0	0	0	1	0	0	0	0	0	0	0	0	1	0	0	1	0	0	0	0	0	0	0	0	0	0	0	0	0	0	0	0	0	0	0	1	0
OTU_1692	0	0	0	0	0	0	0	0	0	0	0	0	0	0	0	0	0	0	0	0	0	0	0	0	0	0	0	0	0	0	0	0	0	0	0	0	0	0	0	0	0	0	0	0	0	0	0	0	0
OTU_2334	1	1	1	0	0	1	0	1	0	0	0	0	2	0	0	3	0	0	9	1	1	6	0	0	0	0	0	0	0	2	1	0	1	0	2	0	0	0	0	0	2	1	0	0	0	1	0	0	1
OTU_2070	0	0	0	0	0	0	0	0	0	0	0	0	0	1	0	0	0	0	3	0	0	0	0	0	0	0	0	0	0	0	0	0	0	0	0	0	0	0	0	0	0	0	0	0	0	0	0	0	0
OTU_1800	0	0	0	0	0	0	0	0	2	0	0	0	0	0	0	0	0	0	0	0	0	0	0	0	0	0	0	0	0	0	0	0	1	0	1	0	0	0	0	0	0	0	0	0	0	0	0	0	0
OTU_723	0	0	0	0	0	0	0	0	0	0	0	0	1	0	0	0	0	0	0	0	3	0	0	0	0	0	3	1	0	0	1	0	0	0	0	0	0	0	0	0	0	0	0	0	0	0	0	0	0
OTU_2180	0	0	0	0	0	0	0	0	0	0	0	0	0	0	0	0	0	0	0	0	0	0	0	0	0	0	0	0	0	0	0	0	0	0	0	0	0	0	0	0	0	0	0	0	0	0	0	0	0
OTU_1804	0	1	0	0	0	0	0	1	2	0	0	0	0	0	0	0	0	0	0	0	0	0	0	0	0	0	0	0	0	0	0	0	1	0	2	0	0	0	1	0	0	0	0	0	0	0	0	1	0
OTU_1645	0	0	1	1	0	0	0	0	0	0	0	0	0	0	0	1	0	0	0	0	0	0	0	0	0	0	1	0	1	0	0	0	0	0	0	0	0	0	0	0	0	0	0	0	0	0	0	0	2
OTU_1516	0	0	0	0	0	0	0	0	0	0	0	1	0	0	0	0	0	0	0	0	0	0	0	0	0	0	0	0	0	0	0	0	0	0	0	0	0	0	0	0	0	0	0	0	0	0	0	0	0
OTU_1001	0	2	0	0	0	0	1	0	0	1	0	0	0	0	0	0	0	0	0	0	0	0	0	0	0	0	0	0	0	0	0	0	0	0	0	0	0	0	0	0	0	0	0	0	0	1	1	0	0
OTU_2492	0	0	0	0	0	0	1	0	0	0	0	0	0	0	0	0	0	0	0	0	0	0	0	0	0	0	0	0	0	1	0	0	2	0	0	0	0	0	1	0	0	0	0	0	0	0	0	0	0
OTU_1519	0	0	0	0	0	0	1	0	0	0	0	0	0	0	0	0	0	0	0	0	0	0	0	0	0	0	0	0	0	0	0	0	0	0	0	2	0	0	0	0	0	0	1	0	0	0	0	0	0
OTU_899	0	0	0	0	0	1	1	0	0	0	0	1	0	0	0	0	0	0	0	1	0	0	0	0	0	1	0	1	0	0	1	0	0	0	0	0	0	0	0	0	0	0	0	0	1	1	0	0	0
OTU_841	0	0	0	1	0	0	1	0	0	1	0	0	0	0	0	0	0	1	0	0	0	0	0	0	0	1	0	1	0	0	0	0	1	0	1	0	0	0	0	0	1	0	1	0	0	0	0	0	0
OTU_755	0	0	1	1	0	0	0	0	0	0	0	0	0	0	0	0	0	0	0	0	0	1	1	0	1	0	0	3	1	0	1	0	0	0	0	0	0	0	0	0	0	0	0	0	0	0	0	0	0
OTU_1597	0	0	0	0	2	0	0	0	0	0	0	0	0	0	1	0	0	0	0	0	0	0	0	0	0	0	0	0	0	0	0	0	0	0	0	0	0	0	0	0	0	1	0	0	0	0	1	0	0
OTU_1549	0	0	0	0	0	0	0	0	0	0	0	0	0	0	0	0	0	0	1	0	0	0	0	0	0	0	0	1	0	0	0	0	0	0	0	0	0	0	0	0	0	0	0	0	0	0	0	0	0
OTU_2488	0	0	0	0	0	1	0	0	0	0	1	1	1	0	0	1	0	0	0	0	0	0	0	0	0	0	0	0	0	0	1	1	0	0	1	0	0	0	0	0	0	1	0	1	1	0	0	1	0
OTU_2059	0	0	0	0	0	0	0	0	0	0	0	0	0	0	1	0	0	0	0	0	0	0	0	1	1	0	0	0	2	0	0	0	0	0	0	0	0	0	0	0	0	0	0	0	0	0	0	0	0
OTU_978	1	0	0	0	1	0	0	0	0	0	0	0	0	0	0	0	0	0	0	0	0	0	0	0	0	1	1	0	0	0	0	0	0	1	0	0	0	0	0	0	0	3	0	0	0	0	0	0	0
OTU_550	0	0	0	0	0	0	1	0	0	0	0	1	1	0	1	0	0	0	0	0	0	0	0	0	0	0	0	0	1	0	0	0	0	0	1	0	1	0	0	0	0	1	0	0	0	0	0	0	0
OTU_1183	0	0	0	0	0	0	0	0	0	0	0	0	0	0	0	0	0	0	0	0	0	0	3	1	0	0	0	0	0	0	0	0	0	0	0	0	0	0	0	0	0	0	0	0	0	0	2	0	0
OTU_1160	0	0	1	0	0	0	2	0	0	0	0	0	1	0	0	0	1	1	1	0	0	0	0	0	0	1	0	0	0	0	1	0	0	0	0	0	0	0	0	0	0	0	0	0	1	0	0	0	0
OTU_528	0	0	0	0	0	0	0	0	0	0	0	0	2	0	0	0	3	0	1	0	2	0	0	0	0	0	2	0	0	0	0	0	0	0	4	0	0	0	0	0	0	0	1	0	0	0	0	1	0
OTU_1547	0	1	0	0	0	0	0	0	0	0	0	0	0	0	0	0	0	0	0	0	0	0	0	0	0	0	0	0	0	1	0	0	0	0	0	0	0	0	0	0	0	1	0	2	0	0	0	0	0
OTU_1842	0	0	0	0	0	0	0	0	0	0	0	0	0	0	0	0	1	0	0	0	0	0	0	0	0	0	0	0	0	0	0	0	0	0	0	0	0	1	0	0	0	0	0	0	0	0	0	0	0
OTU_1196	1	0	0	0	0	0	0	0	2	1	0	1	0	1	2	0	1	0	0	0	0	0	0	1	0	0	0	0	0	0	0	0	0	0	0	1	0	1	0	0	0	0	0	0	0	0	0	0	0
OTU_598	0	0	0	0	0	0	0	0	0	0	0	0	0	0	0	1	0	0	0	0	0	0	0	0	0	1	0	0	0	1	2	0	0	0	0	0	0	0	0	0	0	0	0	0	0	0	0	1	0
OTU_2015	0	0	0	0	0	0	0	0	0	0	0	0	2	0	0	0	0	0	0	0	0	0	0	0	0	0	0	0	1	1	0	0	0	0	1	0	0	0	1	0	0	0	0	0	0	0	0	0	0
OTU_1390	0	0	0	0	0	0	0	0	2	0	0	0	0	1	2	0	0	0	0	0	0	0	0	0	0	0	0	0	0	0	0	0	0	0	0	0	0	0	0	0	0	0	0	0	0	0	0	0	0
OTU_1791	0	0	0	0	0	3	0	0	0	0	0	0	0	0	0	0	0	0	0	0	0	0	1	0	0	1	0	0	0	0	0	0	0	0	0	0	0	0	0	0	0	0	0	0	0	1	0	0	0
OTU_2203	0	0	0	0	0	0	0	0	0	0	2	0	0	0	0	0	0	0	0	0	0	1	0	0	0	0	0	0	0	0	0	0	0	0	0	0	0	0	0	0	0	0	0	0	0	0	0	0	0
OTU_1965	0	0	0	0	0	0	0	0	0	0	0	0	0	0	0	0	0	0	0	0	0	0	0	1	0	0	0	0	0	0	0	0	0	0	0	0	0	0	0	0	0	0	0	0	0	0	0	0	0
OTU_1424	0	0	0	2	1	0	0	0	0	0	0	0	1	0	0	0	0	0	0	0	0	0	0	0	0	0	0	1	0	0	0	0	0	0	0	0	0	0	0	0	0	0	0	0	0	0	0	0	0
OTU_1405	1	0	1	1	0	0	0	0	0	1	0	0	0	1	1	0	0	0	0	0	0	0	0	0	0	0	0	0	0	0	0	1	0	0	0	0	0	0	0	1	0	0	0	0	0	1	0	0	1
OTU_705	0	0	0	0	0	0	1	0	0	0	0	0	1	0	0	0	0	2	0	0	0	0	0	1	0	1	1	1	0	0	0	0	0	1	0	2	1	0	0	1	0	0	0	2	1	2	0	0	0
OTU_2269	0	0	0	0	0	0	0	0	0	0	0	0	0	0	0	0	0	0	0	0	0	0	1	0	0	0	0	0	0	0	0	0	0	0	0	1	0	1	0	0	0	0	0	0	0	0	0	0	0
OTU_1569	0	0	0	0	0	0	0	0	0	0	0	0	0	0	0	0	0	0	0	0	0	0	0	1	0	0	0	0	0	0	0	0	0	0	0	0	0	0	0	0	0	1	0	0	0	0	0	1	0
OTU_1064	0	0	1	0	0	0	0	0	0	0	0	0	0	0	0	0	0	0	0	0	0	0	0	0	0	0	0	0	0	1	0	1	0	0	0	0	0	0	0	1	0	0	1	0	0	0	0	0	0
OTU_1006	0	0	1	0	1	0	1	0	0	2	0	0	0	0	0	0	1	0	0	0	0	0	0	0	0	2	0	0	0	0	0	0	0	0	0	1	0	0	0	0	0	0	0	2	0	0	0	0	0
OTU_1348	0	1	0	0	0	0	0	0	0	0	0	0	0	0	0	0	0	0	0	2	1	0	0	0	1	0	0	0	0	0	0	0	0	0	0	0	0	0	0	0	1	0	0	0	0	0	0	0	0
OTU_940	0	0	0	0	0	0	0	0	0	0	0	0	0	0	0	0	0	0	0	0	0	0	0	0	0	1	0	0	0	0	0	1	0	0	0	0	0	0	0	0	0	0	0	0	0	0	0	1	0
OTU_2313	0	0	0	0	1	0	0	0	0	0	0	0	0	0	0	0	0	0	0	0	0	0	0	0	0	0	0	0	0	0	0	0	0	0	0	0	0	0	0	0	0	0	0	0	0	0	0	0	0
OTU_2209	0	0	0	0	0	0	0	0	0	0	0	0	0	0	0	0	0	0	1	0	0	1	0	0	0	0	0	0	0	0	0	0	1	0	0	0	0	0	0	0	0	0	0	0	0	0	0	0	0
OTU_2126	0	0	0	0	0	0	0	0	0	0	0	0	0	0	0	0	0	0	0	0	0	0	1	0	0	0	0	0	0	0	0	0	0	0	0	0	0	0	0	0	0	0	0	0	0	0	0	0	0
OTU_2311	0	0	0	0	0	0	0	0	0	0	0	0	0	1	0	0	0	0	0	0	0	0	0	1	0	1	0	0	0	0	0	0	0	0	0	0	0	0	0	0	0	0	0	0	0	0	0	1	0
OTU_1369	0	0	0	0	0	0	0	0	0	0	0	0	0	0	0	0	0	0	0	0	0	0	0	1	0	0	0	0	0	0	0	0	0	0	0	3	0	0	0	0	0	0	0	0	0	0	0	0	0
OTU_2469	0	0	0	0	0	0	0	0	0	0	0	0	0	0	0	0	0	0	0	0	0	0	0	0	0	0	0	0	0	0	0	0	0	0	0	0	0	0	0	0	0	0	0	0	0	0	0	0	0
OTU_1910	0	0	0	0	0	0	0	0	1	0	0	0	0	0	0	0	0	0	0	0	0	0	0	0	0	0	0	0	0	0	0	0	0	0	1	0	0	0	0	0	0	0	0	0	0	0	0	0	0
OTU_2153	0	0	0	0	0	0	0	0	0	0	0	0	0	0	0	0	0	0	0	0	0	0	0	0	0	0	0	0	0	0	0	0	0	0	0	0	0	0	0	0	0	0	0	0	0	0	0	0	0
OTU_1843	0	0	1	0	1	0	0	0	0	0	0	0	0	0	0	0	0	0	1	0	0	0	0	0	0	0	0	0	0	0	0	0	0	1	0	0	0	0	0	0	0	0	0	0	0	0	0	0	0
OTU_2066	0	0	0	0	0	0	0	0	0	0	0	0	0	0	0	0	0	0	0	0	0	0	0	0	0	0	0	0	0	0	0	0	0	0	0	0	0	0	0	0	0	0	0	0	0	0	0	0	0
OTU_1559	0	0	0	0	0	0	0	0	0	0	0	0	0	0	0	0	0	0	0	0	0	0	0	1	0	0	0	0	0	0	0	0	0	0	0	0	0	0	0	0	0	0	0	0	0	0	0	0	0
OTU_2340	0	0	0	0	0	0	0	1	0	0	0	0	0	0	0	0	0	0	0	0	0	0	0	0	0	0	0	0	0	1	0	0	0	0	0	0	0	0	0	0	0	0	0	0	0	0	0	0	0
OTU_2175	0	1	0	0	0	0	0	0	0	0	0	0	0	0	0	0	0	0	0	0	0	0	0	0	0	0	0	0	0	0	0	0	0	0	0	0	1	0	0	0	0	0	0	1	0	0	0	0	0
OTU_1911	0	0	0	0	0	0	0	0	0	0	0	1	0	0	0	0	0	0	0	0	0	0	0	0	0	0	0	0	0	0	0	0	0	0	0	0	0	0	0	0	0	0	0	0	0	0	0	0	0
OTU_552	0	0	0	0	1	1	2	0	3	0	0	0	0	1	0	0	0	0	0	0	0	0	0	0	0	1	2	0	0	0	0	0	0	0	0	0	1	1	0	0	0	0	0	0	1	2	0	0	1
OTU_1394	0	0	0	0	0	1	0	0	0	0	0	0	0	0	0	0	1	0	0	0	0	0	0	1	0	0	0	0	0	3	0	2	0	0	1	0	0	0	0	0	0	0	1	0	0	0	0	0	0
OTU_2390	0	0	0	0	0	1	0	0	0	0	0	0	0	0	0	0	0	0	0	0	0	0	0	0	0	0	0	0	0	0	0	0	0	0	0	0	0	0	0	0	0	0	0	0	0	0	0	0	0
OTU_2328	0	0	0	0	0	0	0	0	0	0	0	0	0	0	0	0	0	0	0	0	0	0	0	0	0	0	0	0	0	0	0	0	0	0	2	0	0	0	0	0	0	0	0	0	0	0	0	0	0
OTU_1806	0	0	0	0	0	0	0	0	0	0	0	0	0	0	0	0	0	0	0	0	0	0	0	1	0	0	0	0	0	0	0	0	0	0	0	1	0	0	0	0	0	0	0	0	0	0	0	0	0
OTU_764	0	0	1	0	0	1	0	0	0	0	0	1	0	0	0	1	1	1	1	0	0	0	1	0	0	0	0	1	0	1	0	0	0	0	0	1	1	1	0	3	0	0	0	0	0	1	0	0	0
OTU_1488	0	0	1	0	0	0	0	0	0	0	1	0	0	0	0	0	0	0	0	0	0	0	0	0	0	0	0	0	0	0	1	1	0	0	0	0	0	0	0	0	0	0	0	0	0	0	0	0	1
OTU_2098	0	0	0	0	0	0	0	0	0	1	0	0	0	0	0	0	0	0	0	0	0	0	0	0	0	0	0	0	0	0	0	1	0	0	0	0	0	0	0	0	0	0	0	0	0	1	0	0	0
OTU_2129	0	0	0	0	0	0	0	0	0	0	0	1	0	0	0	0	0	0	0	0	1	0	0	0	0	0	0	0	1	0	0	0	0	0	0	0	0	1	0	0	0	0	0	0	3	0	0	0	0
OTU_1658	0	0	0	0	0	2	0	0	1	0	0	1	0	0	0	0	0	1	0	0	0	0	0	0	0	0	1	0	0	0	0	0	1	0	1	0	1	0	0	0	0	1	0	0	1	0	0	0	0
OTU_1811	0	0	0	0	0	0	0	2	0	0	0	0	0	0	0	0	0	0	0	0	0	0	2	0	0	0	0	0	0	0	0	0	0	0	0	0	0	0	0	0	0	0	0	0	0	0	0	0	1
OTU_381	0	1	0	2	1	1	0	0	0	0	0	0	0	0	0	0	0	0	0	0	0	0	1	1	0	0	0	1	0	0	0	2	0	9	0	0	1	1	0	0	1	2	0	0	1	0	0	0	0
OTU_756	0	0	0	0	0	1	0	0	0	0	0	0	0	0	0	0	1	0	0	1	0	1	0	0	0	0	0	0	0	0	0	0	0	0	1	0	0	0	1	1	0	0	0	0	0	0	0	0	0
OTU_2167	0	0	0	0	0	0	0	0	0	0	0	0	0	0	0	0	0	0	0	0	0	0	0	0	0	0	0	0	0	0	0	0	0	0	0	0	0	0	0	0	0	0	0	0	0	0	0	0	0
OTU_2156	0	0	0	0	0	0	0	0	0	0	0	0	0	0	0	0	0	0	0	0	1	1	0	0	0	0	0	0	0	0	0	0	0	0	0	0	0	0	0	0	0	0	0	0	0	0	0	0	0
OTU_1255	0	1	0	0	1	0	0	1	0	0	0	0	2	0	1	0	1	1	1	0	0	0	0	0	0	0	0	1	0	0	2	1	0	0	1	0	0	1	0	0	1	1	1	0	0	0	2	0	2
OTU_1125	0	0	0	0	0	0	0	0	2	0	0	0	0	0	0	0	0	0	0	1	0	0	0	0	0	1	0	0	0	0	0	0	0	0	0	0	0	0	0	0	0	0	0	0	0	0	0	0	0
OTU_533	0	0	0	1	0	0	0	1	1	0	1	0	0	1	1	1	0	0	0	1	0	3	0	0	0	0	1	0	0	0	0	1	0	0	0	0	0	0	0	1	1	0	0	0	0	1	0	0	2
OTU_2143	0	0	0	0	0	0	0	0	0	0	0	0	0	0	0	0	0	0	0	0	0	0	0	0	0	0	0	1	0	0	0	0	0	0	0	0	0	0	0	0	0	0	0	1	0	0	0	0	0
OTU_2207	0	0	1	0	0	0	0	0	0	0	0	0	0	0	0	0	0	0	0	0	0	0	0	0	0	0	0	0	0	0	0	0	0	0	0	0	0	0	0	0	0	0	0	0	0	0	0	0	0
OTU_2184	1	0	0	0	0	0	0	0	0	0	0	1	1	0	0	0	0	0	0	1	1	0	0	0	0	1	0	0	0	0	0	0	0	0	0	0	0	0	0	0	1	0	0	0	0	0	1	0	0
OTU_1326	0	0	0	1	0	1	0	0	0	0	1	0	0	0	0	0	1	0	0	0	0	0	0	0	0	0	0	0	0	0	0	0	0	0	0	0	0	0	0	0	0	0	0	0	0	3	0	0	0
OTU_1306	0	0	1	1	0	0	0	0	1	0	0	0	1	0	0	0	0	0	0	0	0	1	0	0	0	1	0	0	1	0	0	0	0	0	1	0	0	0	1	0	0	0	0	0	1	0	0	0	1
OTU_781	0	1	1	0	0	0	0	0	0	0	0	0	0	0	2	0	0	0	0	0	0	0	0	0	0	0	0	0	1	0	1	0	0	0	0	1	0	0	0	0	0	0	0	0	0	0	0	0	0
OTU_1133	0	0	0	0	0	0	0	0	0	0	0	0	0	0	0	0	0	0	0	0	2	0	0	0	0	0	0	0	0	1	1	2	0	0	0	0	0	0	0	0	0	0	0	0	0	0	0	0	0
OTU_1670	0	0	0	0	0	0	0	1	0	0	0	0	0	1	0	1	0	0	0	0	0	0	0	0	0	0	0	0	1	0	0	1	0	0	0	0	0	0	0	0	0	0	0	0	0	0	0	0	0
OTU_292	0	1	0	3	0	2	0	0	1	1	0	0	0	0	0	0	0	2	0	0	0	0	0	0	3	0	0	2	0	0	0	2	0	0	0	0	0	2	0	0	0	1	0	1	0	1	0	0	0
OTU_2559	0	0	0	0	0	0	1	0	0	0	0	0	0	0	0	0	0	0	0	0	0	0	0	0	0	0	0	0	0	0	0	0	0	0	0	0	0	0	0	0	0	0	0	0	0	0	0	0	0
OTU_1072	0	0	0	1	0	0	0	0	0	0	0	0	1	0	0	0	0	0	0	0	0	0	0	0	1	0	0	0	1	0	0	0	0	0	0	0	0	0	0	0	0	0	0	0	0	0	0	0	0
OTU_1994	0	0	0	0	0	0	0	0	0	0	0	0	0	0	0	0	0	0	0	0	0	0	0	0	0	0	0	0	0	0	0	1	0	0	0	0	0	0	0	0	0	0	0	0	0	0	0	0	0
OTU_2063	0	0	0	0	0	0	0	0	0	0	1	0	0	0	0	0	0	0	0	0	0	0	0	0	0	0	0	0	0	0	0	0	0	0	0	0	0	0	1	0	0	0	0	0	0	1	0	0	0
OTU_913	0	1	0	0	0	0	0	0	0	1	1	0	0	0	0	1	0	0	1	0	0	0	0	0	0	0	0	0	0	0	1	2	0	1	0	0	0	1	0	0	0	0	0	0	0	1	0	1	1
OTU_1193	0	0	0	0	0	0	0	0	0	0	0	0	0	0	0	0	0	0	0	0	0	0	0	0	0	0	0	0	0	0	0	0	0	0	0	0	0	1	0	0	0	0	0	0	0	0	0	0	0
OTU_417	1	1	0	0	0	1	0	0	0	0	0	3	0	1	0	0	1	0	0	0	2	0	0	0	1	0	0	3	0	0	0	0	0	0	0	0	1	0	0	1	0	0	0	0	0	2	0	0	0
OTU_2068	1	0	0	0	0	0	0	0	1	0	0	0	0	0	0	0	0	1	0	0	0	0	1	0	0	0	0	0	0	0	0	0	0	0	0	0	0	0	0	0	0	0	2	0	0	2	1	0	0
OTU_1137	0	0	0	0	0	0	1	0	0	0	0	0	0	0	0	0	0	0	0	0	0	0	0	0	0	0	0	1	0	0	0	0	0	0	0	0	0	0	1	1	0	0	0	0	1	0	0	1	0
OTU_2131	0	0	0	1	0	0	0	0	0	0	0	0	0	0	0	0	1	0	0	0	0	1	0	0	0	0	0	0	0	0	0	0	0	0	0	0	0	1	0	0	0	0	0	0	0	0	0	0	0
OTU_1677	1	0	0	0	0	0	0	0	2	0	0	0	0	0	0	0	0	0	0	0	0	0	0	0	0	0	0	0	0	0	0	0	0	0	0	0	0	0	0	0	0	0	0	0	0	0	0	0	0
OTU_1417	0	0	0	0	0	0	0	0	0	0	0	0	0	1	0	0	0	0	0	0	0	0	0	0	1	0	0	0	0	0	0	0	0	0	0	0	0	0	0	0	0	0	0	0	0	0	0	0	0
OTU_1566	0	0	0	1	0	0	2	0	0	0	0	0	0	1	0	0	0	1	0	0	0	0	0	0	1	0	1	1	1	0	0	1	1	1	0	0	0	0	0	0	0	0	0	0	0	0	0	0	0
OTU_1358	0	0	0	0	0	2	0	0	0	2	0	0	0	0	0	0	0	0	0	0	0	0	0	0	0	0	0	1	0	0	0	0	0	0	0	0	0	0	0	0	0	0	0	0	0	0	0	0	0
OTU_1619	0	0	2	0	0	1	0	0	0	0	0	0	0	0	0	0	0	0	4	0	0	0	0	0	0	0	0	1	0	1	0	0	0	0	0	1	0	0	0	0	0	0	0	0	0	0	0	0	2
OTU_917	1	0	0	0	2	0	0	0	0	0	0	0	0	1	0	0	0	0	0	1	0	0	0	0	0	0	0	0	0	0	0	0	0	0	0	0	0	0	0	0	0	0	0	0	0	1	0	0	0
OTU_1799	0	0	0	0	0	0	3	0	0	0	0	0	0	0	0	0	0	0	0	0	0	0	0	0	0	0	0	0	0	0	0	0	0	0	0	0	0	0	0	0	0	0	0	0	0	0	1	0	0
OTU_2148	0	0	0	0	0	0	0	0	0	0	0	0	0	0	0	0	0	0	0	0	0	0	0	0	0	0	0	0	0	0	0	0	0	0	0	0	0	0	0	0	0	0	0	0	0	0	0	0	0
OTU_759	0	0	0	0	0	0	0	0	0	0	0	0	0	0	0	0	5	0	0	0	0	0	0	0	0	0	0	0	0	0	0	0	0	0	0	0	0	0	0	0	0	0	0	0	0	0	0	0	0
OTU_2147	0	0	0	0	0	0	0	0	0	0	0	0	0	1	0	0	0	0	0	0	0	0	0	0	0	0	0	0	0	0	0	0	0	0	0	0	0	0	0	0	0	0	0	0	0	0	0	0	0
OTU_2369	0	0	1	0	0	0	1	0	0	1	0	0	0	0	0	0	0	0	0	0	0	0	0	0	0	0	0	0	0	0	0	2	0	0	0	0	0	0	0	0	0	0	0	0	0	0	0	1	0
OTU_1609	0	0	0	1	0	0	1	0	1	0	1	0	0	0	0	0	0	0	0	0	0	0	0	0	0	0	0	2	0	0	0	1	0	0	0	0	0	1	0	0	0	0	0	0	0	0	0	0	0
OTU_1389	0	0	1	0	0	0	0	0	0	0	0	0	0	0	0	0	0	0	0	1	0	0	0	0	0	0	0	0	2	0	0	0	1	0	0	0	0	0	0	0	0	0	6	0	0	0	0	0	0
OTU_1345	0	0	0	0	0	0	0	0	0	0	0	0	0	0	0	0	0	0	0	3	0	0	0	0	0	0	0	0	0	0	0	0	0	0	0	0	0	0	0	0	0	0	0	0	0	0	0	0	0
OTU_1239	0	0	0	0	0	1	0	0	0	1	1	0	0	1	0	0	0	0	0	0	0	0	0	0	1	0	0	1	0	0	1	0	0	0	0	0	0	1	0	0	0	0	0	0	0	1	0	0	0
OTU_1435	1	0	0	0	0	0	0	0	0	0	0	0	0	0	0	0	0	0	0	0	0	0	0	0	0	0	0	0	0	0	0	0	0	0	0	0	0	0	0	0	0	0	0	0	0	0	0	1	0
OTU_963	1	0	1	0	0	0	1	0	0	1	1	0	0	0	0	0	0	0	0	0	0	0	0	0	0	1	0	0	0	0	0	0	0	1	0	0	0	0	0	0	0	0	0	0	0	0	0	0	0
OTU_2276	0	0	0	0	2	0	0	1	0	0	0	0	0	0	0	0	0	1	1	0	1	0	0	0	0	0	0	0	0	0	0	0	0	0	0	0	0	0	0	0	0	2	0	0	0	0	0	0	0
OTU_2308	0	0	1	0	0	0	0	0	0	0	0	0	0	0	0	0	0	0	0	0	0	0	0	0	0	0	0	0	0	0	0	0	0	0	0	0	0	0	0	0	0	0	0	0	0	0	0	0	0
OTU_1845	0	0	0	0	0	0	0	0	0	1	1	1	0	0	0	0	0	2	0	0	0	0	0	1	0	1	0	1	1	0	0	0	0	1	0	0	0	0	1	0	0	0	1	0	0	1	0	0	0
OTU_1963	1	0	1	0	0	0	1	0	0	0	0	0	0	0	0	0	0	0	0	0	0	0	0	0	0	0	0	0	0	0	0	0	0	0	0	0	0	2	0	0	0	0	0	1	0	0	0	0	0
OTU_2284	0	0	0	0	0	0	0	0	0	0	2	0	0	0	0	0	0	0	0	0	0	0	0	0	0	0	0	0	0	0	1	0	0	0	0	1	1	0	0	0	1	0	1	0	0	1	0	0	0
OTU_587	0	0	0	0	0	0	0	0	1	0	0	0	0	1	0	0	0	0	1	0	0	1	0	0	0	0	0	0	0	0	0	0	0	3	0	0	1	0	0	0	0	0	0	0	4	0	0	0	1
OTU_974	0	0	0	0	0	0	0	0	0	0	0	0	0	0	0	0	0	0	0	0	0	0	0	0	0	0	0	0	0	0	0	0	0	0	0	0	0	0	0	0	0	0	0	0	0	0	1	0	0
OTU_908	0	0	0	0	0	0	0	0	0	0	0	0	0	0	0	1	0	0	4	0	0	1	0	0	0	0	0	0	0	0	1	0	0	0	0	0	0	0	0	0	0	0	0	0	0	0	0	0	1
OTU_1669	0	0	0	0	0	0	0	1	0	0	3	0	0	0	0	0	0	0	0	0	0	0	0	0	0	1	0	0	0	0	0	0	0	0	0	0	0	0	0	0	0	0	0	0	0	0	0	1	0
OTU_1747	0	0	0	0	0	0	0	0	0	0	0	1	0	0	0	0	0	0	0	1	0	0	0	0	0	0	1	0	1	0	0	0	0	0	0	0	0	0	0	0	0	0	0	0	0	0	0	1	0
OTU_1754	0	1	0	0	0	0	0	0	0	0	0	0	0	0	0	0	0	0	0	0	0	0	0	1	0	0	0	0	1	0	0	0	0	0	0	0	0	0	0	0	1	0	0	0	0	0	0	0	0
OTU_2473	0	0	0	0	0	0	0	0	0	0	0	0	0	0	0	0	0	0	0	0	0	0	0	0	0	0	0	1	0	0	1	0	0	0	0	0	0	0	0	0	2	0	0	0	0	0	0	0	0
OTU_1460	0	0	0	0	0	0	1	0	0	0	1	1	0	0	0	0	0	0	0	0	0	0	0	1	0	0	0	0	3	0	0	1	0	0	0	0	0	0	2	0	0	0	0	1	0	0	0	0	0
OTU_1621	0	0	0	0	0	0	0	0	0	0	0	0	0	0	0	0	0	0	0	0	0	0	0	0	0	0	0	0	0	0	0	0	0	0	0	1	0	0	0	0	0	0	0	0	0	0	0	0	0
OTU_1832	0	0	0	0	0	0	0	0	0	0	0	0	0	0	1	0	0	0	0	0	0	0	0	0	0	0	0	0	0	0	0	0	0	0	0	0	0	0	0	0	0	0	0	1	0	2	0	0	0
OTU_1033	0	0	2	0	0	0	0	0	0	0	0	1	0	0	0	0	0	0	0	0	0	0	0	1	0	0	0	0	0	0	0	0	0	0	1	0	1	0	0	3	0	1	0	0	0	0	0	0	2
OTU_2500	0	0	0	0	0	0	0	0	0	0	0	0	0	0	0	0	0	0	0	0	0	0	0	0	0	0	0	0	0	0	0	1	0	0	0	0	0	0	0	0	0	0	0	0	0	0	0	0	0
OTU_1136	0	0	0	0	0	1	0	1	0	1	0	0	0	0	0	3	1	0	0	0	0	0	1	0	0	0	0	0	0	0	0	0	0	0	0	0	0	2	0	0	1	0	0	0	0	0	0	0	0
OTU_1497	0	0	0	0	0	0	0	0	0	0	0	0	0	0	0	0	0	0	0	0	0	0	0	0	0	0	0	0	0	0	0	0	0	4	0	0	0	0	0	0	0	0	0	0	0	0	0	0	0
OTU_1854	0	0	0	0	3	0	0	0	0	0	0	0	0	0	0	0	0	0	0	0	0	0	0	0	0	0	0	0	0	0	0	0	0	0	0	0	0	0	0	0	0	0	0	0	0	0	0	0	0
OTU_725	0	0	0	1	0	1	0	0	1	0	0	0	0	0	0	0	0	0	0	0	0	0	0	0	0	0	0	0	0	0	1	0	0	0	0	0	0	0	1	0	0	0	0	0	0	1	0	0	0
OTU_1331	0	0	0	0	0	0	1	0	0	1	0	0	0	0	0	0	0	0	0	0	0	0	0	0	1	1	0	0	0	0	0	0	0	0	0	0	0	0	0	1	0	0	0	0	0	0	2	0	0
OTU_826	0	1	0	0	0	0	0	0	0	0	0	0	0	0	0	0	0	0	0	1	0	0	0	0	0	0	0	0	0	0	0	0	0	0	0	0	0	0	0	0	0	0	0	0	0	0	0	0	0
OTU_1846	0	0	0	0	0	0	0	0	0	0	0	0	0	0	0	0	0	0	0	0	0	0	0	0	0	0	0	0	0	0	0	0	0	0	0	0	0	0	0	0	0	0	0	0	0	0	0	0	0
OTU_2393	0	0	1	0	0	0	0	0	0	0	0	0	0	0	0	0	0	0	0	0	0	0	0	0	0	0	0	1	0	0	0	0	0	0	0	0	0	0	0	0	0	0	0	1	0	0	0	0	0
OTU_2345	0	0	0	0	1	0	0	0	1	0	0	0	0	0	0	0	0	0	0	0	0	0	0	0	0	0	0	0	0	0	0	0	0	0	0	0	0	0	0	1	0	0	0	0	0	0	0	0	0
OTU_1704	0	0	0	0	0	0	1	0	0	0	0	0	0	0	0	0	0	1	0	0	0	0	0	0	0	0	0	0	0	0	0	0	0	1	0	0	0	0	0	0	0	0	0	0	0	0	0	0	0
OTU_458	0	0	3	1	1	1	0	0	1	0	2	0	0	0	0	0	0	0	0	0	0	0	0	0	0	0	0	0	0	0	0	0	0	0	0	0	0	0	0	0	1	1	0	0	1	1	1	0	0
OTU_739	0	0	0	0	1	0	0	0	0	0	0	0	0	0	0	0	1	0	0	0	0	0	0	1	0	0	0	0	1	0	0	0	0	0	2	0	0	0	0	0	0	0	0	0	0	0	1	3	0
OTU_732	0	1	1	0	0	0	0	0	0	0	0	0	0	0	0	0	0	0	0	0	0	0	0	0	0	0	2	0	0	0	0	0	0	0	0	0	1	0	0	0	0	0	0	0	0	0	1	0	0
OTU_1377	0	0	0	0	0	0	0	0	0	1	0	0	0	0	0	0	0	0	0	0	0	0	0	0	0	0	0	0	1	0	0	0	0	0	0	0	0	0	0	0	1	0	0	0	0	0	0	0	0
OTU_1011	0	0	2	0	0	0	0	0	0	0	0	0	0	1	0	0	1	0	1	0	0	0	0	0	0	0	0	0	0	0	1	2	0	0	0	0	0	0	0	1	0	0	1	0	0	0	0	0	2
OTU_1498	0	0	0	1	0	0	0	0	0	0	0	0	0	0	0	0	0	0	0	0	1	0	0	0	0	0	0	0	0	0	0	0	0	0	0	0	0	0	1	0	0	0	0	0	0	0	0	0	0
OTU_2149	0	0	0	0	0	0	0	0	0	0	0	0	0	0	0	0	0	0	0	0	0	0	0	0	0	0	0	0	1	0	0	1	0	1	0	0	0	0	0	0	0	0	0	0	0	0	0	0	0
OTU_941	0	0	0	0	0	0	0	0	1	0	0	0	0	0	0	0	0	0	0	1	0	0	0	0	1	0	0	0	0	0	0	0	0	0	0	0	0	0	0	0	1	0	0	1	1	1	0	0	0
OTU_916	0	0	0	0	1	0	0	0	0	0	0	0	1	0	0	3	0	0	0	0	1	0	0	0	0	2	1	0	0	0	0	0	0	0	0	0	0	0	0	1	0	0	0	0	0	1	0	0	0
OTU_2075	0	0	0	0	1	0	0	0	0	0	0	1	0	0	0	0	0	0	0	0	0	0	0	1	0	0	0	0	0	0	0	0	0	0	0	0	0	0	0	0	2	0	0	0	0	0	0	0	0
OTU_1007	0	1	0	0	0	0	0	2	0	0	0	0	0	0	0	0	0	0	0	0	0	1	0	0	0	0	0	0	0	1	0	1	1	0	0	0	2	0	0	0	0	0	0	0	0	0	0	1	0
OTU_1665	0	1	0	0	0	1	0	0	0	0	1	0	0	0	0	1	0	0	0	0	0	0	0	0	0	0	1	0	0	0	0	0	0	0	0	0	0	0	0	1	0	0	0	0	0	0	0	0	0
OTU_657	1	1	0	0	0	0	0	0	0	0	0	1	0	0	0	0	0	1	0	0	0	1	0	1	1	0	0	1	0	0	0	0	0	0	0	0	0	1	0	0	0	0	0	0	0	0	0	1	0
OTU_1848	0	0	0	0	0	0	0	0	0	0	0	0	0	0	0	0	0	0	0	0	0	0	0	0	0	0	0	0	0	0	0	0	0	0	0	0	0	1	0	0	0	0	0	0	0	0	0	0	0
OTU_1705	0	0	0	0	0	0	0	0	0	0	0	0	0	0	0	0	0	0	1	0	0	0	0	0	0	0	1	0	0	1	1	0	0	0	0	0	0	0	0	0	0	0	0	0	0	0	0	1	0
OTU_1379	0	0	0	0	0	0	0	0	0	0	0	0	0	0	0	0	0	0	0	0	0	0	0	0	0	0	0	0	0	0	0	0	0	0	0	0	0	0	0	0	0	0	0	0	0	0	0	0	0
OTU_2206	0	0	0	0	0	0	0	0	0	1	0	0	0	0	0	0	0	0	0	0	0	0	0	0	0	0	0	0	0	1	0	0	0	2	0	0	0	0	0	0	0	0	0	0	0	0	0	0	0
OTU_878	0	0	0	0	0	0	0	0	0	0	0	0	0	0	0	0	0	0	0	0	0	0	1	0	0	0	0	0	0	0	0	0	0	1	0	0	1	0	0	0	0	1	0	1	1	0	0	0	0
OTU_2257	0	0	0	0	0	0	0	0	0	0	0	0	0	0	0	0	0	0	0	1	0	0	0	0	0	0	0	0	0	1	0	0	0	1	0	0	0	0	0	0	0	0	0	0	0	0	0	0	0
OTU_821	0	0	0	0	0	0	0	0	0	0	0	0	0	0	0	0	0	0	0	0	0	0	0	0	0	0	0	0	0	0	0	0	0	4	0	0	0	0	0	0	0	5	0	0	0	0	0	0	0
OTU_774	0	0	0	0	0	0	0	0	0	0	2	0	0	0	0	0	0	0	0	0	0	0	0	1	0	0	0	0	0	0	0	0	0	0	0	0	2	0	0	0	0	1	0	0	0	0	0	0	1
OTU_719	0	0	0	0	1	1	0	0	0	0	0	2	0	0	1	0	0	0	1	0	0	0	0	0	0	0	0	0	0	0	0	1	0	1	0	2	0	1	0	0	0	0	0	0	0	0	0	0	0
OTU_735	0	0	0	0	0	0	0	0	0	0	0	0	0	0	0	0	1	0	0	0	0	0	0	0	0	0	0	0	1	0	1	1	0	2	0	0	1	0	0	0	0	2	0	1	0	0	0	0	0
OTU_2357	0	0	0	0	1	0	0	0	0	0	0	0	0	1	0	0	0	0	0	0	0	0	1	1	0	0	0	0	0	0	0	1	0	0	1	0	1	0	0	0	0	0	1	1	0	0	0	0	0
OTU_738	1	0	0	0	1	0	0	0	0	0	0	0	0	0	0	0	1	0	1	0	0	1	0	0	1	0	0	0	0	0	0	0	0	0	0	0	0	0	0	0	0	0	0	0	0	0	1	0	0
OTU_1235	0	0	0	0	0	0	0	0	0	0	0	0	0	0	0	1	4	0	0	0	0	0	0	0	0	0	0	0	0	0	0	0	0	0	0	0	0	0	0	0	1	0	0	0	0	0	0	0	0
OTU_2013	1	0	0	0	0	0	0	0	0	0	0	0	0	0	0	0	0	0	0	0	0	0	0	0	0	0	0	0	0	0	0	0	1	0	0	0	0	0	0	0	0	0	0	0	0	0	0	0	0
OTU_804	0	0	0	0	2	0	0	0	1	0	0	0	0	0	0	0	0	0	0	0	0	0	0	0	2	0	0	0	1	0	0	0	1	1	0	0	0	0	0	0	0	0	0	0	0	1	0	0	0
OTU_559	1	0	1	1	0	0	0	1	0	0	0	0	0	0	0	0	0	0	0	2	0	2	0	0	0	0	2	0	0	0	0	0	0	0	0	0	1	1	0	0	2	0	0	0	0	1	0	0	0
OTU_796	0	0	1	0	1	0	0	0	2	0	2	0	0	2	0	1	2	1	2	0	0	0	0	1	0	0	0	0	0	1	2	0	1	0	3	2	0	0	0	1	0	0	0	0	0	0	0	0	0
OTU_2289	0	0	0	0	0	0	0	0	0	0	0	1	0	0	0	0	0	0	0	0	0	0	0	0	0	0	0	0	0	0	0	0	0	0	0	0	0	0	0	0	0	1	0	0	0	0	0	0	0
OTU_2146	0	0	0	0	0	1	0	0	0	0	1	0	0	0	0	0	0	0	0	0	0	0	0	0	0	0	0	0	0	0	0	0	0	0	0	0	0	0	0	0	0	0	0	0	0	0	0	0	0
OTU_1122	0	0	0	1	0	0	0	0	0	0	0	0	0	0	0	0	0	1	1	0	0	0	0	0	0	0	0	0	0	0	0	0	0	0	0	0	0	1	0	1	0	0	0	0	0	0	0	0	1
OTU_1628	0	0	0	0	0	0	0	0	0	0	0	0	0	0	0	0	0	0	0	0	0	0	0	0	0	0	0	0	0	0	1	0	0	0	0	0	0	0	0	0	0	0	1	0	0	0	0	0	0
OTU_847	0	0	0	0	0	0	0	0	0	0	0	0	1	0	0	1	0	0	0	0	0	0	0	2	0	0	0	0	0	1	2	0	0	0	0	0	0	0	0	1	0	0	0	0	0	0	0	0	0
OTU_2174	0	0	0	0	0	0	0	0	0	0	0	0	0	0	0	0	0	0	0	1	0	0	1	0	0	0	0	0	0	0	0	0	0	1	0	0	0	0	0	0	0	0	0	0	0	0	0	0	0
OTU_663	2	0	0	0	1	2	2	0	1	0	0	0	2	1	0	0	2	0	0	1	0	0	1	0	0	0	1	0	0	0	0	2	0	0	0	0	0	0	0	1	0	0	0	0	0	0	0	1	0
OTU_1365	0	0	0	0	0	0	0	0	0	0	0	0	0	0	0	0	0	0	0	0	0	0	0	0	0	0	0	0	0	0	0	0	0	1	0	1	0	0	0	0	0	0	0	0	0	0	0	0	0
OTU_1541	0	0	0	1	0	0	0	0	0	0	0	0	0	0	0	1	1	0	1	0	0	0	0	0	0	0	0	0	0	0	0	0	0	0	0	0	0	0	0	0	0	0	0	0	0	0	1	0	0
OTU_1467	0	0	0	1	0	0	0	0	0	0	0	2	0	0	0	0	0	0	0	0	0	0	0	0	0	0	0	0	0	0	0	0	0	0	0	0	0	0	0	0	0	0	0	0	0	0	0	0	0
OTU_1807	0	0	0	0	0	0	0	0	0	0	0	0	0	0	0	2	0	0	0	0	0	0	0	0	0	0	0	0	0	1	0	0	0	0	0	0	0	0	0	0	0	0	0	0	0	0	0	0	0
OTU_1579	0	0	0	0	0	0	0	0	1	0	0	0	0	0	0	0	0	0	0	0	0	0	1	0	0	1	0	0	0	0	0	0	0	0	0	0	0	1	0	0	0	0	0	0	0	0	0	0	0
OTU_2478	0	0	0	0	0	0	0	0	0	0	0	0	0	0	0	0	0	0	1	1	0	0	0	0	0	0	0	0	1	0	0	0	0	0	0	0	0	0	0	0	0	0	0	0	0	0	0	0	0
OTU_1612	0	0	0	0	0	0	0	0	0	0	0	0	0	1	0	0	0	0	1	0	2	2	0	2	0	0	0	0	0	1	0	0	0	0	0	0	0	0	0	0	0	0	0	0	0	0	0	0	0
OTU_864	0	0	0	0	0	0	0	0	0	0	0	1	0	0	0	0	0	0	0	0	0	0	0	0	0	1	0	0	0	0	0	0	0	0	0	2	0	0	0	0	0	0	0	0	0	0	0	0	0
OTU_2125	0	0	0	0	0	0	0	0	0	0	0	0	0	0	0	0	0	0	0	0	0	0	0	0	0	0	0	0	0	0	0	0	0	0	0	0	0	0	0	0	0	0	0	0	0	0	0	0	0
OTU_1690	0	0	0	0	0	0	0	1	0	0	0	0	0	0	0	0	0	0	1	0	0	0	0	0	0	0	0	0	0	0	0	0	0	0	0	0	0	0	1	0	0	0	0	0	0	0	0	0	0
OTU_1542	0	0	0	0	0	0	0	0	0	0	0	0	0	0	0	0	0	0	0	0	0	0	0	0	0	0	0	0	0	0	0	0	0	0	0	0	0	0	0	0	0	0	0	0	0	0	0	0	1
OTU_2448	0	0	0	1	0	0	0	0	0	0	0	0	0	0	0	0	0	0	1	0	0	0	0	0	0	0	0	0	0	0	0	0	0	0	0	0	0	0	0	0	0	0	0	0	0	0	0	0	0
OTU_1740	0	0	0	0	0	0	0	0	0	0	0	0	0	0	0	0	1	0	0	0	0	0	0	0	0	0	0	0	0	0	0	0	0	0	0	0	0	0	0	0	0	0	0	0	0	0	0	0	0
OTU_1106	0	0	0	0	0	0	0	0	0	0	0	0	0	0	0	0	0	0	1	0	0	0	0	0	0	0	0	0	1	0	0	0	5	0	0	0	0	0	0	0	0	0	0	0	0	0	0	0	0
OTU_1009	0	0	2	0	0	0	0	0	0	0	0	0	0	0	0	0	0	0	0	0	0	0	0	0	0	0	0	0	0	0	0	0	0	0	0	0	0	0	0	0	0	0	0	0	0	0	0	0	2
OTU_435	0	0	0	0	2	0	1	0	0	0	1	2	0	1	0	1	2	0	0	0	0	0	0	0	0	2	0	0	0	0	1	0	0	0	0	0	1	0	1	0	0	0	0	0	0	1	1	0	0
OTU_1646	0	0	0	0	0	0	0	0	0	0	0	0	0	0	0	0	0	0	0	0	0	0	0	0	0	0	0	0	0	0	0	0	0	1	0	0	0	0	0	0	0	0	0	0	0	0	0	0	0
OTU_2433	0	0	0	0	0	0	0	2	0	0	0	0	0	0	0	0	0	0	0	0	0	0	0	0	0	0	0	0	0	0	0	0	0	0	0	0	0	0	0	0	0	0	0	0	0	0	0	0	0
OTU_1691	0	0	1	0	0	0	0	0	0	1	1	0	1	0	0	0	2	0	0	0	0	1	0	0	0	0	1	0	0	1	1	1	2	0	0	1	0	0	0	0	1	0	0	0	0	0	0	0	0
OTU_1513	0	0	0	0	0	0	0	0	0	0	0	0	0	0	3	0	0	0	1	1	2	0	0	1	0	0	0	0	0	0	0	0	0	0	0	1	0	0	0	0	1	0	0	1	0	1	0	1	0
OTU_1626	0	0	0	0	0	0	0	0	0	0	0	0	0	0	0	0	0	0	0	0	0	0	0	0	0	0	0	0	0	0	0	0	0	0	0	0	0	0	0	2	0	0	0	0	0	0	0	0	0
OTU_768	1	0	0	0	1	1	0	2	0	0	0	0	2	0	0	0	0	0	1	1	0	0	1	2	0	1	0	0	0	0	0	0	0	0	1	0	0	1	0	0	1	1	4	2	0	0	0	0	1
OTU_1232	0	0	1	0	0	0	0	0	0	0	0	0	2	0	0	0	0	0	1	0	0	1	1	0	0	0	1	0	0	0	0	0	1	0	1	0	0	0	0	0	1	0	0	0	0	0	0	0	0
OTU_347	0	0	0	0	2	1	1	2	0	1	0	0	0	0	0	0	1	0	1	0	0	1	0	2	0	1	3	0	0	1	0	1	0	0	0	0	0	5	1	0	0	0	0	0	1	0	1	2	0
OTU_2139	0	0	0	0	0	0	0	0	0	0	0	0	0	0	0	0	0	0	0	0	0	0	0	0	0	0	0	0	0	0	0	0	0	0	0	0	0	0	0	0	0	0	0	0	0	0	0	0	0
OTU_2112	0	0	0	0	0	0	0	0	0	0	0	0	0	0	0	1	0	0	0	0	0	0	0	0	0	0	0	0	0	0	0	0	0	0	0	0	0	0	0	1	0	0	0	0	0	0	0	0	0
OTU_2435	0	0	0	0	0	0	0	0	0	0	1	1	0	0	1	0	0	0	0	0	0	0	0	0	0	0	0	1	0	0	0	0	0	0	0	0	0	1	0	0	0	0	1	0	0	0	0	0	0
OTU_1729	0	0	0	0	0	0	0	1	0	0	0	0	0	0	0	0	0	0	0	0	0	0	0	0	0	0	0	0	0	0	0	0	0	0	0	0	0	0	0	0	0	3	0	0	0	0	0	0	0
OTU_1530	0	0	0	0	0	0	0	0	0	0	0	0	0	0	0	0	0	1	0	0	0	0	0	0	0	0	0	1	0	0	0	0	0	1	2	0	0	0	1	0	0	0	0	0	0	0	0	0	0
OTU_668	0	0	0	0	1	0	0	4	0	0	0	2	1	0	0	1	1	0	0	1	0	0	0	0	0	0	1	0	2	1	1	0	0	1	0	2	1	0	0	1	1	0	2	0	0	0	0	0	1
OTU_1764	0	0	0	0	0	0	0	0	0	0	0	0	0	0	0	0	0	0	1	1	0	0	0	0	0	0	0	0	0	0	0	0	0	1	0	0	0	0	0	0	0	0	0	0	0	2	0	0	0
OTU_947	2	0	0	0	0	0	0	0	0	0	0	1	0	0	0	0	0	1	0	0	0	0	0	0	0	0	0	0	0	0	0	0	0	0	0	0	0	1	0	1	0	0	0	0	0	0	1	1	0
OTU_1341	0	0	0	0	0	0	0	1	0	0	1	0	0	1	0	1	0	0	0	0	0	0	0	0	0	0	0	0	0	0	0	0	0	0	0	0	0	0	0	0	0	0	0	0	0	0	0	0	0
OTU_571	0	0	0	0	0	1	0	0	0	0	0	0	1	0	1	0	0	0	0	0	0	0	0	0	0	0	0	0	0	0	0	0	1	1	0	0	1	0	0	1	0	0	0	0	0	0	0	0	0
OTU_1284	0	1	0	0	0	0	0	0	0	1	0	0	0	0	0	0	0	0	0	0	0	0	0	0	0	0	0	0	0	0	0	0	0	0	0	0	0	0	0	0	0	0	0	0	0	1	0	0	0
OTU_2341	0	0	0	0	0	0	0	0	0	0	0	0	0	0	0	0	0	0	0	0	0	0	0	0	0	0	0	0	0	0	0	0	0	0	0	0	0	0	0	0	0	0	0	0	0	0	0	0	0
OTU_894	2	1	1	0	1	0	1	2	0	0	0	0	0	2	0	2	0	0	0	0	1	0	1	0	0	1	0	0	1	2	0	0	1	0	2	0	0	0	0	0	2	0	0	1	1	1	0	1	1
OTU_2253	0	0	0	0	0	0	0	0	0	0	0	0	0	0	0	0	0	0	0	0	0	0	0	0	0	0	0	0	0	1	0	0	0	0	0	0	0	0	0	0	0	1	0	0	0	0	0	0	0
OTU_962	0	0	0	0	1	0	0	0	0	0	0	0	0	0	0	0	1	0	0	0	0	0	2	0	0	0	0	0	0	0	0	0	0	0	0	0	0	1	0	0	0	0	0	1	0	0	0	0	0
OTU_709	0	0	0	0	0	0	0	0	0	0	0	3	0	2	0	0	0	0	0	0	0	0	0	0	0	0	0	0	1	0	0	0	0	0	0	0	0	0	0	0	0	0	0	0	0	1	0	0	0
OTU_1905	0	0	1	0	0	0	0	0	0	0	0	0	0	1	0	0	0	0	0	0	0	0	0	0	0	0	0	0	0	0	0	0	0	0	0	0	0	0	0	0	0	0	0	0	0	0	0	0	1
OTU_2231	2	0	0	0	0	0	0	0	1	0	0	0	0	0	0	0	0	0	3	0	0	0	0	0	0	0	1	0	0	0	0	0	0	0	0	0	1	0	0	0	0	0	1	1	0	1	1	0	0
OTU_1870	0	0	0	0	0	0	0	3	0	0	0	0	0	0	0	0	0	0	0	0	0	0	0	0	0	0	0	0	0	0	0	0	0	0	0	0	0	0	0	0	0	0	0	0	0	0	0	0	0
OTU_570	1	0	0	2	0	0	7	0	2	0	0	1	0	0	3	0	0	0	0	0	0	0	0	0	0	2	0	2	0	0	0	0	0	3	0	0	0	3	0	0	0	0	0	1	0	0	0	0	0
OTU_1023	1	0	0	0	0	0	0	0	0	0	0	0	0	0	3	0	0	0	0	0	0	0	0	0	0	0	0	0	0	0	0	0	0	0	0	0	1	0	0	0	0	0	0	0	0	0	0	0	0
OTU_2408	0	0	0	0	0	0	0	0	0	0	0	0	0	0	0	0	0	0	1	0	1	1	0	0	0	0	0	0	0	0	0	0	0	0	0	0	0	0	0	0	1	0	0	0	0	0	0	0	0
OTU_2457	0	0	0	0	0	1	0	0	0	0	0	0	0	0	0	0	0	0	0	0	0	0	0	0	0	0	0	0	0	0	0	0	0	0	0	0	0	0	0	0	0	0	0	0	0	0	0	0	0
OTU_2318	0	0	0	0	0	1	0	0	0	0	0	0	0	0	0	0	0	0	0	0	2	0	0	0	2	0	0	0	0	0	0	0	1	0	0	1	0	1	0	0	0	0	0	0	2	0	0	0	0
OTU_615	1	0	0	0	0	0	0	0	0	1	1	0	0	0	1	0	0	1	0	0	0	0	1	2	0	1	0	0	0	0	0	0	0	0	2	0	0	0	0	0	0	0	0	2	0	0	0	0	1
OTU_1874	0	0	0	0	0	0	0	0	0	0	0	0	0	0	0	0	0	1	0	0	0	0	0	0	0	0	0	0	0	0	0	1	0	0	0	0	0	0	0	0	0	0	0	0	0	0	0	0	0
OTU_2064	0	0	0	0	0	0	0	0	0	0	0	0	0	0	0	0	0	0	0	0	0	0	0	0	0	0	0	0	0	0	0	0	0	0	0	0	1	0	0	0	0	0	0	0	1	0	0	0	0
OTU_1923	0	0	0	0	0	0	0	0	0	0	0	0	0	0	0	0	0	0	0	0	0	0	0	0	0	1	0	0	0	0	0	0	0	0	0	0	0	0	0	0	0	0	0	0	0	0	0	0	0
OTU_2097	0	0	0	1	1	0	1	1	0	0	0	0	0	0	0	1	0	0	0	2	0	0	2	0	0	3	0	0	0	0	0	0	0	0	0	0	0	0	1	0	0	0	0	0	0	0	0	0	0
OTU_1588	0	0	0	0	0	0	0	0	0	0	0	0	0	0	5	0	0	0	0	0	0	0	0	0	0	0	0	0	0	0	0	0	0	0	0	0	0	0	0	0	0	0	0	0	0	0	0	0	0
OTU_1124	0	0	0	0	0	0	0	0	0	0	1	0	1	1	0	0	0	0	0	0	0	0	0	0	0	0	0	0	0	0	0	1	0	0	0	0	0	0	1	0	1	0	0	0	0	0	0	0	0
OTU_1055	0	0	0	1	0	0	0	0	1	1	0	0	0	0	0	0	0	1	0	1	0	0	0	0	0	0	0	0	0	0	0	0	0	0	0	0	0	0	0	0	0	1	0	0	0	1	0	0	0
OTU_1793	0	0	0	0	1	0	0	0	0	0	0	1	0	0	0	0	0	0	0	0	0	0	0	0	1	0	0	0	0	0	0	0	0	0	0	0	0	0	0	1	1	0	0	1	0	0	0	0	0
OTU_1582	0	0	0	0	0	0	0	0	0	0	0	0	0	0	0	0	0	0	0	0	0	0	0	0	0	0	0	0	0	0	0	0	0	0	0	0	0	0	0	0	0	0	0	0	0	0	0	0	0
OTU_2043	0	0	0	0	0	1	0	0	0	0	0	0	0	0	0	0	0	0	0	0	1	0	0	1	0	0	1	0	0	0	0	1	0	0	0	0	0	0	0	0	0	1	0	0	0	0	0	1	0
OTU_2555	0	0	0	0	0	0	0	0	0	0	0	0	0	0	0	0	0	0	0	0	0	0	0	0	0	0	0	0	0	0	0	0	0	0	0	0	0	0	0	0	0	0	0	0	0	0	0	0	0
OTU_1948	0	0	0	0	1	0	0	1	0	0	0	0	0	0	0	0	0	0	0	0	0	0	1	0	0	1	0	0	0	0	0	2	0	0	0	0	0	0	0	0	0	0	0	0	0	1	0	0	0
OTU_1304	0	0	0	2	0	0	0	1	0	0	0	0	1	0	0	0	0	0	0	0	0	0	0	0	0	0	0	0	0	0	0	0	0	0	0	0	0	0	0	0	0	0	0	0	0	0	0	0	1
OTU_1913	0	1	0	0	0	0	0	0	1	0	0	0	0	0	0	0	0	0	0	0	0	0	0	0	0	0	0	0	0	0	1	0	0	0	0	0	1	0	0	0	0	0	0	0	0	0	0	0	1
OTU_1765	0	0	0	2	0	0	0	0	0	0	0	1	0	0	0	2	0	0	0	1	0	0	0	0	0	0	0	0	0	0	0	0	0	0	0	0	0	0	0	0	0	0	0	0	0	0	2	0	0
OTU_809	0	1	0	0	0	0	0	0	0	0	0	0	0	0	0	0	1	0	0	0	0	0	0	1	0	0	0	0	0	0	0	0	0	0	0	1	0	0	0	0	0	3	0	0	0	0	0	0	0
OTU_1286	0	0	0	0	0	0	0	0	0	0	0	0	0	0	0	0	0	0	0	0	0	0	0	0	0	0	0	0	0	0	0	0	0	0	0	0	0	0	0	0	0	4	0	1	0	0	0	0	0
OTU_1479	0	0	0	0	0	0	0	0	0	0	1	0	0	1	0	0	0	0	0	0	0	0	0	0	0	0	1	0	0	0	0	0	0	0	0	0	0	0	0	0	0	0	0	0	0	0	0	0	0
OTU_2414	0	0	0	0	0	0	0	0	0	0	0	0	0	0	0	0	0	0	0	0	0	0	0	0	0	0	0	0	0	0	0	0	2	0	0	0	0	0	0	0	0	0	0	0	0	0	0	0	0
OTU_2009	0	0	0	0	0	0	0	2	0	0	0	0	0	0	0	0	0	0	0	0	0	0	0	0	0	0	0	0	0	0	0	0	0	0	0	0	0	0	0	0	0	0	0	0	0	0	1	0	0
OTU_1668	0	0	0	0	0	0	0	0	1	0	0	0	0	0	0	0	0	0	0	0	0	0	0	0	0	0	0	0	0	1	0	0	0	0	0	0	0	0	0	0	0	0	0	0	0	0	0	0	0
OTU_2210	0	0	0	0	0	0	0	0	0	0	0	0	0	0	0	0	0	0	0	0	0	0	0	0	0	0	0	0	0	0	0	0	0	0	0	0	0	0	0	0	0	0	0	0	0	0	0	0	0
OTU_1689	0	0	0	0	0	0	0	0	0	0	0	0	1	0	1	0	1	0	0	0	0	0	0	1	0	0	0	1	0	0	0	0	0	0	0	0	0	0	0	0	0	0	0	0	0	0	0	0	0
OTU_626	0	0	0	0	0	0	1	0	0	0	0	1	0	0	0	0	0	2	0	0	0	0	0	1	0	0	0	0	1	0	0	0	0	0	0	0	0	3	4	0	0	0	0	2	0	0	1	0	0
OTU_1434	0	0	0	0	0	0	0	0	0	0	0	0	0	0	0	0	0	0	0	0	0	1	0	0	0	0	0	0	0	0	0	0	0	1	0	0	1	0	0	0	0	0	0	0	0	0	0	0	0
OTU_1487	0	1	1	0	0	0	0	0	0	0	0	0	0	0	0	0	0	1	0	0	2	0	0	0	0	0	0	0	0	0	0	0	0	1	0	0	0	0	0	0	0	0	0	0	0	0	0	0	1
OTU_1168	0	1	0	0	0	0	0	0	0	0	1	0	0	0	0	0	0	0	1	0	0	0	0	1	0	0	0	0	0	0	0	0	0	0	1	0	0	0	0	0	0	0	0	0	0	0	0	0	0
OTU_2055	0	0	0	0	0	0	2	1	1	0	0	0	0	0	0	0	0	0	0	0	0	0	0	0	0	0	0	0	1	0	0	0	0	0	0	0	0	1	0	0	0	0	0	0	0	2	0	0	0
OTU_1634	0	2	0	0	0	1	0	0	0	0	3	0	0	1	0	0	0	0	0	0	0	0	0	0	0	0	0	0	0	0	0	0	0	0	0	0	0	0	2	0	0	0	0	0	0	0	0	0	0
OTU_1933	0	0	0	0	0	0	0	0	0	1	0	0	0	0	0	0	0	1	0	0	0	0	0	0	0	0	0	0	0	1	0	0	0	0	0	0	0	1	0	0	0	0	0	1	1	0	0	0	0
OTU_1828	0	0	0	0	1	0	0	0	0	0	0	1	0	1	0	0	0	0	1	0	0	0	0	1	0	0	1	0	0	0	0	0	0	1	0	0	0	0	0	0	0	0	0	0	1	0	0	0	0
OTU_1021	0	1	0	0	0	0	0	3	0	0	0	0	0	0	0	0	0	0	0	1	1	0	0	0	0	0	0	0	0	0	0	0	0	0	1	0	0	0	0	0	0	0	0	0	0	0	0	0	0
OTU_1604	0	0	0	0	0	0	0	0	0	0	0	0	0	0	0	0	1	0	0	0	0	1	0	0	0	0	0	0	0	1	0	1	0	0	0	0	0	0	0	2	0	0	1	1	1	0	0	0	0
OTU_2030	0	0	0	0	0	0	0	0	0	0	0	0	0	0	0	0	0	0	0	0	0	0	0	0	0	0	0	0	0	0	0	0	0	0	0	0	0	0	0	0	0	0	0	0	0	0	0	0	0
OTU_1153	1	0	1	0	0	0	0	1	0	0	0	0	0	1	0	0	0	0	0	0	0	0	1	0	0	0	0	0	0	0	0	0	0	0	0	0	1	0	2	0	0	0	2	0	0	0	1	1	0
OTU_900	1	0	0	0	0	0	1	1	0	0	1	0	0	0	0	0	0	0	0	0	0	0	0	0	0	0	0	0	0	0	0	0	0	0	0	0	1	0	1	0	0	1	1	0	1	0	0	0	1
OTU_1225	0	0	1	0	0	0	0	1	2	1	0	0	0	0	0	0	1	0	0	0	0	0	0	0	0	0	0	0	1	0	0	0	0	0	0	0	0	0	1	0	0	0	1	0	1	0	0	0	0
OTU_1535	0	0	0	0	0	0	0	0	0	0	0	0	0	0	0	0	0	0	0	0	0	0	0	0	2	0	0	0	0	0	0	0	0	0	0	0	0	0	0	0	0	0	0	0	0	0	0	0	0
OTU_2120	0	0	0	0	0	0	0	0	0	0	0	0	0	0	0	0	0	0	1	0	0	1	0	0	0	0	0	0	0	0	0	0	0	0	0	0	0	0	0	0	0	0	0	0	0	0	0	0	0
OTU_979	0	0	0	0	1	0	0	0	0	0	0	0	0	0	0	0	0	0	0	0	0	0	0	0	0	0	0	0	0	0	0	0	1	0	0	0	0	0	0	0	0	0	0	0	0	0	0	0	0
OTU_1732	0	0	0	0	0	0	0	0	0	0	0	0	1	0	0	0	0	0	0	1	0	0	0	0	0	0	0	0	0	0	0	0	0	0	0	0	0	0	0	0	0	0	0	0	0	0	0	0	0
OTU_973	4	0	0	1	0	0	0	0	0	0	2	0	0	0	0	0	1	0	0	1	2	0	0	0	1	0	0	0	0	0	0	1	1	0	2	0	0	0	0	0	0	0	1	1	0	0	0	0	2
OTU_785	0	0	0	0	0	0	0	0	0	1	0	0	0	0	0	0	0	0	0	0	0	0	0	0	0	0	0	0	0	0	0	0	1	0	0	0	2	0	0	0	0	0	0	0	0	0	0	0	0
OTU_509	1	1	0	0	0	0	0	0	0	1	0	0	0	0	0	0	0	1	0	0	0	0	0	0	0	0	0	1	0	0	0	0	0	1	0	0	1	0	0	0	0	5	0	0	0	0	1	0	0
OTU_1830	0	0	0	0	0	0	0	0	0	0	0	2	0	0	0	0	0	0	1	0	0	0	0	0	0	0	0	0	0	0	0	0	0	0	0	0	0	0	0	0	0	0	0	0	0	0	0	0	0
OTU_1302	0	0	1	0	0	0	0	0	0	0	0	0	0	0	0	0	1	0	0	0	0	1	0	0	0	0	0	0	0	0	0	0	0	0	0	1	0	0	0	0	0	0	0	0	1	0	0	0	0
OTU_820	0	0	0	0	0	0	0	0	0	0	0	0	0	0	0	0	0	0	0	0	0	0	0	0	0	1	0	0	0	0	0	0	0	0	0	1	0	0	0	0	0	0	0	0	2	0	1	0	0
OTU_748	0	0	1	0	0	0	0	0	0	0	0	0	2	1	0	0	1	0	0	1	0	0	0	0	0	0	5	1	0	0	1	0	0	0	5	0	0	0	0	0	0	0	0	0	0	0	0	2	2
OTU_1788	0	0	0	0	0	0	0	0	0	0	0	0	0	0	0	1	2	0	0	0	0	0	0	0	0	0	0	0	0	0	0	0	0	0	0	0	0	0	1	0	0	0	0	0	0	0	0	0	0
OTU_892	0	0	0	0	0	0	0	0	0	0	1	1	0	0	1	0	0	0	0	0	0	0	0	0	0	0	0	0	1	0	0	0	0	0	0	2	0	0	0	0	0	0	0	0	0	0	0	0	0
OTU_2118	0	0	0	0	0	0	0	0	0	0	0	0	0	1	0	0	0	0	0	0	1	0	0	0	0	0	0	0	0	0	0	0	0	0	0	0	0	0	0	0	0	0	0	0	0	0	0	1	0
OTU_1285	0	0	0	0	0	0	0	0	0	0	0	1	0	0	0	0	0	0	0	0	0	0	0	0	0	0	0	0	0	0	0	0	0	0	0	0	0	0	0	0	0	0	0	0	0	0	0	0	0
OTU_2194	0	0	1	0	0	0	0	0	0	0	0	0	0	0	0	0	0	0	0	0	0	2	0	0	0	0	0	0	0	0	0	0	0	0	0	0	0	0	0	0	0	0	3	0	0	0	0	0	2
OTU_2238	0	0	0	0	0	0	0	0	0	0	0	0	0	0	0	2	0	0	0	0	0	3	0	0	0	0	0	0	0	0	0	0	0	0	0	0	0	0	0	0	0	0	0	0	0	0	0	0	0
OTU_1073	0	1	4	1	0	1	0	0	0	0	0	0	1	0	0	0	0	0	0	0	0	1	0	1	0	1	0	0	1	0	0	0	0	0	0	1	0	0	0	0	0	2	0	0	1	0	0	0	0
OTU_2504	0	0	0	0	0	0	0	0	0	0	0	0	0	0	0	0	0	0	0	0	0	0	0	0	0	0	0	0	0	0	0	0	0	0	0	0	0	0	0	0	0	0	0	0	0	0	0	0	0
OTU_2123	0	0	0	0	0	0	0	0	0	0	0	0	0	0	0	0	0	0	0	0	0	0	0	0	0	0	0	0	0	0	0	0	1	0	0	0	0	0	0	0	0	0	0	0	0	0	0	0	0
OTU_1446	0	0	0	0	0	0	0	0	0	0	0	0	0	0	0	0	0	0	0	0	0	0	0	0	0	0	0	0	0	0	0	0	0	0	0	0	0	0	0	1	0	0	0	0	0	0	1	1	1
OTU_2417	0	0	0	0	0	0	0	0	0	0	0	0	0	0	0	0	0	0	0	0	0	0	0	0	0	0	0	0	0	0	0	0	0	0	0	0	0	0	0	0	0	0	0	0	0	0	0	0	0
OTU_2418	0	0	0	0	0	0	0	0	0	0	0	0	0	0	0	0	1	0	0	0	0	0	0	0	0	0	0	0	0	1	0	0	0	0	0	0	0	0	0	0	0	0	0	0	0	0	0	0	0
OTU_2447	0	0	0	0	1	0	0	0	0	3	0	1	0	0	0	0	0	0	0	0	0	0	0	0	0	0	0	0	0	0	0	0	0	0	1	0	0	0	0	0	0	0	1	1	0	0	0	0	0
OTU_479	0	1	2	0	0	0	0	0	0	1	0	0	0	0	0	1	0	1	0	0	0	0	0	0	0	0	0	0	0	0	0	1	0	0	0	0	0	1	0	1	0	1	1	0	0	0	0	0	2
OTU_1096	0	0	0	0	0	0	0	0	0	1	0	2	0	0	0	1	0	0	0	0	0	0	0	1	0	0	0	0	1	0	0	0	0	0	1	0	2	0	0	0	0	0	0	0	0	0	0	0	0
OTU_2451	0	0	0	0	0	0	0	0	0	0	0	0	0	0	0	0	0	0	0	0	0	0	0	0	0	0	0	0	0	0	0	0	1	0	0	0	0	0	0	0	0	0	1	0	0	0	0	0	0
OTU_1554	0	0	0	0	0	0	0	0	0	1	0	0	0	0	0	0	0	0	2	0	0	0	0	0	0	0	0	0	0	0	0	1	0	0	0	0	0	0	0	0	0	0	0	0	0	0	0	0	0
OTU_1374	0	0	0	0	0	0	0	0	0	0	0	0	0	0	0	0	0	0	0	0	0	0	0	0	0	0	0	0	0	0	0	0	0	0	0	0	0	0	0	0	0	0	0	1	0	0	0	0	0
OTU_1558	0	0	0	0	0	0	0	0	0	0	0	0	0	0	0	0	0	0	0	0	0	0	0	0	0	0	0	0	0	1	1	0	1	0	0	1	0	1	0	0	0	0	0	0	0	1	0	0	0
OTU_1098	0	0	0	0	0	0	1	0	0	0	0	0	0	0	0	0	0	0	0	0	0	0	0	0	0	0	0	0	0	0	0	0	0	0	0	0	0	3	0	0	0	0	0	0	0	0	0	0	0
OTU_1944	0	1	0	0	0	0	0	0	0	0	0	0	0	0	0	0	0	0	0	0	0	0	0	0	0	0	0	0	0	0	0	0	0	0	0	0	1	0	0	0	0	0	0	0	0	0	0	0	0
OTU_2202	0	1	0	0	0	0	0	0	0	0	0	1	0	0	0	0	0	0	0	0	0	0	0	0	0	0	0	0	0	0	0	0	0	0	0	1	0	0	0	0	0	0	0	0	0	0	0	0	1
OTU_1361	0	0	0	0	0	0	0	0	0	0	0	0	0	0	0	0	0	0	0	0	0	0	0	0	0	0	0	0	0	0	0	0	0	0	0	0	0	0	0	0	0	0	0	0	0	0	0	0	0
OTU_1440	0	0	0	0	0	0	0	0	0	0	0	0	0	0	0	0	0	0	0	0	0	0	0	0	0	0	0	0	0	0	0	1	0	0	0	0	0	3	0	0	0	0	0	0	0	0	0	0	0
OTU_939	0	0	0	1	0	0	0	0	1	0	0	0	0	0	0	0	0	0	0	0	0	0	0	0	0	1	1	0	0	0	0	0	0	0	0	0	1	0	0	0	0	0	0	0	0	0	0	0	0
OTU_1648	0	0	0	0	0	0	0	0	0	0	0	0	0	0	0	0	0	0	0	0	0	0	0	0	0	0	0	0	0	0	1	0	0	0	0	0	0	1	0	0	0	0	0	0	0	0	0	0	0
OTU_1303	0	0	0	0	0	0	0	0	0	0	0	0	0	0	0	1	0	0	1	0	0	0	0	0	0	0	0	0	0	0	0	0	0	0	0	0	0	0	0	1	0	0	0	0	0	0	0	0	2
OTU_2551	0	0	0	0	0	0	0	1	0	0	0	0	0	0	0	0	0	0	0	0	0	0	0	0	0	0	0	0	0	1	0	0	0	0	0	0	0	0	0	0	0	1	0	0	0	0	0	0	0
OTU_872	0	0	0	1	0	0	0	0	0	0	1	0	0	0	0	0	0	0	0	0	0	0	0	0	1	1	1	0	0	0	0	0	0	0	0	0	0	0	0	0	0	0	0	0	1	0	0	0	0
OTU_1947	0	0	1	0	0	0	0	0	0	1	0	0	0	0	0	0	0	1	0	0	0	0	0	0	0	0	0	0	0	0	1	0	0	0	0	0	0	0	0	0	0	0	0	0	0	0	0	0	0
OTU_1111	0	0	0	0	0	0	1	0	0	0	1	0	0	0	1	0	0	0	0	0	0	0	0	1	0	2	0	0	1	0	0	0	0	0	0	0	0	0	0	0	0	0	0	0	0	1	0	0	0
OTU_1123	0	0	0	0	0	0	0	0	0	0	0	0	0	0	0	0	0	0	0	0	0	0	0	0	1	1	0	2	0	0	0	0	0	0	0	0	0	0	0	0	0	0	0	0	0	0	0	0	0
OTU_1099	0	0	0	0	2	2	0	0	1	0	0	2	0	2	1	0	0	0	2	1	0	0	1	1	0	0	0	0	0	1	0	0	1	0	0	0	0	0	0	2	0	0	1	0	0	0	0	0	0
OTU_1789	0	0	0	0	0	0	1	0	0	0	0	0	0	0	0	0	0	1	0	0	0	0	0	0	0	0	0	0	0	1	0	0	0	1	0	0	0	0	0	0	0	0	0	0	0	0	0	0	0
OTU_2437	0	0	0	0	0	0	0	0	0	0	0	1	0	0	0	0	1	0	0	0	0	0	0	0	0	0	0	0	0	0	0	0	0	1	0	0	0	0	0	2	0	0	0	0	1	0	0	0	0
OTU_2279	0	0	0	0	0	0	1	0	0	0	0	0	0	0	0	0	0	0	0	0	0	0	0	0	0	0	0	3	0	0	0	0	0	0	0	0	0	0	0	0	0	0	0	0	0	0	0	0	0
OTU_1776	0	0	0	0	0	0	0	0	0	0	0	1	0	0	0	1	1	0	0	1	0	0	0	0	0	1	0	0	1	0	0	0	0	0	0	0	0	0	0	0	0	0	0	0	0	0	0	0	0
OTU_2363	1	0	0	0	0	0	0	0	0	0	0	0	0	0	0	0	0	0	0	0	0	0	0	0	0	0	0	0	0	0	0	0	0	0	0	0	0	0	0	0	0	0	0	0	0	0	0	0	0
OTU_1533	0	0	0	0	0	0	0	0	0	0	1	0	0	0	0	0	2	0	0	0	0	2	0	0	0	0	0	0	0	0	0	0	0	0	0	0	0	0	0	0	0	0	0	0	0	0	0	0	0
OTU_622	0	1	0	0	0	0	0	0	0	1	0	1	0	0	0	0	0	0	1	0	0	0	0	0	0	0	2	0	0	0	0	2	0	0	0	0	1	0	1	0	0	0	0	0	1	2	1	0	0
OTU_1591	1	1	0	0	0	0	0	0	0	0	0	0	3	0	0	0	0	0	1	0	0	0	0	0	0	0	0	0	0	0	0	0	0	0	0	0	0	0	0	0	0	0	0	0	0	0	0	0	0
OTU_1575	1	0	0	0	0	0	0	0	0	0	0	0	0	0	0	0	0	0	0	0	0	0	0	0	0	0	0	0	0	0	0	0	0	1	0	0	0	0	0	0	0	0	0	0	0	0	0	0	0
OTU_2130	0	0	0	0	0	0	0	0	0	0	0	0	0	0	0	0	0	0	0	0	0	0	0	0	0	0	0	0	0	0	0	0	0	0	0	0	0	0	0	0	0	0	0	0	0	1	0	0	0
OTU_921	0	0	0	0	0	0	1	0	1	0	0	0	0	0	0	0	0	1	0	0	0	0	0	0	0	0	0	0	0	0	0	0	0	0	0	3	0	0	0	0	0	0	0	0	0	0	0	0	0
OTU_1529	0	0	0	0	0	0	0	0	0	0	0	0	0	0	0	0	0	0	0	0	1	0	0	0	0	0	0	0	0	0	0	0	0	0	0	0	0	0	0	0	1	0	3	0	0	0	0	0	0
OTU_1191	1	0	0	1	0	0	0	0	0	0	0	0	0	0	0	0	0	0	0	0	0	0	0	0	0	0	0	0	0	0	0	0	0	0	0	0	0	0	0	0	0	0	0	0	0	0	0	0	0
OTU_1562	0	0	0	0	0	0	0	0	0	0	0	0	0	0	0	0	0	0	0	0	0	0	0	1	0	0	0	1	0	1	0	0	0	0	0	0	0	1	0	0	0	0	0	0	0	0	0	0	0
OTU_1218	0	0	0	0	0	0	1	0	0	0	1	0	0	0	0	0	0	1	0	0	1	0	1	0	0	0	1	0	0	0	0	1	0	0	0	0	0	0	1	0	0	0	0	0	0	0	1	0	1
OTU_2008	0	0	0	0	0	0	0	0	0	0	0	0	0	0	0	0	0	0	0	0	0	1	0	1	0	0	0	0	0	1	0	1	1	0	0	0	0	0	0	0	0	0	0	0	0	0	0	0	0
OTU_967	0	0	0	0	0	0	0	0	0	0	0	0	0	0	0	0	0	1	0	0	0	0	0	0	1	0	0	0	0	0	0	0	0	0	0	0	1	0	0	0	0	0	0	0	0	0	0	0	1
OTU_1608	0	0	0	0	0	0	0	0	0	0	0	0	0	0	0	0	0	0	0	0	0	0	0	0	0	0	0	0	0	0	0	0	0	0	2	0	0	0	0	0	0	0	0	0	0	0	0	0	0
OTU_1067	0	0	0	0	0	0	0	0	0	0	0	0	0	0	0	0	0	0	0	0	0	0	0	0	0	0	0	0	0	0	0	0	0	0	0	0	0	0	0	0	0	0	0	0	0	1	0	0	0
OTU_1357	0	0	2	0	0	0	0	0	0	0	0	0	0	0	1	0	0	0	0	0	0	0	0	0	0	0	0	0	0	0	0	0	0	0	0	0	0	0	0	0	0	0	0	0	0	0	0	0	0
OTU_1980	0	0	0	0	0	0	0	0	0	0	0	0	0	0	0	0	0	0	0	0	0	0	0	0	0	0	0	0	0	0	0	0	0	0	0	0	0	0	0	0	0	0	0	0	0	0	1	1	0
OTU_1307	0	0	1	0	0	0	1	0	0	1	0	0	0	0	0	0	0	0	0	0	0	0	1	0	0	0	0	0	0	1	1	1	1	0	0	1	0	0	0	0	0	0	0	0	0	0	1	0	0
OTU_223	0	0	0	0	0	0	0	0	0	0	0	0	0	0	0	0	0	0	0	0	0	0	0	0	0	0	0	0	0	0	0	0	0	0	0	0	0	0	0	0	0	0	0	0	39	0	0	0	0
OTU_1118	0	0	0	0	1	0	0	0	0	0	0	0	0	1	0	0	0	0	0	0	0	0	0	0	0	0	0	0	0	0	0	0	0	0	0	0	1	1	0	0	0	0	0	0	0	0	0	0	0
OTU_2000	0	0	0	0	0	0	0	0	0	0	0	0	0	0	0	0	0	0	0	0	0	0	2	0	0	0	0	0	0	0	0	0	0	0	0	0	0	0	0	0	0	0	0	0	0	0	0	0	0
OTU_2275	0	0	0	0	0	0	3	0	0	0	0	0	0	0	0	0	0	0	0	0	0	0	0	0	0	0	0	0	0	0	0	0	0	0	0	0	0	0	0	0	0	0	0	0	0	0	0	0	0
OTU_556	0	0	0	0	0	0	0	0	0	0	0	0	0	0	0	0	0	6	0	0	0	0	0	1	0	0	0	0	0	1	0	0	0	0	0	0	0	0	0	1	0	0	1	0	1	0	0	0	1
OTU_1438	0	0	0	0	0	0	0	1	0	0	0	0	0	0	1	0	0	0	0	1	0	1	0	0	0	0	0	0	0	0	0	1	0	0	0	0	0	0	0	0	0	0	0	0	0	0	0	0	0
OTU_1468	0	0	0	0	0	0	0	0	4	0	0	0	0	0	0	0	0	0	0	0	0	0	0	0	0	0	0	0	0	0	0	0	0	0	0	0	0	0	0	0	0	0	0	0	0	0	0	0	0
OTU_1380	0	0	0	0	0	0	0	0	0	0	0	0	0	0	0	0	0	0	0	0	0	0	0	0	0	0	0	0	0	0	0	0	0	0	0	0	0	0	0	0	0	0	0	0	0	0	0	0	0
OTU_953	0	0	0	0	0	0	0	0	0	0	0	0	0	0	0	0	0	0	0	0	0	0	0	0	1	1	0	0	0	0	0	2	0	0	0	0	0	0	0	0	0	0	0	0	0	0	0	0	0
OTU_1471	0	0	0	0	0	0	0	0	0	0	1	0	0	0	0	0	0	0	0	0	0	0	0	0	0	0	0	0	0	0	0	0	0	0	0	0	0	0	0	0	0	1	0	0	0	0	0	0	0
OTU_1687	0	0	0	0	0	0	0	0	0	0	0	0	0	0	0	0	0	0	0	0	0	0	0	0	0	0	0	0	0	0	0	0	0	0	0	0	0	0	0	0	0	0	0	0	0	0	0	0	0
OTU_1801	0	0	0	0	0	0	0	0	0	0	0	0	0	0	0	0	0	0	0	0	0	0	0	0	0	0	1	0	0	0	0	0	0	0	0	0	0	0	0	0	0	0	0	0	0	0	0	0	0
OTU_1092	0	0	0	0	0	0	0	0	0	0	0	0	2	0	0	0	0	0	0	0	0	0	0	0	0	0	0	0	0	0	0	0	0	0	0	0	0	0	0	0	2	0	0	0	0	0	0	0	0
OTU_923	0	1	0	0	0	1	1	0	0	0	0	1	0	0	0	0	0	0	0	0	0	0	0	0	0	1	0	0	0	0	0	0	0	0	0	0	0	0	1	0	0	0	0	0	0	0	0	0	1
OTU_1101	0	0	0	0	0	0	0	0	0	0	0	0	0	0	0	0	0	0	0	1	0	0	0	0	0	0	1	0	0	0	0	0	0	1	0	0	0	0	0	0	0	0	0	0	0	0	0	0	0
OTU_692	0	0	0	0	0	0	0	0	0	0	0	0	0	0	0	0	0	0	0	0	3	0	0	0	0	0	1	0	0	0	0	0	1	1	0	1	0	0	0	0	0	0	1	0	0	1	0	0	0
OTU_1463	0	0	0	0	0	0	0	0	0	1	0	0	0	0	0	0	0	0	0	0	0	0	0	0	0	0	0	0	0	1	0	0	0	0	0	0	1	0	0	0	0	0	0	0	0	0	0	0	0
OTU_742	0	1	0	1	2	0	0	0	0	0	0	0	0	0	1	0	0	0	0	0	0	0	0	0	1	1	0	0	0	0	0	0	0	0	0	0	0	0	0	0	0	0	0	0	0	1	0	0	0
OTU_1121	0	0	0	0	0	0	0	1	0	0	0	0	0	0	0	0	0	0	1	0	0	0	0	0	0	0	0	0	0	0	0	0	1	0	0	0	0	0	0	0	0	0	0	0	0	0	0	0	0
OTU_909	0	0	1	0	0	0	1	0	0	0	1	0	0	0	0	0	0	0	0	0	0	0	0	0	0	0	0	0	0	0	0	0	0	0	0	0	0	0	0	0	0	0	0	0	0	1	0	0	0
OTU_1924	0	0	0	0	0	1	0	0	0	0	0	0	0	1	1	0	0	0	0	1	0	0	0	0	0	1	1	0	0	0	1	0	0	0	0	0	0	0	0	0	0	1	0	0	0	0	0	0	0
OTU_803	0	0	0	0	0	0	0	0	0	0	0	0	0	0	0	0	0	0	0	0	0	0	0	0	0	0	1	1	0	0	0	0	0	0	0	0	0	0	0	0	0	0	0	0	0	0	0	0	0
OTU_1978	0	1	1	1	0	0	0	0	0	0	0	0	0	0	0	0	0	0	0	1	0	0	0	0	0	0	0	0	0	0	1	0	0	0	1	0	0	0	0	0	0	1	0	0	0	0	0	0	0
OTU_1659	0	1	0	0	0	0	1	0	0	0	0	0	0	0	0	0	0	0	0	0	0	0	0	0	0	0	0	0	0	0	0	0	0	0	0	0	1	0	0	0	0	0	0	0	0	0	3	0	0
OTU_1773	0	0	0	0	0	0	0	0	0	0	0	0	0	0	0	0	0	0	0	0	0	1	0	0	0	0	0	0	0	0	0	0	1	0	0	0	0	0	0	0	0	0	0	0	0	0	0	0	0
OTU_1553	0	0	0	4	0	0	0	0	0	0	0	0	0	0	0	0	0	0	0	0	0	0	0	0	0	0	0	0	0	0	0	0	0	1	0	0	0	0	0	0	0	0	0	0	0	0	0	0	0
OTU_1318	0	0	0	0	0	0	0	0	0	0	0	0	0	0	0	0	0	0	0	0	0	0	0	0	0	2	0	0	0	0	0	0	0	0	0	0	0	0	0	0	0	0	0	0	2	0	0	0	0
OTU_1240	0	0	0	0	0	1	0	0	0	0	0	0	1	0	0	0	0	0	0	0	0	0	0	0	0	0	0	0	0	1	0	0	0	0	0	0	0	0	1	0	0	1	0	0	0	0	0	0	0
OTU_1720	0	0	0	0	0	0	0	0	0	0	0	0	0	0	0	0	0	0	0	0	0	0	0	0	0	0	0	0	0	0	0	0	0	0	0	0	0	0	0	3	0	0	0	0	0	0	0	0	0
OTU_2485	0	1	0	0	0	0	0	0	0	1	0	0	0	0	0	0	0	0	0	0	0	0	0	0	0	0	0	0	0	1	0	0	0	0	0	0	0	0	0	0	0	0	0	0	0	0	0	0	0
OTU_2396	0	0	0	0	0	1	0	0	0	0	0	0	0	0	0	0	1	0	0	0	0	0	2	0	0	0	0	0	0	0	1	0	0	0	0	0	0	0	0	0	0	0	0	0	0	0	0	0	0
OTU_1507	0	0	0	0	0	0	0	0	0	0	0	0	0	0	1	0	0	0	0	0	0	0	0	0	0	0	0	0	0	0	0	1	0	0	0	0	0	0	0	0	0	0	0	0	1	1	0	0	0
OTU_1671	0	0	0	0	0	0	0	0	0	1	0	0	0	0	0	0	0	0	0	0	0	1	0	0	0	0	0	0	0	0	0	0	0	0	0	0	0	0	0	0	0	0	0	0	0	0	0	0	1
OTU_2400	0	0	0	0	0	0	0	0	0	0	0	0	0	0	0	0	1	0	0	0	0	0	0	0	0	1	0	0	0	1	0	0	0	0	0	0	0	0	0	0	0	0	0	0	0	0	0	0	0
OTU_966	0	0	0	0	0	0	0	0	0	0	0	0	0	0	1	0	0	0	0	0	0	0	1	0	0	0	0	0	0	0	0	0	0	0	0	0	0	0	0	0	0	0	0	0	0	0	0	0	0
OTU_2215	0	0	0	0	0	0	0	0	0	0	0	0	0	0	0	0	0	0	0	0	0	0	0	0	0	0	0	0	0	0	0	0	0	0	0	0	0	0	0	0	0	0	0	1	0	0	0	0	0
OTU_1105	0	0	0	0	0	0	1	0	0	0	0	0	0	1	0	0	0	0	0	0	0	0	0	0	0	0	0	2	0	0	0	0	0	0	0	0	0	0	0	0	0	0	0	0	0	0	0	0	0
OTU_1288	0	0	0	0	0	0	0	0	0	0	0	0	0	0	0	0	0	0	0	1	0	0	0	0	0	0	0	0	0	0	0	0	0	0	1	0	0	0	0	0	0	0	0	0	0	0	0	0	0
OTU_2339	0	0	0	0	0	0	0	0	0	2	0	0	3	0	0	0	0	0	0	0	0	0	0	0	0	0	0	0	0	0	0	0	0	0	0	0	0	0	0	0	0	0	0	0	0	0	0	0	0
OTU_1543	0	0	1	0	0	0	0	1	0	0	0	0	0	0	0	0	0	0	0	0	0	0	0	0	0	0	0	0	0	0	0	0	0	0	2	0	0	0	1	0	0	0	0	0	0	0	0	0	0
OTU_1167	0	1	0	0	0	0	0	1	0	0	0	0	0	0	2	0	1	0	0	0	0	0	0	0	0	1	0	0	0	0	0	0	0	1	1	0	0	0	0	0	0	0	0	0	0	0	0	0	0
OTU_2327	0	0	0	0	0	0	0	0	0	0	0	0	0	0	0	0	0	0	0	0	0	0	0	0	0	0	0	0	0	0	0	0	0	0	0	0	0	0	0	1	0	0	0	0	0	0	0	0	0
OTU_1197	0	0	0	0	0	0	0	0	0	0	0	0	0	0	0	0	0	0	0	0	5	0	0	0	0	0	0	0	0	0	0	0	0	0	0	0	0	0	0	0	0	0	0	0	0	0	0	0	0
OTU_1222	6	0	0	0	0	0	0	0	0	0	0	0	0	0	0	0	0	0	0	0	0	0	0	0	0	0	0	0	0	0	0	0	0	0	0	0	0	0	0	0	0	1	0	0	0	0	0	0	0
OTU_1698	0	0	0	0	0	0	0	0	0	2	0	0	0	0	0	0	0	0	0	0	1	0	0	0	0	0	0	0	0	0	0	0	0	0	0	0	0	0	0	0	0	0	0	1	0	0	0	0	0
OTU_428	0	0	0	0	0	1	0	0	0	1	0	0	0	1	0	0	0	0	0	0	0	0	0	3	1	0	1	0	0	0	0	1	0	0	0	0	0	0	0	0	0	0	0	4	0	0	0	0	0
OTU_1946	0	0	0	0	0	0	0	0	1	0	0	0	0	1	2	0	0	0	0	0	0	0	0	0	0	0	0	0	0	0	0	0	0	0	0	0	0	0	0	0	0	0	0	0	0	0	0	0	0
OTU_514	0	0	0	0	0	0	0	0	0	0	0	0	0	0	0	0	0	0	0	0	0	0	0	0	0	0	0	0	0	0	0	0	0	0	0	0	0	0	0	0	1	0	0	0	8	0	0	0	0
OTU_399	0	0	0	0	0	0	0	0	0	0	0	0	0	0	0	0	0	0	0	0	0	0	0	0	0	0	0	0	0	0	0	0	0	0	0	0	0	0	0	0	0	0	0	0	0	0	0	0	0
OTU_1313	0	0	1	2	0	0	1	0	0	0	0	0	0	0	0	0	0	0	0	0	0	1	0	0	0	0	0	2	0	0	0	1	0	0	0	0	1	2	0	0	0	0	0	0	1	0	0	0	0
OTU_929	0	0	0	0	0	0	1	0	0	0	0	0	0	0	0	0	0	0	0	0	0	0	2	0	0	0	0	0	0	1	0	0	0	0	0	0	0	0	1	0	0	0	0	0	0	0	0	0	0
OTU_1975	0	0	0	0	0	0	0	0	0	0	0	0	0	0	0	0	0	0	0	0	0	0	0	0	0	0	0	0	0	0	0	0	0	0	0	0	0	0	0	0	0	0	0	0	0	0	0	0	1
OTU_1077	0	0	1	0	0	0	0	0	0	0	0	0	1	0	1	1	1	0	0	0	0	0	0	0	0	0	0	0	0	0	0	0	0	1	0	1	0	0	0	0	1	1	0	0	0	0	0	1	0
OTU_1805	0	0	1	0	0	0	0	1	0	0	0	0	0	0	0	0	0	0	0	0	0	0	0	0	0	0	0	0	0	0	0	0	0	0	0	0	0	0	0	0	0	0	1	0	0	0	0	0	1
OTU_2468	0	0	0	0	0	0	0	0	0	0	0	1	0	0	0	0	0	0	0	0	0	0	1	0	0	0	0	0	0	0	0	0	0	0	0	0	0	0	0	0	0	0	0	0	0	0	0	0	0
OTU_1062	0	0	1	0	0	0	0	0	2	0	0	0	2	0	0	1	0	0	0	0	0	1	0	0	0	0	1	0	0	0	0	0	0	0	0	0	0	0	0	0	0	0	0	0	0	0	0	0	2
OTU_1454	0	1	1	0	0	0	0	0	0	0	0	0	0	0	0	0	0	0	0	0	0	0	0	0	0	0	0	0	0	0	0	0	0	0	0	0	0	0	0	0	0	0	0	0	0	0	0	0	0
OTU_2489	0	0	0	0	0	0	0	0	0	0	0	0	0	0	0	0	0	0	0	0	0	0	0	0	0	0	0	0	0	0	0	0	0	0	0	0	0	0	0	1	0	0	0	0	0	2	0	0	0
OTU_1052	0	0	0	0	0	0	0	0	0	0	0	0	0	0	0	0	0	0	0	0	0	0	0	1	0	0	0	0	0	0	0	0	0	0	0	0	1	0	0	0	0	0	0	0	0	0	0	0	0
OTU_1833	1	0	0	0	0	1	0	0	0	0	0	0	0	0	0	0	0	0	0	0	0	0	0	0	0	0	0	0	0	0	0	0	0	0	0	0	0	0	0	0	0	0	0	0	0	0	0	0	0
OTU_2490	0	0	0	0	0	0	0	0	0	0	0	0	0	0	0	0	0	0	0	0	0	0	0	1	0	0	0	0	0	1	0	0	0	0	0	0	0	0	0	0	0	0	0	0	0	0	0	0	0
OTU_2181	0	0	0	0	0	1	0	0	0	0	0	0	0	0	0	0	0	0	0	2	0	0	0	0	0	0	0	0	0	0	0	0	0	0	0	0	0	0	0	1	0	0	0	0	0	0	0	0	0
OTU_1215	0	0	0	0	0	0	0	1	0	0	0	0	0	0	0	0	0	0	0	0	1	0	0	0	0	0	0	0	0	0	1	0	0	0	0	1	0	0	0	0	0	0	0	0	0	0	0	0	0
OTU_977	0	0	0	0	0	0	0	0	0	0	0	0	0	0	0	0	0	0	0	0	0	0	0	0	0	0	0	0	0	0	1	0	0	0	0	0	0	0	0	0	3	0	2	0	0	0	0	0	0
OTU_1164	0	0	0	0	0	0	0	0	0	0	0	0	0	0	0	0	1	0	0	0	0	0	0	1	0	0	0	0	0	0	0	0	0	0	0	0	0	0	0	0	0	0	0	1	0	0	0	0	0
OTU_1187	0	0	0	0	0	0	0	0	0	0	0	0	1	0	0	0	0	0	0	0	0	0	0	0	0	0	0	0	0	0	0	0	0	0	0	0	0	0	0	0	0	0	0	0	0	1	0	1	0
OTU_1166	0	0	0	0	0	0	0	0	0	0	0	0	0	0	1	0	0	0	0	2	0	0	0	0	0	0	0	0	0	0	0	0	0	0	0	1	0	0	0	0	0	0	0	1	0	0	0	0	0
OTU_1192	1	0	0	0	0	0	0	0	0	0	0	0	0	0	0	0	0	0	0	0	0	0	0	0	0	0	0	1	0	0	0	0	0	0	0	0	0	0	0	0	0	1	0	0	0	0	0	0	0
OTU_1054	0	0	0	0	0	0	0	0	0	0	0	0	0	0	0	0	0	0	0	0	0	1	0	1	0	1	0	0	0	0	0	0	0	1	0	0	0	1	0	0	0	0	0	0	0	0	0	0	0
OTU_2171	0	0	0	0	0	1	0	0	0	0	0	0	0	0	0	0	0	0	0	0	0	0	0	0	0	0	0	0	0	0	0	0	0	0	0	0	0	0	0	0	0	0	0	0	0	0	0	0	0
OTU_1760	0	0	0	0	0	0	0	0	0	0	0	0	0	0	0	0	0	0	0	0	0	0	0	0	0	0	0	0	0	0	0	0	0	0	0	0	0	0	0	0	0	1	0	0	0	0	0	0	0
OTU_2061	0	0	0	0	0	0	0	1	0	0	0	0	0	0	0	0	0	0	0	0	0	0	0	0	0	0	0	0	0	0	0	0	1	0	0	0	0	0	0	1	0	0	0	0	0	0	0	0	0
OTU_1971	0	0	2	0	0	0	0	0	0	0	0	0	0	0	0	0	0	0	0	0	0	0	0	0	0	0	0	0	0	0	0	0	0	0	0	0	0	0	0	0	0	0	0	0	0	0	0	0	0
OTU_2388	0	0	1	0	0	0	0	0	0	0	0	0	0	0	0	0	0	0	0	0	0	0	0	0	0	0	0	0	0	0	0	0	0	0	0	0	0	0	1	0	0	0	0	0	0	0	0	0	0
OTU_2005	0	0	0	0	0	0	0	0	0	0	0	0	0	0	0	0	0	0	0	0	0	0	0	0	0	1	0	0	0	0	0	0	0	0	0	0	0	0	0	0	0	0	0	0	0	0	0	0	0
OTU_997	0	1	1	0	0	0	0	0	0	0	0	0	1	0	0	0	0	0	1	1	0	1	0	0	0	0	1	0	2	0	0	0	0	0	0	0	0	0	0	0	0	0	0	0	0	0	0	1	0
OTU_1766	0	0	0	1	0	0	1	0	0	0	0	0	1	0	0	0	0	0	0	0	0	0	0	0	0	0	0	1	1	0	0	0	2	1	0	0	0	0	0	0	0	1	0	1	0	1	1	0	1
OTU_2134	0	0	0	0	0	0	0	0	1	0	0	0	0	0	0	0	0	0	0	0	0	0	0	0	0	0	0	0	0	0	1	0	0	0	0	0	0	0	0	0	1	0	0	0	0	0	0	0	0
OTU_2548	0	0	0	0	0	0	0	0	0	0	0	0	1	0	0	0	0	0	0	0	0	0	0	0	0	0	2	0	0	0	0	0	0	0	0	0	0	1	0	0	0	0	0	0	0	0	0	0	0
OTU_2111	0	0	0	0	1	0	0	0	0	1	0	0	0	0	0	0	0	0	0	0	0	0	1	0	0	0	0	0	0	0	0	0	1	0	0	1	0	0	0	0	0	0	1	0	0	2	0	0	0
OTU_2163	0	0	0	1	0	0	0	0	0	0	0	0	0	0	0	0	0	0	1	0	0	0	0	0	0	0	0	0	0	0	0	1	0	0	0	0	0	0	0	0	1	0	0	0	0	0	0	0	0
OTU_730	1	1	0	0	0	0	0	0	0	0	0	0	0	0	0	0	0	1	3	0	0	0	0	0	0	0	0	0	0	0	0	0	0	0	0	0	0	0	0	0	0	0	0	0	0	0	0	0	0
OTU_2325	0	0	0	0	1	0	0	0	0	0	0	0	0	0	0	0	0	0	0	0	0	0	0	0	0	1	0	0	0	0	0	0	0	0	1	0	0	0	0	0	0	0	0	0	0	0	0	0	0
OTU_2564	0	0	0	0	1	0	0	0	0	0	0	0	0	0	0	0	0	0	0	0	0	0	0	0	0	0	0	0	0	0	0	0	0	0	0	0	0	0	0	0	0	0	1	0	0	0	0	0	0
OTU_1308	0	0	0	0	0	1	0	0	0	0	0	0	0	0	0	1	0	0	0	0	0	1	0	0	0	0	0	0	0	0	1	0	0	0	0	0	0	0	0	0	0	0	0	0	0	0	0	1	0
OTU_1127	0	0	0	0	0	1	0	0	0	0	0	0	0	0	0	0	0	0	0	0	0	0	0	0	0	1	0	1	0	0	0	0	0	0	0	0	0	0	0	0	0	0	0	1	1	0	0	0	0
OTU_1639	0	0	0	0	0	0	0	0	0	0	0	0	0	0	0	0	0	0	0	0	0	0	0	0	0	0	0	0	0	0	0	0	0	0	0	0	0	0	0	0	0	0	0	0	0	0	0	0	0
OTU_1884	0	0	0	2	0	0	0	1	0	0	0	0	1	0	0	0	0	0	0	0	0	0	0	0	0	0	0	0	0	0	0	0	0	0	0	0	0	0	0	0	0	0	0	0	0	0	0	0	0
OTU_1777	0	0	0	0	0	0	0	0	0	1	0	0	0	0	0	0	0	0	0	0	0	0	0	0	0	0	0	0	0	1	0	0	0	0	0	0	0	0	0	0	0	0	0	0	0	0	1	0	0
OTU_2170	0	0	1	0	0	0	1	0	0	0	0	1	0	0	0	0	0	0	0	0	0	0	0	0	0	0	1	0	1	0	0	0	0	1	0	0	0	0	0	0	0	0	0	0	0	0	0	0	0
OTU_1655	0	0	2	0	0	0	0	0	0	0	0	0	1	0	0	0	0	0	0	2	0	0	0	0	0	0	0	0	0	0	0	0	0	0	0	0	0	0	0	0	0	0	0	0	0	0	0	1	0
OTU_1328	0	0	0	0	0	1	0	0	0	0	0	1	0	0	1	0	0	0	0	0	0	0	0	0	0	0	0	0	0	0	0	0	0	1	0	0	0	0	0	0	1	1	0	0	0	0	0	0	0
OTU_1707	0	1	0	0	1	0	0	0	0	0	0	0	0	0	0	0	0	0	0	1	0	0	0	0	0	0	0	2	1	0	0	0	0	0	0	0	0	0	0	0	1	0	0	0	0	0	0	0	0
OTU_1421	0	0	0	0	0	0	0	0	0	0	0	0	0	0	0	0	0	0	0	0	0	0	0	0	0	0	0	0	0	0	0	0	0	0	0	0	0	0	0	0	0	0	0	0	0	0	0	2	0
OTU_2470	0	0	0	0	0	0	0	0	0	0	0	0	0	0	0	0	0	0	0	0	0	0	0	0	0	0	0	0	1	0	0	0	0	0	0	0	0	0	0	0	0	0	0	0	0	0	0	0	0
OTU_2344	0	0	0	0	0	0	0	1	0	0	0	0	0	1	0	0	0	0	1	0	0	1	0	0	0	0	0	0	0	0	0	0	1	0	0	0	0	0	0	0	0	0	0	0	0	0	0	0	1
OTU_2402	0	0	0	0	0	0	0	0	0	0	9	0	0	0	0	0	0	0	0	0	0	0	0	0	1	0	0	0	0	0	0	0	0	0	0	0	0	0	0	0	0	0	1	0	1	0	0	0	0
OTU_2472	0	0	0	0	0	0	0	0	0	0	0	2	0	0	0	1	0	0	0	0	0	0	0	0	0	1	0	0	0	0	0	0	0	0	0	0	0	0	0	0	0	0	0	0	0	0	0	1	0
OTU_1725	0	0	0	0	0	1	0	0	0	1	0	0	0	0	0	0	0	0	0	0	0	0	1	0	0	0	0	0	0	0	0	0	0	0	0	0	0	1	0	0	0	1	0	1	0	1	1	0	1
OTU_984	0	0	0	0	0	0	0	0	0	0	1	0	0	0	0	0	0	0	0	0	0	0	0	1	0	0	0	0	0	0	0	0	0	0	0	0	0	0	0	0	0	0	0	0	0	2	0	3	0
OTU_1473	0	0	0	0	0	0	0	0	0	1	0	0	1	1	0	0	0	0	0	0	0	0	0	0	0	0	0	1	0	0	1	0	0	0	0	0	0	0	0	0	0	0	0	0	0	0	0	1	0
OTU_1115	0	0	0	1	1	0	0	0	0	0	0	0	0	0	0	0	0	0	0	0	0	0	0	0	0	0	0	0	0	0	0	0	0	0	0	0	0	0	0	0	0	0	1	0	0	0	0	0	0
OTU_1688	0	0	0	0	0	0	0	0	0	0	0	0	0	1	0	0	0	0	0	1	0	0	1	0	0	0	0	0	0	0	0	0	0	0	0	0	0	0	0	0	0	0	0	0	0	0	0	0	0
OTU_2554	0	0	1	0	0	0	0	0	0	0	0	0	0	0	0	0	0	0	0	0	1	0	0	0	0	0	0	0	0	0	0	0	0	0	0	0	0	0	0	1	0	0	0	0	0	0	0	0	0
OTU_1340	0	1	0	0	0	0	0	1	0	0	0	0	0	0	0	0	0	0	0	0	0	0	0	0	3	0	0	0	0	0	0	0	0	0	0	0	0	2	0	0	0	1	0	0	1	1	0	0	0
OTU_1314	0	0	0	0	0	0	0	1	0	0	0	0	0	0	0	0	0	0	0	0	0	0	0	0	0	0	0	0	0	0	0	0	0	0	0	0	0	0	0	0	0	0	0	0	0	0	0	0	0
OTU_1532	0	0	0	0	0	0	0	1	0	0	0	0	0	0	1	0	0	0	0	0	1	0	0	0	0	0	0	0	0	0	0	0	0	0	0	0	0	0	0	1	0	0	0	0	0	0	0	0	1
OTU_1347	0	0	0	0	0	0	0	1	0	0	0	0	0	0	0	1	0	0	0	0	0	0	0	0	0	0	0	0	0	0	0	0	0	0	2	0	0	0	0	0	0	0	0	0	0	0	0	0	1
OTU_2487	0	0	0	0	0	0	0	0	0	0	0	0	0	0	0	0	0	0	0	0	0	0	0	0	0	2	0	0	0	0	0	0	0	0	0	1	0	0	0	0	0	0	0	0	0	0	0	0	0
OTU_1004	1	0	0	0	0	0	1	0	0	0	0	0	0	0	0	0	0	0	0	0	0	0	0	0	1	1	1	0	0	1	0	0	0	0	0	0	0	0	1	0	3	0	0	1	0	0	0	0	0
OTU_935	0	0	1	0	0	0	0	1	0	0	0	0	0	0	0	0	0	0	0	0	0	0	0	0	0	0	0	1	1	1	0	0	0	0	0	0	1	0	0	0	0	0	0	0	0	0	0	0	0
OTU_2486	0	0	0	0	0	0	0	0	0	0	0	0	0	0	0	0	0	0	0	0	0	0	2	0	0	0	0	0	0	0	0	0	0	0	0	0	0	0	0	0	0	0	0	0	0	0	0	0	0
OTU_2002	0	0	0	0	0	0	0	0	0	0	0	0	0	0	0	0	0	0	0	0	0	0	0	3	0	0	0	0	0	0	0	0	0	0	0	0	0	0	0	0	0	0	0	0	0	0	0	0	0
OTU_712	0	0	1	0	0	0	0	0	0	0	0	0	0	1	0	0	0	0	0	1	0	0	0	0	0	0	1	1	0	0	0	0	0	0	0	1	0	0	0	0	0	0	0	0	0	0	0	0	0
OTU_1149	0	0	0	0	0	0	0	0	0	0	0	0	0	0	0	0	2	0	0	0	0	0	0	0	0	0	0	0	0	0	0	0	0	0	0	0	0	0	0	0	0	0	1	0	0	0	0	0	1
OTU_1824	0	0	1	0	0	0	0	0	0	0	0	0	0	0	0	0	1	0	1	0	0	0	0	0	0	0	0	0	0	0	0	0	0	0	0	0	0	0	0	0	0	0	0	0	0	0	0	0	0
OTU_2503	0	0	0	0	0	0	0	0	0	0	0	0	0	0	0	0	0	0	0	0	0	0	0	0	0	0	0	0	0	0	0	0	0	0	0	0	0	0	0	0	0	0	0	0	0	0	0	0	0
OTU_1831	0	0	0	0	0	0	0	0	0	0	0	0	0	0	1	0	2	0	0	0	0	0	0	0	0	0	0	0	0	0	0	0	0	0	0	0	0	0	0	0	0	0	0	0	0	0	0	0	0
OTU_1810	0	0	0	0	0	0	0	0	0	0	0	0	0	0	0	0	0	0	0	0	0	0	0	0	0	0	0	0	0	2	0	0	0	0	0	0	0	0	0	0	0	0	0	0	0	0	0	0	0
OTU_1939	0	0	0	0	0	0	0	1	0	0	0	0	1	0	0	0	0	0	0	0	0	0	0	1	0	0	0	0	0	1	0	0	1	0	0	0	0	0	0	0	0	0	0	0	0	0	0	0	1
OTU_1291	0	0	0	0	0	0	0	0	0	0	0	0	0	0	0	1	0	0	0	0	0	0	0	0	0	0	0	0	0	0	0	0	0	0	0	0	0	1	1	1	0	0	0	0	0	0	0	0	0
OTU_2022	0	0	0	0	0	0	0	1	0	0	0	0	0	0	0	0	0	0	0	0	0	0	0	0	0	0	0	0	0	0	0	0	0	0	0	0	0	0	0	0	0	0	0	0	0	0	0	0	0
OTU_708	1	0	0	0	0	0	0	0	0	0	0	1	0	0	0	0	0	0	0	0	0	0	0	0	3	0	0	0	1	0	0	0	0	0	1	9	0	0	0	0	0	0	0	0	0	0	0	0	0
OTU_2410	0	0	0	0	0	0	0	0	0	0	0	0	0	0	0	0	1	0	0	0	1	0	0	0	0	0	0	0	0	0	0	0	0	0	0	0	0	0	0	0	0	0	0	1	0	0	0	0	0
OTU_1456	0	0	0	0	0	0	0	0	0	0	0	0	0	0	0	0	0	0	0	0	0	0	0	0	0	0	0	0	0	0	0	0	0	0	0	0	0	0	1	0	0	0	1	0	0	0	0	0	0
OTU_874	1	1	0	0	1	0	0	0	2	0	0	0	1	1	0	2	1	0	0	0	1	3	0	0	0	1	0	0	1	0	1	0	1	0	0	0	0	0	1	0	0	0	0	0	1	0	0	0	0
OTU_981	0	0	0	0	0	0	0	0	0	0	0	0	0	0	0	0	0	0	0	0	0	0	0	0	0	0	0	0	0	0	0	0	0	0	0	0	0	0	0	0	0	0	0	0	0	0	0	0	0
OTU_1711	0	0	0	0	0	0	0	0	0	0	0	0	0	0	1	0	0	0	0	0	0	0	0	0	0	0	0	0	1	0	0	0	0	0	0	0	0	0	0	0	0	0	0	0	0	0	0	0	0
OTU_1583	0	0	0	0	0	0	0	0	0	0	0	0	0	0	0	0	0	0	0	0	0	0	0	0	0	0	0	0	0	1	0	0	0	0	0	0	0	0	0	0	0	0	0	0	0	4	0	0	0
OTU_1878	0	0	0	0	0	0	0	0	0	0	0	0	0	0	0	0	0	0	0	0	0	0	1	0	0	0	0	0	0	0	0	0	0	0	0	1	0	0	0	0	0	0	1	0	1	0	0	0	0
OTU_2133	0	0	0	0	0	0	0	0	0	0	0	0	0	0	0	0	0	0	0	0	0	1	0	0	0	0	0	0	0	0	0	0	0	0	0	0	0	0	0	0	0	0	0	0	0	0	0	0	0
OTU_1650	0	0	0	0	0	0	0	0	0	0	0	0	0	1	0	0	1	0	0	0	0	1	0	0	0	0	0	0	0	0	0	0	0	0	0	0	0	0	0	0	0	0	0	0	0	0	0	0	0
OTU_1694	0	0	0	0	0	0	0	0	0	0	0	0	0	0	0	0	0	3	0	0	0	0	0	0	0	0	0	0	0	0	0	0	0	0	0	0	0	0	0	0	0	0	0	0	0	0	0	0	0
OTU_2162	0	0	0	0	0	0	0	0	0	0	0	0	0	0	0	0	0	0	0	0	0	0	0	0	0	0	0	0	0	0	0	0	0	0	0	0	0	0	0	0	0	0	0	0	0	0	0	0	0
OTU_734	0	0	0	0	0	0	0	0	0	0	1	0	0	0	0	0	0	0	0	0	0	0	0	0	0	0	0	0	0	0	0	0	0	0	0	0	0	0	0	0	0	0	0	0	0	0	0	0	0
OTU_866	0	0	0	0	0	0	0	0	0	0	0	0	0	0	0	0	0	0	0	0	0	0	0	0	0	0	0	0	0	0	0	0	0	0	0	0	0	0	0	0	0	0	0	0	0	0	0	0	0
OTU_1713	0	0	0	0	0	0	0	0	0	0	0	0	0	0	0	0	0	0	1	0	0	0	0	0	0	0	0	0	0	0	0	0	1	0	0	0	0	0	0	0	0	0	0	0	0	0	0	0	0
OTU_1714	0	0	0	0	0	0	0	0	0	0	0	0	0	0	0	0	0	1	0	0	0	0	0	0	0	0	0	0	0	0	0	0	0	0	0	0	1	1	0	1	0	0	0	0	0	0	0	0	0
OTU_1708	0	0	0	0	0	0	0	0	0	0	0	0	0	0	0	0	0	1	0	0	0	0	0	0	0	0	0	0	0	0	0	0	0	0	0	0	0	0	0	0	0	0	1	0	0	0	0	0	0
OTU_2456	0	0	0	0	0	0	0	0	0	0	0	0	0	0	0	0	0	0	0	0	0	0	0	0	0	0	0	0	0	0	0	0	0	0	0	0	0	0	0	0	0	0	0	0	0	0	0	0	0
OTU_1120	0	0	0	0	0	2	0	0	0	0	0	0	0	0	1	0	1	0	0	0	0	0	0	0	0	0	0	0	0	0	0	0	0	0	0	2	0	0	0	0	0	0	0	0	0	1	0	0	0
OTU_2054	0	0	0	0	0	0	0	0	0	0	0	0	0	0	0	1	0	0	0	0	0	0	0	0	0	0	0	0	0	0	0	0	0	0	0	0	0	0	0	0	0	0	0	0	0	0	0	0	0
OTU_989	0	0	0	0	0	0	0	0	3	0	0	0	0	0	0	0	0	0	0	0	0	0	0	0	0	0	0	0	0	1	0	0	1	0	0	0	0	1	0	0	0	0	0	0	0	0	0	0	0
OTU_1730	0	0	0	0	0	0	0	1	0	0	0	0	0	0	0	0	0	0	0	0	0	1	2	0	0	0	1	0	0	0	0	2	0	0	0	0	0	0	0	0	0	0	0	0	0	0	1	0	0
OTU_1158	0	1	0	0	0	0	0	0	0	0	0	0	0	0	0	0	0	1	0	0	0	0	1	0	0	0	1	0	0	0	0	1	2	0	0	0	0	0	0	1	1	0	0	0	0	0	0	0	0
OTU_1886	0	0	0	0	0	0	0	0	0	0	0	0	0	0	0	0	0	0	0	1	0	0	0	0	0	0	0	0	0	0	0	0	0	0	0	0	0	1	0	0	0	0	0	0	0	0	0	0	1
OTU_1528	0	0	0	0	0	0	0	0	0	0	0	0	0	0	0	0	0	0	1	1	0	0	0	0	0	0	0	0	0	0	0	0	0	0	0	0	0	0	0	0	0	0	0	0	0	0	0	0	0
OTU_1489	0	0	0	0	0	0	0	1	0	0	0	0	0	0	0	0	0	0	0	0	0	0	0	0	2	0	0	0	0	0	0	0	0	0	0	0	0	0	0	0	0	0	0	0	0	0	0	0	0
OTU_1262	0	0	0	0	0	0	0	0	0	0	0	0	0	0	0	0	0	0	0	0	0	0	0	0	0	0	0	0	0	1	0	0	0	0	1	0	0	0	0	0	0	0	0	0	0	0	0	0	0
OTU_2573	0	0	0	0	0	0	0	0	0	0	0	0	0	0	0	0	0	0	0	0	0	0	0	0	0	0	0	0	0	0	0	1	0	0	0	0	0	0	0	0	0	0	0	0	0	0	0	0	0
[truncated: 551 more rows]
[truncated: 30 more columns]
