# Supplementary material for: Bt-modified transgenic rice shifted the composition and diversity of rhizosphere microbiota
Source: Preprints.org preprint supplement (doi:10.20944/preprints202402.1379.v1), 2024-02-23
Supplement: Supplementary file 7 [file Table S4.xlsx]

## Sheet: S4
Table S4 Sequencing counts and description of 168 predicted OTUs in ACM dataset.
OTU ID	S5T4	S1K1	S5K4	S4F4	S3F4	S5T3	S3T4	S1K3	S5F5	S2T4	S3F3	S4T4	S4K3	S5F2	S5F1	S5K5	S4K1	S2F5	S5K2	S3K5	S3K1	S5K1	S1K4	S2T2	S4F3	S4T3	S4K2	S5F3	S2F1	S1F3	S3K2	S1F4	S2K4	S1T2	S4K4	S2F3	S4F2	S4T2	S2F2	S5F4	S2K2	S1T4	S2K3	S2T5	S4F1	S3F5	S2T1	S3K4	S5K3
OTU_30	3	5	3	5	1	10	8	7	4	9	4	5	5	2	2	2	2	10	4	2	1	2	11	10	7	4	1	5	6	10	0	9	0	6	1	4	5	6	3	1	0	12	5	14	5	2	14	3	1
OTU_257	5	4	0	2	4	4	1	8	2	2	5	0	2	0	0	4	2	5	3	2	6	4	8	6	1	2	0	5	2	2	3	3	2	4	1	2	1	4	1	1	3	0	5	5	1	4	3	5	4
OTU_52	3	5	5	2	6	2	1	1	6	2	4	4	1	5	5	1	3	2	1	2	2	2	6	7	1	7	2	3	3	7	2	4	2	5	2	3	3	2	1	6	3	1	3	2	5	2	3	4	4
OTU_28	3	5	2	13	13	8	15	7	4	5	10	5	4	7	6	1	2	11	3	4	3	3	0	5	14	15	5	15	3	2	1	0	6	1	6	9	7	9	3	18	4	3	5	8	18	20	4	2	1
OTU_154	1	1	1	1	2	3	6	1	1	3	1	11	1	1	0	1	1	5	0	0	1	1	0	0	1	4	2	0	2	2	1	0	2	5	2	5	2	5	4	1	2	3	4	3	1	1	6	0	0
OTU_11	6	8	4	7	6	4	11	10	4	4	7	8	6	9	11	4	12	12	6	5	13	10	6	14	10	7	1	9	7	11	7	3	13	0	4	7	2	6	16	8	9	1	11	16	14	10	13	9	11
OTU_29	14	8	6	12	7	9	12	6	6	8	7	7	4	6	11	7	6	11	5	4	6	2	8	11	7	9	5	12	6	8	6	9	4	9	7	6	5	7	7	9	6	18	7	14	13	5	18	3	5
OTU_59	13	4	8	8	10	7	6	6	4	6	8	8	13	1	7	3	10	8	7	4	2	2	7	8	6	10	8	8	20	12	10	13	5	5	10	6	4	5	12	4	3	6	5	9	8	5	9	5	7
OTU_9	14	12	14	17	18	7	5	12	22	13	17	7	16	19	23	19	12	20	23	37	24	11	9	12	14	6	12	16	37	18	20	14	18	24	13	7	12	15	43	18	19	21	30	14	12	15	21	16	8
OTU_199	5	5	4	2	6	7	6	8	3	7	3	8	3	10	4	2	5	6	5	4	3	4	1	2	6	4	2	6	8	2	1	8	1	3	3	6	4	2	5	6	2	4	10	3	3	3	3	6	9
OTU_1	65	47	55	62	76	84	70	89	71	85	120	38	43	75	58	52	67	127	60	65	101	42	86	61	63	85	78	57	90	66	59	72	92	88	63	75	56	67	64	83	96	94	70	83	81	85	94	82	61
OTU_3	18	19	22	42	21	34	21	2	34	8	23	27	8	17	28	22	11	13	12	8	11	7	11	10	43	18	10	41	7	2	3	4	6	14	15	23	26	50	6	18	8	17	7	14	31	20	7	18	4
OTU_4	27	30	30	23	24	31	28	19	33	22	55	10	21	28	29	21	28	33	16	21	33	21	40	34	19	13	17	29	24	33	23	23	34	29	20	35	24	20	35	25	39	27	40	46	21	19	36	24	19
OTU_25	1	9	4	8	11	0	9	8	8	2	6	10	4	4	2	4	3	5	6	6	6	7	5	3	12	7	7	5	7	8	5	3	7	2	0	11	13	3	11	5	10	0	4	7	9	9	9	4	1
OTU_164	0	4	1	2	1	0	0	0	3	0	0	0	0	3	0	7	4	0	0	6	0	11	0	0	1	0	1	0	1	1	2	0	1	0	1	1	0	0	0	0	1	0	1	0	0	5	0	4	12
OTU_22	4	0	2	6	10	7	2	2	9	3	12	2	7	5	3	5	5	1	3	9	17	8	1	1	1	3	6	4	3	1	5	1	4	0	3	5	4	3	2	7	2	0	0	0	6	12	1	10	6
OTU_177	0	2	3	1	2	3	0	1	4	1	0	4	7	5	3	10	4	2	0	5	1	2	2	6	6	2	5	2	0	9	2	5	12	0	2	0	0	2	0	5	4	1	16	1	0	1	0	2	5
OTU_103	10	10	18	9	12	10	13	23	20	11	18	13	24	25	23	8	11	22	19	11	27	17	24	21	22	13	14	15	32	20	11	16	36	5	10	30	22	16	38	16	20	13	20	18	13	17	31	26	12
OTU_303	4	6	0	3	13	1	2	10	0	6	3	2	2	3	1	1	3	14	6	6	4	1	10	9	6	4	2	6	19	5	6	6	4	1	1	3	3	5	5	2	3	3	2	3	3	5	4	4	1
OTU_312	6	2	3	1	8	0	8	5	7	2	3	0	3	6	5	1	4	1	4	7	3	4	5	5	6	1	14	1	3	13	4	6	7	2	3	6	8	3	5	7	4	0	7	4	0	8	2	8	1
OTU_94	13	7	6	7	4	4	5	2	4	8	4	1	1	2	7	8	5	2	4	2	1	8	0	4	11	4	7	6	4	4	0	3	0	0	1	3	11	7	1	9	2	1	3	0	5	1	2	5	2
OTU_37	7	4	1	3	4	6	4	12	1	2	6	3	2	7	1	2	0	6	4	5	8	2	7	14	3	2	5	7	8	8	3	5	2	0	2	2	6	1	3	6	4	1	6	8	6	2	6	0	3
OTU_42	2	17	13	2	2	4	2	0	3	0	1	13	1	2	1	0	4	0	0	0	2	1	0	7	6	2	0	1	2	0	3	0	1	0	0	6	11	5	0	1	1	0	2	2	0	2	0	3	1
OTU_57	5	1	2	0	3	3	3	2	2	8	2	4	3	3	3	3	5	4	3	1	1	3	5	2	4	1	5	6	0	3	5	7	1	3	3	2	1	2	6	3	3	1	3	1	2	2	0	2	3
OTU_51	7	7	3	4	18	3	3	5	10	57	8	9	4	6	5	12	5	7	2	4	10	5	7	4	4	3	11	1	6	3	3	8	2	13	0	9	6	8	5	5	6	9	4	17	7	17	4	4	2
OTU_36	11	21	9	6	9	11	18	19	14	10	17	11	14	16	18	11	8	15	7	18	13	8	25	18	9	9	17	17	13	20	24	23	14	13	20	18	4	8	21	10	15	30	7	19	10	10	12	9	23
OTU_44	4	3	0	7	2	8	18	1	4	8	4	14	4	5	6	2	3	5	2	7	2	1	3	3	11	8	2	2	5	4	1	4	2	6	2	7	15	11	2	8	5	4	1	7	10	2	8	5	3
OTU_87	6	6	5	1	5	1	5	4	2	3	3	8	7	4	10	5	2	6	4	9	4	5	9	3	2	2	16	4	3	7	5	2	6	3	8	4	2	9	5	5	4	8	13	2	5	6	2	5	10
OTU_106	2	4	0	15	4	2	12	1	3	5	9	6	2	5	0	4	2	3	4	4	6	0	1	3	5	6	2	8	5	3	3	0	0	9	0	11	5	10	3	1	1	0	2	6	4	2	3	0	2
OTU_512	10	15	31	12	19	8	13	22	30	10	11	7	40	21	36	37	32	20	27	30	30	15	20	14	17	15	20	20	17	16	36	22	29	31	30	22	13	13	36	22	23	19	40	16	6	16	25	34	31
OTU_66	8	3	6	10	11	7	7	5	3	16	7	10	4	2	6	5	9	13	6	4	5	5	4	7	8	12	4	4	5	4	4	6	3	10	7	19	8	11	6	6	11	4	5	10	15	11	12	1	3
OTU_2	31	38	55	19	21	27	19	43	32	36	19	21	36	40	35	57	33	21	57	35	41	70	32	56	20	24	20	26	31	53	29	52	31	36	38	26	18	30	22	31	34	33	36	29	20	24	31	30	34
OTU_170	6	6	7	6	5	7	4	2	5	5	3	4	19	4	4	5	11	5	4	11	7	13	5	3	2	10	13	2	4	7	12	3	13	5	13	7	3	2	6	4	8	1	8	4	8	4	9	10	12
OTU_38	33	15	26	26	30	19	30	24	31	16	30	14	24	22	22	26	19	13	20	15	23	26	28	22	23	31	21	24	23	22	27	15	26	25	12	31	21	13	37	30	39	37	27	20	25	30	20	25	16
OTU_13	4	6	10	6	4	3	2	7	1	1	4	3	11	4	11	5	8	3	5	11	9	5	4	2	2	4	5	5	4	3	13	7	9	3	7	2	8	1	0	5	6	0	12	5	7	3	1	9	6
OTU_229	0	1	2	0	0	0	0	7	0	1	1	0	3	1	0	1	2	0	5	3	0	2	1	0	0	0	1	1	0	0	4	0	1	0	1	0	0	0	1	0	1	0	1	0	0	1	1	0	4
OTU_5	9	17	55	6	11	9	4	35	22	13	12	5	40	36	28	53	35	14	41	32	26	73	17	10	0	7	22	6	20	33	25	20	19	4	37	13	4	5	10	17	34	15	31	5	1	14	4	35	49
OTU_50	5	12	3	5	5	11	9	9	4	9	8	8	5	6	7	2	8	8	0	6	11	3	12	8	9	9	3	4	2	10	7	8	6	15	6	7	5	9	5	3	3	10	3	5	7	7	5	14	6
OTU_8	28	17	7	20	18	22	14	15	18	36	32	14	12	13	21	7	17	18	18	20	13	13	28	29	21	16	14	20	17	23	12	25	18	25	8	23	18	21	21	12	15	35	8	21	23	13	49	11	10
OTU_15	13	7	22	4	2	16	6	12	5	8	6	6	12	21	12	12	5	10	22	8	4	17	16	13	3	8	4	12	10	17	4	31	4	19	12	8	5	5	4	7	8	9	12	8	5	3	11	8	16
OTU_551	2	4	4	1	4	0	1	4	3	0	1	1	5	3	2	10	5	3	4	5	5	7	4	1	2	3	5	2	2	2	4	2	2	0	8	10	3	0	19	1	5	0	6	0	1	4	3	7	3
OTU_79	4	2	0	5	0	3	5	1	2	0	2	3	0	1	2	0	3	0	1	1	0	1	2	1	4	4	2	3	2	1	0	1	0	3	1	1	6	1	2	13	3	3	1	0	11	4	2	2	3
OTU_724	1	7	3	2	1	5	4	2	0	4	1	1	1	3	0	2	3	2	3	1	3	0	3	4	1	2	8	2	3	3	5	2	2	0	4	0	6	2	2	0	2	1	10	5	2	2	2	0	4
OTU_70	15	9	8	8	7	9	7	14	4	3	3	11	7	4	12	3	3	2	10	9	3	5	1	7	4	3	11	2	11	5	8	1	0	2	10	6	13	4	7	7	2	3	14	3	6	7	4	2	4
OTU_127	1	1	1	2	1	5	2	1	2	0	3	2	0	0	1	0	1	2	1	2	1	1	0	0	1	5	4	2	4	2	4	0	2	0	3	1	1	1	1	2	0	0	1	8	1	1	11	0	1
OTU_23	2	3	13	1	0	0	0	3	3	2	5	0	10	2	4	11	4	0	14	11	4	12	2	5	0	1	4	0	1	3	9	4	4	5	8	0	0	3	2	3	1	9	8	1	1	1	0	6	16
OTU_58	6	10	12	17	2	8	9	12	7	6	3	11	11	6	4	6	19	8	6	14	10	7	0	3	7	3	2	4	19	2	6	5	4	0	11	2	13	9	11	7	8	6	0	4	7	8	11	5	7
OTU_6	6	9	14	25	12	17	12	5	16	4	12	14	15	12	7	18	14	9	19	18	13	8	0	0	26	11	15	27	13	4	9	1	8	2	14	22	19	14	9	26	6	2	13	3	13	24	2	22	11
OTU_16	6	11	7	21	12	12	6	1	9	7	6	12	5	5	4	3	11	11	6	8	6	4	7	19	11	7	14	11	5	9	5	1	2	3	9	13	20	20	11	13	12	5	7	10	8	19	4	12	5
OTU_263	3	3	5	8	23	6	5	7	8	24	8	2	5	5	7	4	10	5	0	5	9	3	3	6	11	7	5	4	8	5	5	7	3	18	0	9	2	5	6	5	14	19	9	6	1	21	4	3	6
OTU_61	5	4	4	0	3	1	0	4	1	2	0	0	5	0	6	4	2	0	6	2	2	7	4	1	2	4	8	1	0	11	2	4	4	22	12	2	3	1	2	0	3	16	9	1	0	3	6	5	2
OTU_126	0	1	0	0	1	0	0	2	0	2	1	0	1	2	3	2	2	0	0	3	1	1	1	0	0	1	10	1	1	0	4	0	0	0	5	4	4	0	4	0	6	0	4	0	0	1	0	1	5
OTU_74	3	8	5	6	4	1	3	4	1	1	2	2	7	5	3	6	14	2	5	3	6	5	2	0	4	6	13	5	8	2	4	0	2	5	6	2	4	3	11	5	11	3	4	1	18	3	0	6	5
OTU_24	1	10	4	4	2	5	6	5	3	1	3	4	1	1	4	6	5	3	8	2	9	6	9	4	4	5	4	2	6	3	7	7	5	4	3	3	2	6	6	1	1	6	11	2	4	5	14	8	3
OTU_10	7	4	14	8	8	7	15	8	7	8	16	4	7	12	12	4	5	11	13	15	28	11	12	10	8	8	9	12	7	5	26	5	12	15	13	5	9	9	14	13	24	8	10	7	6	8	12	12	21
OTU_93	15	4	12	9	27	11	14	13	19	24	14	14	9	18	14	7	9	22	10	11	15	5	15	15	14	13	7	11	16	18	15	11	14	15	6	24	12	12	24	12	14	7	14	9	13	6	21	6	8
OTU_98	5	2	1	3	3	2	0	5	2	1	1	20	0	1	1	0	0	2	0	0	0	0	1	2	0	1	0	6	0	2	0	3	0	0	0	1	0	0	2	1	2	1	0	6	2	1	4	2	1
OTU_406	0	0	3	0	0	1	0	0	0	1	0	0	2	0	0	0	0	0	2	0	0	3	1	4	0	4	0	0	0	1	0	1	0	10	0	3	0	2	0	0	1	2	0	0	1	1	3	0	0
OTU_27	4	2	0	7	0	2	4	2	2	8	1	2	4	4	3	3	1	8	0	3	1	1	10	13	9	2	1	4	4	5	4	5	1	9	1	4	2	4	1	4	3	13	1	5	2	3	8	2	0
OTU_19	11	5	3	5	1	5	16	2	7	4	7	9	3	6	5	3	3	9	7	1	0	6	13	20	8	11	5	3	6	12	5	17	2	18	4	7	7	2	2	4	3	11	1	15	6	1	14	5	4
OTU_111	7	7	1	2	6	8	6	7	3	6	1	2	4	8	17	6	2	3	5	7	0	1	5	9	4	2	6	1	3	9	5	6	2	1	4	5	4	6	0	2	2	2	5	8	3	3	1	5	2
OTU_71	6	9	10	7	7	5	1	5	4	5	6	2	2	15	12	5	11	4	11	4	5	23	1	12	3	3	6	5	0	2	4	3	10	2	5	5	3	3	1	3	6	17	18	3	6	2	6	5	10
OTU_197	5	2	0	0	1	3	2	2	1	6	1	7	0	2	0	0	1	9	1	8	1	2	4	3	5	10	1	2	0	1	2	0	1	1	2	5	4	6	0	0	0	0	1	38	0	1	9	3	0
OTU_55	3	5	0	3	3	5	7	3	6	8	3	5	3	1	7	2	0	4	3	3	4	8	6	5	5	1	4	5	3	6	3	14	4	1	4	3	6	3	7	2	2	2	1	5	6	2	4	3	3
OTU_65	2	5	4	2	4	6	4	6	4	6	2	5	3	1	4	4	3	10	4	3	4	1	4	9	6	5	5	5	8	9	5	10	4	4	7	8	3	2	6	6	6	2	2	9	6	6	6	6	3
OTU_85	8	11	0	5	2	5	1	2	2	0	3	4	3	4	2	5	3	0	3	2	2	3	6	2	6	6	3	6	0	6	6	10	5	2	2	0	1	4	3	4	5	3	3	0	3	3	1	6	4
OTU_149	9	2	3	2	5	2	4	1	3	0	3	11	3	11	0	5	3	2	7	6	5	3	0	2	3	3	7	4	7	3	1	0	2	4	10	3	4	1	5	1	2	2	2	1	4	1	1	3	7
OTU_163	1	5	4	0	0	0	0	1	2	2	0	2	16	3	5	5	5	0	4	4	3	5	2	2	0	0	9	0	0	2	1	1	56	1	6	0	1	1	0	2	6	1	19	1	1	1	0	6	2
OTU_2351	1	0	0	3	0	1	1	0	1	0	2	2	1	6	2	4	2	0	5	0	1	1	0	0	1	3	3	4	0	1	0	0	3	3	1	0	3	0	0	1	0	3	2	0	0	3	0	0	2
OTU_67	2	2	2	0	0	4	1	13	4	3	2	7	3	1	0	2	2	0	1	2	3	6	3	0	2	1	3	0	1	5	7	4	4	3	4	2	6	1	0	1	3	1	4	0	3	6	1	7	5
OTU_602	4	3	2	5	8	1	7	8	5	2	6	2	7	3	3	7	9	8	4	2	1	7	11	2	7	3	5	1	6	2	7	3	8	3	5	4	7	8	9	4	12	3	8	8	7	9	9	5	6
OTU_7	17	23	9	19	17	15	9	16	23	10	25	17	19	14	17	21	18	15	14	11	17	12	7	13	16	13	32	8	23	5	10	12	16	10	13	16	25	20	23	23	21	9	26	19	23	17	10	15	10
OTU_18	5	6	12	14	8	5	4	8	7	11	13	6	4	8	9	3	14	6	5	11	22	16	11	8	5	4	2	4	8	6	9	12	9	3	11	14	20	6	7	15	19	4	11	9	7	13	10	7	6
OTU_17	6	2	0	6	9	6	6	0	12	3	4	5	6	7	3	4	8	2	5	3	0	3	2	2	7	3	12	7	3	2	4	0	5	5	1	6	2	10	4	6	1	7	1	2	4	7	3	3	4
OTU_90	3	2	5	1	1	2	4	1	2	3	0	3	1	4	3	1	1	1	2	0	2	2	6	5	0	3	2	0	1	5	2	4	4	7	0	12	2	4	0	3	3	4	5	0	0	3	1	1	18
OTU_269	3	1	8	4	7	5	4	12	5	5	4	1	4	4	7	5	13	10	5	21	17	12	8	6	3	1	8	4	6	6	16	5	8	5	3	4	8	4	10	5	21	6	23	7	4	12	13	17	7
OTU_46	3	8	4	1	2	4	1	6	3	0	4	2	6	3	4	7	3	4	8	4	4	12	3	11	0	3	6	2	5	3	9	7	2	1	6	4	3	2	4	3	2	1	4	0	1	1	2	4	9
OTU_227	0	0	0	0	6	1	0	1	1	1	1	0	2	0	1	4	2	0	0	3	1	6	2	0	1	0	1	0	0	5	2	2	4	3	5	7	0	0	1	3	1	5	0	0	0	8	0	2	16
OTU_56	3	8	4	7	1	4	5	3	8	9	0	2	6	6	6	2	3	2	2	0	2	3	7	2	2	5	3	9	3	3	4	5	3	13	3	2	0	7	4	4	3	10	3	2	8	3	5	6	2
OTU_116	1	1	2	0	2	1	0	2	10	0	2	0	5	2	2	9	3	1	2	8	2	0	2	0	4	3	7	2	6	2	4	0	4	0	2	0	0	0	1	3	3	1	1	0	3	0	2	4	4
OTU_21	7	14	11	4	7	4	2	7	7	7	7	6	14	8	6	2	2	8	5	12	5	4	5	14	13	2	6	9	17	5	7	4	6	1	9	1	5	10	3	7	8	6	11	3	7	4	3	4	6
OTU_32	7	15	12	7	7	10	0	9	8	7	2	4	15	13	19	7	13	9	9	10	5	22	4	5	4	2	6	2	12	2	13	9	6	1	10	4	3	3	4	11	7	4	6	2	7	12	9	7	15
OTU_196	0	0	1	0	0	0	0	1	2	1	0	0	2	0	1	1	0	0	1	0	8	0	2	0	0	0	3	4	0	1	0	2	1	5	0	0	0	0	0	0	0	11	0	0	0	1	0	0	2
OTU_150	7	7	4	2	2	5	3	4	1	5	6	3	8	4	7	1	5	10	3	5	2	2	8	6	3	1	2	1	5	8	3	10	0	6	4	4	2	5	5	8	3	7	2	3	6	3	0	1	1
OTU_34	3	5	5	8	9	3	4	1	9	9	6	3	4	1	5	4	4	1	4	8	6	6	5	4	5	5	9	2	7	3	6	2	7	2	5	6	4	4	5	1	5	1	1	10	12	5	1	1	3
OTU_225	1	1	3	5	1	0	1	1	3	10	3	6	1	1	0	1	2	2	0	2	3	1	0	4	1	1	3	1	0	2	2	2	2	2	1	1	2	2	1	3	5	1	2	4	5	3	1	1	0
OTU_140	3	5	3	1	2	4	7	2	5	1	3	5	6	9	0	4	2	10	3	2	1	10	6	1	3	2	8	5	1	8	3	2	7	3	7	9	1	4	0	3	1	9	4	7	6	4	3	4	6
OTU_43	3	3	3	0	1	1	1	3	5	2	1	4	7	2	3	5	5	3	2	3	6	1	0	1	5	2	6	6	6	2	1	2	14	0	5	1	3	3	9	3	3	0	1	1	5	5	2	4	1
OTU_45	2	5	1	9	3	1	0	0	2	6	3	0	0	3	5	0	0	0	2	2	2	1	0	2	5	1	2	5	0	1	1	0	0	13	0	1	4	4	2	1	1	13	1	5	6	3	3	2	1
OTU_102	5	2	0	10	11	8	8	1	4	0	9	7	0	8	5	1	1	1	6	5	2	2	0	5	12	16	6	8	1	0	3	0	2	0	2	6	8	8	2	7	1	0	2	3	9	5	3	4	3
OTU_41	0	5	2	4	3	0	2	10	0	0	1	2	8	4	6	8	4	0	5	9	20	9	1	1	3	2	10	1	3	4	14	0	16	0	13	2	2	1	4	4	8	0	5	1	0	6	2	9	5
OTU_815	0	0	2	2	2	3	3	0	2	5	0	2	0	1	1	1	0	8	0	0	0	3	5	7	1	4	0	3	4	8	0	6	1	1	0	5	0	4	0	1	0	0	0	6	0	1	6	2	1
OTU_40	7	6	8	16	6	9	13	23	21	14	9	10	11	12	11	14	5	12	5	9	13	4	13	13	11	14	2	12	12	15	11	18	12	12	10	8	18	13	9	21	18	15	22	21	10	10	16	11	9
OTU_84	4	4	1	5	7	6	8	2	1	2	1	10	1	4	1	1	3	3	0	0	1	1	3	0	3	9	2	0	1	1	0	2	2	0	1	4	3	6	1	0	2	2	0	7	1	3	1	2	0
OTU_619	3	4	1	1	2	2	3	6	5	1	2	0	0	2	0	3	1	4	2	2	2	5	5	7	7	1	2	6	4	8	4	8	1	8	2	12	1	3	4	3	1	2	2	4	3	6	10	2	2
OTU_31	10	9	3	7	8	11	13	7	12	9	8	16	7	16	6	6	13	18	6	7	9	11	8	3	10	13	8	10	10	3	16	7	4	13	9	11	15	7	14	3	13	11	13	19	8	14	7	13	5
OTU_92	2	3	7	1	3	1	7	3	1	5	5	6	3	4	7	5	1	2	6	3	3	5	6	8	2	1	2	1	3	12	1	9	2	4	0	1	12	3	0	3	7	3	3	2	2	4	5	3	2
OTU_237	0	1	0	2	0	0	0	2	0	1	0	0	0	0	13	0	0	0	0	0	0	0	0	0	0	0	0	0	0	0	25	0	0	0	0	0	0	0	0	0	0	0	0	0	0	0	0	0	0
OTU_343	2	0	1	3	2	1	1	1	2	14	1	3	1	4	1	2	2	0	1	1	3	1	2	1	3	6	1	2	1	3	0	1	2	1	0	1	1	6	2	0	2	5	0	2	2	2	2	0	2
OTU_49	17	10	7	16	10	4	9	8	14	8	7	9	9	7	4	6	4	9	10	7	4	3	8	24	17	4	6	8	12	13	7	34	4	15	7	9	8	15	7	6	8	20	5	11	12	8	17	6	2
OTU_325	2	6	8	3	3	6	5	2	2	2	2	1	1	3	10	3	6	6	4	1	3	12	3	10	4	6	0	4	3	3	1	0	5	3	2	0	6	2	1	4	2	0	4	1	1	2	9	2	4
OTU_423	0	2	5	0	0	0	0	0	3	0	1	0	4	2	1	3	4	0	3	12	6	5	0	0	0	0	6	0	0	0	2	0	7	0	6	0	0	0	2	1	1	0	5	0	0	1	0	9	7
OTU_47	2	2	2	2	3	1	8	2	4	4	6	3	2	0	7	0	0	4	2	2	0	2	2	1	8	6	2	2	0	0	0	3	3	3	0	10	7	6	2	7	2	7	0	12	3	8	0	2	2
OTU_444	0	1	0	0	0	1	0	0	2	0	2	1	0	0	0	0	2	1	0	0	0	0	0	0	0	0	1	0	0	0	0	0	0	1	2	0	0	0	1	0	0	0	3	0	0	0	2	0	1
OTU_112	3	3	7	3	8	7	7	4	3	9	3	2	0	5	7	3	5	4	4	3	6	8	3	3	3	7	5	6	6	3	2	6	11	18	4	11	5	8	6	5	4	11	3	3	5	10	5	4	2
OTU_64	2	4	9	1	9	2	1	12	3	1	3	1	6	8	5	11	16	2	8	11	9	13	7	2	0	2	4	8	9	8	18	3	10	0	18	5	2	5	5	2	10	4	12	3	3	6	2	4	5
OTU_281	2	0	4	0	0	0	0	2	2	0	2	0	5	2	1	3	0	0	3	2	7	5	2	0	0	0	1	1	0	1	1	0	1	1	0	0	0	1	0	1	1	0	0	5	2	0	0	3	7
OTU_125	5	3	1	1	1	4	16	4	0	8	2	4	5	2	3	3	7	4	0	1	2	1	1	4	2	1	3	5	3	0	2	3	1	4	8	1	5	4	3	1	3	14	2	2	0	1	1	1	3
OTU_119	3	0	3	4	4	2	2	2	3	2	2	2	2	6	5	4	4	3	2	0	2	0	4	5	2	3	1	7	0	0	7	2	1	1	1	10	1	3	2	3	1	2	7	5	2	7	1	0	0
OTU_304	4	4	1	5	3	3	1	6	3	5	3	4	3	2	4	7	6	2	1	1	0	5	2	6	2	2	2	1	5	3	10	1	4	0	6	2	3	1	3	2	2	1	5	8	8	6	6	3	5
OTU_68	10	9	8	3	13	3	5	8	2	9	7	7	2	6	8	6	6	15	8	4	5	4	14	13	4	4	4	3	5	15	6	13	6	13	6	5	2	6	2	10	4	17	4	5	1	8	2	5	8
OTU_246	4	3	2	4	1	7	6	1	3	11	3	3	3	1	2	1	7	5	2	2	0	2	5	5	3	5	2	7	3	2	4	5	1	6	3	9	1	12	9	2	2	1	1	15	8	2	17	8	2
OTU_245	1	1	0	1	5	2	1	0	1	13	0	1	1	2	1	0	2	3	0	1	2	4	0	0	1	2	0	2	2	0	0	1	3	1	1	0	3	1	1	3	0	1	0	1	3	0	0	0	1
OTU_72	2	5	6	5	7	2	1	3	3	10	3	3	3	7	3	3	8	6	5	4	6	0	1	2	3	1	3	5	5	0	7	0	0	4	1	3	5	0	7	5	1	2	2	1	4	6	2	10	6
OTU_2102	1	0	0	3	0	0	2	0	1	1	1	4	3	2	0	1	2	3	2	0	2	1	4	4	0	3	1	0	0	2	10	0	2	1	0	0	0	0	0	1	3	4	4	0	0	1	2	0	0
OTU_14	11	7	1	7	7	17	12	2	10	5	7	8	2	9	2	4	5	13	3	3	3	4	4	1	8	4	2	17	0	2	3	5	1	9	4	5	4	4	3	7	3	10	1	8	22	4	13	4	4
OTU_192	1	0	2	2	5	4	2	1	2	2	3	0	1	1	0	2	3	3	3	1	2	3	4	5	1	5	0	0	3	4	3	0	2	3	3	1	2	2	1	2	0	0	1	1	4	1	4	1	4
OTU_128	11	4	2	4	6	5	1	7	12	0	4	4	3	4	3	3	12	0	9	8	7	3	0	0	2	1	7	4	6	1	9	1	4	0	1	3	4	0	7	4	3	1	6	0	3	0	3	8	1
OTU_96	12	1	4	5	2	7	8	4	1	4	6	9	6	5	3	4	5	4	11	4	2	1	0	5	6	4	2	3	4	1	7	3	4	3	6	8	7	7	4	6	1	2	1	2	7	1	2	1	5
OTU_426	2	1	4	2	1	0	1	2	1	0	3	2	2	2	4	3	1	1	2	1	2	0	0	1	0	2	1	2	0	0	2	2	2	1	0	0	0	1	1	3	3	2	1	3	0	2	0	1	3
OTU_193	4	2	2	0	2	0	1	3	3	1	0	6	0	3	2	5	6	0	1	2	5	1	0	3	1	4	4	1	2	3	0	0	0	1	5	2	2	0	10	2	4	1	0	0	2	4	7	2	1
OTU_188	0	0	0	0	0	0	0	0	0	0	1	0	0	0	0	25	0	0	0	0	0	0	0	0	0	0	0	0	0	0	0	0	0	0	0	0	0	0	0	0	0	0	0	0	0	0	0	0	0
OTU_60	9	2	5	3	4	8	12	4	5	9	2	6	1	7	5	2	3	2	2	6	1	6	7	5	9	2	0	3	1	2	1	6	7	2	2	1	2	2	7	2	0	1	5	2	1	3	2	3	7
OTU_12	8	7	1	5	4	6	6	8	3	3	4	5	8	4	5	3	6	2	4	7	6	7	5	2	6	0	4	4	14	3	9	9	8	5	4	5	2	4	10	8	6	5	12	2	7	3	4	14	3
OTU_20	0	2	2	7	9	5	7	0	0	7	4	5	6	4	2	2	4	2	5	2	3	3	3	2	5	2	15	10	1	0	1	0	2	2	8	5	16	4	3	2	2	1	1	6	14	8	2	14	0
OTU_956	0	0	0	0	1	3	0	0	0	0	1	0	0	0	0	0	1	0	1	0	1	0	1	1	0	1	0	1	0	2	0	0	0	2	0	0	1	2	0	0	1	4	0	5	0	1	0	1	0
OTU_189	0	2	4	6	2	4	6	2	3	3	1	4	3	6	5	3	2	0	9	9	1	4	5	1	4	1	11	8	2	1	3	0	6	1	7	2	4	2	2	0	3	4	6	1	0	3	0	5	5
OTU_287	1	3	2	2	0	1	0	7	1	0	2	1	2	2	2	9	7	1	8	6	8	2	0	0	5	1	5	3	1	0	1	0	0	0	1	3	3	1	3	2	3	0	1	1	0	6	0	9	6
OTU_120	11	8	5	5	5	4	4	6	5	4	4	2	3	3	12	8	4	3	11	9	6	7	4	8	3	3	8	3	7	3	8	5	19	4	6	1	3	5	5	8	6	2	5	2	7	8	3	7	7
OTU_306	0	0	0	0	2	0	0	3	2	0	2	7	2	1	1	1	2	0	0	0	5	7	0	0	0	0	2	0	2	0	0	0	4	0	2	1	0	0	6	0	1	0	0	0	1	10	0	4	0
OTU_114	8	4	8	11	8	10	7	7	15	17	17	2	17	14	2	10	8	10	9	4	17	3	5	10	7	10	6	9	8	30	10	8	9	4	15	6	11	5	18	9	19	2	5	8	16	5	9	9	6
OTU_161	0	3	2	5	7	0	0	1	2	6	2	3	1	3	0	1	5	5	2	6	2	5	1	0	3	3	0	0	3	1	2	0	4	0	1	3	2	2	7	1	0	0	0	1	2	3	0	1	2
OTU_157	3	1	0	5	2	0	2	1	0	1	5	1	2	4	0	2	0	6	1	3	5	0	1	3	9	5	1	6	2	0	1	3	3	5	1	2	3	3	1	2	2	1	2	8	3	0	5	3	0
OTU_158	2	0	0	0	3	2	5	13	3	1	0	0	2	2	1	0	0	1	0	0	0	1	4	2	2	2	0	2	1	1	0	3	0	3	1	2	0	2	1	1	0	1	1	3	0	0	3	1	0
OTU_69	3	7	3	4	3	2	1	8	7	1	12	4	6	6	5	6	9	5	1	8	7	13	4	3	4	4	3	13	5	14	0	12	9	1	13	9	10	1	5	7	6	4	9	5	9	6	1	7	4
OTU_368	0	1	0	6	0	0	1	1	0	0	0	1	8	0	1	0	3	1	0	5	3	1	9	0	5	1	6	0	0	7	5	5	2	3	6	1	2	7	1	0	2	3	3	0	1	0	2	2	1
OTU_35	4	0	3	6	2	8	2	1	7	3	8	19	0	3	4	1	1	4	3	1	2	1	2	4	4	5	1	4	5	2	4	2	5	10	1	3	3	10	6	3	1	2	0	5	5	1	10	1	0
OTU_75	4	6	3	2	3	2	2	2	10	1	3	15	10	7	5	10	6	1	7	12	7	9	4	3	7	1	6	6	6	6	4	1	2	0	13	2	9	1	13	2	4	0	6	0	4	4	2	7	4
OTU_62	2	1	2	2	2	4	0	7	3	2	3	0	0	3	2	2	2	5	1	1	2	3	3	0	3	0	3	2	1	3	2	0	0	0	0	1	0	2	0	4	1	1	1	2	2	2	5	1	2
OTU_604	4	5	7	2	7	4	4	11	4	3	3	0	5	4	4	10	4	5	8	5	5	11	5	2	4	6	5	2	11	6	6	4	2	7	4	2	7	5	4	5	4	4	9	4	3	1	2	3	8
OTU_159	2	1	0	3	9	3	3	0	0	0	5	4	0	3	2	1	0	3	0	0	0	0	0	0	3	5	0	1	0	0	0	0	0	0	0	1	3	5	1	5	0	0	0	0	9	3	0	1	1
OTU_486	4	1	2	0	4	0	0	0	1	3	1	0	0	0	0	1	0	1	1	0	0	0	0	1	0	3	0	0	3	0	0	0	1	3	2	2	0	0	1	1	1	1	0	2	0	2	2	2	1
OTU_592	0	0	0	0	0	0	0	0	0	0	0	0	0	0	0	0	0	0	0	0	0	0	0	0	0	0	0	0	0	0	0	0	0	0	0	0	0	0	0	0	0	0	0	0	0	0	0	0	0
OTU_717	0	0	0	0	1	0	0	0	0	0	0	0	0	0	0	1	0	0	0	0	0	0	0	0	0	0	0	0	0	0	0	0	10	0	0	0	0	0	0	0	0	0	0	0	1	0	0	0	0
OTU_390	0	0	0	1	0	0	0	1	0	1	0	1	0	0	0	0	1	2	1	0	0	0	1	0	12	1	0	1	2	1	0	0	0	0	0	0	2	1	1	0	1	0	0	0	1	1	0	1	0
OTU_448	1	3	3	2	4	3	0	0	2	2	2	1	6	2	1	3	13	0	0	2	2	2	1	0	3	2	1	3	2	2	13	4	5	2	5	0	4	2	4	3	2	1	5	1	0	1	2	4	5
OTU_100	4	9	4	1	6	2	0	4	3	0	0	2	9	7	7	13	3	0	7	6	6	2	0	0	5	1	5	4	0	0	1	1	1	0	8	2	7	2	2	8	6	2	1	0	1	2	0	2	7
OTU_152	4	2	4	3	3	2	3	2	2	1	3	3	4	1	5	1	0	2	2	1	1	2	2	0	5	3	3	4	1	1	1	0	2	2	28	3	2	1	2	4	1	2	0	2	1	3	5	1	1
OTU_630	0	0	2	0	0	0	0	1	0	0	0	0	1	0	0	0	0	0	0	0	0	0	0	0	0	0	0	1	0	2	0	0	3	1	0	0	0	0	0	0	0	0	1	0	0	0	0	0	0
OTU_26	0	2	0	3	10	2	3	3	1	7	13	3	6	3	1	2	6	5	5	4	4	1	0	3	3	8	2	2	14	0	1	0	1	0	1	4	7	2	3	0	1	0	2	0	6	6	7	12	0
OTU_1416	0	0	0	1	1	0	0	1	0	0	0	0	0	0	0	0	0	1	1	2	0	0	0	0	0	0	2	1	1	0	12	0	0	1	1	0	0	0	0	0	0	0	2	0	1	1	1	0	0
OTU_108	2	4	1	2	2	3	7	2	4	7	0	4	6	3	3	2	4	5	1	0	7	0	2	6	1	4	3	2	5	7	5	2	1	3	2	3	5	5	10	3	2	5	4	5	6	4	5	2	2
OTU_73	0	0	2	2	2	4	4	0	2	0	2	1	3	1	2	0	3	8	2	0	2	2	1	3	1	3	1	2	0	1	3	3	1	1	0	1	6	7	2	3	1	0	1	4	1	1	1	0	1
OTU_48	0	3	3	3	2	3	0	0	1	5	2	9	0	0	1	0	3	3	3	6	1	1	1	3	1	6	10	8	8	0	1	0	8	0	1	0	4	1	0	3	1	0	1	3	3	2	1	0	4
OTU_53	0	6	2	1	1	0	0	1	4	0	1	3	3	4	0	3	2	0	5	1	0	0	0	0	3	1	1	1	6	1	3	0	3	0	2	2	3	0	12	3	5	0	0	0	1	0	1	2	4
OTU_259	2	1	1	2	4	0	1	3	0	5	1	4	1	0	0	0	0	1	0	0	0	0	1	0	0	10	0	0	4	0	0	0	1	0	1	2	1	2	3	0	1	0	0	1	4	2	4	0	0
OTU_176	0	3	3	1	2	1	0	1	1	0	1	1	6	0	3	1	0	0	8	1	2	1	1	1	0	0	1	1	0	0	0	1	2	3	1	1	6	0	0	0	0	1	2	1	1	2	0	1	3
OTU_214	0	1	3	4	2	10	3	0	1	0	4	3	0	1	3	0	2	1	5	2	2	1	1	1	1	1	2	0	0	0	2	3	0	2	0	1	2	0	3	2	1	1	0	0	0	0	0	1	1
OTU_424	0	3	1	3	1	1	0	4	0	1	1	2	0	1	1	0	0	0	0	0	0	0	4	1	1	0	1	1	1	2	3	3	0	0	2	0	0	1	0	0	5	0	0	1	0	1	14	0	4
OTU_413	0	0	0	0	0	0	0	0	0	0	0	0	0	1	0	0	0	0	0	2	0	16	0	0	0	0	1	0	0	0	0	0	3	1	1	0	0	0	0	0	1	0	1	0	0	0	0	1	1
OTU_1173	0	1	0	0	0	0	0	0	0	0	0	0	0	0	0	0	0	0	0	0	0	0	0	0	0	0	0	0	0	1	0	2	0	5	0	0	0	0	0	0	0	1	0	0	0	0	0	0	0
OTU_591	0	1	0	0	0	0	0	1	1	0	0	0	0	0	0	0	0	2	0	0	0	0	0	0	1	2	1	0	0	0	0	10	0	2	0	0	0	0	0	0	0	0	0	0	0	0	0	0	0
OTU_282	0	0	0	0	2	0	1	0	0	0	0	1	0	0	0	0	0	0	0	0	0	0	0	0	0	0	0	0	1	0	0	0	0	0	0	0	0	0	0	0	0	0	0	1	0	1	0	0	0
OTU_826	0	1	0	0	0	0	0	0	0	0	0	0	0	0	0	0	0	0	0	1	0	0	0	0	0	0	0	0	0	0	0	0	0	0	0	0	0	0	0	0	0	0	0	0	0	0	0	0	0
OTU_2435	0	0	0	0	0	0	0	0	0	0	1	1	0	0	1	0	0	0	0	0	0	0	0	0	0	0	0	1	0	0	0	0	0	0	0	0	0	1	0	0	0	0	1	0	0	0	0	0	0
OTU_223	0	0	0	0	0	0	0	0	0	0	0	0	0	0	0	0	0	0	0	0	0	0	0	0	0	0	0	0	0	0	0	0	0	0	0	0	0	0	0	0	0	0	0	0	39	0	0	0	0
OTU_399	0	0	0	0	0	0	0	0	0	0	0	0	0	0	0	0	0	0	0	0	0	0	0	0	0	0	0	0	0	0	0	0	0	0	0	0	0	0	0	0	0	0	0	0	0	0	0	0	0
OTU_734	0	0	0	0	0	0	0	0	0	0	1	0	0	0	0	0	0	0	0	0	0	0	0	0	0	0	0	0	0	0	0	0	0	0	0	0	0	0	0	0	0	0	0	0	0	0	0	0	0
[truncated: 30 more columns]
