# Supplementary material for: Bt-modified transgenic rice shifted the composition and diversity of rhizosphere microbiota
Source: Preprints.org preprint supplement (doi:10.20944/preprints202402.1379.v1), 2024-02-23
Supplement: Supplementary file 8 [file Table S5.xlsx]

## Sheet: S5
Table S5 Summary of 16S rDNA pyrosequencing.
Total read counts	Total read length (bp)	Minimum read length (bp)	Maximum read length (bp)	Average read length (bp)	N50 (bp)
481757	206750070	45	1196	429	431
