# Supplementary material for: Bt-modified transgenic rice shifted the composition and diversity of rhizosphere microbiota
Source: Preprints.org preprint supplement (doi:10.20944/preprints202402.1379.v1), 2024-02-23
Supplement: Supplementary file 9 [file Table S6.xlsx]

## Sheet: S6
Table S6 Statistical test results of ACM OTUs from different treatments.
OTU ID	p-value(Treatment)	qvalue(p-value(Treatment))	p-value(CK vs. GM)	qvalue(p-value(CK vs. GM))	Ratio(CK vs. GM)	Fold-Change(CK vs. GM)	Fold-Change(CK vs. GM) (Description)	p-value(CK vs. NonGM)	qvalue(p-value(CK vs. NonGM))	Ratio(CK vs. NonGM)	Fold-Change(CK vs. NonGM)	Fold-Change(CK vs. NonGM) (Description)	p-value(GM vs. NonGM)	qvalue(p-value(GM vs. NonGM))	Ratio(GM vs. NonGM)	Fold-Change(GM vs. NonGM)	Fold-Change(GM vs. NonGM) (Description)	F(Treatment)	SS(Treatment)	SS(Error)	F(Error)
OTU_423	9.35018e-16	3.94785e-14	1.52024e-15	7.85457e-14	4.63544	4.63544	CK up vs GM	2.05956e-12	1.49318e-10	3.5697	3.5697	CK up vs NonGM	0.0757611	0.135798	0.770089	-1.29855	GM down vs NonGM	60.6189	63.52	35.1032	1
OTU_163	3.52383e-12	7.4392e-11	1.29528e-10	1.33846e-09	3.95931	3.95931	CK up vs GM	2.28446e-11	8.28116e-10	4.27085	4.27085	CK up vs NonGM	0.670441	0.470663	1.07869	1.07869	GM up vs NonGM	40.108	62.917	52.5511	1
OTU_551	7.11467e-12	1.00132e-10	1.9717e-12	5.09356e-11	3.72852	3.72852	CK up vs GM	0.00406418	0.00866626	1.57644	1.57644	CK up vs NonGM	2.36164e-07	2.24355e-05	0.422807	-2.36515	GM down vs NonGM	38.5803	43.1339	37.4541	1
OTU_64	3.78521e-11	3.9955e-10	5.87347e-12	1.01154e-10	3.82102	3.82102	CK up vs GM	4.25778e-06	5.14482e-05	2.23642	2.23642	CK up vs NonGM	0.00111374	0.0117561	0.585293	-1.70854	GM down vs NonGM	35.072	43.296	41.3555	1
OTU_5	1.7512e-10	1.47879e-09	4.18404e-11	5.40438e-10	4.18818	4.18818	CK up vs GM	1.15387e-06	1.67311e-05	2.6481	2.6481	CK up vs NonGM	0.0122542	0.0582076	0.63228	-1.58158	GM down vs NonGM	32.0071	50.6938	53.0583	1
OTU_41	9.44353e-10	6.64545e-09	1.66693e-10	1.43542e-09	4.49714	4.49714	CK up vs GM	1.29916e-05	0.000117736	2.55897	2.55897	CK up vs NonGM	0.00520338	0.0290777	0.569021	-1.7574	GM down vs NonGM	28.7936	54.7913	63.7469	1
OTU_287	6.30674e-09	3.80407e-08	9.69198e-10	7.15361e-09	3.64605	3.64605	CK up vs GM	0.00140286	0.00442206	1.83408	1.83408	CK up vs NonGM	0.000257407	0.00570548	0.503031	-1.98795	GM down vs NonGM	25.3609	40.1347	53.0153	1
OTU_29	7.63801e-09	4.03117e-08	2.25801e-09	1.4583e-08	0.514328	-1.94428	CK down vs GM	5.85194e-06	6.06093e-05	0.622403	-1.60668	CK down vs NonGM	0.0468923	0.117231	1.21013	1.21013	GM up vs NonGM	25.0253	11.0933	14.8499	1
OTU_35	2.2253e-08	1.04397e-07	3.54057e-09	2.03255e-08	0.315137	-3.17323	CK down vs GM	0.000193314	0.0010781	0.511382	-1.95549	CK down vs NonGM	0.00487227	0.0290777	1.62273	1.62273	GM up vs NonGM	23.1867	32.0092	46.2467	1
OTU_126	1.9392e-07	7.83393e-07	3.24018e-08	1.67409e-07	2.78616	2.78616	CK up vs GM	0.000508918	0.00230603	1.82018	1.82018	CK up vs NonGM	0.00989226	0.0494613	0.653293	-1.53071	GM down vs NonGM	19.6391	25.2193	43.0186	1
OTU_512	2.04094e-07	7.83393e-07	5.44103e-08	2.55564e-07	1.82239	1.82239	CK up vs GM	5.95038e-05	0.000392184	1.52229	1.52229	CK up vs NonGM	0.0649189	0.130049	0.835325	-1.19714	GM down vs NonGM	19.5581	8.98131	15.3836	1
OTU_229	2.40093e-07	8.44771e-07	8.04813e-07	2.446e-06	2.26918	2.26918	CK up vs GM	9.57225e-07	1.67311e-05	2.25398	2.25398	CK up vs NonGM	0.963734	0.558261	0.993301	-1.00674	GM down vs NonGM	19.3014	20.9113	36.2942	1
OTU_19	5.1574e-07	1.67505e-06	8.27636e-08	3.56343e-07	0.372495	-2.6846	CK down vs GM	0.00330219	0.00772285	0.606466	-1.6489	CK down vs NonGM	0.00340511	0.0278656	1.62812	1.62812	GM up vs NonGM	18.11	23.3059	43.1116	1
OTU_23	7.76994e-07	2.34332e-06	2.54998e-05	4.8796e-05	2.80291	2.80291	CK up vs GM	4.18644e-07	1.01172e-05	3.58927	3.58927	CK up vs NonGM	0.271077	0.286137	1.28055	1.28055	GM up vs NonGM	17.4824	43.3638	83.0943	1
OTU_154	1.23893e-06	3.48736e-06	3.07202e-07	1.22093e-06	0.405428	-2.46653	CK down vs GM	0.0462997	0.05889	0.724496	-1.38027	CK down vs NonGM	0.000384312	0.00570548	1.78699	1.78699	GM up vs NonGM	16.7773	20.1988	40.3319	1
OTU_13	1.90528e-06	5.02782e-06	3.73118e-07	1.37698e-06	2.60053	2.60053	CK up vs GM	0.000747433	0.00318758	1.82033	1.82033	CK up vs NonGM	0.0350359	0.0978945	0.699983	-1.42861	GM down vs NonGM	16.1355	22.1522	45.9918	1
OTU_27	2.78233e-06	6.91037e-06	4.715e-07	1.62405e-06	0.362633	-2.75761	CK down vs GM	0.0076018	0.0137783	0.60623	-1.64954	CK down vs NonGM	0.00519271	0.0290777	1.67175	1.67175	GM up vs NonGM	15.5776	24.6089	52.922	1
OTU_44	3.53922e-06	8.30188e-06	6.75186e-07	2.18029e-06	0.396841	-2.5199	CK down vs GM	0.00126762	0.00417739	0.567269	-1.76283	CK down vs NonGM	0.0336484	0.0968667	1.42946	1.42946	GM up vs NonGM	15.2264	20.6425	45.4161	1
OTU_14	6.93888e-06	1.54197e-05	1.36189e-06	3.90914e-06	0.42393	-2.35888	CK down vs GM	0.00164638	0.00497344	0.588253	-1.69995	CK down vs NonGM	0.0422214	0.111418	1.38762	1.38762	GM up vs NonGM	14.2569	17.8203	41.8731	1
OTU_30	8.31848e-06	1.75612e-05	2.89555e-06	7.87386e-06	0.399294	-2.50442	CK down vs GM	0.000275437	0.00133128	0.501567	-1.99375	CK down vs NonGM	0.198879	0.234914	1.25613	1.25613	GM up vs NonGM	13.9991	21.5975	51.683	1
OTU_8	9.79719e-06	1.96981e-05	4.37264e-06	1.1296e-05	0.605895	-1.65045	CK down vs GM	0.000180122	0.0010781	0.67204	-1.48801	CK down vs NonGM	0.294196	0.302509	1.10917	1.10917	GM up vs NonGM	13.7677	6.60502	16.0716	1
OTU_53	1.04081e-05	1.99751e-05	1.63611e-05	3.2759e-05	2.3312	2.3312	CK up vs GM	0.711071	0.351115	1.07012	1.07012	CK up vs NonGM	4.4316e-05	0.00210501	0.459045	-2.17844	GM down vs NonGM	13.6824	21.7013	53.1336	1
OTU_46	2.72744e-05	5.0069e-05	5.38576e-06	1.32507e-05	2.3898	2.3898	CK up vs GM	0.00384248	0.00844182	1.69498	1.69498	CK up vs NonGM	0.050253	0.117961	0.709257	-1.40993	GM down vs NonGM	12.3449	18.3086	49.6836	1
OTU_32	2.92143e-05	5.13955e-05	6.33311e-06	1.48732e-05	2.30166	2.30166	CK up vs GM	0.0529783	0.062966	1.39797	1.39797	CK up vs NonGM	0.00381318	0.0278656	0.607376	-1.64643	GM down vs NonGM	12.251	16.9302	46.2952	1
OTU_49	4.65008e-05	7.66097e-05	1.42242e-05	3.06216e-05	0.577165	-1.73261	CK down vs GM	0.00107723	0.0041105	0.669584	-1.49347	CK down vs NonGM	0.200064	0.234914	1.16012	1.16012	GM up vs NonGM	11.6205	7.6462	22.0427	1
OTU_246	4.71755e-05	7.66097e-05	2.70062e-05	4.98329e-05	0.450093	-2.22176	CK down vs GM	0.369627	0.233026	0.852174	-1.17347	CK down vs NonGM	0.000458624	0.00570548	1.89333	1.89333	GM up vs NonGM	11.6011	17.3854	50.2029	1
OTU_164	6.23546e-05	9.75093e-05	1.22789e-05	2.7583e-05	2.3878	2.3878	CK up vs GM	0.00694175	0.0132441	1.67075	1.67075	CK up vs NonGM	0.0516291	0.117961	0.6997	-1.42918	GM down vs NonGM	11.2271	18.2131	54.3451	1
OTU_170	6.77455e-05	0.000102156	0.0003539	0.000481179	1.72258	1.72258	CK up vs GM	4.17431e-05	0.000302637	1.8845	1.8845	CK up vs NonGM	0.527043	0.413052	1.094	1.094	GM up vs NonGM	11.1166	11.085	33.405	1
OTU_159	7.95988e-05	0.000112126	0.0282491	0.0197234	0.635728	-1.573	CK down vs GM	1.52791e-05	0.000123081	0.389769	-2.56562	CK down vs NonGM	0.0158117	0.0643887	0.613107	-1.63104	GM down vs NonGM	10.9023	21.2575	65.3186	1
OTU_815	7.96687e-05	0.000112126	1.64852e-05	3.2759e-05	0.368688	-2.71232	CK down vs GM	0.00594589	0.0119744	0.543043	-1.84147	CK down vs NonGM	0.0698159	0.130049	1.47291	1.47291	GM up vs NonGM	10.9012	24.0515	73.9117	1
OTU_197	0.000199666	0.000271946	0.000212063	0.000332018	0.387	-2.58398	CK down vs GM	0.744233	0.356225	0.923692	-1.08261	CK down vs NonGM	0.000480462	0.00570548	2.3868	2.3868	GM up vs NonGM	9.69998	27.2095	93.9712	1
OTU_75	0.000230296	0.000303863	6.80491e-05	0.000121237	2.32888	2.32888	CK up vs GM	0.175322	0.141232	1.31336	1.31336	CK up vs NonGM	0.0044603	0.0290777	0.563943	-1.77323	GM down vs NonGM	9.51632	18.0059	63.3857	1
OTU_269	0.000274292	0.000350946	0.000135037	0.000218029	1.82886	1.82886	CK up vs GM	0.0012435	0.00417739	1.65286	1.65286	CK up vs NonGM	0.48995	0.396094	0.903766	-1.10648	GM down vs NonGM	9.29242	9.86129	35.5508	1
OTU_120	0.000409735	0.00049714	0.00010085	0.000173686	1.67841	1.67841	CK up vs GM	0.00790115	0.0139715	1.40903	1.40903	CK up vs NonGM	0.1578	0.217261	0.839506	-1.19118	GM down vs NonGM	8.78284	6.58016	25.0984	1
OTU_47	0.000412103	0.00049714	0.000277297	0.000389667	0.466812	-2.14219	CK down vs GM	0.00102066	0.0041105	0.505668	-1.97758	CK down vs NonGM	0.681759	0.472753	1.08324	1.08324	GM up vs NonGM	8.77556	16.5207	63.0665	1
OTU_413	0.000582137	0.000682753	0.00262617	0.00264876	1.5041	1.5041	CK up vs GM	0.000245734	0.00127255	1.65868	1.65868	CK up vs NonGM	0.446488	0.379718	1.10277	1.10277	GM up vs NonGM	8.34188	6.79978	27.3071	1
OTU_116	0.000603064	0.000688181	0.000124935	0.000208226	2.27164	2.27164	CK up vs GM	0.0336344	0.0451573	1.5479	1.5479	CK up vs NonGM	0.0557001	0.119145	0.681402	-1.46756	GM down vs NonGM	8.29779	16.0861	64.9432	1
OTU_69	0.000648302	0.000720336	0.0122226	0.00942538	1.52118	1.52118	CK up vs GM	0.189844	0.148692	0.805955	-1.24076	CK down vs NonGM	0.000167562	0.00530613	0.529823	-1.88742	GM down vs NonGM	8.20764	10.4038	42.4636	1
OTU_106	0.000823623	0.000891672	0.000245444	0.000362323	0.458784	-2.17968	CK down vs GM	0.00687697	0.0132441	0.570714	-1.75219	CK down vs NonGM	0.270983	0.286137	1.24397	1.24397	GM up vs NonGM	7.9107	15.2863	64.7338	1
OTU_84	0.000937727	0.000989823	0.000240086	0.000362323	0.439977	-2.27285	CK down vs GM	0.14889	0.124075	0.734245	-1.36194	CK down vs NonGM	0.0158493	0.0643887	1.66883	1.66883	GM up vs NonGM	7.75063	16.5728	71.6316	1
OTU_3	0.00101158	0.0010232	0.000478021	0.000602384	0.493857	-2.02488	CK down vs GM	0.00309934	0.00772285	0.554583	-1.80316	CK down vs NonGM	0.539141	0.413052	1.12296	1.12296	GM up vs NonGM	7.65738	13.5011	59.0654	1
OTU_79	0.00101782	0.0010232	0.000476212	0.000602384	0.496102	-2.01571	CK down vs GM	0.00316245	0.00772285	0.557524	-1.79364	CK down vs NonGM	0.53376	0.413052	1.12381	1.12381	GM up vs NonGM	7.64983	13.3065	58.2714	1
OTU_66	0.00119991	0.00117821	0.000279052	0.000389667	0.597373	-1.67399	CK down vs GM	0.0209969	0.0317141	0.72799	-1.37365	CK down vs NonGM	0.13691	0.202568	1.21865	1.21865	GM up vs NonGM	7.44816	6.41933	28.8726	1
OTU_125	0.00178231	0.0017103	0.0346554	0.0232536	0.673821	-1.48407	CK down vs GM	0.145022	0.122257	1.30993	1.30993	CK up vs NonGM	0.000419915	0.00570548	1.94402	1.94402	GM up vs NonGM	6.96737	11.1595	53.6565	1
OTU_100	0.00184466	0.0017308	0.00045121	0.000597756	2.32745	2.32745	CK up vs GM	0.134709	0.116366	1.41423	1.41423	CK up vs NonGM	0.0294347	0.0898211	0.607632	-1.64573	GM down vs NonGM	6.92586	17.3404	83.8746	1
OTU_406	0.00197945	0.00181688	0.00211044	0.00237042	0.564841	-1.77041	CK down vs GM	0.93334	0.412605	0.985118	-1.01511	CK down vs NonGM	0.00220068	0.0209065	1.74406	1.74406	GM up vs NonGM	6.84085	10.4246	51.0498	1
OTU_448	0.00278501	0.0025019	0.000638981	0.000786048	1.89286	1.89286	CK up vs GM	0.0486901	0.060394	1.42988	1.42988	CK up vs NonGM	0.11201	0.180354	0.755407	-1.32379	GM down vs NonGM	6.43178	9.74714	50.7681	1
OTU_67	0.00402214	0.00353799	0.00845133	0.00704278	1.68849	1.68849	CK up vs GM	0.00180068	0.00502113	1.87308	1.87308	CK up vs NonGM	0.584481	0.43721	1.10932	1.10932	GM up vs NonGM	5.99604	10.6757	59.6455	1
OTU_12	0.00459563	0.00395996	0.00135051	0.00162271	1.79883	1.79883	CK up vs GM	0.254594	0.174133	1.22347	1.22347	CK up vs NonGM	0.0280471	0.0898211	0.680148	-1.47027	GM down vs NonGM	5.8392	8.59519	49.3113	1
OTU_2	0.00495448	0.00418378	0.0403269	0.0257229	1.22232	1.22232	CK up vs GM	0.00125497	0.00417739	1.38188	1.38188	CK up vs NonGM	0.195802	0.234914	1.13054	1.13054	GM up vs NonGM	5.75101	2.53296	14.7546	1
OTU_73	0.00529286	0.00438189	0.0182301	0.0130818	0.640691	-1.56081	CK down vs GM	0.00174423	0.00502113	0.548819	-1.82209	CK down vs NonGM	0.392688	0.351937	0.856605	-1.1674	GM down vs NonGM	5.67368	9.17365	54.1654	1
OTU_158	0.00590007	0.00479065	0.00141358	0.00165988	0.558295	-1.79117	CK down vs GM	0.0793894	0.0822247	0.732153	-1.36584	CK down vs NonGM	0.117946	0.186748	1.31141	1.31141	GM up vs NonGM	5.54688	8.11837	49.0303	1
OTU_343	0.00612082	0.00487612	0.00147125	0.00168922	0.602199	-1.66058	CK down vs GM	0.0793325	0.0822247	0.761555	-1.3131	CK down vs NonGM	0.121091	0.188584	1.26462	1.26462	GM up vs NonGM	5.50409	6.14708	37.4135	1
OTU_45	0.00662903	0.00508026	0.00870344	0.00708665	0.566457	-1.76536	CK down vs GM	0.00367875	0.00833468	0.531009	-1.88321	CK down vs NonGM	0.754329	0.495922	0.937421	-1.06676	GM down vs NonGM	5.41134	11.433	70.7784	1
OTU_28	0.00664347	0.00508026	0.0221927	0.0157072	0.581069	-1.72096	CK down vs GM	0.00215122	0.00577643	0.477051	-2.09621	CK down vs NonGM	0.387496	0.351274	0.820988	-1.21805	GM down vs NonGM	5.40881	13.8935	86.0505	1
OTU_177	0.00673803	0.00508026	0.00240288	0.00253365	1.99611	1.99611	CK up vs GM	0.0180873	0.0298029	1.70043	1.70043	CK up vs NonGM	0.456916	0.379718	0.85187	-1.17389	GM down vs NonGM	5.3924	12.3654	76.8192	1
OTU_157	0.00710535	0.00523622	0.00246462	0.00254677	0.537244	-1.86135	CK down vs GM	0.0198831	0.0317141	0.624347	-1.60167	CK down vs NonGM	0.439265	0.379718	1.16213	1.16213	GM up vs NonGM	5.33082	9.93044	62.405	1
OTU_281	0.00719291	0.00523622	0.0126275	0.0094621	1.70318	1.70318	CK up vs GM	0.00320951	0.00772285	1.88727	1.88727	CK up vs NonGM	0.61514	0.442714	1.10809	1.10809	GM up vs NonGM	5.31663	10.9651	69.0909	1
OTU_486	0.00800737	0.00573032	0.00218713	0.00240429	0.521995	-1.91573	CK down vs GM	0.214555	0.158727	0.774432	-1.29127	CK down vs NonGM	0.0521511	0.117961	1.4836	1.4836	GM up vs NonGM	5.19254	10.3259	66.6183	1
OTU_128	0.00856334	0.00602605	0.00232205	0.00249943	2.01486	2.01486	CK up vs GM	0.209171	0.156339	1.32383	1.32383	CK up vs NonGM	0.0564369	0.119145	0.657034	-1.52199	GM down vs NonGM	5.11508	11.9617	78.3404	1
OTU_74	0.00875743	0.00606161	0.00266585	0.00264876	1.79238	1.79238	CK up vs GM	0.0315744	0.0431914	1.50782	1.50782	CK up vs NonGM	0.347975	0.344007	0.841237	-1.18873	GM down vs NonGM	5.08926	8.5056	55.9881	1
OTU_368	0.00893219	0.00608285	0.00382777	0.00373147	1.93321	1.93321	CK up vs GM	0.0156584	0.0264007	1.7256	1.7256	CK up vs NonGM	0.599232	0.4379	0.89261	-1.12031	GM down vs NonGM	5.0665	11.7158	77.4655	1
OTU_956	0.0110561	0.00740971	0.0087783	0.00708665	0.608422	-1.64359	CK down vs GM	0.921209	0.40974	0.981892	-1.01844	CK down vs NonGM	0.00979855	0.0494613	1.61383	1.61383	GM up vs NonGM	4.8217	7.80457	54.2243	1
OTU_25	0.0138405	0.00913089	0.248941	0.104569	1.2577	1.2577	CK up vs GM	0.0808547	0.0825629	0.705084	-1.41827	CK down vs NonGM	0.0037716	0.0278656	0.560614	-1.78376	GM down vs NonGM	4.56561	8.47844	62.2103	1
OTU_259	0.014422	0.00936811	0.00404339	0.00386867	0.536281	-1.86469	CK down vs GM	0.234872	0.165323	0.778134	-1.28513	CK down vs NonGM	0.0734298	0.134151	1.45098	1.45098	GM up vs NonGM	4.51888	9.45639	70.1034	1
OTU_98	0.0159266	0.0101887	0.0074696	0.00643215	0.55274	-1.80917	CK down vs GM	0.0204489	0.0317141	0.600354	-1.66568	CK down vs NonGM	0.695442	0.478746	1.08614	1.08614	GM up vs NonGM	4.40642	9.72239	73.9148	1
OTU_127	0.0168233	0.0106018	0.00467524	0.00439189	0.58323	-1.71459	CK down vs GM	0.224209	0.162552	0.797714	-1.25358	CK down vs NonGM	0.0867904	0.149911	1.36775	1.36775	GM up vs NonGM	4.34449	7.04556	54.3277	1
OTU_56	0.0179906	0.0111706	0.00566711	0.00522858	0.614619	-1.62702	CK down vs GM	0.333083	0.213704	0.84703	-1.1806	CK down vs NonGM	0.058364	0.120534	1.37814	1.37814	GM up vs NonGM	4.26879	5.91419	46.4125	1
OTU_61	0.0184506	0.0112902	0.0936738	0.0493858	1.50346	1.50346	CK up vs GM	0.00498482	0.0103257	2.00645	2.00645	CK up vs NonGM	0.22278	0.258099	1.33456	1.33456	GM up vs NonGM	4.24033	11.65	92.0389	1
OTU_263	0.0227047	0.0136949	0.00700504	0.00624012	0.599186	-1.66893	CK down vs GM	0.0620347	0.0671271	0.705142	-1.41815	CK down vs NonGM	0.36903	0.347107	1.17683	1.17683	GM up vs NonGM	4.00732	6.48866	54.2433	1
OTU_108	0.0237207	0.0141062	0.00668808	0.00606229	0.642481	-1.55647	CK down vs GM	0.228205	0.163264	0.825125	-1.21194	CK down vs NonGM	0.110252	0.180354	1.28428	1.28428	GM up vs NonGM	3.95833	4.72511	39.9894	1
OTU_31	0.02407	0.0141151	0.00736134	0.00643215	0.722261	-1.38454	CK down vs GM	0.310554	0.20284	0.88668	-1.1278	CK down vs NonGM	0.0793422	0.139583	1.22765	1.22765	GM up vs NonGM	3.94199	2.60956	22.1767	1
OTU_306	0.0247471	0.0143134	0.0126365	0.0094621	1.67162	1.67162	CK up vs GM	0.703883	0.351115	1.07953	1.07953	CK up vs NonGM	0.0290964	0.0898211	0.645799	-1.54847	GM down vs NonGM	3.911	7.511	64.3361	1
OTU_93	0.0254383	0.0145143	0.097831	0.0510566	0.837373	-1.19421	CK down vs GM	0.00719815	0.0133812	0.745956	-1.34056	CK down vs NonGM	0.267519	0.286137	0.890829	-1.12255	GM down vs NonGM	3.88025	2.07203	17.8888	1
OTU_22	0.0294116	0.0165413	0.0287668	0.0198131	1.68136	1.68136	CK up vs GM	0.867595	0.395602	0.961837	-1.03968	CK down vs NonGM	0.0166408	0.0643887	0.57206	-1.74807	GM down vs NonGM	3.71865	9.60482	86.5264	1
OTU_16	0.0297743	0.0165413	0.0117814	0.00922278	0.653119	-1.53111	CK down vs GM	0.0425809	0.0561293	0.711714	-1.40506	CK down vs NonGM	0.595116	0.4379	1.08972	1.08972	GM up vs NonGM	3.70504	4.79115	43.3203	1
OTU_96	0.0302902	0.0166094	0.00843467	0.00704278	0.616994	-1.62076	CK down vs GM	0.177586	0.141483	0.784742	-1.2743	CK down vs NonGM	0.171492	0.229461	1.27188	1.27188	GM up vs NonGM	3.68596	5.57398	50.6593	1
OTU_227	0.0319949	0.0173192	0.00975593	0.00775472	1.80544	1.80544	CK up vs GM	0.0860325	0.0854433	1.47245	1.47245	CK up vs NonGM	0.351249	0.344007	0.815562	-1.22615	GM down vs NonGM	3.62524	8.54224	78.9369	1
OTU_65	0.0326928	0.017473	0.0578143	0.0335626	0.76625	-1.30506	CK down vs GM	0.0115247	0.0198938	0.69884	-1.43094	CK down vs NonGM	0.497213	0.396935	0.912027	-1.09646	GM down vs NonGM	3.60133	3.27398	30.4549	1
OTU_50	0.0410612	0.0214937	0.0138021	0.0100438	0.696677	-1.43539	CK down vs GM	0.398913	0.239557	0.885736	-1.12901	CK down vs NonGM	0.0904712	0.153478	1.27137	1.27137	GM up vs NonGM	3.34978	3.26932	32.6954	1
OTU_18	0.0412339	0.0214937	0.0473737	0.0291386	1.3332	1.3332	CK up vs GM	0.746845	0.356225	0.954904	-1.04723	CK down vs NonGM	0.0193294	0.0706268	0.71625	-1.39616	GM down vs NonGM	3.34516	3.23928	32.4396	1
OTU_312	0.044049	0.0225855	0.0133597	0.00986073	1.68513	1.68513	CK up vs GM	0.286003	0.188502	1.24712	1.24712	CK up vs NonGM	0.138599	0.202568	0.740074	-1.35122	GM down vs NonGM	3.2726	6.59266	67.4858	1
OTU_161	0.0443983	0.0225855	0.243883	0.103284	1.25646	1.25646	CK up vs GM	0.190736	0.148692	0.773621	-1.29262	CK down vs NonGM	0.0129435	0.0585541	0.615713	-1.62413	GM down vs NonGM	3.26393	5.88079	60.3587	1
OTU_390	0.0483755	0.0243157	0.664726	0.22737	0.934318	-1.0703	CK down vs GM	0.0221173	0.0327246	0.693762	-1.44142	CK down vs NonGM	0.0553193	0.119145	0.742533	-1.34674	GM down vs NonGM	3.1699	3.68896	38.9855	1
OTU_103	0.0563355	0.0279836	0.26905	0.109456	1.12757	1.12757	CK up vs GM	0.204696	0.154588	0.87112	-1.14795	CK down vs NonGM	0.0169444	0.0643887	0.772564	-1.29439	GM down vs NonGM	3.00353	1.66557	18.577	1
OTU_11	0.0574686	0.0282146	0.0547035	0.0321176	1.46679	1.46679	CK up vs GM	0.820546	0.378915	0.956366	-1.04562	CK down vs NonGM	0.0289465	0.0898211	0.652011	-1.53372	GM down vs NonGM	2.98184	5.46799	61.431	1
OTU_71	0.0594554	0.0286118	0.0494936	0.0300844	1.41784	1.41784	CK up vs GM	0.0301068	0.0419759	1.47211	1.47211	CK up vs NonGM	0.826488	0.509847	1.03828	1.03828	GM up vs NonGM	2.94484	4.28544	48.7503	1
OTU_51	0.059633	0.0286118	0.0291444	0.0198131	0.635946	-1.57246	CK down vs GM	0.0520075	0.0628424	0.669206	-1.49431	CK down vs NonGM	0.798175	0.502163	1.0523	1.0523	GM up vs NonGM	2.9416	5.79393	65.9834	1
OTU_55	0.0610979	0.0289853	0.106952	0.0552585	0.780527	-1.28119	CK down vs GM	0.0207185	0.0317141	0.698186	-1.43228	CK down vs NonGM	0.454874	0.379718	0.894506	-1.11794	GM down vs NonGM	2.91521	3.20319	36.8092	1
OTU_6	0.0659561	0.0309424	0.0822878	0.0438303	1.48795	1.48795	CK up vs GM	0.659469	0.336701	0.905097	-1.10485	CK down vs NonGM	0.0273246	0.0898211	0.608285	-1.64396	GM down vs NonGM	2.83214	6.86778	81.2357	1
OTU_102	0.0695756	0.0322817	0.0775396	0.0421706	0.635106	-1.57454	CK down vs GM	0.0284908	0.0405016	0.567252	-1.76289	CK down vs NonGM	0.649711	0.460616	0.89316	-1.11962	GM down vs NonGM	2.77424	8.50038	102.645	1
OTU_40	0.0758782	0.0348233	0.038928	0.025141	0.778161	-1.28508	CK down vs GM	0.0592216	0.0670869	0.795694	-1.25676	CK down vs NonGM	0.848857	0.520267	1.02253	1.02253	GM up vs NonGM	2.68046	1.81618	22.6983	1
OTU_52	0.0783618	0.0355764	0.314137	0.125715	0.870196	-1.14917	CK down vs GM	0.0251452	0.0364606	0.730514	-1.3689	CK down vs NonGM	0.196357	0.234914	0.839482	-1.19121	GM down vs NonGM	2.6457	2.37578	30.0823	1
OTU_140	0.0811108	0.0364327	0.942307	0.295066	0.987298	-1.01287	CK down vs GM	0.0604576	0.0671271	1.39944	1.39944	CK up vs NonGM	0.046658	0.117231	1.41744	1.41744	GM up vs NonGM	2.60852	3.86004	49.5728	1
OTU_26	0.0843012	0.0374672	0.510742	0.185833	1.17172	1.17172	CK up vs GM	0.137318	0.117124	0.697382	-1.43393	CK down vs NonGM	0.0302555	0.0898211	0.59518	-1.68016	GM down vs NonGM	2.56695	7.04502	91.9409	1
OTU_604	0.0936169	0.0411741	0.0381665	0.0249612	1.33161	1.33161	CK up vs GM	0.10024	0.0982083	1.25321	1.25321	CK up vs NonGM	0.648291	0.460616	0.941119	-1.06256	GM down vs NonGM	2.45428	2.15053	29.3538	1
OTU_87	0.0951061	0.0413979	0.0797224	0.0429061	1.30141	1.30141	CK up vs GM	0.044938	0.0581787	1.35333	1.35333	CK up vs NonGM	0.787901	0.500814	1.03989	1.03989	GM up vs NonGM	2.43735	2.55306	35.0904	1
OTU_245	0.102179	0.0437983	0.0377528	0.0249612	0.66982	-1.49294	CK down vs GM	0.134824	0.116366	0.751125	-1.33134	CK down vs NonGM	0.537662	0.413052	1.12138	1.12138	GM up vs NonGM	2.36048	4.03188	57.2207	1
OTU_72	0.102696	0.0437983	0.137483	0.0676503	1.32707	1.32707	CK up vs GM	0.583348	0.310976	0.901444	-1.10933	CK down vs NonGM	0.0394463	0.107068	0.679272	-1.47216	GM down vs NonGM	2.35508	3.98768	56.7229	1
OTU_119	0.11278	0.0476181	0.0621826	0.0353052	0.718272	-1.39223	CK down vs GM	0.0756434	0.0806493	0.729913	-1.37003	CK down vs NonGM	0.925213	0.545274	1.01621	1.01621	GM up vs NonGM	2.25497	3.27961	48.722	1
OTU_1173	0.114431	0.0478369	0.0460367	0.028987	0.756644	-1.32162	CK down vs GM	0.578456	0.310653	0.926263	-1.07961	CK down vs NonGM	0.136361	0.202568	1.22417	1.22417	GM up vs NonGM	2.23946	2.01364	30.1219	1
OTU_1416	0.118235	0.0489427	0.0465662	0.028987	1.33506	1.33506	CK up vs GM	0.132413	0.116366	1.24243	1.24243	CK up vs NonGM	0.607639	0.440655	0.930623	-1.07455	GM down vs NonGM	2.20459	2.13929	32.5079	1
OTU_257	0.119726	0.0490786	0.708794	0.239353	1.06965	1.06965	CK up vs GM	0.0550332	0.0643534	1.41986	1.41986	CK up vs NonGM	0.111424	0.180354	1.3274	1.3274	GM up vs NonGM	2.19123	3.37435	51.5877	1
OTU_2435	0.136117	0.055261	0.0587406	0.0337215	0.777119	-1.2868	CK down vs GM	0.65006	0.334251	0.941989	-1.06158	CK down vs NonGM	0.138266	0.202568	1.21216	1.21216	GM up vs NonGM	2.0548	1.68833	27.5253	1
OTU_17	0.137676	0.0553619	0.207744	0.0925297	0.77558	-1.28936	CK down vs GM	0.0491482	0.060394	0.670109	-1.49229	CK down vs NonGM	0.457036	0.379718	0.864011	-1.15739	GM down vs NonGM	2.04271	3.89581	63.8906	1
OTU_90	0.142461	0.0567453	0.253856	0.104927	0.7858	-1.27259	CK down vs GM	0.427525	0.254062	1.18199	1.18199	CK up vs NonGM	0.0503349	0.117961	1.50418	1.50418	GM up vs NonGM	2.00648	4.20555	70.2153	1
OTU_149	0.148378	0.0581989	0.0517296	0.0310779	1.51015	1.51015	CK up vs GM	0.28239	0.187828	1.25298	1.25298	CK up vs NonGM	0.362326	0.34421	0.829706	-1.20525	GM down vs NonGM	1.96337	4.06297	69.3243	1
OTU_282	0.148977	0.0581989	0.0546075	0.0321176	0.754832	-1.3248	CK down vs GM	0.448261	0.263969	0.896128	-1.11591	CK down vs NonGM	0.226643	0.25899	1.18719	1.18719	GM up vs NonGM	1.95911	1.93502	33.0881	1
OTU_34	0.150364	0.0581989	0.141895	0.0691628	1.30544	1.30544	CK up vs GM	0.73984	0.356225	0.941955	-1.06162	CK down vs NonGM	0.0671861	0.130049	0.72156	-1.38589	GM down vs NonGM	1.9493	2.99545	51.4787	1
OTU_619	0.151623	0.0581989	0.509216	0.185833	0.885739	-1.129	CK down vs GM	0.058014	0.0667622	0.70284	-1.4228	CK down vs NonGM	0.200295	0.234914	0.793507	-1.26023	GM down vs NonGM	1.94048	3.09949	53.5089	1
OTU_60	0.160572	0.0610786	0.0629594	0.0353577	0.699257	-1.43009	CK down vs GM	0.537038	0.297678	0.889239	-1.12456	CK down vs NonGM	0.198403	0.234914	1.27169	1.27169	GM up vs NonGM	1.87986	3.21486	57.2904	1
OTU_724	0.162625	0.0613069	0.206764	0.0925297	1.24338	1.24338	CK up vs GM	0.0612512	0.0671271	1.38441	1.38441	CK up vs NonGM	0.522461	0.413052	1.11343	1.11343	GM up vs NonGM	1.86645	2.60367	46.732	1
OTU_114	0.178947	0.0665976	0.228731	0.0993088	1.19897	1.19897	CK up vs GM	0.557596	0.303953	0.91572	-1.09204	CK down vs NonGM	0.069509	0.130049	0.763754	-1.30932	GM down vs NonGM	1.76562	1.88269	35.7212	1
OTU_43	0.179814	0.0665976	0.0758398	0.041685	1.41251	1.41251	CK up vs GM	0.619983	0.321063	1.10011	1.10011	CK up vs NonGM	0.186581	0.234914	0.778836	-1.28397	GM down vs NonGM	1.76054	3.08557	58.7131	1
OTU_189	0.182174	0.0668853	0.150138	0.0718254	1.33386	1.33386	CK up vs GM	0.0830277	0.0836043	1.41655	1.41655	CK up vs NonGM	0.756933	0.495922	1.062	1.062	GM up vs NonGM	1.74681	3.2686	62.6846	1
OTU_196	0.187519	0.0682542	0.355536	0.137085	0.818498	-1.22175	CK down vs GM	0.381194	0.238246	1.20897	1.20897	CK up vs NonGM	0.0683494	0.130049	1.47707	1.47707	GM up vs NonGM	1.7164	3.80089	74.1844	1
OTU_38	0.192024	0.0692966	0.0757087	0.041685	0.844938	-1.18352	CK down vs GM	0.526965	0.297678	0.942334	-1.06119	CK down vs NonGM	0.236533	0.261287	1.11527	1.11527	GM up vs NonGM	1.69145	0.70493	13.9615	1
OTU_225	0.2268	0.0811524	0.133202	0.066174	0.77875	-1.28411	CK down vs GM	0.13354	0.116366	0.778923	-1.28382	CK down vs NonGM	0.998906	0.564857	1.00022	1.00022	GM up vs NonGM	1.51703	1.96171	43.3196	1
OTU_37	0.22938	0.0813861	0.941981	0.295066	0.986444	-1.01374	CK down vs GM	0.133974	0.116366	0.753198	-1.32767	CK down vs NonGM	0.144525	0.208029	0.763549	-1.30967	GM down vs NonGM	1.50521	2.51057	55.8753	1
OTU_10	0.240165	0.0845024	0.164642	0.0759511	1.202	1.202	CK up vs GM	0.123387	0.113235	1.2267	1.2267	CK up vs NonGM	0.874261	0.529012	1.02055	1.02055	GM up vs NonGM	1.45723	1.19397	27.448	1
OTU_602	0.246076	0.0858669	0.147827	0.0713806	1.22757	1.22757	CK up vs GM	0.968182	0.42389	1.00562	1.00562	CK up vs NonGM	0.150027	0.212725	0.8192	-1.2207	GM down vs NonGM	1.43187	1.34163	31.3889	1
OTU_68	0.251697	0.0871083	0.123637	0.0620184	0.780213	-1.2817	CK down vs GM	0.77725	0.365913	0.955796	-1.04625	CK down vs NonGM	0.196725	0.234914	1.22505	1.22505	GM up vs NonGM	1.40833	1.70476	40.5513	1
OTU_591	0.256444	0.0880295	0.196415	0.0890187	0.830084	-1.2047	CK down vs GM	0.12221	0.113235	0.799785	-1.25034	CK down vs NonGM	0.790758	0.500814	0.963499	-1.03788	GM down vs NonGM	1.38886	1.35176	32.605	1
OTU_223	0.265083	0.0902613	1	0.30754	1	1	No change between CK and GM	0.164919	0.13587	0.828206	-1.20743	CK down vs NonGM	0.155763	0.217261	0.828206	-1.20743	GM down vs NonGM	1.35437	1.16631	28.8483	1
OTU_214	0.267916	0.0904961	0.111965	0.0572758	0.733027	-1.36421	CK down vs GM	0.563326	0.304784	0.894049	-1.11851	CK down vs NonGM	0.29614	0.302509	1.21967	1.21967	GM up vs NonGM	1.34332	2.38659	59.5174	1
OTU_1	0.277343	0.0929368	0.155448	0.0728247	0.908042	-1.10127	CK down vs GM	0.171383	0.13961	0.911349	-1.09727	CK down vs NonGM	0.956016	0.557187	1.00364	1.00364	GM up vs NonGM	1.30737	0.281604	7.21583	1
OTU_303	0.280528	0.093264	0.391054	0.147478	0.856015	-1.1682	CK down vs GM	0.112226	0.108485	0.748388	-1.33621	CK down vs NonGM	0.448205	0.379718	0.87427	-1.14381	GM down vs NonGM	1.2955	2.00748	51.9108	1
OTU_94	0.282918	0.0933237	0.36547	0.139871	0.804302	-1.24331	CK down vs GM	0.113919	0.108673	0.681928	-1.46643	CK down vs NonGM	0.482587	0.395222	0.847851	-1.17945	GM down vs NonGM	1.28669	3.51207	91.4392	1
OTU_59	0.291355	0.094873	0.316314	0.125715	0.876061	-1.14147	CK down vs GM	0.121319	0.113235	0.814113	-1.22833	CK down vs NonGM	0.569143	0.429116	0.929288	-1.07609	GM down vs NonGM	1.25619	1.03098	27.4941	1
OTU_717	0.294304	0.094873	0.156456	0.0728247	1.17565	1.17565	CK up vs GM	0.193995	0.149624	1.15968	1.15968	CK up vs NonGM	0.901767	0.542202	0.986411	-1.01378	GM down vs NonGM	1.24575	0.758881	20.4075	1
OTU_304	0.294356	0.094873	0.123094	0.0620184	1.3182	1.3182	CK up vs GM	0.537873	0.297678	1.11577	1.11577	CK up vs NonGM	0.33873	0.33873	0.846437	-1.18142	GM down vs NonGM	1.24556	1.86267	50.0974	1
OTU_176	0.360079	0.115177	0.156412	0.0728247	1.31421	1.31421	CK up vs GM	0.388432	0.239557	1.17997	1.17997	CK up vs NonGM	0.565251	0.429116	0.897853	-1.11377	GM down vs NonGM	1.03716	1.8009	58.1682	1
OTU_188	0.373551	0.118588	0.223589	0.0978991	1.16762	1.16762	CK up vs GM	0.220089	0.161176	1.16901	1.16901	CK up vs NonGM	0.992324	0.564857	1.00119	1.00119	GM up vs NonGM	0.999315	0.759849	25.4724	1
OTU_112	0.37762	0.118985	0.173328	0.0792504	0.795904	-1.25643	CK down vs GM	0.339144	0.215683	0.85241	-1.17314	CK down vs NonGM	0.673791	0.470663	1.071	1.071	GM up vs NonGM	0.988159	1.29901	44.0384	1
OTU_325	0.381989	0.11947	0.410576	0.152794	0.849868	-1.17665	CK down vs GM	0.599094	0.312477	1.10934	1.10934	CK up vs NonGM	0.170112	0.229461	1.30531	1.30531	GM up vs NonGM	0.97632	1.80036	61.775	1
OTU_592	0.389176	0.119941	0.24204	0.103284	0.878663	-1.13809	CK down vs GM	1	0.431548	1	1	No change between CK and NonGM	0.231728	0.25899	1.13809	1.13809	GM up vs NonGM	0.957143	0.549265	19.2243	1
OTU_399	0.389176	0.119941	1	0.30754	1	1	No change between CK and GM	0.24204	0.167123	0.890132	-1.12343	CK down vs NonGM	0.231728	0.25899	0.890132	-1.12343	GM down vs NonGM	0.957143	0.444649	15.5627	1
OTU_24	0.396215	0.121185	0.217838	0.0961964	1.21935	1.21935	CK up vs GM	0.258741	0.175315	1.19912	1.19912	CK up vs NonGM	0.914869	0.545274	0.983409	-1.01687	GM down vs NonGM	0.93871	1.1399	40.68	1
OTU_7	0.399311	0.121185	0.523203	0.187723	1.08095	1.08095	CK up vs GM	0.491164	0.284875	0.919462	-1.08759	CK down vs NonGM	0.177123	0.233704	0.850602	-1.17564	GM down vs NonGM	0.930708	0.654244	23.5489	1
OTU_150	0.401823	0.121185	0.240833	0.103284	0.808562	-1.23676	CK down vs GM	0.238835	0.166495	0.807823	-1.23789	CK down vs NonGM	0.99586	0.564857	0.999086	-1.00092	GM down vs NonGM	0.924265	1.42395	51.6113	1
OTU_630	0.411841	0.123325	0.658158	0.22737	0.929623	-1.0757	CK down vs GM	0.399812	0.239557	1.14928	1.14928	CK up vs NonGM	0.191051	0.234914	1.23628	1.23628	GM up vs NonGM	0.898968	1.15807	43.1553	1
OTU_426	0.417842	0.124241	0.345701	0.134295	1.17479	1.17479	CK up vs GM	0.201643	0.153886	1.24452	1.24452	CK up vs NonGM	0.729284	0.491362	1.05935	1.05935	GM up vs NonGM	0.884117	1.21557	46.059	1
OTU_2102	0.427866	0.126332	0.837613	0.27218	1.04091	1.04091	CK up vs GM	0.229696	0.163264	1.26643	1.26643	CK up vs NonGM	0.307149	0.310417	1.21666	1.21666	GM up vs NonGM	0.859794	1.5598	60.7743	1
OTU_20	0.49052	0.143825	0.341776	0.133776	0.80188	-1.24707	CK down vs GM	0.268172	0.180023	0.772993	-1.29367	CK down vs NonGM	0.871267	0.529012	0.963977	-1.03737	GM down vs NonGM	0.719916	1.82927	85.1219	1
OTU_15	0.49437	0.143954	0.252587	0.104927	1.23763	1.23763	CK up vs GM	0.392326	0.239557	1.1724	1.1724	CK up vs NonGM	0.765373	0.498017	0.947299	-1.05563	GM down vs NonGM	0.711931	1.16094	54.6282	1
OTU_734	0.504863	0.146003	0.260906	0.106985	0.898956	-1.1124	CK down vs GM	0.743889	0.356225	0.96965	-1.0313	CK down vs NonGM	0.412931	0.363226	1.07864	1.07864	GM up vs NonGM	0.690488	0.291195	14.1277	1
OTU_21	0.511731	0.146983	0.380852	0.144686	1.15413	1.15413	CK up vs GM	0.852405	0.391135	0.970106	-1.03081	CK down vs NonGM	0.278334	0.290569	0.840553	-1.18969	GM down vs NonGM	0.676699	0.853768	42.2658	1
OTU_826	0.528516	0.150778	0.668908	0.22737	0.956743	-1.04521	CK down vs GM	0.503967	0.287698	1.07162	1.07162	CK up vs NonGM	0.264107	0.286137	1.12007	1.12007	GM up vs NonGM	0.64379	0.326018	16.9646	1
OTU_42	0.537456	0.152299	0.319306	0.125935	0.782158	-1.27851	CK down vs GM	0.920838	0.40974	0.975868	-1.02473	CK down vs NonGM	0.358856	0.34421	1.24766	1.24766	GM up vs NonGM	0.626698	1.79564	95.9855	1
OTU_70	0.552494	0.155517	0.876586	0.283064	0.969422	-1.03154	CK down vs GM	0.318393	0.206103	0.818522	-1.22171	CK down vs NonGM	0.38825	0.351274	0.84434	-1.18436	GM down vs NonGM	0.598598	1.13504	63.5212	1
OTU_85	0.580019	0.162183	0.304063	0.122734	1.21394	1.21394	CK up vs GM	0.500812	0.287698	1.13508	1.13508	CK up vs NonGM	0.714857	0.488571	0.935039	-1.06947	GM down vs NonGM	0.549146	0.919368	56.0849	1
OTU_9	0.612994	0.170276	0.411066	0.152794	1.09667	1.09667	CK up vs GM	0.970562	0.42389	0.995877	-1.00414	CK down vs NonGM	0.380043	0.350525	0.908094	-1.10121	GM down vs NonGM	0.492992	0.293124	19.9185	1
OTU_444	0.639212	0.176398	0.517854	0.187103	1.10255	1.10255	CK up vs GM	0.802663	0.375439	0.963024	-1.0384	CK down vs NonGM	0.360231	0.34421	0.873452	-1.14488	GM down vs NonGM	0.450522	0.485444	36.0968	1
OTU_199	0.674593	0.184953	0.662981	0.22737	1.07664	1.07664	CK up vs GM	0.666695	0.33801	0.929621	-1.07571	CK down vs NonGM	0.376702	0.350525	0.863446	-1.15815	GM down vs NonGM	0.395968	0.538429	45.5526	1
OTU_4	0.686409	0.186199	0.976133	0.303817	0.997494	-1.00251	CK down vs GM	0.451478	0.263969	0.938664	-1.06534	CK down vs NonGM	0.459659	0.379718	0.941023	-1.06267	GM down vs NonGM	0.378403	0.126287	11.1802	1
OTU_192	0.687955	0.186199	0.737667	0.244513	0.938783	-1.06521	CK down vs GM	0.394225	0.239557	0.851246	-1.17475	CK down vs NonGM	0.595882	0.4379	0.906754	-1.10284	GM down vs NonGM	0.376127	0.633967	56.4647	1
OTU_237	0.704392	0.189433	0.650579	0.227116	0.909268	-1.09979	CK down vs GM	0.716759	0.351115	1.07914	1.07914	CK up vs NonGM	0.405152	0.359714	1.18682	1.18682	GM up vs NonGM	0.35226	0.735526	69.9487	1
OTU_92	0.766514	0.204835	0.501422	0.185049	0.884968	-1.12998	CK down vs GM	0.557527	0.303953	0.898907	-1.11246	CK down vs NonGM	0.929835	0.545274	1.01575	1.01575	GM up vs NonGM	0.26696	0.416958	52.3228	1
OTU_62	0.785872	0.208687	0.788863	0.257961	1.05022	1.05022	CK up vs GM	0.685384	0.345072	0.928532	-1.07697	CK down vs NonGM	0.49199	0.396094	0.884134	-1.13105	GM down vs NonGM	0.241829	0.38374	53.1585	1
OTU_58	0.797982	0.210579	0.532874	0.189875	1.15021	1.15021	CK up vs GM	0.593839	0.312477	1.12707	1.12707	CK up vs NonGM	0.926125	0.545274	0.979885	-1.02053	GM down vs NonGM	0.226431	0.539176	79.7698	1
OTU_152	0.819856	0.215007	0.573351	0.202898	0.893073	-1.11973	CK down vs GM	0.595248	0.312477	0.898821	-1.11257	CK down vs NonGM	0.973911	0.560737	1.00644	1.00644	GM up vs NonGM	0.199216	0.380124	63.9213	1
OTU_36	0.825348	0.215111	0.755726	0.2487	1.03773	1.03773	CK up vs GM	0.537136	0.297678	1.07633	1.07633	CK up vs NonGM	0.753823	0.495922	1.03719	1.03719	GM up vs NonGM	0.192501	0.129313	22.5038	1
OTU_2351	0.876332	0.226998	0.609492	0.21422	0.902719	-1.10776	CK down vs GM	0.76757	0.363718	0.942538	-1.06096	CK down vs NonGM	0.825517	0.509847	1.04411	1.04411	GM up vs NonGM	0.132271	0.251331	63.6544	1
OTU_193	0.929109	0.237229	0.738273	0.244513	0.933807	-1.07088	CK down vs GM	0.987054	0.428512	0.996681	-1.00333	CK down vs NonGM	0.745124	0.495922	1.06733	1.06733	GM up vs NonGM	0.0736096	0.146526	66.6844	1
OTU_111	0.929538	0.237229	0.914225	0.289785	0.980446	-1.01994	CK down vs GM	0.712994	0.351115	0.934756	-1.0698	CK down vs NonGM	0.790171	0.500814	0.953398	-1.04888	GM down vs NonGM	0.0731469	0.116595	53.3984	1
OTU_48	0.936578	0.237229	0.722363	0.242351	0.917631	-1.08976	CK down vs GM	0.89451	0.40284	0.968442	-1.03259	CK down vs NonGM	0.819781	0.509847	1.05537	1.05537	GM up vs NonGM	0.0655865	0.181891	92.9053	1
OTU_424	0.938302	0.237229	0.909001	0.289785	0.978363	-1.02212	CK down vs GM	0.819883	0.378915	1.04455	1.04455	CK up vs NonGM	0.726661	0.491362	1.06765	1.06765	GM up vs NonGM	0.0637438	0.110717	58.1862	1
OTU_57	0.960735	0.241455	0.88607	0.28435	1.026	1.026	CK up vs GM	0.894583	0.40284	0.97654	-1.02402	CK down vs NonGM	0.778004	0.500814	0.951792	-1.05065	GM down vs NonGM	0.0400804	0.0610021	50.9869	1
