# Supplementary material for: Bt-modified transgenic rice shifted the composition and diversity of rhizosphere microbiota
Source: Preprints.org preprint supplement (doi:10.20944/preprints202402.1379.v1), 2024-02-23
Supplement: Supplementary file 10 [file Table S7.xlsx]

## Sheet: S7
Table S7 Statistical test of GM ACM OTUs from different rice developmental stages.
OTU ID	p-value(Treatment)	qvalue(p-value(Treatment))	p-value(GM_StageI vs. GM_StageII)	qvalue(p-value(GM_StageI vs. GM_StageII))	Ratio(GM_StageI vs. GM_StageII)	Fold-Change(GM_StageI vs. GM_StageII)	Fold-Change(GM_StageI vs. GM_StageII) (Description)	p-value(GM_StageI vs. GM_StageIII)	qvalue(p-value(GM_StageI vs. GM_StageIII))	Ratio(GM_StageI vs. GM_StageIII)	Fold-Change(GM_StageI vs. GM_StageIII)	Fold-Change(GM_StageI vs. GM_StageIII) (Description)	p-value(GM_StageI vs. GM_StageIV)	qvalue(p-value(GM_StageI vs. GM_StageIV))	Ratio(GM_StageI vs. GM_StageIV)	Fold-Change(GM_StageI vs. GM_StageIV)	Fold-Change(GM_StageI vs. GM_StageIV) (Description)	p-value(GM_StageI vs. GM_StageV)	qvalue(p-value(GM_StageI vs. GM_StageV))	Ratio(GM_StageI vs. GM_StageV)	Fold-Change(GM_StageI vs. GM_StageV)	Fold-Change(GM_StageI vs. GM_StageV) (Description)	p-value(GM_StageII vs. GM_StageIII)	qvalue(p-value(GM_StageII vs. GM_StageIII))	Ratio(GM_StageII vs. GM_StageIII)	Fold-Change(GM_StageII vs. GM_StageIII)	Fold-Change(GM_StageII vs. GM_StageIII) (Description)	p-value(GM_StageII vs. GM_StageIV)	qvalue(p-value(GM_StageII vs. GM_StageIV))	Ratio(GM_StageII vs. GM_StageIV)	Fold-Change(GM_StageII vs. GM_StageIV)	Fold-Change(GM_StageII vs. GM_StageIV) (Description)	p-value(GM_StageII vs. GM_StageV)	qvalue(p-value(GM_StageII vs. GM_StageV))	Ratio(GM_StageII vs. GM_StageV)	Fold-Change(GM_StageII vs. GM_StageV)	Fold-Change(GM_StageII vs. GM_StageV) (Description)	p-value(GM_StageIII vs. GM_StageIV)	qvalue(p-value(GM_StageIII vs. GM_StageIV))	Ratio(GM_StageIII vs. GM_StageIV)	Fold-Change(GM_StageIII vs. GM_StageIV)	Fold-Change(GM_StageIII vs. GM_StageIV) (Description)	p-value(GM_StageIII vs. GM_StageV)	qvalue(p-value(GM_StageIII vs. GM_StageV))	Ratio(GM_StageIII vs. GM_StageV)	Fold-Change(GM_StageIII vs. GM_StageV)	Fold-Change(GM_StageIII vs. GM_StageV) (Description)	p-value(GM_StageIV vs. GM_StageV)	qvalue(p-value(GM_StageIV vs. GM_StageV))
OTU_11	2.4149e-07	7.24469e-06	7.30732e-08	3.41008e-06	0.10781	-9.27557	GM_StageI down vs GM_StageII	9.09446e-08	8.67471e-06	0.111308	-8.98407	GM_StageI down vs GM_StageIII	7.42366e-07	1.58371e-05	0.149234	-6.70088	GM_StageI down vs GM_StageIV	1.56006e-06	4.71484e-05	0.147614	-6.77444	GM_StageI down vs GM_StageV	0.904807	0.926784	1.03245	1.03245	GM_StageII up vs GM_StageIII	0.2322	0.409434	1.38423	1.38423	GM_StageII up vs GM_StageIV	0.274814	0.420474	1.3692	1.3692	GM_StageII up vs GM_StageV	0.279617	0.779761	1.34073	1.34073	GM_StageIII up vs GM_StageIV	0.325084	0.859462	1.32617	1.32617	GM_StageIII up vs GM_StageV	0.96924	0.970197
OTU_196	6.06316e-07	9.09474e-06	1.0899e-06	2.54311e-05	6.9827	6.9827	GM_StageI up vs GM_StageII	1.19206e-05	0.000337454	5.06786	5.06786	GM_StageI up vs GM_StageIII	8.68201e-08	5.55648e-06	10.0965	10.0965	GM_StageI up vs GM_StageIV	7.40025e-07	4.71484e-05	8.32168	8.32168	GM_StageI up vs GM_StageV	0.260934	0.792117	0.725774	-1.37784	GM_StageII down vs GM_StageIII	0.198275	0.37693	1.44592	1.44592	GM_StageII up vs GM_StageIV	0.556952	0.473051	1.19176	1.19176	GM_StageII up vs GM_StageV	0.0221207	0.372831	1.99225	1.99225	GM_StageIII up vs GM_StageIV	0.1073	0.645741	1.64205	1.64205	GM_StageIII up vs GM_StageV	0.517864	0.956761
OTU_102	2.26012e-06	2.26012e-05	0.00325224	0.0063238	0.335221	-2.9831	GM_StageI down vs GM_StageII	2.1388e-05	0.000340014	0.162418	-6.15695	GM_StageI down vs GM_StageIII	6.14234e-07	1.58371e-05	0.0928578	-10.7692	GM_StageI down vs GM_StageIV	1.21662e-06	4.71484e-05	0.090589	-11.0389	GM_StageI down vs GM_StageV	0.037936	0.535513	0.48451	-2.06394	GM_StageII down vs GM_StageIII	0.000854527	0.0259919	0.277004	-3.61005	GM_StageII down vs GM_StageIV	0.0012153	0.0282566	0.270236	-3.70047	GM_StageII down vs GM_StageV	0.101433	0.553935	0.571721	-1.74911	GM_StageIII down vs GM_StageIV	0.106462	0.645741	0.557751	-1.79291	GM_StageIII down vs GM_StageV	0.943509	0.970197
OTU_1173	6.13466e-06	4.60099e-05	3.81116e-06	5.92847e-05	4.52183	4.52183	GM_StageI up vs GM_StageII	3.81116e-06	0.000181763	4.52183	4.52183	GM_StageI up vs GM_StageIII	3.81116e-06	4.87829e-05	4.52183	4.52183	GM_StageI up vs GM_StageIV	8.21041e-06	0.000186103	4.52183	4.52183	GM_StageI up vs GM_StageV	1	0.926784	1	1	No change between GM_StageII and GM_StageIII	1	0.732932	1	1	No change between GM_StageII and GM_StageIV	1	0.60241	1	1	No change between GM_StageII and GM_StageV	1	0.907158	1	1	No change between GM_StageIII and GM_StageIV	1	0.942594	1	1	No change between GM_StageIII and GM_StageV	1	0.970197
OTU_368	6.32803e-05	0.000343079	0.000244527	0.00126792	3.28309	3.28309	GM_StageI up vs GM_StageII	0.00013716	0.0013083	3.51244	3.51244	GM_StageI up vs GM_StageIII	0.367653	0.196082	1.276	1.276	GM_StageI up vs GM_StageIV	7.0996e-05	0.00128739	4.11581	4.11581	GM_StageI up vs GM_StageV	0.800949	0.926784	1.06986	1.06986	GM_StageII up vs GM_StageIII	0.00200489	0.0383871	0.388658	-2.57295	GM_StageII down vs GM_StageIV	0.429676	0.440339	1.25364	1.25364	GM_StageII up vs GM_StageV	0.00111942	0.168572	0.363281	-2.75269	GM_StageIII down vs GM_StageIV	0.57808	0.942594	1.17178	1.17178	GM_StageIII up vs GM_StageV	0.000507235	0.0816915
OTU_43	6.86159e-05	0.000343079	0.00251919	0.0061875	0.414338	-2.41349	GM_StageI down vs GM_StageII	0.000738943	0.00447778	0.361537	-2.76597	GM_StageI down vs GM_StageIII	2.60397e-06	4.16635e-05	0.188151	-5.31487	GM_StageI down vs GM_StageIV	0.00038351	0.00316105	0.314636	-3.17828	GM_StageI down vs GM_StageV	0.596773	0.9014	0.872565	-1.14605	GM_StageII down vs GM_StageIII	0.00568773	0.0768897	0.454101	-2.20215	GM_StageII down vs GM_StageIV	0.318518	0.434867	0.759371	-1.31688	GM_StageII down vs GM_StageV	0.0184299	0.372831	0.520421	-1.92152	GM_StageIII down vs GM_StageIV	0.611063	0.942594	0.870274	-1.14906	GM_StageIII down vs GM_StageV	0.070878	0.600794
OTU_7	0.000118471	0.0004659	0.00307781	0.00629558	0.552421	-1.81021	GM_StageI down vs GM_StageII	0.00331209	0.0126369	0.55557	-1.79995	GM_StageI down vs GM_StageIII	7.07547e-06	7.54716e-05	0.342915	-2.91617	GM_StageI down vs GM_StageIV	0.000147669	0.00183326	0.415892	-2.40447	GM_StageI down vs GM_StageV	0.974439	0.926784	1.0057	1.0057	GM_StageII up vs GM_StageIII	0.0134931	0.126281	0.62075	-1.61095	GM_StageII down vs GM_StageIV	0.142839	0.338825	0.752855	-1.32828	GM_StageII down vs GM_StageV	0.0125769	0.372831	0.617231	-1.62014	GM_StageIII down vs GM_StageIV	0.135446	0.683654	0.748587	-1.33585	GM_StageIII down vs GM_StageV	0.311876	0.896937
OTU_197	0.000131471	0.0004659	3.11515e-05	0.000290747	0.119504	-8.3679	GM_StageI down vs GM_StageII	3.80717e-05	0.000518779	0.123859	-8.07372	GM_StageI down vs GM_StageIII	0.000130756	0.000697364	0.153875	-6.49878	GM_StageI down vs GM_StageIV	0.000461899	0.0034899	0.173085	-5.77752	GM_StageI down vs GM_StageV	0.928159	0.926784	1.03644	1.03644	GM_StageII up vs GM_StageIII	0.526417	0.566791	1.28761	1.28761	GM_StageII up vs GM_StageIV	0.383764	0.434867	1.44835	1.44835	GM_StageII up vs GM_StageV	0.58605	0.842839	1.24234	1.24234	GM_StageIII up vs GM_StageIV	0.430524	0.92766	1.39744	1.39744	GM_StageIII up vs GM_StageV	0.780125	0.970197
OTU_227	0.00013977	0.0004659	5.36008e-05	0.000416895	4.04213	4.04213	GM_StageI up vs GM_StageII	1.62579e-05	0.000337454	4.68287	4.68287	GM_StageI up vs GM_StageIII	0.000450649	0.00169656	3.13271	3.13271	GM_StageI up vs GM_StageIV	0.000702341	0.00454849	3.17573	3.17573	GM_StageI up vs GM_StageV	0.591834	0.9014	1.15852	1.15852	GM_StageII up vs GM_StageIII	0.356676	0.502778	0.775016	-1.2903	GM_StageII down vs GM_StageIV	0.409715	0.440339	0.785659	-1.27282	GM_StageII down vs GM_StageV	0.152618	0.589295	0.668972	-1.49483	GM_StageIII down vs GM_StageIV	0.190624	0.745676	0.678159	-1.47458	GM_StageIII down vs GM_StageV	0.962483	0.970197
OTU_114	0.000171966	0.000515897	1.76383e-05	0.00020578	0.284406	-3.51611	GM_StageI down vs GM_StageII	8.11841e-05	0.000967964	0.331605	-3.01564	GM_StageI down vs GM_StageIII	0.00167094	0.00486091	0.445236	-2.246	GM_StageI down vs GM_StageIV	0.000520513	0.00363025	0.376026	-2.65939	GM_StageI down vs GM_StageV	0.495953	0.887652	1.16596	1.16596	GM_StageII up vs GM_StageIII	0.0569905	0.247637	1.5655	1.5655	GM_StageII up vs GM_StageIV	0.248556	0.420474	1.32215	1.32215	GM_StageII up vs GM_StageV	0.198543	0.649963	1.34267	1.34267	GM_StageIII up vs GM_StageIV	0.59826	0.942594	1.13396	1.13396	GM_StageIII up vs GM_StageV	0.480192	0.956761
OTU_28	0.000190085	0.000518414	0.00127974	0.00351302	0.284004	-3.52108	GM_StageI down vs GM_StageII	1.76891e-05	0.000337454	0.150323	-6.65233	GM_StageI down vs GM_StageIII	0.000130717	0.000697364	0.203287	-4.91916	GM_StageI down vs GM_StageIV	0.000380796	0.00316105	0.218075	-4.58558	GM_StageI down vs GM_StageV	0.0716023	0.734383	0.5293	-1.88929	GM_StageII down vs GM_StageIII	0.328528	0.48745	0.715788	-1.39706	GM_StageII down vs GM_StageIV	0.464243	0.459265	0.767859	-1.30232	GM_StageII down vs GM_StageV	0.376663	0.822044	1.35233	1.35233	GM_StageIII up vs GM_StageIV	0.30597	0.839918	1.45071	1.45071	GM_StageIII up vs GM_StageV	0.84471	0.970197
OTU_85	0.000285218	0.000713045	0.00078827	0.00262757	2.78443	2.78443	GM_StageI up vs GM_StageII	0.03736	0.0754658	1.77687	1.77687	GM_StageI up vs GM_StageIII	0.683196	0.297446	0.899037	-1.1123	GM_StageI down vs GM_StageIV	0.197685	0.202034	0.695162	-1.43851	GM_StageI down vs GM_StageV	0.0964069	0.787553	0.638145	-1.56704	GM_StageII down vs GM_StageIII	0.000306322	0.0186346	0.32288	-3.09712	GM_StageII down vs GM_StageIV	6.44147e-05	0.00644147	0.249661	-4.00544	GM_StageII down vs GM_StageV	0.0157035	0.372831	0.505967	-1.97641	GM_StageIII down vs GM_StageIV	0.00271148	0.141422	0.391229	-2.55605	GM_StageIII down vs GM_StageV	0.356937	0.902064
OTU_22	0.000335556	0.000774361	0.0561733	0.0485448	0.485175	-2.06111	GM_StageI down vs GM_StageII	0.00119684	0.00634225	0.258469	-3.86894	GM_StageI down vs GM_StageIII	0.000129677	0.000697364	0.182604	-5.47632	GM_StageI down vs GM_StageIV	9.66505e-05	0.0014605	0.156774	-6.37861	GM_StageI down vs GM_StageV	0.0926235	0.787553	0.532732	-1.87711	GM_StageII down vs GM_StageIII	0.0127919	0.126281	0.376368	-2.65697	GM_StageII down vs GM_StageIV	0.00744122	0.101518	0.323129	-3.09474	GM_StageII down vs GM_StageV	0.340814	0.813401	0.706486	-1.41546	GM_StageIII down vs GM_StageIV	0.200707	0.747732	0.606549	-1.64867	GM_StageIII down vs GM_StageV	0.690461	0.970197
OTU_259	0.000426676	0.0008895	0.00613325	0.00986959	0.32317	-3.09435	GM_StageI down vs GM_StageII	0.00135113	0.006566	0.25287	-3.9546	GM_StageI down vs GM_StageIII	3.77778e-05	0.000345397	0.141508	-7.06672	GM_StageI down vs GM_StageIV	0.217354	0.211901	0.608977	-1.6421	GM_StageI down vs GM_StageV	0.511328	0.887652	0.782468	-1.27801	GM_StageII down vs GM_StageIII	0.0362435	0.209982	0.437876	-2.28375	GM_StageII down vs GM_StageIV	0.119567	0.337775	1.88439	1.88439	GM_StageII up vs GM_StageV	0.12969	0.553935	0.559608	-1.78696	GM_StageIII down vs GM_StageIV	0.0356805	0.556737	2.40826	2.40826	GM_StageIII up vs GM_StageV	0.0013421	0.100198
OTU_61	0.00044475	0.0008895	0.00092236	0.00286956	5.66254	5.66254	GM_StageI up vs GM_StageII	0.000244255	0.00211801	7.32849	7.32849	GM_StageI up vs GM_StageIII	0.000125611	0.000697364	8.34751	8.34751	GM_StageI up vs GM_StageIV	0.000161758	0.00183326	9.00719	9.00719	GM_StageI up vs GM_StageV	0.566826	0.9014	1.29421	1.29421	GM_StageII up vs GM_StageIII	0.391367	0.512003	1.47416	1.47416	GM_StageII up vs GM_StageIV	0.335068	0.434867	1.59066	1.59066	GM_StageII up vs GM_StageV	0.771753	0.89673	1.13905	1.13905	GM_StageIII up vs GM_StageIV	0.665256	0.942594	1.22907	1.22907	GM_StageIII up vs GM_StageV	0.872958	0.970197
OTU_23	0.000537942	0.00100864	0.000641526	0.00249482	5.41369	5.41369	GM_StageI up vs GM_StageII	0.000128329	0.0013083	7.26049	7.26049	GM_StageI up vs GM_StageIII	0.000232262	0.00106177	6.51238	6.51238	GM_StageI up vs GM_StageIV	0.000350539	0.00316105	6.73821	6.73821	GM_StageI up vs GM_StageV	0.487136	0.887652	1.34114	1.34114	GM_StageII up vs GM_StageIII	0.660555	0.653394	1.20295	1.20295	GM_StageII up vs GM_StageIV	0.624059	0.491385	1.24466	1.24466	GM_StageII up vs GM_StageV	0.795724	0.89673	0.896961	-1.11488	GM_StageIII down vs GM_StageIV	0.866858	0.942594	0.928065	-1.07751	GM_StageIII down vs GM_StageV	0.938958	0.970197
OTU_3	0.000698304	0.0012323	0.0138027	0.0174089	1.89352	1.89352	GM_StageI up vs GM_StageII	0.95585	0.573418	1.01329	1.01329	GM_StageI up vs GM_StageIII	0.0264915	0.0314764	0.567704	-1.76148	GM_StageI down vs GM_StageIV	0.105039	0.158725	0.653847	-1.52941	GM_StageI down vs GM_StageV	0.0155753	0.306118	0.535135	-1.86869	GM_StageII down vs GM_StageIII	6.10629e-05	0.00742931	0.299814	-3.3354	GM_StageII down vs GM_StageIV	0.000423479	0.021174	0.345307	-2.89597	GM_StageII down vs GM_StageV	0.0235612	0.372831	0.560258	-1.78489	GM_StageIII down vs GM_StageIV	0.09537	0.645741	0.645271	-1.54974	GM_StageIII down vs GM_StageV	0.578048	0.963939
OTU_84	0.000914821	0.00146524	0.12334	0.0777817	0.55433	-1.80398	GM_StageI down vs GM_StageII	0.00322425	0.0126369	0.291535	-3.43012	GM_StageI down vs GM_StageIII	6.51333e-05	0.000521067	0.155336	-6.43764	GM_StageI down vs GM_StageIV	0.00770937	0.0241029	0.314693	-3.1777	GM_StageI down vs GM_StageV	0.0951495	0.787553	0.525924	-1.90141	GM_StageII down vs GM_StageIII	0.00252408	0.0383871	0.280224	-3.56858	GM_StageII down vs GM_StageIV	0.160937	0.338825	0.567701	-1.76149	GM_StageII down vs GM_StageV	0.101558	0.553935	0.532822	-1.8768	GM_StageIII down vs GM_StageIV	0.84595	0.942594	1.07943	1.07943	GM_StageIII up vs GM_StageV	0.0846755	0.663685
OTU_41	0.000927986	0.00146524	0.00357456	0.00667251	0.428053	-2.33616	GM_StageI down vs GM_StageII	0.00041221	0.00327654	0.33598	-2.97636	GM_StageI down vs GM_StageIII	0.000212529	0.0010463	0.311886	-3.2063	GM_StageI down vs GM_StageIV	0.172735	0.188691	0.681334	-1.46771	GM_StageI down vs GM_StageV	0.35477	0.792117	0.784903	-1.27404	GM_StageII down vs GM_StageIII	0.230085	0.409434	0.728614	-1.37247	GM_StageII down vs GM_StageIV	0.102378	0.332451	1.5917	1.5917	GM_StageII up vs GM_StageV	0.773875	0.89673	0.928286	-1.07725	GM_StageIII down vs GM_StageIV	0.0171946	0.53809	2.0279	2.0279	GM_StageIII up vs GM_StageV	0.00948001	0.308323
OTU_304	0.00114849	0.00172274	8.104e-05	0.000540266	0.200302	-4.99246	GM_StageI down vs GM_StageII	0.000751111	0.00447778	0.274897	-3.63773	GM_StageI down vs GM_StageIII	0.00263981	0.00675792	0.328347	-3.04555	GM_StageI down vs GM_StageIV	0.0122854	0.032761	0.388571	-2.57353	GM_StageI down vs GM_StageV	0.338102	0.792117	1.37241	1.37241	GM_StageII up vs GM_StageIII	0.14145	0.347686	1.63926	1.63926	GM_StageII up vs GM_StageIV	0.0674501	0.293209	1.93992	1.93992	GM_StageII up vs GM_StageV	0.587683	0.842839	1.19444	1.19444	GM_StageIII up vs GM_StageIV	0.323845	0.859462	1.41352	1.41352	GM_StageIII up vs GM_StageV	0.627755	0.970197
OTU_263	0.00222652	0.00313144	0.0590039	0.0489674	1.82133	1.82133	GM_StageI up vs GM_StageII	0.00293591	0.0126369	2.76747	2.76747	GM_StageI up vs GM_StageIII	0.000266061	0.0011352	3.79047	3.79047	GM_StageI up vs GM_StageIV	0.00173775	0.00926802	3.16706	3.16706	GM_StageI up vs GM_StageV	0.177167	0.787553	1.51948	1.51948	GM_StageII up vs GM_StageIII	0.0238783	0.170894	2.08115	2.08115	GM_StageII up vs GM_StageIV	0.09671	0.332451	1.73887	1.73887	GM_StageII up vs GM_StageV	0.305192	0.803487	1.36965	1.36965	GM_StageIII up vs GM_StageIV	0.6749	0.942594	1.14439	1.14439	GM_StageIII up vs GM_StageV	0.576993	0.963939
OTU_6	0.00229639	0.00313144	0.526291	0.195258	1.26577	1.26577	GM_StageI up vs GM_StageII	0.0100756	0.0274589	0.352313	-2.83838	GM_StageI down vs GM_StageIII	0.0094157	0.0154209	0.348361	-2.87058	GM_StageI down vs GM_StageIV	0.0109037	0.0299577	0.335368	-2.9818	GM_StageI down vs GM_StageV	0.00237886	0.182989	0.278339	-3.59275	GM_StageII down vs GM_StageIII	0.00221768	0.0383871	0.275216	-3.6335	GM_StageII down vs GM_StageIV	0.00280729	0.0467882	0.264951	-3.77428	GM_StageII down vs GM_StageV	0.975673	0.907158	0.988783	-1.01134	GM_StageIII down vs GM_StageIV	0.900046	0.942594	0.951903	-1.05053	GM_StageIII down vs GM_StageV	0.922832	0.970197
OTU_815	0.00246486	0.00316652	0.000398373	0.00173212	0.238249	-4.1973	GM_StageI down vs GM_StageII	0.00137674	0.006566	0.285746	-3.49961	GM_StageI down vs GM_StageIII	0.00421211	0.00898584	0.337017	-2.96721	GM_StageI down vs GM_StageIV	0.159844	0.181949	0.594979	-1.68073	GM_StageI down vs GM_StageV	0.593279	0.9014	1.19936	1.19936	GM_StageII up vs GM_StageIII	0.313022	0.470176	1.41456	1.41456	GM_StageII up vs GM_StageIV	0.0184082	0.153402	2.4973	2.4973	GM_StageII up vs GM_StageV	0.627545	0.85136	1.17943	1.17943	GM_StageIII up vs GM_StageIV	0.0527004	0.634313	2.0822	2.0822	GM_StageIII up vs GM_StageV	0.125784	0.666777
OTU_2351	0.00253322	0.00316652	0.000103365	0.000602965	4.84397	4.84397	GM_StageI up vs GM_StageII	0.0141588	0.0355404	2.39352	2.39352	GM_StageI up vs GM_StageIII	0.0152707	0.0222119	2.36653	2.36653	GM_StageI up vs GM_StageIV	0.00943699	0.027057	2.69011	2.69011	GM_StageI up vs GM_StageV	0.0418961	0.535513	0.494124	-2.02378	GM_StageII down vs GM_StageIII	0.0390337	0.209994	0.488551	-2.04687	GM_StageII down vs GM_StageIV	0.102406	0.332451	0.555352	-1.80066	GM_StageII down vs GM_StageV	0.972363	0.907158	0.988721	-1.01141	GM_StageIII down vs GM_StageIV	0.736964	0.942594	1.12391	1.12391	GM_StageIII up vs GM_StageV	0.712592	0.970197
OTU_25	0.00283059	0.00339671	0.0629824	0.0506755	0.447181	-2.23623	GM_StageI down vs GM_StageII	0.00620158	0.0203978	0.285373	-3.50419	GM_StageI down vs GM_StageIII	0.0136001	0.020724	0.330141	-3.02901	GM_StageI down vs GM_StageIV	0.308829	0.274514	1.57139	1.57139	GM_StageI up vs GM_StageV	0.284112	0.792117	0.638159	-1.56701	GM_StageII down vs GM_StageIII	0.465588	0.549967	0.738271	-1.35452	GM_StageII down vs GM_StageIV	0.00902444	0.101518	3.51398	3.51398	GM_StageII up vs GM_StageV	0.724578	0.89673	1.15688	1.15688	GM_StageIII up vs GM_StageIV	0.00086492	0.0676673	5.50643	5.50643	GM_StageIII up vs GM_StageV	0.00186643	0.100198
OTU_9	0.00310643	0.00351406	0.0100649	0.0138146	1.74649	1.74649	GM_StageI up vs GM_StageII	0.000646662	0.00447778	2.21424	2.21424	GM_StageI up vs GM_StageIII	0.000679813	0.00241711	2.20481	2.20481	GM_StageI up vs GM_StageIV	0.00237279	0.0113228	2.06505	2.06505	GM_StageI up vs GM_StageV	0.238773	0.787553	1.26783	1.26783	GM_StageII up vs GM_StageIII	0.247024	0.418035	1.26242	1.26242	GM_StageII up vs GM_StageIV	0.428171	0.440339	1.1824	1.1824	GM_StageII up vs GM_StageV	0.982763	0.907158	0.995738	-1.00428	GM_StageIII down vs GM_StageIV	0.739752	0.942594	0.932622	-1.07225	GM_StageIII down vs GM_StageV	0.755119	0.970197
OTU_103	0.00316266	0.00351406	0.000408285	0.00173212	0.4407	-2.26911	GM_StageI down vs GM_StageII	0.00191209	0.00868495	0.501715	-1.99316	GM_StageI down vs GM_StageIII	0.0030875	0.00751314	0.522439	-1.9141	GM_StageI down vs GM_StageIV	0.0954401	0.151811	0.700025	-1.42852	GM_StageI down vs GM_StageV	0.506792	0.887652	1.13845	1.13845	GM_StageII up vs GM_StageIII	0.385722	0.510104	1.18547	1.18547	GM_StageII up vs GM_StageIV	0.0345646	0.216029	1.58844	1.58844	GM_StageII up vs GM_StageV	0.834967	0.907158	1.04131	1.04131	GM_StageIII up vs GM_StageIV	0.117727	0.67625	1.39526	1.39526	GM_StageIII up vs GM_StageV	0.16626	0.686581
OTU_75	0.0042047	0.00447998	0.0178831	0.0213986	0.357776	-2.79505	GM_StageI down vs GM_StageII	0.000720071	0.00447778	0.202526	-4.93764	GM_StageI down vs GM_StageIII	0.0009601	0.00307232	0.212897	-4.69711	GM_StageI down vs GM_StageIV	0.00417474	0.0151404	0.254456	-3.92995	GM_StageI down vs GM_StageV	0.167529	0.787553	0.566069	-1.76657	GM_StageII down vs GM_StageIII	0.20611	0.37995	0.595057	-1.68051	GM_StageII down vs GM_StageIV	0.427825	0.440339	0.711216	-1.40604	GM_StageII down vs GM_StageV	0.901098	0.907158	1.05121	1.05121	GM_StageIII up vs GM_StageIV	0.593628	0.942594	1.25641	1.25641	GM_StageIII up vs GM_StageV	0.676339	0.970197
OTU_32	0.00433065	0.00447998	0.0766439	0.0552983	0.544257	-1.83737	GM_StageI down vs GM_StageII	0.789327	0.521592	1.09204	1.09204	GM_StageI up vs GM_StageIII	0.0868501	0.0703596	0.556173	-1.798	GM_StageI down vs GM_StageIV	0.00109711	0.0066314	0.265977	-3.75972	GM_StageI down vs GM_StageV	0.0452509	0.535513	2.00648	2.00648	GM_StageII up vs GM_StageIII	0.947549	0.732932	1.0219	1.0219	GM_StageII up vs GM_StageIV	0.0515434	0.245445	0.488698	-2.04625	GM_StageII down vs GM_StageV	0.0516496	0.432467	0.509298	-1.96349	GM_StageIII down vs GM_StageIV	0.000612111	0.0676673	0.24356	-4.10576	GM_StageIII down vs GM_StageV	0.0455016	0.584842
OTU_79	0.00449886	0.00449886	0.002983	0.00629558	2.7667	2.7667	GM_StageI up vs GM_StageII	0.73316	0.503109	0.901713	-1.109	GM_StageI down vs GM_StageIII	0.316524	0.177698	1.36019	1.36019	GM_StageI up vs GM_StageIV	0.464163	0.36791	0.78903	-1.26738	GM_StageI down vs GM_StageV	0.00135861	0.182989	0.325917	-3.06827	GM_StageII down vs GM_StageIII	0.028266	0.181002	0.491628	-2.03406	GM_StageII down vs GM_StageIV	0.000847947	0.0282566	0.285188	-3.50646	GM_StageII down vs GM_StageV	0.185218	0.649963	1.50845	1.50845	GM_StageIII up vs GM_StageIV	0.678561	0.942594	0.875034	-1.14281	GM_StageIII down vs GM_StageV	0.102241	0.664732
OTU_48	0.00513262	0.00496705	0.0090759	0.0128346	0.293127	-3.41149	GM_StageI down vs GM_StageII	0.0598788	0.0984745	0.429444	-2.32859	GM_StageI down vs GM_StageIII	0.000297222	0.00118889	0.154889	-6.45623	GM_StageI down vs GM_StageIV	0.124285	0.166355	0.4865	-2.0555	GM_StageI down vs GM_StageV	0.377281	0.818789	1.46504	1.46504	GM_StageII up vs GM_StageIII	0.14746	0.347686	0.528403	-1.89249	GM_StageII down vs GM_StageIV	0.272216	0.420474	1.65969	1.65969	GM_StageII up vs GM_StageV	0.0260239	0.372831	0.360674	-2.77259	GM_StageIII down vs GM_StageIV	0.783691	0.942594	1.13286	1.13286	GM_StageIII up vs GM_StageV	0.0193706	0.445669
OTU_45	0.0060115	0.00563578	0.0249712	0.0284225	2.73771	2.73771	GM_StageI up vs GM_StageII	0.00109115	0.00612227	4.90887	4.90887	GM_StageI up vs GM_StageIII	0.00204063	0.00567828	4.38154	4.38154	GM_StageI up vs GM_StageIV	0.0028373	0.0128624	4.49637	4.49637	GM_StageI up vs GM_StageV	0.174347	0.787553	1.79306	1.79306	GM_StageII up vs GM_StageIII	0.269853	0.443677	1.60044	1.60044	GM_StageII up vs GM_StageIV	0.272331	0.420474	1.64239	1.64239	GM_StageII up vs GM_StageV	0.786547	0.89673	0.892576	-1.12035	GM_StageIII down vs GM_StageIV	0.843607	0.942594	0.915968	-1.09174	GM_StageIII down vs GM_StageV	0.95361	0.970197
OTU_26	0.00733502	0.0066682	0.00432599	0.00776459	0.275627	-3.62809	GM_StageI down vs GM_StageII	0.00709599	0.0225616	0.301051	-3.3217	GM_StageI down vs GM_StageIII	0.000811143	0.00273227	0.205584	-4.86418	GM_StageI down vs GM_StageIV	0.118183	0.164851	0.501185	-1.99527	GM_StageI down vs GM_StageV	0.826911	0.926784	1.09224	1.09224	GM_StageII up vs GM_StageIII	0.470278	0.550164	0.745878	-1.3407	GM_StageII down vs GM_StageIV	0.172801	0.338825	1.81834	1.81834	GM_StageII up vs GM_StageV	0.349875	0.813401	0.68289	-1.46436	GM_StageIII down vs GM_StageIV	0.242045	0.839918	1.66479	1.66479	GM_StageIII up vs GM_StageV	0.0482349	0.584842
OTU_30	0.00879171	0.00775739	0.378559	0.150992	0.794006	-1.25944	GM_StageI down vs GM_StageII	0.610468	0.462375	1.14169	1.14169	GM_StageI up vs GM_StageIII	0.0525979	0.0534328	1.69708	1.69708	GM_StageI up vs GM_StageIV	0.00954954	0.027057	2.18594	2.18594	GM_StageI up vs GM_StageV	0.171938	0.787553	1.43789	1.43789	GM_StageII up vs GM_StageIII	0.00788506	0.0959349	2.13737	2.13737	GM_StageII up vs GM_StageIV	0.00141283	0.0282566	2.75306	2.75306	GM_StageII up vs GM_StageV	0.137783	0.553935	1.48646	1.48646	GM_StageIII up vs GM_StageIV	0.0271626	0.556737	1.91465	1.91465	GM_StageIII up vs GM_StageV	0.362605	0.902064
OTU_159	0.00934185	0.00781786	0.682353	0.227551	1.16609	1.16609	GM_StageI up vs GM_StageII	0.033847	0.0704765	0.429337	-2.32917	GM_StageI down vs GM_StageIII	0.00601522	0.0114942	0.318932	-3.13546	GM_StageI down vs GM_StageIV	0.0800747	0.132002	0.484282	-2.06491	GM_StageI down vs GM_StageV	0.0141122	0.306118	0.368185	-2.71603	GM_StageII down vs GM_StageIII	0.00235996	0.0383871	0.273505	-3.65624	GM_StageII down vs GM_StageIV	0.0371763	0.218684	0.415304	-2.40788	GM_StageII down vs GM_StageV	0.431324	0.833065	0.742848	-1.34617	GM_StageIII down vs GM_StageIV	0.762113	0.942594	1.12798	1.12798	GM_StageIII up vs GM_StageV	0.300161	0.893959
OTU_956	0.00938143	0.00781786	0.00458315	0.00792149	4.27913	4.27913	GM_StageI up vs GM_StageII	0.00326244	0.0126369	4.58172	4.58172	GM_StageI up vs GM_StageIII	0.00253205	0.00675213	4.81986	4.81986	GM_StageI up vs GM_StageIV	0.00356957	0.014711	4.92965	4.92965	GM_StageI up vs GM_StageV	0.881579	0.926784	1.07071	1.07071	GM_StageII up vs GM_StageIII	0.79541	0.686347	1.12636	1.12636	GM_StageII up vs GM_StageIV	0.771307	0.5348	1.15202	1.15202	GM_StageII up vs GM_StageV	0.912015	0.907158	1.05198	1.05198	GM_StageIII up vs GM_StageIV	0.880401	0.942594	1.07594	1.07594	GM_StageIII up vs GM_StageV	0.963062	0.970197
OTU_70	0.0102125	0.00815606	0.274708	0.126928	0.689395	-1.45055	GM_StageI down vs GM_StageII	0.144962	0.181936	0.604913	-1.65313	GM_StageI down vs GM_StageIII	0.00610627	0.0114942	0.360625	-2.77296	GM_StageI down vs GM_StageIV	0.00158808	0.00899915	0.274994	-3.63644	GM_StageI down vs GM_StageV	0.697007	0.9014	0.877455	-1.13966	GM_StageII down vs GM_StageIII	0.0648961	0.26319	0.523104	-1.91167	GM_StageII down vs GM_StageIV	0.0168395	0.153086	0.398892	-2.50695	GM_StageII down vs GM_StageV	0.134288	0.553935	0.59616	-1.6774	GM_StageIII down vs GM_StageIV	0.0366741	0.556737	0.454601	-2.19973	GM_StageIII down vs GM_StageV	0.449099	0.956761
OTU_4	0.010578	0.00815606	0.16465	0.0903959	0.803525	-1.24452	GM_StageI down vs GM_StageII	0.739528	0.503855	0.950221	-1.05239	GM_StageI down vs GM_StageIII	0.0188193	0.0248391	1.47503	1.47503	GM_StageI up vs GM_StageIV	0.710936	0.463728	0.941398	-1.06225	GM_StageI down vs GM_StageV	0.281701	0.792117	1.18257	1.18257	GM_StageII up vs GM_StageIII	0.000742902	0.0259919	1.83569	1.83569	GM_StageII up vs GM_StageIV	0.336286	0.434867	1.17158	1.17158	GM_StageII up vs GM_StageV	0.00906768	0.372831	1.5523	1.5523	GM_StageIII up vs GM_StageIV	0.954264	0.942594	0.990715	-1.00937	GM_StageIII down vs GM_StageV	0.0114865	0.308323
OTU_74	0.0106029	0.00815606	0.000778647	0.00262757	3.62955	3.62955	GM_StageI up vs GM_StageII	0.402475	0.355929	1.31847	1.31847	GM_StageI up vs GM_StageIII	0.152299	0.101632	1.61844	1.61844	GM_StageI up vs GM_StageIV	0.109701	0.162187	1.77648	1.77648	GM_StageI up vs GM_StageV	0.00543293	0.237088	0.363259	-2.75286	GM_StageII down vs GM_StageIII	0.0216653	0.164747	0.445906	-2.24263	GM_StageII down vs GM_StageIV	0.0506506	0.245445	0.489448	-2.04312	GM_StageII down vs GM_StageV	0.533034	0.842839	1.22751	1.22751	GM_StageIII up vs GM_StageIV	0.394775	0.920905	1.34738	1.34738	GM_StageIII up vs GM_StageV	0.788491	0.970197
OTU_93	0.0114704	0.00860276	0.00101751	0.00296773	0.476992	-2.09647	GM_StageI down vs GM_StageII	0.00900788	0.025271	0.573777	-1.74284	GM_StageI down vs GM_StageIII	0.00699306	0.0127873	0.561351	-1.78142	GM_StageI down vs GM_StageIV	0.013166	0.0341062	0.574657	-1.74017	GM_StageI down vs GM_StageV	0.345566	0.792117	1.20291	1.20291	GM_StageII up vs GM_StageIII	0.404489	0.520722	1.17685	1.17685	GM_StageII up vs GM_StageIV	0.369357	0.434867	1.20475	1.20475	GM_StageII up vs GM_StageV	0.909935	0.907158	0.978343	-1.02214	GM_StageIII down vs GM_StageIV	0.994041	0.942594	1.00153	1.00153	GM_StageIII up vs GM_StageV	0.909144	0.970197
OTU_486	0.0159523	0.0116724	0.0675704	0.0521993	2.5128	2.5128	GM_StageI up vs GM_StageII	0.00434313	0.0153433	4.6572	4.6572	GM_StageI up vs GM_StageIII	0.00339181	0.0077527	4.90672	4.90672	GM_StageI up vs GM_StageIV	0.00729319	0.023616	4.54766	4.54766	GM_StageI up vs GM_StageV	0.209795	0.787553	1.85339	1.85339	GM_StageII up vs GM_StageIII	0.175318	0.37693	1.95269	1.95269	GM_StageII up vs GM_StageIV	0.253873	0.420474	1.8098	1.8098	GM_StageII up vs GM_StageV	0.913722	0.907158	1.05358	1.05358	GM_StageIII up vs GM_StageIV	0.962838	0.942594	0.976479	-1.02409	GM_StageIII down vs GM_StageV	0.881778	0.970197
OTU_68	0.0187111	0.0133651	0.00302969	0.00629558	2.39691	2.39691	GM_StageI up vs GM_StageII	0.0339878	0.0704765	1.80058	1.80058	GM_StageI up vs GM_StageIII	0.00352587	0.00778124	2.35583	2.35583	GM_StageI up vs GM_StageIV	0.0184852	0.045297	2.02065	2.02065	GM_StageI up vs GM_StageV	0.280256	0.792117	0.751211	-1.33118	GM_StageII down vs GM_StageIII	0.947162	0.732932	0.982864	-1.01743	GM_StageII down vs GM_StageIV	0.539092	0.473051	0.843023	-1.18621	GM_StageII down vs GM_StageV	0.309468	0.803487	1.30837	1.30837	GM_StageIII up vs GM_StageIV	0.677499	0.942594	1.12222	1.12222	GM_StageIII up vs GM_StageV	0.580568	0.963939
OTU_512	0.0211165	0.0147324	0.0110846	0.0147794	1.6896	1.6896	GM_StageI up vs GM_StageII	0.0120244	0.0318596	1.67787	1.67787	GM_StageI up vs GM_StageIII	0.00601166	0.0114942	1.77925	1.77925	GM_StageI up vs GM_StageIV	0.00407954	0.0151404	1.90672	1.90672	GM_StageI up vs GM_StageV	0.970574	0.926784	0.993057	-1.00699	GM_StageII down vs GM_StageIII	0.784476	0.683385	1.05306	1.05306	GM_StageII up vs GM_StageIV	0.54812	0.473051	1.12851	1.12851	GM_StageII up vs GM_StageV	0.756368	0.89673	1.06043	1.06043	GM_StageIII up vs GM_StageIV	0.52554	0.942594	1.1364	1.1364	GM_StageIII up vs GM_StageV	0.730212	0.970197
OTU_36	0.0218234	0.0148796	0.0693505	0.0521993	1.35847	1.35847	GM_StageI up vs GM_StageII	0.0638397	0.103209	1.36782	1.36782	GM_StageI up vs GM_StageIII	0.00129262	0.0039394	1.82244	1.82244	GM_StageI up vs GM_StageIV	0.0263193	0.0611867	1.50175	1.50175	GM_StageI up vs GM_StageV	0.966066	0.926784	1.00688	1.00688	GM_StageII up vs GM_StageIII	0.0805165	0.288123	1.34154	1.34154	GM_StageII up vs GM_StageIV	0.559517	0.473051	1.10547	1.10547	GM_StageII up vs GM_StageV	0.0872724	0.553935	1.33237	1.33237	GM_StageIII up vs GM_StageIV	0.586469	0.942594	1.09792	1.09792	GM_StageIII up vs GM_StageV	0.265814	0.851339
OTU_281	0.0246284	0.0164189	0.0499836	0.0452108	2.41795	2.41795	GM_StageI up vs GM_StageII	0.00365862	0.0134221	4.04443	4.04443	GM_StageI up vs GM_StageIII	0.00839294	0.0141355	3.45695	3.45695	GM_StageI up vs GM_StageIV	0.28375	0.254719	1.63809	1.63809	GM_StageI up vs GM_StageV	0.237551	0.787553	1.67267	1.67267	GM_StageII up vs GM_StageIII	0.407281	0.520722	1.42971	1.42971	GM_StageII up vs GM_StageIV	0.39497	0.434867	0.67747	-1.47608	GM_StageII down vs GM_StageV	0.713937	0.89673	0.854744	-1.16994	GM_StageIII down vs GM_StageIV	0.0576914	0.644786	0.405023	-2.46899	GM_StageIII down vs GM_StageV	0.11144	0.664732
OTU_413	0.0292431	0.0190352	0.00769913	0.0115901	1.59123	1.59123	GM_StageI up vs GM_StageII	0.00769913	0.0236896	1.59123	1.59123	GM_StageI up vs GM_StageIII	0.00769913	0.0133174	1.59123	1.59123	GM_StageI up vs GM_StageIV	0.113757	0.162709	1.31538	1.31538	GM_StageI up vs GM_StageV	1	0.926784	1	1	No change between GM_StageII and GM_StageIII	1	0.732932	1	1	No change between GM_StageII and GM_StageIV	0.263838	0.420474	0.826643	-1.20971	GM_StageII down vs GM_StageV	1	0.907158	1	1	No change between GM_StageIII and GM_StageIV	0.263838	0.839918	0.826643	-1.20971	GM_StageIII down vs GM_StageV	0.263838	0.851339
OTU_65	0.0298218	0.0190352	0.00225324	0.00584173	0.446222	-2.24104	GM_StageI down vs GM_StageII	0.0183741	0.0427466	0.554244	-1.80426	GM_StageI down vs GM_StageIII	0.104616	0.0816513	0.677096	-1.47689	GM_StageI down vs GM_StageIV	0.114854	0.162709	0.669634	-1.49335	GM_StageI down vs GM_StageV	0.355265	0.792117	1.24208	1.24208	GM_StageII up vs GM_StageIII	0.0841421	0.292494	1.5174	1.5174	GM_StageII up vs GM_StageIV	0.110775	0.333505	1.50067	1.50067	GM_StageII up vs GM_StageV	0.392467	0.822903	1.22166	1.22166	GM_StageIII up vs GM_StageIV	0.445374	0.92766	1.20819	1.20819	GM_StageIII up vs GM_StageV	0.964049	0.970197
OTU_161	0.0309671	0.0193544	0.142765	0.0822513	0.588546	-1.6991	GM_StageI down vs GM_StageII	0.135824	0.177774	0.582717	-1.7161	GM_StageI down vs GM_StageIII	0.00316961	0.00751314	0.31017	-3.22404	GM_StageI down vs GM_StageIV	0.70718	0.463728	0.869151	-1.15055	GM_StageI down vs GM_StageV	0.977396	0.926784	0.990095	-1.01	GM_StageII down vs GM_StageIII	0.0803176	0.288123	0.527011	-1.89749	GM_StageII down vs GM_StageIV	0.302378	0.434867	1.47678	1.47678	GM_StageII up vs GM_StageV	0.0847544	0.553935	0.532283	-1.8787	GM_StageIII down vs GM_StageIV	0.290551	0.839918	1.49155	1.49155	GM_StageIII up vs GM_StageV	0.0113766	0.308323
OTU_177	0.0338325	0.0207138	0.788761	0.247436	0.908134	-1.10116	GM_StageI down vs GM_StageII	0.313718	0.308956	1.4434	1.4434	GM_StageI up vs GM_StageIII	0.0265582	0.0314764	0.426268	-2.34594	GM_StageI down vs GM_StageIV	0.332993	0.290302	0.688209	-1.45305	GM_StageI down vs GM_StageV	0.206941	0.787553	1.58941	1.58941	GM_StageII up vs GM_StageIII	0.0462112	0.224894	0.469389	-2.13043	GM_StageII down vs GM_StageIV	0.469993	0.459265	0.757827	-1.31956	GM_StageII down vs GM_StageV	0.00274858	0.206952	0.295323	-3.38612	GM_StageIII down vs GM_StageIV	0.0637005	0.645741	0.476798	-2.09732	GM_StageIII down vs GM_StageV	0.218193	0.771316
OTU_58	0.036689	0.0214323	0.0307519	0.0309681	0.424616	-2.35507	GM_StageI down vs GM_StageII	0.0312715	0.0677914	0.425886	-2.34805	GM_StageI down vs GM_StageIII	0.00760002	0.0133174	0.334246	-2.9918	GM_StageI down vs GM_StageIV	0.00622749	0.0209121	0.302008	-3.31117	GM_StageI down vs GM_StageV	0.993591	0.926784	1.00299	1.00299	GM_StageII up vs GM_StageIII	0.522234	0.566791	0.787174	-1.27037	GM_StageII down vs GM_StageIV	0.392397	0.434867	0.711251	-1.40597	GM_StageII down vs GM_StageV	0.517111	0.838473	0.784826	-1.27417	GM_StageIII down vs GM_StageIV	0.388341	0.920905	0.709129	-1.41018	GM_StageIII down vs GM_StageV	0.797267	0.970197
OTU_13	0.0369546	0.0214323	0.0533432	0.0469688	0.506229	-1.97539	GM_StageI down vs GM_StageII	0.0683289	0.108625	0.528025	-1.89385	GM_StageI down vs GM_StageIII	0.0826233	0.0677934	0.545817	-1.83212	GM_StageI down vs GM_StageIV	0.00221199	0.0111419	0.28968	-3.45209	GM_StageI down vs GM_StageV	0.899827	0.926784	1.04306	1.04306	GM_StageII up vs GM_StageIII	0.822185	0.698888	1.0782	1.0782	GM_StageII up vs GM_StageIV	0.127728	0.337775	0.572231	-1.74754	GM_StageII down vs GM_StageV	0.921164	0.907158	1.0337	1.0337	GM_StageIII up vs GM_StageIV	0.102988	0.645741	0.54861	-1.82279	GM_StageIII down vs GM_StageV	0.0865394	0.663685
OTU_16	0.0371494	0.0214323	0.141061	0.0822513	0.659221	-1.51694	GM_StageI down vs GM_StageII	0.00511141	0.0174125	0.423839	-2.35939	GM_StageI down vs GM_StageIII	0.00963806	0.0154209	0.458052	-2.18316	GM_StageI down vs GM_StageIV	0.145438	0.181949	0.646047	-1.54787	GM_StageI down vs GM_StageV	0.119988	0.787553	0.642939	-1.55536	GM_StageII down vs GM_StageIII	0.195444	0.37693	0.694838	-1.43919	GM_StageII down vs GM_StageIV	0.944808	0.60241	0.980015	-1.02039	GM_StageII down vs GM_StageV	0.777881	0.89673	1.08072	1.08072	GM_StageIII up vs GM_StageIV	0.159335	0.71232	1.52428	1.52428	GM_StageIII up vs GM_StageV	0.246786	0.828032
OTU_225	0.0404818	0.0229142	0.0200949	0.023444	0.473778	-2.11069	GM_StageI down vs GM_StageII	0.320264	0.308956	0.740459	-1.35051	GM_StageI down vs GM_StageIII	0.0635407	0.0591317	0.559828	-1.78626	GM_StageI down vs GM_StageIV	0.615958	0.425009	1.17263	1.17263	GM_StageI up vs GM_StageV	0.145817	0.787553	1.56288	1.56288	GM_StageII up vs GM_StageIII	0.577458	0.595402	1.18162	1.18162	GM_StageII up vs GM_StageIV	0.00913658	0.101518	2.47505	2.47505	GM_StageII up vs GM_StageV	0.354136	0.813401	0.756054	-1.32266	GM_StageIII down vs GM_StageIV	0.157343	0.71232	1.58365	1.58365	GM_StageIII up vs GM_StageV	0.0286651	0.461658
OTU_406	0.042934	0.0238522	0.0770227	0.0552983	2.17257	2.17257	GM_StageI up vs GM_StageII	0.0306151	0.0677914	2.63626	2.63626	GM_StageI up vs GM_StageIII	0.0786579	0.0662382	2.16255	2.16255	GM_StageI up vs GM_StageIV	0.00312217	0.0134798	4.43317	4.43317	GM_StageI up vs GM_StageV	0.64641	0.9014	1.21343	1.21343	GM_StageII up vs GM_StageIII	0.99123	0.732932	0.995389	-1.00463	GM_StageII down vs GM_StageIV	0.121652	0.337775	2.04052	2.04052	GM_StageII up vs GM_StageV	0.638604	0.853951	0.820309	-1.21905	GM_StageIII down vs GM_StageIV	0.252258	0.839918	1.68161	1.68161	GM_StageIII up vs GM_StageV	0.119403	0.666777
OTU_90	0.0438265	0.0239054	0.00310282	0.00629558	3.89481	3.89481	GM_StageI up vs GM_StageII	0.0475123	0.0892221	2.34163	2.34163	GM_StageI up vs GM_StageIII	0.149917	0.101632	1.82681	1.82681	GM_StageI up vs GM_StageIV	0.0580672	0.107596	2.36092	2.36092	GM_StageI up vs GM_StageV	0.220469	0.787553	0.601219	-1.66329	GM_StageII down vs GM_StageIII	0.0747846	0.284337	0.469038	-2.13202	GM_StageII down vs GM_StageIV	0.254404	0.420474	0.606171	-1.6497	GM_StageII down vs GM_StageV	0.543751	0.842839	0.780145	-1.28181	GM_StageIII down vs GM_StageIV	0.984837	0.942594	1.00824	1.00824	GM_StageIII up vs GM_StageV	0.554193	0.963939
OTU_56	0.0476835	0.0255447	0.00725973	0.0112929	2.4603	2.4603	GM_StageI up vs GM_StageII	0.00872744	0.025271	2.39963	2.39963	GM_StageI up vs GM_StageIII	0.0642572	0.0591317	1.80098	1.80098	GM_StageI up vs GM_StageIV	0.0593358	0.107596	1.89096	1.89096	GM_StageI up vs GM_StageV	0.934423	0.926784	0.97534	-1.02528	GM_StageII down vs GM_StageIII	0.310624	0.470176	0.732015	-1.36609	GM_StageII down vs GM_StageIV	0.417607	0.440339	0.768592	-1.30108	GM_StageII down vs GM_StageV	0.349936	0.813401	0.750523	-1.3324	GM_StageIII down vs GM_StageIV	0.462435	0.92766	0.788024	-1.269	GM_StageIII down vs GM_StageV	0.879618	0.970197
OTU_10	0.0492409	0.0257933	0.0164718	0.0202286	2.06206	2.06206	GM_StageI up vs GM_StageII	0.00879787	0.025271	2.2325	2.2325	GM_StageI up vs GM_StageIII	0.0437956	0.0459495	1.81145	1.81145	GM_StageI up vs GM_StageIV	0.0144936	0.0365025	2.19238	2.19238	GM_StageI up vs GM_StageV	0.775959	0.918295	1.08266	1.08266	GM_StageII up vs GM_StageIII	0.643003	0.641246	0.878467	-1.13835	GM_StageII down vs GM_StageIV	0.8359	0.561007	1.0632	1.0632	GM_StageII up vs GM_StageV	0.456774	0.833065	0.8114	-1.23244	GM_StageIII down vs GM_StageIV	0.951087	0.942594	0.982026	-1.0183	GM_StageIII down vs GM_StageV	0.520907	0.956761
OTU_71	0.0506277	0.0257933	0.257236	0.125045	0.675766	-1.4798	GM_StageI down vs GM_StageII	0.15566	0.191553	1.64226	1.64226	GM_StageI up vs GM_StageIII	0.637681	0.283321	1.1742	1.1742	GM_StageI up vs GM_StageIV	0.148897	0.181949	0.585426	-1.70816	GM_StageI down vs GM_StageV	0.0159181	0.306118	2.43022	2.43022	GM_StageII up vs GM_StageIII	0.11607	0.347686	1.73758	1.73758	GM_StageII up vs GM_StageIV	0.691268	0.51975	0.866315	-1.15431	GM_StageII down vs GM_StageV	0.329923	0.813401	0.714987	-1.39863	GM_StageIII down vs GM_StageIV	0.00921015	0.360279	0.356476	-2.80524	GM_StageIII down vs GM_StageV	0.0653647	0.584842
OTU_51	0.0507268	0.0257933	0.342772	0.141315	0.638395	-1.56643	GM_StageI down vs GM_StageII	0.0486404	0.0892221	2.64274	2.64274	GM_StageI up vs GM_StageIII	0.173452	0.113275	1.92003	1.92003	GM_StageI up vs GM_StageIV	0.57271	0.415406	1.3242	1.3242	GM_StageI up vs GM_StageV	0.00616428	0.237088	4.13966	4.13966	GM_StageII up vs GM_StageIII	0.0275211	0.181002	3.00758	3.00758	GM_StageII up vs GM_StageIV	0.152286	0.338825	2.07426	2.07426	GM_StageII up vs GM_StageV	0.496913	0.838473	0.726528	-1.37641	GM_StageIII down vs GM_StageIV	0.173985	0.727247	0.50107	-1.99573	GM_StageIII down vs GM_StageV	0.456915	0.956761
OTU_120	0.0542891	0.0266855	0.146131	0.0830273	0.684348	-1.46125	GM_StageI down vs GM_StageII	0.0597031	0.0984745	0.605789	-1.65074	GM_StageI down vs GM_StageIII	0.182788	0.115826	0.707456	-1.41352	GM_StageI down vs GM_StageIV	0.00383826	0.0151305	0.417363	-2.39599	GM_StageI down vs GM_StageV	0.631711	0.9014	0.885207	-1.12968	GM_StageII down vs GM_StageIII	0.89584	0.732932	1.03377	1.03377	GM_StageII up vs GM_StageIV	0.0780329	0.300127	0.60987	-1.63969	GM_StageII down vs GM_StageV	0.542719	0.842839	1.16782	1.16782	GM_StageIII up vs GM_StageIV	0.176617	0.727247	0.688958	-1.45147	GM_StageIII down vs GM_StageV	0.0614336	0.584842
OTU_73	0.0543248	0.0266855	0.268408	0.126928	0.630046	-1.58719	GM_StageI down vs GM_StageII	0.156641	0.191553	0.550142	-1.81771	GM_StageI down vs GM_StageIII	0.0046091	0.00951556	0.272346	-3.67179	GM_StageI down vs GM_StageIV	0.0548707	0.107596	0.415104	-2.40904	GM_StageI down vs GM_StageV	0.741518	0.9014	0.873177	-1.14524	GM_StageII down vs GM_StageIII	0.0523307	0.244881	0.432264	-2.3134	GM_StageII down vs GM_StageIV	0.343794	0.434867	0.658847	-1.5178	GM_StageII down vs GM_StageV	0.0988901	0.553935	0.495048	-2.02001	GM_StageIII down vs GM_StageIV	0.520101	0.942594	0.754539	-1.32531	GM_StageIII down vs GM_StageV	0.339087	0.902064
OTU_94	0.0551499	0.0266855	0.269632	0.126928	0.555358	-1.80064	GM_StageI down vs GM_StageII	0.452376	0.381856	0.672448	-1.4871	GM_StageI down vs GM_StageIII	0.0655992	0.0591317	0.364003	-2.74723	GM_StageI down vs GM_StageIV	0.00577048	0.0201227	0.181604	-5.50648	GM_StageI down vs GM_StageV	0.715563	0.9014	1.21084	1.21084	GM_StageII up vs GM_StageIII	0.424189	0.532058	0.655439	-1.5257	GM_StageII down vs GM_StageIV	0.0557704	0.253502	0.327004	-3.05807	GM_StageII down vs GM_StageV	0.249996	0.71875	0.541311	-1.84737	GM_StageIII down vs GM_StageIV	0.0275827	0.556737	0.270064	-3.70282	GM_StageIII down vs GM_StageV	0.220304	0.771316
OTU_53	0.0570919	0.026894	0.14767	0.0830273	0.694196	-1.44052	GM_StageI down vs GM_StageII	1	0.574606	1	1	No change between GM_StageI and GM_StageIII	0.0173226	0.024101	0.532342	-1.87849	GM_StageI down vs GM_StageIV	1	0.546185	1	1	No change between GM_StageI and GM_StageV	0.14767	0.787553	1.44052	1.44052	GM_StageII up vs GM_StageIII	0.286036	0.451962	0.766846	-1.30404	GM_StageII down vs GM_StageIV	0.170951	0.338825	1.44052	1.44052	GM_StageII up vs GM_StageV	0.0173226	0.372831	0.532342	-1.87849	GM_StageIII down vs GM_StageIV	1	0.942594	1	1	No change between GM_StageIII and GM_StageV	0.0237498	0.46066
OTU_128	0.058146	0.026894	0.848571	0.249056	0.911039	-1.09765	GM_StageI down vs GM_StageII	0.235042	0.26069	0.554164	-1.80452	GM_StageI down vs GM_StageIII	0.577086	0.269588	0.761009	-1.31404	GM_StageI down vs GM_StageIV	0.00814308	0.0246102	0.221285	-4.51905	GM_StageI down vs GM_StageV	0.314663	0.792117	0.608277	-1.64399	GM_StageII down vs GM_StageIII	0.712666	0.67177	0.83532	-1.19715	GM_StageII down vs GM_StageIV	0.0121446	0.121446	0.242893	-4.11703	GM_StageII down vs GM_StageV	0.517823	0.838473	1.37326	1.37326	GM_StageIII up vs GM_StageIV	0.0880653	0.645741	0.399314	-2.50429	GM_StageIII down vs GM_StageV	0.0257428	0.46066
OTU_96	0.0582702	0.026894	0.277976	0.127178	1.3906	1.3906	GM_StageI up vs GM_StageII	0.61206	0.462375	1.16443	1.16443	GM_StageI up vs GM_StageIII	0.117627	0.0885661	0.616348	-1.62246	GM_StageI down vs GM_StageIV	0.201997	0.203493	0.661102	-1.51263	GM_StageI down vs GM_StageV	0.554788	0.9014	0.837356	-1.19423	GM_StageII down vs GM_StageIII	0.0125688	0.126281	0.443223	-2.2562	GM_StageII down vs GM_StageIV	0.0282572	0.188381	0.475407	-2.10346	GM_StageII down vs GM_StageV	0.0442165	0.432467	0.529313	-1.88924	GM_StageIII down vs GM_StageIV	0.0865066	0.645741	0.567747	-1.76135	GM_StageIII down vs GM_StageV	0.825265	0.970197
OTU_140	0.0784329	0.0356513	0.00562518	0.00937529	2.39787	2.39787	GM_StageI up vs GM_StageII	0.244202	0.264695	1.40042	1.40042	GM_StageI up vs GM_StageIII	0.148479	0.101632	1.52509	1.52509	GM_StageI up vs GM_StageIV	0.157634	0.181949	1.54843	1.54843	GM_StageI up vs GM_StageV	0.0701055	0.734383	0.584029	-1.71224	GM_StageII down vs GM_StageIII	0.12282	0.347686	0.636019	-1.57228	GM_StageII down vs GM_StageIV	0.157546	0.338825	0.645753	-1.54858	GM_StageII down vs GM_StageV	0.764194	0.89673	1.08902	1.08902	GM_StageIII up vs GM_StageIV	0.739056	0.942594	1.10569	1.10569	GM_StageIII up vs GM_StageV	0.959776	0.970197
OTU_303	0.095506	0.040894	0.0325232	0.0316198	0.482462	-2.0727	GM_StageI down vs GM_StageII	0.0560783	0.0964963	0.525717	-1.90216	GM_StageI down vs GM_StageIII	0.0193043	0.0248391	0.445844	-2.24294	GM_StageI down vs GM_StageIV	0.434715	0.348798	0.765301	-1.30668	GM_StageI down vs GM_StageV	0.788783	0.926346	1.08965	1.08965	GM_StageII up vs GM_StageIII	0.805437	0.690104	0.9241	-1.08213	GM_StageII down vs GM_StageIV	0.184685	0.355163	1.58624	1.58624	GM_StageII up vs GM_StageV	0.608057	0.8498	0.848067	-1.17915	GM_StageIII down vs GM_StageIV	0.276547	0.839918	1.45573	1.45573	GM_StageIII up vs GM_StageV	0.123458	0.666777
OTU_246	0.0977733	0.040894	0.00851641	0.0124198	0.38368	-2.60634	GM_StageI down vs GM_StageII	0.0719767	0.112549	0.536817	-1.86283	GM_StageI down vs GM_StageIII	0.236985	0.139147	0.671204	-1.48986	GM_StageI down vs GM_StageIV	0.123762	0.166355	0.572502	-1.74672	GM_StageI down vs GM_StageV	0.316563	0.792117	1.39913	1.39913	GM_StageII up vs GM_StageIII	0.102996	0.328233	1.74938	1.74938	GM_StageII up vs GM_StageIV	0.262144	0.420474	1.49213	1.49213	GM_StageII up vs GM_StageV	0.502056	0.838473	1.25034	1.25034	GM_StageIII up vs GM_StageIV	0.854533	0.942594	1.06648	1.06648	GM_StageIII up vs GM_StageV	0.651228	0.970197
OTU_44	0.0987137	0.040894	0.366282	0.147355	0.712872	-1.40278	GM_StageI down vs GM_StageII	0.0228797	0.0519612	0.404416	-2.4727	GM_StageI down vs GM_StageIII	0.0704119	0.0611349	0.496105	-2.0157	GM_StageI down vs GM_StageIV	0.906784	0.533864	0.955017	-1.0471	GM_StageI down vs GM_StageV	0.137597	0.787553	0.567305	-1.76272	GM_StageII down vs GM_StageIII	0.333969	0.489553	0.695924	-1.43694	GM_StageII down vs GM_StageIV	0.460116	0.459265	1.33968	1.33968	GM_StageII up vs GM_StageV	0.582816	0.842839	1.22672	1.22672	GM_StageIII up vs GM_StageIV	0.0391391	0.556737	2.36147	2.36147	GM_StageIII up vs GM_StageV	0.107637	0.664732
OTU_2435	0.0998438	0.040894	1	0.281124	1	1	No change between GM_StageI and GM_StageII	0.327867	0.308956	0.679775	-1.47107	GM_StageI down vs GM_StageIII	0.0186312	0.0248391	0.37199	-2.68825	GM_StageI down vs GM_StageIV	0.645806	0.436963	0.826643	-1.20971	GM_StageI down vs GM_StageV	0.327867	0.792117	0.679775	-1.47107	GM_StageII down vs GM_StageIII	0.0186312	0.161914	0.37199	-2.68825	GM_StageII down vs GM_StageIV	0.645806	0.492982	0.826643	-1.20971	GM_StageII down vs GM_StageV	0.133244	0.553935	0.547225	-1.8274	GM_StageIII down vs GM_StageIV	0.636825	0.942594	1.21605	1.21605	GM_StageIII up vs GM_StageV	0.0649882	0.584842
OTU_390	0.100051	0.040894	0.626541	0.214989	0.863172	-1.15852	GM_StageI down vs GM_StageII	0.436443	0.371696	0.78939	-1.2668	GM_StageI down vs GM_StageIII	0.0114503	0.0178736	0.434899	-2.29938	GM_StageI down vs GM_StageIV	0.352055	0.302781	0.740061	-1.35124	GM_StageI down vs GM_StageV	0.767161	0.914921	0.914522	-1.09347	GM_StageII down vs GM_StageIII	0.0326625	0.198697	0.503839	-1.98476	GM_StageII down vs GM_StageIV	0.63135	0.492982	0.857374	-1.16635	GM_StageII down vs GM_StageV	0.0595434	0.471923	0.550931	-1.81511	GM_StageIII down vs GM_StageIV	0.840135	0.942594	0.937511	-1.06665	GM_StageIII down vs GM_StageV	0.108375	0.664732
OTU_40	0.100581	0.040894	0.0577182	0.0489674	0.691681	-1.44575	GM_StageI down vs GM_StageII	0.615629	0.462375	1.09763	1.09763	GM_StageI up vs GM_StageIII	0.417319	0.217141	0.859577	-1.16336	GM_StageI down vs GM_StageIV	0.608706	0.425009	1.10601	1.10601	GM_StageI up vs GM_StageV	0.0203897	0.348542	1.5869	1.5869	GM_StageII up vs GM_StageIII	0.248399	0.418035	1.24274	1.24274	GM_StageII up vs GM_StageIV	0.0254473	0.181766	1.59902	1.59902	GM_StageII up vs GM_StageV	0.196188	0.649963	0.783122	-1.27694	GM_StageIII down vs GM_StageIV	0.969066	0.942594	1.00763	1.00763	GM_StageIII up vs GM_StageV	0.208395	0.771316
OTU_27	0.101592	0.040894	0.183253	0.0960875	1.59865	1.59865	GM_StageI up vs GM_StageII	0.89478	0.568988	1.04658	1.04658	GM_StageI up vs GM_StageIII	0.0341043	0.037366	2.1718	2.1718	GM_StageI up vs GM_StageIV	0.0561231	0.107596	2.08115	2.08115	GM_StageI up vs GM_StageV	0.2275	0.787553	0.654668	-1.52749	GM_StageII down vs GM_StageIII	0.378333	0.510104	1.35853	1.35853	GM_StageII up vs GM_StageIV	0.473043	0.459265	1.30182	1.30182	GM_StageII up vs GM_StageV	0.0447185	0.432467	2.07514	2.07514	GM_StageIII up vs GM_StageIV	0.0716312	0.645741	1.98852	1.98852	GM_StageIII up vs GM_StageV	0.907036	0.970197
OTU_55	0.102009	0.040894	0.028077	0.0297786	0.534826	-1.86977	GM_StageI down vs GM_StageII	0.0181293	0.0427466	0.506329	-1.975	GM_StageI down vs GM_StageIII	0.0896247	0.0716998	0.624512	-1.60125	GM_StageI down vs GM_StageIV	0.0342731	0.0739864	0.52902	-1.89029	GM_StageI down vs GM_StageV	0.837417	0.926784	0.946717	-1.05628	GM_StageII down vs GM_StageIII	0.562798	0.58885	1.16769	1.16769	GM_StageII up vs GM_StageIV	0.969215	0.60241	0.989143	-1.01098	GM_StageII down vs GM_StageV	0.435278	0.833065	1.23341	1.23341	GM_StageIII up vs GM_StageIV	0.876877	0.942594	1.04481	1.04481	GM_StageIII up vs GM_StageV	0.559243	0.963939
OTU_1416	0.102235	0.040894	0.068274	0.0521993	1.49054	1.49054	GM_StageI up vs GM_StageII	0.0764509	0.117316	1.47236	1.47236	GM_StageI up vs GM_StageIII	0.0165811	0.0235821	1.72036	1.72036	GM_StageI up vs GM_StageIV	0.0228073	0.0544175	1.72036	1.72036	GM_StageI up vs GM_StageV	0.953219	0.926784	0.987801	-1.01235	GM_StageII down vs GM_StageIII	0.495796	0.562476	1.15418	1.15418	GM_StageII up vs GM_StageIV	0.520478	0.473051	1.15418	1.15418	GM_StageII up vs GM_StageV	0.460145	0.833065	1.16844	1.16844	GM_StageIII up vs GM_StageIV	0.485847	0.933993	1.16844	1.16844	GM_StageIII up vs GM_StageV	1	0.970197
OTU_37	0.105685	0.0417178	0.0124114	0.0160888	0.32905	-3.03905	GM_StageI down vs GM_StageII	0.285967	0.29817	0.642838	-1.5556	GM_StageI down vs GM_StageIII	0.0816018	0.0677934	0.477059	-2.09618	GM_StageI down vs GM_StageIV	0.0582641	0.107596	0.423078	-2.36363	GM_StageI down vs GM_StageV	0.112526	0.787553	1.95361	1.95361	GM_StageII up vs GM_StageIII	0.367636	0.502778	1.4498	1.4498	GM_StageII up vs GM_StageIV	0.56293	0.473051	1.28575	1.28575	GM_StageII up vs GM_StageV	0.467711	0.833065	0.742114	-1.3475	GM_StageIII down vs GM_StageIV	0.339401	0.86427	0.65814	-1.51943	GM_StageIII down vs GM_StageV	0.781514	0.970197
OTU_170	0.112992	0.0440227	0.273519	0.126928	0.66454	-1.5048	GM_StageI down vs GM_StageII	0.0125803	0.0324315	0.36837	-2.71466	GM_StageI down vs GM_StageIII	0.138825	0.0982682	0.571241	-1.75058	GM_StageI down vs GM_StageIV	0.0557346	0.107596	0.456881	-2.18875	GM_StageI down vs GM_StageV	0.119991	0.787553	0.554323	-1.804	GM_StageII down vs GM_StageIII	0.681036	0.659354	0.859604	-1.16333	GM_StageII down vs GM_StageIV	0.341953	0.434867	0.687516	-1.45451	GM_StageII down vs GM_StageV	0.240904	0.716061	1.55073	1.55073	GM_StageIII up vs GM_StageIV	0.58189	0.942594	1.24028	1.24028	GM_StageIII up vs GM_StageV	0.567976	0.963939
OTU_2	0.116528	0.0444829	0.419938	0.166077	1.17449	1.17449	GM_StageI up vs GM_StageII	0.716684	0.495367	1.07451	1.07451	GM_StageI up vs GM_StageIII	0.0205962	0.0258462	1.63676	1.63676	GM_StageI up vs GM_StageIV	0.102918	0.158725	1.42551	1.42551	GM_StageI up vs GM_StageV	0.653519	0.9014	0.914872	-1.09305	GM_StageII down vs GM_StageIII	0.105214	0.328233	1.39359	1.39359	GM_StageII up vs GM_StageIV	0.360972	0.434867	1.21373	1.21373	GM_StageII up vs GM_StageV	0.0440015	0.432467	1.52327	1.52327	GM_StageIII up vs GM_StageIV	0.187871	0.745676	1.32667	1.32667	GM_StageIII up vs GM_StageV	0.512284	0.956761
OTU_306	0.117138	0.0444829	0.682654	0.227551	0.86932	-1.15032	GM_StageI down vs GM_StageII	1	0.574606	1	1	No change between GM_StageI and GM_StageIII	0.0272341	0.0316906	0.446218	-2.24106	GM_StageI down vs GM_StageIV	1	0.546185	1	1	No change between GM_StageI and GM_StageV	0.682654	0.9014	1.15032	1.15032	GM_StageII up vs GM_StageIII	0.062716	0.263119	0.513295	-1.9482	GM_StageII down vs GM_StageIV	0.699824	0.522257	1.15032	1.15032	GM_StageII up vs GM_StageV	0.0272341	0.372831	0.446218	-2.24106	GM_StageIII down vs GM_StageIV	1	0.942594	1	1	No change between GM_StageIII and GM_StageV	0.0360845	0.528319
OTU_189	0.122979	0.046117	0.334424	0.140599	1.4466	1.4466	GM_StageI up vs GM_StageII	0.111518	0.15416	0.53677	-1.863	GM_StageI down vs GM_StageIII	0.467216	0.228258	0.758373	-1.31861	GM_StageI down vs GM_StageIV	0.727161	0.464291	1.15029	1.15029	GM_StageI up vs GM_StageV	0.015486	0.306118	0.371056	-2.69501	GM_StageII down vs GM_StageIII	0.0994212	0.326926	0.524244	-1.90751	GM_StageII down vs GM_StageIV	0.568956	0.47413	0.795168	-1.2576	GM_StageII down vs GM_StageV	0.36552	0.821538	1.41285	1.41285	GM_StageIII up vs GM_StageIV	0.0689859	0.645741	2.14299	2.14299	GM_StageIII up vs GM_StageV	0.30529	0.893959
OTU_551	0.128826	0.0477132	0.0842212	0.0561498	0.563087	-1.77592	GM_StageI down vs GM_StageII	0.0994068	0.141521	0.579235	-1.72641	GM_StageI down vs GM_StageIII	0.0219284	0.0269888	0.455341	-2.19615	GM_StageI down vs GM_StageIV	0.0277142	0.0628188	0.450681	-2.21887	GM_StageI down vs GM_StageV	0.929462	0.926784	1.02868	1.02868	GM_StageII up vs GM_StageIII	0.50854	0.562476	0.808651	-1.23663	GM_StageII down vs GM_StageIV	0.513379	0.473051	0.800374	-1.24942	GM_StageII down vs GM_StageV	0.454528	0.833065	0.786108	-1.27209	GM_StageIII down vs GM_StageIV	0.462069	0.92766	0.778061	-1.28525	GM_StageIII down vs GM_StageV	0.97577	0.970197
OTU_34	0.133501	0.0488417	0.0311893	0.0309681	0.365741	-2.73418	GM_StageI down vs GM_StageII	0.0483292	0.0892221	0.401641	-2.48979	GM_StageI down vs GM_StageIII	0.0344468	0.037366	0.373483	-2.6775	GM_StageI down vs GM_StageIV	0.32247	0.283857	0.627654	-1.59324	GM_StageI down vs GM_StageV	0.830828	0.926784	1.09816	1.09816	GM_StageII up vs GM_StageIII	0.961858	0.732932	1.02117	1.02117	GM_StageII up vs GM_StageIV	0.25339	0.420474	1.71612	1.71612	GM_StageII up vs GM_StageV	0.868246	0.907158	0.929893	-1.07539	GM_StageIII down vs GM_StageIV	0.342459	0.86427	1.56272	1.56272	GM_StageIII up vs GM_StageV	0.271642	0.851339
OTU_152	0.140232	0.0506863	0.90406	0.263684	1.04792	1.04792	GM_StageI up vs GM_StageII	0.947978	0.573418	0.974982	-1.02566	GM_StageI down vs GM_StageIII	0.43335	0.220114	0.735841	-1.35899	GM_StageI down vs GM_StageIV	0.032273	0.071368	0.391023	-2.55739	GM_StageI down vs GM_StageV	0.852663	0.926784	0.930394	-1.07481	GM_StageII down vs GM_StageIII	0.367786	0.502778	0.702189	-1.42412	GM_StageII down vs GM_StageIV	0.0254271	0.181766	0.373141	-2.67995	GM_StageII down vs GM_StageV	0.471715	0.833065	0.754723	-1.32499	GM_StageIII down vs GM_StageIV	0.0366549	0.556737	0.401057	-2.49341	GM_StageIII down vs GM_StageV	0.136328	0.676762
OTU_66	0.143065	0.0510947	0.027917	0.0297786	0.507667	-1.9698	GM_StageI down vs GM_StageII	0.0919084	0.132828	0.603187	-1.65786	GM_StageI down vs GM_StageIII	0.0285989	0.0326844	0.509353	-1.96327	GM_StageI down vs GM_StageIV	0.0681986	0.117555	0.557615	-1.79335	GM_StageI down vs GM_StageV	0.552105	0.9014	1.18815	1.18815	GM_StageII up vs GM_StageIII	0.990831	0.732932	1.00332	1.00332	GM_StageII up vs GM_StageIV	0.759435	0.5348	1.09839	1.09839	GM_StageII up vs GM_StageV	0.559707	0.842839	0.844437	-1.18422	GM_StageIII down vs GM_StageIV	0.79761	0.942594	0.924448	-1.08173	GM_StageIII down vs GM_StageV	0.767667	0.970197
OTU_98	0.146234	0.0516121	0.0982786	0.0636991	0.381055	-2.62429	GM_StageI down vs GM_StageII	0.296967	0.29817	0.551502	-1.81323	GM_StageI down vs GM_StageIII	0.0150903	0.0222119	0.227083	-4.40368	GM_StageI down vs GM_StageIV	0.125965	0.166355	0.389814	-2.56533	GM_StageI down vs GM_StageV	0.513281	0.887652	1.4473	1.4473	GM_StageII up vs GM_StageIII	0.362632	0.502778	0.595932	-1.67804	GM_StageII down vs GM_StageIV	0.969605	0.60241	1.02299	1.02299	GM_StageII up vs GM_StageV	0.126317	0.553935	0.411754	-2.42864	GM_StageIII down vs GM_StageIV	0.562467	0.942594	0.706822	-1.41478	GM_StageIII down vs GM_StageV	0.3701	0.902064
OTU_42	0.150697	0.0521173	0.521527	0.195258	0.727517	-1.37454	GM_StageI down vs GM_StageII	0.660857	0.477542	0.804852	-1.24246	GM_StageI down vs GM_StageIII	0.0194055	0.0248391	0.288253	-3.46918	GM_StageI down vs GM_StageIV	0.368394	0.310901	0.621238	-1.60969	GM_StageI down vs GM_StageV	0.837911	0.926784	1.1063	1.1063	GM_StageII up vs GM_StageIII	0.0726314	0.284337	0.396215	-2.52388	GM_StageII down vs GM_StageIV	0.763182	0.5348	0.853916	-1.17108	GM_StageII down vs GM_StageV	0.0485366	0.432467	0.358144	-2.79217	GM_StageIII down vs GM_StageIV	0.621989	0.942594	0.771867	-1.29556	GM_StageIII down vs GM_StageV	0.153615	0.686581
OTU_269	0.15114	0.0521173	0.742698	0.237392	0.916279	-1.09137	GM_StageI down vs GM_StageII	0.74741	0.505613	1.08956	1.08956	GM_StageI up vs GM_StageIII	0.0416174	0.0443918	1.77451	1.77451	GM_StageI up vs GM_StageIV	0.566302	0.41407	1.17644	1.17644	GM_StageI up vs GM_StageV	0.517246	0.887652	1.18911	1.18911	GM_StageII up vs GM_StageIII	0.020924	0.164747	1.93664	1.93664	GM_StageII up vs GM_StageIV	0.38056	0.434867	1.28394	1.28394	GM_StageII up vs GM_StageV	0.0786981	0.553935	1.62865	1.62865	GM_StageIII up vs GM_StageIV	0.785837	0.942594	1.07975	1.07975	GM_StageIII up vs GM_StageV	0.156224	0.686581
OTU_150	0.154151	0.0523802	0.0275245	0.0297786	2.36527	2.36527	GM_StageI up vs GM_StageII	0.330384	0.308956	1.43366	1.43366	GM_StageI up vs GM_StageIII	0.0611056	0.0591317	2.05003	2.05003	GM_StageI up vs GM_StageIV	0.561465	0.413871	1.25366	1.25366	GM_StageI up vs GM_StageV	0.181101	0.787553	0.606131	-1.64981	GM_StageII down vs GM_StageIII	0.696049	0.666818	0.866721	-1.15377	GM_StageII down vs GM_StageIV	0.113392	0.333505	0.530029	-1.88669	GM_StageII down vs GM_StageV	0.333814	0.813401	1.42992	1.42992	GM_StageIII up vs GM_StageIV	0.729625	0.942594	0.874446	-1.14358	GM_StageIII down vs GM_StageV	0.213987	0.771316
OTU_15	0.155395	0.0523802	0.206048	0.105666	0.584982	-1.70946	GM_StageI down vs GM_StageII	0.0178798	0.0427466	0.34592	-2.89084	GM_StageI down vs GM_StageIII	0.227363	0.138583	0.599968	-1.66676	GM_StageI down vs GM_StageIV	0.066981	0.117555	0.430004	-2.32556	GM_StageI down vs GM_StageV	0.214951	0.787553	0.591335	-1.69109	GM_StageII down vs GM_StageIII	0.951392	0.732932	1.02562	1.02562	GM_StageII up vs GM_StageIV	0.487175	0.468438	0.735073	-1.36041	GM_StageII down vs GM_StageV	0.19456	0.649963	1.73441	1.73441	GM_StageIII up vs GM_StageIV	0.622164	0.942594	1.24307	1.24307	GM_StageIII up vs GM_StageV	0.452601	0.956761
OTU_29	0.16116	0.05372	0.173078	0.0917837	0.773593	-1.29267	GM_StageI down vs GM_StageII	0.0787153	0.117316	0.713937	-1.40068	GM_StageI down vs GM_StageIII	0.829733	0.340403	1.04033	1.04033	GM_StageI up vs GM_StageIV	0.906557	0.533864	1.02314	1.02314	GM_StageI up vs GM_StageV	0.663097	0.9014	0.922884	-1.08356	GM_StageII down vs GM_StageIII	0.1188	0.347686	1.3448	1.3448	GM_StageII up vs GM_StageIV	0.162378	0.338825	1.32259	1.32259	GM_StageII up vs GM_StageV	0.0516933	0.432467	1.45717	1.45717	GM_StageIII up vs GM_StageIV	0.0768532	0.645741	1.4331	1.4331	GM_StageIII up vs GM_StageV	0.931896	0.970197
OTU_214	0.178202	0.0587479	0.0503778	0.0452108	2.39771	2.39771	GM_StageI up vs GM_StageII	0.932763	0.573418	0.964846	-1.03643	GM_StageI down vs GM_StageIII	0.465872	0.228258	1.36548	1.36548	GM_StageI up vs GM_StageIV	0.876497	0.529794	0.932454	-1.07244	GM_StageI down vs GM_StageV	0.0424887	0.535513	0.402403	-2.48507	GM_StageII down vs GM_StageIII	0.19445	0.37693	0.569491	-1.75595	GM_StageII down vs GM_StageIV	0.0467169	0.245445	0.388894	-2.5714	GM_StageII down vs GM_StageV	0.417026	0.833065	1.41523	1.41523	GM_StageIII up vs GM_StageIV	0.939495	0.942594	0.966428	-1.03474	GM_StageIII down vs GM_StageV	0.400973	0.949673
OTU_14	0.186043	0.0600591	0.043421	0.0405263	1.83426	1.83426	GM_StageI up vs GM_StageII	0.329504	0.308956	1.32388	1.32388	GM_StageI up vs GM_StageIII	0.235316	0.139147	1.41001	1.41001	GM_StageI up vs GM_StageIV	0.869299	0.529794	0.951615	-1.05085	GM_StageI down vs GM_StageV	0.259191	0.792117	0.721754	-1.38551	GM_StageII down vs GM_StageIII	0.359883	0.502778	0.768711	-1.30088	GM_StageII down vs GM_StageIV	0.0398213	0.221229	0.518801	-1.92752	GM_StageII down vs GM_StageV	0.824511	0.907158	1.06506	1.06506	GM_StageIII up vs GM_StageIV	0.280706	0.839918	0.718806	-1.3912	GM_StageIII down vs GM_StageV	0.201761	0.771316
OTU_604	0.186183	0.0600591	0.0396027	0.0377169	2.07925	2.07925	GM_StageI up vs GM_StageII	0.105155	0.147503	1.75711	1.75711	GM_StageI up vs GM_StageIII	0.0341415	0.037366	2.13017	2.13017	GM_StageI up vs GM_StageIV	0.245828	0.229778	1.52315	1.52315	GM_StageI up vs GM_StageV	0.617205	0.9014	0.845071	-1.18333	GM_StageII down vs GM_StageIII	0.942542	0.732932	1.02449	1.02449	GM_StageII up vs GM_StageIV	0.386827	0.434867	0.732547	-1.3651	GM_StageII down vs GM_StageV	0.567955	0.842839	1.21231	1.21231	GM_StageIII up vs GM_StageIV	0.688794	0.942594	0.866847	-1.15361	GM_StageIII down vs GM_StageV	0.351766	0.902064
OTU_192	0.188552	0.0601761	0.0842248	0.0561498	0.464703	-2.15191	GM_StageI down vs GM_StageII	0.0449627	0.0875255	0.405438	-2.46647	GM_StageI down vs GM_StageIII	0.641899	0.283321	0.819744	-1.21989	GM_StageI down vs GM_StageIV	0.608624	0.425009	0.792734	-1.26146	GM_StageI down vs GM_StageV	0.749197	0.9014	0.872466	-1.14618	GM_StageII down vs GM_StageIII	0.19304	0.37693	1.76402	1.76402	GM_StageII up vs GM_StageIV	0.245948	0.420474	1.70589	1.70589	GM_StageII up vs GM_StageV	0.110539	0.553935	2.02187	2.02187	GM_StageIII up vs GM_StageIV	0.149269	0.707764	1.95525	1.95525	GM_StageIII up vs GM_StageV	0.940917	0.970197
OTU_312	0.198339	0.0626334	0.0598102	0.0489674	0.421539	-2.37226	GM_StageI down vs GM_StageII	0.0517317	0.091378	0.408266	-2.44938	GM_StageI down vs GM_StageIII	0.60245	0.279397	0.795644	-1.25684	GM_StageI down vs GM_StageIV	0.194194	0.202034	0.540072	-1.8516	GM_StageI down vs GM_StageV	0.941679	0.926784	0.968513	-1.03251	GM_StageII down vs GM_StageIII	0.157408	0.354654	1.88747	1.88747	GM_StageII up vs GM_StageIV	0.594571	0.479493	1.28119	1.28119	GM_StageII up vs GM_StageV	0.138581	0.553935	1.94884	1.94884	GM_StageIII up vs GM_StageIV	0.548295	0.942594	1.32284	1.32284	GM_StageIII up vs GM_StageV	0.407848	0.951958
OTU_591	0.206709	0.0645965	0.0304284	0.0309681	1.97474	1.97474	GM_StageI up vs GM_StageII	0.0846428	0.12421	1.6978	1.6978	GM_StageI up vs GM_StageIII	0.357109	0.192796	1.31599	1.31599	GM_StageI up vs GM_StageIV	0.130945	0.167216	1.62761	1.62761	GM_StageI up vs GM_StageV	0.609511	0.9014	0.859762	-1.16311	GM_StageII down vs GM_StageIII	0.179125	0.37693	0.666415	-1.50057	GM_StageII down vs GM_StageIV	0.53846	0.473051	0.824218	-1.21327	GM_StageII down vs GM_StageV	0.392184	0.822903	0.775115	-1.29013	GM_StageIII down vs GM_StageIV	0.892612	0.942594	0.958658	-1.04312	GM_StageIII down vs GM_StageV	0.499335	0.956761
OTU_602	0.216675	0.065809	0.319794	0.138183	0.731531	-1.367	GM_StageI down vs GM_StageII	0.0776792	0.117316	0.565107	-1.76958	GM_StageI down vs GM_StageIII	0.726857	0.31009	1.11458	1.11458	GM_StageI up vs GM_StageIV	0.874936	0.529794	0.949541	-1.05314	GM_StageI down vs GM_StageV	0.409421	0.818789	0.772499	-1.2945	GM_StageII down vs GM_StageIII	0.184785	0.37693	1.52363	1.52363	GM_StageII up vs GM_StageIV	0.431532	0.440339	1.29802	1.29802	GM_StageII up vs GM_StageV	0.038808	0.432467	1.97234	1.97234	GM_StageIII up vs GM_StageIV	0.126326	0.681598	1.68028	1.68028	GM_StageIII up vs GM_StageV	0.627129	0.970197
OTU_60	0.218817	0.065809	0.989618	0.281124	0.995185	-1.00484	GM_StageI down vs GM_StageII	0.291627	0.29817	0.67226	-1.48752	GM_StageI down vs GM_StageIII	0.874693	0.351317	1.06026	1.06026	GM_StageI up vs GM_StageIV	0.0687179	0.117555	0.472695	-2.11553	GM_StageI down vs GM_StageV	0.297361	0.792117	0.675513	-1.48036	GM_StageII down vs GM_StageIII	0.864461	0.725352	1.06539	1.06539	GM_StageII up vs GM_StageIV	0.0703701	0.293209	0.474982	-2.10534	GM_StageII down vs GM_StageV	0.228435	0.702032	1.57716	1.57716	GM_StageIII up vs GM_StageIV	0.375769	0.918699	0.703143	-1.42219	GM_StageIII down vs GM_StageV	0.0512667	0.584842
OTU_38	0.218949	0.065809	0.255435	0.125045	1.32658	1.32658	GM_StageI up vs GM_StageII	0.964561	0.574606	0.989209	-1.01091	GM_StageI down vs GM_StageIII	0.0934319	0.0738227	1.53058	1.53058	GM_StageI up vs GM_StageIV	0.745254	0.469234	0.919182	-1.08792	GM_StageI down vs GM_StageV	0.238261	0.787553	0.745683	-1.34105	GM_StageII down vs GM_StageIII	0.559829	0.58885	1.15378	1.15378	GM_StageII up vs GM_StageIV	0.167475	0.338825	0.692896	-1.44322	GM_StageII down vs GM_StageV	0.085953	0.553935	1.54727	1.54727	GM_StageIII up vs GM_StageIV	0.777047	0.942594	0.92921	-1.07618	GM_StageIII down vs GM_StageV	0.0606075	0.584842
OTU_154	0.219363	0.065809	0.0751249	0.0552983	1.84591	1.84591	GM_StageI up vs GM_StageII	0.648066	0.471874	1.16299	1.16299	GM_StageI up vs GM_StageIII	0.764058	0.319606	0.905624	-1.10421	GM_StageI down vs GM_StageIV	0.255944	0.232056	1.4985	1.4985	GM_StageI up vs GM_StageV	0.172081	0.787553	0.630034	-1.58722	GM_StageII down vs GM_StageIII	0.0414236	0.209994	0.490611	-2.03827	GM_StageII down vs GM_StageIV	0.553101	0.473051	0.811798	-1.23183	GM_StageII down vs GM_StageV	0.451759	0.833065	0.778706	-1.28418	GM_StageIII down vs GM_StageIV	0.471868	0.928577	1.2885	1.2885	GM_StageIII up vs GM_StageV	0.161058	0.686581
OTU_21	0.22917	0.0680704	0.223914	0.112358	0.619069	-1.61533	GM_StageI down vs GM_StageII	0.255511	0.273841	0.639411	-1.56394	GM_StageI down vs GM_StageIII	0.0559998	0.0559998	0.460072	-2.17357	GM_StageI down vs GM_StageIV	0.040816	0.0860617	0.411517	-2.43003	GM_StageI down vs GM_StageV	0.933336	0.926784	1.03286	1.03286	GM_StageII up vs GM_StageIII	0.44603	0.542628	0.743167	-1.34559	GM_StageII down vs GM_StageIV	0.325475	0.434867	0.664736	-1.50436	GM_StageII down vs GM_StageV	0.398915	0.822903	0.719524	-1.38981	GM_StageIII down vs GM_StageIV	0.289647	0.839918	0.643588	-1.55379	GM_StageIII down vs GM_StageV	0.785772	0.970197
OTU_18	0.232024	0.0682423	0.0792471	0.0560333	0.581226	-1.7205	GM_StageI down vs GM_StageII	0.416705	0.36415	0.784334	-1.27497	GM_StageI down vs GM_StageIII	0.731142	0.31009	1.10741	1.10741	GM_StageI up vs GM_StageIV	0.957851	0.546185	0.983518	-1.01676	GM_StageI down vs GM_StageV	0.318558	0.792117	1.34945	1.34945	GM_StageII up vs GM_StageIII	0.040116	0.209994	1.90531	1.90531	GM_StageII up vs GM_StageIV	0.106414	0.332544	1.69214	1.69214	GM_StageII up vs GM_StageV	0.252966	0.71875	1.41192	1.41192	GM_StageIII up vs GM_StageIV	0.474761	0.928577	1.25395	1.25395	GM_StageIII up vs GM_StageV	0.706468	0.970197
OTU_630	0.249536	0.0726803	0.170003	0.0911896	2.00775	2.00775	GM_StageI up vs GM_StageII	0.170003	0.202468	2.00775	2.00775	GM_StageI up vs GM_StageIII	0.170003	0.112167	2.00775	2.00775	GM_StageI up vs GM_StageIV	0.71705	0.464291	0.826407	-1.21006	GM_StageI down vs GM_StageV	1	0.926784	1	1	No change between GM_StageII and GM_StageIII	1	0.732932	1	1	No change between GM_StageII and GM_StageIV	0.10306	0.332451	0.411608	-2.4295	GM_StageII down vs GM_StageV	1	0.907158	1	1	No change between GM_StageIII and GM_StageIV	0.10306	0.645741	0.411608	-2.4295	GM_StageIII down vs GM_StageV	0.10306	0.664732
OTU_1	0.262318	0.0756687	0.544354	0.19839	1.07731	1.07731	GM_StageI up vs GM_StageII	0.120559	0.161965	1.21662	1.21662	GM_StageI up vs GM_StageIII	0.0466154	0.0481191	1.29272	1.29272	GM_StageI up vs GM_StageIV	0.187712	0.200226	1.19107	1.19107	GM_StageI up vs GM_StageV	0.326102	0.792117	1.12931	1.12931	GM_StageII up vs GM_StageIII	0.147235	0.347686	1.19995	1.19995	GM_StageII up vs GM_StageIV	0.442379	0.446848	1.1056	1.1056	GM_StageII up vs GM_StageV	0.620752	0.8498	1.06256	1.06256	GM_StageIII up vs GM_StageIV	0.870051	0.942594	0.979007	-1.02144	GM_StageIII down vs GM_StageV	0.529788	0.956761
OTU_229	0.282799	0.0807997	0.574901	0.202791	0.872077	-1.14669	GM_StageI down vs GM_StageII	0.117171	0.159661	0.674571	-1.48242	GM_StageI down vs GM_StageIII	0.984019	0.38168	0.995144	-1.00488	GM_StageI down vs GM_StageIV	0.552984	0.410961	1.16609	1.16609	GM_StageI up vs GM_StageV	0.297726	0.792117	0.773522	-1.29279	GM_StageII down vs GM_StageIII	0.588465	0.601651	1.14112	1.14112	GM_StageII up vs GM_StageIV	0.267621	0.420474	1.33714	1.33714	GM_StageII up vs GM_StageV	0.12148	0.553935	1.47523	1.47523	GM_StageIII up vs GM_StageIV	0.044511	0.580388	1.72864	1.72864	GM_StageIII up vs GM_StageV	0.540601	0.956761
OTU_619	0.286967	0.081217	0.826065	0.248472	1.09846	1.09846	GM_StageI up vs GM_StageII	0.221606	0.251641	1.70345	1.70345	GM_StageI up vs GM_StageIII	0.0610235	0.0591317	2.31478	2.31478	GM_StageI up vs GM_StageIV	0.23804	0.224816	1.72397	1.72397	GM_StageI up vs GM_StageV	0.310967	0.792117	1.55076	1.55076	GM_StageII up vs GM_StageIII	0.0930308	0.31441	2.10729	2.10729	GM_StageII up vs GM_StageIV	0.326031	0.434867	1.56944	1.56944	GM_StageII up vs GM_StageV	0.475758	0.833065	1.35887	1.35887	GM_StageIII up vs GM_StageIV	0.978916	0.942594	1.01204	1.01204	GM_StageIII up vs GM_StageV	0.5177	0.956761
OTU_20	0.290239	0.0813755	0.185793	0.0963373	0.605326	-1.652	GM_StageI down vs GM_StageII	0.0566527	0.0964963	0.476113	-2.10034	GM_StageI down vs GM_StageIII	0.0652593	0.0591317	0.488979	-2.04508	GM_StageI down vs GM_StageIV	0.155038	0.181949	0.563078	-1.77595	GM_StageI down vs GM_StageV	0.519277	0.887652	0.786539	-1.27139	GM_StageII down vs GM_StageIII	0.566264	0.58885	0.807794	-1.23794	GM_StageII down vs GM_StageIV	0.853996	0.569331	0.930206	-1.07503	GM_StageII down vs GM_StageV	0.942631	0.907158	1.02702	1.02702	GM_StageIII up vs GM_StageIV	0.670206	0.942594	1.18266	1.18266	GM_StageIII up vs GM_StageV	0.720018	0.970197
OTU_59	0.299388	0.0822339	0.084029	0.0561498	0.666046	-1.5014	GM_StageI down vs GM_StageII	0.159374	0.192428	0.721481	-1.38604	GM_StageI down vs GM_StageIII	0.067528	0.0600249	0.649124	-1.54054	GM_StageI down vs GM_StageIV	0.0889783	0.14406	0.654567	-1.52773	GM_StageI down vs GM_StageV	0.723783	0.9014	1.08323	1.08323	GM_StageII up vs GM_StageIII	0.909291	0.732932	0.974593	-1.02607	GM_StageII down vs GM_StageIV	0.942147	0.60241	0.982765	-1.01754	GM_StageII down vs GM_StageV	0.640797	0.853951	0.89971	-1.11147	GM_StageIII down vs GM_StageIV	0.685158	0.942594	0.907254	-1.10223	GM_StageIII down vs GM_StageV	0.972193	0.970197
OTU_724	0.300209	0.0822339	0.0691295	0.0521993	0.55958	-1.78705	GM_StageI down vs GM_StageII	0.670251	0.477695	0.877802	-1.13921	GM_StageI down vs GM_StageIII	0.660089	0.289354	0.874033	-1.14412	GM_StageI down vs GM_StageIV	0.155887	0.181949	0.623562	-1.60369	GM_StageI down vs GM_StageV	0.151587	0.787553	1.56868	1.56868	GM_StageII up vs GM_StageIII	0.155327	0.354654	1.56195	1.56195	GM_StageII up vs GM_StageIV	0.738545	0.532921	1.11434	1.11434	GM_StageII up vs GM_StageV	0.988756	0.907158	0.995706	-1.00431	GM_StageIII down vs GM_StageIV	0.298073	0.839918	0.710367	-1.40772	GM_StageIII down vs GM_StageV	0.304021	0.893959
OTU_325	0.301524	0.0822339	0.16858	0.0911896	0.573276	-1.74436	GM_StageI down vs GM_StageII	0.0379763	0.0754658	0.420212	-2.37975	GM_StageI down vs GM_StageIII	0.352522	0.192796	0.690403	-1.44843	GM_StageI down vs GM_StageIV	0.234438	0.223744	0.602714	-1.65916	GM_StageI down vs GM_StageV	0.434138	0.838686	0.733002	-1.36425	GM_StageII down vs GM_StageIII	0.637925	0.641246	1.20431	1.20431	GM_StageII up vs GM_StageIV	0.904607	0.595136	1.05135	1.05135	GM_StageII up vs GM_StageV	0.216884	0.680419	1.64299	1.64299	GM_StageIII up vs GM_StageIV	0.392605	0.920905	1.43431	1.43431	GM_StageIII up vs GM_StageV	0.74542	0.970197
OTU_199	0.313162	0.0846385	0.432358	0.169552	0.791255	-1.26382	GM_StageI down vs GM_StageII	0.794649	0.521592	0.92585	-1.08009	GM_StageI down vs GM_StageIII	0.0716042	0.0611349	0.572974	-1.74528	GM_StageI down vs GM_StageIV	0.164825	0.182246	0.639386	-1.564	GM_StageI down vs GM_StageV	0.596665	0.9014	1.1701	1.1701	GM_StageII up vs GM_StageIII	0.282571	0.451962	0.724133	-1.38096	GM_StageII down vs GM_StageIV	0.499517	0.473051	0.808066	-1.23752	GM_StageII down vs GM_StageV	0.116591	0.553935	0.618862	-1.61587	GM_StageIII down vs GM_StageIV	0.246464	0.839918	0.690593	-1.44803	GM_StageIII down vs GM_StageV	0.727046	0.970197
OTU_92	0.319113	0.0854768	0.697617	0.23089	0.861953	-1.16016	GM_StageI down vs GM_StageII	0.952385	0.573418	1.02305	1.02305	GM_StageI up vs GM_StageIII	0.114761	0.087437	1.86355	1.86355	GM_StageI up vs GM_StageIV	0.547442	0.410205	1.27719	1.27719	GM_StageI up vs GM_StageV	0.654273	0.9014	1.18689	1.18689	GM_StageII up vs GM_StageIII	0.0546923	0.246453	2.16201	2.16201	GM_StageII up vs GM_StageIV	0.337259	0.434867	1.48174	1.48174	GM_StageII up vs GM_StageV	0.127776	0.553935	1.82157	1.82157	GM_StageIII up vs GM_StageIV	0.585038	0.942594	1.24842	1.24842	GM_StageIII up vs GM_StageV	0.356067	0.902064
OTU_424	0.332765	0.0883448	0.0813923	0.0561498	0.467021	-2.14123	GM_StageI down vs GM_StageII	0.674446	0.477695	0.838197	-1.19304	GM_StageI down vs GM_StageIII	0.795262	0.330498	0.896845	-1.11502	GM_StageI down vs GM_StageIV	0.884192	0.530906	1.06693	1.06693	GM_StageI up vs GM_StageV	0.173621	0.787553	1.79477	1.79477	GM_StageII up vs GM_StageIII	0.131257	0.347686	1.92035	1.92035	GM_StageII up vs GM_StageIV	0.0751429	0.300127	2.28453	2.28453	GM_StageII up vs GM_StageV	0.871875	0.907158	1.06997	1.06997	GM_StageIII up vs GM_StageIV	0.588824	0.942594	1.27288	1.27288	GM_StageIII up vs GM_StageV	0.696709	0.970197
OTU_35	0.340594	0.0896299	0.506053	0.193572	0.755683	-1.32331	GM_StageI down vs GM_StageII	0.60803	0.462375	0.80611	-1.24053	GM_StageI down vs GM_StageIII	0.0645215	0.0591317	0.444391	-2.25027	GM_StageI down vs GM_StageIV	0.93506	0.540479	0.964454	-1.03686	GM_StageI down vs GM_StageV	0.877441	0.926784	1.06673	1.06673	GM_StageII up vs GM_StageIII	0.21436	0.389261	0.588065	-1.70049	GM_StageII down vs GM_StageIV	0.584368	0.479493	1.27627	1.27627	GM_StageII up vs GM_StageV	0.165878	0.624481	0.551278	-1.81397	GM_StageIII down vs GM_StageIV	0.68702	0.942594	1.19643	1.19643	GM_StageIII up vs GM_StageV	0.0931733	0.664732
OTU_72	0.351498	0.0914923	0.30354	0.136204	1.48696	1.48696	GM_StageI up vs GM_StageII	0.0501481	0.090252	2.19166	2.19166	GM_StageI up vs GM_StageIII	0.152448	0.101632	1.74938	1.74938	GM_StageI up vs GM_StageIV	0.217036	0.211901	1.66211	1.66211	GM_StageI up vs GM_StageV	0.314109	0.792117	1.47392	1.47392	GM_StageII up vs GM_StageIII	0.669732	0.657129	1.17648	1.17648	GM_StageII up vs GM_StageIV	0.782628	0.5348	1.11779	1.11779	GM_StageII up vs GM_StageV	0.555075	0.842839	0.798201	-1.25282	GM_StageIII down vs GM_StageIV	0.495438	0.933993	0.758379	-1.3186	GM_StageIII down vs GM_StageV	0.899017	0.970197
OTU_111	0.35377	0.0914923	0.126852	0.0789302	0.549114	-1.82111	GM_StageI down vs GM_StageII	0.319264	0.308956	0.681132	-1.46815	GM_StageI down vs GM_StageIII	0.215133	0.133675	0.617872	-1.61846	GM_StageI down vs GM_StageIV	0.0573425	0.107596	0.446763	-2.23832	GM_StageI down vs GM_StageV	0.572808	0.9014	1.24042	1.24042	GM_StageII up vs GM_StageIII	0.756778	0.683385	1.12522	1.12522	GM_StageII up vs GM_StageIV	0.610443	0.484479	0.813607	-1.2291	GM_StageII down vs GM_StageV	0.79795	0.89673	0.907126	-1.10238	GM_StageIII down vs GM_StageIV	0.302872	0.839918	0.655913	-1.52459	GM_StageIII down vs GM_StageV	0.425595	0.956761
OTU_287	0.373788	0.0958431	0.562097	0.200238	0.862088	-1.15997	GM_StageI down vs GM_StageII	0.34775	0.318943	0.784952	-1.27396	GM_StageI down vs GM_StageIII	0.0716425	0.0611349	0.618904	-1.61576	GM_StageI down vs GM_StageIV	0.155219	0.181949	0.673792	-1.48414	GM_StageI down vs GM_StageV	0.713486	0.9014	0.910524	-1.09827	GM_StageII down vs GM_StageIII	0.203252	0.37995	0.717913	-1.39293	GM_StageII down vs GM_StageIV	0.367149	0.434867	0.781582	-1.27946	GM_StageII down vs GM_StageV	0.356498	0.813401	0.788461	-1.26829	GM_StageIII down vs GM_StageIV	0.573728	0.942594	0.858387	-1.16498	GM_StageIII down vs GM_StageV	0.753544	0.970197
OTU_119	0.39624	0.100739	0.210992	0.107025	0.746548	-1.3395	GM_StageI down vs GM_StageII	0.935378	0.573418	0.98162	-1.01872	GM_StageI down vs GM_StageIII	0.27149	0.157958	0.774358	-1.29139	GM_StageI down vs GM_StageIV	0.126601	0.166355	0.682062	-1.46614	GM_StageI down vs GM_StageV	0.240228	0.787553	1.31488	1.31488	GM_StageII up vs GM_StageIII	0.873031	0.727526	1.03725	1.03725	GM_StageII up vs GM_StageIV	0.710187	0.526064	0.91362	-1.09455	GM_StageII down vs GM_StageV	0.306713	0.803487	0.788857	-1.26766	GM_StageIII down vs GM_StageIV	0.144911	0.707764	0.694833	-1.4392	GM_StageIII down vs GM_StageV	0.602291	0.970197
OTU_116	0.404361	0.10194	0.841114	0.248472	1.0735	1.0735	GM_StageI up vs GM_StageII	0.326046	0.308956	0.703396	-1.42167	GM_StageI down vs GM_StageIII	0.627375	0.282761	0.841815	-1.18791	GM_StageI down vs GM_StageIV	0.128443	0.166365	0.555229	-1.80106	GM_StageI down vs GM_StageV	0.240597	0.787553	0.655236	-1.52617	GM_StageII down vs GM_StageIII	0.49446	0.562476	0.784177	-1.27522	GM_StageII down vs GM_StageIV	0.0908841	0.332451	0.517213	-1.93344	GM_StageII down vs GM_StageV	0.612667	0.8498	1.19679	1.19679	GM_StageIII up vs GM_StageIV	0.530435	0.942594	0.789354	-1.26686	GM_StageIII down vs GM_StageV	0.274877	0.851339
OTU_50	0.408132	0.102033	0.316865	0.138183	1.33228	1.33228	GM_StageI up vs GM_StageII	0.403003	0.355929	1.26962	1.26962	GM_StageI up vs GM_StageIII	0.745443	0.313871	1.09629	1.09629	GM_StageI up vs GM_StageIV	0.0726428	0.121968	1.75519	1.75519	GM_StageI up vs GM_StageV	0.864778	0.926784	0.952968	-1.04935	GM_StageII down vs GM_StageIII	0.493284	0.562476	0.82287	-1.21526	GM_StageII down vs GM_StageIV	0.363357	0.434867	1.31744	1.31744	GM_StageII up vs GM_StageV	0.605006	0.8498	0.863481	-1.1581	GM_StageIII down vs GM_StageIV	0.287591	0.839918	1.38246	1.38246	GM_StageIII up vs GM_StageV	0.128344	0.666777
OTU_17	0.416426	0.103246	0.834837	0.248472	0.913339	-1.09488	GM_StageI down vs GM_StageII	0.289515	0.29817	0.626722	-1.5956	GM_StageI down vs GM_StageIII	0.212029	0.133038	0.574749	-1.73989	GM_StageI down vs GM_StageIV	0.110907	0.162187	0.46743	-2.13936	GM_StageI down vs GM_StageV	0.390797	0.818789	0.686188	-1.45733	GM_StageII down vs GM_StageIII	0.293622	0.458	0.629283	-1.58911	GM_StageII down vs GM_StageIV	0.157197	0.338825	0.511781	-1.95396	GM_StageII down vs GM_StageV	0.84216	0.907158	0.917072	-1.09043	GM_StageIII down vs GM_StageIV	0.526806	0.942594	0.745833	-1.34078	GM_StageIII down vs GM_StageV	0.654684	0.970197
OTU_343	0.423031	0.104024	0.345214	0.141315	0.692858	-1.4433	GM_StageI down vs GM_StageII	0.573607	0.44847	1.24243	1.24243	GM_StageI up vs GM_StageIII	0.533856	0.251226	0.786471	-1.2715	GM_StageI down vs GM_StageIV	0.506383	0.388266	1.313	1.313	GM_StageI up vs GM_StageV	0.1399	0.787553	1.79319	1.79319	GM_StageII up vs GM_StageIII	0.741799	0.683385	1.13511	1.13511	GM_StageII up vs GM_StageIV	0.128355	0.337775	1.89505	1.89505	GM_StageII up vs GM_StageV	0.24251	0.716061	0.633012	-1.57975	GM_StageIII down vs GM_StageIV	0.892152	0.942594	1.0568	1.0568	GM_StageIII up vs GM_StageV	0.217779	0.771316
OTU_108	0.438803	0.105842	0.0887748	0.0583496	0.629868	-1.58763	GM_StageI down vs GM_StageII	0.202092	0.232247	0.711426	-1.40563	GM_StageI down vs GM_StageIII	0.424278	0.218982	0.810237	-1.23421	GM_StageI down vs GM_StageIV	0.691814	0.457843	0.895826	-1.11629	GM_StageI down vs GM_StageV	0.641946	0.9014	1.12948	1.12948	GM_StageII up vs GM_StageIII	0.340744	0.493538	1.28636	1.28636	GM_StageII up vs GM_StageIV	0.212964	0.401819	1.42224	1.42224	GM_StageII up vs GM_StageV	0.619572	0.8498	1.13889	1.13889	GM_StageIII up vs GM_StageIV	0.409584	0.920905	1.2592	1.2592	GM_StageIII up vs GM_StageV	0.717377	0.970197
OTU_52	0.44447	0.105842	0.541165	0.19839	0.831728	-1.20232	GM_StageI down vs GM_StageII	0.779197	0.519744	0.919244	-1.08785	GM_StageI down vs GM_StageIII	0.223607	0.137604	0.689002	-1.45137	GM_StageI down vs GM_StageIV	0.104557	0.158725	0.585459	-1.70806	GM_StageI down vs GM_StageV	0.739155	0.9014	1.10522	1.10522	GM_StageII up vs GM_StageIII	0.532484	0.568295	0.828398	-1.20715	GM_StageII down vs GM_StageIV	0.277513	0.420474	0.703906	-1.42064	GM_StageII down vs GM_StageV	0.342442	0.813401	0.749531	-1.33417	GM_StageIII down vs GM_StageIV	0.167112	0.726334	0.636891	-1.57013	GM_StageIII down vs GM_StageV	0.610074	0.970197
OTU_106	0.450037	0.105842	0.823498	0.248472	0.91344	-1.09476	GM_StageI down vs GM_StageII	0.29564	0.29817	0.650155	-1.5381	GM_StageI down vs GM_StageIII	0.389793	0.204482	0.703038	-1.4224	GM_StageI down vs GM_StageIV	0.482745	0.374093	1.35527	1.35527	GM_StageI up vs GM_StageV	0.406289	0.818789	0.711765	-1.40496	GM_StageII down vs GM_StageIII	0.520973	0.566791	0.76966	-1.29928	GM_StageII down vs GM_StageIV	0.36447	0.434867	1.4837	1.4837	GM_StageII up vs GM_StageV	0.847204	0.907158	1.08134	1.08134	GM_StageIII up vs GM_StageIV	0.0998656	0.645741	2.08453	2.08453	GM_StageIII up vs GM_StageV	0.13867	0.676762
OTU_423	0.462175	0.105842	1	0.281124	1	1	No change between GM_StageI and GM_StageII	1	0.574606	1	1	No change between GM_StageI and GM_StageIII	0.139782	0.0982682	0.782053	-1.27869	GM_StageI down vs GM_StageIV	1	0.546185	1	1	No change between GM_StageI and GM_StageV	1	0.926784	1	1	No change between GM_StageII and GM_StageIII	0.139782	0.347686	0.782053	-1.27869	GM_StageII down vs GM_StageIV	1	0.60241	1	1	No change between GM_StageII and GM_StageV	0.139782	0.553935	0.782053	-1.27869	GM_StageIII down vs GM_StageIV	1	0.942594	1	1	No change between GM_StageIII and GM_StageV	0.16255	0.686581
OTU_188	0.462175	0.105842	0.139782	0.0822513	1.16609	1.16609	GM_StageI up vs GM_StageII	0.139782	0.177774	1.16609	1.16609	GM_StageI up vs GM_StageIII	0.139782	0.0982682	1.16609	1.16609	GM_StageI up vs GM_StageIV	0.16255	0.181949	1.16609	1.16609	GM_StageI up vs GM_StageV	1	0.926784	1	1	No change between GM_StageII and GM_StageIII	1	0.732932	1	1	No change between GM_StageII and GM_StageIV	1	0.60241	1	1	No change between GM_StageII and GM_StageV	1	0.907158	1	1	No change between GM_StageIII and GM_StageIV	1	0.942594	1	1	No change between GM_StageIII and GM_StageV	1	0.970197
OTU_717	0.462175	0.105842	0.139782	0.0822513	1.25616	1.25616	GM_StageI up vs GM_StageII	0.139782	0.177774	1.25616	1.25616	GM_StageI up vs GM_StageIII	0.139782	0.0982682	1.25616	1.25616	GM_StageI up vs GM_StageIV	0.16255	0.181949	1.25616	1.25616	GM_StageI up vs GM_StageV	1	0.926784	1	1	No change between GM_StageII and GM_StageIII	1	0.732932	1	1	No change between GM_StageII and GM_StageIV	1	0.60241	1	1	No change between GM_StageII and GM_StageV	1	0.907158	1	1	No change between GM_StageIII and GM_StageIV	1	0.942594	1	1	No change between GM_StageIII and GM_StageV	1	0.970197
OTU_734	0.462175	0.105842	0.139782	0.0822513	1.66746	1.66746	GM_StageI up vs GM_StageII	0.139782	0.177774	1.66746	1.66746	GM_StageI up vs GM_StageIII	0.139782	0.0982682	1.66746	1.66746	GM_StageI up vs GM_StageIV	0.16255	0.181949	1.66746	1.66746	GM_StageI up vs GM_StageV	1	0.926784	1	1	No change between GM_StageII and GM_StageIII	1	0.732932	1	1	No change between GM_StageII and GM_StageIV	1	0.60241	1	1	No change between GM_StageII and GM_StageV	1	0.907158	1	1	No change between GM_StageIII and GM_StageIV	1	0.942594	1	1	No change between GM_StageIII and GM_StageV	1	0.970197
OTU_592	0.462175	0.105842	0.139782	0.0822513	0.53746	-1.8606	GM_StageI down vs GM_StageII	1	0.574606	1	1	No change between GM_StageI and GM_StageIII	1	0.385542	1	1	No change between GM_StageI and GM_StageIV	1	0.546185	1	1	No change between GM_StageI and GM_StageV	0.139782	0.787553	1.8606	1.8606	GM_StageII up vs GM_StageIII	0.139782	0.347686	1.8606	1.8606	GM_StageII up vs GM_StageIV	0.16255	0.338825	1.8606	1.8606	GM_StageII up vs GM_StageV	1	0.907158	1	1	No change between GM_StageIII and GM_StageIV	1	0.942594	1	1	No change between GM_StageIII and GM_StageV	1	0.970197
OTU_826	0.462175	0.105842	1	0.281124	1	1	No change between GM_StageI and GM_StageII	1	0.574606	1	1	No change between GM_StageI and GM_StageIII	0.139782	0.0982682	0.580263	-1.72336	GM_StageI down vs GM_StageIV	1	0.546185	1	1	No change between GM_StageI and GM_StageV	1	0.926784	1	1	No change between GM_StageII and GM_StageIII	0.139782	0.347686	0.580263	-1.72336	GM_StageII down vs GM_StageIV	1	0.60241	1	1	No change between GM_StageII and GM_StageV	0.139782	0.553935	0.580263	-1.72336	GM_StageIII down vs GM_StageIV	1	0.942594	1	1	No change between GM_StageIII and GM_StageV	0.16255	0.686581
OTU_125	0.471586	0.107179	0.122179	0.0777817	1.97101	1.97101	GM_StageI up vs GM_StageII	0.277731	0.294347	1.59788	1.59788	GM_StageI up vs GM_StageIII	0.106965	0.0824789	2.03336	2.03336	GM_StageI up vs GM_StageIV	0.249654	0.230973	1.69602	1.69602	GM_StageI up vs GM_StageV	0.622554	0.9014	0.810691	-1.23352	GM_StageII down vs GM_StageIII	0.941587	0.732932	1.03163	1.03163	GM_StageII up vs GM_StageIV	0.73923	0.532921	0.860479	-1.16214	GM_StageII down vs GM_StageV	0.572282	0.842839	1.27253	1.27253	GM_StageIII up vs GM_StageIV	0.894828	0.942594	1.06141	1.06141	GM_StageIII up vs GM_StageV	0.687987	0.970197
OTU_87	0.484531	0.109293	0.250707	0.124464	1.58872	1.58872	GM_StageI up vs GM_StageII	0.695213	0.484034	0.856047	-1.16816	GM_StageI down vs GM_StageIII	0.375893	0.198819	1.42517	1.42517	GM_StageI up vs GM_StageIV	0.42568	0.344598	1.40127	1.40127	GM_StageI up vs GM_StageV	0.130018	0.787553	0.538827	-1.85588	GM_StageII down vs GM_StageIII	0.783985	0.683385	0.897056	-1.11476	GM_StageII down vs GM_StageIV	0.765222	0.5348	0.882012	-1.13377	GM_StageII down vs GM_StageV	0.207626	0.665236	1.66483	1.66483	GM_StageIII up vs GM_StageIV	0.249035	0.839918	1.63691	1.63691	GM_StageIII up vs GM_StageV	0.967874	0.970197
OTU_157	0.496001	0.111045	0.998478	0.281124	1.00081	1.00081	GM_StageI up vs GM_StageII	0.237941	0.260872	0.600378	-1.66562	GM_StageI down vs GM_StageIII	0.452985	0.224737	0.725568	-1.37823	GM_StageI down vs GM_StageIV	0.640615	0.43671	1.23452	1.23452	GM_StageI up vs GM_StageV	0.237225	0.787553	0.599892	-1.66697	GM_StageII down vs GM_StageIII	0.451863	0.542628	0.724982	-1.37935	GM_StageII down vs GM_StageIV	0.641891	0.492982	1.23353	1.23353	GM_StageII up vs GM_StageV	0.656145	0.866734	1.20852	1.20852	GM_StageIII up vs GM_StageIV	0.121013	0.67625	2.05624	2.05624	GM_StageIII up vs GM_StageV	0.246117	0.828032
OTU_19	0.530273	0.117838	0.827239	0.248472	1.0694	1.0694	GM_StageI up vs GM_StageII	0.550462	0.433931	1.20242	1.20242	GM_StageI up vs GM_StageIII	0.175933	0.113734	1.53156	1.53156	GM_StageI up vs GM_StageIV	0.19832	0.202034	1.53528	1.53528	GM_StageI up vs GM_StageV	0.703342	0.9014	1.12438	1.12438	GM_StageII up vs GM_StageIII	0.250821	0.418035	1.43216	1.43216	GM_StageII up vs GM_StageIV	0.274888	0.420474	1.43564	1.43564	GM_StageII up vs GM_StageV	0.434792	0.833065	1.27373	1.27373	GM_StageIII up vs GM_StageIV	0.456694	0.92766	1.27683	1.27683	GM_StageIII up vs GM_StageV	0.994057	0.970197
OTU_49	0.552399	0.120715	0.527196	0.195258	1.16762	1.16762	GM_StageI up vs GM_StageII	0.226634	0.254322	1.35071	1.35071	GM_StageI up vs GM_StageIII	0.141261	0.0982682	1.44674	1.44674	GM_StageI up vs GM_StageIV	0.216945	0.211901	1.38528	1.38528	GM_StageI up vs GM_StageV	0.552052	0.9014	1.15681	1.15681	GM_StageII up vs GM_StageIII	0.384121	0.510104	1.23905	1.23905	GM_StageII up vs GM_StageIV	0.511019	0.473051	1.18641	1.18641	GM_StageII up vs GM_StageV	0.778372	0.89673	1.0711	1.0711	GM_StageIII up vs GM_StageIV	0.922153	0.942594	1.02559	1.02559	GM_StageIII up vs GM_StageV	0.866717	0.970197
OTU_100	0.556179	0.120715	0.72795	0.234283	1.16511	1.16511	GM_StageI up vs GM_StageII	0.629752	0.469214	0.808888	-1.23627	GM_StageI down vs GM_StageIII	0.449833	0.224737	0.716054	-1.39654	GM_StageI down vs GM_StageIV	0.229373	0.221239	0.565417	-1.76861	GM_StageI down vs GM_StageV	0.409705	0.818789	0.69426	-1.44038	GM_StageII down vs GM_StageIII	0.274746	0.445699	0.614582	-1.62712	GM_StageII down vs GM_StageIV	0.131812	0.33798	0.485292	-2.06062	GM_StageII down vs GM_StageV	0.781274	0.89673	0.885233	-1.12965	GM_StageIII down vs GM_StageIV	0.445017	0.92766	0.699006	-1.4306	GM_StageIII down vs GM_StageV	0.61287	0.970197
OTU_31	0.556522	0.120715	0.332878	0.140599	1.26342	1.26342	GM_StageI up vs GM_StageII	0.798372	0.521592	0.940859	-1.06286	GM_StageI down vs GM_StageIII	0.609596	0.280546	0.884987	-1.12996	GM_StageI down vs GM_StageIV	0.618763	0.425009	0.881384	-1.13458	GM_StageI down vs GM_StageV	0.225508	0.787553	0.744692	-1.34284	GM_StageII down vs GM_StageIII	0.146765	0.347686	0.700469	-1.42762	GM_StageII down vs GM_StageIV	0.165388	0.338825	0.697618	-1.43345	GM_StageII down vs GM_StageV	0.797534	0.89673	0.940615	-1.06313	GM_StageIII down vs GM_StageIV	0.796423	0.942594	0.936787	-1.06748	GM_StageIII down vs GM_StageV	0.987133	0.970197
OTU_47	0.566717	0.120715	0.841255	0.248472	1.09053	1.09053	GM_StageI up vs GM_StageII	0.635903	0.469214	0.814352	-1.22797	GM_StageI down vs GM_StageIII	0.180417	0.115467	0.552372	-1.81037	GM_StageI down vs GM_StageIV	0.723968	0.464291	0.850215	-1.17617	GM_StageI down vs GM_StageV	0.502109	0.887652	0.746749	-1.33914	GM_StageII down vs GM_StageIII	0.127512	0.347686	0.506517	-1.97427	GM_StageII down vs GM_StageIV	0.588812	0.479493	0.779634	-1.28265	GM_StageII down vs GM_StageV	0.374499	0.822044	0.678296	-1.47428	GM_StageIII down vs GM_StageIV	0.925156	0.942594	1.04404	1.04404	GM_StageIII up vs GM_StageV	0.352733	0.902064
OTU_164	0.566887	0.120715	0.311322	0.138183	0.80123	-1.24808	GM_StageI down vs GM_StageII	0.171935	0.202468	0.739014	-1.35315	GM_StageI down vs GM_StageIII	0.472468	0.229075	0.855406	-1.16904	GM_StageI down vs GM_StageIV	1	0.546185	1	1	No change between GM_StageI and GM_StageV	0.708597	0.9014	0.922349	-1.08419	GM_StageII down vs GM_StageIII	0.76211	0.683385	1.06761	1.06761	GM_StageII up vs GM_StageIV	0.339077	0.434867	1.24808	1.24808	GM_StageII up vs GM_StageV	0.500692	0.838473	1.1575	1.1575	GM_StageIII up vs GM_StageIV	0.196571	0.747732	1.35315	1.35315	GM_StageIII up vs GM_StageV	0.497836	0.956761
OTU_193	0.56736	0.120715	0.790029	0.247436	1.13178	1.13178	GM_StageI up vs GM_StageII	0.911037	0.573418	1.05328	1.05328	GM_StageI up vs GM_StageIII	0.231667	0.138899	0.567561	-1.76192	GM_StageI down vs GM_StageIV	0.903929	0.533864	1.06128	1.06128	GM_StageI up vs GM_StageV	0.877036	0.926784	0.930633	-1.07454	GM_StageII down vs GM_StageIII	0.1486	0.347686	0.501475	-1.99412	GM_StageII down vs GM_StageIV	0.896146	0.593474	0.937704	-1.06643	GM_StageII down vs GM_StageV	0.19325	0.649963	0.538853	-1.85579	GM_StageIII down vs GM_StageIV	0.987741	0.942594	1.0076	1.0076	GM_StageIII up vs GM_StageV	0.213466	0.771316
OTU_257	0.579301	0.122388	0.150792	0.0837733	0.589924	-1.69513	GM_StageI down vs GM_StageII	0.419947	0.36415	0.747805	-1.33725	GM_StageI down vs GM_StageIII	0.878291	0.351317	0.946755	-1.05624	GM_StageI down vs GM_StageIV	0.39831	0.331316	0.723909	-1.38139	GM_StageI down vs GM_StageV	0.509223	0.887652	1.26763	1.26763	GM_StageII up vs GM_StageIII	0.195445	0.37693	1.60488	1.60488	GM_StageII up vs GM_StageIV	0.590482	0.479493	1.22712	1.22712	GM_StageII up vs GM_StageV	0.511431	0.838473	1.26605	1.26605	GM_StageIII up vs GM_StageIV	0.931694	0.942594	0.968045	-1.03301	GM_StageIII down vs GM_StageV	0.481635	0.956761
OTU_158	0.601891	0.126271	0.520046	0.195258	0.79719	-1.25441	GM_StageI down vs GM_StageII	0.501774	0.409073	0.789151	-1.26718	GM_StageI down vs GM_StageIII	0.483427	0.232626	1.28042	1.28042	GM_StageI up vs GM_StageIV	0.848801	0.523523	1.07346	1.07346	GM_StageI up vs GM_StageV	0.976923	0.926784	0.989915	-1.01019	GM_StageII down vs GM_StageIII	0.18659	0.37693	1.60617	1.60617	GM_StageII up vs GM_StageIV	0.427287	0.440339	1.34656	1.34656	GM_StageII up vs GM_StageV	0.177767	0.649963	1.62253	1.62253	GM_StageIII up vs GM_StageIV	0.411984	0.920905	1.36028	1.36028	GM_StageIII up vs GM_StageV	0.636255	0.970197
OTU_149	0.624495	0.130103	0.717811	0.234115	1.19843	1.19843	GM_StageI up vs GM_StageII	0.949808	0.573418	0.969014	-1.03198	GM_StageI down vs GM_StageIII	0.640853	0.283321	0.791409	-1.26357	GM_StageI down vs GM_StageIV	0.252946	0.231654	0.539505	-1.85355	GM_StageI down vs GM_StageV	0.671605	0.9014	0.80857	-1.23675	GM_StageII down vs GM_StageIII	0.410871	0.520722	0.660372	-1.5143	GM_StageII down vs GM_StageIV	0.143769	0.338825	0.450176	-2.22135	GM_StageII down vs GM_StageV	0.686186	0.892968	0.816716	-1.22442	GM_StageIII down vs GM_StageIV	0.277138	0.839918	0.556756	-1.79612	GM_StageIII down vs GM_StageV	0.473066	0.956761
OTU_444	0.638336	0.131503	0.763304	0.242319	0.930628	-1.07454	GM_StageI down vs GM_StageII	0.520289	0.417039	1.16667	1.16667	GM_StageI up vs GM_StageIII	0.975904	0.380841	0.992824	-1.00723	GM_StageI down vs GM_StageIV	0.353987	0.302781	0.788868	-1.26764	GM_StageI down vs GM_StageV	0.348843	0.792117	1.25364	1.25364	GM_StageII up vs GM_StageIII	0.78636	0.683385	1.06683	1.06683	GM_StageII up vs GM_StageIV	0.515872	0.473051	0.847673	-1.1797	GM_StageII down vs GM_StageV	0.501213	0.838473	0.850988	-1.1751	GM_StageIII down vs GM_StageIV	0.133456	0.683654	0.67617	-1.47892	GM_StageIII down vs GM_StageV	0.368467	0.902064
OTU_8	0.639982	0.131503	0.59046	0.205633	1.13139	1.13139	GM_StageI up vs GM_StageII	0.180522	0.209988	1.36821	1.36821	GM_StageI up vs GM_StageIII	0.232222	0.138899	1.32086	1.32086	GM_StageI up vs GM_StageIV	0.61318	0.425009	1.13081	1.13081	GM_StageI up vs GM_StageV	0.409804	0.818789	1.20932	1.20932	GM_StageII up vs GM_StageIII	0.500598	0.562476	1.16747	1.16747	GM_StageII up vs GM_StageIV	0.998331	0.60241	0.999493	-1.00051	GM_StageII down vs GM_StageV	0.877532	0.907158	0.965393	-1.03585	GM_StageIII down vs GM_StageIV	0.435437	0.92766	0.826492	-1.20993	GM_StageIII down vs GM_StageV	0.523791	0.956761
OTU_237	0.665455	0.135807	0.325838	0.139502	0.601791	-1.66171	GM_StageI down vs GM_StageII	0.760562	0.510887	0.855843	-1.16844	GM_StageI down vs GM_StageIII	0.491955	0.234964	0.702693	-1.4231	GM_StageI down vs GM_StageIV	0.182156	0.196613	0.477319	-2.09504	GM_StageI down vs GM_StageV	0.492752	0.887652	1.42216	1.42216	GM_StageII up vs GM_StageIII	0.76154	0.683385	1.16767	1.16767	GM_StageII up vs GM_StageIV	0.669252	0.507009	0.793165	-1.26077	GM_StageII down vs GM_StageV	0.699724	0.892968	0.821054	-1.21795	GM_StageIII down vs GM_StageIV	0.287916	0.839918	0.557718	-1.79302	GM_StageIII down vs GM_StageV	0.477799	0.956761
OTU_112	0.670782	0.135969	0.975346	0.281124	1.01403	1.01403	GM_StageI up vs GM_StageII	0.334616	0.309876	1.55359	1.55359	GM_StageI up vs GM_StageIII	0.287776	0.164443	1.62694	1.62694	GM_StageI up vs GM_StageIV	0.935903	0.540479	1.03921	1.03921	GM_StageI up vs GM_StageV	0.349759	0.792117	1.53209	1.53209	GM_StageII up vs GM_StageIII	0.301394	0.464173	1.60443	1.60443	GM_StageII up vs GM_StageIV	0.959096	0.60241	1.02483	1.02483	GM_StageII up vs GM_StageV	0.918523	0.907158	1.04721	1.04721	GM_StageIII up vs GM_StageIV	0.404887	0.920905	0.66891	-1.49497	GM_StageIII down vs GM_StageV	0.354228	0.902064
OTU_282	0.686636	0.138249	0.268893	0.126928	1.78441	1.78441	GM_StageI up vs GM_StageII	0.424851	0.365083	1.51389	1.51389	GM_StageI up vs GM_StageIII	0.279411	0.161102	1.76144	1.76144	GM_StageI up vs GM_StageIV	0.193211	0.202034	2.06987	2.06987	GM_StageI up vs GM_StageV	0.749964	0.9014	0.848397	-1.17869	GM_StageII down vs GM_StageIII	0.979932	0.732932	0.987124	-1.01304	GM_StageII down vs GM_StageIV	0.786156	0.5348	1.15997	1.15997	GM_StageII up vs GM_StageV	0.769043	0.89673	1.16352	1.16352	GM_StageIII up vs GM_StageIV	0.568714	0.942594	1.36725	1.36725	GM_StageIII up vs GM_StageV	0.768036	0.970197
OTU_57	0.709244	0.141849	0.548408	0.19839	1.29201	1.29201	GM_StageI up vs GM_StageII	0.972303	0.574606	0.985358	-1.01486	GM_StageI down vs GM_StageIII	0.428548	0.219416	0.712356	-1.40379	GM_StageI down vs GM_StageIV	0.73646	0.46694	0.859095	-1.16402	GM_StageI down vs GM_StageV	0.52586	0.889027	0.762658	-1.3112	GM_StageII down vs GM_StageIII	0.171803	0.37693	0.551357	-1.81371	GM_StageII down vs GM_StageIV	0.370318	0.434867	0.664932	-1.50391	GM_StageII down vs GM_StageV	0.448577	0.833065	0.722941	-1.38324	GM_StageIII down vs GM_StageIV	0.76117	0.942594	0.871861	-1.14697	GM_StageIII down vs GM_StageV	0.678348	0.970197
OTU_2102	0.738124	0.146647	0.721457	0.234115	0.866193	-1.15448	GM_StageI down vs GM_StageII	0.527278	0.419118	1.29131	1.29131	GM_StageI up vs GM_StageIII	0.824768	0.340403	0.914735	-1.09321	GM_StageI down vs GM_StageIV	0.46665	0.36791	1.36724	1.36724	GM_StageI up vs GM_StageV	0.327129	0.792117	1.49078	1.49078	GM_StageII up vs GM_StageIII	0.892196	0.732932	1.05604	1.05604	GM_StageII up vs GM_StageIV	0.29192	0.434867	1.57845	1.57845	GM_StageII up vs GM_StageV	0.395964	0.822903	0.70838	-1.41167	GM_StageIII down vs GM_StageIV	0.893485	0.942594	1.0588	1.0588	GM_StageIII up vs GM_StageV	0.351807	0.902064
OTU_126	0.75631	0.149272	0.281728	0.127644	0.793745	-1.25985	GM_StageI down vs GM_StageII	0.468362	0.391882	0.857032	-1.16682	GM_StageI down vs GM_StageIII	0.448122	0.224737	0.850871	-1.17527	GM_StageI down vs GM_StageIV	1	0.546185	1	1	No change between GM_StageI and GM_StageV	0.716985	0.9014	1.07973	1.07973	GM_StageII up vs GM_StageIII	0.742532	0.683385	1.07197	1.07197	GM_StageII up vs GM_StageIV	0.309339	0.434867	1.25985	1.25985	GM_StageII up vs GM_StageV	0.972756	0.907158	0.992811	-1.00724	GM_StageIII down vs GM_StageIV	0.493844	0.933993	1.16682	1.16682	GM_StageIII up vs GM_StageV	0.474129	0.956761
OTU_62	0.81804	0.159271	0.670566	0.226761	0.813537	-1.2292	GM_StageI down vs GM_StageII	0.608155	0.462375	1.28275	1.28275	GM_StageI up vs GM_StageIII	0.725123	0.31009	1.18584	1.18584	GM_StageI up vs GM_StageIV	0.658876	0.442504	0.796757	-1.25509	GM_StageI down vs GM_StageV	0.352364	0.792117	1.57676	1.57676	GM_StageII up vs GM_StageIII	0.439891	0.542628	1.45764	1.45764	GM_StageII up vs GM_StageIV	0.967613	0.60241	0.979373	-1.02106	GM_StageII down vs GM_StageV	0.871099	0.907158	0.92445	-1.08172	GM_StageIII down vs GM_StageIV	0.359012	0.891663	0.62113	-1.60997	GM_StageIII down vs GM_StageV	0.442164	0.956761
OTU_67	0.821844	0.159271	0.490797	0.190865	1.35745	1.35745	GM_StageI up vs GM_StageII	0.918179	0.573418	0.955731	-1.04632	GM_StageI down vs GM_StageIII	0.621129	0.281931	0.803697	-1.24425	GM_StageI down vs GM_StageIV	0.966791	0.546185	1.01965	1.01965	GM_StageI up vs GM_StageV	0.429795	0.838686	0.704064	-1.42033	GM_StageII down vs GM_StageIII	0.242965	0.418035	0.592064	-1.68901	GM_StageII down vs GM_StageIV	0.542445	0.473051	0.751152	-1.33129	GM_StageII down vs GM_StageV	0.69482	0.892968	0.840924	-1.18917	GM_StageIII down vs GM_StageIV	0.889873	0.942594	1.06688	1.06688	GM_StageIII up vs GM_StageV	0.611881	0.970197
OTU_64	0.822903	0.159271	0.652474	0.222254	0.84289	-1.1864	GM_StageI down vs GM_StageII	0.688733	0.483048	1.1641	1.1641	GM_StageI up vs GM_StageIII	0.505392	0.239593	0.775994	-1.28867	GM_StageI down vs GM_StageIV	0.673127	0.448752	0.843859	-1.18503	GM_StageI down vs GM_StageV	0.398208	0.818789	1.38108	1.38108	GM_StageII up vs GM_StageIII	0.827177	0.698888	0.920636	-1.08621	GM_StageII down vs GM_StageIV	0.997716	0.60241	1.00115	1.00115	GM_StageII up vs GM_StageV	0.291218	0.797344	0.666604	-1.50014	GM_StageIII down vs GM_StageIV	0.426869	0.92766	0.724901	-1.3795	GM_StageIII down vs GM_StageV	0.834675	0.970197
OTU_426	0.83787	0.160131	0.344619	0.141315	1.5021	1.5021	GM_StageI up vs GM_StageII	0.947457	0.573418	1.02843	1.02843	GM_StageI up vs GM_StageIII	0.838715	0.341897	1.09049	1.09049	GM_StageI up vs GM_StageIV	0.509599	0.388266	1.34887	1.34887	GM_StageI up vs GM_StageV	0.378128	0.818789	0.684661	-1.46058	GM_StageII down vs GM_StageIII	0.454915	0.542628	0.725974	-1.37746	GM_StageII down vs GM_StageIV	0.811635	0.548402	0.897987	-1.1136	GM_StageII down vs GM_StageV	0.890469	0.907158	1.06034	1.06034	GM_StageIII up vs GM_StageIV	0.549633	0.942594	1.31158	1.31158	GM_StageIII up vs GM_StageV	0.638402	0.970197
OTU_46	0.838137	0.160131	0.505718	0.193572	0.701269	-1.42599	GM_StageI down vs GM_StageII	0.381211	0.343034	0.62565	-1.59834	GM_StageI down vs GM_StageIII	0.309037	0.17503	0.578817	-1.72766	GM_StageI down vs GM_StageIV	0.370339	0.310901	0.601026	-1.66382	GM_StageI down vs GM_StageV	0.829661	0.926784	0.892167	-1.12087	GM_StageII down vs GM_StageIII	0.717782	0.67177	0.825384	-1.21156	GM_StageII down vs GM_StageIV	0.784006	0.5348	0.857055	-1.16679	GM_StageII down vs GM_StageV	0.883332	0.907158	0.925146	-1.08091	GM_StageIII down vs GM_StageIV	0.943067	0.942594	0.960644	-1.04097	GM_StageIII down vs GM_StageV	0.946605	0.970197
OTU_127	0.846217	0.160131	0.617662	0.213513	0.78062	-1.28103	GM_StageI down vs GM_StageII	0.375518	0.34113	0.64218	-1.5572	GM_StageI down vs GM_StageIII	0.319607	0.177868	0.607267	-1.64672	GM_StageI down vs GM_StageIV	0.425633	0.344598	0.656094	-1.52417	GM_StageI down vs GM_StageV	0.693612	0.9014	0.822654	-1.21558	GM_StageII down vs GM_StageIII	0.612801	0.621312	0.777929	-1.28546	GM_StageII down vs GM_StageIV	0.74076	0.532921	0.840478	-1.1898	GM_StageII down vs GM_StageV	0.910011	0.907158	0.945633	-1.05749	GM_StageIII down vs GM_StageIV	0.967401	0.942594	1.02167	1.02167	GM_StageIII up vs GM_StageV	0.882812	0.970197
OTU_163	0.852554	0.160131	0.827539	0.248472	1.07671	1.07671	GM_StageI up vs GM_StageII	0.497937	0.409073	1.26013	1.26013	GM_StageI up vs GM_StageIII	0.949334	0.372745	0.978685	-1.02178	GM_StageI down vs GM_StageIV	0.407397	0.335794	1.35081	1.35081	GM_StageI up vs GM_StageV	0.643641	0.9014	1.17035	1.17035	GM_StageII up vs GM_StageIII	0.778522	0.683385	0.908957	-1.10016	GM_StageII down vs GM_StageIV	0.530448	0.473051	1.25457	1.25457	GM_StageII up vs GM_StageV	0.459294	0.833065	0.776654	-1.28757	GM_StageIII down vs GM_StageIV	0.846845	0.942594	1.07197	1.07197	GM_StageIII up vs GM_StageV	0.37527	0.902064
OTU_245	0.854031	0.160131	0.358609	0.145523	0.639654	-1.56335	GM_StageI down vs GM_StageII	0.676093	0.477695	0.817479	-1.22327	GM_StageI down vs GM_StageIII	0.33343	0.183961	0.624145	-1.60219	GM_StageI down vs GM_StageIV	0.598053	0.425009	0.763301	-1.3101	GM_StageI down vs GM_StageV	0.611475	0.9014	1.278	1.278	GM_StageII up vs GM_StageIII	0.959324	0.732932	0.975754	-1.02485	GM_StageII down vs GM_StageIV	0.729582	0.532921	1.1933	1.1933	GM_StageII up vs GM_StageV	0.576577	0.842839	0.763499	-1.30976	GM_StageIII down vs GM_StageIV	0.893154	0.942594	0.933725	-1.07098	GM_StageIII down vs GM_StageV	0.693947	0.970197
OTU_176	0.875842	0.16263	0.722412	0.234115	1.17203	1.17203	GM_StageI up vs GM_StageII	0.639493	0.469214	1.23315	1.23315	GM_StageI up vs GM_StageIII	0.938512	0.37077	1.03501	1.03501	GM_StageI up vs GM_StageIV	0.587473	0.422732	0.772822	-1.29396	GM_StageI down vs GM_StageV	0.909292	0.926784	1.05215	1.05215	GM_StageII up vs GM_StageIII	0.780702	0.683385	0.883093	-1.13238	GM_StageII down vs GM_StageIV	0.383657	0.434867	0.659386	-1.51656	GM_StageII down vs GM_StageV	0.695179	0.892968	0.839325	-1.19143	GM_StageIII down vs GM_StageIV	0.329568	0.859462	0.626705	-1.59565	GM_StageIII down vs GM_StageV	0.539044	0.956761
OTU_69	0.8782	0.16263	0.316775	0.138183	1.44832	1.44832	GM_StageI up vs GM_StageII	0.818538	0.52754	1.08742	1.08742	GM_StageI up vs GM_StageIII	0.731618	0.31009	1.13359	1.13359	GM_StageI up vs GM_StageIV	0.753358	0.471065	1.12954	1.12954	GM_StageI up vs GM_StageV	0.436117	0.838686	0.750814	-1.33189	GM_StageII down vs GM_StageIII	0.504632	0.562476	0.782695	-1.27764	GM_StageII down vs GM_StageIV	0.523105	0.473051	0.779901	-1.28221	GM_StageII down vs GM_StageV	0.909311	0.907158	1.04246	1.04246	GM_StageIII up vs GM_StageIV	0.921804	0.942594	1.03874	1.03874	GM_StageIII up vs GM_StageV	0.992629	0.970197
OTU_5	0.898031	0.164638	0.577955	0.202791	1.18995	1.18995	GM_StageI up vs GM_StageII	0.507652	0.410357	1.23053	1.23053	GM_StageI up vs GM_StageIII	0.35848	0.192796	1.33523	1.33523	GM_StageI up vs GM_StageIV	0.809559	0.50274	1.08288	1.08288	GM_StageI up vs GM_StageV	0.914224	0.926784	1.0341	1.0341	GM_StageII up vs GM_StageIII	0.711831	0.67177	1.12209	1.12209	GM_StageII up vs GM_StageIV	0.775452	0.5348	0.910027	-1.09887	GM_StageII down vs GM_StageV	0.79324	0.89673	1.08509	1.08509	GM_StageIII up vs GM_StageIV	0.699234	0.942594	0.880017	-1.13634	GM_StageIII down vs GM_StageV	0.527988	0.956761
OTU_448	0.900018	0.164638	0.800982	0.248472	1.10201	1.10201	GM_StageI up vs GM_StageII	0.854999	0.54734	0.932027	-1.07293	GM_StageI down vs GM_StageIII	0.613694	0.280546	0.822806	-1.21535	GM_StageI down vs GM_StageIV	0.537532	0.406135	0.776403	-1.28799	GM_StageI down vs GM_StageV	0.664277	0.9014	0.845748	-1.18239	GM_StageII down vs GM_StageIII	0.451417	0.542628	0.746638	-1.33934	GM_StageII down vs GM_StageIV	0.395729	0.434867	0.704531	-1.41938	GM_StageII down vs GM_StageV	0.746497	0.89673	0.882814	-1.13274	GM_StageIII down vs GM_StageIV	0.655491	0.942594	0.833027	-1.20044	GM_StageIII down vs GM_StageV	0.886999	0.970197
OTU_12	0.916856	0.166701	0.838624	0.248472	0.899749	-1.11142	GM_StageI down vs GM_StageII	0.49683	0.409073	0.701548	-1.42542	GM_StageI down vs GM_StageIII	0.929432	0.369464	0.955121	-1.04699	GM_StageI down vs GM_StageIV	0.479994	0.374093	0.676375	-1.47847	GM_StageI down vs GM_StageV	0.632307	0.9014	0.779715	-1.28252	GM_StageII down vs GM_StageIII	0.908304	0.732932	1.06154	1.06154	GM_StageII up vs GM_StageIV	0.605088	0.48407	0.751737	-1.33025	GM_StageII down vs GM_StageV	0.553615	0.842839	1.36145	1.36145	GM_StageIII up vs GM_StageIV	0.94702	0.942594	0.964118	-1.03722	GM_StageIII down vs GM_StageV	0.532439	0.956761
OTU_24	0.980512	0.177201	0.559973	0.200238	1.30123	1.30123	GM_StageI up vs GM_StageII	0.808373	0.524533	1.11532	1.11532	GM_StageI up vs GM_StageIII	0.860319	0.348484	1.08238	1.08238	GM_StageI up vs GM_StageIV	0.933648	0.540479	1.04051	1.04051	GM_StageI up vs GM_StageV	0.732127	0.9014	0.85713	-1.16668	GM_StageII down vs GM_StageIII	0.682838	0.659354	0.831813	-1.20219	GM_StageII down vs GM_StageIV	0.640195	0.492982	0.799637	-1.25057	GM_StageII down vs GM_StageV	0.946843	0.907158	0.970463	-1.03044	GM_StageIII down vs GM_StageIV	0.884292	0.942594	0.932924	-1.0719	GM_StageIII down vs GM_StageV	0.934088	0.970197
OTU_223					1	1	No change between GM_StageI and GM_StageII			1	1	No change between GM_StageI and GM_StageIII			1	1	No change between GM_StageI and GM_StageIV			1	1	No change between GM_StageI and GM_StageV			1	1	No change between GM_StageII and GM_StageIII			1	1	No change between GM_StageII and GM_StageIV			1	1	No change between GM_StageII and GM_StageV			1	1	No change between GM_StageIII and GM_StageIV			1	1	No change between GM_StageIII and GM_StageV
OTU_399					1	1	No change between GM_StageI and GM_StageII			1	1	No change between GM_StageI and GM_StageIII			1	1	No change between GM_StageI and GM_StageIV			1	1	No change between GM_StageI and GM_StageV			1	1	No change between GM_StageII and GM_StageIII			1	1	No change between GM_StageII and GM_StageIV			1	1	No change between GM_StageII and GM_StageV			1	1	No change between GM_StageIII and GM_StageIV			1	1	No change between GM_StageIII and GM_StageV
[truncated: 7 more columns]
