# Supplementary material for: Bt-modified transgenic rice shifted the composition and diversity of rhizosphere microbiota
Source: Preprints.org preprint supplement (doi:10.20944/preprints202402.1379.v1), 2024-02-23
Supplement: Supplementary file 11 [file Table S8.xlsx]

## Sheet: S8
Table S8 Statistical test of NonGM ACM OTUs from different rice developmental stages.
OTU ID	p-value(Treatment)	bonferroni(p-value(Treatment))	qvalue(p-value(Treatment))	p-value(NonGM_StageI vs. NonGM_StageII)	bonferroni(p-value(NonGM_StageI vs. NonGM_StageII))	qvalue(p-value(NonGM_StageI vs. NonGM_StageII))	Ratio(NonGM_StageI vs. NonGM_StageII)	Fold-Change(NonGM_StageI vs. NonGM_StageII)	Fold-Change(NonGM_StageI vs. NonGM_StageII) (Description)	p-value(NonGM_StageI vs. NonGM_StageIII)	bonferroni(p-value(NonGM_StageI vs. NonGM_StageIII))	qvalue(p-value(NonGM_StageI vs. NonGM_StageIII))	Ratio(NonGM_StageI vs. NonGM_StageIII)	Fold-Change(NonGM_StageI vs. NonGM_StageIII)	Fold-Change(NonGM_StageI vs. NonGM_StageIII) (Description)	p-value(NonGM_StageI vs. NonGM_StageIV)	bonferroni(p-value(NonGM_StageI vs. NonGM_StageIV))	qvalue(p-value(NonGM_StageI vs. NonGM_StageIV))	Ratio(NonGM_StageI vs. NonGM_StageIV)	Fold-Change(NonGM_StageI vs. NonGM_StageIV)	Fold-Change(NonGM_StageI vs. NonGM_StageIV) (Description)	p-value(NonGM_StageI vs. NonGM_StageV)	bonferroni(p-value(NonGM_StageI vs. NonGM_StageV))	qvalue(p-value(NonGM_StageI vs. NonGM_StageV))	Ratio(NonGM_StageI vs. NonGM_StageV)	Fold-Change(NonGM_StageI vs. NonGM_StageV)	Fold-Change(NonGM_StageI vs. NonGM_StageV) (Description)	p-value(NonGM_StageII vs. NonGM_StageIII)	bonferroni(p-value(NonGM_StageII vs. NonGM_StageIII))	qvalue(p-value(NonGM_StageII vs. NonGM_StageIII))	Ratio(NonGM_StageII vs. NonGM_StageIII)	Fold-Change(NonGM_StageII vs. NonGM_StageIII)	Fold-Change(NonGM_StageII vs. NonGM_StageIII) (Description)	p-value(NonGM_StageII vs. NonGM_StageIV)	bonferroni(p-value(NonGM_StageII vs. NonGM_StageIV))	qvalue(p-value(NonGM_StageII vs. NonGM_StageIV))	Ratio(NonGM_StageII vs. NonGM_StageIV)	Fold-Change(NonGM_StageII vs. NonGM_StageIV)	Fold-Change(NonGM_StageII vs. NonGM_StageIV) (Description)	p-value(NonGM_StageII vs. NonGM_StageV)	bonferroni(p-value(NonGM_StageII vs. NonGM_StageV))	qvalue(p-value(NonGM_StageII vs. NonGM_StageV))	Ratio(NonGM_StageII vs. NonGM_StageV)	Fold-Change(NonGM_StageII vs. NonGM_StageV)	Fold-Change(NonGM_StageII vs. NonGM_StageV) (Description)	p-value(NonGM_StageIII vs. NonGM_StageIV)	bonferroni(p-value(NonGM_StageIII vs. NonGM_StageIV))	qvalue(p-value(NonGM_StageIII vs. NonGM_StageIV))	Ratio(NonGM_StageIII vs. NonGM_StageIV)
OTU_2	1.19496e-06	0.000200753	3.4444e-05	1.21444e-05	0.00204026	0.00105251	1.9022	1.9022	NonGM_StageI up vs NonGM_StageII	1.16258e-06	0.000195314	9.55902e-05	2.15455	2.15455	NonGM_StageI up vs NonGM_StageIII	1.24137e-07	2.0855e-05	8.64524e-06	2.44961	2.44961	NonGM_StageI up vs NonGM_StageIV	0.00131068	0.220194	0.011158	1.5117	1.5117	NonGM_StageI up vs NonGM_StageV	0.243453	1	0.68889	1.13266	1.13266	NonGM_StageII up vs NonGM_StageIII	0.0244515	1	0.145097	1.28778	1.28778	NonGM_StageII up vs NonGM_StageIV	0.0387483	1	0.2145	0.794711	-1.25832	NonGM_StageII down vs NonGM_StageV	0.22998	1	0.726875	1.13694
OTU_3	1.56563e-06	0.000263027	3.4444e-05	0.00436378	0.733115	0.0363614	0.44079	-2.26865	NonGM_StageI down vs NonGM_StageII	1.60029e-05	0.00268848	0.000263158	0.234285	-4.26831	NonGM_StageI down vs NonGM_StageIII	2.3054e-07	3.87307e-05	8.64524e-06	0.137665	-7.26402	NonGM_StageI down vs NonGM_StageIV	1.7375e-06	0.0002919	0.000149425	0.178985	-5.58705	NonGM_StageI down vs NonGM_StageV	0.0159079	1	0.260082	0.531511	-1.88143	NonGM_StageII down vs NonGM_StageIII	0.000105499	0.0177239	0.00657341	0.312314	-3.20191	NonGM_StageII down vs NonGM_StageIV	0.00128267	0.215488	0.0568038	0.406055	-2.46272	NonGM_StageII down vs NonGM_StageV	0.0382572	1	0.38801	0.587597
OTU_368	1.16662e-05	0.00195991	0.000171104	0.000100604	0.0169014	0.0025565	3.9399	3.9399	NonGM_StageI up vs NonGM_StageII	1.0095e-05	0.00169597	0.000263158	5.2874	5.2874	NonGM_StageI up vs NonGM_StageIII	0.110674	1	0.11858	1.59792	1.59792	NonGM_StageI up vs NonGM_StageIV	1.0486e-05	0.00176165	0.0004509	5.26105	5.26105	NonGM_StageI up vs NonGM_StageV	0.279243	1	0.69092	1.34201	1.34201	NonGM_StageII up vs NonGM_StageIII	0.00289106	0.485698	0.047544	0.405575	-2.46564	NonGM_StageII down vs NonGM_StageIV	0.287239	1	0.528003	1.33532	1.33532	NonGM_StageII up vs NonGM_StageV	0.000228618	0.0384078	0.0349459	0.302214
OTU_102	1.73382e-05	0.00291281	0.00019072	0.0115717	1	0.0527832	0.419125	-2.38592	NonGM_StageI down vs NonGM_StageII	2.84266e-05	0.00477567	0.000347457	0.182515	-5.47899	NonGM_StageI down vs NonGM_StageIII	3.7142e-06	0.000623985	9.28549e-05	0.135548	-7.37744	NonGM_StageI down vs NonGM_StageIV	1.63196e-05	0.00274169	0.000467829	0.168562	-5.93253	NonGM_StageI down vs NonGM_StageV	0.0106251	1	0.235127	0.435468	-2.29638	NonGM_StageII down vs NonGM_StageIII	0.00108637	0.18251	0.0338445	0.323408	-3.09207	NonGM_StageII down vs NonGM_StageIV	0.00583941	0.981021	0.070528	0.402176	-2.48647	NonGM_StageII down vs NonGM_StageV	0.323363	1	0.782842	0.742668
OTU_28	6.23383e-05	0.0104728	0.000519836	0.00115828	0.194591	0.0143406	0.268745	-3.721	NonGM_StageI down vs NonGM_StageII	1.33825e-05	0.00224826	0.000263158	0.135329	-7.38942	NonGM_StageI down vs NonGM_StageIII	9.43477e-06	0.00158504	0.000176902	0.127919	-7.81745	NonGM_StageI down vs NonGM_StageIV	8.3984e-05	0.0141093	0.00144453	0.18053	-5.53926	NonGM_StageI down vs NonGM_StageV	0.0478745	1	0.440275	0.503558	-1.98587	NonGM_StageII down vs NonGM_StageIII	0.0337356	1	0.161691	0.475987	-2.1009	NonGM_StageII down vs NonGM_StageIV	0.234984	1	0.503536	0.671751	-1.48865	NonGM_StageII down vs NonGM_StageV	0.864025	1	0.920826	0.945246
OTU_22	8.01438e-05	0.0134642	0.000519836	0.030971	1	0.0834373	0.493074	-2.02809	NonGM_StageI down vs NonGM_StageII	6.21958e-06	0.00104489	0.000255694	0.15359	-6.51082	NonGM_StageI down vs NonGM_StageIII	0.000456411	0.076677	0.00228205	0.277299	-3.60621	NonGM_StageI down vs NonGM_StageIV	0.000250036	0.042006	0.00358385	0.255916	-3.90752	NonGM_StageI down vs NonGM_StageV	0.000642837	0.107997	0.0945889	0.311496	-3.21031	NonGM_StageII down vs NonGM_StageIII	0.0586426	1	0.228368	0.562389	-1.77813	NonGM_StageII down vs NonGM_StageIV	0.0334784	1	0.2145	0.519023	-1.9267	NonGM_StageII down vs NonGM_StageV	0.0528345	1	0.38801	1.80544
OTU_26	8.69653e-05	0.0146102	0.000519836	0.000283527	0.0476325	0.00491446	0.217585	-4.59591	NonGM_StageI down vs NonGM_StageII	2.95808e-05	0.00496958	0.000347457	0.153696	-6.50637	NonGM_StageI down vs NonGM_StageIII	0.000339782	0.0570833	0.00182026	0.223621	-4.47186	NonGM_StageI down vs NonGM_StageIV	0.194765	1	0.232637	0.629959	-1.5874	NonGM_StageI down vs NonGM_StageV	0.296979	1	0.693624	0.70637	-1.41569	NonGM_StageII down vs NonGM_StageIII	0.933613	1	0.745786	1.02774	1.02774	NonGM_StageII up vs NonGM_StageIV	0.0039429	0.662407	0.0582047	2.89523	2.89523	NonGM_StageII up vs NonGM_StageV	0.261693	1	0.729702	1.45496
OTU_36	9.55255e-05	0.0160483	0.000519836	0.4275	1	0.346262	1.16001	1.16001	NonGM_StageI up vs NonGM_StageII	0.00536479	0.901284	0.0242938	1.77751	1.77751	NonGM_StageI up vs NonGM_StageIII	1.45946e-05	0.00245189	0.000218919	2.87698	2.87698	NonGM_StageI up vs NonGM_StageIV	0.0657272	1	0.115358	1.42973	1.42973	NonGM_StageI up vs NonGM_StageV	0.0230198	1	0.33872	1.53232	1.53232	NonGM_StageII up vs NonGM_StageIII	4.43497e-05	0.00745074	0.00552665	2.48013	2.48013	NonGM_StageII up vs NonGM_StageIV	0.240635	1	0.507462	1.23251	1.23251	NonGM_StageII up vs NonGM_StageV	0.011675	1	0.254944	1.61854
OTU_159	0.00010633	0.0178634	0.000519836	0.0464324	1	0.108761	0.480523	-2.08106	NonGM_StageI down vs NonGM_StageII	4.54067e-05	0.00762833	0.000447696	0.164168	-6.09133	NonGM_StageI down vs NonGM_StageIII	2.44537e-05	0.00410822	0.000305671	0.148985	-6.71209	NonGM_StageI down vs NonGM_StageIV	0.00627448	1	0.0337254	0.347553	-2.87726	NonGM_StageI down vs NonGM_StageV	0.00367138	0.616792	0.235127	0.341644	-2.92702	NonGM_StageII down vs NonGM_StageIII	0.00186375	0.313109	0.0464503	0.310047	-3.22532	NonGM_StageII down vs NonGM_StageIV	0.330445	1	0.556269	0.723281	-1.38259	NonGM_StageII down vs NonGM_StageV	0.768036	1	0.896232	0.907515
OTU_1173	0.000187034	0.0314217	0.000822949	6.48311e-05	0.0108916	0.0025565	1.95923	1.95923	NonGM_StageI up vs NonGM_StageII	6.48311e-05	0.0108916	0.000533056	1.95923	1.95923	NonGM_StageI up vs NonGM_StageIII	6.48311e-05	0.0108916	0.000540259	1.95923	1.95923	NonGM_StageI up vs NonGM_StageIV	6.48311e-05	0.0108916	0.00139387	1.95923	1.95923	NonGM_StageI up vs NonGM_StageV	1	1	0.886403	1	1	No change between NonGM_StageII and NonGM_StageIII	1	1	0.750695	1	1	No change between NonGM_StageII and NonGM_StageIV	1	1	0.800344	1	1	No change between NonGM_StageII and NonGM_StageV	1	1	0.920826	1
OTU_20	0.000207669	0.0348885	0.000830677	0.00469523	0.788799	0.0363614	0.283538	-3.52687	NonGM_StageI down vs NonGM_StageII	4.90046e-05	0.00823277	0.000447696	0.128224	-7.79882	NonGM_StageI down vs NonGM_StageIII	3.04296e-05	0.00511218	0.000326032	0.11775	-8.49257	NonGM_StageI down vs NonGM_StageIV	0.0100036	1	0.0427018	0.324275	-3.0838	NonGM_StageI down vs NonGM_StageV	0.045713	1	0.440275	0.452231	-2.21126	NonGM_StageII down vs NonGM_StageIII	0.0286593	1	0.148808	0.415289	-2.40796	NonGM_StageII down vs NonGM_StageIV	0.721557	1	0.758187	1.14368	1.14368	NonGM_StageII up vs NonGM_StageV	0.820848	1	0.896232	0.918311
OTU_161	0.000432396	0.0726425	0.00158545	0.000117992	0.0198227	0.0025565	0.221946	-4.5056	NonGM_StageI down vs NonGM_StageII	0.00141303	0.237389	0.00968187	0.312047	-3.20465	NonGM_StageI down vs NonGM_StageIII	0.00254855	0.428157	0.00955707	0.338343	-2.95558	NonGM_StageI down vs NonGM_StageIV	0.345587	1	0.288548	0.739461	-1.35234	NonGM_StageI down vs NonGM_StageV	0.261192	1	0.69092	1.40596	1.40596	NonGM_StageII up vs NonGM_StageIII	0.168096	1	0.410731	1.52444	1.52444	NonGM_StageII up vs NonGM_StageIV	0.000623151	0.104689	0.041395	3.33172	3.33172	NonGM_StageII up vs NonGM_StageV	0.786293	1	0.896232	1.08427
OTU_5	0.000871644	0.146436	0.00295018	0.105563	1	0.176914	1.98739	1.98739	NonGM_StageI up vs NonGM_StageII	0.142348	1	0.18578	1.85635	1.85635	NonGM_StageI up vs NonGM_StageIII	9.98008e-05	0.0167665	0.000748506	7.24077	7.24077	NonGM_StageI up vs NonGM_StageIV	0.430833	1	0.330818	1.38446	1.38446	NonGM_StageI up vs NonGM_StageV	0.859826	1	0.886403	0.934063	-1.07059	NonGM_StageII down vs NonGM_StageIII	0.00305221	0.512771	0.047544	3.64336	3.64336	NonGM_StageII up vs NonGM_StageIV	0.354672	1	0.574642	0.696623	-1.4355	NonGM_StageII down vs NonGM_StageV	0.00203376	0.341672	0.0777188	3.90055
OTU_68	0.00104452	0.17548	0.00321399	0.0156282	1	0.0593383	2.314	2.314	NonGM_StageI up vs NonGM_StageII	0.0602611	1	0.12616	1.87999	1.87999	NonGM_StageI up vs NonGM_StageIII	5.18166e-05	0.0087052	0.000485781	5.15897	5.15897	NonGM_StageI up vs NonGM_StageIV	0.00445737	0.748839	0.027381	2.77054	2.77054	NonGM_StageI up vs NonGM_StageV	0.494113	1	0.773459	0.812443	-1.23085	NonGM_StageII down vs NonGM_StageIII	0.0144593	1	0.13797	2.22946	2.22946	NonGM_StageII up vs NonGM_StageIV	0.552715	1	0.673689	1.19729	1.19729	NonGM_StageII up vs NonGM_StageV	0.00308382	0.518082	0.0942767	2.74415
OTU_259	0.00109568	0.184074	0.00321399	0.00414309	0.696039	0.0363614	0.369404	-2.70706	NonGM_StageI down vs NonGM_StageII	0.00192895	0.324063	0.0105735	0.333161	-3.00155	NonGM_StageI down vs NonGM_StageIII	0.00483319	0.811976	0.0144996	0.377238	-2.65085	NonGM_StageI down vs NonGM_StageIV	1	1	0.518072	1	1	No change between NonGM_StageI and NonGM_StageV	0.724089	1	0.867209	0.901888	-1.10878	NonGM_StageII down vs NonGM_StageIII	0.94272	1	0.748264	1.02121	1.02121	NonGM_StageII up vs NonGM_StageIV	0.00265197	0.44553	0.0582047	2.70706	2.70706	NonGM_StageII up vs NonGM_StageV	0.67126	1	0.884542	1.1323
OTU_45	0.00214754	0.360786	0.00590573	0.843185	1	0.477603	1.06822	1.06822	NonGM_StageI up vs NonGM_StageII	0.0758244	1	0.130421	0.539029	-1.85519	NonGM_StageI down vs NonGM_StageIII	0.000856181	0.143838	0.00377727	0.27245	-3.6704	NonGM_StageI down vs NonGM_StageIV	0.0480066	1	0.0960132	0.498817	-2.00474	NonGM_StageI down vs NonGM_StageV	0.0400099	1	0.420512	0.504605	-1.98175	NonGM_StageII down vs NonGM_StageIII	0.000305079	0.0512533	0.0126725	0.25505	-3.9208	NonGM_StageII down vs NonGM_StageIV	0.0239235	1	0.176578	0.46696	-2.14151	NonGM_StageII down vs NonGM_StageV	0.0404455	1	0.38801	0.505446
OTU_6	0.00252058	0.423457	0.00652384	0.0248805	1	0.0718771	0.389329	-2.56852	NonGM_StageI down vs NonGM_StageII	0.00294654	0.495018	0.0142512	0.267105	-3.74384	NonGM_StageI down vs NonGM_StageIII	0.000227455	0.0382124	0.00139929	0.172801	-5.78699	NonGM_StageI down vs NonGM_StageIV	0.0010056	0.16894	0.00987074	0.222451	-4.49538	NonGM_StageI down vs NonGM_StageV	0.315081	1	0.709771	0.686065	-1.45759	NonGM_StageII down vs NonGM_StageIII	0.0384244	1	0.169745	0.443844	-2.25304	NonGM_StageII down vs NonGM_StageIV	0.141784	1	0.419466	0.571369	-1.75018	NonGM_StageII down vs NonGM_StageV	0.247671	1	0.729702	0.646942
OTU_44	0.00292653	0.491657	0.00715374	0.1122	1	0.176914	0.638709	-1.56566	NonGM_StageI down vs NonGM_StageII	0.269752	1	0.264158	0.736398	-1.35796	NonGM_StageI down vs NonGM_StageIII	0.000225683	0.0379148	0.00139929	0.294919	-3.39076	NonGM_StageI down vs NonGM_StageIV	0.0863261	1	0.137482	0.614546	-1.62722	NonGM_StageI down vs NonGM_StageV	0.581461	1	0.822672	1.15295	1.15295	NonGM_StageII up vs NonGM_StageIII	0.00666085	1	0.0830044	0.461743	-2.16571	NonGM_StageII down vs NonGM_StageIV	0.880812	1	0.796918	0.962169	-1.03932	NonGM_StageII down vs NonGM_StageV	0.00188277	0.316305	0.0777188	0.400489
OTU_512	0.00340105	0.571376	0.00777238	0.905338	1	0.496599	0.978566	-1.0219	NonGM_StageI down vs NonGM_StageII	0.153688	1	0.194408	1.30624	1.30624	NonGM_StageI up vs NonGM_StageIII	0.00842932	1	0.0230778	1.69608	1.69608	NonGM_StageI up vs NonGM_StageIV	0.258218	1	0.266876	0.810953	-1.23312	NonGM_StageI down vs NonGM_StageV	0.104689	1	0.638685	1.33485	1.33485	NonGM_StageII up vs NonGM_StageIII	0.00426334	0.71624	0.0590308	1.73323	1.73323	NonGM_StageII up vs NonGM_StageIV	0.281511	1	0.528003	0.828716	-1.20669	NonGM_StageII down vs NonGM_StageV	0.139847	1	0.6661	1.29845
OTU_94	0.0035329	0.593527	0.00777238	0.464096	1	0.350415	0.777476	-1.28621	NonGM_StageI down vs NonGM_StageII	0.347236	1	0.286815	0.722757	-1.38359	NonGM_StageI down vs NonGM_StageIII	0.000764496	0.128435	0.00358357	0.259815	-3.84889	NonGM_StageI down vs NonGM_StageIV	0.0135377	1	0.0513004	0.39977	-2.50144	NonGM_StageI down vs NonGM_StageV	0.820713	1	0.886403	0.929619	-1.07571	NonGM_StageII down vs NonGM_StageIII	0.00267592	0.449554	0.047544	0.334178	-2.99242	NonGM_StageII down vs NonGM_StageIV	0.0498688	1	0.228463	0.514189	-1.94481	NonGM_StageII down vs NonGM_StageV	0.00449358	0.754921	0.114479	0.359478
OTU_16	0.0037613	0.631898	0.00788081	0.0100512	1	0.0483947	0.408017	-2.45088	NonGM_StageI down vs NonGM_StageII	0.00166036	0.278941	0.00978691	0.31723	-3.15228	NonGM_StageI down vs NonGM_StageIII	0.000242543	0.0407472	0.00139929	0.24349	-4.10694	NonGM_StageI down vs NonGM_StageIV	0.0173413	1	0.0599506	0.441578	-2.26461	NonGM_StageI down vs NonGM_StageV	0.405233	1	0.745339	0.777493	-1.28619	NonGM_StageII down vs NonGM_StageIII	0.0969553	1	0.326544	0.596765	-1.6757	NonGM_StageII down vs NonGM_StageIV	0.792081	1	0.765039	1.08225	1.08225	NonGM_StageII up vs NonGM_StageV	0.3821	1	0.782842	0.76755
OTU_30	0.00422833	0.71036	0.00845667	0.0436257	1	0.107443	1.83531	1.83531	NonGM_StageI up vs NonGM_StageII	0.00233455	0.392204	0.011997	2.68155	2.68155	NonGM_StageI up vs NonGM_StageIII	0.0856033	1	0.0987731	1.66431	1.66431	NonGM_StageI up vs NonGM_StageIV	0.000418877	0.0703714	0.00514621	3.31345	3.31345	NonGM_StageI up vs NonGM_StageV	0.168485	1	0.681253	1.46108	1.46108	NonGM_StageII up vs NonGM_StageIII	0.715995	1	0.709716	0.906824	-1.10275	NonGM_StageII down vs NonGM_StageIV	0.0379598	1	0.2145	1.80539	1.80539	NonGM_StageII up vs NonGM_StageV	0.0876047	1	0.557958	0.620651
OTU_100	0.0044559	0.748592	0.00852433	0.576893	1	0.384595	0.792267	-1.2622	NonGM_StageI down vs NonGM_StageII	0.103608	1	0.160733	0.49595	-2.01633	NonGM_StageI down vs NonGM_StageIII	0.00893037	1	0.0230958	0.302811	-3.30239	NonGM_StageI down vs NonGM_StageIV	0.00103298	0.173541	0.00987074	0.204523	-4.88944	NonGM_StageI down vs NonGM_StageV	0.240647	1	0.68889	0.625989	-1.59747	NonGM_StageII down vs NonGM_StageIII	0.022343	1	0.145097	0.382208	-2.61638	NonGM_StageII down vs NonGM_StageIV	0.00238571	0.4008	0.0582047	0.258148	-3.87374	NonGM_StageII down vs NonGM_StageV	0.217417	1	0.722472	0.610567
OTU_154	0.00623926	1	0.0113601	0.00797464	1	0.043196	0.415833	-2.40481	NonGM_StageI down vs NonGM_StageII	0.850339	1	0.454751	0.944945	-1.05826	NonGM_StageI down vs NonGM_StageIII	0.448091	1	0.28377	0.795061	-1.25777	NonGM_StageI down vs NonGM_StageIV	0.290559	1	0.274595	1.3797	1.3797	NonGM_StageI up vs NonGM_StageV	0.00839147	1	0.235127	2.27241	2.27241	NonGM_StageII up vs NonGM_StageIII	0.0314975	1	0.157003	1.91197	1.91197	NonGM_StageII up vs NonGM_StageIV	0.000389255	0.0653948	0.041395	3.31793	3.31793	NonGM_StageII up vs NonGM_StageV	0.543434	1	0.878065	0.841383
OTU_15	0.0064546	1	0.0113601	0.0233284	1	0.0718771	2.21756	2.21756	NonGM_StageI up vs NonGM_StageII	0.00166642	0.279959	0.00978691	3.25972	3.25972	NonGM_StageI up vs NonGM_StageIII	0.00101227	0.170062	0.00421781	3.498	3.498	NonGM_StageI up vs NonGM_StageIV	0.103569	1	0.159052	1.73691	1.73691	NonGM_StageI up vs NonGM_StageV	0.221007	1	0.681253	1.46996	1.46996	NonGM_StageII up vs NonGM_StageIII	0.150768	1	0.408352	1.57741	1.57741	NonGM_StageII up vs NonGM_StageIV	0.432189	1	0.623158	0.783253	-1.27673	NonGM_StageII down vs NonGM_StageV	0.819209	1	0.896232	1.0731
OTU_152	0.00901274	1	0.0150034	0.00775012	1	0.043196	0.3665	-2.72851	NonGM_StageI down vs NonGM_StageII	0.00561385	0.943126	0.0242938	0.348993	-2.86539	NonGM_StageI down vs NonGM_StageIII	0.0013012	0.218601	0.0051363	0.280667	-3.56294	NonGM_StageI down vs NonGM_StageIV	0.00142719	0.239767	0.011158	0.284528	-3.51459	NonGM_StageI down vs NonGM_StageV	0.879261	1	0.886403	0.952231	-1.05017	NonGM_StageII down vs NonGM_StageIII	0.411727	1	0.554506	0.765803	-1.30582	NonGM_StageII down vs NonGM_StageIV	0.43567	1	0.623158	0.776337	-1.2881	NonGM_StageII down vs NonGM_StageV	0.501398	1	0.85461	0.80422
OTU_92	0.0094938	1	0.0150034	0.000559923	0.0940671	0.00808778	4.39943	4.39943	NonGM_StageI up vs NonGM_StageII	0.0619743	1	0.12616	2.03435	2.03435	NonGM_StageI up vs NonGM_StageIII	0.0132118	1	0.0275246	2.66081	2.66081	NonGM_StageI up vs NonGM_StageIV	0.0104272	1	0.0427018	2.7665	2.7665	NonGM_StageI up vs NonGM_StageV	0.0340022	1	0.416932	0.462412	-2.16257	NonGM_StageII down vs NonGM_StageIII	0.152771	1	0.408352	0.604807	-1.65342	NonGM_StageII down vs NonGM_StageIV	0.185403	1	0.43986	0.628831	-1.59025	NonGM_StageII down vs NonGM_StageV	0.436325	1	0.784652	1.30794
OTU_72	0.00954764	1	0.0150034	0.00727884	1	0.043196	0.373622	-2.6765	NonGM_StageI down vs NonGM_StageII	0.000950993	0.159767	0.00710844	0.278188	-3.59469	NonGM_StageI down vs NonGM_StageIII	0.00471081	0.791417	0.0144996	0.350476	-2.85326	NonGM_StageI down vs NonGM_StageIV	0.00281874	0.473549	0.0186471	0.325264	-3.07443	NonGM_StageI down vs NonGM_StageV	0.351618	1	0.709771	0.744571	-1.34306	NonGM_StageII down vs NonGM_StageIII	0.838175	1	0.73556	0.93805	-1.06604	NonGM_StageII down vs NonGM_StageIV	0.658689	1	0.735392	0.87057	-1.14867	NonGM_StageII down vs NonGM_StageV	0.463703	1	0.824189	1.25985
OTU_177	0.0104478	1	0.0158428	0.00545422	0.916308	0.0363614	3.76112	3.76112	NonGM_StageI up vs NonGM_StageII	0.139692	1	0.185255	1.91821	1.91821	NonGM_StageI up vs NonGM_StageIII	0.0303304	1	0.0473912	2.68848	2.68848	NonGM_StageI up vs NonGM_StageIV	0.873213	1	0.496035	0.933933	-1.07074	NonGM_StageI down vs NonGM_StageV	0.107365	1	0.638685	0.510011	-1.96074	NonGM_StageII down vs NonGM_StageIII	0.409882	1	0.554506	0.714809	-1.39897	NonGM_StageII down vs NonGM_StageIV	0.00241413	0.405574	0.0582047	0.248312	-4.02718	NonGM_StageII down vs NonGM_StageV	0.407362	1	0.782842	1.40156
OTU_25	0.0108019	1	0.0158428	0.0317703	1	0.0834373	0.549595	-1.81952	NonGM_StageI down vs NonGM_StageII	0.00777544	1	0.0319657	0.463769	-2.15625	NonGM_StageI down vs NonGM_StageIII	0.00293266	0.492686	0.0104738	0.414446	-2.41286	NonGM_StageI down vs NonGM_StageIV	0.475421	1	0.345081	0.828585	-1.20688	NonGM_StageI down vs NonGM_StageV	0.494022	1	0.773459	0.843838	-1.18506	NonGM_StageII down vs NonGM_StageIII	0.260743	1	0.473516	0.754093	-1.3261	NonGM_StageII down vs NonGM_StageIV	0.108125	1	0.377843	1.50763	1.50763	NonGM_StageII up vs NonGM_StageV	0.649453	1	0.884542	0.893647
OTU_2351	0.0163624	1	0.0230927	0.925779	1	0.504617	1.03495	1.03495	NonGM_StageI up vs NonGM_StageII	0.194258	1	0.218799	0.612844	-1.63174	NonGM_StageI down vs NonGM_StageIII	0.0380703	1	0.0538731	0.444355	-2.25045	NonGM_StageI down vs NonGM_StageIV	0.00714877	1	0.0361644	0.334057	-2.9935	NonGM_StageI down vs NonGM_StageV	0.143139	1	0.679416	0.592151	-1.68876	NonGM_StageII down vs NonGM_StageIII	0.0234256	1	0.145097	0.42935	-2.3291	NonGM_StageII down vs NonGM_StageIV	0.00379803	0.638069	0.0582047	0.322777	-3.09812	NonGM_StageII down vs NonGM_StageV	0.360463	1	0.782842	0.725069
OTU_64	0.0167947	1	0.0230927	0.748241	1	0.443713	0.893434	-1.11928	NonGM_StageI down vs NonGM_StageII	0.324949	1	0.272633	0.704935	-1.41857	NonGM_StageI down vs NonGM_StageIII	0.0263032	1	0.0424932	2.30153	2.30153	NonGM_StageI up vs NonGM_StageIV	0.667908	1	0.416232	0.860032	-1.16275	NonGM_StageI down vs NonGM_StageV	0.476454	1	0.770405	0.789018	-1.2674	NonGM_StageII down vs NonGM_StageIII	0.00916595	1	0.103838	2.57605	2.57605	NonGM_StageII up vs NonGM_StageIV	0.908245	1	0.800344	0.962614	-1.03884	NonGM_StageII down vs NonGM_StageV	0.00179462	0.301496	0.0777188	3.26488
OTU_426	0.0219728	1	0.0292971	0.640757	1	0.417536	1.15946	1.15946	NonGM_StageI up vs NonGM_StageII	0.096499	1	0.155576	0.579517	-1.72557	NonGM_StageI down vs NonGM_StageIII	0.550355	1	0.310877	1.2089	1.2089	NonGM_StageI up vs NonGM_StageIV	0.0466406	1	0.0955022	0.514811	-1.94246	NonGM_StageI down vs NonGM_StageV	0.0292659	1	0.391478	0.499818	-2.00073	NonGM_StageII down vs NonGM_StageIII	0.888605	1	0.745786	1.04264	1.04264	NonGM_StageII up vs NonGM_StageIV	0.012458	1	0.137928	0.444011	-2.2522	NonGM_StageII down vs NonGM_StageV	0.0217586	1	0.36955	2.08605
OTU_69	0.0238698	1	0.0301904	0.00423581	0.711616	0.0363614	2.16555	2.16555	NonGM_StageI up vs NonGM_StageII	0.0098182	1	0.0384416	1.97913	1.97913	NonGM_StageI up vs NonGM_StageIII	0.00345878	0.581076	0.0117913	2.21242	2.21242	NonGM_StageI up vs NonGM_StageIV	0.0286017	1	0.0787862	1.75692	1.75692	NonGM_StageI up vs NonGM_StageV	0.692665	1	0.856477	0.913914	-1.0942	NonGM_StageII down vs NonGM_StageIII	0.924954	1	0.745786	1.02164	1.02164	NonGM_StageII up vs NonGM_StageIV	0.362903	1	0.580077	0.811303	-1.23258	NonGM_StageII down vs NonGM_StageV	0.62505	1	0.884542	1.11788
OTU_390	0.0240151	1	0.0301904	0.0655579	1	0.130249	0.489764	-2.0418	NonGM_StageI down vs NonGM_StageII	0.489498	1	0.338215	0.773026	-1.29362	NonGM_StageI down vs NonGM_StageIII	0.00981053	1	0.0245263	0.350555	-2.85262	NonGM_StageI down vs NonGM_StageIV	0.928993	1	0.505655	1.03354	1.03354	NonGM_StageI up vs NonGM_StageV	0.20082	1	0.681253	1.57836	1.57836	NonGM_StageII up vs NonGM_StageIII	0.343745	1	0.511376	0.715763	-1.39711	NonGM_StageII down vs NonGM_StageIV	0.0430203	1	0.221777	2.11027	2.11027	NonGM_StageII up vs NonGM_StageV	0.0332095	1	0.38801	0.453485
OTU_17	0.0267315	1	0.0320631	0.123673	1	0.18244	0.580928	-1.72138	NonGM_StageI down vs NonGM_StageII	0.0187184	1	0.0620262	0.420341	-2.37902	NonGM_StageI down vs NonGM_StageIII	0.0124527	1	0.0266844	0.394307	-2.5361	NonGM_StageI down vs NonGM_StageIV	0.00272443	0.457704	0.0186471	0.313217	-3.19267	NonGM_StageI down vs NonGM_StageV	0.3215	1	0.709771	0.723569	-1.38204	NonGM_StageII down vs NonGM_StageIII	0.237734	1	0.467539	0.678753	-1.47329	NonGM_StageII down vs NonGM_StageIV	0.0669325	1	0.277889	0.539167	-1.85471	NonGM_StageII down vs NonGM_StageV	0.842719	1	0.913585	0.938063
OTU_423	0.0269621	1	0.0320631	0.172171	1	0.216254	0.684484	-1.46096	NonGM_StageI down vs NonGM_StageII	0.280894	1	0.264158	0.743366	-1.34523	NonGM_StageI down vs NonGM_StageIII	1	1	0.451807	1	1	No change between NonGM_StageI and NonGM_StageIV	0.00610296	1	0.0337254	0.438598	-2.27999	NonGM_StageI down vs NonGM_StageV	0.746814	1	0.867209	1.08602	1.08602	NonGM_StageII up vs NonGM_StageIII	0.148819	1	0.408352	1.46096	1.46096	NonGM_StageII up vs NonGM_StageIV	0.0933307	1	0.375747	0.640772	-1.56062	NonGM_StageII down vs NonGM_StageV	0.253643	1	0.729702	1.34523
OTU_163	0.0298772	1	0.0343698	0.126946	1	0.183367	1.67662	1.67662	NonGM_StageI up vs NonGM_StageII	0.257556	1	0.259573	1.45922	1.45922	NonGM_StageI up vs NonGM_StageIII	0.265608	1	0.201218	1.44971	1.44971	NonGM_StageI up vs NonGM_StageIV	0.166958	1	0.211152	0.627967	-1.59244	NonGM_StageI down vs NonGM_StageV	0.654287	1	0.833081	0.870336	-1.14898	NonGM_StageII down vs NonGM_StageIII	0.639223	1	0.670038	0.864662	-1.15652	NonGM_StageII down vs NonGM_StageIV	0.00453507	0.761892	0.0602517	0.374544	-2.66991	NonGM_StageII down vs NonGM_StageV	0.983127	1	0.920826	0.99348
OTU_79	0.0304642	1	0.0343698	0.418774	1	0.34593	0.714432	-1.39971	NonGM_StageI down vs NonGM_StageII	0.246464	1	0.258739	0.614752	-1.62667	NonGM_StageI down vs NonGM_StageIII	0.00398721	0.669851	0.0130018	0.263879	-3.78962	NonGM_StageI down vs NonGM_StageIV	0.0393621	1	0.0846285	0.406478	-2.46016	NonGM_StageI down vs NonGM_StageV	0.6996	1	0.857843	0.860476	-1.16215	NonGM_StageII down vs NonGM_StageIII	0.0177147	1	0.13797	0.369354	-2.70743	NonGM_StageII down vs NonGM_StageIV	0.157864	1	0.419466	0.568952	-1.75762	NonGM_StageII down vs NonGM_StageV	0.0399913	1	0.38801	0.429244
OTU_103	0.0321214	1	0.0353335	0.00518553	0.87117	0.0363614	0.569613	-1.75558	NonGM_StageI down vs NonGM_StageII	0.710999	1	0.41169	0.935157	-1.06934	NonGM_StageI down vs NonGM_StageIII	0.492754	1	0.295652	0.882787	-1.13278	NonGM_StageI down vs NonGM_StageIV	0.241187	1	0.252952	0.806022	-1.24066	NonGM_StageI down vs NonGM_StageV	0.00822111	1	0.235127	1.64174	1.64174	NonGM_StageII up vs NonGM_StageIII	0.0173205	1	0.13797	1.5498	1.5498	NonGM_StageII up vs NonGM_StageIV	0.0527624	1	0.233662	1.41504	1.41504	NonGM_StageII up vs NonGM_StageV	0.735411	1	0.896232	0.943998
OTU_245	0.0383197	1	0.0411236	0.111819	1	0.176914	0.536371	-1.86438	NonGM_StageI down vs NonGM_StageII	0.631999	1	0.387967	0.833734	-1.19942	NonGM_StageI down vs NonGM_StageIII	0.00861572	1	0.0230778	0.334833	-2.98657	NonGM_StageI down vs NonGM_StageIV	0.0303382	1	0.0787862	0.417174	-2.39708	NonGM_StageI down vs NonGM_StageV	0.225644	1	0.681253	1.5544	1.5544	NonGM_StageII up vs NonGM_StageIII	0.196751	1	0.444902	0.624256	-1.60191	NonGM_StageII down vs NonGM_StageIV	0.484178	1	0.656392	0.777772	-1.28572	NonGM_StageII down vs NonGM_StageV	0.0179586	1	0.343137	0.401606
OTU_34	0.0399196	1	0.0418206	0.317132	1	0.292392	0.71795	-1.39286	NonGM_StageI down vs NonGM_StageII	0.0161505	1	0.0603603	0.426826	-2.34288	NonGM_StageI down vs NonGM_StageIII	0.0495934	1	0.0641294	0.508461	-1.96672	NonGM_StageI down vs NonGM_StageIV	0.992487	1	0.518072	1.00308	1.00308	NonGM_StageI up vs NonGM_StageV	0.10351	1	0.638685	0.594507	-1.68207	NonGM_StageII down vs NonGM_StageIII	0.270641	1	0.473516	0.708213	-1.41201	NonGM_StageII down vs NonGM_StageIV	0.285139	1	0.528003	1.39715	1.39715	NonGM_StageII up vs NonGM_StageV	0.571665	1	0.884542	1.19126
OTU_52	0.0436694	1	0.0446849	0.00999408	1	0.0483947	2.27087	2.27087	NonGM_StageI up vs NonGM_StageII	0.463044	1	0.336173	1.23948	1.23948	NonGM_StageI up vs NonGM_StageIII	0.0340982	1	0.0502536	1.9242	1.9242	NonGM_StageI up vs NonGM_StageIV	0.482479	1	0.345081	1.22795	1.22795	NonGM_StageI up vs NonGM_StageV	0.0372152	1	0.420512	0.545818	-1.83211	NonGM_StageII down vs NonGM_StageIII	0.547171	1	0.635478	0.847338	-1.18017	NonGM_StageII down vs NonGM_StageIV	0.0346852	1	0.2145	0.540739	-1.84932	NonGM_StageII down vs NonGM_StageV	0.120123	1	0.6661	1.55242
OTU_486	0.0520222	1	0.0509417	0.257228	1	0.265488	0.675363	-1.48069	NonGM_StageI down vs NonGM_StageII	0.300426	1	0.268235	0.699271	-1.43006	NonGM_StageI down vs NonGM_StageIII	0.240283	1	0.187968	1.50282	1.50282	NonGM_StageI up vs NonGM_StageIV	0.304346	1	0.277409	1.42582	1.42582	NonGM_StageI up vs NonGM_StageV	0.913714	1	0.886403	1.0354	1.0354	NonGM_StageII up vs NonGM_StageIII	0.0206362	1	0.145097	2.22521	2.22521	NonGM_StageII up vs NonGM_StageIV	0.0292045	1	0.204212	2.11119	2.11119	NonGM_StageII up vs NonGM_StageV	0.0259872	1	0.38801	2.14913
OTU_602	0.0528161	1	0.0509417	0.698381	1	0.43472	0.905736	-1.10407	NonGM_StageI down vs NonGM_StageII	0.205625	1	0.225426	0.719063	-1.3907	NonGM_StageI down vs NonGM_StageIII	0.382552	1	0.256173	0.798553	-1.25227	NonGM_StageI down vs NonGM_StageIV	0.124118	1	0.180918	1.49914	1.49914	NonGM_StageI up vs NonGM_StageV	0.342888	1	0.709771	0.793899	-1.25961	NonGM_StageII down vs NonGM_StageIII	0.601679	1	0.66406	0.881662	-1.13422	NonGM_StageII down vs NonGM_StageIV	0.047035	1	0.223177	1.65516	1.65516	NonGM_StageII up vs NonGM_StageV	0.663528	1	0.884542	1.11055
OTU_303	0.0540307	1	0.0509417	0.18618	1	0.227262	0.595202	-1.6801	NonGM_StageI down vs NonGM_StageII	0.739506	1	0.415529	0.88017	-1.13614	NonGM_StageI down vs NonGM_StageIII	0.884199	1	0.425096	1.05743	1.05743	NonGM_StageI up vs NonGM_StageIV	0.0990284	1	0.154844	1.92734	1.92734	NonGM_StageI up vs NonGM_StageV	0.286399	1	0.69092	1.47878	1.47878	NonGM_StageII up vs NonGM_StageIII	0.123594	1	0.385042	1.77659	1.77659	NonGM_StageII up vs NonGM_StageIV	0.00381267	0.640529	0.0582047	3.23813	3.23813	NonGM_StageII up vs NonGM_StageV	0.612869	1	0.884542	1.2014
OTU_23	0.054415	1	0.0509417	0.0157475	1	0.0593383	2.80806	2.80806	NonGM_StageI up vs NonGM_StageII	0.0548553	1	0.121904	2.21815	2.21815	NonGM_StageI up vs NonGM_StageIII	0.0110244	1	0.0260354	2.99409	2.99409	NonGM_StageI up vs NonGM_StageIV	0.317707	1	0.283038	1.49119	1.49119	NonGM_StageI up vs NonGM_StageV	0.528318	1	0.785234	0.789922	-1.26595	NonGM_StageII down vs NonGM_StageIII	0.863137	1	0.745786	1.06625	1.06625	NonGM_StageII up vs NonGM_StageIV	0.100937	1	0.377843	0.531038	-1.8831	NonGM_StageII down vs NonGM_StageV	0.424005	1	0.782842	1.34982
OTU_46	0.0557955	1	0.0511459	0.863013	1	0.482545	1.0527	1.0527	NonGM_StageI up vs NonGM_StageII	0.4661	1	0.336173	1.24413	1.24413	NonGM_StageI up vs NonGM_StageIII	0.0119792	1	0.0264247	2.26118	2.26118	NonGM_StageI up vs NonGM_StageIV	0.694288	1	0.429559	1.12434	1.12434	NonGM_StageI up vs NonGM_StageV	0.553371	1	0.806184	1.18184	1.18184	NonGM_StageII up vs NonGM_StageIII	0.0124292	1	0.129073	2.14797	2.14797	NonGM_StageII up vs NonGM_StageIV	0.814597	1	0.765506	1.06805	1.06805	NonGM_StageII up vs NonGM_StageV	0.0439543	1	0.38801	1.81748
OTU_24	0.0571916	1	0.051179	0.689641	1	0.434098	1.0986	1.0986	NonGM_StageI up vs NonGM_StageII	0.379385	1	0.301648	1.2321	1.2321	NonGM_StageI up vs NonGM_StageIII	0.2354	1	0.187968	1.32868	1.32868	NonGM_StageI up vs NonGM_StageIV	0.00819404	1	0.0391493	1.98278	1.98278	NonGM_StageI up vs NonGM_StageV	0.605996	1	0.828639	1.12152	1.12152	NonGM_StageII up vs NonGM_StageIII	0.395354	1	0.547414	1.20943	1.20943	NonGM_StageII up vs NonGM_StageIV	0.0141745	1	0.144861	1.80482	1.80482	NonGM_StageII up vs NonGM_StageV	0.733786	1	0.896232	1.07838
OTU_150	0.058158	1	0.051179	0.386944	1	0.328776	1.36222	1.36222	NonGM_StageI up vs NonGM_StageII	0.0299513	1	0.0849193	2.26843	2.26843	NonGM_StageI up vs NonGM_StageIII	0.0113507	1	0.0260354	2.66031	2.66031	NonGM_StageI up vs NonGM_StageIV	0.0372629	1	0.0846285	2.18549	2.18549	NonGM_StageI up vs NonGM_StageV	0.137751	1	0.679416	1.66524	1.66524	NonGM_StageII up vs NonGM_StageIII	0.0561848	1	0.225855	1.95292	1.95292	NonGM_StageII up vs NonGM_StageIV	0.167165	1	0.435473	1.60435	1.60435	NonGM_StageII up vs NonGM_StageV	0.63378	1	0.884542	1.17276
OTU_61	0.0594487	1	0.0512891	0.0126559	1	0.054842	3.61041	3.61041	NonGM_StageI up vs NonGM_StageII	0.0321374	1	0.0880802	2.93972	2.93972	NonGM_StageI up vs NonGM_StageIII	0.0143473	1	0.0283171	3.51404	3.51404	NonGM_StageI up vs NonGM_StageIV	0.01015	1	0.0427018	3.78499	3.78499	NonGM_StageI up vs NonGM_StageV	0.645535	1	0.833081	0.814236	-1.22815	NonGM_StageII down vs NonGM_StageIII	0.95158	1	0.750516	0.973309	-1.02742	NonGM_StageII down vs NonGM_StageIV	0.915595	1	0.800344	1.04836	1.04836	NonGM_StageII up vs NonGM_StageV	0.689378	1	0.894919	1.19537
OTU_956	0.0626444	1	0.0530068	0.0733372	1	0.138172	1.61318	1.61318	NonGM_StageI up vs NonGM_StageII	0.427105	1	0.325162	0.814862	-1.2272	NonGM_StageI down vs NonGM_StageIII	0.212239	1	0.176866	1.38494	1.38494	NonGM_StageI up vs NonGM_StageIV	0.214749	1	0.237262	1.38238	1.38238	NonGM_StageI up vs NonGM_StageV	0.00977553	1	0.235127	0.505127	-1.9797	NonGM_StageII down vs NonGM_StageIII	0.528949	1	0.635478	0.858516	-1.1648	NonGM_StageII down vs NonGM_StageIV	0.524004	1	0.667683	0.856925	-1.16696	NonGM_StageII down vs NonGM_StageV	0.0380104	1	0.38801	1.69961
OTU_65	0.0651078	1	0.0540517	0.565981	1	0.382136	0.832134	-1.20173	NonGM_StageI down vs NonGM_StageII	0.521299	1	0.346998	1.22821	1.22821	NonGM_StageI up vs NonGM_StageIII	0.0736048	1	0.0904976	1.81426	1.81426	NonGM_StageI up vs NonGM_StageIV	0.0823419	1	0.133611	1.78064	1.78064	NonGM_StageI up vs NonGM_StageV	0.204925	1	0.681253	1.47597	1.47597	NonGM_StageII up vs NonGM_StageIII	0.0165605	1	0.13797	2.18025	2.18025	NonGM_StageII up vs NonGM_StageIV	0.0189453	1	0.14806	2.13985	2.13985	NonGM_StageII up vs NonGM_StageV	0.204026	1	0.722472	1.47716
OTU_246	0.0743215	1	0.0595733	0.0246079	1	0.0718771	0.387804	-2.57862	NonGM_StageI down vs NonGM_StageII	0.882294	1	0.459141	1.05996	1.05996	NonGM_StageI up vs NonGM_StageIII	0.137724	1	0.13075	0.548068	-1.82459	NonGM_StageI down vs NonGM_StageIV	0.319676	1	0.283038	0.672638	-1.48668	NonGM_StageI down vs NonGM_StageV	0.0127836	1	0.235127	2.73325	2.73325	NonGM_StageII up vs NonGM_StageIII	0.35631	1	0.516299	1.41326	1.41326	NonGM_StageII up vs NonGM_StageIV	0.148713	1	0.419466	1.73448	1.73448	NonGM_StageII up vs NonGM_StageV	0.0873023	1	0.557958	0.517063
OTU_74	0.0744666	1	0.0595733	0.0518809	1	0.109667	0.424724	-2.35447	NonGM_StageI down vs NonGM_StageII	0.0622409	1	0.12616	0.441387	-2.26559	NonGM_StageI down vs NonGM_StageIII	0.00536082	0.900618	0.0154639	0.273266	-3.65943	NonGM_StageI down vs NonGM_StageIV	0.0507515	1	0.0991962	0.422773	-2.36534	NonGM_StageI down vs NonGM_StageV	0.922275	1	0.886403	1.03923	1.03923	NonGM_StageII up vs NonGM_StageIII	0.27129	1	0.473516	0.643398	-1.55425	NonGM_StageII down vs NonGM_StageIV	0.990684	1	0.800344	0.995406	-1.00462	NonGM_StageII down vs NonGM_StageV	0.233007	1	0.726875	0.619109
OTU_59	0.0762667	1	0.0599239	0.880104	1	0.488946	1.04718	1.04718	NonGM_StageI up vs NonGM_StageII	0.547835	1	0.349508	1.20265	1.20265	NonGM_StageI up vs NonGM_StageIII	0.156689	1	0.143313	1.55999	1.55999	NonGM_StageI up vs NonGM_StageIV	0.0175112	1	0.0599506	2.19161	2.19161	NonGM_StageI up vs NonGM_StageV	0.6319	1	0.830175	1.14847	1.14847	NonGM_StageII up vs NonGM_StageIII	0.177062	1	0.42432	1.48971	1.48971	NonGM_StageII up vs NonGM_StageIV	0.0176734	1	0.146752	2.09287	2.09287	NonGM_StageII up vs NonGM_StageV	0.371642	1	0.782842	1.29713
OTU_406	0.0809148	1	0.0624605	0.433986	1	0.348203	1.24713	1.24713	NonGM_StageI up vs NonGM_StageII	0.282721	1	0.264158	1.35724	1.35724	NonGM_StageI up vs NonGM_StageIII	0.0414116	1	0.0575161	1.83012	1.83012	NonGM_StageI up vs NonGM_StageIV	0.0137199	1	0.0513004	2.11761	2.11761	NonGM_StageI up vs NonGM_StageV	0.748868	1	0.867209	1.08829	1.08829	NonGM_StageII up vs NonGM_StageIII	0.157291	1	0.408352	1.46747	1.46747	NonGM_StageII up vs NonGM_StageIV	0.0563192	1	0.241368	1.69799	1.69799	NonGM_StageII up vs NonGM_StageV	0.265395	1	0.729702	1.34841
OTU_591	0.0847267	1	0.0642754	0.0286384	1	0.0800644	2.40682	2.40682	NonGM_StageI up vs NonGM_StageII	0.0185145	1	0.0620262	2.59957	2.59957	NonGM_StageI up vs NonGM_StageIII	0.0183984	1	0.0336556	2.60242	2.60242	NonGM_StageI up vs NonGM_StageIV	0.0181246	1	0.0599506	2.60923	2.60923	NonGM_StageI up vs NonGM_StageV	0.827977	1	0.886403	1.08008	1.08008	NonGM_StageII up vs NonGM_StageIII	0.825571	1	0.73556	1.08127	1.08127	NonGM_StageII up vs NonGM_StageIV	0.819847	1	0.765506	1.0841	1.0841	NonGM_StageII up vs NonGM_StageV	0.997531	1	0.920826	1.0011
OTU_85	0.088005	1	0.0648155	0.013569	1	0.0559992	3.32708	3.32708	NonGM_StageI up vs NonGM_StageII	0.421304	1	0.324853	1.43787	1.43787	NonGM_StageI up vs NonGM_StageIII	0.688945	1	0.361335	1.19673	1.19673	NonGM_StageI up vs NonGM_StageIV	0.493546	1	0.345081	1.36133	1.36133	NonGM_StageI up vs NonGM_StageV	0.058398	1	0.47738	0.432171	-2.3139	NonGM_StageII down vs NonGM_StageIII	0.0239163	1	0.145097	0.359692	-2.78016	NonGM_StageII down vs NonGM_StageIV	0.0450707	1	0.221777	0.409166	-2.44399	NonGM_StageII down vs NonGM_StageV	0.664413	1	0.884542	0.83229
OTU_66	0.0883847	1	0.0648155	0.502984	1	0.357311	0.816107	-1.22533	NonGM_StageI down vs NonGM_StageII	0.252986	1	0.259573	0.704077	-1.4203	NonGM_StageI down vs NonGM_StageIII	0.0985522	1	0.108697	0.596308	-1.67699	NonGM_StageI down vs NonGM_StageIV	0.369239	1	0.299571	1.31486	1.31486	NonGM_StageI up vs NonGM_StageV	0.604822	1	0.828639	0.862727	-1.15912	NonGM_StageII down vs NonGM_StageIII	0.277387	1	0.473516	0.730674	-1.3686	NonGM_StageII down vs NonGM_StageIV	0.105494	1	0.377843	1.61114	1.61114	NonGM_StageII up vs NonGM_StageV	0.560791	1	0.884542	0.846935
OTU_106	0.0958274	1	0.0684602	0.0514874	1	0.109667	0.402139	-2.4867	NonGM_StageI down vs NonGM_StageII	0.198632	1	0.220702	0.557744	-1.79294	NonGM_StageI down vs NonGM_StageIII	0.0114556	1	0.0260354	0.29323	-3.4103	NonGM_StageI down vs NonGM_StageIV	0.328474	1	0.283458	0.644262	-1.55216	NonGM_StageI down vs NonGM_StageV	0.438428	1	0.755333	1.38694	1.38694	NonGM_StageII up vs NonGM_StageIII	0.454109	1	0.577439	0.729175	-1.37141	NonGM_StageII down vs NonGM_StageIV	0.268282	1	0.528003	1.60209	1.60209	NonGM_StageII up vs NonGM_StageV	0.136272	1	0.6661	0.525742
OTU_7	0.0966554	1	0.0684602	0.017145	1	0.0594361	0.544777	-1.83561	NonGM_StageI down vs NonGM_StageII	0.0340563	1	0.0903285	0.587952	-1.70082	NonGM_StageI down vs NonGM_StageIII	0.016359	1	0.0306732	0.542005	-1.845	NonGM_StageI down vs NonGM_StageIV	0.0431592	1	0.090529	0.604168	-1.65517	NonGM_StageI down vs NonGM_StageV	0.731767	1	0.867209	1.07925	1.07925	NonGM_StageII up vs NonGM_StageIII	0.98168	1	0.750695	0.994912	-1.00511	NonGM_StageII down vs NonGM_StageIV	0.642332	1	0.729388	1.10902	1.10902	NonGM_StageII up vs NonGM_StageV	0.714647	1	0.894919	0.921854
OTU_87	0.0980225	1	0.0684602	0.719269	1	0.436554	1.10259	1.10259	NonGM_StageI up vs NonGM_StageII	0.273661	1	0.264158	1.35222	1.35222	NonGM_StageI up vs NonGM_StageIII	0.0161728	1	0.0306732	2.02678	2.02678	NonGM_StageI up vs NonGM_StageIV	0.55133	1	0.364119	1.17629	1.17629	NonGM_StageI up vs NonGM_StageV	0.4287	1	0.753588	1.22641	1.22641	NonGM_StageII up vs NonGM_StageIII	0.0261283	1	0.147999	1.83821	1.83821	NonGM_StageII up vs NonGM_StageIV	0.800411	1	0.765039	1.06684	1.06684	NonGM_StageII up vs NonGM_StageV	0.125299	1	0.6661	1.49885
OTU_281	0.108598	1	0.0738871	0.309447	1	0.288373	1.38582	1.38582	NonGM_StageI up vs NonGM_StageII	0.671589	1	0.400141	0.874111	-1.14402	NonGM_StageI down vs NonGM_StageIII	0.433587	1	0.280336	1.28398	1.28398	NonGM_StageI up vs NonGM_StageIV	0.175194	1	0.215238	0.644021	-1.55275	NonGM_StageI down vs NonGM_StageV	0.134226	1	0.679416	0.630752	-1.58541	NonGM_StageII down vs NonGM_StageIII	0.798339	1	0.724821	0.926512	-1.07932	NonGM_StageII down vs NonGM_StageIV	0.017533	1	0.146752	0.464721	-2.15183	NonGM_StageII down vs NonGM_StageV	0.207379	1	0.722472	1.4689
OTU_56	0.109151	1	0.0738871	0.326143	1	0.292435	1.48997	1.48997	NonGM_StageI up vs NonGM_StageII	0.0718787	1	0.130421	2.12566	2.12566	NonGM_StageI up vs NonGM_StageIII	0.24052	1	0.187968	1.61498	1.61498	NonGM_StageI up vs NonGM_StageIV	0.554646	1	0.364119	0.788247	-1.26864	NonGM_StageI down vs NonGM_StageV	0.352738	1	0.709771	1.42664	1.42664	NonGM_StageII up vs NonGM_StageIII	0.831289	1	0.73556	1.0839	1.0839	NonGM_StageII up vs NonGM_StageIV	0.104107	1	0.377843	0.529034	-1.89024	NonGM_StageII down vs NonGM_StageV	0.470343	1	0.826383	0.759758
OTU_815	0.116011	1	0.0761146	0.113321	1	0.176914	2.26142	2.26142	NonGM_StageI up vs NonGM_StageII	0.0299363	1	0.0849193	3.1693	3.1693	NonGM_StageI up vs NonGM_StageIII	0.0137167	1	0.0278041	3.79961	3.79961	NonGM_StageI up vs NonGM_StageIV	0.0574454	1	0.105113	2.70228	2.70228	NonGM_StageI up vs NonGM_StageV	0.475318	1	0.770405	1.40146	1.40146	NonGM_StageII up vs NonGM_StageIII	0.276803	1	0.473516	1.68019	1.68019	NonGM_StageII up vs NonGM_StageIV	0.705018	1	0.758187	1.19495	1.19495	NonGM_StageII up vs NonGM_StageV	0.699859	1	0.894919	1.19888
OTU_10	0.117421	1	0.0761146	0.194788	1	0.234467	0.778026	-1.2853	NonGM_StageI down vs NonGM_StageII	0.0293745	1	0.0849193	0.644055	-1.55266	NonGM_StageI down vs NonGM_StageIII	0.305475	1	0.222433	0.821449	-1.21736	NonGM_StageI down vs NonGM_StageIV	0.0212536	1	0.0676965	0.625692	-1.59823	NonGM_StageI down vs NonGM_StageV	0.296596	1	0.693624	0.827807	-1.20801	NonGM_StageII down vs NonGM_StageIII	0.761101	1	0.718522	1.05581	1.05581	NonGM_StageII up vs NonGM_StageIV	0.230962	1	0.503032	0.804205	-1.24346	NonGM_StageII down vs NonGM_StageV	0.183094	1	0.703667	1.27543
OTU_199	0.117632	1	0.0761146	0.493986	1	0.356768	1.33916	1.33916	NonGM_StageI up vs NonGM_StageII	0.0188593	1	0.0620262	2.92992	2.92992	NonGM_StageI up vs NonGM_StageIII	0.118974	1	0.123931	1.98124	1.98124	NonGM_StageI up vs NonGM_StageIV	0.53607	1	0.360172	1.30199	1.30199	NonGM_StageI up vs NonGM_StageV	0.0619943	1	0.480106	2.18789	2.18789	NonGM_StageII up vs NonGM_StageIII	0.333608	1	0.506984	1.47947	1.47947	NonGM_StageII up vs NonGM_StageIV	0.943906	1	0.800344	0.972245	-1.02855	NonGM_StageII down vs NonGM_StageV	0.334122	1	0.782842	0.676208
OTU_84	0.122484	1	0.0781055	0.185579	1	0.227262	0.559274	-1.78803	NonGM_StageI down vs NonGM_StageII	0.156559	1	0.19504	0.535745	-1.86656	NonGM_StageI down vs NonGM_StageIII	0.0211074	1	0.0369864	0.345201	-2.89687	NonGM_StageI down vs NonGM_StageIV	0.732383	1	0.446702	0.863448	-1.15815	NonGM_StageI down vs NonGM_StageV	0.915323	1	0.886403	0.95793	-1.04392	NonGM_StageII down vs NonGM_StageIII	0.241248	1	0.467539	0.61723	-1.62014	NonGM_StageII down vs NonGM_StageIV	0.289874	1	0.528003	1.54387	1.54387	NonGM_StageII up vs NonGM_StageV	0.284267	1	0.736479	0.644337
OTU_127	0.12604	1	0.0792253	0.0170153	1	0.0594361	0.389456	-2.56768	NonGM_StageI down vs NonGM_StageII	0.0443377	1	0.110471	0.460042	-2.17371	NonGM_StageI down vs NonGM_StageIII	0.0341725	1	0.0502536	0.439169	-2.27703	NonGM_StageI down vs NonGM_StageIV	0.132758	1	0.187167	0.56761	-1.76177	NonGM_StageI down vs NonGM_StageV	0.629744	1	0.830175	1.18124	1.18124	NonGM_StageII up vs NonGM_StageIII	0.727679	1	0.709716	1.12765	1.12765	NonGM_StageII up vs NonGM_StageIV	0.281647	1	0.528003	1.45744	1.45744	NonGM_StageII up vs NonGM_StageV	0.892785	1	0.920826	0.954627
OTU_158	0.127946	1	0.0792906	0.240531	1	0.260576	1.48281	1.48281	NonGM_StageI up vs NonGM_StageII	0.110299	1	0.163996	1.72401	1.72401	NonGM_StageI up vs NonGM_StageIII	0.0212056	1	0.0369864	2.26305	2.26305	NonGM_StageI up vs NonGM_StageIV	0.650428	1	0.408298	1.1615	1.1615	NonGM_StageI up vs NonGM_StageV	0.628611	1	0.830175	1.16266	1.16266	NonGM_StageII up vs NonGM_StageIII	0.183879	1	0.432343	1.52619	1.52619	NonGM_StageII up vs NonGM_StageIV	0.435472	1	0.623158	0.783308	-1.27664	NonGM_StageII down vs NonGM_StageV	0.385917	1	0.782842	1.31267
OTU_49	0.138431	1	0.0845969	0.0917446	1	0.159024	1.64341	1.64341	NonGM_StageI up vs NonGM_StageII	0.0460733	1	0.111419	1.81659	1.81659	NonGM_StageI up vs NonGM_StageIII	0.394969	1	0.260454	1.27564	1.27564	NonGM_StageI up vs NonGM_StageIV	0.0257053	1	0.0736886	1.96782	1.96782	NonGM_StageI up vs NonGM_StageV	0.708229	1	0.861247	1.10538	1.10538	NonGM_StageII up vs NonGM_StageIII	0.348809	1	0.511376	0.776214	-1.2883	NonGM_StageII down vs NonGM_StageIV	0.502762	1	0.666202	1.1974	1.1974	NonGM_StageII up vs NonGM_StageV	0.195884	1	0.722472	0.702217
OTU_176	0.144659	1	0.0871916	0.135387	1	0.188894	1.81261	1.81261	NonGM_StageI up vs NonGM_StageII	0.313908	1	0.269003	0.673994	-1.48369	NonGM_StageI down vs NonGM_StageIII	0.938785	1	0.445626	1.03012	1.03012	NonGM_StageI up vs NonGM_StageIV	0.703642	1	0.432237	1.15869	1.15869	NonGM_StageI up vs NonGM_StageV	0.0126997	1	0.235127	0.371837	-2.68935	NonGM_StageII down vs NonGM_StageIII	0.132565	1	0.393324	0.568311	-1.7596	NonGM_StageII down vs NonGM_StageIV	0.22847	1	0.503032	0.639241	-1.56436	NonGM_StageII down vs NonGM_StageV	0.25266	1	0.729702	1.52839
OTU_116	0.147696	1	0.0878192	0.297464	1	0.288373	0.576373	-1.73499	NonGM_StageI down vs NonGM_StageII	0.743692	1	0.415529	0.843121	-1.18607	NonGM_StageI down vs NonGM_StageIII	0.11279	1	0.119145	0.425211	-2.35177	NonGM_StageI down vs NonGM_StageIV	0.0300563	1	0.0787862	0.299395	-3.34007	NonGM_StageI down vs NonGM_StageV	0.442497	1	0.755333	1.46281	1.46281	NonGM_StageII up vs NonGM_StageIII	0.537961	1	0.635478	0.737736	-1.3555	NonGM_StageII down vs NonGM_StageIV	0.192658	1	0.449052	0.519447	-1.92512	NonGM_StageII down vs NonGM_StageV	0.174231	1	0.700854	0.50433
OTU_57	0.152754	1	0.0896154	0.0196142	1	0.0629591	2.99559	2.99559	NonGM_StageI up vs NonGM_StageII	0.193776	1	0.218799	1.7859	1.7859	NonGM_StageI up vs NonGM_StageIII	0.0478883	1	0.0630109	2.48524	2.48524	NonGM_StageI up vs NonGM_StageIV	0.230999	1	0.250835	1.70351	1.70351	NonGM_StageI up vs NonGM_StageV	0.217891	1	0.681253	0.596175	-1.67736	NonGM_StageII down vs NonGM_StageIII	0.650599	1	0.670038	0.829632	-1.20535	NonGM_StageII down vs NonGM_StageIV	0.18037	1	0.43986	0.568671	-1.75849	NonGM_StageII down vs NonGM_StageV	0.42562	1	0.782842	1.39159
OTU_42	0.156667	1	0.0901843	0.204691	1	0.236532	0.530533	-1.8849	NonGM_StageI down vs NonGM_StageII	0.0416441	1	0.107002	0.348406	-2.87022	NonGM_StageI down vs NonGM_StageIII	0.0250917	1	0.0424932	0.309256	-3.23357	NonGM_StageI down vs NonGM_StageIV	0.0568591	1	0.105113	0.375846	-2.66067	NonGM_StageI down vs NonGM_StageV	0.366989	1	0.709771	0.656709	-1.52275	NonGM_StageII down vs NonGM_StageIII	0.250192	1	0.471073	0.582915	-1.71552	NonGM_StageII down vs NonGM_StageIV	0.45801	1	0.640525	0.70843	-1.41157	NonGM_StageII down vs NonGM_StageV	0.796167	1	0.896232	0.887631
OTU_257	0.157823	1	0.0901843	0.305535	1	0.288373	1.49828	1.49828	NonGM_StageI up vs NonGM_StageII	0.787576	1	0.431709	0.900386	-1.11064	NonGM_StageI down vs NonGM_StageIII	0.0886154	1	0.100699	1.99195	1.99195	NonGM_StageI up vs NonGM_StageIV	0.128411	1	0.184056	1.84109	1.84109	NonGM_StageI up vs NonGM_StageV	0.175639	1	0.681253	0.600947	-1.66404	NonGM_StageII down vs NonGM_StageIII	0.441137	1	0.569401	1.32949	1.32949	NonGM_StageII up vs NonGM_StageIV	0.575896	1	0.680042	1.22881	1.22881	NonGM_StageII up vs NonGM_StageV	0.0409117	1	0.38801	2.21233
OTU_14	0.167012	1	0.0942121	0.363173	1	0.31475	1.50842	1.50842	NonGM_StageI up vs NonGM_StageII	0.687866	1	0.40112	0.835281	-1.1972	NonGM_StageI down vs NonGM_StageIII	0.205261	1	0.174938	0.560629	-1.78371	NonGM_StageI down vs NonGM_StageIV	0.282142	1	0.274595	0.613628	-1.62965	NonGM_StageI down vs NonGM_StageV	0.17154	1	0.681253	0.553746	-1.80588	NonGM_StageII down vs NonGM_StageIII	0.0279728	1	0.148808	0.371666	-2.69059	NonGM_StageII down vs NonGM_StageIV	0.0435586	1	0.221777	0.406801	-2.4582	NonGM_StageII down vs NonGM_StageV	0.349834	1	0.782842	0.671186
OTU_48	0.174458	1	0.0944016	0.465789	1	0.350415	0.687292	-1.45499	NonGM_StageI down vs NonGM_StageII	0.0629095	1	0.12616	0.369608	-2.70557	NonGM_StageI down vs NonGM_StageIII	0.0313577	1	0.0479964	0.310077	-3.225	NonGM_StageI down vs NonGM_StageIV	0.183785	1	0.222613	0.499092	-2.00364	NonGM_StageI down vs NonGM_StageV	0.207163	1	0.681253	0.537774	-1.85952	NonGM_StageII down vs NonGM_StageIII	0.110181	1	0.352057	0.451158	-2.21652	NonGM_StageII down vs NonGM_StageIV	0.508661	1	0.666202	0.726171	-1.37709	NonGM_StageII down vs NonGM_StageV	0.715671	1	0.894919	0.838936
OTU_71	0.175099	1	0.0944016	0.233333	1	0.259259	1.59079	1.59079	NonGM_StageI up vs NonGM_StageII	0.725188	1	0.415529	0.874115	-1.14401	NonGM_StageI down vs NonGM_StageIII	0.723975	1	0.371905	0.873572	-1.14473	NonGM_StageI down vs NonGM_StageIV	0.236793	1	0.25141	0.630855	-1.58515	NonGM_StageI down vs NonGM_StageV	0.108514	1	0.638685	0.549486	-1.81988	NonGM_StageII down vs NonGM_StageIII	0.108173	1	0.352057	0.549145	-1.82101	NonGM_StageII down vs NonGM_StageIV	0.0175318	1	0.146752	0.396569	-2.52163	NonGM_StageII down vs NonGM_StageV	0.998624	1	0.920826	0.999379
OTU_724	0.175888	1	0.0944016	0.371921	1	0.31914	1.3771	1.3771	NonGM_StageI up vs NonGM_StageII	0.489185	1	0.338215	1.2799	1.2799	NonGM_StageI up vs NonGM_StageIII	0.722021	1	0.371905	0.881312	-1.13467	NonGM_StageI down vs NonGM_StageIV	0.064563	1	0.115358	1.98685	1.98685	NonGM_StageI up vs NonGM_StageV	0.826772	1	0.886403	0.929418	-1.07594	NonGM_StageII down vs NonGM_StageIII	0.191954	1	0.44297	0.639978	-1.56255	NonGM_StageII down vs NonGM_StageIV	0.280348	1	0.528003	1.44278	1.44278	NonGM_StageII up vs NonGM_StageV	0.272104	1	0.729702	0.688579
OTU_111	0.17593	1	0.0944016	0.0181813	1	0.0606042	2.89773	2.89773	NonGM_StageI up vs NonGM_StageII	0.0660646	1	0.126325	2.23189	2.23189	NonGM_StageI up vs NonGM_StageIII	0.109714	1	0.11858	1.99533	1.99533	NonGM_StageI up vs NonGM_StageIV	0.146316	1	0.193779	1.86555	1.86555	NonGM_StageI up vs NonGM_StageV	0.509272	1	0.780581	0.770222	-1.29833	NonGM_StageII down vs NonGM_StageIII	0.348471	1	0.511376	0.688584	-1.45225	NonGM_StageII down vs NonGM_StageIV	0.270661	1	0.528003	0.643797	-1.55328	NonGM_StageII down vs NonGM_StageV	0.775963	1	0.896232	0.894008
OTU_192	0.184547	1	0.0960995	0.246677	1	0.263935	1.59897	1.59897	NonGM_StageI up vs NonGM_StageII	0.902623	1	0.466765	1.04989	1.04989	NonGM_StageI up vs NonGM_StageIII	0.363011	1	0.247508	1.44193	1.44193	NonGM_StageI up vs NonGM_StageIV	0.0386835	1	0.0846285	2.39224	2.39224	NonGM_StageI up vs NonGM_StageV	0.269965	1	0.69092	0.656605	-1.52299	NonGM_StageII down vs NonGM_StageIII	0.783084	1	0.724821	0.901788	-1.10891	NonGM_StageII down vs NonGM_StageIV	0.290118	1	0.528003	1.49611	1.49611	NonGM_StageII up vs NonGM_StageV	0.402094	1	0.782842	1.37341
OTU_75	0.184744	1	0.0960995	0.0806501	1	0.142646	0.466318	-2.14446	NonGM_StageI down vs NonGM_StageII	0.168391	1	0.197793	0.553196	-1.80768	NonGM_StageI down vs NonGM_StageIII	0.0367353	1	0.0529836	0.39499	-2.53171	NonGM_StageI down vs NonGM_StageIV	0.031148	1	0.0787862	0.382033	-2.61758	NonGM_StageI down vs NonGM_StageV	0.666117	1	0.837729	1.18631	1.18631	NonGM_StageII up vs NonGM_StageIII	0.674979	1	0.683844	0.847041	-1.18058	NonGM_StageII down vs NonGM_StageIV	0.614928	1	0.710437	0.819254	-1.22062	NonGM_StageII down vs NonGM_StageV	0.398271	1	0.782842	0.714015
OTU_8	0.185647	1	0.0960995	0.362769	1	0.31475	1.19395	1.19395	NonGM_StageI up vs NonGM_StageII	0.348829	1	0.286815	1.20033	1.20033	NonGM_StageI up vs NonGM_StageIII	0.133642	1	0.130171	1.34697	1.34697	NonGM_StageI up vs NonGM_StageIV	0.0222378	1	0.068302	1.6051	1.6051	NonGM_StageI up vs NonGM_StageV	0.976564	1	0.886403	1.00535	1.00535	NonGM_StageII up vs NonGM_StageIII	0.509134	1	0.63446	1.12816	1.12816	NonGM_StageII up vs NonGM_StageIV	0.115134	1	0.382411	1.34437	1.34437	NonGM_StageII up vs NonGM_StageV	0.527845	1	0.87701	1.12216
OTU_157	0.189162	1	0.0967806	0.307705	1	0.288373	0.602937	-1.65855	NonGM_StageI down vs NonGM_StageII	0.277562	1	0.264158	0.582996	-1.71528	NonGM_StageI down vs NonGM_StageIII	0.0258565	1	0.0424932	0.311363	-3.21169	NonGM_StageI down vs NonGM_StageIV	0.612427	1	0.396005	0.779869	-1.28227	NonGM_StageI down vs NonGM_StageV	0.941858	1	0.886403	0.966926	-1.0342	NonGM_StageII down vs NonGM_StageIII	0.162769	1	0.41002	0.516411	-1.93644	NonGM_StageII down vs NonGM_StageIV	0.578402	1	0.680042	1.29345	1.29345	NonGM_StageII up vs NonGM_StageV	0.184137	1	0.703667	0.534074
OTU_27	0.196154	1	0.0992042	0.419108	1	0.34593	1.36216	1.36216	NonGM_StageI up vs NonGM_StageII	0.0218881	1	0.0692188	2.54557	2.54557	NonGM_StageI up vs NonGM_StageIII	0.295569	1	0.219482	1.49559	1.49559	NonGM_StageI up vs NonGM_StageIV	0.290443	1	0.274595	1.50222	1.50222	NonGM_StageI up vs NonGM_StageV	0.092391	1	0.638685	1.86877	1.86877	NonGM_StageII up vs NonGM_StageIII	0.793972	1	0.724821	1.09795	1.09795	NonGM_StageII up vs NonGM_StageIV	0.784466	1	0.765039	1.10282	1.10282	NonGM_StageII up vs NonGM_StageV	0.14816	1	0.6661	0.587526
OTU_55	0.20148	1	0.10074	0.0446304	1	0.107443	1.8837	1.8837	NonGM_StageI up vs NonGM_StageII	0.0542636	1	0.121904	1.82975	1.82975	NonGM_StageI up vs NonGM_StageIII	0.130717	1	0.128997	1.59231	1.59231	NonGM_StageI up vs NonGM_StageIV	0.0369198	1	0.0846285	1.93664	1.93664	NonGM_StageI up vs NonGM_StageV	0.917745	1	0.886403	0.971359	-1.02949	NonGM_StageII down vs NonGM_StageIII	0.552182	1	0.635478	0.845309	-1.183	NonGM_StageII down vs NonGM_StageIV	0.921524	1	0.800344	1.02811	1.02811	NonGM_StageII up vs NonGM_StageV	0.622415	1	0.884542	0.870234
OTU_67	0.210571	1	0.103858	0.0354346	1	0.0903234	3.06157	3.06157	NonGM_StageI up vs NonGM_StageII	0.136654	1	0.185083	2.1553	2.1553	NonGM_StageI up vs NonGM_StageIII	0.122975	1	0.124637	2.22021	2.22021	NonGM_StageI up vs NonGM_StageIV	0.0386715	1	0.0846285	2.99713	2.99713	NonGM_StageI up vs NonGM_StageV	0.460426	1	0.769869	0.703986	-1.42048	NonGM_StageII down vs NonGM_StageIII	0.498697	1	0.62773	0.725187	-1.37895	NonGM_StageII down vs NonGM_StageIV	0.964059	1	0.800344	0.978954	-1.0215	NonGM_StageII down vs NonGM_StageV	0.949881	1	0.920826	1.03012
OTU_282	0.212757	1	0.103858	0.462499	1	0.350415	0.864238	-1.15709	NonGM_StageI down vs NonGM_StageII	0.0653662	1	0.126325	0.683506	-1.46304	NonGM_StageI down vs NonGM_StageIII	1	1	0.451807	1	1	No change between NonGM_StageI and NonGM_StageIV	1	1	0.518072	1	1	No change between NonGM_StageI and NonGM_StageV	0.216313	1	0.681253	0.790877	-1.26442	NonGM_StageII down vs NonGM_StageIII	0.436211	1	0.569401	1.15709	1.15709	NonGM_StageII up vs NonGM_StageIV	0.436211	1	0.623158	1.15709	1.15709	NonGM_StageII up vs NonGM_StageV	0.0518782	1	0.38801	1.46304
OTU_51	0.21529	1	0.103858	0.508735	1	0.358365	0.816746	-1.22437	NonGM_StageI down vs NonGM_StageII	0.0686323	1	0.128252	0.559805	-1.78634	NonGM_StageI down vs NonGM_StageIII	0.746699	1	0.380969	0.906195	-1.10352	NonGM_StageI down vs NonGM_StageIV	0.808817	1	0.475793	1.07653	1.07653	NonGM_StageI up vs NonGM_StageV	0.198283	1	0.681253	0.685409	-1.45898	NonGM_StageII down vs NonGM_StageIII	0.717856	1	0.709716	1.10952	1.10952	NonGM_StageII up vs NonGM_StageIV	0.342007	1	0.560964	1.31807	1.31807	NonGM_StageII up vs NonGM_StageV	0.105483	1	0.644951	1.61877
OTU_62	0.217157	1	0.103858	0.327303	1	0.292435	0.703962	-1.42053	NonGM_StageI down vs NonGM_StageII	0.111695	1	0.163996	0.558577	-1.79026	NonGM_StageI down vs NonGM_StageIII	0.200816	1	0.174938	0.629607	-1.58829	NonGM_StageI down vs NonGM_StageIV	0.0255074	1	0.0736886	0.429041	-2.33078	NonGM_StageI down vs NonGM_StageV	0.490696	1	0.773459	0.793476	-1.26028	NonGM_StageII down vs NonGM_StageIII	0.738226	1	0.709716	0.894377	-1.1181	NonGM_StageII down vs NonGM_StageIV	0.148925	1	0.419466	0.609466	-1.64078	NonGM_StageII down vs NonGM_StageV	0.720117	1	0.894919	1.12716
OTU_4	0.219695	1	0.103942	0.425126	1	0.346262	0.887012	-1.12738	NonGM_StageI down vs NonGM_StageII	0.531941	1	0.349508	0.9106	-1.09818	NonGM_StageI down vs NonGM_StageIII	0.205159	1	0.174938	1.21287	1.21287	NonGM_StageI up vs NonGM_StageIV	0.826195	1	0.480086	0.967781	-1.03329	NonGM_StageI down vs NonGM_StageV	0.85191	1	0.886403	1.02659	1.02659	NonGM_StageII up vs NonGM_StageIII	0.0360443	1	0.166359	1.36736	1.36736	NonGM_StageII up vs NonGM_StageIV	0.537234	1	0.673353	1.09106	1.09106	NonGM_StageII up vs NonGM_StageV	0.0526505	1	0.38801	1.33195
OTU_269	0.232439	1	0.107305	0.568795	1	0.382136	0.853494	-1.17165	NonGM_StageI down vs NonGM_StageII	0.322342	1	0.272633	1.31993	1.31993	NonGM_StageI up vs NonGM_StageIII	0.14888	1	0.137852	1.50834	1.50834	NonGM_StageI up vs NonGM_StageIV	0.41114	1	0.318541	1.25807	1.25807	NonGM_StageI up vs NonGM_StageV	0.106822	1	0.638685	1.5465	1.5465	NonGM_StageII up vs NonGM_StageIII	0.0395023	1	0.169745	1.76726	1.76726	NonGM_StageII up vs NonGM_StageIV	0.148398	1	0.419466	1.47402	1.47402	NonGM_StageII up vs NonGM_StageV	0.610385	1	0.884542	1.14274
OTU_96	0.235878	1	0.107305	0.0682817	1	0.131505	0.490194	-2.04001	NonGM_StageI down vs NonGM_StageII	0.0548566	1	0.121904	0.47019	-2.1268	NonGM_StageI down vs NonGM_StageIII	0.0463442	1	0.0620682	0.455622	-2.1948	NonGM_StageI down vs NonGM_StageIV	0.202182	1	0.234968	0.614318	-1.62782	NonGM_StageI down vs NonGM_StageV	0.90589	1	0.886403	0.959192	-1.04254	NonGM_StageII down vs NonGM_StageIII	0.835659	1	0.73556	0.929474	-1.07588	NonGM_StageII down vs NonGM_StageIV	0.524056	1	0.667683	1.25322	1.25322	NonGM_StageII up vs NonGM_StageV	0.928834	1	0.920826	0.969018
OTU_196	0.236129	1	0.107305	0.171862	1	0.216254	1.6261	1.6261	NonGM_StageI up vs NonGM_StageII	0.747953	1	0.415529	1.11812	1.11812	NonGM_StageI up vs NonGM_StageIII	0.353548	1	0.243317	1.38493	1.38493	NonGM_StageI up vs NonGM_StageIV	0.487664	1	0.345081	0.784766	-1.27427	NonGM_StageI down vs NonGM_StageV	0.260372	1	0.69092	0.687607	-1.45432	NonGM_StageII down vs NonGM_StageIII	0.624712	1	0.670038	0.851686	-1.17414	NonGM_StageII down vs NonGM_StageIV	0.0360013	1	0.2145	0.482606	-2.07208	NonGM_StageII down vs NonGM_StageV	0.515383	1	0.865714	1.23862
OTU_112	0.236559	1	0.107305	0.04912	1	0.109156	0.557803	-1.79275	NonGM_StageI down vs NonGM_StageII	0.110049	1	0.163996	0.627796	-1.59288	NonGM_StageI down vs NonGM_StageIII	0.40591	1	0.264724	0.789737	-1.26624	NonGM_StageI down vs NonGM_StageIV	0.0704075	1	0.121101	0.587217	-1.70295	NonGM_StageI down vs NonGM_StageV	0.656759	1	0.833081	1.12548	1.12548	NonGM_StageII up vs NonGM_StageIII	0.199931	1	0.444902	1.4158	1.4158	NonGM_StageII up vs NonGM_StageIV	0.846485	1	0.775597	1.05273	1.05273	NonGM_StageII up vs NonGM_StageV	0.391723	1	0.782842	1.25795
OTU_90	0.239133	1	0.107366	0.15961	1	0.206461	1.92922	1.92922	NonGM_StageI up vs NonGM_StageII	0.153321	1	0.194408	1.9498	1.9498	NonGM_StageI up vs NonGM_StageIII	0.026629	1	0.0424932	2.94127	2.94127	NonGM_StageI up vs NonGM_StageIV	0.303945	1	0.277409	1.60694	1.60694	NonGM_StageI up vs NonGM_StageV	0.980262	1	0.886403	1.01067	1.01067	NonGM_StageII up vs NonGM_StageIII	0.331578	1	0.506984	1.52459	1.52459	NonGM_StageII up vs NonGM_StageIV	0.670709	1	0.742571	0.83295	-1.20055	NonGM_StageII down vs NonGM_StageV	0.343588	1	0.782842	1.5085
OTU_444	0.246088	1	0.109372	0.0646703	1	0.130249	0.443791	-2.25332	NonGM_StageI down vs NonGM_StageII	0.282719	1	0.264158	0.63258	-1.58083	NonGM_StageI down vs NonGM_StageIII	1	1	0.451807	1	1	No change between NonGM_StageI and NonGM_StageIV	0.579212	1	0.377365	0.791593	-1.26328	NonGM_StageI down vs NonGM_StageV	0.37545	1	0.709771	1.4254	1.4254	NonGM_StageII up vs NonGM_StageIII	0.0512785	1	0.213003	2.25332	2.25332	NonGM_StageII up vs NonGM_StageIV	0.154787	1	0.419466	1.78371	1.78371	NonGM_StageII up vs NonGM_StageV	0.255438	1	0.729702	1.58083
OTU_227	0.256546	1	0.112242	0.289993	1	0.288373	1.75216	1.75216	NonGM_StageI up vs NonGM_StageII	0.97395	1	0.49129	0.983096	-1.01719	NonGM_StageI down vs NonGM_StageIII	0.0713987	1	0.0892483	2.67498	2.67498	NonGM_StageI up vs NonGM_StageIV	0.30644	1	0.277409	1.71864	1.71864	NonGM_StageI up vs NonGM_StageV	0.248853	1	0.690884	0.561077	-1.78229	NonGM_StageII down vs NonGM_StageIII	0.394658	1	0.547414	1.52667	1.52667	NonGM_StageII up vs NonGM_StageIV	0.968701	1	0.800344	0.980872	-1.0195	NonGM_StageII down vs NonGM_StageV	0.053306	1	0.38801	2.72097
OTU_225	0.257646	1	0.112242	0.472536	1	0.350415	1.31883	1.31883	NonGM_StageI up vs NonGM_StageII	0.248599	1	0.258739	0.637996	-1.56741	NonGM_StageI down vs NonGM_StageIII	0.671791	1	0.357336	0.850027	-1.17643	NonGM_StageI down vs NonGM_StageIV	0.514261	1	0.351003	1.28526	1.28526	NonGM_StageI up vs NonGM_StageV	0.0555118	1	0.47738	0.483758	-2.06715	NonGM_StageII down vs NonGM_StageIII	0.232303	1	0.467539	0.64453	-1.55152	NonGM_StageII down vs NonGM_StageIV	0.943007	1	0.800344	0.974541	-1.02612	NonGM_StageII down vs NonGM_StageV	0.430197	1	0.782842	1.33234
OTU_304	0.280331	1	0.120927	0.47306	1	0.350415	1.21624	1.21624	NonGM_StageI up vs NonGM_StageII	0.58038	1	0.362772	0.860359	-1.16231	NonGM_StageI down vs NonGM_StageIII	0.339886	1	0.240485	0.769673	-1.29925	NonGM_StageI down vs NonGM_StageIV	0.436655	1	0.332321	1.23675	1.23675	NonGM_StageI up vs NonGM_StageV	0.185724	1	0.681253	0.707394	-1.41364	NonGM_StageII down vs NonGM_StageIII	0.0853666	1	0.302779	0.632832	-1.5802	NonGM_StageII down vs NonGM_StageIV	0.947807	1	0.800344	1.01686	1.01686	NonGM_StageII up vs NonGM_StageV	0.663622	1	0.884542	0.894595
OTU_47	0.285574	1	0.121665	0.522374	1	0.359305	0.73052	-1.36889	NonGM_StageI down vs NonGM_StageII	0.0732941	1	0.130421	0.401163	-2.49275	NonGM_StageI down vs NonGM_StageIII	0.0764529	1	0.0910154	0.405489	-2.46616	NonGM_StageI down vs NonGM_StageIV	0.34225	1	0.288548	0.625439	-1.59888	NonGM_StageI down vs NonGM_StageV	0.202657	1	0.681253	0.549147	-1.82101	NonGM_StageII down vs NonGM_StageIII	0.210512	1	0.460228	0.555069	-1.80158	NonGM_StageII down vs NonGM_StageIV	0.736175	1	0.758187	0.856156	-1.16801	NonGM_StageII down vs NonGM_StageV	0.981405	1	0.920826	1.01078
OTU_128	0.288572	1	0.121665	0.198421	1	0.235568	0.541768	-1.84581	NonGM_StageI down vs NonGM_StageII	0.121465	1	0.169274	0.474439	-2.10775	NonGM_StageI down vs NonGM_StageIII	0.227152	1	0.185178	0.563238	-1.77545	NonGM_StageI down vs NonGM_StageIV	0.0346776	1	0.0846285	0.351207	-2.84733	NonGM_StageI down vs NonGM_StageV	0.76291	1	0.867209	0.875724	-1.14191	NonGM_StageII down vs NonGM_StageIII	0.929523	1	0.745786	1.03963	1.03963	NonGM_StageII up vs NonGM_StageIV	0.330062	1	0.556269	0.64826	-1.54259	NonGM_StageII down vs NonGM_StageV	0.696768	1	0.894919	1.18717
OTU_325	0.290383	1	0.121665	0.539123	1	0.367905	0.752567	-1.32879	NonGM_StageI down vs NonGM_StageII	0.451563	1	0.334491	0.70515	-1.41814	NonGM_StageI down vs NonGM_StageIII	0.128377	1	0.128377	0.485498	-2.05974	NonGM_StageI down vs NonGM_StageIV	0.0568601	1	0.105113	0.397898	-2.51321	NonGM_StageI down vs NonGM_StageV	0.880888	1	0.886403	0.936993	-1.06724	NonGM_StageII down vs NonGM_StageIII	0.319213	1	0.497236	0.645123	-1.55009	NonGM_StageII down vs NonGM_StageIV	0.153362	1	0.419466	0.528721	-1.89136	NonGM_StageII down vs NonGM_StageV	0.394624	1	0.782842	0.688503
OTU_70	0.293124	1	0.121665	0.322647	1	0.292435	0.708622	-1.41119	NonGM_StageI down vs NonGM_StageII	0.114822	1	0.164692	0.570878	-1.75169	NonGM_StageI down vs NonGM_StageIII	0.0443424	1	0.060467	0.48171	-2.07594	NonGM_StageI down vs NonGM_StageIV	0.365183	1	0.299102	0.730024	-1.36982	NonGM_StageI down vs NonGM_StageV	0.507249	1	0.780581	0.805617	-1.24128	NonGM_StageII down vs NonGM_StageIII	0.242256	1	0.467539	0.679784	-1.47105	NonGM_StageII down vs NonGM_StageIV	0.926844	1	0.800344	1.0302	1.0302	NonGM_StageII up vs NonGM_StageV	0.601522	1	0.884542	0.843806
OTU_619	0.29643	1	0.121665	0.707257	1	0.43472	0.848835	-1.17809	NonGM_StageI down vs NonGM_StageII	0.298676	1	0.268235	1.58304	1.58304	NonGM_StageI up vs NonGM_StageIII	0.203337	1	0.174938	1.76188	1.76188	NonGM_StageI up vs NonGM_StageIV	0.233335	1	0.250835	1.69758	1.69758	NonGM_StageI up vs NonGM_StageV	0.14061	1	0.679416	1.86495	1.86495	NonGM_StageII up vs NonGM_StageIII	0.0874694	1	0.302779	2.07565	2.07565	NonGM_StageII up vs NonGM_StageIV	0.103535	1	0.377843	1.9999	1.9999	NonGM_StageII up vs NonGM_StageV	0.794553	1	0.896232	1.11298
OTU_399	0.298632	1	0.121665	0.0761377	1	0.140396	2.01036	2.01036	NonGM_StageI up vs NonGM_StageII	0.0761377	1	0.130421	2.01036	2.01036	NonGM_StageI up vs NonGM_StageIII	0.0761377	1	0.0910154	2.01036	2.01036	NonGM_StageI up vs NonGM_StageIV	0.0761377	1	0.128389	2.01036	2.01036	NonGM_StageI up vs NonGM_StageV	1	1	0.886403	1	1	No change between NonGM_StageII and NonGM_StageIII	1	1	0.750695	1	1	No change between NonGM_StageII and NonGM_StageIV	1	1	0.800344	1	1	No change between NonGM_StageII and NonGM_StageV	1	1	0.920826	1
OTU_189	0.314095	1	0.12679	0.743933	1	0.443713	0.855142	-1.1694	NonGM_StageI down vs NonGM_StageII	0.480662	1	0.338215	0.712025	-1.40444	NonGM_StageI down vs NonGM_StageIII	0.0945506	1	0.10584	0.435696	-2.29518	NonGM_StageI down vs NonGM_StageIV	0.120205	1	0.178348	0.463864	-2.1558	NonGM_StageI down vs NonGM_StageV	0.685338	1	0.854598	0.83264	-1.201	NonGM_StageII down vs NonGM_StageIII	0.14626	1	0.408352	0.509502	-1.9627	NonGM_StageII down vs NonGM_StageIV	0.185389	1	0.43986	0.542441	-1.84352	NonGM_StageII down vs NonGM_StageV	0.283622	1	0.736479	0.611911
OTU_551	0.330201	1	0.13208	0.109002	1	0.176914	0.498311	-2.00678	NonGM_StageI down vs NonGM_StageII	0.385213	1	0.301648	0.692015	-1.44506	NonGM_StageI down vs NonGM_StageIII	0.962608	1	0.451807	1.01987	1.01987	NonGM_StageI up vs NonGM_StageIV	0.917258	1	0.505655	0.957331	-1.04457	NonGM_StageI down vs NonGM_StageV	0.410856	1	0.746352	1.38872	1.38872	NonGM_StageII up vs NonGM_StageIII	0.0823605	1	0.301864	2.04665	2.04665	NonGM_StageII up vs NonGM_StageIV	0.110915	1	0.377843	1.92115	1.92115	NonGM_StageII up vs NonGM_StageV	0.33313	1	0.782842	1.47377
OTU_31	0.341193	1	0.135248	0.0479692	1	0.109156	0.541751	-1.84587	NonGM_StageI down vs NonGM_StageII	0.258872	1	0.259573	0.713567	-1.40141	NonGM_StageI down vs NonGM_StageIII	0.461978	1	0.284236	0.804371	-1.24321	NonGM_StageI down vs NonGM_StageIV	0.390279	1	0.310778	0.774973	-1.29037	NonGM_StageI down vs NonGM_StageV	0.326272	1	0.709771	1.31715	1.31715	NonGM_StageII up vs NonGM_StageIII	0.164514	1	0.41002	1.48476	1.48476	NonGM_StageII up vs NonGM_StageIV	0.20593	1	0.471712	1.4305	1.4305	NonGM_StageII up vs NonGM_StageV	0.666202	1	0.884542	1.12725
OTU_40	0.353163	1	0.138743	0.840718	1	0.477603	0.951792	-1.05065	NonGM_StageI down vs NonGM_StageII	0.54835	1	0.349508	1.15975	1.15975	NonGM_StageI up vs NonGM_StageIII	0.450248	1	0.28377	0.829489	-1.20556	NonGM_StageI down vs NonGM_StageIV	0.215191	1	0.237262	0.732757	-1.36471	NonGM_StageI down vs NonGM_StageV	0.398195	1	0.741665	1.21849	1.21849	NonGM_StageII up vs NonGM_StageIII	0.55458	1	0.635478	0.871503	-1.14744	NonGM_StageII down vs NonGM_StageIV	0.266876	1	0.528003	0.769871	-1.29892	NonGM_StageII down vs NonGM_StageV	0.159038	1	0.694572	0.715232
OTU_263	0.356511	1	0.138818	0.62968	1	0.416582	1.19433	1.19433	NonGM_StageI up vs NonGM_StageII	0.658879	1	0.400128	0.850011	-1.17645	NonGM_StageI down vs NonGM_StageIII	0.160306	1	0.144855	1.69801	1.69801	NonGM_StageI up vs NonGM_StageIV	0.469891	1	0.345081	1.30629	1.30629	NonGM_StageI up vs NonGM_StageV	0.332	1	0.709771	0.711707	-1.40507	NonGM_StageII down vs NonGM_StageIII	0.315945	1	0.497236	1.42173	1.42173	NonGM_StageII up vs NonGM_StageIV	0.795909	1	0.765039	1.09375	1.09375	NonGM_StageII up vs NonGM_StageV	0.0570946	1	0.396696	1.99763
OTU_93	0.365732	1	0.14116	0.122462	1	0.18244	0.712247	-1.40401	NonGM_StageI down vs NonGM_StageII	0.680797	1	0.40112	0.91604	-1.09166	NonGM_StageI down vs NonGM_StageIII	0.811973	1	0.398026	1.05194	1.05194	NonGM_StageI up vs NonGM_StageIV	0.50234	1	0.347562	0.866283	-1.15436	NonGM_StageI down vs NonGM_StageV	0.218905	1	0.681253	1.28613	1.28613	NonGM_StageII up vs NonGM_StageIII	0.0635374	1	0.239931	1.47693	1.47693	NonGM_StageII up vs NonGM_StageIV	0.334958	1	0.556269	1.21627	1.21627	NonGM_StageII up vs NonGM_StageV	0.493045	1	0.85461	1.14835
OTU_229	0.380445	1	0.145562	0.157064	1	0.206246	1.50302	1.50302	NonGM_StageI up vs NonGM_StageII	0.369398	1	0.297772	1.28956	1.28956	NonGM_StageI up vs NonGM_StageIII	0.0609798	1	0.0775166	1.73476	1.73476	NonGM_StageI up vs NonGM_StageIV	0.37886	1	0.304504	1.28301	1.28301	NonGM_StageI up vs NonGM_StageV	0.563855	1	0.813405	0.857981	-1.16553	NonGM_StageII down vs NonGM_StageIII	0.5888	1	0.661022	1.15418	1.15418	NonGM_StageII up vs NonGM_StageIV	0.551087	1	0.673689	0.853623	-1.17148	NonGM_StageII down vs NonGM_StageV	0.269558	1	0.729702	1.34523
OTU_126	0.397487	1	0.150771	0.0661263	1	0.130249	0.444152	-2.25148	NonGM_StageI down vs NonGM_StageII	0.167564	1	0.197793	0.550291	-1.81722	NonGM_StageI down vs NonGM_StageIII	0.240599	1	0.187968	0.603955	-1.65575	NonGM_StageI down vs NonGM_StageIV	0.120281	1	0.178348	0.50808	-1.96819	NonGM_StageI down vs NonGM_StageV	0.591421	1	0.828639	1.23897	1.23897	NonGM_StageII up vs NonGM_StageIII	0.443219	1	0.569401	1.35979	1.35979	NonGM_StageII up vs NonGM_StageIV	0.735629	1	0.758187	1.14393	1.14393	NonGM_StageII up vs NonGM_StageV	0.815113	1	0.896232	1.09752
OTU_287	0.401883	1	0.151135	0.139957	1	0.189525	0.519728	-1.92408	NonGM_StageI down vs NonGM_StageII	0.0991661	1	0.156801	0.478744	-2.0888	NonGM_StageI down vs NonGM_StageIII	0.209232	1	0.176319	0.575672	-1.7371	NonGM_StageI down vs NonGM_StageIV	0.0804581	1	0.133065	0.456346	-2.19132	NonGM_StageI down vs NonGM_StageV	0.839705	1	0.886403	0.921143	-1.08561	NonGM_StageII down vs NonGM_StageIII	0.801297	1	0.724821	1.10764	1.10764	NonGM_StageII up vs NonGM_StageIV	0.748972	1	0.759438	0.878048	-1.13889	NonGM_StageII down vs NonGM_StageV	0.650539	1	0.884542	1.20246
OTU_32	0.409658	1	0.151606	0.650342	1	0.420619	0.83433	-1.19857	NonGM_StageI down vs NonGM_StageII	0.52331	1	0.346998	0.774351	-1.2914	NonGM_StageI down vs NonGM_StageIII	0.489342	1	0.295652	1.31952	1.31952	NonGM_StageI up vs NonGM_StageIV	0.287692	1	0.274595	0.650389	-1.53754	NonGM_StageI down vs NonGM_StageV	0.842675	1	0.886403	0.928111	-1.07746	NonGM_StageII down vs NonGM_StageIII	0.231413	1	0.467539	1.58154	1.58154	NonGM_StageII up vs NonGM_StageIV	0.509852	1	0.666202	0.779535	-1.28282	NonGM_StageII down vs NonGM_StageV	0.16684	1	0.700854	1.70404
OTU_424	0.410026	1	0.151606	0.080207	1	0.142646	1.93086	1.93086	NonGM_StageI up vs NonGM_StageII	0.554517	1	0.35072	1.23887	1.23887	NonGM_StageI up vs NonGM_StageIII	0.34595	1	0.242489	1.41068	1.41068	NonGM_StageI up vs NonGM_StageIV	0.170656	1	0.212702	1.66025	1.66025	NonGM_StageI up vs NonGM_StageV	0.201827	1	0.681253	0.641613	-1.55857	NonGM_StageII down vs NonGM_StageIII	0.361436	1	0.517707	0.730599	-1.36874	NonGM_StageII down vs NonGM_StageIV	0.657903	1	0.735392	0.859852	-1.16299	NonGM_StageII down vs NonGM_StageV	0.703095	1	0.894919	1.13869
OTU_448	0.418189	1	0.153336	0.129564	1	0.18408	1.81208	1.81208	NonGM_StageI up vs NonGM_StageII	0.864204	1	0.455563	1.0672	1.0672	NonGM_StageI up vs NonGM_StageIII	0.270939	1	0.203204	1.5302	1.5302	NonGM_StageI up vs NonGM_StageIV	0.800792	1	0.475793	1.10076	1.10076	NonGM_StageI up vs NonGM_StageV	0.150865	1	0.681253	0.588934	-1.69798	NonGM_StageII down vs NonGM_StageIII	0.638092	1	0.670038	0.844443	-1.18421	NonGM_StageII down vs NonGM_StageIV	0.174904	1	0.438438	0.607453	-1.64622	NonGM_StageII down vs NonGM_StageV	0.321089	1	0.782842	1.43385
OTU_1416	0.447927	1	0.161395	0.238945	1	0.260576	0.746574	-1.33945	NonGM_StageI down vs NonGM_StageII	0.0830872	1	0.139421	0.644204	-1.5523	NonGM_StageI down vs NonGM_StageIII	0.226722	1	0.185178	0.740587	-1.35028	NonGM_StageI down vs NonGM_StageIV	0.528332	1	0.357768	0.856925	-1.16696	NonGM_StageI down vs NonGM_StageV	0.523006	1	0.785234	0.86288	-1.15891	NonGM_StageII down vs NonGM_StageIII	0.972029	1	0.750695	0.991981	-1.00808	NonGM_StageII down vs NonGM_StageIV	0.55021	1	0.673689	1.14781	1.14781	NonGM_StageII up vs NonGM_StageV	0.545713	1	0.878065	1.14962
OTU_630	0.450885	1	0.161395	0.137311	1	0.188894	1.34083	1.34083	NonGM_StageI up vs NonGM_StageII	0.137311	1	0.185083	1.34083	1.34083	NonGM_StageI up vs NonGM_StageIII	0.137311	1	0.13075	1.34083	1.34083	NonGM_StageI up vs NonGM_StageIV	0.471537	1	0.345081	1.14899	1.14899	NonGM_StageI up vs NonGM_StageV	1	1	0.886403	1	1	No change between NonGM_StageII and NonGM_StageIII	1	1	0.750695	1	1	No change between NonGM_StageII and NonGM_StageIV	0.397142	1	0.606473	0.856925	-1.16696	NonGM_StageII down vs NonGM_StageV	1	1	0.920826	1
OTU_19	0.458409	1	0.161395	0.679436	1	0.432974	1.18914	1.18914	NonGM_StageI up vs NonGM_StageII	0.116175	1	0.164692	1.97288	1.97288	NonGM_StageI up vs NonGM_StageIII	0.765046	1	0.38509	1.13332	1.13332	NonGM_StageI up vs NonGM_StageIV	0.283161	1	0.274595	1.57763	1.57763	NonGM_StageI up vs NonGM_StageV	0.208856	1	0.681253	1.65909	1.65909	NonGM_StageII up vs NonGM_StageIII	0.902968	1	0.745786	0.953055	-1.04926	NonGM_StageII down vs NonGM_StageIV	0.476452	1	0.652578	1.3267	1.3267	NonGM_StageII up vs NonGM_StageV	0.17054	1	0.700854	0.574446
OTU_188	0.462175	1	0.161395	1	1	0.522088	1	1	No change between NonGM_StageI and NonGM_StageII	0.16255	1	0.196547	0.862484	-1.15944	NonGM_StageI down vs NonGM_StageIII	1	1	0.451807	1	1	No change between NonGM_StageI and NonGM_StageIV	1	1	0.518072	1	1	No change between NonGM_StageI and NonGM_StageV	0.139782	1	0.679416	0.862484	-1.15944	NonGM_StageII down vs NonGM_StageIII	1	1	0.750695	1	1	No change between NonGM_StageII and NonGM_StageIV	1	1	0.800344	1	1	No change between NonGM_StageII and NonGM_StageV	0.139782	1	0.6661	1.15944
OTU_413	0.462175	1	0.161395	1	1	0.522088	1	1	No change between NonGM_StageI and NonGM_StageII	1	1	0.495315	1	1	No change between NonGM_StageI and NonGM_StageIII	1	1	0.451807	1	1	No change between NonGM_StageI and NonGM_StageIV	0.16255	1	0.208646	0.863074	-1.15865	NonGM_StageI down vs NonGM_StageV	1	1	0.886403	1	1	No change between NonGM_StageII and NonGM_StageIII	1	1	0.750695	1	1	No change between NonGM_StageII and NonGM_StageIV	0.139782	1	0.419466	0.863074	-1.15865	NonGM_StageII down vs NonGM_StageV	1	1	0.920826	1
OTU_734	0.462175	1	0.161395	1	1	0.522088	1	1	No change between NonGM_StageI and NonGM_StageII	0.16255	1	0.196547	0.862484	-1.15944	NonGM_StageI down vs NonGM_StageIII	1	1	0.451807	1	1	No change between NonGM_StageI and NonGM_StageIV	1	1	0.518072	1	1	No change between NonGM_StageI and NonGM_StageV	0.139782	1	0.679416	0.862484	-1.15944	NonGM_StageII down vs NonGM_StageIII	1	1	0.750695	1	1	No change between NonGM_StageII and NonGM_StageIV	1	1	0.800344	1	1	No change between NonGM_StageII and NonGM_StageV	0.139782	1	0.6661	1.15944
OTU_604	0.471989	1	0.163366	0.357994	1	0.31475	1.30523	1.30523	NonGM_StageI up vs NonGM_StageII	0.0881739	1	0.144997	1.6624	1.6624	NonGM_StageI up vs NonGM_StageIII	0.318552	1	0.228736	1.33595	1.33595	NonGM_StageI up vs NonGM_StageIV	0.152307	1	0.198461	1.52452	1.52452	NonGM_StageI up vs NonGM_StageV	0.375605	1	0.709771	1.27365	1.27365	NonGM_StageII up vs NonGM_StageIII	0.931377	1	0.745786	1.02354	1.02354	NonGM_StageII up vs NonGM_StageIV	0.567052	1	0.678711	1.16801	1.16801	NonGM_StageII up vs NonGM_StageV	0.422355	1	0.782842	0.803626
OTU_2435	0.478552	1	0.163366	0.440585	1	0.348203	0.858095	-1.16537	NonGM_StageI down vs NonGM_StageII	0.455738	1	0.334569	0.862484	-1.15944	NonGM_StageI down vs NonGM_StageIII	1	1	0.451807	1	1	No change between NonGM_StageI and NonGM_StageIV	0.135746	1	0.187523	0.73883	-1.35349	NonGM_StageI down vs NonGM_StageV	0.978071	1	0.886403	1.00511	1.00511	NonGM_StageII up vs NonGM_StageIII	0.413826	1	0.554506	1.16537	1.16537	NonGM_StageII up vs NonGM_StageIV	0.424072	1	0.623158	0.861011	-1.16142	NonGM_StageII down vs NonGM_StageV	0.429295	1	0.782842	1.15944
OTU_21	0.47896	1	0.163366	0.725351	1	0.436554	0.881879	-1.13394	NonGM_StageI down vs NonGM_StageII	0.223045	1	0.241306	0.641414	-1.55906	NonGM_StageI down vs NonGM_StageIII	0.143972	1	0.134973	0.584334	-1.71135	NonGM_StageI down vs NonGM_StageIV	0.21106	1	0.237262	0.633621	-1.57823	NonGM_StageI down vs NonGM_StageV	0.350151	1	0.709771	0.727327	-1.3749	NonGM_StageII down vs NonGM_StageIII	0.230688	1	0.467539	0.662601	-1.5092	NonGM_StageII down vs NonGM_StageIV	0.332398	1	0.556269	0.71849	-1.39181	NonGM_StageII down vs NonGM_StageV	0.782192	1	0.896232	0.911009
OTU_214	0.495748	1	0.16699	0.441951	1	0.348203	0.699149	-1.43031	NonGM_StageI down vs NonGM_StageII	0.294698	1	0.268235	0.611953	-1.63411	NonGM_StageI down vs NonGM_StageIII	0.0810369	1	0.0949651	0.431814	-2.31581	NonGM_StageI down vs NonGM_StageIV	0.334185	1	0.284553	0.63662	-1.5708	NonGM_StageI down vs NonGM_StageV	0.759914	1	0.867209	0.875283	-1.14249	NonGM_StageII down vs NonGM_StageIII	0.276051	1	0.473516	0.617629	-1.6191	NonGM_StageII down vs NonGM_StageIV	0.82971	1	0.765506	0.910564	-1.09822	NonGM_StageII down vs NonGM_StageV	0.427146	1	0.782842	0.705633
OTU_312	0.497175	1	0.16699	0.721035	1	0.436554	0.820238	-1.21916	NonGM_StageI down vs NonGM_StageII	0.383083	1	0.301648	0.613726	-1.62939	NonGM_StageI down vs NonGM_StageIII	0.51866	1	0.304046	1.43272	1.43272	NonGM_StageI up vs NonGM_StageIV	0.456095	1	0.341823	0.659681	-1.51588	NonGM_StageI down vs NonGM_StageV	0.580251	1	0.822672	0.74823	-1.33649	NonGM_StageII down vs NonGM_StageIII	0.292822	1	0.483943	1.74671	1.74671	NonGM_StageII up vs NonGM_StageIV	0.677347	1	0.743722	0.804256	-1.24339	NonGM_StageII down vs NonGM_StageV	0.116499	1	0.6661	2.33446
OTU_306	0.501219	1	0.167073	0.201161	1	0.235594	0.529694	-1.88788	NonGM_StageI down vs NonGM_StageII	0.17915	1	0.207466	0.512021	-1.95305	NonGM_StageI down vs NonGM_StageIII	0.833315	1	0.403217	0.902675	-1.10782	NonGM_StageI down vs NonGM_StageIV	0.626632	1	0.399188	0.788754	-1.26782	NonGM_StageI down vs NonGM_StageV	0.940997	1	0.886403	0.966634	-1.03452	NonGM_StageII down vs NonGM_StageIII	0.253275	1	0.471073	1.70414	1.70414	NonGM_StageII up vs NonGM_StageIV	0.389856	1	0.602269	1.48907	1.48907	NonGM_StageII up vs NonGM_StageV	0.225346	1	0.726875	1.76297
OTU_223	0.514899	1	0.16843	0.775067	1	0.450822	0.858095	-1.16537	NonGM_StageI down vs NonGM_StageII	1	1	0.495315	1	1	No change between NonGM_StageI and NonGM_StageIII	0.170731	1	0.152439	0.47155	-2.12067	NonGM_StageI down vs NonGM_StageIV	1	1	0.518072	1	1	No change between NonGM_StageI and NonGM_StageV	0.761855	1	0.867209	1.16537	1.16537	NonGM_StageII up vs NonGM_StageIII	0.243871	1	0.467539	0.549531	-1.81973	NonGM_StageII down vs NonGM_StageIV	0.761855	1	0.759438	1.16537	1.16537	NonGM_StageII up vs NonGM_StageV	0.147463	1	0.6661	0.47155
OTU_119	0.515147	1	0.16843	0.886106	1	0.489146	0.935406	-1.06905	NonGM_StageI down vs NonGM_StageII	0.685947	1	0.40112	0.82789	-1.20789	NonGM_StageI down vs NonGM_StageIII	0.801633	1	0.398026	0.889414	-1.12434	NonGM_StageI down vs NonGM_StageIV	0.137371	1	0.187523	0.489935	-2.04109	NonGM_StageI down vs NonGM_StageV	0.781333	1	0.877615	0.885059	-1.12987	NonGM_StageII down vs NonGM_StageIII	0.90867	1	0.745786	0.950833	-1.05171	NonGM_StageII down vs NonGM_StageIV	0.152317	1	0.419466	0.523767	-1.90925	NonGM_StageII down vs NonGM_StageV	0.870459	1	0.920826	1.07432
OTU_197	0.516775	1	0.16843	0.114314	1	0.176914	0.424439	-2.35605	NonGM_StageI down vs NonGM_StageII	0.293273	1	0.268235	0.571411	-1.75006	NonGM_StageI down vs NonGM_StageIII	0.261103	1	0.201149	0.548969	-1.8216	NonGM_StageI down vs NonGM_StageIV	0.636702	1	0.40262	0.779947	-1.28214	NonGM_StageI down vs NonGM_StageV	0.549664	1	0.806184	1.34627	1.34627	NonGM_StageII up vs NonGM_StageIII	0.604268	1	0.66406	1.2934	1.2934	NonGM_StageII up vs NonGM_StageIV	0.227748	1	0.503032	1.83759	1.83759	NonGM_StageII up vs NonGM_StageV	0.935445	1	0.920826	0.960726
OTU_193	0.529118	1	0.171185	0.1242	1	0.18244	0.499592	-2.00163	NonGM_StageI down vs NonGM_StageII	0.368307	1	0.297772	0.671944	-1.48822	NonGM_StageI down vs NonGM_StageIII	0.395891	1	0.260454	0.687468	-1.45461	NonGM_StageI down vs NonGM_StageIV	0.146461	1	0.193779	0.520377	-1.92168	NonGM_StageI down vs NonGM_StageV	0.475086	1	0.770405	1.34499	1.34499	NonGM_StageII up vs NonGM_StageIII	0.442229	1	0.569401	1.37606	1.37606	NonGM_StageII up vs NonGM_StageIV	0.921225	1	0.800344	1.0416	1.0416	NonGM_StageII up vs NonGM_StageV	0.955805	1	0.920826	1.0231
OTU_237	0.565623	1	0.18166	1	1	0.522088	1	1	No change between NonGM_StageI and NonGM_StageII	1	1	0.495315	1	1	No change between NonGM_StageI and NonGM_StageIII	0.564619	1	0.313677	0.786241	-1.27187	NonGM_StageI down vs NonGM_StageIV	0.199442	1	0.234959	0.579619	-1.72527	NonGM_StageI down vs NonGM_StageV	1	1	0.886403	1	1	No change between NonGM_StageII and NonGM_StageIII	0.541467	1	0.635478	0.786241	-1.27187	NonGM_StageII down vs NonGM_StageIV	0.174672	1	0.438438	0.579619	-1.72527	NonGM_StageII down vs NonGM_StageV	0.541467	1	0.878065	0.786241
OTU_343	0.576871	1	0.18393	0.391389	1	0.329324	1.31987	1.31987	NonGM_StageI up vs NonGM_StageII	0.540487	1	0.349508	1.21803	1.21803	NonGM_StageI up vs NonGM_StageIII	0.551911	1	0.310877	0.825601	-1.21124	NonGM_StageI down vs NonGM_StageIV	0.80813	1	0.475793	1.08104	1.08104	NonGM_StageI up vs NonGM_StageV	0.790696	1	0.881404	0.922837	-1.08361	NonGM_StageII down vs NonGM_StageIII	0.132294	1	0.393324	0.625516	-1.59868	NonGM_StageII down vs NonGM_StageIV	0.511471	1	0.666202	0.819045	-1.22093	NonGM_StageII down vs NonGM_StageV	0.207971	1	0.722472	0.677818
OTU_149	0.604731	1	0.189386	0.274793	1	0.280181	0.558788	-1.78959	NonGM_StageI down vs NonGM_StageII	0.422748	1	0.324853	0.654398	-1.52812	NonGM_StageI down vs NonGM_StageIII	0.122367	1	0.124637	0.433078	-2.30906	NonGM_StageI down vs NonGM_StageIV	0.284126	1	0.274595	0.565274	-1.76906	NonGM_StageI down vs NonGM_StageV	0.7497	1	0.867209	1.1711	1.1711	NonGM_StageII up vs NonGM_StageIII	0.607492	1	0.66406	0.77503	-1.29027	NonGM_StageII down vs NonGM_StageIV	0.981378	1	0.800344	1.01161	1.01161	NonGM_StageII up vs NonGM_StageV	0.408076	1	0.782842	0.661795
OTU_717	0.606108	1	0.189386	1	1	0.522088	1	1	No change between NonGM_StageI and NonGM_StageII	0.314079	1	0.269003	0.862583	-1.15931	NonGM_StageI down vs NonGM_StageIII	0.32023	1	0.228736	0.864238	-1.15709	NonGM_StageI down vs NonGM_StageIV	1	1	0.518072	1	1	No change between NonGM_StageI and NonGM_StageV	0.28643	1	0.69092	0.862583	-1.15931	NonGM_StageII down vs NonGM_StageIII	0.292539	1	0.483943	0.864238	-1.15709	NonGM_StageII down vs NonGM_StageIV	1	1	0.800344	1	1	No change between NonGM_StageII and NonGM_StageV	0.988799	1	0.920826	1.00192
OTU_60	0.606897	1	0.189386	0.488761	1	0.355961	1.35777	1.35777	NonGM_StageI up vs NonGM_StageII	0.730919	1	0.415529	0.859678	-1.16323	NonGM_StageI down vs NonGM_StageIII	0.626499	1	0.340489	0.807105	-1.239	NonGM_StageI down vs NonGM_StageIV	0.480705	1	0.345081	0.732263	-1.36563	NonGM_StageI down vs NonGM_StageV	0.277089	1	0.69092	0.633153	-1.5794	NonGM_StageII down vs NonGM_StageIII	0.218201	1	0.467539	0.594433	-1.68228	NonGM_StageII down vs NonGM_StageIV	0.14705	1	0.419466	0.539311	-1.85422	NonGM_StageII down vs NonGM_StageV	0.878843	1	0.920826	0.938845
OTU_50	0.612825	1	0.189889	0.771337	1	0.450822	1.07376	1.07376	NonGM_StageI up vs NonGM_StageII	0.582397	1	0.362772	0.873677	-1.14459	NonGM_StageI down vs NonGM_StageIII	0.501501	1	0.298512	0.847555	-1.17986	NonGM_StageI down vs NonGM_StageIV	0.551231	1	0.364119	1.15772	1.15772	NonGM_StageI up vs NonGM_StageV	0.376247	1	0.709771	0.813662	-1.22901	NonGM_StageII down vs NonGM_StageIII	0.311647	1	0.497236	0.789335	-1.26689	NonGM_StageII down vs NonGM_StageIV	0.744407	1	0.759438	1.0782	1.0782	NonGM_StageII up vs NonGM_StageV	0.8953	1	0.920826	0.970102
OTU_108	0.637676	1	0.196208	0.469244	1	0.350415	0.734125	-1.36217	NonGM_StageI down vs NonGM_StageII	0.666699	1	0.400128	1.20093	1.20093	NonGM_StageI up vs NonGM_StageIII	0.518906	1	0.304046	1.31663	1.31663	NonGM_StageI up vs NonGM_StageIV	0.985921	1	0.518072	0.992545	-1.00751	NonGM_StageI down vs NonGM_StageV	0.227446	1	0.681253	1.63586	1.63586	NonGM_StageII up vs NonGM_StageIII	0.155159	1	0.408352	1.79347	1.79347	NonGM_StageII up vs NonGM_StageIV	0.454066	1	0.640525	1.35201	1.35201	NonGM_StageII up vs NonGM_StageV	0.818174	1	0.896232	1.09634
OTU_58	0.669474	1	0.204561	0.148884	1	0.198512	0.435369	-2.2969	NonGM_StageI down vs NonGM_StageII	0.449741	1	0.334491	0.652751	-1.53198	NonGM_StageI down vs NonGM_StageIII	0.298496	1	0.219482	0.553886	-1.80542	NonGM_StageI down vs NonGM_StageIV	0.355011	1	0.293566	0.592157	-1.68874	NonGM_StageI down vs NonGM_StageV	0.4466	1	0.755333	1.4993	1.4993	NonGM_StageII up vs NonGM_StageIII	0.649298	1	0.670038	1.27222	1.27222	NonGM_StageII up vs NonGM_StageIV	0.561973	1	0.678711	1.36013	1.36013	NonGM_StageII up vs NonGM_StageV	0.756063	1	0.896232	0.848542
OTU_43	0.676564	1	0.205302	0.477142	1	0.350443	0.722095	-1.38486	NonGM_StageI down vs NonGM_StageII	0.851737	1	0.454751	1.08878	1.08878	NonGM_StageI up vs NonGM_StageIII	0.555434	1	0.310877	0.763775	-1.30929	NonGM_StageI down vs NonGM_StageIV	0.302087	1	0.277409	0.621113	-1.61001	NonGM_StageI down vs NonGM_StageV	0.344139	1	0.709771	1.50781	1.50781	NonGM_StageII up vs NonGM_StageIII	0.895922	1	0.745786	1.05772	1.05772	NonGM_StageII up vs NonGM_StageIV	0.725839	1	0.758187	0.860155	-1.16258	NonGM_StageII down vs NonGM_StageV	0.412659	1	0.782842	0.701494
OTU_35	0.692457	1	0.206895	0.286395	1	0.288373	0.681749	-1.46682	NonGM_StageI down vs NonGM_StageII	0.306683	1	0.268257	0.692894	-1.44322	NonGM_StageI down vs NonGM_StageIII	0.615845	1	0.337142	0.836809	-1.19502	NonGM_StageI down vs NonGM_StageIV	0.206833	1	0.237168	0.633528	-1.57846	NonGM_StageI down vs NonGM_StageV	0.961236	1	0.886403	1.01635	1.01635	NonGM_StageII up vs NonGM_StageIII	0.541094	1	0.635478	1.22744	1.22744	NonGM_StageII up vs NonGM_StageIV	0.826084	1	0.765506	0.929269	-1.07611	NonGM_StageII down vs NonGM_StageV	0.573281	1	0.884542	1.2077
OTU_18	0.698125	1	0.206895	0.752605	1	0.443713	1.10604	1.10604	NonGM_StageI up vs NonGM_StageII	0.664817	1	0.400128	0.870492	-1.14877	NonGM_StageI down vs NonGM_StageIII	0.448609	1	0.28377	1.27613	1.27613	NonGM_StageI up vs NonGM_StageIV	0.505177	1	0.347562	1.23869	1.23869	NonGM_StageI up vs NonGM_StageV	0.430204	1	0.753588	0.787039	-1.27059	NonGM_StageII down vs NonGM_StageIII	0.635686	1	0.670038	1.15378	1.15378	NonGM_StageII up vs NonGM_StageIV	0.707257	1	0.758187	1.11993	1.11993	NonGM_StageII up vs NonGM_StageV	0.213388	1	0.722472	1.46598
OTU_1	0.698884	1	0.206895	0.799207	1	0.461764	0.959887	-1.04179	NonGM_StageI down vs NonGM_StageII	0.822897	1	0.448082	0.964626	-1.03667	NonGM_StageI down vs NonGM_StageIII	0.458306	1	0.284236	1.12766	1.12766	NonGM_StageI up vs NonGM_StageIV	0.492549	1	0.345081	1.11746	1.11746	NonGM_StageI up vs NonGM_StageV	0.974089	1	0.886403	1.00494	1.00494	NonGM_StageII up vs NonGM_StageIII	0.295146	1	0.483943	1.17478	1.17478	NonGM_StageII up vs NonGM_StageIV	0.322471	1	0.556269	1.16415	1.16415	NonGM_StageII up vs NonGM_StageV	0.309733	1	0.782842	1.16901
OTU_53	0.700621	1	0.206895	0.303163	1	0.288373	0.580086	-1.72388	NonGM_StageI down vs NonGM_StageII	0.774012	1	0.427121	0.860824	-1.16168	NonGM_StageI down vs NonGM_StageIII	0.262835	1	0.201149	0.552247	-1.81078	NonGM_StageI down vs NonGM_StageIV	0.329603	1	0.283458	0.59759	-1.67339	NonGM_StageI down vs NonGM_StageV	0.425933	1	0.753588	1.48396	1.48396	NonGM_StageII up vs NonGM_StageIII	0.920313	1	0.745786	0.952009	-1.05041	NonGM_StageII down vs NonGM_StageIV	0.951775	1	0.800344	1.03018	1.03018	NonGM_StageII up vs NonGM_StageV	0.371652	1	0.782842	0.641533
OTU_9	0.71715	1	0.207435	0.703792	1	0.43472	0.905932	-1.10384	NonGM_StageI down vs NonGM_StageII	0.920165	1	0.470271	0.97434	-1.02634	NonGM_StageI down vs NonGM_StageIII	0.656457	1	0.354203	1.12262	1.12262	NonGM_StageI up vs NonGM_StageIV	0.40006	1	0.312774	0.802258	-1.24648	NonGM_StageI down vs NonGM_StageV	0.766175	1	0.867209	1.07551	1.07551	NonGM_StageII up vs NonGM_StageIII	0.385268	1	0.545572	1.23918	1.23918	NonGM_StageII up vs NonGM_StageIV	0.620295	1	0.710437	0.885561	-1.12923	NonGM_StageII down vs NonGM_StageV	0.564088	1	0.884542	1.15218
OTU_170	0.719872	1	0.207435	0.233249	1	0.259259	0.736513	-1.35775	NonGM_StageI down vs NonGM_StageII	0.434062	1	0.327427	0.819955	-1.21958	NonGM_StageI down vs NonGM_StageIII	0.377706	1	0.255207	0.799033	-1.25151	NonGM_StageI down vs NonGM_StageIV	0.813274	1	0.475793	0.942244	-1.0613	NonGM_StageI down vs NonGM_StageV	0.651945	1	0.833081	1.11329	1.11329	NonGM_StageII up vs NonGM_StageIII	0.731729	1	0.709716	1.08489	1.08489	NonGM_StageII up vs NonGM_StageIV	0.306036	1	0.549447	1.27933	1.27933	NonGM_StageII up vs NonGM_StageV	0.913272	1	0.920826	0.974484
OTU_11	0.721412	1	0.207435	0.226098	1	0.257831	0.683343	-1.46339	NonGM_StageI down vs NonGM_StageII	0.239548	1	0.255794	0.691053	-1.44707	NonGM_StageI down vs NonGM_StageIII	0.35362	1	0.243317	0.748721	-1.33561	NonGM_StageI down vs NonGM_StageIV	0.260669	1	0.266876	0.702682	-1.42312	NonGM_StageI down vs NonGM_StageV	0.969219	1	0.886403	1.01128	1.01128	NonGM_StageII up vs NonGM_StageIII	0.753636	1	0.716906	1.09567	1.09567	NonGM_StageII up vs NonGM_StageIV	0.92354	1	0.800344	1.0283	1.0283	NonGM_StageII up vs NonGM_StageV	0.783013	1	0.896232	1.08345
OTU_13	0.724221	1	0.207435	0.298176	1	0.288373	1.67022	1.67022	NonGM_StageI up vs NonGM_StageII	0.924737	1	0.470271	0.95513	-1.04698	NonGM_StageI down vs NonGM_StageIII	0.590272	1	0.325518	1.30037	1.30037	NonGM_StageI up vs NonGM_StageIV	0.927253	1	0.505655	1.04537	1.04537	NonGM_StageI up vs NonGM_StageV	0.231494	1	0.681253	0.57186	-1.74868	NonGM_StageII down vs NonGM_StageIII	0.586301	1	0.661022	0.778565	-1.28441	NonGM_StageII down vs NonGM_StageIV	0.313024	1	0.554499	0.625887	-1.59773	NonGM_StageII down vs NonGM_StageV	0.503182	1	0.85461	1.36146
OTU_98	0.726024	1	0.207435	0.658287	1	0.422604	1.20715	1.20715	NonGM_StageI up vs NonGM_StageII	0.303396	1	0.268235	1.55773	1.55773	NonGM_StageI up vs NonGM_StageIII	0.554011	1	0.310877	1.28713	1.28713	NonGM_StageI up vs NonGM_StageIV	0.876713	1	0.496035	0.93624	-1.0681	NonGM_StageI down vs NonGM_StageV	0.526366	1	0.785234	1.29042	1.29042	NonGM_StageII up vs NonGM_StageIII	0.872705	1	0.745786	1.06626	1.06626	NonGM_StageII up vs NonGM_StageIV	0.527685	1	0.667683	0.775579	-1.28936	NonGM_StageII down vs NonGM_StageV	0.634594	1	0.884542	0.826287
OTU_12	0.746775	1	0.211988	0.253778	1	0.265488	0.664742	-1.50434	NonGM_StageI down vs NonGM_StageII	0.926561	1	0.470271	0.96811	-1.03294	NonGM_StageI down vs NonGM_StageIII	0.54808	1	0.310877	0.808803	-1.23639	NonGM_StageI down vs NonGM_StageIV	0.756572	1	0.458205	0.896619	-1.1153	NonGM_StageI down vs NonGM_StageV	0.264736	1	0.69092	1.45637	1.45637	NonGM_StageII up vs NonGM_StageIII	0.555847	1	0.635478	1.21672	1.21672	NonGM_StageII up vs NonGM_StageIV	0.371815	1	0.581157	1.34882	1.34882	NonGM_StageII up vs NonGM_StageV	0.589007	1	0.884542	0.835446
OTU_37	0.799444	1	0.225484	0.516873	1	0.358365	1.26468	1.26468	NonGM_StageI up vs NonGM_StageII	0.502173	1	0.341238	1.27535	1.27535	NonGM_StageI up vs NonGM_StageIII	0.829482	1	0.403217	1.08072	1.08072	NonGM_StageI up vs NonGM_StageIV	0.268871	1	0.272034	1.49922	1.49922	NonGM_StageI up vs NonGM_StageV	0.980278	1	0.886403	1.00843	1.00843	NonGM_StageII up vs NonGM_StageIII	0.644442	1	0.670038	0.854541	-1.17022	NonGM_StageII down vs NonGM_StageIV	0.617632	1	0.710437	1.18545	1.18545	NonGM_StageII up vs NonGM_StageV	0.626971	1	0.884542	0.847396
OTU_125	0.812408	1	0.227681	0.812544	1	0.466361	0.898992	-1.11236	NonGM_StageI down vs NonGM_StageII	0.540329	1	0.349508	1.31801	1.31801	NonGM_StageI up vs NonGM_StageIII	0.467589	1	0.285115	1.38853	1.38853	NonGM_StageI up vs NonGM_StageIV	0.924912	1	0.505655	1.0432	1.0432	NonGM_StageI up vs NonGM_StageV	0.370922	1	0.709771	1.46609	1.46609	NonGM_StageII up vs NonGM_StageIII	0.310807	1	0.497236	1.54454	1.54454	NonGM_StageII up vs NonGM_StageIV	0.725502	1	0.758187	1.16041	1.16041	NonGM_StageII up vs NonGM_StageV	0.901949	1	0.920826	1.05351
OTU_120	0.822609	1	0.229081	0.447368	1	0.349297	1.29151	1.29151	NonGM_StageI up vs NonGM_StageII	0.483606	1	0.338215	1.26564	1.26564	NonGM_StageI up vs NonGM_StageIII	0.529543	1	0.307874	1.2351	1.2351	NonGM_StageI up vs NonGM_StageIV	0.924638	1	0.505655	0.968889	-1.03211	NonGM_StageI down vs NonGM_StageV	0.948767	1	0.886403	0.979964	-1.02045	NonGM_StageII down vs NonGM_StageIII	0.887272	1	0.745786	0.956322	-1.04567	NonGM_StageII down vs NonGM_StageIV	0.366758	1	0.580077	0.750196	-1.33298	NonGM_StageII down vs NonGM_StageV	0.938202	1	0.920826	0.975875
OTU_29	0.833952	1	0.230779	0.257319	1	0.265488	1.31803	1.31803	NonGM_StageI up vs NonGM_StageII	0.497905	1	0.341157	1.1775	1.1775	NonGM_StageI up vs NonGM_StageIII	0.462358	1	0.284236	1.19408	1.19408	NonGM_StageI up vs NonGM_StageIV	0.394293	1	0.311094	1.22887	1.22887	NonGM_StageI up vs NonGM_StageV	0.618861	1	0.830175	0.89338	-1.11934	NonGM_StageII down vs NonGM_StageIII	0.662746	1	0.676954	0.905955	-1.10381	NonGM_StageII down vs NonGM_StageIV	0.756809	1	0.759438	0.932357	-1.07255	NonGM_StageII down vs NonGM_StageV	0.950659	1	0.920826	1.01408
OTU_164	0.872155	1	0.239843	0.848664	1	0.477603	1.08344	1.08344	NonGM_StageI up vs NonGM_StageII	0.489307	1	0.338215	0.74669	-1.33924	NonGM_StageI down vs NonGM_StageIII	0.670389	1	0.357336	0.836028	-1.19613	NonGM_StageI down vs NonGM_StageIV	0.619333	1	0.397482	0.811208	-1.23273	NonGM_StageI down vs NonGM_StageV	0.352537	1	0.709771	0.689186	-1.45099	NonGM_StageII down vs NonGM_StageIII	0.514853	1	0.635234	0.771643	-1.29594	NonGM_StageII down vs NonGM_StageIV	0.467834	1	0.647449	0.748735	-1.33559	NonGM_StageII down vs NonGM_StageV	0.775457	1	0.896232	1.11964
OTU_38	0.881861	1	0.241005	0.498427	1	0.357	0.87707	-1.14016	NonGM_StageI down vs NonGM_StageII	0.632282	1	0.387967	0.911712	-1.09684	NonGM_StageI down vs NonGM_StageIII	0.713147	1	0.371431	0.931534	-1.0735	NonGM_StageI down vs NonGM_StageIV	0.322531	1	0.283038	0.824454	-1.21292	NonGM_StageI down vs NonGM_StageV	0.831142	1	0.886403	1.0395	1.0395	NonGM_StageII up vs NonGM_StageIII	0.740382	1	0.709716	1.0621	1.0621	NonGM_StageII up vs NonGM_StageIV	0.733684	1	0.758187	0.940009	-1.06382	NonGM_StageII down vs NonGM_StageV	0.905714	1	0.920826	1.02174
OTU_140	0.929886	1	0.252562	0.514268	1	0.358365	1.44001	1.44001	NonGM_StageI up vs NonGM_StageII	0.864338	1	0.455563	1.09968	1.09968	NonGM_StageI up vs NonGM_StageIII	0.683794	1	0.361159	1.25473	1.25473	NonGM_StageI up vs NonGM_StageIV	0.925975	1	0.505655	0.949656	-1.05301	NonGM_StageI down vs NonGM_StageV	0.608205	1	0.828639	0.763659	-1.30949	NonGM_StageII down vs NonGM_StageIII	0.792906	1	0.724821	0.871335	-1.14766	NonGM_StageII down vs NonGM_StageIV	0.430881	1	0.623158	0.659478	-1.51635	NonGM_StageII down vs NonGM_StageV	0.80146	1	0.896232	1.141
OTU_114	0.938546	1	0.25335	0.635575	1	0.417296	1.18564	1.18564	NonGM_StageI up vs NonGM_StageII	0.518319	1	0.346998	1.26201	1.26201	NonGM_StageI up vs NonGM_StageIII	0.810835	1	0.398026	1.0896	1.0896	NonGM_StageI up vs NonGM_StageIV	0.457089	1	0.341823	1.30787	1.30787	NonGM_StageI up vs NonGM_StageV	0.853437	1	0.886403	1.06441	1.06441	NonGM_StageII up vs NonGM_StageIII	0.802672	1	0.724821	0.918997	-1.08814	NonGM_StageII down vs NonGM_StageIV	0.771687	1	0.759438	1.10309	1.10309	NonGM_StageII up vs NonGM_StageV	0.664419	1	0.884542	0.863383
OTU_73	0.987074	1	0.263804	0.98418	1	0.522088	1.00821	1.00821	NonGM_StageI up vs NonGM_StageII	0.835153	1	0.451764	0.917679	-1.08971	NonGM_StageI down vs NonGM_StageIII	0.75742	1	0.383828	0.880206	-1.1361	NonGM_StageI down vs NonGM_StageIV	0.872836	1	0.496035	1.06829	1.06829	NonGM_StageI up vs NonGM_StageV	0.80902	1	0.886403	0.910202	-1.09866	NonGM_StageII down vs NonGM_StageIII	0.727473	1	0.709716	0.873035	-1.14543	NonGM_StageII down vs NonGM_StageIV	0.881751	1	0.796918	1.05959	1.05959	NonGM_StageII up vs NonGM_StageV	0.91466	1	0.920826	0.959166
OTU_2102	0.994307	1	0.263804	0.981777	1	0.522088	0.988736	-1.01139	NonGM_StageI down vs NonGM_StageII	0.880692	1	0.459141	0.928246	-1.0773	NonGM_StageI down vs NonGM_StageIII	0.920552	1	0.439754	1.05071	1.05071	NonGM_StageI up vs NonGM_StageIV	0.797971	1	0.475793	1.13548	1.13548	NonGM_StageI up vs NonGM_StageV	0.892624	1	0.886403	0.938821	-1.06517	NonGM_StageII down vs NonGM_StageIII	0.896567	1	0.745786	1.06268	1.06268	NonGM_StageII up vs NonGM_StageIV	0.76752	1	0.759438	1.14842	1.14842	NonGM_StageII up vs NonGM_StageV	0.791166	1	0.896232	1.13194
OTU_41	0.995259	1	0.263804	0.691218	1	0.434098	0.781552	-1.27951	NonGM_StageI down vs NonGM_StageII	0.73856	1	0.415529	0.813038	-1.22995	NonGM_StageI down vs NonGM_StageIII	0.809297	1	0.398026	0.861093	-1.16131	NonGM_StageI down vs NonGM_StageIV	0.855875	1	0.493995	0.893584	-1.11909	NonGM_StageI down vs NonGM_StageV	0.946064	1	0.886403	1.04029	1.04029	NonGM_StageII up vs NonGM_StageIII	0.86819	1	0.745786	1.10177	1.10177	NonGM_StageII up vs NonGM_StageIV	0.818635	1	0.765506	1.14335	1.14335	NonGM_StageII up vs NonGM_StageV	0.921653	1	0.920826	1.05911
OTU_592							1	1	No change between NonGM_StageI and NonGM_StageII				1	1	No change between NonGM_StageI and NonGM_StageIII				1	1	No change between NonGM_StageI and NonGM_StageIV				1	1	No change between NonGM_StageI and NonGM_StageV				1	1	No change between NonGM_StageII and NonGM_StageIII				1	1	No change between NonGM_StageII and NonGM_StageIV				1	1	No change between NonGM_StageII and NonGM_StageV				1
OTU_826							1	1	No change between NonGM_StageI and NonGM_StageII				1	1	No change between NonGM_StageI and NonGM_StageIII				1	1	No change between NonGM_StageI and NonGM_StageIV				1	1	No change between NonGM_StageI and NonGM_StageV				1	1	No change between NonGM_StageII and NonGM_StageIII				1	1	No change between NonGM_StageII and NonGM_StageIV				1	1	No change between NonGM_StageII and NonGM_StageV				1
[truncated: 18 more columns]
