# Supplementary material for: Bt-modified transgenic rice shifted the composition and diversity of rhizosphere microbiota
Source: Preprints.org preprint supplement (doi:10.20944/preprints202402.1379.v1), 2024-02-23
Supplement: Supplementary file 12 [file Table S9.xlsx]

## Sheet: S9
Table S9 Statistical test of CK ACM OTUs from different rice developmental stages.
OTU ID	p-value(Treatment)	bonferroni(p-value(Treatment))	qvalue(p-value(Treatment))	Obs(CK_StageI)	Mean(CK_StageI)	LSMean(CK_StageI)	Std(CK_StageI)	StdErr(CK_StageI)	Min(CK_StageI)	Max(CK_StageI)	Obs(CK_StageII)	Mean(CK_StageII)	LSMean(CK_StageII)	Std(CK_StageII)	StdErr(CK_StageII)	Min(CK_StageII)	Max(CK_StageII)	Obs(CK_StageIII)	Mean(CK_StageIII)	LSMean(CK_StageIII)	Std(CK_StageIII)	StdErr(CK_StageIII)	Min(CK_StageIII)	Max(CK_StageIII)	Obs(CK_StageIV)	Mean(CK_StageIV)	LSMean(CK_StageIV)	Std(CK_StageIV)	StdErr(CK_StageIV)	Min(CK_StageIV)	Max(CK_StageIV)	Obs(CK_StageV)	Mean(CK_StageV)	LSMean(CK_StageV)	Std(CK_StageV)	StdErr(CK_StageV)	Min(CK_StageV)	Max(CK_StageV)	p-value(CK_StageI vs. CK_StageII)	bonferroni(p-value(CK_StageI vs. CK_StageII))	qvalue(p-value(CK_StageI vs. CK_StageII))	Ratio(CK_StageI vs. CK_StageII)	Fold-Change(CK_StageI vs. CK_StageII)	Fold-Change(CK_StageI vs. CK_StageII) (Description)	p-value(CK_StageI vs. CK_StageIII)	bonferroni(p-value(CK_StageI vs. CK_StageIII))	qvalue(p-value(CK_StageI vs. CK_StageIII))	Ratio(CK_StageI vs. CK_StageIII)	Fold-Change(CK_StageI vs. CK_StageIII)
OTU_368	0.00104139	0.174954	0.0362777	4	1.68392	1.68392	1.22537	0.612686	1.01539	3.52071	4	1.94046	1.94046	0.376474	0.188237	1.63988	2.43308	5	2.50993	2.50993	0.696692	0.31157	1.66091	3.4766	4	2.83878	2.83878	0.51674	0.25837	2.10811	3.32616	5	0.432359	0.432359	0.592372	0.264917	0	1.1093	0.625871	1	0.588758	0.83709	-1.19461	CK_StageI down vs CK_StageII	0.110212	1	0.277902	0.564086	-1.77278
OTU_22	0.00155796	0.261737	0.0362777	4	1.20457	1.20457	0.886287	0.443143	0	2.02303	4	1.42955	1.42955	1.01208	0.506041	0	2.38758	5	3.38317	3.38317	0.584092	0.261214	2.67666	4.2171	4	2.73858	2.73858	0.445344	0.222672	2.1304	3.15392	5	2.57193	2.57193	0.623352	0.278772	1.73949	3.26197	0.666432	1	0.589124	0.855608	-1.16876	CK_StageI down vs CK_StageII	0.000331253	0.0556504	0.030668	0.22089	-4.52714
OTU_68	0.00202579	0.340332	0.0362777	4	3.69698	3.69698	0.35388	0.17694	3.29719	4.11254	4	2.64175	2.64175	0.301475	0.150738	2.36079	2.92612	5	2.59502	2.59502	0.221193	0.0989205	2.33705	2.90159	4	2.51484	2.51484	0.585005	0.292503	1.70369	2.95545	5	3.08508	3.08508	0.418227	0.187037	2.40503	3.3725	0.00131813	0.221445	0.0575437	2.07804	2.07804	CK_StageI up vs CK_StageII	0.000570567	0.0958553	0.030668	2.14646	2.14646
OTU_15	0.00263838	0.443247	0.0362777	4	3.94084	3.94084	0.546268	0.273134	3.21475	4.42149	4	3.2759	3.2759	0.632316	0.316158	2.38758	3.74519	5	2.78663	2.78663	0.459373	0.205438	2.36199	3.29006	4	3.22406	3.22406	0.741504	0.370752	2.46996	3.86235	5	4.3706	4.3706	0.362691	0.1622	3.85781	4.74044	0.10462	1	0.32283	1.5855	1.5855	CK_StageI up vs CK_StageII	0.00600956	1	0.103346	2.22562	2.22562
OTU_163	0.00718199	1	0.0534448	4	2.05211	2.05211	0.799165	0.399583	1.07297	2.79018	4	4.22156	4.22156	1.27886	0.639431	2.89353	5.91311	5	2.28892	2.28892	0.792481	0.354408	1.05572	3.01653	4	3.34997	3.34997	0.684443	0.342221	2.7046	4.25238	5	2.42098	2.42098	0.401699	0.179645	1.72893	2.72777	0.00159844	0.268537	0.0575437	0.222296	-4.4985	CK_StageI down vs CK_StageII	0.671622	1	0.564058	0.848619	-1.17839
OTU_604	0.00761762	1	0.0534448	4	3.07574	3.07574	0.442507	0.221253	2.76992	3.71603	4	2.3781	2.3781	0.72928	0.36464	1.63988	3.36557	5	2.62697	2.62697	0.321185	0.143638	2.08517	2.90159	4	2.59208	2.59208	0.165768	0.0828841	2.43696	2.73885	5	3.43756	3.43756	0.202072	0.0903695	3.19961	3.67979	0.0273818	1	0.169742	1.62185	1.62185	CK_StageI up vs CK_StageII	0.120144	1	0.277902	1.36488	1.36488
OTU_46	0.0082381	1	0.0534448	4	2.62716	2.62716	0.644664	0.322332	2.02303	3.38784	4	1.83282	1.83282	0.352341	0.17617	1.63988	2.36079	5	2.72847	2.72847	0.470388	0.210364	2.36199	3.42072	4	2.74681	2.74681	0.425824	0.212912	2.10811	2.9654	5	3.2598	3.2598	0.484346	0.216606	2.50547	3.79591	0.0330548	1	0.169996	1.73428	1.73428	CK_StageI up vs CK_StageII	0.758937	1	0.581921	0.932187	-1.07275
OTU_12	0.00869781	1	0.0534448	4	2.9731	2.9731	0.334751	0.167375	2.61052	3.29719	4	3.52469	3.52469	0.579167	0.289583	2.89353	4.21737	5	3.46519	3.46519	0.502639	0.224787	2.85024	4.01213	4	2.79675	2.79675	0.415482	0.207741	2.46061	3.32616	5	2.1939	2.1939	0.715051	0.319781	1.11742	3.09065	0.165091	1	0.363875	0.682265	-1.46571	CK_StageI down vs CK_StageII	0.19032	1	0.34677	0.710994	-1.40648
OTU_2	0.00948824	1	0.0534448	4	5.63971	5.63971	0.388727	0.194364	5.25749	6.17994	4	5.24549	5.24549	0.13964	0.06982	5.07913	5.41968	5	5.2902	5.2902	0.25935	0.115985	5.01273	5.63321	4	5.15626	5.15626	0.404107	0.202054	4.5669	5.45262	5	5.93601	5.93601	0.349512	0.156307	5.33456	6.25149	0.101202	1	0.32283	1.31423	1.31423	CK_StageI up vs CK_StageII	0.123735	1	0.277902	1.27412	1.27412
OTU_6	0.00986086	1	0.0534448	4	2.14836	2.14836	1.51738	0.758692	0	3.54237	4	3.45414	3.45414	0.468084	0.234042	2.89353	3.85236	5	3.92407	3.92407	0.571143	0.255423	3.33893	4.63132	4	4.111	4.111	0.0670038	0.0335019	4.04024	4.17202	5	4.01343	4.01343	0.505399	0.226022	3.26197	4.49767	0.0270489	1	0.169742	0.404504	-2.47216	CK_StageI down vs CK_StageII	0.00294158	0.494185	0.0874678	0.292051	-3.42407
OTU_30	0.0126116	1	0.0534448	4	3.0123	3.0123	0.607147	0.303574	2.34648	3.78718	4	0.656354	0.656354	1.31271	0.656354	0	2.62542	5	1.27678	1.27678	0.807658	0.361196	0	2.08517	4	1.64897	1.64897	0.773718	0.386859	1.08823	2.73191	5	1.82164	1.82164	0.523308	0.23403	1.1093	2.47131	0.00092085	0.154703	0.0575437	5.1193	5.1193	CK_StageI up vs CK_StageII	0.00638744	1	0.103346	3.32999	3.32999
OTU_5	0.0133719	1	0.0534448	4	5.01779	5.01779	0.776619	0.388309	4.37785	5.98433	4	4.96278	4.96278	0.383065	0.191533	4.39957	5.22657	5	5.00711	5.00711	0.215485	0.096368	4.80297	5.27939	4	5.23766	5.23766	0.370216	0.185108	4.69886	5.52816	5	5.93719	5.93719	0.268832	0.120225	5.57261	6.31125	0.858392	1	0.618661	1.03887	1.03887	CK_StageI up vs CK_StageII	0.970854	1	0.656395	1.00743	1.00743
OTU_303	0.013442	1	0.0534448	4	2.96826	2.96826	0.952936	0.476468	1.60545	3.66009	4	2.04628	2.04628	0.318674	0.159337	1.61742	2.38758	5	2.58732	2.58732	0.298175	0.133348	2.33705	2.92337	4	1.65235	1.65235	0.421045	0.210522	1.08823	2.10811	5	1.2432	1.2432	1.0718	0.479324	0	2.96683	0.0828804	1	0.30794	1.89471	1.89471	CK_StageI up vs CK_StageII	0.433313	1	0.50578	1.30219	1.30219
OTU_170	0.0156327	1	0.0534448	4	2.66664	2.66664	0.679756	0.339878	1.68145	3.19717	4	3.51679	3.51679	0.332117	0.166058	3.21304	3.88329	5	3.62678	3.62678	0.365454	0.163436	3.04376	4.01771	4	4.03732	4.03732	0.324076	0.162038	3.71603	4.4883	5	3.23965	3.23965	0.656795	0.293728	2.47131	3.90337	0.0285392	1	0.169742	0.55473	-1.80268	CK_StageI down vs CK_StageII	0.0111084	1	0.147676	0.51401	-1.94549
OTU_4	0.0159807	1	0.0534448	4	5.30092	5.30092	0.649112	0.324556	4.45755	5.98433	4	5.34413	5.34413	0.0961459	0.0480729	5.20863	5.41956	5	4.82768	4.82768	0.222542	0.0995239	4.58806	5.13592	4	4.63035	4.63035	0.271739	0.135869	4.34314	4.99571	5	4.6276	4.6276	0.334537	0.149609	4.26167	5.17344	0.865854	1	0.618661	0.970488	-1.03041	CK_StageI down vs CK_StageII	0.0641802	1	0.255532	1.38823	1.38823
OTU_50	0.0168947	1	0.0534448	4	3.47283	3.47283	0.6152	0.3076	2.61052	3.92611	4	2.27354	2.27354	0.403659	0.201829	2.03646	2.87759	5	3.19989	3.19989	0.647519	0.289579	2.33705	4.01213	4	2.78094	2.78094	0.486891	0.243446	2.13921	3.29719	5	1.78821	1.78821	1.1047	0.494037	0	2.98995	0.0314336	1	0.169742	2.29626	2.29626	CK_StageI up vs CK_StageII	0.581105	1	0.529397	1.20827	1.20827
OTU_423	0.0170217	1	0.0534448	4	0.839213	0.839213	0.97087	0.485435	0	1.75141	4	2.46728	2.46728	0.970219	0.485109	1.05089	3.12114	5	2.67103	2.67103	1.01329	0.453156	1.59758	3.82501	4	2.70527	2.70527	0.294851	0.147425	2.43696	2.9654	5	2.58058	2.58058	0.450145	0.201311	2.12914	3.18616	0.0102915	1	0.123498	0.323522	-3.09098	CK_StageI down vs CK_StageII	0.00325462	0.546775	0.0874678	0.280911	-3.55985
OTU_281	0.017491	1	0.0534448	4	1.44068	1.44068	1.00673	0.503363	0	2.34648	4	0.523069	0.523069	0.604001	0.302	0	1.05089	5	2.20947	2.20947	0.905849	0.405108	1.05572	3.18672	4	0.956549	0.956549	1.2911	0.645552	0	2.73191	5	2.52654	2.52654	0.436892	0.195384	2.12914	3.18616	0.158834	1	0.362523	1.88898	1.88898	CK_StageI up vs CK_StageII	0.210449	1	0.370873	0.586908	-1.70384
OTU_62	0.0243183	1	0.0590482	4	2.19148	2.19148	0.822742	0.411371	1.1266	3.12536	4	0.518825	0.518825	0.599186	0.299593	0	1.05089	5	1.40018	1.40018	0.308554	0.13799	1.05733	1.65878	4	0.955167	0.955167	1.11865	0.559326	0	2.13921	5	1.66839	1.66839	0.355722	0.159084	1.09516	2.07804	0.00272214	0.45732	0.0587982	3.18801	3.18801	CK_StageI up vs CK_StageII	0.0986439	1	0.277902	1.73063	1.73063
OTU_177	0.0246599	1	0.0590482	4	1.13979	1.13979	0.822937	0.411468	0	1.75141	4	3.40111	3.40111	0.74948	0.37474	2.40252	4.13307	5	1.72806	1.72806	0.604347	0.270272	1.02517	2.69788	4	2.50779	2.50779	0.612667	0.306334	1.70144	3.15392	5	2.04092	2.04092	1.35364	0.605368	0	3.61454	0.00235188	0.395116	0.0587982	0.208581	-4.7943	CK_StageI down vs CK_StageII	0.341182	1	0.486878	0.665138	-1.50345
OTU_125	0.026281	1	0.0590482	4	2.08681	2.08681	0.671682	0.335841	1.1138	2.61052	4	1.45124	1.45124	0.493462	0.246731	1.04138	2.07568	5	1.60081	1.60081	0.628862	0.281236	1.05733	2.60071	4	2.82993	2.82993	0.521958	0.260979	2.13921	3.32323	5	1.29201	1.29201	0.896251	0.400815	0	2.16099	0.199199	1	0.365373	1.55356	1.55356	CK_StageI up vs CK_StageII	0.296635	1	0.462148	1.40056	1.40056
OTU_619	0.0265839	1	0.0590482	4	2.56067	2.56067	0.396295	0.198147	2.02303	2.93027	4	1.45354	1.45354	0.510729	0.255365	1.04138	2.10445	5	1.67497	1.67497	0.496653	0.22211	1.00947	2.41007	4	1.12094	1.12094	0.804575	0.402287	0	1.70936	5	1.87148	1.87148	0.574704	0.257015	1.11742	2.67142	0.0136157	1	0.147049	2.15418	2.15418	CK_StageI up vs CK_StageII	0.033005	1	0.209908	1.84766	1.84766
OTU_225	0.0279592	1	0.0590482	4	0.549891	0.549891	0.635336	0.317668	0	1.1266	4	1.90107	1.90107	0.512442	0.256221	1.61742	2.66881	5	1.75335	1.75335	0.479809	0.214577	1.05733	2.33705	4	1.49971	1.49971	0.509646	0.254823	1.08823	2.13921	5	0.862519	0.862519	0.907082	0.405659	0	2.17273	0.00840573	1	0.123498	0.391971	-2.55121	CK_StageI down vs CK_StageII	0.0123636	1	0.147676	0.434233	-2.30291
OTU_150	0.028768	1	0.0590482	4	3.18671	3.18671	0.544359	0.27218	2.43696	3.72873	4	1.53154	1.53154	1.07422	0.53711	0	2.43308	5	2.01143	2.01143	0.687079	0.307271	1.05733	2.69788	4	2.55018	2.55018	0.668578	0.334289	1.70936	3.32616	5	1.69943	1.69943	0.626324	0.2801	1.08737	2.50547	0.00535333	0.89936	0.09636	3.1496	3.1496	CK_StageI up vs CK_StageII	0.0288058	1	0.209908	2.25838	2.25838
OTU_149	0.0288227	1	0.0590482	4	1.29271	1.29271	1.00668	0.50334	0	2.34648	4	1.64697	1.64697	0.0253438	0.0126719	1.61742	1.67817	5	2.0577	2.0577	0.756564	0.338346	1.05572	2.92337	4	2.75455	2.75455	0.755385	0.377692	2.10811	3.61604	5	2.66547	2.66547	0.526786	0.235586	2.07804	3.18616	0.479257	1	0.533605	0.782269	-1.27833	CK_StageI down vs CK_StageII	0.11799	1	0.277902	0.588458	-1.69936
OTU_20	0.0296242	1	0.0590482	4	0.979726	0.979726	1.14397	0.571986	0	2.1675	4	1.3468	1.3468	0.346219	0.173109	1.02441	1.65243	5	2.15912	2.15912	1.10909	0.496002	1.05572	4.01213	4	3.22262	3.22262	0.729977	0.364989	2.43696	4.17202	5	1.65162	1.65162	1.01302	0.453038	0	2.74024	0.586581	1	0.570727	0.775355	-1.28973	CK_StageI down vs CK_StageII	0.0777375	1	0.277902	0.441536	-2.26482
OTU_257	0.0299	1	0.0590482	4	3.16759	3.16759	0.439164	0.219582	2.51947	3.48729	4	1.85286	1.85286	0.659292	0.329646	1.07046	2.62542	5	2.05955	2.05955	0.751596	0.336124	1.00947	2.85024	4	1.11834	1.11834	0.79819	0.399095	0	1.70369	5	1.89957	1.89957	1.07091	0.478925	0	2.49304	0.031103	1	0.169742	2.48756	2.48756	CK_StageI up vs CK_StageII	0.0521783	1	0.233716	2.15552	2.15552
OTU_2435	0.0300609	1	0.0590482	4	0	0	0	0	0	0	4	0.523719	0.523719	0.60503	0.302515	0	1.07046	5	0	0	0	0	0	0	4	0	0	0	0	0	0	5	0	0	0	0	0	0	0.00966981	1	0.123498	0.695577	-1.43766	CK_StageI down vs CK_StageII	1	1	0.659509	1	1
OTU_2351	0.0325263	1	0.0614234	4	0	2.22045e-16	0	0	0	0	4	0.919764	0.919764	1.07742	0.538712	0	2.06164	5	0.406928	0.406928	0.557236	0.249204	0	1.02517	4	1.49971	1.49971	0.509646	0.254823	1.08823	2.13921	5	1.59619	1.59619	1.10847	0.495723	0	2.74024	0.114933	1	0.326286	0.528595	-1.89181	CK_StageI down vs CK_StageII	0.449059	1	0.50578	0.754228	-1.32586
OTU_9	0.0344506	1	0.0614234	4	3.88904	3.88904	0.311301	0.155651	3.52071	4.27695	4	4.64415	4.64415	0.324669	0.162335	4.32536	5.00107	5	4.62018	4.62018	0.46282	0.206979	4.19356	5.37902	4	3.98046	3.98046	0.189958	0.0949792	3.83239	4.25238	5	4.08066	4.08066	0.572274	0.255929	3.35885	4.76216	0.0189292	1	0.157258	0.592502	-1.68776	CK_StageI down vs CK_StageII	0.0169424	1	0.165573	0.602428	-1.65995
OTU_75	0.0346204	1	0.0614234	4	2.38647	2.38647	0.550874	0.275437	1.68145	3.01803	4	2.14238	2.14238	0.58734	0.29367	1.63988	2.84895	5	3.04025	3.04025	0.515602	0.230584	2.41007	3.82501	4	3.37046	3.37046	0.508476	0.254238	2.93027	3.96714	5	2.9716	2.9716	0.615173	0.275114	2.17273	3.61454	0.544543	1	0.555604	1.18435	1.18435	CK_StageI up vs CK_StageII	0.0988917	1	0.277902	0.635611	-1.57329
OTU_23	0.043666	1	0.075051	4	2.43939	2.43939	0.881823	0.440912	1.73478	3.72873	4	2.61987	2.61987	1.20097	0.600483	1.05089	3.82795	5	3.19959	3.19959	0.561031	0.250901	2.36199	3.7087	4	2.96229	2.96229	0.59998	0.29999	2.43696	3.61902	5	3.98441	3.98441	0.221525	0.0990692	3.7413	4.28677	0.732823	1	0.592788	0.882414	-1.13326	CK_StageI down vs CK_StageII	0.141753	1	0.290416	0.590414	-1.69373
OTU_10	0.0470325	1	0.0783874	4	3.13857	3.13857	0.602017	0.301008	2.51947	3.90398	4	3.96186	3.96186	0.537941	0.26897	3.50351	4.74004	5	4.40748	4.40748	0.474569	0.212234	3.80457	4.90619	4	3.32827	3.32827	0.533183	0.266591	2.7046	3.96714	5	3.77974	3.77974	0.819413	0.366453	2.45928	4.66138	0.074762	1	0.299048	0.565153	-1.76943	CK_StageI down vs CK_StageII	0.00672947	1	0.103346	0.414974	-2.40979
OTU_92	0.0535233	1	0.0859412	4	2.32859	2.32859	0.450724	0.225362	2.02303	2.99727	4	1.95868	1.95868	0.85084	0.42542	1.07046	3.08792	5	1.85893	1.85893	0.450402	0.201426	1.05572	2.10201	4	1.22881	1.22881	0.927825	0.463913	0	2.13291	5	2.65891	2.65891	0.560567	0.250693	1.72893	3.19961	0.439738	1	0.507992	1.29227	1.29227	CK_StageI up vs CK_StageII	0.304476	1	0.463783	1.38478	1.38478
OTU_36	0.0547466	1	0.0859412	4	4.82522	4.82522	0.332569	0.166284	4.45755	5.23925	4	3.78885	3.78885	0.499656	0.249828	3.04245	4.094	5	4.2241	4.2241	0.574686	0.257007	3.42354	4.749	4	4.0667	4.0667	0.550139	0.27507	3.29719	4.55597	5	3.69608	3.69608	0.651011	0.291141	3.16262	4.78766	0.0151387	1	0.148634	2.05105	2.05105	CK_StageI up vs CK_StageII	0.116992	1	0.277902	1.51689	1.51689
OTU_96	0.0562524	1	0.0859412	4	0.89089	0.89089	1.15949	0.579747	0	2.43696	4	1.53526	1.53526	0.643548	0.321774	1.02441	2.38758	5	2.16062	2.16062	0.814389	0.364206	1.05733	3.09613	4	2.58192	2.58192	0.593745	0.296872	1.70936	2.95829	5	2.50698	2.50698	0.96702	0.432465	1.0525	3.75489	0.306981	1	0.438368	0.63977	-1.56306	CK_StageI down vs CK_StageII	0.042958	1	0.209908	0.414738	-2.41116
OTU_72	0.06503	1	0.0961881	4	2.00878	2.00878	0.688392	0.344196	1.1138	2.79018	4	1.08662	1.08662	0.777538	0.388769	0	1.67817	5	2.99109	2.99109	0.409808	0.183272	2.43049	3.56204	4	2.16439	2.16439	0.902404	0.451202	1.08823	3.29719	5	2.1725	2.1725	1.26513	0.565782	0	3.00316	0.150488	1	0.362523	1.89495	1.89495	CK_StageI up vs CK_StageII	0.109141	1	0.277902	0.506169	-1.97562
OTU_158	0.0664573	1	0.0961881	4	2.01136	2.01136	1.65014	0.82507	0	3.94005	4	0.523719	0.523719	0.60503	0.302515	0	1.07046	5	0.413361	0.413361	0.56627	0.253244	0	1.05733	4	0.69798	0.69798	0.844216	0.422108	0	1.70369	5	0.210499	0.210499	0.47069	0.210499	0	1.0525	0.0308351	1	0.169742	2.8043	2.8043	CK_StageI up vs CK_StageII	0.0162937	1	0.165573	3.02723	3.02723
OTU_197	0.0694628	1	0.0979604	4	1.4832	1.4832	1.05591	0.527957	0	2.49993	4	0.516448	0.516448	0.596383	0.298192	0	1.04138	5	1.93135	1.93135	0.848031	0.379251	1.02517	3.29006	4	0.967173	0.967173	0.707559	0.35378	0	1.70144	5	0.549939	0.549939	0.778573	0.348189	0	1.65454	0.110598	1	0.32283	1.95443	1.95443	CK_StageI up vs CK_StageII	0.422171	1	0.50578	0.73298	-1.36429
OTU_59	0.0735112	1	0.101078	4	3.09302	3.09302	0.50652	0.25326	2.51947	3.72873	4	2.57013	2.57013	0.356457	0.178228	2.07568	2.92612	5	2.57762	2.57762	0.692106	0.309519	1.61842	3.55918	4	3.6273	3.6273	0.261686	0.130843	3.33351	3.97018	5	2.70099	2.70099	0.76182	0.340696	1.65454	3.3725	0.214618	1	0.367707	1.43683	1.43683	CK_StageI up vs CK_StageII	0.198076	1	0.354886	1.42939	1.42939
OTU_26	0.0800792	1	0.107423	4	1.21873	1.21873	0.931198	0.465599	0	2.10811	4	0.927423	0.927423	0.674398	0.337199	0	1.61742	5	2.5679	2.5679	1.03202	0.461533	1.05572	3.80457	4	2.17153	2.17153	0.927689	0.463844	1.08823	2.95829	5	1.09861	1.09861	1.16972	0.523116	0	2.74024	0.679055	1	0.589124	1.22374	1.22374	CK_StageI up vs CK_StageII	0.0555619	1	0.238916	0.392518	-2.54766
OTU_157	0.0827097	1	0.10831	4	0.82834	0.82834	0.5527	0.27635	0	1.1266	4	1.33287	1.33287	0.911177	0.455589	0	2.06164	5	1.89343	1.89343	0.593129	0.265255	1.05572	2.62667	4	0.971551	0.971551	0.709136	0.354568	0	1.70369	5	0.559094	0.559094	0.794907	0.355493	0	1.70031	0.336589	1	0.448785	0.704889	-1.41866	CK_StageI down vs CK_StageII	0.041884	1	0.209908	0.477943	-2.0923
OTU_1	0.0962073	1	0.122838	4	6.24472	6.24472	0.464139	0.232069	5.82327	6.65987	4	6.54794	6.54794	0.235974	0.117987	6.19749	6.69897	5	6.41812	6.41812	0.313252	0.14009	6.01449	6.72185	4	6.12786	6.12786	0.358866	0.179433	5.63031	6.48439	5	5.94512	5.94512	0.254654	0.113885	5.52709	6.16192	0.211169	1	0.367707	0.810441	-1.2339	CK_StageI down vs CK_StageII	0.444267	1	0.50578	0.886752	-1.12771
OTU_325	0.0982704	1	0.122838	4	1.71674	1.71674	1.27082	0.635411	0	3.01803	4	2.2749	2.2749	0.433223	0.216612	1.65243	2.65329	5	1.48412	1.48412	0.42026	0.187946	1.05572	2.03759	4	1.43041	1.43041	1.2227	0.611352	0	2.93027	5	2.85238	2.85238	0.699675	0.312904	2.12914	3.79591	0.371251	1	0.474726	0.679172	-1.47238	CK_StageI down vs CK_StageII	0.691627	1	0.571922	1.17497	1.17497
OTU_71	0.103968	1	0.12524	4	2.49282	2.49282	1.01027	0.505137	1.1138	3.54237	4	3.41183	3.41183	0.65761	0.328805	2.89353	4.29383	5	2.69709	2.69709	0.37772	0.168921	2.41007	3.33893	4	2.77857	2.77857	0.830973	0.415487	1.70369	3.71603	5	3.69706	3.69706	0.69278	0.309821	2.72777	4.68396	0.090605	1	0.310596	0.528874	-1.89081	CK_StageI down vs CK_StageII	0.6795	1	0.56625	0.867979	-1.1521
OTU_8	0.104746	1	0.12524	4	4.61036	4.61036	0.421845	0.210922	4.13392	5.07022	4	4.05587	4.05587	0.597471	0.298736	3.21304	4.5911	5	4.08122	4.08122	0.415117	0.185646	3.68839	4.54162	4	3.89214	3.89214	0.420095	0.210048	3.32323	4.30479	5	3.66563	3.66563	0.527754	0.236019	3.14959	4.42321	0.121625	1	0.328387	1.46865	1.46865	CK_StageI up vs CK_StageII	0.11959	1	0.277902	1.44307	1.44307
OTU_154	0.11766	1	0.137688	4	0.803738	0.803738	0.537746	0.268873	0	1.1266	4	1.41327	1.41327	1.00061	0.500306	0	2.36079	5	0.416177	0.416177	0.569976	0.254901	0	1.05572	4	1.39343	1.39343	0.360313	0.180156	1.07297	1.70936	5	0.651457	0.651457	0.59514	0.266155	0	1.11742	0.196114	1	0.365373	0.655408	-1.52577	CK_StageI down vs CK_StageII	0.379744	1	0.503982	1.30818	1.30818
OTU_94	0.122734	1	0.138164	4	1.4779	1.4779	1.3486	0.674301	0	3.21475	4	1.18984	1.18984	0.887078	0.443539	0	2.03646	5	1.07609	1.07609	1.1455	0.512282	0	2.67929	4	2.01099	2.01099	1.08071	0.540355	1.08823	3.16116	5	2.75743	2.75743	0.665789	0.29775	1.72893	3.32177	0.699793	1	0.589124	1.221	1.221	CK_StageI up vs CK_StageII	0.571737	1	0.529397	1.32116	1.32116
OTU_32	0.123328	1	0.138164	4	3.50385	3.50385	0.74086	0.37043	2.49993	4.22893	4	2.87875	2.87875	0.159574	0.079787	2.70056	3.08792	5	3.36384	3.36384	0.503869	0.225337	2.62667	3.90917	4	3.67145	3.67145	0.521736	0.260868	2.9654	4.16431	5	3.87395	3.87395	0.578744	0.258822	3.14959	4.62237	0.117825	1	0.326286	1.54231	1.54231	CK_StageI up vs CK_StageII	0.702137	1	0.574006	1.10191	1.10191
OTU_100	0.126654	1	0.138164	4	1.49483	1.49483	1.7841	0.892051	0	3.54237	4	1.23983	1.23983	1.20522	0.602612	0	2.89353	5	2.10088	2.10088	0.795532	0.355773	1.05572	2.92337	4	2.91255	2.91255	0.623956	0.311978	2.10811	3.48001	5	2.89488	2.89488	0.865026	0.386852	1.65454	3.96562	0.747207	1	0.592788	1.19334	1.19334	CK_StageI up vs CK_StageII	0.42316	1	0.50578	0.656993	-1.52209
OTU_37	0.128999	1	0.138164	4	3.22375	3.22375	0.542577	0.271288	2.51947	3.83239	4	2.14238	2.14238	0.58734	0.29367	1.63988	2.84895	5	2.20231	2.20231	1.30358	0.582978	0	3.21437	4	1.53599	1.53599	1.13455	0.567276	0	2.73885	5	1.82092	1.82092	0.518601	0.231925	1.11742	2.47131	0.106117	1	0.32283	2.11604	2.11604	CK_StageI up vs CK_StageII	0.107525	1	0.277902	2.02994	2.02994
OTU_29	0.132855	1	0.138164	4	3.29295	3.29295	0.24746	0.12373	2.93027	3.48729	4	2.50043	2.50043	0.615672	0.307836	1.67817	3.04245	5	2.57364	2.57364	0.333123	0.148977	2.08517	2.90159	4	2.82085	2.82085	0.291875	0.145938	2.46328	3.15103	5	2.66206	2.66206	0.588512	0.263191	1.65454	3.14959	0.0227576	1	0.169742	1.7321	1.7321	CK_StageI up vs CK_StageII	0.028372	1	0.209908	1.6464	1.6464
OTU_591	0.13314	1	0.138164	4	0.549891	0.549891	0.635336	0.317668	0	1.1266	4	0	0	0	0	0	0	5	0	-4.06576e-20	0	0	0	0	4	0.273571	0.273571	0.547143	0.273571	0	1.09429	5	0	1.05439e-16	0	0	0	0	0.0412808	1	0.202651	1.46397	1.46397	CK_StageI up vs CK_StageII	0.0325604	1	0.209908	1.46397	1.46397
OTU_41	0.140832	1	0.142321	4	2.52599	2.52599	1.03315	0.516577	1.1138	3.58947	4	3.6255	3.6255	0.838552	0.419276	2.62542	4.453	5	3.66654	3.66654	0.558298	0.249679	3.01653	4.43988	4	3.3392	3.3392	0.656013	0.328006	2.43696	3.96714	5	2.79587	2.79587	0.667104	0.298338	1.73949	3.41509	0.0544145	1	0.246324	0.466675	-2.14282	CK_StageI down vs CK_StageII	0.037308	1	0.209908	0.453589	-2.20464
OTU_74	0.144251	1	0.142321	4	2.47651	2.47651	0.682924	0.341462	1.73478	3.38784	4	2.97374	2.97374	1.18265	0.591325	1.63988	4.21737	5	2.25522	2.25522	0.770499	0.344578	1.00947	2.90429	4	3.53186	3.53186	0.557501	0.27875	2.95545	4.04024	5	2.78083	2.78083	0.104847	0.0468889	2.67142	2.95404	0.345966	1	0.455663	0.708467	-1.4115	CK_StageI down vs CK_StageII	0.655038	1	0.554461	1.16578	1.16578
OTU_312	0.144909	1	0.142321	4	2.64386	2.64386	0.661817	0.330908	1.75141	3.34951	4	3.05706	3.05706	0.534576	0.267288	2.40252	3.71163	5	2.63467	2.63467	0.532335	0.238067	2.03759	3.27033	4	2.69461	2.69461	0.933543	0.466772	2.1304	4.07819	5	1.84915	1.84915	0.694348	0.310522	1.08737	2.47131	0.401723	1	0.482068	0.750954	-1.33164	CK_StageI down vs CK_StageII	0.984154	1	0.659509	1.00639	1.00639
OTU_98	0.151056	1	0.145536	4	1.39245	1.39245	1.13536	0.567681	0	2.7046	4	0.413107	0.413107	0.826214	0.413107	0	1.65243	5	0.332182	0.332182	0.742782	0.332182	0	1.66091	4	0	0	0	0	0	0	5	0.445344	0.445344	0.60982	0.27272	0	1.11742	0.0829664	1	0.30794	1.97157	1.97157	CK_StageI up vs CK_StageII	0.0507383	1	0.233716	2.08532	2.08532
OTU_444	0.1544	1	0.145536	4	0.281649	0.281649	0.563299	0.281649	0	1.1266	4	0.509115	0.509115	1.01823	0.509115	0	2.03646	5	0	2.77556e-17	0	0	0	0	4	1.11929	1.11929	0.797571	0.398786	0	1.70144	5	0.22186	0.22186	0.496093	0.22186	0	1.1093	0.621469	1	0.588758	0.854134	-1.17078	CK_StageI down vs CK_StageII	0.520347	1	0.529397	1.21558	1.21558
OTU_14	0.156121	1	0.145536	4	2.50166	2.50166	0.630633	0.315316	1.68145	3.21475	4	1.45491	1.45491	0.513659	0.25683	1.02441	2.07568	5	1.92889	1.92889	0.534972	0.239247	1.00947	2.4126	4	2.14456	2.14456	0.515525	0.257763	1.70369	2.7046	5	2.12305	2.12305	0.579018	0.258945	1.11742	2.49304	0.0165175	1	0.148657	2.06587	2.06587	CK_StageI up vs CK_StageII	0.143463	1	0.290416	1.48738	1.48738
OTU_815	0.171154	1	0.156457	4	1.2791	1.2791	1.48706	0.74353	0	2.76992	4	0.527962	0.527962	0.609754	0.304877	0	1.07046	5	0.332182	0.332182	0.742782	0.332182	0	1.66091	4	0	0	0	0	0	0	5	1.20284	1.20284	0.79418	0.355168	0	2.07804	0.231877	1	0.379436	1.68312	1.68312	CK_StageI up vs CK_StageII	0.117804	1	0.277902	1.92775	1.92775
OTU_406	0.173774	1	0.156457	4	0.278449	0.278449	0.556898	0.278449	0	1.1138	4	0.530339	0.530339	0.612435	0.306218	0	1.07046	5	0	2.22045e-16	0	0	0	0	4	0.425923	0.425923	0.851846	0.425923	0	1.70369	5	1.19225	1.19225	1.10198	0.492822	0	2.17273	0.63237	1	0.588758	0.839795	-1.19077	CK_StageI down vs CK_StageII	0.577693	1	0.529397	1.21289	1.21289
OTU_229	0.176886	1	0.156457	4	2.30039	2.30039	1.3933	0.696652	1.1138	3.83581	4	1.04679	1.04679	0.0192134	0.00960668	1.02441	1.07046	5	0.902417	0.902417	1.24048	0.554757	0	2.41007	4	1.49922	1.49922	0.505851	0.252925	1.08823	2.13291	5	1.94294	1.94294	0.669863	0.299572	1.08737	2.74024	0.0722284	1	0.299048	2.38436	2.38436	CK_StageI up vs CK_StageII	0.0377442	1	0.209908	2.63531	2.63531
OTU_60	0.18074	1	0.156457	4	2.68287	2.68287	0.737874	0.368937	1.75141	3.34951	4	1.84381	1.84381	1.35961	0.679804	0	3.07166	5	1.61978	1.61978	0.860254	0.384717	1.00947	2.92337	4	1.22487	1.22487	0.917558	0.458779	0	2.10811	5	2.45377	2.45377	0.699272	0.312724	1.70031	3.18616	0.217901	1	0.367707	1.78889	1.78889	CK_StageI up vs CK_StageII	0.105669	1	0.277902	2.08941	2.08941
OTU_192	0.182059	1	0.156457	4	1.39898	1.39898	1.10528	0.552642	0	2.49993	4	0.666073	0.666073	0.809118	0.404559	0	1.63988	5	1.36736	1.36736	0.471223	0.210737	1.00947	2.08279	4	1.33211	1.33211	1.01203	0.506013	0	2.1304	5	2.03027	2.03027	0.32481	0.145259	1.70031	2.49304	0.194523	1	0.365373	1.66198	1.66198	CK_StageI up vs CK_StageII	0.951745	1	0.65182	1.02216	1.02216
OTU_269	0.185351	1	0.156836	4	3.26382	3.26382	1.53307	0.766534	1.1266	4.72989	4	4.09119	4.09119	0.645798	0.322899	3.2427	4.63139	5	4.09177	4.09177	0.530326	0.237169	3.18672	4.58806	4	2.96681	2.96681	0.82357	0.411785	2.1304	3.94005	5	3.16451	3.16451	0.450871	0.201636	2.72777	3.79591	0.186382	1	0.365373	0.563557	-1.77444	CK_StageI down vs CK_StageII	0.164574	1	0.310381	0.563329	-1.77516
OTU_93	0.188936	1	0.157447	4	3.71622	3.71622	0.807387	0.403693	2.51947	4.2065	4	4.01631	4.01631	0.0780166	0.0390083	3.95213	4.12942	5	3.83458	3.83458	0.576567	0.257849	2.90429	4.4103	4	3.26184	3.26184	0.249854	0.124927	2.95545	3.48001	5	3.34363	3.34363	0.47215	0.211152	2.67142	3.91026	0.414841	1	0.486987	0.812204	-1.23122	CK_StageI down vs CK_StageII	0.732487	1	0.574762	0.921237	-1.0855
OTU_246	0.196979	1	0.161699	4	1.90857	1.90857	0.732347	0.366173	1.07297	2.76992	4	0.929555	0.929555	0.685109	0.342554	0	1.65243	5	1.87411	1.87411	1.20497	0.53888	0	3.27033	4	2.27451	2.27451	0.601158	0.300579	1.70936	3.12536	5	1.58416	1.58416	0.279644	0.125061	1.08737	1.73949	0.0920286	1	0.310596	1.97112	1.97112	CK_StageI up vs CK_StageII	0.947953	1	0.65182	1.02417	1.02417
OTU_27	0.204715	1	0.165579	4	2.02708	2.02708	1.13808	0.569041	1.01539	3.66009	4	1.8586	1.8586	1.07519	0.537594	1.02441	3.29291	5	1.64153	1.64153	0.628982	0.281289	1.00947	2.41007	4	1.42969	1.42969	0.689116	0.344558	1.07297	2.46328	5	0.636328	0.636328	0.950846	0.425231	0	2.12914	0.795877	1	0.609608	1.12388	1.12388	CK_StageI up vs CK_StageII	0.534607	1	0.529397	1.30636	1.30636
OTU_84	0.214083	1	0.168538	4	1.59211	1.59211	1.11563	0.557813	0	2.51947	4	0.823077	0.823077	0.950422	0.475211	0	1.65243	5	0.537216	0.537216	0.769187	0.343991	0	1.66091	4	1.49891	1.49891	0.500439	0.25022	1.08823	2.10811	5	0.651457	0.651457	0.59514	0.266155	0	1.11742	0.193666	1	0.365373	1.70412	1.70412	CK_StageI up vs CK_StageII	0.0669967	1	0.257219	2.07756	2.07756
OTU_28	0.214503	1	0.168538	4	1.47889	1.47889	1.71314	0.856572	0	3.12536	4	2.70791	2.70791	0.242541	0.121271	2.40252	2.92612	5	1.90435	1.90435	0.561528	0.251123	1.05572	2.43049	4	2.45976	2.45976	0.55659	0.278295	1.68145	2.95545	5	1.63094	1.63094	0.509632	0.227914	1.08737	2.14048	0.0560245	1	0.246324	0.426605	-2.34409	CK_StageI down vs CK_StageII	0.464468	1	0.512502	0.744598	-1.34301
OTU_128	0.227003	1	0.175848	4	1.91697	1.91697	1.35514	0.677572	0	3.12536	4	2.35417	2.35417	0.358627	0.179314	2.07568	2.84895	5	3.24232	3.24232	0.13911	0.0622121	3.04376	3.42072	4	2.55367	2.55367	1.20121	0.600606	1.08823	3.83239	5	2.10898	2.10898	0.871998	0.389969	1.1093	3.48894	0.494672	1	0.539643	0.738567	-1.35397	CK_StageI down vs CK_StageII	0.039508	1	0.209908	0.399052	-2.50594
OTU_602	0.233687	1	0.178511	4	2.82334	2.82334	0.856404	0.428202	2.02303	3.78718	4	3.23733	3.23733	0.446299	0.223149	2.70056	3.79304	5	2.21546	2.21546	0.843647	0.377291	1.02517	3.09613	4	3.01816	3.01816	0.349801	0.1749	2.72915	3.45072	5	2.6882	2.6882	0.594344	0.265799	1.73949	3.14959	0.388028	1	0.474726	0.750543	-1.33237	CK_StageI down vs CK_StageII	0.188151	1	0.34677	1.52402	1.52402
OTU_512	0.241282	1	0.181788	4	4.61868	4.61868	0.309429	0.154715	4.22893	4.98384	4	5.0837	5.0837	0.319935	0.159967	4.68098	5.4048	5	5.16599	5.16599	0.124127	0.0555111	5.00252	5.31596	4	5.09953	5.09953	0.397811	0.198905	4.5669	5.52816	5	4.98403	4.98403	0.518538	0.231897	4.09691	5.41345	0.0855388	1	0.30794	0.724458	-1.38034	CK_StageI down vs CK_StageII	0.0368843	1	0.209908	0.684293	-1.46136
OTU_17	0.250234	1	0.185984	4	1.12539	1.12539	0.824996	0.412498	0	1.75141	4	1.85729	1.85729	0.946694	0.473347	1.02441	2.70056	5	1.52134	1.52134	1.00267	0.448409	0	2.41007	4	2.80342	2.80342	1.20377	0.601885	1.08823	3.86996	5	1.95412	1.95412	1.11776	0.499878	0	2.74024	0.32983	1	0.448785	0.602113	-1.66082	CK_StageI down vs CK_StageII	0.574754	1	0.529397	0.759989	-1.31581
OTU_45	0.266512	1	0.19182	4	0.951393	0.951393	1.316	0.657998	0	2.79018	4	0.518825	0.518825	0.599186	0.299593	0	1.05089	5	1.52172	1.52172	0.262412	0.117354	1.05572	1.67599	4	0.427339	0.427339	0.854678	0.427339	0	1.70936	5	0.997942	0.997942	0.619126	0.276882	0	1.71049	0.442142	1	0.507992	1.34963	1.34963	CK_StageI up vs CK_StageII	0.289338	1	0.45741	0.673462	-1.48486
OTU_57	0.270998	1	0.19182	4	2.29776	2.29776	1.11122	0.555608	1.1266	3.61305	4	1.70792	1.70792	0.479007	0.239503	1.04138	2.07568	5	1.60582	1.60582	0.66621	0.297938	1.02517	2.67666	4	2.42669	2.42669	0.340966	0.170483	2.1304	2.73885	5	2.04963	2.04963	0.176046	0.0787303	1.73949	2.16099	0.199602	1	0.365373	1.50507	1.50507	CK_StageI up vs CK_StageII	0.117227	1	0.277902	1.61545	1.61545
OTU_164	0.271495	1	0.19182	4	0.883716	0.883716	1.19093	0.595465	0	2.51947	4	0.779171	0.779171	0.519563	0.259782	0	1.05089	5	1.80179	1.80179	1.11165	0.497144	0	2.92337	4	1.15487	1.15487	0.997597	0.498799	0	2.43696	5	2.36859	2.36859	1.72034	0.769361	0	3.89616	0.904071	1	0.629933	1.07515	1.07515	CK_StageI up vs CK_StageII	0.273196	1	0.451825	0.529216	-1.88959
OTU_90	0.272036	1	0.19182	4	1.85677	1.85677	0.81432	0.40716	1.07297	2.99727	4	2.03979	2.03979	0.6843	0.34215	1.07046	2.62542	5	1.38705	1.38705	0.953017	0.426202	0	2.60071	4	0.968068	0.968068	0.710052	0.355026	0	1.70936	5	2.33531	2.33531	1.32952	0.594581	1.08737	4.44846	0.790335	1	0.609608	0.88086	-1.13525	CK_StageI down vs CK_StageII	0.474897	1	0.515672	1.38484	1.38484
OTU_108	0.283231	1	0.193948	4	1.98968	1.98968	0.383741	0.19187	1.68145	2.51947	4	1.93879	1.93879	0.740657	0.370329	1.04138	2.70056	5	1.67816	1.67816	1.23749	0.553423	0	3.04376	4	2.30898	2.30898	0.527859	0.26393	1.70144	2.95829	5	1.12836	1.12836	0.700399	0.313228	0	1.72893	0.929786	1	0.639598	1.03591	1.03591	CK_StageI up vs CK_StageII	0.571489	1	0.529397	1.24102	1.24102
OTU_287	0.284702	1	0.193948	4	1.72919	1.72919	1.31191	0.655957	0	3.12536	4	1.45016	1.45016	1.1887	0.594349	0	2.70056	5	2.86697	2.86697	1.05337	0.47108	1.05572	3.71787	4	2.16403	2.16403	0.935208	0.467604	1.08823	3.12536	5	2.63891	2.63891	0.878305	0.39279	1.65454	3.47557	0.717436	1	0.591474	1.21338	1.21338	CK_StageI up vs CK_StageII	0.132162	1	0.289948	0.454458	-2.20042
OTU_102	0.285632	1	0.193948	4	0.706093	0.706093	0.861086	0.430543	0	1.75141	4	1.60316	1.60316	0.431215	0.215608	1.05089	2.10445	5	2.08185	2.08185	0.484297	0.216584	1.59758	2.69788	4	1.43495	1.43495	1.23874	0.619369	0	2.9654	5	1.57395	1.57395	1.11863	0.500266	0	2.96683	0.17007	1	0.36479	0.536977	-1.86228	CK_StageI down vs CK_StageII	0.0332975	1	0.209908	0.38535	-2.59505
OTU_49	0.299637	1	0.200976	4	3.45821	3.45821	0.168574	0.0842868	3.29719	3.68193	4	2.92965	2.92965	0.503987	0.251994	2.38758	3.44639	5	2.86086	2.86086	0.305695	0.136711	2.36199	3.11834	4	3.00835	3.00835	0.436327	0.218164	2.43696	3.48001	5	2.71773	2.71773	0.791143	0.35381	1.72893	3.62803	0.155326	1	0.362523	1.44249	1.44249	CK_StageI up vs CK_StageII	0.0944143	1	0.277902	1.51293	1.51293
OTU_111	0.306841	1	0.203328	4	3.14933	3.14933	0.296098	0.148049	2.76992	3.48729	4	2.21096	2.21096	0.663658	0.331829	1.63988	2.92612	5	2.215	2.215	1.25496	0.561236	0	3.11834	4	2.39269	2.39269	0.530238	0.265119	1.68145	2.9654	5	1.91863	1.91863	0.890958	0.398449	1.0525	2.95404	0.131175	1	0.342389	1.91636	1.91636	CK_StageI up vs CK_StageII	0.114324	1	0.277902	1.91101	1.91101
OTU_176	0.315775	1	0.205288	4	1.09318	1.09318	0.89257	0.446285	0	2.18596	4	0.814325	0.814325	0.940346	0.470173	0	1.63988	5	0.748912	0.748912	0.720285	0.322121	0	1.61842	4	1.2852	1.2852	1.22831	0.614153	0	2.95829	5	1.96171	1.96171	0.943567	0.421976	1.0525	3.33498	0.681909	1	0.589124	1.21323	1.21323	CK_StageI up vs CK_StageII	0.594419	1	0.5325	1.26951	1.26951
OTU_56	0.319956	1	0.205288	4	2.57375	2.57375	0.856622	0.428311	1.60545	3.38784	4	1.81106	1.81106	0.493998	0.246999	1.07046	2.07568	5	1.58845	1.58845	1.14736	0.513117	0	2.90429	4	2.334	2.334	0.416396	0.208198	2.10811	2.95829	5	1.94465	1.94465	0.351206	0.157064	1.70031	2.50547	0.161121	1	0.362523	1.69665	1.69665	CK_StageI up vs CK_StageII	0.0623017	1	0.255532	1.97973	1.97973
OTU_7	0.320996	1	0.205288	4	3.76693	3.76693	0.915185	0.457593	2.83364	4.81859	4	4.27653	4.27653	0.53037	0.265185	3.58509	4.80154	5	3.90304	3.90304	0.272108	0.12169	3.55918	4.2171	4	4.51515	4.51515	0.52219	0.261095	3.96714	5.22197	5	3.93535	3.93535	0.435473	0.194749	3.52686	4.62188	0.211153	1	0.367707	0.702419	-1.42365	CK_StageI down vs CK_StageII	0.719005	1	0.574762	0.909971	-1.09894
OTU_43	0.337466	1	0.211979	4	1.66014	1.66014	1.1112	0.555599	0	2.34648	4	2.03844	2.03844	1.38428	0.692142	1.02441	3.9832	5	2.08695	2.08695	0.662876	0.296447	1.05572	2.85024	4	2.88827	2.88827	0.212582	0.106291	2.7046	3.15392	5	1.75456	1.75456	0.712952	0.318842	1.0525	2.72777	0.554429	1	0.555604	0.769342	-1.29981	CK_StageI down vs CK_StageII	0.482993	1	0.519217	0.743903	-1.34426
OTU_69	0.342118	1	0.211979	4	3.30268	3.30268	0.696493	0.348247	2.49993	4.19886	4	3.27527	3.27527	0.256668	0.128334	2.89353	3.44639	5	2.20606	2.20606	1.40632	0.628924	0	3.29006	4	3.12884	3.12884	0.777773	0.388886	2.13921	3.96714	5	2.52367	2.52367	1.03121	0.461169	1.09516	3.90337	0.96822	1	0.649489	1.01918	1.01918	CK_StageI up vs CK_StageII	0.106442	1	0.277902	2.13854	2.13854
OTU_448	0.346699	1	0.211979	4	1.3307	1.3307	1.00475	0.502377	0	2.18596	4	2.15233	2.15233	0.562584	0.281292	1.65243	2.65329	5	2.32607	2.32607	0.939992	0.420377	1.61842	3.90917	4	2.68044	2.68044	1.18069	0.590345	1.09429	3.94005	5	1.74384	1.74384	1.05114	0.470085	0	2.76278	0.249073	1	0.392814	0.565802	-1.7674	CK_StageI down vs CK_StageII	0.145879	1	0.290416	0.501604	-1.9936
OTU_413	0.347296	1	0.211979	4	0	2.22045e-16	0	0	0	0	4	1.45378	1.45378	0.505477	0.252739	1.02441	2.06164	5	0.748559	0.748559	0.732159	0.327432	0	1.67599	4	0.545628	0.545628	0.630042	0.315021	0	1.09429	5	1.05881	1.05881	1.81227	0.81047	0	4.18474	0.0570195	1	0.246324	0.365064	-2.73924	CK_StageI down vs CK_StageII	0.283239	1	0.456244	0.595198	-1.68011
OTU_19	0.350729	1	0.211979	4	2.52228	2.52228	1.13118	0.565588	1.60545	4.01202	4	1.79326	1.79326	0.606571	0.303285	1.02441	2.43308	5	1.68779	1.68779	1.151	0.514745	0	2.67929	4	2.36012	2.36012	0.299259	0.14963	2.10811	2.73885	5	2.57075	2.57075	0.451582	0.201954	2.12914	3.16262	0.223606	1	0.37153	1.6575	1.6575	CK_StageI up vs CK_StageII	0.145883	1	0.290416	1.78322	1.78322
OTU_1173	0.363261	1	0.213907	4	0.281649	0.281649	0.563299	0.281649	0	1.1266	4	0	0	0	0	0	0	5	0	1.35525e-20	0	0	0	0	4	0	0	0	0	0	0	5	0	3.12792e-17	0	0	0	0	0.110599	1	0.32283	1.21558	1.21558	CK_StageI up vs CK_StageII	0.0939229	1	0.277902	1.21558	1.21558
OTU_426	0.363635	1	0.213907	4	1.10337	1.10337	0.775505	0.387753	0	1.68145	4	1.91652	1.91652	0.79938	0.39969	1.02441	2.92612	5	1.40018	1.40018	0.308554	0.13799	1.05733	1.65878	4	0.967736	0.967736	0.708339	0.35417	0	1.70369	5	1.70122	1.70122	0.991914	0.443597	0	2.50547	0.143218	1	0.359709	0.569138	-1.75704	CK_StageI down vs CK_StageII	0.562592	1	0.529397	0.814051	-1.22842
OTU_40	0.367329	1	0.213907	4	3.64635	3.64635	0.884198	0.442099	2.83364	4.72172	4	3.84732	3.84732	0.834238	0.417119	2.70056	4.5699	5	3.71914	3.71914	0.185977	0.0831713	3.44351	3.92452	4	2.94395	2.94395	0.944492	0.472246	1.70936	3.74581	5	3.21935	3.21935	0.655567	0.293178	2.40503	4.06592	0.700411	1	0.589124	0.869966	-1.14947	CK_StageI down vs CK_StageII	0.882998	1	0.631515	0.9508	-1.05175
OTU_18	0.372515	1	0.213907	4	3.28231	3.28231	0.360663	0.180331	3.01803	3.78718	4	3.7568	3.7568	0.45175	0.225875	3.39559	4.41714	5	3.84199	3.84199	0.632922	0.283051	3.09889	4.57133	4	2.98892	2.98892	1.0935	0.546748	1.70936	4.04024	5	3.19087	3.19087	0.847939	0.37921	2.12914	4.18474	0.371058	1	0.474726	0.719717	-1.38943	CK_StageI down vs CK_StageII	0.269141	1	0.451825	0.678453	-1.47394
OTU_66	0.37824	1	0.213907	4	2.43424	2.43424	0.221174	0.110587	2.18596	2.7046	4	2.82253	2.82253	0.672941	0.336471	2.06164	3.67694	5	2.26962	2.26962	0.698135	0.312215	1.05733	2.82355	4	2.88375	2.88375	0.496961	0.248481	2.46328	3.45072	5	2.70604	2.70604	0.337284	0.150838	2.16099	3.00316	0.308482	1	0.438368	0.764035	-1.30884	CK_StageI down vs CK_StageII	0.644909	1	0.55022	1.12087	1.12087
OTU_152	0.380999	1	0.213907	4	1.29191	1.29191	0.86179	0.430895	0	1.75141	4	1.19881	1.19881	0.908065	0.454033	0	2.10445	5	1.0433	1.0433	0.0248737	0.0111239	1.00947	1.0688	4	2.40656	2.40656	2.0588	1.0294	0	5.02377	5	1.61343	1.61343	0.578305	0.258626	1.08737	2.50547	0.901719	1	0.629933	1.06666	1.06666	CK_StageI up vs CK_StageII	0.728565	1	0.574762	1.18806	1.18806
OTU_214	0.382157	1	0.213907	4	0.560099	0.560099	0.646767	0.323384	0	1.1266	4	0.682266	0.682266	0.828389	0.414195	0	1.67817	5	1.404	1.404	0.339375	0.151773	1.00947	1.67599	4	0.847702	0.847702	0.978908	0.489454	0	1.70936	5	1.41495	1.41495	1.06742	0.477363	0	2.74024	0.834019	1	0.617229	0.918806	-1.08837	CK_StageI down vs CK_StageII	0.139693	1	0.290416	0.557135	-1.7949
OTU_189	0.385033	1	0.213907	4	1.5507	1.5507	1.14725	0.573626	0	2.76992	4	2.21817	2.21817	0.850538	0.425269	1.07046	2.87759	5	2.04804	2.04804	1.05734	0.472859	1.00947	3.44351	4	2.67969	2.67969	0.943469	0.471734	1.68145	3.75337	5	2.65827	2.65827	0.516813	0.231126	2.12914	3.48894	0.318284	1	0.446424	0.629607	-1.58829	CK_StageI down vs CK_StageII	0.43051	1	0.50578	0.708407	-1.41162
OTU_38	0.392639	1	0.215952	4	4.52718	4.52718	0.481887	0.240943	4.02872	5.07022	4	4.94067	4.94067	0.33148	0.16574	4.65549	5.41956	5	4.69068	4.69068	0.340762	0.152393	4.12643	4.97247	4	4.44079	4.44079	0.413753	0.206877	3.85932	4.81188	5	4.72028	4.72028	0.288202	0.128888	4.28677	4.97312	0.133151	1	0.342389	0.750805	-1.3319	CK_StageI down vs CK_StageII	0.519699	1	0.529397	0.892854	-1.12
OTU_103	0.402926	1	0.219415	4	4.32184	4.32184	0.559619	0.27981	3.68193	4.85497	4	4.71766	4.71766	0.392008	0.196004	4.43846	5.28892	5	4.30468	4.30468	0.584216	0.261269	3.68552	4.86335	4	4.05553	4.05553	0.541909	0.270955	3.61604	4.81188	5	4.0892	4.0892	0.491046	0.219602	3.32177	4.49767	0.297482	1	0.438368	0.760056	-1.31569	CK_StageI down vs CK_StageII	0.961397	1	0.654115	1.01197	1.01197
OTU_390	0.428927	1	0.231284	4	0.800538	0.800538	0.535217	0.267608	0	1.1138	4	0.262723	0.262723	0.525446	0.262723	0	1.05089	5	0.211467	0.211467	0.472854	0.211467	0	1.05733	4	0.268241	0.268241	0.536483	0.268241	0	1.07297	5	0.219031	0.219031	0.489769	0.219031	0	1.09516	0.153459	1	0.362523	1.45177	1.45177	CK_StageI up vs CK_StageII	0.10264	1	0.277902	1.50428	1.50428
OTU_11	0.447821	1	0.239128	4	3.29294	3.29294	0.253986	0.126993	2.99727	3.58947	4	3.33951	3.33951	0.634206	0.317103	2.43308	3.88329	5	3.35784	3.35784	0.470082	0.210227	2.69788	3.85375	4	2.58639	2.58639	1.14499	0.572495	1.09429	3.83239	5	3.0529	3.0529	0.59956	0.268131	2.45928	3.77942	0.922956	1	0.638969	0.968232	-1.03281	CK_StageI down vs CK_StageII	0.887059	1	0.631515	0.956012	-1.04601
OTU_61	0.45759	1	0.241994	4	2.45071	2.45071	0.077899	0.0389495	2.34648	2.51947	4	2.37675	2.37675	0.72031	0.360155	1.67817	3.36557	5	2.09121	2.09121	0.605204	0.270656	1.61842	2.82355	4	2.90155	2.90155	0.934762	0.467381	1.68145	3.85932	5	2.55023	2.55023	0.536289	0.239836	1.72893	3.09065	0.870708	1	0.618661	1.0526	1.0526	CK_StageI up vs CK_StageII	0.408959	1	0.50578	1.28298	1.28298
OTU_126	0.465831	1	0.242581	4	1.38182	1.38182	0.303734	0.151867	1.1138	1.68145	4	1.83969	1.83969	1.26973	0.634867	0	2.89353	5	1.72175	1.72175	0.63847	0.285532	1.02517	2.41007	4	2.28177	2.28177	1.12388	0.561941	1.08995	3.62653	5	1.10312	1.10312	1.17765	0.526661	0	2.76278	0.514489	1	0.550147	0.728061	-1.37351	CK_StageI down vs CK_StageII	0.609074	1	0.541119	0.79008	-1.2657
OTU_55	0.4688	1	0.242581	4	2.81127	2.81127	0.522552	0.261276	2.10811	3.34951	4	1.94125	1.94125	0.752725	0.376362	1.02441	2.70056	5	1.92829	1.92829	0.527016	0.235689	1.00947	2.36199	4	1.76587	1.76587	1.18763	0.593817	0	2.46996	5	1.85275	1.85275	1.18529	0.530076	0	3.26197	0.184958	1	0.365373	1.82769	1.82769	CK_StageI up vs CK_StageII	0.157665	1	0.30266	1.84418	1.84418
OTU_2102	0.479561	1	0.242581	4	1.02634	1.02634	1.2401	0.620052	0	2.49993	4	2.0452	2.0452	0.299064	0.149532	1.63988	2.36079	5	1.35504	1.35504	1.47128	0.657978	0	3.55918	4	1.22716	1.22716	0.922015	0.461008	0	2.13291	5	0.770071	0.770071	0.750142	0.335474	0	1.71049	0.183308	1	0.365373	0.493508	-2.02631	CK_StageI down vs CK_StageII	0.643122	1	0.55022	0.796258	-1.25587
OTU_140	0.493653	1	0.242581	4	2.45384	2.45384	0.582108	0.291054	1.68145	2.99727	4	2.29598	2.29598	0.879358	0.439679	1.05089	3.07166	5	2.00402	2.00402	0.691109	0.309073	1.02517	2.82355	4	2.78107	2.78107	0.748915	0.374458	1.68145	3.33351	5	2.66319	2.66319	0.603069	0.269701	2.14048	3.5535	0.754427	1	0.592788	1.11564	1.11564	CK_StageI up vs CK_StageII	0.353042	1	0.486878	1.36587	1.36587
OTU_16	0.495356	1	0.242581	4	2.60556	2.60556	1.18469	0.592346	1.07297	3.80918	4	2.72711	2.72711	0.91363	0.456815	1.63988	3.79304	5	2.92714	2.92714	0.671517	0.300311	2.01418	3.80457	4	3.50079	3.50079	0.569051	0.284526	2.73191	4.07819	5	2.69268	2.69268	0.429353	0.192012	2.12914	3.19961	0.827246	1	0.617229	0.919199	-1.0879	CK_StageI down vs CK_StageII	0.544727	1	0.529397	0.800192	-1.2497
OTU_52	0.497325	1	0.242581	4	2.42351	2.42351	0.904769	0.452385	1.07297	2.99727	4	1.96412	1.96412	0.217946	0.108973	1.63988	2.10445	5	1.9933	1.9933	0.473782	0.211882	1.61842	2.60071	4	1.65221	1.65221	0.420186	0.210093	1.08995	2.10811	5	1.82116	1.82116	0.783551	0.350415	1.08737	2.77567	0.307452	1	0.438368	1.37497	1.37497	CK_StageI up vs CK_StageII	0.313529	1	0.468117	1.34743	1.34743
OTU_127	0.499102	1	0.242581	4	0.549891	0.549891	0.635336	0.317668	0	1.1266	4	0.933689	0.933689	0.6825	0.34125	0	1.63988	5	1.34176	1.34176	0.897077	0.401185	0	2.41007	4	1.41833	1.41833	1.11713	0.558563	0	2.46996	5	0.874875	0.874875	0.48971	0.219005	0	1.11742	0.499732	1	0.539711	0.766417	-1.30477	CK_StageI down vs CK_StageII	0.151996	1	0.297084	0.577595	-1.73132
OTU_114	0.501692	1	0.242581	4	3.06264	3.06264	0.572258	0.286129	2.51947	3.83581	4	3.6846	3.6846	0.840842	0.420421	2.62542	4.41714	5	3.51097	3.51097	0.67953	0.303895	2.43049	4.2171	4	3.6898	3.6898	0.6628	0.3314	2.9654	4.33538	5	3.10879	3.10879	0.621772	0.278065	2.07804	3.61454	0.211858	1	0.367707	0.649789	-1.53896	CK_StageI down vs CK_StageII	0.338095	1	0.486878	0.732893	-1.36446
OTU_112	0.502643	1	0.242581	4	1.95145	1.95145	0.63603	0.318015	1.01539	2.43696	4	2.75626	2.75626	0.704451	0.352225	2.03646	3.65995	5	2.12424	2.12424	0.525533	0.235026	1.59758	2.85024	4	1.97601	1.97601	1.32316	0.661578	0	2.73885	5	2.55819	2.55819	0.668213	0.298834	1.72893	3.26197	0.172262	1	0.36479	0.572438	-1.74692	CK_StageI down vs CK_StageII	0.751017	1	0.580823	0.887127	-1.12723
OTU_3	0.503824	1	0.242581	4	3.01133	3.01133	1.38156	0.690779	1.68145	4.55368	4	2.90308	2.90308	0.35014	0.17507	2.43308	3.2592	5	3.39212	3.39212	0.829525	0.370975	2.08279	4.3547	4	3.70749	3.70749	0.345412	0.172706	3.32616	4.16123	5	3.77639	3.77639	0.985349	0.440662	2.49304	4.74044	0.863545	1	0.618661	1.07793	1.07793	CK_StageI up vs CK_StageII	0.526312	1	0.529397	0.76802	-1.30205
OTU_193	0.512488	1	0.242581	4	0.964879	0.964879	1.12362	0.561811	0	2.10811	4	0.868245	0.868245	1.14055	0.570276	0	2.40252	5	1.66012	1.66012	1.01842	0.45545	0	2.62667	4	2.03234	2.03234	1.36793	0.683967	0	2.93027	5	1.54484	1.54484	0.719639	0.321832	1.0525	2.72777	0.900025	1	0.629933	1.06928	1.06928	CK_StageI up vs CK_StageII	0.347053	1	0.486878	0.617604	-1.61916
OTU_424	0.524112	1	0.242581	4	1.78071	1.78071	1.19486	0.597432	0	2.49993	4	0.934819	0.934819	1.26134	0.630668	0	2.66881	5	0.618451	0.618451	0.927984	0.415007	0	2.08279	4	0.698931	0.698931	0.844262	0.422131	0	1.70144	5	0.722093	0.722093	1.10191	0.492788	0	2.49304	0.279499	1	0.425153	1.79738	1.79738	CK_StageI up vs CK_StageII	0.124086	1	0.277902	2.23808	2.23808
OTU_85	0.526997	1	0.242581	4	2.70859	2.70859	0.909355	0.454678	1.68145	3.80918	4	2.36575	2.36575	0.342168	0.171084	2.03646	2.66881	5	2.38477	2.38477	0.674386	0.301594	1.61842	2.90429	4	2.02042	2.02042	0.213076	0.106538	1.70144	2.13921	5	1.88787	1.88787	1.08808	0.486605	0	2.72777	0.525764	1	0.551865	1.26825	1.26825	CK_StageI up vs CK_StageII	0.527555	1	0.529397	1.25165	1.25165
OTU_44	0.529512	1	0.242581	4	1.86236	1.86236	0.531282	0.265641	1.07297	2.18596	4	2.11356	2.11356	0.954664	0.477332	1.02441	3.12114	5	2.01387	2.01387	0.85299	0.381469	1.05572	3.11834	4	1.99554	1.99554	0.365078	0.182539	1.70144	2.46328	5	1.32486	1.32486	0.83938	0.375382	0	2.16099	0.644279	1	0.589124	0.840197	-1.1902	CK_StageI down vs CK_StageII	0.768677	1	0.581921	0.90031	-1.11073
OTU_237	0.532419	1	0.242581	4	0.702012	0.702012	0.841668	0.420834	0	1.68145	4	0	0	0	0	0	0	5	0.961148	0.961148	2.14919	0.961148	0	4.80574	4	0	0	0	0	0	0	5	0	2.11257e-16	0	0	0	0	0.379735	1	0.474726	1.62677	1.62677	CK_StageI up vs CK_StageII	0.729965	1	0.574762	0.835588	-1.19676
OTU_70	0.535405	1	0.242581	4	2.1741	2.1741	1.93267	0.966333	0	4.04024	4	1.82068	1.82068	1.62343	0.811714	0	3.95213	5	2.68521	2.68521	0.789381	0.353022	1.66091	3.44351	4	3.15786	3.15786	0.74533	0.372665	2.10811	3.75337	5	2.85883	2.85883	0.623877	0.279006	2.12914	3.62803	0.684353	1	0.589124	1.27759	1.27759	CK_StageI up vs CK_StageII	0.536771	1	0.529397	0.70168	-1.42515
OTU_630	0.53624	1	0.242581	4	0.268241	0.268241	0.536483	0.268241	0	1.07297	4	0.771512	0.771512	0.986382	0.493191	0	2.06164	5	0	5.55112e-17	0	0	0	0	4	0.272488	0.272488	0.544976	0.272488	0	1.08995	5	0.347899	0.347899	0.777926	0.347899	0	1.73949	0.28591	1	0.428865	0.705505	-1.41742	CK_StageI down vs CK_StageII	0.544115	1	0.529397	1.20434	1.20434
OTU_25	0.538088	1	0.242581	4	2.80373	2.80373	0.861417	0.430708	1.60545	3.54237	4	2.77189	2.77189	0.66102	0.33051	2.10445	3.55067	5	2.73728	2.73728	0.202438	0.090533	2.4126	2.92337	4	1.93314	1.93314	1.36097	0.680486	0	3.16116	5	2.42631	2.42631	0.786668	0.351809	1.1093	3.09065	0.957403	1	0.648178	1.02232	1.02232	CK_StageI up vs CK_StageII	0.906486	1	0.63691	1.04714	1.04714
OTU_73	0.565521	1	0.250308	4	0.532297	0.532297	0.615955	0.307978	0	1.1138	4	0.779171	0.779171	0.519563	0.259782	0	1.05089	5	0.740242	0.740242	1.02683	0.459211	0	2.08279	4	1.33383	1.33383	1.01234	0.506172	0	2.13291	5	1.24277	1.24277	0.741172	0.331462	0	1.73949	0.675703	1	0.589124	0.84272	-1.18663	CK_StageI down vs CK_StageII	0.710165	1	0.574006	0.86577	-1.15504
OTU_717	0.568913	1	0.250308	4	0.505756	0.505756	1.01151	0.505756	0	2.02303	4	0.883453	0.883453	1.76691	0.883453	0	3.53381	5	0	2.77556e-17	0	0	0	0	4	0	0	0	0	0	0	5	0.217473	0.217473	0.486285	0.217473	0	1.08737	0.555084	1	0.555604	0.769665	-1.29927	CK_StageI down vs CK_StageII	0.407251	1	0.50578	1.41987	1.41987
OTU_826	0.575097	1	0.250308	4	0.281649	0.281649	0.563299	0.281649	0	1.1266	4	0	0	0	0	0	0	5	0.213761	0.213761	0.477984	0.213761	0	1.0688	4	0	0	0	0	0	0	5	0	6.09457e-17	0	0	0	0	0.245723	1	0.392814	1.21558	1.21558	CK_StageI up vs CK_StageII	0.76371	1	0.581921	1.04818	1.04818
OTU_263	0.576386	1	0.250308	4	2.52234	2.52234	0.451102	0.225551	2.1675	3.12536	4	3.13721	3.13721	0.807156	0.403578	2.06164	4.00048	5	2.63274	2.63274	0.48282	0.215924	2.08517	3.36692	4	2.26506	2.26506	1.56279	0.781397	0	3.58947	5	2.06059	2.06059	1.20212	0.537603	0	2.98995	0.391209	1	0.474726	0.652987	-1.53142	CK_StageI down vs CK_StageII	0.869712	1	0.627477	0.926332	-1.07953
OTU_188	0.581309	1	0.250308	4	0	1.11022e-16	0	0	0	0	4	0.267616	0.267616	0.535232	0.267616	0	1.07046	5	0	1.11022e-16	0	0	0	0	4	0	0	0	0	0	0	5	0.972802	0.972802	2.17525	0.972802	0	4.86401	0.730042	1	0.592788	0.830691	-1.20382	CK_StageI down vs CK_StageII	1	1	0.659509	1	1
OTU_486	0.588989	1	0.250308	4	0.281649	0.281649	0.563299	0.281649	0	1.1266	4	0.523069	0.523069	0.604001	0.302	0	1.05089	5	0.534076	0.534076	0.766725	0.34289	0	1.66091	4	0.42536	0.42536	0.85072	0.42536	0	1.70144	5	1.00626	1.00626	0.627553	0.28065	0	1.73949	0.628133	1	0.588758	0.845912	-1.18216	CK_StageI down vs CK_StageII	0.593734	1	0.5325	0.839483	-1.19121
OTU_120	0.592352	1	0.250308	4	3.07633	3.07633	0.454423	0.227212	2.49993	3.48729	4	3.21116	3.21116	0.803646	0.401823	2.62542	4.39957	5	3.09674	3.09674	0.266843	0.119336	2.82355	3.44351	4	2.71471	2.71471	0.534324	0.267162	2.13291	3.33351	5	3.22583	3.22583	0.357629	0.159937	2.77567	3.75489	0.70635	1	0.589124	0.910778	-1.09796	CK_StageI down vs CK_StageII	0.95196	1	0.65182	0.985952	-1.01425
OTU_159	0.599945	1	0.250308	4	0.535497	0.535497	0.620003	0.310002	0	1.1266	4	0.267616	0.267616	0.535232	0.267616	0	1.07046	5	0.211467	0.211467	0.472854	0.211467	0	1.05733	4	0	0	0	0	0	0	5	0.439333	0.439333	0.601632	0.269058	0	1.1093	0.464386	1	0.522434	1.20404	1.20404	CK_StageI up vs CK_StageII	0.35327	1	0.486878	1.25182	1.25182
OTU_227	0.600269	1	0.250308	4	0.955784	0.955784	0.715924	0.357962	0	1.73478	4	1.12724	1.12724	0.977785	0.488892	0	2.38758	5	1.89268	1.89268	0.736184	0.329231	1.02517	3.01653	4	1.80214	1.80214	0.679376	0.339688	1.09429	2.72915	5	1.92845	1.92845	1.88533	0.843145	0	4.28677	0.834403	1	0.617229	0.887949	-1.12619	CK_StageI down vs CK_StageII	0.238076	1	0.412793	0.522355	-1.91441
OTU_31	0.600739	1	0.250308	4	3.16117	3.16117	0.404941	0.20247	2.61052	3.54237	4	3.31539	3.31539	0.713963	0.356982	2.38758	3.90049	5	3.385	3.385	0.723958	0.323764	2.33705	4.19061	4	3.47613	3.47613	0.336347	0.168174	3.15392	3.94005	5	2.90724	2.90724	0.539199	0.241137	2.17273	3.67979	0.70913	1	0.589124	0.898614	-1.11282	CK_StageI down vs CK_StageII	0.569305	1	0.529397	0.856288	-1.16783
OTU_306	0.624063	1	0.258071	4	0.527027	0.527027	1.05405	0.527027	0	2.10811	4	0.859619	0.859619	1.13272	0.566359	0	2.38758	5	1.20975	1.20975	1.26704	0.566639	0	2.62667	4	1.69898	1.69898	0.0121539	0.00607695	1.68145	1.70936	5	0.835603	0.835603	1.34567	0.601802	0	3.09065	0.676353	1	0.589124	0.794108	-1.25927	CK_StageI down vs CK_StageII	0.370933	1	0.498442	0.62299	-1.60516
OTU_259	0.628969	1	0.258159	4	1.08713	1.08713	0.861495	0.430747	0	2.10811	4	0.523069	0.523069	0.604001	0.302	0	1.05089	5	0.520142	0.520142	1.16307	0.520142	0	2.60071	4	0.544545	0.544545	0.628786	0.314393	0	1.08995	5	0.223485	0.223485	0.499727	0.223485	0	1.11742	0.333485	1	0.448785	1.47842	1.47842	CK_StageI up vs CK_StageII	0.306313	1	0.463783	1.48142	1.48142
OTU_551	0.636577	1	0.258225	4	2.36985	2.36985	0.23388	0.11694	2.02303	2.51947	4	2.65101	2.65101	0.751555	0.375777	1.63988	3.44639	5	2.63411	2.63411	0.299407	0.133899	2.33705	3.09889	4	2.87465	2.87465	0.29942	0.14971	2.7046	3.32323	5	2.76859	2.76859	0.580117	0.259436	2.16099	3.61454	0.413953	1	0.486987	0.822929	-1.21517	CK_StageI down vs CK_StageII	0.418203	1	0.50578	0.832624	-1.20102
OTU_58	0.638521	1	0.258225	4	2.58699	2.58699	1.77982	0.88991	0	3.83239	4	2.30797	2.30797	1.61956	0.809781	0	3.58509	5	3.14385	3.14385	0.610336	0.272951	2.60071	4.03278	4	3.41388	3.41388	1.18505	0.592524	1.70936	4.45755	5	3.22159	3.22159	0.396596	0.177363	2.95404	3.91026	0.742341	1	0.592788	1.21337	1.21337	CK_StageI up vs CK_StageII	0.491579	1	0.523215	0.679781	-1.47106
OTU_116	0.660781	1	0.264216	4	1.38956	1.38956	0.371273	0.185636	1.01539	1.73478	4	1.79146	1.79146	0.588033	0.294016	1.02441	2.38758	5	1.94623	1.94623	1.23833	0.553796	0	3.29006	4	2.42566	2.42566	0.648097	0.324049	1.70144	3.16116	5	1.88372	1.88372	1.27519	0.570283	0	3.47557	0.557616	1	0.555604	0.756858	-1.32125	CK_StageI down vs CK_StageII	0.394654	1	0.50578	0.679867	-1.47088
OTU_106	0.662942	1	0.264216	4	1.17656	1.17656	1.03318	0.51659	0	2.51947	4	0.934694	0.934694	0.67619	0.338095	0	1.61742	5	1.94011	1.94011	1.11924	0.500537	0	2.85024	4	1.27363	1.27363	0.849169	0.424584	0	1.70936	5	1.3319	1.3319	1.25248	0.560124	0	2.47131	0.743799	1	0.592788	1.18252	1.18252	CK_StageI up vs CK_StageII	0.284357	1	0.456244	0.589043	-1.69767
OTU_24	0.667768	1	0.264225	4	2.87817	2.87817	0.950236	0.475118	1.60545	3.68193	4	2.35951	2.35951	1.07649	0.538243	1.05089	3.6294	5	2.60139	2.60139	0.886325	0.396377	1.59758	3.36692	4	2.09873	2.09873	0.712631	0.356315	1.08995	2.7046	5	2.77034	2.77034	0.449964	0.20123	2.16099	3.33498	0.388166	1	0.474726	1.43263	1.43263	CK_StageI up vs CK_StageII	0.624737	1	0.55022	1.21149	1.21149
OTU_13	0.687713	1	0.26856	4	3.23007	3.23007	0.749442	0.374721	2.49993	4.27695	4	3.46556	3.46556	0.424905	0.212453	2.89353	3.82795	5	3.34908	3.34908	0.606856	0.271394	2.33705	3.90917	4	3.23322	3.23322	0.415533	0.207767	2.73885	3.74581	5	2.95913	2.95913	0.413897	0.185101	2.67142	3.66629	0.543388	1	0.555604	0.849393	-1.17731	CK_StageI down vs CK_StageII	0.745177	1	0.580482	0.92082	-1.08599
OTU_47	0.68849	1	0.26856	4	1.69327	1.69327	0.0657149	0.0328574	1.60545	1.75141	4	0.928517	0.928517	1.0851	0.542548	0	2.06164	5	1.18752	1.18752	1.14894	0.51382	0	2.60071	4	0.853262	0.853262	0.985265	0.492632	0	1.70936	5	1.36669	1.36669	0.764706	0.341987	0	1.73949	0.250964	1	0.392814	1.69908	1.69908	CK_StageI up vs CK_StageII	0.41886	1	0.50578	1.41986	1.41986
OTU_35	0.694134	1	0.268855	4	1.20769	1.20769	0.898009	0.449005	0	2.02303	4	1.19366	1.19366	1.09406	0.54703	0	2.65329	5	1.63376	1.63376	0.591408	0.264486	1.05733	2.41007	4	0.81387	0.81387	0.542654	0.271327	0	1.09429	5	1.29062	1.29062	0.903342	0.403987	0	2.17273	0.98108	1	0.654054	1.00977	1.00977	CK_StageI up vs CK_StageII	0.451673	1	0.50578	0.744287	-1.34357
OTU_343	0.710151	1	0.273135	4	0.701936	0.701936	0.854373	0.427186	0	1.73478	4	1.09069	1.09069	0.776139	0.388069	0	1.65243	5	0.823173	0.823173	0.855143	0.382431	0	2.03759	4	0.966422	0.966422	0.701628	0.350814	0	1.68145	5	1.33886	1.33886	0.34396	0.153823	1.0525	1.72893	0.457066	1	0.519612	0.763787	-1.30927	CK_StageI down vs CK_StageII	0.805454	1	0.597147	0.919399	-1.08767
OTU_724	0.721415	1	0.275541	4	2.35254	2.35254	0.639803	0.319901	1.68145	3.21475	4	1.69895	1.69895	1.43161	0.715805	0	3.50351	5	1.55945	1.55945	1.04357	0.4667	0	2.67666	4	2.24805	2.24805	0.928113	0.464056	1.08995	3.33351	5	1.70131	1.70131	0.992019	0.443644	0	2.49304	0.384836	1	0.474726	1.57308	1.57308	CK_StageI up vs CK_StageII	0.269702	1	0.451825	1.73279	1.73279
OTU_67	0.739062	1	0.279886	4	2.21859	2.21859	1.24258	0.621289	1.01539	3.94005	4	2.31428	2.31428	0.161842	0.080921	2.07568	2.43308	5	2.64951	2.64951	0.741433	0.331579	1.67599	3.33893	4	2.10355	2.10355	0.320309	0.160155	1.68145	2.46061	5	2.03879	2.03879	0.767125	0.343069	1.09516	2.89621	0.858999	1	0.618661	0.935821	-1.06858	CK_StageI down vs CK_StageII	0.403841	1	0.50578	0.741789	-1.34809
OTU_956	0.742971	1	0.279886	4	0.278449	0.278449	0.556898	0.278449	0	1.1138	4	0.530339	0.530339	0.612435	0.306218	0	1.07046	5	0.618394	0.618394	0.564778	0.252576	0	1.05733	4	0.268241	0.268241	0.536483	0.268241	0	1.07297	5	0.219031	0.219031	0.489769	0.219031	0	1.09516	0.526315	1	0.551865	0.839795	-1.19077	CK_StageI down vs CK_StageII	0.370286	1	0.498442	0.790071	-1.26571
OTU_34	0.770617	1	0.285235	4	2.41497	2.41497	0.902242	0.451121	1.07297	3.02683	4	2.11076	2.11076	0.931315	0.465658	1.02441	3.07166	5	2.53999	2.53999	0.864809	0.386754	1.05733	3.29006	4	2.77921	2.77921	0.490254	0.245127	2.43696	3.48744	5	2.55269	2.55269	0.290044	0.129712	2.16099	2.89621	0.564106	1	0.555604	1.23474	1.23474	CK_StageI up vs CK_StageII	0.801929	1	0.597147	0.916996	-1.09052
OTU_1416	0.772292	1	0.285235	4	0.669603	0.669603	0.803169	0.401585	0	1.60545	4	0.671971	0.671971	0.807415	0.403707	0	1.61742	5	1.09553	1.09553	1.67785	0.750357	0	3.80167	4	0.699396	0.699396	0.846467	0.423233	0	1.70936	5	0.219031	0.219031	0.489769	0.219031	0	1.09516	0.99746	1	0.660894	0.99836	-1.00164	CK_StageI down vs CK_StageII	0.54823	1	0.529397	0.744359	-1.34344
OTU_196	0.772728	1	0.285235	4	0.955784	0.955784	0.715924	0.357962	0	1.73478	4	0.260346	0.260346	0.520692	0.260346	0	1.04138	5	0.642874	0.642874	1.43751	0.642874	0	3.21437	4	0.960727	0.960727	1.12351	0.561755	0	2.13921	5	1.00578	1.00578	0.624829	0.279432	0	1.72893	0.324395	1	0.448785	1.61938	1.61938	CK_StageI up vs CK_StageII	0.636413	1	0.55022	1.24221	1.24221
OTU_79	0.781422	1	0.286314	4	1.13979	1.13979	0.822937	0.411468	0	1.75141	4	0.775023	0.775023	0.99251	0.496255	0	2.07568	5	0.545943	0.545943	0.776321	0.347182	0	1.66091	4	1.22642	1.22642	0.919022	0.459511	0	2.10811	5	0.861729	0.861729	0.903344	0.403988	0	2.16099	0.565893	1	0.555604	1.28767	1.28767	CK_StageI up vs CK_StageII	0.329084	1	0.48461	1.50926	1.50926
OTU_161	0.787383	1	0.286314	4	1.34703	1.34703	0.560743	0.280371	1.01539	2.18596	4	1.01644	1.01644	1.20889	0.604444	0	2.38758	5	1.45158	1.45158	1.0606	0.474313	0	2.92337	4	1.22069	1.22069	1.11456	0.557278	0	2.7046	5	1.78754	1.78754	0.566385	0.253295	1.08737	2.67142	0.623178	1	0.588758	1.25753	1.25753	CK_StageI up vs CK_StageII	0.869468	1	0.627477	0.930093	-1.07516
OTU_48	0.791267	1	0.286314	4	0.824939	0.824939	1.04831	0.524155	0	2.18596	4	1.74904	1.74904	1.0406	0.520299	1.02441	3.2427	5	1.40369	1.40369	1.1087	0.495825	0	2.92337	4	1.70572	1.70572	1.54296	0.771481	0	3.62653	5	1.57175	1.57175	1.03361	0.462247	0	2.49304	0.275583	1	0.425153	0.527008	-1.8975	CK_StageI down vs CK_StageII	0.467211	1	0.512502	0.669545	-1.49355
OTU_304	0.887695	1	0.319106	4	2.44876	2.44876	0.507538	0.253769	1.73478	2.93027	4	2.48959	2.48959	0.677008	0.338504	1.65243	3.29291	5	1.94594	1.94594	1.44258	0.645142	0	3.55918	4	2.432	2.432	0.614802	0.307401	1.70936	2.95545	5	2.15927	2.15927	0.977885	0.437323	1.09516	3.14959	0.952386	1	0.648178	0.972099	-1.0287	CK_StageI down vs CK_StageII	0.442258	1	0.50578	1.41698	1.41698
OTU_87	0.915704	1	0.322148	4	2.95234	2.95234	0.449838	0.224919	2.43696	3.52071	4	2.80923	2.80923	0.764838	0.382419	2.10445	3.85236	5	2.6997	2.6997	0.447147	0.19997	2.33705	3.44351	4	3.10468	3.10468	1.06627	0.533135	1.68145	4.26011	5	2.85971	2.85971	0.458014	0.20483	2.47131	3.65238	0.76294	1	0.592788	1.10428	1.10428	CK_StageI up vs CK_StageII	0.575889	1	0.529397	1.19138	1.19138
OTU_65	0.920781	1	0.322148	4	2.30894	2.30894	0.880792	0.440396	1.01539	2.93027	4	2.3329	2.3329	0.528913	0.264457	1.61742	2.89353	5	2.21088	2.21088	0.737536	0.329836	1.00947	2.90429	4	2.53272	2.53272	0.504955	0.252477	2.10811	3.15103	5	2.12991	2.12991	0.618036	0.276394	1.0525	2.50547	0.960264	1	0.648178	0.983529	-1.01675	CK_StageI down vs CK_StageII	0.829936	1	0.611083	1.07033	1.07033
OTU_53	0.921906	1	0.322148	4	1.2766	1.2766	1.26121	0.630606	0	3.01803	4	1.45023	1.45023	1.16992	0.584961	0	2.66881	5	1.36534	1.36534	0.862435	0.385692	0	2.08279	4	1.65252	1.65252	0.426469	0.213234	1.09429	2.13291	5	1.82038	1.82038	1.08562	0.485504	0	2.74024	0.809587	1	0.615742	0.886607	-1.1279	CK_StageI down vs CK_StageII	0.896652	1	0.634145	0.940343	-1.06344
OTU_51	0.930859	1	0.322148	4	2.6796	2.6796	0.753885	0.376942	1.60545	3.21475	4	2.54678	2.54678	0.715077	0.357539	1.63988	3.29291	5	2.08615	2.08615	1.28354	0.574018	0	3.50487	4	2.23031	2.23031	1.58884	0.794419	0	3.75337	5	2.42828	2.42828	0.890547	0.398265	1.71049	3.85781	0.866438	1	0.618661	1.09644	1.09644	CK_StageI up vs CK_StageII	0.432409	1	0.50578	1.50885	1.50885
OTU_119	0.935084	1	0.322148	4	1.44671	1.44671	1.04603	0.523015	0	2.49993	4	1.80979	1.80979	0.961361	0.48068	1.04138	3.04245	5	1.26243	1.26243	1.30278	0.582623	0	3.09613	4	1.58079	1.58079	0.639647	0.319823	1.08823	2.43696	5	1.2685	1.2685	1.1884	0.531467	0	2.45928	0.639613	1	0.589124	0.7775	-1.28617	CK_StageI down vs CK_StageII	0.80174	1	0.597147	1.13625	1.13625
OTU_245	0.941684	1	0.322148	4	0.535497	0.535497	0.620003	0.310002	0	1.1266	4	0.783026	0.783026	0.990578	0.495289	0	2.06164	5	0.537446	0.537446	0.76115	0.340397	0	1.61842	4	0.964908	0.964908	0.701267	0.350633	0	1.68145	5	0.702865	0.702865	1.0659	0.476687	0	2.40503	0.687421	1	0.589124	0.842338	-1.18717	CK_StageI down vs CK_StageII	0.99733	1	0.659509	0.99865	-1.00135
OTU_199	0.942825	1	0.322148	4	2.557	2.557	0.984181	0.49209	1.1138	3.29719	4	2.37256	2.37256	1.21336	0.606679	1.04138	3.50351	5	2.28892	2.28892	0.792481	0.354408	1.05572	3.01653	4	2.16931	2.16931	0.408628	0.204314	1.70936	2.7046	5	2.57283	2.57283	0.65308	0.292066	1.70031	3.51307	0.760386	1	0.592788	1.13638	1.13638	CK_StageI up vs CK_StageII	0.640955	1	0.55022	1.2042	1.2042
OTU_21	0.943016	1	0.322148	4	3.09416	3.09416	0.763378	0.381689	2.34648	4.13488	4	2.96766	2.96766	0.652213	0.326106	2.10445	3.6294	5	3.05987	3.05987	0.563748	0.252116	2.4126	3.82501	4	3.0486	3.0486	1.01717	0.508583	1.68145	4.07051	5	2.72579	2.72579	0.768818	0.343826	1.70031	3.79343	0.816203	1	0.616433	1.09164	1.09164	CK_StageI up vs CK_StageII	0.947004	1	0.65182	1.02406	1.02406
OTU_64	0.965227	1	0.327701	4	3.37024	3.37024	0.655257	0.327629	2.51947	3.93549	4	3.69132	3.69132	0.189	0.0944998	3.53381	3.93559	5	3.53297	3.53297	0.719249	0.321658	2.4126	4.35173	4	3.51522	3.51522	0.949405	0.474702	2.46996	4.41077	5	3.45386	3.45386	0.442079	0.197704	2.76278	3.90337	0.487248	1	0.536967	0.800474	-1.24926	CK_StageI down vs CK_StageII	0.709103	1	0.574006	0.893335	-1.1194
OTU_42	0.986289	1	0.332797	4	1.35395	1.35395	2.08662	1.04331	0	4.40042	4	0.927423	0.927423	0.674398	0.337199	0	1.61742	5	1.15728	1.15728	1.0734	0.480041	0	2.08517	4	0.881729	0.881729	1.15715	0.578576	0	2.43696	5	1.23603	1.23603	1.6467	0.736428	0	4.01834	0.674619	1	0.589124	1.344	1.344	CK_StageI up vs CK_StageII	0.837987	1	0.612814	1.14606	1.14606
OTU_592				4	0	0	0	0	0	0	4	0	0	0	0	0	0	5	0	0	0	0	0	0	4	0	0	0	0	0	0	5	0	0	0	0	0	0				1	1	No change between CK_StageI and CK_StageII				1	1
OTU_282				4	0	0	0	0	0	0	4	0	0	0	0	0	0	5	0	0	0	0	0	0	4	0	0	0	0	0	0	5	0	0	0	0	0	0				1	1	No change between CK_StageI and CK_StageII				1	1
OTU_223				4	0	0	0	0	0	0	4	0	0	0	0	0	0	5	0	0	0	0	0	0	4	0	0	0	0	0	0	5	0	0	0	0	0	0				1	1	No change between CK_StageI and CK_StageII				1	1
OTU_399				4	0	0	0	0	0	0	4	0	0	0	0	0	0	5	0	0	0	0	0	0	4	0	0	0	0	0	0	5	0	0	0	0	0	0				1	1	No change between CK_StageI and CK_StageII				1	1
OTU_734				4	0	0	0	0	0	0	4	0	0	0	0	0	0	5	0	0	0	0	0	0	4	0	0	0	0	0	0	5	0	0	0	0	0	0				1	1	No change between CK_StageI and CK_StageII				1	1
[truncated: 53 more columns]
